# Supplementary material for: A new advanced in silico drug discovery method for novel coronavirus (SARS-CoV-2) with tensor decomposition-based unsupervised feature extraction
Source: PubMed Central journal article supplement (PMC7485840; doi:10.1371/journal.pone.0238907), 2020-09-11
Supplement: pone.0238907.s001.pdf [file pone.0238907.s001.pdf]

S1 Table: Virus proteins that significantly interact with the 163 genes selected by TD based unsupervised FE and enriched by “Virus-Host PPI P-HIPSTer 2020” in Enrichr

| Term                                                                         | Overlap | P-value                | Adjusted P-value       |
|------------------------------------------------------------------------------|---------|------------------------|------------------------|
| SARS coronavirus excised_polyprotein 1..4369 (gene: orf1ab)                  | 12/194  | $6.67 \times 10^{-8}$  | $2.38 \times 10^{-6}$  |
| SARS coronavirus P2 full_polyprotein 1..4382                                 | 12/198  | $8.35 \times 10^{-8}$  | $2.76 \times 10^{-6}$  |
| SARS coronavirus hypothetical protein sars9b                                 | 4/17    | $9.31 \times 10^{-6}$  | $7.57 \times 10^{-5}$  |
| SARS coronavirus P2 hypothetical protein sars9b                              | 4/17    | $9.31 \times 10^{-6}$  | $7.562 \times 10^{-5}$ |
| SARS coronavirus Tor2 Orf13                                                  | 4/17    | $9.31 \times 10^{-6}$  | $7.55 \times 10^{-5}$  |
| SARS coronavirus nsp7-pp1a/pp1ab (gene: orf1ab)                              | 5/36    | $1.038 \times 10^{-5}$ | $8.18 \times 10^{-5}$  |
| SARS coronavirus 3C-like proteinase (gene: orf1ab)                           | 4/19    | $1.49 \times 10^{-5}$  | $1.10 \times 10^{-4}$  |
| SARS coronavirus nucleocapsid protein (gene: N)                              | 4/29    | $8.61 \times 10^{-5}$  | $4.23 \times 10^{-4}$  |
| SARS coronavirus P2 nucleocapsid protein                                     | 4/29    | $8.61 \times 10^{-5}$  | $4.23 \times 10^{-4}$  |
| SARS coronavirus Tor2 nucleocapsid protein                                   | 4/29    | $8.61 \times 10^{-5}$  | $4.22 \times 10^{-4}$  |
| SARS coronavirus nsp4-pp1a/pp1ab (gene: orf1ab)                              | 3/16    | $2.75 \times 10^{-4}$  | $9.89 \times 10^{-4}$  |
| SARS coronavirus formerly known as growth-factor-like protein (gene: orf1ab) | 3/17    | $3.32 \times 10^{-4}$  | $1.14 \times 10^{-3}$  |
| SARS coronavirus nsp8-pp1a/pp1ab (gene: orf1ab)                              | 4/45    | $4.88 \times 10^{-4}$  | $1.50 \times 10^{-3}$  |
| SARS coronavirus leader protein (gene: orf1ab)                               | 3/20    | $5.47 \times 10^{-4}$  | $1.61 \times 10^{-3}$  |
| SARS coronavirus RNA-dependent RNA polymerase (gene: orf1ab)                 | 2/9     | $2.28 \times 10^{-3}$  | $5.26 \times 10^{-3}$  |
| SARS coronavirus P2 spike glycoprotein precursor                             | 4/71    | $2.70 \times 10^{-3}$  | $6.08 \times 10^{-3}$  |
| SARS coronavirus nsp3-pp1a/pp1ab (gene: orf1ab)                              | 5/118   | $2.82 \times 10^{-3}$  | $6.34 \times 10^{-3}$  |
| SARS coronavirus E2 glycoprotein precursor (gene: S)                         | 4/72    | $2.84 \times 10^{-3}$  | $6.38 \times 10^{-3}$  |
| SARS coronavirus Tor2 spike glycoprotein                                     | 4/72    | $2.84 \times 10^{-3}$  | $6.38 \times 10^{-3}$  |
| SARS coronavirus 2-O-ribose methyltransferase (2-o-MT) (gene: orf1ab)        | 2/11    | $3.45 \times 10^{-3}$  | $7.26 \times 10^{-3}$  |
| SARS coronavirus hypothetical protein sars7a                                 | 3/38    | $3.63 \times 10^{-3}$  | $7.59 \times 10^{-3}$  |
| SARS coronavirus P2 hypothetical protein sars7a                              | 3/38    | $3.63 \times 10^{-3}$  | $7.58 \times 10^{-3}$  |
| SARS coronavirus Tor2 Orf8                                                   | 3/38    | $3.63 \times 10^{-3}$  | $7.58 \times 10^{-3}$  |
| SARS coronavirus nsp9-pp1a/pp1ab (gene: orf1ab)                              | 2/13    | $4.85 \times 10^{-3}$  | $9.45 \times 10^{-3}$  |
| SARS coronavirus nsp13-pp1ab (ZD, NTPase/HEL; RNA) (gene: orf1ab)            | 2/14    | $5.63 \times 10^{-3}$  | $1.06 \times 10^{-2}$  |
| SARS coronavirus Tor2 replicase 1AB                                          | 4/108   | $1.18 \times 10^{-2}$  | $1.94 \times 10^{-2}$  |
| SARS coronavirus P2 full_polyprotein 1..7073                                 | 4/109   | $1.22 \times 10^{-2}$  | $2.00 \times 10^{-2}$  |
