# Supplementary material for: A new advanced in silico drug discovery method for novel coronavirus (SARS-CoV-2) with tensor decomposition-based unsupervised feature extraction
Source: PubMed Central journal article supplement (PMC7485840; doi:10.1371/journal.pone.0238907), 2020-09-11
Supplement: pone.0238907.s002.pdf [file pone.0238907.s002.pdf]

S2 Table: Genes whose expression is altered by SARS-CoV-2-related viruses that significantly interact with the 163 genes selected by TD based unsupervised FE and enriched by “Virus Perturbations from GEO up” in Enrichr

| Term                                            | Overlap | P-value               | Adjusted P-value      |
|-------------------------------------------------|---------|-----------------------|-----------------------|
| SARS-BatSRBD 48Hour GSE47960                    | 11/300  | $3.66 \times 10^{-5}$ | $1.48 \times 10^{-3}$ |
| SARS-CoV 12Hour GSE17400                        | 11/300  | $3.66 \times 10^{-5}$ | $1.31 \times 10^{-3}$ |
| SARS-CoV 48Hour GSE47961                        | 11/300  | $3.66 \times 10^{-5}$ | $1.18 \times 10^{-3}$ |
| icSARS CoV 54Hour GSE37827                      | 11/300  | $3.66 \times 10^{-5}$ | $1.08 \times 10^{-3}$ |
| SARS-CoV MA15 Day2 GSE49263                     | 10/300  | $1.82 \times 10^{-4}$ | $3.45 \times 10^{-3}$ |
| SARS-CoV 60Hour GSE47960                        | 10/300  | $1.82 \times 10^{-4}$ | $3.26 \times 10^{-3}$ |
| SARS-CoV 96Hour GSE47961                        | 10/300  | $1.82 \times 10^{-4}$ | $3.09 \times 10^{-3}$ |
| SARS-ddORF6 24Hour GSE47961                     | 10/300  | $1.82 \times 10^{-4}$ | $2.93 \times 10^{-3}$ |
| SARS-BatSRBD 36Hour GSE47960                    | 9/300   | $8.14 \times 10^{-4}$ | $1.05 \times 10^{-2}$ |
| SARS-CoV MA15 Day4-C57BL-6 GSE40824             | 9/300   | $8.14 \times 10^{-4}$ | $1.01 \times 10^{-2}$ |
| SARS-dORF6 72Hour GSE47960                      | 9/300   | $8.14 \times 10^{-4}$ | $9.73 \times 10^{-3}$ |
| SARS-ddORF6 72Hour GSE47961                     | 9/300   | $8.14 \times 10^{-4}$ | $9.39 \times 10^{-3}$ |
| SARS-BatSRBD 84Hour GSE47961                    | 8/300   | $3.27 \times 10^{-3}$ | $2.46 \times 10^{-2}$ |
| SARS-CoV MA15 Day2 GSE49262                     | 8/300   | $3.27 \times 10^{-3}$ | $2.40 \times 10^{-2}$ |
| SARS-CoV MA15 Day4-PFU-10 <sup>5</sup> GSE33266 | 8/300   | $3.27 \times 10^{-3}$ | $2.35 \times 10^{-2}$ |
| SARS-dORF6 84Hour GSE47962                      | 8/300   | $3.27 \times 10^{-3}$ | $2.30 \times 10^{-2}$ |
| cSARS Bat SRBD 24Hour GSE37827                  | 8/300   | $3.27 \times 10^{-3}$ | $2.25 \times 10^{-2}$ |
| cSARS Bat SRBD 60Hour GSE37827                  | 8/300   | $3.27 \times 10^{-3}$ | $2.20 \times 10^{-2}$ |
| icSARS CoV 0Hour GSE37827                       | 8/300   | $3.27 \times 10^{-3}$ | $2.16 \times 10^{-2}$ |
| icSARS CoV 48Hour GSE37827                      | 8/300   | $3.27 \times 10^{-3}$ | $2.11 \times 10^{-2}$ |
