# Supplementary material for: A new advanced in silico drug discovery method for novel coronavirus (SARS-CoV-2) with tensor decomposition-based unsupervised feature extraction
Source: PubMed Central journal article supplement (PMC7485840; doi:10.1371/journal.pone.0238907), 2020-09-11
Supplement: pone.0238907.s003.pdf [file pone.0238907.s003.pdf]

S3 Table: Genes whose expression was altered by SARS-CoV-2-related viruses that significantly interact with the 163 genes selected by TD-based unsupervised FE and enriched by “Virus Perturbations from GEO down” in Enrichr

| Term                                            | Overlap | P-value               | Adjusted P-value      |
|-------------------------------------------------|---------|-----------------------|-----------------------|
| SARS-CoV 0Hour GSE47961                         | 14/300  | $1.76 \times 10^{-7}$ | $1.42 \times 10^{-5}$ |
| SARS-ddORF6 0Hour GSE47961                      | 10/300  | $1.82 \times 10^{-4}$ | $4.51 \times 10^{-3}$ |
| SARS-BatSRBD 96Hour GSE47960                    | 9/300   | $8.14 \times 10^{-4}$ | $1.38 \times 10^{-2}$ |
| SARS-CoV 24Hour GSE17400                        | 9/300   | $8.14 \times 10^{-4}$ | $1.31 \times 10^{-2}$ |
| cSARS Bat SRBD 60Hour GSE37827                  | 9/300   | $8.14 \times 10^{-4}$ | $1.25 \times 10^{-2}$ |
| icSARS CoV 48Hour GSE37827                      | 9/300   | $8.14 \times 10^{-4}$ | $1.19 \times 10^{-2}$ |
| SARS-CoV MA15 Day4-PFU-10 <sup>2</sup> GSE33266 | 8/300   | $3.27 \times 10^{-3}$ | $3.11 \times 10^{-2}$ |
