# Supplementary material for: A new advanced in silico drug discovery method for novel coronavirus (SARS-CoV-2) with tensor decomposition-based unsupervised feature extraction
Source: PubMed Central journal article supplement (PMC7485840; doi:10.1371/journal.pone.0238907), 2020-09-11
Supplement: pone.0238907.s004.pdf [file pone.0238907.s004.pdf]

S4 Table: C646 significantly affects the expression of the selected 163 genes as evident in the “LINCS L1000 Chem Pert up/down” category in Enrichr. The last number after the - is dose density.

| Term                       | Overlap | P-value                | Adjusted P-value       |
|----------------------------|---------|------------------------|------------------------|
| LINCS L1000 Chem Pert up   |         |                        |                        |
| LJP008 HEPG2 24H-C646-10   | 21/104  | $1.04 \times 10^{-23}$ | $1.72 \times 10^{-19}$ |
| LJP008 PC3 24H-C646-10     | 11/141  | $2.22 \times 10^{-8}$  | $9.95 \times 10^{-7}$  |
| LJP008 HCC515 24H-C646-10  | 8/63    | $4.34 \times 10^{-8}$  | $1.75 \times 10^{-6}$  |
| LJP008 A549 24H-C646-10    | 6/51    | $3.55 \times 10^{-6}$  | $7.05 \times 10^{-5}$  |
| LJP008 MCF7 24H-C646-10    | 3/45    | $5.87 \times 10^{-3}$  | $3.24 \times 10^{-2}$  |
| LINCS L1000 Chem Pert down |         |                        |                        |
| LJP008 HA1E 24H-C646-10    | 7/96    | $1.36 \times 10^{-5}$  | $2.11 \times 10^{-4}$  |
| LJP008 PC3 24H-C646-10     | 4/59    | $1.37 \times 10^{-3}$  | $1.01 \times 10^{-2}$  |
| LJP008 A375 24H-C646-10    | 4/80    | $4.16 \times 10^{-3}$  | $2.53 \times 10^{-2}$  |
| LJP008 HEPG2 24H-C646-10   | 4/81    | $4.35 \times 10^{-3}$  | $2.62 \times 10^{-2}$  |
