# Supplementary material for: A new advanced in silico drug discovery method for novel coronavirus (SARS-CoV-2) with tensor decomposition-based unsupervised feature extraction
Source: PubMed Central journal article supplement (PMC7485840; doi:10.1371/journal.pone.0238907), 2020-09-11
Supplement: pone.0238907.s005.pdf [file pone.0238907.s005.pdf]

S5 Table: Chelerythrine chlorid significantly affects the expression of the selected 163 genes as evident in the “LINCS L1000 Chem Pert up/down” category in Enrichr. The last number after the - is dose density.

| Term                                          | Overlap                | P-value                | Adjusted P-value       |
|-----------------------------------------------|------------------------|------------------------|------------------------|
| LINCS L1000 Chem Pert up                      |                        |                        |                        |
| LJP009 MCF7 24H-chelerythrine chloride-10     | $2.01 \times 10^{-23}$ | $2.22 \times 10^{-19}$ |                        |
| LJP009 HEPG2 24H-chelerythrine chloride-3.33  | 16/50                  | $6.92 \times 10^{-22}$ | $4.58 \times 10^{-18}$ |
| LJP009 PC3 24H-chelerythrine chloride-10      | 14/149                 | $2.04 \times 10^{-11}$ | $3.11 \times 10^{-9}$  |
| LJP009 A375 24H-chelerythrine chloride-1.11   | 9/55                   | $5.86 \times 10^{-10}$ | $4.84 \times 10^{-8}$  |
| LJP009 A375 24H-chelerythrine chloride-3.33   | 8/57                   | $1.93 \times 10^{-8}$  | $8.87 \times 10^{-7}$  |
| LJP009 HT29 24H-chelerythrine chloride-10     | 9/94                   | $7.48 \times 10^{-8}$  | $2.82 \times 10^{-6}$  |
| LJP009 HCC515 24H-chelerythrine chloride-10   | 8/71                   | $1.13 \times 10^{-7}$  | $4.00 \times 10^{-6}$  |
| LJP009 HA1E 24H-chelerythrine chloride-3.33   | 5/33                   | $6.67 \times 10^{-6}$  | $1.20 \times 10^{-4}$  |
| LJP009 HCC515 24H-chelerythrine chloride-0.04 | 3/28                   | $1.50 \times 10^{-3}$  | $1.08 \times 10^{-2}$  |
| LJP009 PC3 24H-chelerythrine chloride-1.11    | 3/42                   | $4.83 \times 10^{-3}$  | $2.80 \times 10^{-2}$  |
| LINCS L1000 Chem Pert down                    |                        |                        |                        |
| LJP009 HEPG2 24H-chelerythrine chloride-10    | 14/137                 | $6.46 \times 10^{-12}$ | $1.15 \times 10^{-9}$  |
| LJP009 HCC515 24H-chelerythrine chloride-10   | 8/51                   | $7.74 \times 10^{-9}$  | $3.90 \times 10^{-7}$  |
| LJP009 A375 24H-chelerythrine chloride-1.11   | 5/45                   | $3.17 \times 10^{-5}$  | $4.35 \times 10^{-4}$  |
| LJP009 HEPG2 24H-chelerythrine chloride-3.33  | 3/26                   | $1.20 \times 10^{-3}$  | $9.11 \times 10^{-3}$  |
| LJP009 A375 24H-chelerythrine chloride-3.33   | 3/48                   | $7.03 \times 10^{-3}$  | $3.83 \times 10^{-2}$  |
