# Supplementary material for: A new advanced in silico drug discovery method for novel coronavirus (SARS-CoV-2) with tensor decomposition-based unsupervised feature extraction
Source: PubMed Central journal article supplement (PMC7485840; doi:10.1371/journal.pone.0238907), 2020-09-11
Supplement: pone.0238907.s006.pdf [file pone.0238907.s006.pdf]

S6 Table: Canertinib significantly affects the expression of the selected 163 genes as evident in the “LINCS L1000 Chem Pert up” category in Enrichr. The last number after the - is dose density.

| Term                                | Overlap | P-value                | Adjusted P-value       |
|-------------------------------------|---------|------------------------|------------------------|
| LINCS L1000 Chem Pert up            |         |                        |                        |
| LJP006 HEPG2 24H-canertinib-10      | 19/96   | $2.29 \times 10^{-21}$ | $1.27 \times 10^{-17}$ |
| LJP006 LNCAP 24H-canertinib-10      | 14/157  | $4.14 \times 10^{-11}$ | $5.70 \times 10^{-9}$  |
| LJP006 HME1 24H-canertinib-0.12     | 12/113  | $1.39 \times 10^{-10}$ | $1.47 \times 10^{-8}$  |
| LJP006 HCC515 24H-canertinib-10     | 11/91   | $2.02 \times 10^{-10}$ | $1.99 \times 10^{-8}$  |
| LJP006 MDAMB231 24H-canertinib-10   | 11/97   | $4.08 \times 10^{-10}$ | $3.56 \times 10^{-8}$  |
| LJP006 HME1 24H-canertinib-3.33     | 9/80    | $1.80 \times 10^{-8}$  | $8.37 \times 10^{-7}$  |
| LJP006 MDAMB231 24H-canertinib-3.33 | 7/39    | $2.59 \times 10^{-8}$  | $1.14 \times 10^{-6}$  |
| LJP006 HME1 24H-canertinib-0.37     | 10/114  | $3.22 \times 10^{-8}$  | $1.36 \times 10^{-6}$  |
| LJP006 LNCAP 3H-canertinib-10       | 7/41    | $3.74 \times 10^{-8}$  | $1.56 \times 10^{-6}$  |
| LJP006 HCC515 24H-canertinib-3.33   | 9/91    | $5.63 \times 10^{-8}$  | $2.21 \times 10^{-6}$  |
| LJP006 HCC515 24H-canertinib-1.11   | 8/77    | $2.14 \times 10^{-7}$  | $6.75 \times 10^{-6}$  |
| LJP006 A375 24H-canertinib-1.11     | 7/53    | $2.36 \times 10^{-7}$  | $7.38 \times 10^{-6}$  |
| LJP006 MCF10A 24H-canertinib-10     | 10/153  | $5.17 \times 10^{-7}$  | $1.42 \times 10^{-5}$  |
| LJP006 BT20 24H-canertinib-10       | 9/123   | $7.57 \times 10^{-7}$  | $1.97 \times 10^{-5}$  |
| LJP006 MCF10A 24H-canertinib-0.04   | 10/163  | $9.26 \times 10^{-7}$  | $2.33 \times 10^{-5}$  |
| LJP006 A375 24H-canertinib-3.33     | 6/53    | $4.47 \times 10^{-6}$  | $8.53 \times 10^{-5}$  |
| LJP006 HME1 3H-canertinib-1.11      | 6/56    | $6.19 \times 10^{-6}$  | $1.13 \times 10^{-4}$  |
| LJP006 BT20 24H-canertinib-1.11     | 7/86    | $6.57 \times 10^{-6}$  | $1.18 \times 10^{-4}$  |
| LJP006 MCF10A 24H-canertinib-0.37   | 8/128   | $1.02 \times 10^{-5}$  | $1.70 \times 10^{-4}$  |
| LJP006 HME1 3H-canertinib-3.33      | 6/64    | $1.36 \times 10^{-5}$  | $2.14 \times 10^{-4}$  |
| LJP006 HA1E 24H-canertinib-3.33     | 5/41    | $2.00 \times 10^{-5}$  | $2.95 \times 10^{-4}$  |
| LJP006 MCF10A 24H-canertinib-3.33   | 8/146   | $2.66 \times 10^{-5}$  | $3.79 \times 10^{-4}$  |
| LJP006 MCF10A 24H-canertinib-0.12   | 8/156   | $4.28 \times 10^{-5}$  | $5.68 \times 10^{-4}$  |
| LJP006 HME1 3H-canertinib-0.12      | 4/26    | $5.53 \times 10^{-5}$  | $7.03 \times 10^{-4}$  |
| LJP006 MDAMB231 3H-canertinib-10    | 5/51    | $5.87 \times 10^{-5}$  | $7.36 \times 10^{-4}$  |
| LJP006 HCC515 24H-canertinib-0.37   | 6/84    | $6.43 \times 10^{-5}$  | $7.95 \times 10^{-4}$  |
| LJP006 MCF10A 24H-canertinib-1.11   | 7/127   | $8.27 \times 10^{-5}$  | $9.81 \times 10^{-4}$  |
| LJP006 HME1 24H-canertinib-1.11     | 7/128   | $8.69 \times 10^{-5}$  | $1.02 \times 10^{-3}$  |
| LJP006 HME1 3H-canertinib-0.37      | 5/59    | $1.19 \times 10^{-4}$  | $1.32 \times 10^{-3}$  |
| LJP006 HME1 24H-canertinib-0.04     | 6/97    | $1.43 \times 10^{-4}$  | $1.55 \times 10^{-3}$  |
| LJP006 PC3 24H-canertinib-10        | 4/35    | $1.83 \times 10^{-4}$  | $1.89 \times 10^{-3}$  |
| LJP006 MCF7 3H-canertinib-10        | 4/37    | $2.28 \times 10^{-4}$  | $2.27 \times 10^{-3}$  |
| LJP006 BT20 3H-canertinib-10        | 4/41    | $3.40 \times 10^{-4}$  | $3.19 \times 10^{-3}$  |
| LJP006 MCF7 24H-canertinib-10       | 5/75    | $3.68 \times 10^{-4}$  | $3.41 \times 10^{-3}$  |
| LJP006 HCC515 24H-canertinib-0.04   | 5/76    | $3.92 \times 10^{-4}$  | $3.59 \times 10^{-3}$  |
| LJP006 HEPG2 24H-canertinib-0.04    | 4/49    | $6.77 \times 10^{-4}$  | $5.68 \times 10^{-3}$  |
| LJP006 HCC515 24H-canertinib-0.12   | 4/53    | $9.12 \times 10^{-4}$  | $7.25 \times 10^{-3}$  |
| LJP006 SKBR3 24H-canertinib-3.33    | 5/94    | $1.04 \times 10^{-3}$  | $8.06 \times 10^{-3}$  |
| LJP006 HA1E 24H-canertinib-10       | 6/152   | $1.56 \times 10^{-3}$  | $1.12 \times 10^{-2}$  |
| LJP006 SKBR3 24H-canertinib-10      | 5/110   | $2.08 \times 10^{-3}$  | $1.42 \times 10^{-2}$  |
| LJP006 MCF10A 3H-canertinib-3.33    | 4/70    | $2.57 \times 10^{-3}$  | $1.70 \times 10^{-2}$  |
| LJP006 BT20 24H-canertinib-0.12     | 4/71    | $2.70 \times 10^{-3}$  | $1.77 \times 10^{-2}$  |
| LJP006 SKBR3 24H-canertinib-0.37    | 4/78    | $3.80 \times 10^{-3}$  | $2.31 \times 10^{-2}$  |
| LJP006 HS578T 24H-canertinib-10     | 5/156   | $9.11 \times 10^{-3}$  | $4.58 \times 10^{-2}$  |
| LJP006 BT20 24H-canertinib-3.33     | 4/102   | $9.74 \times 10^{-3}$  | $4.81 \times 10^{-2}$  |
