# Supplementary material for: A new advanced in silico drug discovery method for novel coronavirus (SARS-CoV-2) with tensor decomposition-based unsupervised feature extraction
Source: PubMed Central journal article supplement (PMC7485840; doi:10.1371/journal.pone.0238907), 2020-09-11
Supplement: pone.0238907.s007.pdf [file pone.0238907.s007.pdf]

S7 Table: Canertinib significantly affects the expression of the selected 163 genes as evident in the “LINCS L1000 Chem Pert down” category in Enrichr. The last number after the - is dose density.

| Term                                | Overlap | P-value                | Adjusted P-value       |
|-------------------------------------|---------|------------------------|------------------------|
| LINCS L1000 Chem Pert down          |         |                        |                        |
| LJP006 HME1 24H-canertinib-10       | 13/89   | $3.55 \times 10^{-13}$ | $1.12 \times 10^{-10}$ |
| LJP006 HME1 3H-canertinib-10        | 15/139  | $4.94 \times 10^{-13}$ | $1.46 \times 10^{-10}$ |
| LJP006 BT20 24H-canertinib-10       | 14/128  | $2.53 \times 10^{-12}$ | $5.44 \times 10^{-10}$ |
| LJP006 HS578T 24H-canertinib-10     | 12/92   | $1.18 \times 10^{-11}$ | $1.79 \times 10^{-9}$  |
| LJP006 BT20 24H-canertinib-3.33     | 11/81   | $5.56 \times 10^{-11}$ | $6.53 \times 10^{-9}$  |
| LJP006 HA1E 24H-canertinib-10       | 11/93   | $2.57 \times 10^{-10}$ | $2.29 \times 10^{-8}$  |
| LJP006 SKBR3 24H-canertinib-3.33    | 10/83   | $1.43 \times 10^{-9}$  | $9.39 \times 10^{-8}$  |
| LJP006 SKBR3 24H-canertinib-0.37    | 9/65    | $2.75 \times 10^{-9}$  | $1.62 \times 10^{-7}$  |
| LJP006 MCF10A 3H-canertinib-1.11    | 10/98   | $7.41 \times 10^{-9}$  | $3.75 \times 10^{-7}$  |
| LJP006 HME1 3H-canertinib-1.11      | 9/82    | $2.24 \times 10^{-8}$  | $9.31 \times 10^{-7}$  |
| LJP006 BT20 24H-canertinib-0.37     | 8/63    | $4.34 \times 10^{-8}$  | $1.66 \times 10^{-6}$  |
| LJP006 HS578T 3H-canertinib-10      | 7/54    | $2.69 \times 10^{-7}$  | $7.75 \times 10^{-6}$  |
| LJP006 MCF10A 3H-canertinib-0.37    | 8/85    | $4.63 \times 10^{-7}$  | $1.20 \times 10^{-5}$  |
| LJP006 MCF10A 24H-canertinib-3.33   | 11/193  | $5.44 \times 10^{-7}$  | $1.38 \times 10^{-5}$  |
| LJP006 HME1 3H-canertinib-3.33      | 8/89    | $6.61 \times 10^{-7}$  | $1.62 \times 10^{-5}$  |
| LJP006 BT20 24H-canertinib-0.04     | 6/46    | $1.91 \times 10^{-6}$  | $3.98 \times 10^{-5}$  |
| LJP006 HS578T 3H-canertinib-0.04    | 6/49    | $2.80 \times 10^{-6}$  | $5.46 \times 10^{-5}$  |
| LJP006 HCC515 24H-canertinib-10     | 7/79    | $3.72 \times 10^{-6}$  | $6.95 \times 10^{-5}$  |
| LJP006 BT20 24H-canertinib-1.11     | 6/52    | $3.99 \times 10^{-6}$  | $7.42 \times 10^{-5}$  |
| LJP006 SKBR3 24H-canertinib-1.11    | 7/80    | $4.05 \times 10^{-6}$  | $7.48 \times 10^{-5}$  |
| LJP006 SKBR3 24H-canertinib-10      | 7/85    | $6.08 \times 10^{-6}$  | $1.06 \times 10^{-4}$  |
| LJP006 MCF10A 24H-canertinib-0.12   | 9/170   | $1.09 \times 10^{-5}$  | $1.75 \times 10^{-4}$  |
| LJP006 MCF10A 3H-canertinib-3.33    | 7/94    | $1.19 \times 10^{-5}$  | $1.87 \times 10^{-4}$  |
| LJP006 SKBR3 24H-canertinib-0.12    | 7/94    | $1.19 \times 10^{-5}$  | $1.87 \times 10^{-4}$  |
| LJP006 A375 24H-canertinib-10       | 7/100   | $1.78 \times 10^{-5}$  | $2.62 \times 10^{-4}$  |
| LJP006 MCF10A 3H-canertinib-0.12    | 7/100   | $1.78 \times 10^{-5}$  | $2.62 \times 10^{-4}$  |
| LJP006 HA1E 24H-canertinib-3.33     | 6/71    | $2.47 \times 10^{-5}$  | $3.51 \times 10^{-4}$  |
| LJP006 HCC515 24H-canertinib-3.33   | 6/72    | $2.68 \times 10^{-5}$  | $3.77 \times 10^{-4}$  |
| LJP006 MCF10A 3H-canertinib-10      | 5/46    | $3.54 \times 10^{-5}$  | $4.75 \times 10^{-4}$  |
| LJP006 MCF7 3H-canertinib-10        | 4/28    | $7.47 \times 10^{-5}$  | $8.87 \times 10^{-4}$  |
| LJP006 HME1 3H-canertinib-0.12      | 5/61    | $1.39 \times 10^{-4}$  | $1.49 \times 10^{-3}$  |
| LJP006 BT20 3H-canertinib-10        | 4/33    | $1.45 \times 10^{-4}$  | $1.53 \times 10^{-3}$  |
| LJP006 HME1 24H-canertinib-0.12     | 5/64    | $1.75 \times 10^{-4}$  | $1.81 \times 10^{-3}$  |
| LJP006 HME1 24H-canertinib-0.04     | 5/72    | $3.05 \times 10^{-4}$  | $2.90 \times 10^{-3}$  |
| LJP006 HME1 24H-canertinib-0.37     | 5/73    | $3.25 \times 10^{-4}$  | $3.06 \times 10^{-3}$  |
| LJP006 HME1 3H-canertinib-0.37      | 5/73    | $3.25 \times 10^{-4}$  | $3.06 \times 10^{-3}$  |
| LJP006 MDAMB231 24H-canertinib-10   | 5/76    | $3.92 \times 10^{-4}$  | $3.56 \times 10^{-3}$  |
| LJP006 SKBR3 3H-canertinib-0.37     | 3/19    | $4.68 \times 10^{-4}$  | $4.14 \times 10^{-3}$  |
| LJP006 A375 24H-canertinib-3.33     | 4/45    | $4.88 \times 10^{-4}$  | $4.29 \times 10^{-3}$  |
| LJP006 HME1 24H-canertinib-1.11     | 5/82    | $5.56 \times 10^{-4}$  | $4.77 \times 10^{-3}$  |
| LJP006 MCF7 24H-canertinib-10       | 5/83    | $5.88 \times 10^{-4}$  | $4.98 \times 10^{-3}$  |
| LJP006 A375 24H-canertinib-1.11     | 4/51    | $7.89 \times 10^{-4}$  | $6.40 \times 10^{-3}$  |
| LJP006 MCF10A 3H-canertinib-0.04    | 4/51    | $7.89 \times 10^{-4}$  | $6.39 \times 10^{-3}$  |
| LJP006 BT20 3H-canertinib-0.12      | 3/24    | $9.48 \times 10^{-4}$  | $7.48 \times 10^{-3}$  |
| LJP006 SKBR3 24H-canertinib-0.04    | 5/93    | $9.86 \times 10^{-4}$  | $7.71 \times 10^{-3}$  |
| LJP006 HCC515 24H-canertinib-0.04   | 3/25    | $1.07 \times 10^{-3}$  | $8.26 \times 10^{-3}$  |
| LJP006 HME1 3H-canertinib-0.04      | 4/57    | $1.20 \times 10^{-3}$  | $9.10 \times 10^{-3}$  |
| LJP006 SKBR3 3H-canertinib-10       | 3/26    | $1.20 \times 10^{-3}$  | $9.09 \times 10^{-3}$  |
| LJP006 MDAMB231 3H-canertinib-10    | 4/62    | $1.64 \times 10^{-3}$  | $1.18 \times 10^{-2}$  |
| LJP006 BT20 24H-canertinib-0.12     | 3/32    | $2.22 \times 10^{-3}$  | $1.51 \times 10^{-2}$  |
| LJP006 MCF7 24H-canertinib-3.33     | 3/37    | $3.37 \times 10^{-3}$  | $2.13 \times 10^{-2}$  |
| LJP006 HCC515 24H-canertinib-0.37   | 3/39    | $3.92 \times 10^{-3}$  | $2.41 \times 10^{-2}$  |
| LJP006 MCF10A 24H-canertinib-0.04   | 6/186   | $4.25 \times 10^{-3}$  | $2.57 \times 10^{-2}$  |
| LJP006 A549 24H-canertinib-10       | 3/43    | $5.16 \times 10^{-3}$  | $3.00 \times 10^{-2}$  |
| LJP006 MDAMB231 24H-canertinib-3.33 | 2/17    | $8.29 \times 10^{-3}$  | $4.36 \times 10^{-2}$  |
