# Supplementary material for: A new advanced in silico drug discovery method for novel coronavirus (SARS-CoV-2) with tensor decomposition-based unsupervised feature extraction
Source: PubMed Central journal article supplement (PMC7485840; doi:10.1371/journal.pone.0238907), 2020-09-11
Supplement: pone.0238907.s008.pdf [file pone.0238907.s008.pdf]

S8 Table: BX-795 significantly affects the expression of the selected 163 genes as evident in the “LINCS L1000 Chem Pert up/down” category in Enrichr. The last number after the - is dose density.

| Term                         | Overlap | P-value                | Adjusted P-value       |
|------------------------------|---------|------------------------|------------------------|
| LINCS L1000 Chem Pert up     |         |                        |                        |
| LJP009 PC3 24H-BX-795-10     | 18/92   | $3.37 \times 10^{-20}$ | $1.01 \times 10^{-16}$ |
| LJP009 HT29 24H-BX-795-10    | 14/102  | $1.04 \times 10^{-13}$ | $3.95 \times 10^{-11}$ |
| LJP009 HCC515 24H-BX-795-10  | 9/101   | $1.40 \times 10^{-7}$  | $4.80 \times 10^{-6}$  |
| LJP009 HEPG2 24H-BX-795-10   | 8/81    | $3.18 \times 10^{-7}$  | $9.42 \times 10^{-6}$  |
| LJP009 MCF7 24H-BX-795-10    | 9/113   | $3.68 \times 10^{-7}$  | $1.07 \times 10^{-5}$  |
| LJP009 MCF7 24H-BX-795-3.33  | 5/58    | $1.09 \times 10^{-4}$  | $1.24 \times 10^{-3}$  |
| LJP009 A549 24H-BX-795-10    | 4/40    | $3.09 \times 10^{-4}$  | $2.94 \times 10^{-3}$  |
| LJP009 HA1E 24H-BX-795-10    | 3/34    | $2.64 \times 10^{-3}$  | $1.74 \times 10^{-2}$  |
| LJP009 A375 24H-BX-795-1.11  | 3/51    | $8.31 \times 10^{-3}$  | $4.26 \times 10^{-2}$  |
| LINCS L1000 Chem Pert down   |         |                        |                        |
| LJP009 HA1E 24H-BX-795-10    | 6/43    | $1.27 \times 10^{-6}$  | $2.84 \times 10^{-5}$  |
| LJP009 HA1E 24H-BX-795-3.33  | 4/37    | $2.28 \times 10^{-4}$  | $2.27 \times 10^{-3}$  |
| LJP009 HEPG2 24H-BX-795-3.33 | 3/36    | $3.11 \times 10^{-3}$  | $2.01 \times 10^{-2}$  |
| LJP009 HEPG2 24H-BX-795-10   | 4/94    | $7.35 \times 10^{-3}$  | $3.97 \times 10^{-2}$  |
