# Supplementary material for: A new advanced in silico drug discovery method for novel coronavirus (SARS-CoV-2) with tensor decomposition-based unsupervised feature extraction
Source: PubMed Central journal article supplement (PMC7485840; doi:10.1371/journal.pone.0238907), 2020-09-11
Supplement: pone.0238907.s009.pdf [file pone.0238907.s009.pdf]

S9 Table: Sorafenib significantly affects the expression of the selected 163 genes as evident in the “LINCS L1000 Chem Pert up” category in Enrichr. The last number after the - is dose density.

| Term                              | Overlap | P-value                | Adjusted P-value       |
|-----------------------------------|---------|------------------------|------------------------|
| LINCS L1000 Chem Pert up          |         |                        |                        |
| LJP006 SKBR3 3H-sorafenib-10      | 15/56   | $2.94 \times 10^{-19}$ | $8.10 \times 10^{-16}$ |
| LJP006 A549 24H-sorafenib-10      | 14/146  | $1.55 \times 10^{-11}$ | $2.50 \times 10^{-9}$  |
| LJP006 HEPG2 24H-sorafenib-10     | 10/74   | $4.49 \times 10^{-10}$ | $3.87 \times 10^{-8}$  |
| LJP006 LNCAP 24H-sorafenib-10     | 13/165  | $9.86 \times 10^{-10}$ | $7.44 \times 10^{-8}$  |
| LJP006 MCF7 24H-sorafenib-10      | 8/59    | $2.55 \times 10^{-8}$  | $1.13 \times 10^{-6}$  |
| LJP006 HME1 3H-sorafenib-3.33     | 7/44    | $6.24 \times 10^{-8}$  | $2.43 \times 10^{-6}$  |
| LJP006 HME1 24H-sorafenib-3.33    | 9/107   | $2.30 \times 10^{-7}$  | $7.23 \times 10^{-6}$  |
| LJP006 PC3 24H-sorafenib-10       | 8/78    | $2.37 \times 10^{-7}$  | $7.36 \times 10^{-6}$  |
| LJP006 SKBR3 24H-sorafenib-10     | 9/111   | $3.16 \times 10^{-7}$  | $9.36 \times 10^{-6}$  |
| LJP006 HT29 24H-sorafenib-10      | 7/57    | $3.94 \times 10^{-7}$  | $1.13 \times 10^{-5}$  |
| LJP006 HCC515 24H-sorafenib-10    | 9/117   | $4.95 \times 10^{-7}$  | $1.38 \times 10^{-5}$  |
| LJP006 BT20 24H-sorafenib-10      | 8/86    | $5.07 \times 10^{-7}$  | $1.40 \times 10^{-5}$  |
| LJP006 HA1E 24H-sorafenib-10      | 9/119   | $5.72 \times 10^{-7}$  | $1.55 \times 10^{-5}$  |
| LJP006 HME1 24H-sorafenib-10      | 8/111   | $3.55 \times 10^{-6}$  | $7.05 \times 10^{-5}$  |
| LJP006 BT20 3H-sorafenib-10       | 4/20    | $1.86 \times 10^{-5}$  | $2.78 \times 10^{-4}$  |
| LJP006 HME1 3H-sorafenib-10       | 7/114   | $4.16 \times 10^{-5}$  | $5.55 \times 10^{-4}$  |
| LJP006 A375 24H-sorafenib-10      | 6/84    | $6.43 \times 10^{-5}$  | $7.96 \times 10^{-4}$  |
| LJP006 HME1 24H-sorafenib-1.11    | 5/78    | $4.42 \times 10^{-4}$  | $3.96 \times 10^{-3}$  |
| LJP006 HEPG2 24H-sorafenib-3.33   | 4/53    | $9.12 \times 10^{-4}$  | $7.24 \times 10^{-3}$  |
| LINCS L1000 Chem Pert down        |         |                        |                        |
| LJP006 HA1E 24H-sorafenib-10      | 12/92   | $1.18 \times 10^{-11}$ | $1.80 \times 10^{-9}$  |
| LJP006 HME1 24H-sorafenib-10      | 10/95   | $5.46 \times 10^{-9}$  | $2.92 \times 10^{-7}$  |
| LJP006 HEPG2 24H-sorafenib-10     | 9/91    | $5.63 \times 10^{-8}$  | $2.07 \times 10^{-6}$  |
| LJP006 HS578T 24H-sorafenib-10    | 7/63    | $7.91 \times 10^{-7}$  | $1.89 \times 10^{-5}$  |
| LJP006 HEPG2 24H-sorafenib-3.33   | 6/51    | $3.55 \times 10^{-6}$  | $6.65 \times 10^{-5}$  |
| LJP006 HS578T 3H-sorafenib-10     | 5/41    | $2.00 \times 10^{-5}$  | $2.92 \times 10^{-4}$  |
| LJP006 HME1 3H-sorafenib-10       | 6/74    | $3.13 \times 10^{-5}$  | $4.30 \times 10^{-4}$  |
| LJP006 BT20 24H-sorafenib-10      | 6/79    | $4.54 \times 10^{-5}$  | $5.84 \times 10^{-4}$  |
| LJP006 MDAMB231 3H-sorafenib-10   | 5/58    | $1.09 \times 10^{-4}$  | $1.21 \times 10^{-3}$  |
| LJP006 SKBR3 24H-sorafenib-10     | 5/125   | $3.62 \times 10^{-3}$  | $2.27 \times 10^{-2}$  |
| LJP006 HME1 24H-sorafenib-3.33    | 4/88    | $5.83 \times 10^{-3}$  | $3.31 \times 10^{-2}$  |
| LJP006 MDAMB231 3H-sorafenib-1.11 | 3/48    | $7.03 \times 10^{-3}$  | $3.82 \times 10^{-2}$  |
