# Supplementary material for: A new advanced in silico drug discovery method for novel coronavirus (SARS-CoV-2) with tensor decomposition-based unsupervised feature extraction
Source: PubMed Central journal article supplement (PMC7485840; doi:10.1371/journal.pone.0238907), 2020-09-11
Supplement: pone.0238907.s010.pdf [file pone.0238907.s010.pdf]

S10 Table: QL-X-138 significantly affects the expression of the selected 163 genes as evident in the “LINCS L1000 Chem Pert up” category in Enrichr. The last number after the - is dose density.

| Term                              | Overlap | P-value                | Adjusted P-value      |
|-----------------------------------|---------|------------------------|-----------------------|
| LINCS L1000 Chem Pert up          |         |                        |                       |
| LJP006 MCF10A 24H-QL-X-138-3.33   | 11/105  | $9.66 \times 10^{-10}$ | $7.34 \times 10^{-8}$ |
| LJP006 HCC515 24H-QL-X-138-10     | 13/169  | $1.32 \times 10^{-9}$  | $9.25 \times 10^{-8}$ |
| LJP006 HME1 3H-QL-X-138-3.33      | 11/111  | $1.76 \times 10^{-9}$  | $1.17 \times 10^{-7}$ |
| LJP006 MDAMB231 24H-QL-X-138-1.11 | 6/25    | $4.16 \times 10^{-8}$  | $1.70 \times 10^{-6}$ |
| LJP006 HME1 24H-QL-X-138-3.33     | 11/150  | $4.21 \times 10^{-8}$  | $1.70 \times 10^{-6}$ |
| LJP006 PC3 24H-QL-X-138-3.33      | 8/68    | $8.00 \times 10^{-8}$  | $2.98 \times 10^{-6}$ |
| LJP006 HME1 24H-QL-X-138-1.11     | 9/111   | $3.16 \times 10^{-7}$  | $9.39 \times 10^{-6}$ |
| LJP006 HEPG2 24H-QL-X-138-10      | 9/127   | $9.91 \times 10^{-7}$  | $2.45 \times 10^{-5}$ |
| LJP006 HME1 3H-QL-X-138-0.37      | 6/48    | $2.47 \times 10^{-6}$  | $5.22 \times 10^{-5}$ |
| LJP006 A375 24H-QL-X-138-1.11     | 6/50    | $3.16 \times 10^{-6}$  | $6.37 \times 10^{-5}$ |
| LJP006 HEPG2 24H-QL-X-138-1.11    | 6/51    | $3.55 \times 10^{-6}$  | $7.02 \times 10^{-5}$ |
| LJP006 MCF10A 3H-QL-X-138-1.11    | 5/30    | $4.09 \times 10^{-6}$  | $7.86 \times 10^{-5}$ |
| LJP006 A375 24H-QL-X-138-10       | 9/164   | $8.19 \times 10^{-6}$  | $1.41 \times 10^{-4}$ |
| LJP006 HEPG2 24H-QL-X-138-3.33    | 7/92    | $1.03 \times 10^{-5}$  | $1.69 \times 10^{-4}$ |
| LJP006 MCF7 24H-QL-X-138-3.33     | 6/65    | $1.48 \times 10^{-5}$  | $2.30 \times 10^{-4}$ |
| LJP006 A549 24H-QL-X-138-10       | 8/149   | $3.08 \times 10^{-5}$  | $4.31 \times 10^{-4}$ |
| LJP006 HT29 24H-QL-X-138-10       | 5/46    | $3.54 \times 10^{-5}$  | $4.83 \times 10^{-4}$ |
| LJP006 HCC515 24H-QL-X-138-3.33   | 5/53    | $7.07 \times 10^{-5}$  | $8.57 \times 10^{-4}$ |
| LJP006 HS578T 24H-QL-X-138-0.37   | 5/54    | $7.75 \times 10^{-5}$  | $9.27 \times 10^{-4}$ |
| LJP006 HME1 3H-QL-X-138-10        | 6/90    | $9.46 \times 10^{-5}$  | $1.10 \times 10^{-3}$ |
| LJP006 SKBR3 24H-QL-X-138-0.37    | 5/62    | $1.50 \times 10^{-4}$  | $1.61 \times 10^{-3}$ |
| LJP006 HME1 24H-QL-X-138-10       | 8/189   | $1.64 \times 10^{-4}$  | $1.72 \times 10^{-3}$ |
| LJP006 LNCAP 24H-QL-X-138-3.33    | 5/65    | $1.88 \times 10^{-4}$  | $1.93 \times 10^{-3}$ |
| LJP006 MCF7 24H-QL-X-138-0.12     | 4/42    | $3.74 \times 10^{-4}$  | $3.44 \times 10^{-3}$ |
| LJP006 MCF10A 3H-QL-X-138-0.37    | 4/46    | $5.31 \times 10^{-4}$  | $4.63 \times 10^{-3}$ |
| LJP006 SKBR3 24H-QL-X-138-1.11    | 5/83    | $5.88 \times 10^{-4}$  | $5.02 \times 10^{-3}$ |
| LJP006 PC3 24H-QL-X-138-10        | 7/186   | $8.46 \times 10^{-4}$  | $6.83 \times 10^{-3}$ |
| LJP006 MDAMB231 3H-QL-X-138-10    | 4/54    | $9.79 \times 10^{-4}$  | $7.68 \times 10^{-3}$ |
| LJP006 PC3 24H-QL-X-138-1.11      | 4/55    | $1.05 \times 10^{-3}$  | $8.14 \times 10^{-3}$ |
| LJP006 MDAMB231 24H-QL-X-138-3.33 | 3/25    | $1.07 \times 10^{-3}$  | $8.26 \times 10^{-3}$ |
| LJP006 HS578T 24H-QL-X-138-0.12   | 4/56    | $1.12 \times 10^{-3}$  | $8.58 \times 10^{-3}$ |
| LJP006 A375 24H-QL-X-138-3.33     | 5/97    | $1.19 \times 10^{-3}$  | $9.04 \times 10^{-3}$ |
| LJP006 HS578T 24H-QL-X-138-1.11   | 4/58    | $1.28 \times 10^{-3}$  | $9.54 \times 10^{-3}$ |
| LJP006 MCF7 24H-QL-X-138-1.11     | 4/59    | $1.37 \times 10^{-3}$  | $1.00 \times 10^{-2}$ |
| LJP006 MCF7 24H-QL-X-138-10       | 5/101   | $1.43 \times 10^{-3}$  | $1.04 \times 10^{-2}$ |
| LJP006 SKBR3 24H-QL-X-138-10      | 6/173   | $2.98 \times 10^{-3}$  | $1.91 \times 10^{-2}$ |
| LJP006 BT20 24H-QL-X-138-10       | 6/177   | $3.34 \times 10^{-3}$  | $2.10 \times 10^{-2}$ |
| LJP006 PC3 24H-QL-X-138-0.37      | 3/37    | $3.37 \times 10^{-3}$  | $2.11 \times 10^{-2}$ |
| LJP006 HS578T 3H-QL-X-138-10      | 4/77    | $3.63 \times 10^{-3}$  | $2.24 \times 10^{-2}$ |
| LJP006 MCF10A 24H-QL-X-138-10     | 6/188   | $4.48 \times 10^{-3}$  | $2.65 \times 10^{-2}$ |
| LJP006 HS578T 3H-QL-X-138-3.33    | 3/42    | $4.83 \times 10^{-3}$  | $2.79 \times 10^{-2}$ |
| LJP006 LNCAP 24H-QL-X-138-1.11    | 3/44    | $5.51 \times 10^{-3}$  | $3.09 \times 10^{-2}$ |
| LJP006 BT20 24H-QL-X-138-3.33     | 4/91    | $6.56 \times 10^{-3}$  | $3.54 \times 10^{-2}$ |
| LJP006 MCF7 3H-QL-X-138-10        | 3/51    | $8.31 \times 10^{-3}$  | $4.25 \times 10^{-2}$ |
