# Supplementary material for: A new advanced in silico drug discovery method for novel coronavirus (SARS-CoV-2) with tensor decomposition-based unsupervised feature extraction
Source: PubMed Central journal article supplement (PMC7485840; doi:10.1371/journal.pone.0238907), 2020-09-11
Supplement: pone.0238907.s011.pdf [file pone.0238907.s011.pdf]

S11 Table: QL-X-138 significantly affects the expression of the selected 163 genes as evident in the “LINCS L1000 Chem Pert down” category in Enrichr. The last number after the - is dose density.

| Term                              | Overlap | P-value                | Adjusted P-value       |
|-----------------------------------|---------|------------------------|------------------------|
| LINCS L1000 Chem Pert down        |         |                        |                        |
| LJP006 HA1E 24H-QL-X-138-10       | 33/219  | $1.76 \times 10^{-32}$ | $5.84 \times 10^{-28}$ |
| LJP006 HA1E 24H-QL-X-138-3.33     | 21/201  | $1.62 \times 10^{-17}$ | $4.47 \times 10^{-14}$ |
| LJP006 HS578T 24H-QL-X-138-10     | 22/230  | $1.77 \times 10^{-17}$ | $4.51 \times 10^{-14}$ |
| LJP006 BT20 24H-QL-X-138-10       | 19/157  | $3.74 \times 10^{-17}$ | $7.29 \times 10^{-14}$ |
| LJP006 HS578T 24H-QL-X-138-3.33   | 13/97   | $1.11 \times 10^{-12}$ | $2.86 \times 10^{-10}$ |
| LJP006 HA1E 24H-QL-X-138-0.37     | 11/60   | $1.82 \times 10^{-12}$ | $4.22 \times 10^{-10}$ |
| LJP006 HA1E 24H-QL-X-138-1.11     | 13/101  | $1.89 \times 10^{-12}$ | $4.27 \times 10^{-10}$ |
| LJP006 SKBR3 24H-QL-X-138-10      | 15/153  | $2.04 \times 10^{-12}$ | $4.53 \times 10^{-10}$ |
| LJP006 HME1 24H-QL-X-138-10       | 14/149  | $2.04 \times 10^{-11}$ | $2.81 \times 10^{-9}$  |
| LJP006 BT20 24H-QL-X-138-3.33     | 10/71   | $2.95 \times 10^{-10}$ | $2.58 \times 10^{-8}$  |
| LJP006 HCC515 24H-QL-X-138-10     | 11/124  | $5.74 \times 10^{-9}$  | $3.04 \times 10^{-7}$  |
| LJP006 HEPG2 24H-QL-X-138-10      | 12/176  | $2.27 \times 10^{-8}$  | $9.40 \times 10^{-7}$  |
| LJP006 BT20 24H-QL-X-138-1.11     | 9/98    | $1.08 \times 10^{-7}$  | $3.57 \times 10^{-6}$  |
| LJP006 MDAMB231 24H-QL-X-138-3.33 | 6/29    | $1.09 \times 10^{-7}$  | $3.60 \times 10^{-6}$  |
| LJP006 PC3 24H-QL-X-138-10        | 10/148  | $3.80 \times 10^{-7}$  | $1.02 \times 10^{-5}$  |
| LJP006 HS578T 3H-QL-X-138-10      | 7/68    | $1.34 \times 10^{-6}$  | $2.95 \times 10^{-5}$  |
| LJP006 A549 24H-QL-X-138-10       | 9/136   | $1.76 \times 10^{-6}$  | $3.71 \times 10^{-5}$  |
| LJP006 LNCAP 24H-QL-X-138-1.11    | 8/105   | $2.34 \times 10^{-6}$  | $4.73 \times 10^{-5}$  |
| LJP006 HS578T 24H-QL-X-138-0.37   | 6/52    | $3.99 \times 10^{-6}$  | $7.40 \times 10^{-5}$  |
| LJP006 HME1 24H-QL-X-138-3.33     | 8/117   | $5.26 \times 10^{-6}$  | $9.38 \times 10^{-5}$  |
| LJP006 A375 24H-QL-X-138-3.33     | 8/118   | $5.61 \times 10^{-6}$  | $9.92 \times 10^{-5}$  |
| LJP006 HME1 3H-QL-X-138-3.33      | 6/56    | $6.19 \times 10^{-6}$  | $1.07 \times 10^{-4}$  |
| LJP006 LNCAP 24H-QL-X-138-3.33    | 8/121   | $6.76 \times 10^{-6}$  | $1.16 \times 10^{-4}$  |
| LJP006 MCF7 24H-QL-X-138-1.11     | 5/35    | $9.01 \times 10^{-6}$  | $1.48 \times 10^{-4}$  |
| LJP006 HME1 24H-QL-X-138-1.11     | 7/92    | $1.03 \times 10^{-5}$  | $1.66 \times 10^{-4}$  |
| LJP006 SKBR3 24H-QL-X-138-0.12    | 5/38    | $1.37 \times 10^{-5}$  | $2.10 \times 10^{-4}$  |
| LJP006 HA1E 24H-QL-X-138-0.12     | 5/40    | $1.77 \times 10^{-5}$  | $2.63 \times 10^{-4}$  |
| LJP006 HT29 24H-QL-X-138-10       | 5/40    | $1.77 \times 10^{-5}$  | $2.63 \times 10^{-4}$  |
| LJP006 MCF7 24H-QL-X-138-0.12     | 6/77    | $3.93 \times 10^{-5}$  | $5.20 \times 10^{-4}$  |
| LJP006 SKBR3 24H-QL-X-138-1.11    | 6/81    | $5.24 \times 10^{-5}$  | $6.60 \times 10^{-4}$  |
| LJP006 BT20 3H-QL-X-138-3.33      | 4/29    | $8.61 \times 10^{-5}$  | $9.96 \times 10^{-4}$  |
| LJP006 A375 24H-QL-X-138-10       | 8/176   | $1.00 \times 10^{-4}$  | $1.13 \times 10^{-3}$  |
| LJP006 MCF10A 24H-QL-X-138-10     | 7/133   | $1.11 \times 10^{-4}$  | $1.22 \times 10^{-3}$  |
| LJP006 BT20 3H-QL-X-138-10        | 4/35    | $1.83 \times 10^{-4}$  | $1.87 \times 10^{-3}$  |
| LJP006 HS578T 24H-QL-X-138-1.11   | 5/68    | $2.33 \times 10^{-4}$  | $2.30 \times 10^{-3}$  |
| LJP006 MCF7 24H-QL-X-138-10       | 5/82    | $5.56 \times 10^{-4}$  | $4.77 \times 10^{-3}$  |
| LJP006 SKBR3 3H-QL-X-138-1.11     | 3/22    | $7.30 \times 10^{-4}$  | $6.00 \times 10^{-3}$  |
| LJP006 PC3 24H-QL-X-138-0.12      | 3/23    | $8.35 \times 10^{-4}$  | $6.72 \times 10^{-3}$  |
| LJP006 SKBR3 3H-QL-X-138-0.37     | 3/25    | $1.07 \times 10^{-3}$  | $8.25 \times 10^{-3}$  |
| LJP006 MCF7 24H-QL-X-138-0.37     | 3/28    | $1.50 \times 10^{-3}$  | $1.09 \times 10^{-2}$  |
| LJP006 HME1 3H-QL-X-138-0.37      | 3/32    | $2.22 \times 10^{-3}$  | $1.51 \times 10^{-2}$  |
| LJP006 SKBR3 24H-QL-X-138-0.37    | 4/68    | $2.31 \times 10^{-3}$  | $1.56 \times 10^{-2}$  |
| LJP006 A375 24H-QL-X-138-1.11     | 3/34    | $2.64 \times 10^{-3}$  | $1.75 \times 10^{-2}$  |
| LJP006 BT20 24H-QL-X-138-0.37     | 3/36    | $3.11 \times 10^{-3}$  | $2.01 \times 10^{-2}$  |
| LJP006 PC3 24H-QL-X-138-0.37      | 3/39    | $3.92 \times 10^{-3}$  | $2.40 \times 10^{-2}$  |
| LJP006 MCF7 24H-QL-X-138-3.33     | 3/42    | $4.83 \times 10^{-3}$  | $2.84 \times 10^{-2}$  |
| LJP006 SKBR3 3H-QL-X-138-3.33     | 3/45    | $5.87 \times 10^{-3}$  | $3.31 \times 10^{-2}$  |
| LJP006 BT20 3H-QL-X-138-0.37      | 2/15    | $6.47 \times 10^{-3}$  | $3.57 \times 10^{-2}$  |
| LJP006 SKBR3 24H-QL-X-138-3.33    | 5/144   | $6.56 \times 10^{-3}$  | $3.62 \times 10^{-2}$  |
| LJP006 PC3 24H-QL-X-138-3.33      | 3/48    | $7.03 \times 10^{-3}$  | $3.82 \times 10^{-2}$  |
