# Supplementary material for: A new advanced in silico drug discovery method for novel coronavirus (SARS-CoV-2) with tensor decomposition-based unsupervised feature extraction
Source: PubMed Central journal article supplement (PMC7485840; doi:10.1371/journal.pone.0238907), 2020-09-11
Supplement: pone.0238907.s012.pdf [file pone.0238907.s012.pdf]

S12 Table: Radicicol significantly affects the expression of the selected 163 genes due to “LINCS L1000 Chem Pert up” category in Enrichr. The last number after the - is dose density.

| Term                               | Overlap | P-value                | Adjusted P-value       |
|------------------------------------|---------|------------------------|------------------------|
| LINCS L1000 Chem Pert up           |         |                        |                        |
| LJP006 MCF7 24H-radicicol-10       | 17/149  | $5.02 \times 10^{-15}$ | $3.39 \times 10^{-12}$ |
| LJP006 SKBR3 3H-radicicol-10       | 13/74   | $2.94 \times 10^{-14}$ | $1.33 \times 10^{-11}$ |
| LJP006 MCF7 24H-radicicol-3.33     | 15/123  | $7.94 \times 10^{-14}$ | $3.09 \times 10^{-11}$ |
| LJP005 HS578T 3H-radicicol-10      | 10/50   | $7.59 \times 10^{-12}$ | $1.43 \times 10^{-9}$  |
| LJP005 MCF10A 24H-radicicol-3.33   | 15/184  | $2.95 \times 10^{-11}$ | $4.18 \times 10^{-9}$  |
| LJP005 MCF7 24H-radicicol-1.11     | 12/109  | $9.04 \times 10^{-11}$ | $1.05 \times 10^{-8}$  |
| LJP005 HA1E 24H-radicicol-3.33     | 11/87   | $1.23 \times 10^{-10}$ | $1.34 \times 10^{-8}$  |
| LJP006 MCF7 24H-radicicol-1.11     | 11/87   | $1.23 \times 10^{-10}$ | $1.33 \times 10^{-8}$  |
| LJP006 HME1 3H-radicicol-3.33      | 11/92   | $2.28 \times 10^{-10}$ | $2.20 \times 10^{-8}$  |
| LJP006 HME1 24H-radicicol-3.33     | 13/147  | $2.34 \times 10^{-10}$ | $2.24 \times 10^{-8}$  |
| LJP006 HEPG2 24H-radicicol-10      | 14/179  | $2.40 \times 10^{-10}$ | $2.29 \times 10^{-8}$  |
| LJP006 BT20 24H-radicicol-10       | 14/180  | $2.59 \times 10^{-10}$ | $2.43 \times 10^{-8}$  |
| LJP005 BT20 3H-radicicol-10        | 10/71   | $2.95 \times 10^{-10}$ | $2.74 \times 10^{-8}$  |
| LJP005 SKBR3 3H-radicicol-10       | 10/71   | $2.95 \times 10^{-10}$ | $2.74 \times 10^{-8}$  |
| LJP005 MCF10A 3H-radicicol-3.33    | 11/97   | $4.08 \times 10^{-10}$ | $3.56 \times 10^{-8}$  |
| LJP005 MCF7 24H-radicicol-10       | 13/159  | $6.23 \times 10^{-10}$ | $5.11 \times 10^{-8}$  |
| LJP005 SKBR3 24H-radicicol-10      | 13/163  | $8.48 \times 10^{-10}$ | $6.58 \times 10^{-8}$  |
| LJP005 MCF7 24H-radicicol-3.33     | 12/133  | $9.36 \times 10^{-10}$ | $7.16 \times 10^{-8}$  |
| LJP005 SKBR3 3H-radicicol-0.04     | 7/26    | $1.21 \times 10^{-9}$  | $8.61 \times 10^{-8}$  |
| LJP005 HEPG2 24H-radicicol-1.11    | 11/112  | $1.94 \times 10^{-9}$  | $1.27 \times 10^{-7}$  |
| LJP005 MCF7 3H-radicicol-0.12      | 9/66    | $3.16 \times 10^{-9}$  | $1.90 \times 10^{-7}$  |
| LJP005 MCF10A 24H-radicicol-10     | 14/219  | $3.37 \times 10^{-9}$  | $2.00 \times 10^{-7}$  |
| LJP005 MCF10A 3H-radicicol-10      | 10/97   | $6.70 \times 10^{-9}$  | $3.67 \times 10^{-7}$  |
| LJP005 MDAMB231 24H-radicicol-3.33 | 9/73    | $7.90 \times 10^{-9}$  | $4.23 \times 10^{-7}$  |
| LJP006 HCC515 24H-radicicol-10     | 10/99   | $8.19 \times 10^{-9}$  | $4.35 \times 10^{-7}$  |
| LJP006 HA1E 24H-radicicol-3.33     | 10/100  | $9.03 \times 10^{-9}$  | $4.75 \times 10^{-7}$  |
| LJP006 SKBR3 24H-radicicol-10      | 13/203  | $1.23 \times 10^{-8}$  | $6.08 \times 10^{-7}$  |
| LJP005 A375 24H-radicicol-3.33     | 10/104  | $1.32 \times 10^{-8}$  | $6.46 \times 10^{-7}$  |
| LJP005 SKBR3 3H-radicicol-1.11     | 7/37    | $1.76 \times 10^{-8}$  | $8.22 \times 10^{-7}$  |
| LJP006 HME1 24H-radicicol-0.37     | 11/145  | $2.97 \times 10^{-8}$  | $1.27 \times 10^{-6}$  |
| LJP006 LNCAP 3H-radicicol-0.04     | 7/40    | $3.12 \times 10^{-8}$  | $1.33 \times 10^{-6}$  |
| LJP006 MCF10A 24H-radicicol-0.37   | 12/186  | $4.19 \times 10^{-8}$  | $1.70 \times 10^{-6}$  |
| LJP005 BT20 3H-radicicol-1.11      | 8/65    | $5.57 \times 10^{-8}$  | $2.20 \times 10^{-6}$  |
| LJP006 BT20 3H-radicicol-10        | 7/45    | $7.34 \times 10^{-8}$  | $2.78 \times 10^{-6}$  |
| LJP006 LNCAP 24H-radicicol-10      | 10/131  | $1.21 \times 10^{-7}$  | $4.24 \times 10^{-6}$  |
| LJP005 PC3 24H-radicicol-10        | 8/72    | $1.26 \times 10^{-7}$  | $4.38 \times 10^{-6}$  |
| LJP005 HS578T 24H-radicicol-1.11   | 7/49    | $1.35 \times 10^{-7}$  | $4.66 \times 10^{-6}$  |
| LJP005 HCC515 24H-radicicol-10     | 9/101   | $1.40 \times 10^{-7}$  | $4.79 \times 10^{-6}$  |
| LJP005 HEPG2 24H-radicicol-3.33    | 10/133  | $1.40 \times 10^{-7}$  | $4.78 \times 10^{-6}$  |
| LJP006 PC3 24H-radicicol-10        | 10/139  | $2.12 \times 10^{-7}$  | $6.73 \times 10^{-6}$  |
| LJP005 HA1E 24H-radicicol-10       | 11/177  | $2.29 \times 10^{-7}$  | $7.18 \times 10^{-6}$  |
| LJP006 MCF10A 24H-radicicol-3.33   | 11/178  | $2.42 \times 10^{-7}$  | $7.51 \times 10^{-6}$  |
| LJP005 BT20 3H-radicicol-0.04      | 5/18    | $2.66 \times 10^{-7}$  | $8.17 \times 10^{-6}$  |
| LJP006 MCF10A 3H-radicicol-0.37    | 7/57    | $3.94 \times 10^{-7}$  | $1.13 \times 10^{-5}$  |
| LJP006 MCF7 3H-radicicol-3.33      | 6/37    | $5.04 \times 10^{-7}$  | $1.39 \times 10^{-5}$  |
| LJP006 SKBR3 3H-radicicol-3.33     | 8/87    | $5.54 \times 10^{-7}$  | $1.52 \times 10^{-5}$  |
| LJP006 HEPG2 24H-radicicol-3.33    | 8/90    | $7.20 \times 10^{-7}$  | $1.89 \times 10^{-5}$  |
| LJP006 MCF10A 24H-radicicol-0.12   | 9/123   | $7.57 \times 10^{-7}$  | $1.97 \times 10^{-5}$  |
| LJP005 MCF10A 24H-radicicol-1.11   | 11/202  | $8.54 \times 10^{-7}$  | $2.17 \times 10^{-5}$  |
| LJP005 HCC515 24H-radicicol-3.33   | 7/64    | $8.83 \times 10^{-7}$  | $2.23 \times 10^{-5}$  |
| LJP006 HCC515 24H-radicicol-1.11   | 8/93    | $9.27 \times 10^{-7}$  | $2.33 \times 10^{-5}$  |
| LJP005 MCF10A 3H-radicicol-0.04    | 6/42    | $1.10 \times 10^{-6}$  | $2.66 \times 10^{-5}$  |
| LJP006 LNCAP 24H-radicicol-3.33    | 8/96    | $1.18 \times 10^{-6}$  | $2.84 \times 10^{-5}$  |

S12 Table: (Continued)

|                                    |        |                       |                       |
|------------------------------------|--------|-----------------------|-----------------------|
| LJP005 SKBR3 3H-radicicol-3.33     | 7/67   | $1.21 \times 10^{-6}$ | $2.89 \times 10^{-5}$ |
| LJP005 PC3 24H-radicicol-0.37      | 6/43   | $1.27 \times 10^{-6}$ | $3.02 \times 10^{-5}$ |
| LJP006 MCF10A 24H-radicicol-10     | 11/212 | $1.37 \times 10^{-6}$ | $3.21 \times 10^{-5}$ |
| LJP005 SKBR3 24H-radicicol-3.33    | 9/133  | $1.46 \times 10^{-6}$ | $3.40 \times 10^{-5}$ |
| LJP005 HEPG2 24H-radicicol-10      | 10/177 | $1.96 \times 10^{-6}$ | $4.30 \times 10^{-5}$ |
| LJP006 A375 24H-radicicol-3.33     | 7/74   | $2.39 \times 10^{-6}$ | $5.08 \times 10^{-5}$ |
| LJP006 HS578T 3H-radicicol-1.11    | 6/49   | $2.80 \times 10^{-6}$ | $5.81 \times 10^{-5}$ |
| LJP006 SKBR3 24H-radicicol-3.33    | 8/109  | $3.10 \times 10^{-6}$ | $6.32 \times 10^{-5}$ |
| LJP005 BT20 24H-radicicol-1.11     | 6/50   | $3.16 \times 10^{-6}$ | $6.38 \times 10^{-5}$ |
| LJP005 MCF10A 3H-radicicol-1.11    | 6/50   | $3.16 \times 10^{-6}$ | $6.38 \times 10^{-5}$ |
| LJP006 MCF10A 3H-radicicol-10      | 8/110  | $3.32 \times 10^{-6}$ | $6.65 \times 10^{-5}$ |
| LJP005 MCF10A 24H-radicicol-0.12   | 8/111  | $3.55 \times 10^{-6}$ | $7.06 \times 10^{-5}$ |
| LJP006 MCF7 24H-radicicol-0.37     | 6/51   | $3.55 \times 10^{-6}$ | $7.02 \times 10^{-5}$ |
| LJP006 HA1E 24H-radicicol-0.37     | 7/79   | $3.72 \times 10^{-6}$ | $7.30 \times 10^{-5}$ |
| LJP006 PC3 24H-radicicol-0.37      | 5/31   | $4.84 \times 10^{-6}$ | $9.15 \times 10^{-5}$ |
| LJP006 HME1 3H-radicicol-10        | 8/119  | $5.97 \times 10^{-6}$ | $1.09 \times 10^{-4}$ |
| LJP006 HME1 3H-radicicol-1.11      | 7/86   | $6.57 \times 10^{-6}$ | $1.18 \times 10^{-4}$ |
| LJP006 MCF10A 24H-radicicol-1.11   | 10/204 | $6.95 \times 10^{-6}$ | $1.24 \times 10^{-4}$ |
| LJP006 HS578T 24H-radicicol-3.33   | 8/123  | $7.63 \times 10^{-6}$ | $1.33 \times 10^{-4}$ |
| LJP005 MDAMB231 3H-radicicol-0.12  | 5/35   | $9.01 \times 10^{-6}$ | $1.53 \times 10^{-4}$ |
| LJP006 MCF10A 3H-radicicol-0.12    | 6/60   | $9.30 \times 10^{-6}$ | $1.57 \times 10^{-4}$ |
| LJP005 HA1E 24H-radicicol-0.37     | 6/64   | $1.36 \times 10^{-5}$ | $2.15 \times 10^{-4}$ |
| LJP006 MDAMB231 24H-radicicol-10   | 7/96   | $1.36 \times 10^{-5}$ | $2.14 \times 10^{-4}$ |
| LJP006 HME1 3H-radicicol-0.04      | 4/19   | $1.50 \times 10^{-5}$ | $2.32 \times 10^{-4}$ |
| LJP006 MCF7 3H-radicicol-0.12      | 4/19   | $1.50 \times 10^{-5}$ | $2.32 \times 10^{-4}$ |
| LJP005 MDAMB231 24H-radicicol-10   | 5/40   | $1.77 \times 10^{-5}$ | $2.67 \times 10^{-4}$ |
| LJP006 HME1 3H-radicicol-0.12      | 5/41   | $2.00 \times 10^{-5}$ | $2.95 \times 10^{-4}$ |
| LJP005 SKBR3 24H-radicicol-0.12    | 6/70   | $2.28 \times 10^{-5}$ | $3.31 \times 10^{-4}$ |
| LJP005 MDAMB231 3H-radicicol-1.11  | 5/43   | $2.53 \times 10^{-5}$ | $3.63 \times 10^{-4}$ |
| LJP005 HT29 24H-radicicol-10       | 6/72   | $2.68 \times 10^{-5}$ | $3.80 \times 10^{-4}$ |
| LJP006 HME1 24H-radicicol-0.12     | 7/111  | $3.50 \times 10^{-5}$ | $4.80 \times 10^{-4}$ |
| LJP006 LNCAP 3H-radicicol-3.33     | 5/46   | $3.54 \times 10^{-5}$ | $4.83 \times 10^{-4}$ |
| LJP006 SKBR3 3H-radicicol-0.04     | 4/24   | $3.98 \times 10^{-5}$ | $5.32 \times 10^{-4}$ |
| LJP006 MCF7 3H-radicicol-10        | 5/48   | $4.36 \times 10^{-5}$ | $5.77 \times 10^{-4}$ |
| LJP006 HCC515 24H-radicicol-3.33   | 6/79   | $4.54 \times 10^{-5}$ | $5.97 \times 10^{-4}$ |
| LJP006 MCF10A 3H-radicicol-3.33    | 6/79   | $4.54 \times 10^{-5}$ | $5.97 \times 10^{-4}$ |
| LJP005 BT20 24H-radicicol-10       | 9/204  | $4.63 \times 10^{-5}$ | $6.06 \times 10^{-4}$ |
| LJP006 PC3 24H-radicicol-0.12      | 4/25   | $4.71 \times 10^{-5}$ | $6.14 \times 10^{-4}$ |
| LJP005 SKBR3 24H-radicicol-0.37    | 7/119  | $5.47 \times 10^{-5}$ | $6.99 \times 10^{-4}$ |
| LJP005 MCF10A 24H-radicicol-0.37   | 8/162  | $5.59 \times 10^{-5}$ | $7.11 \times 10^{-4}$ |
| LJP005 SKBR3 3H-radicicol-0.37     | 5/53   | $7.07 \times 10^{-5}$ | $8.58 \times 10^{-4}$ |
| LJP006 MDAMB231 3H-radicicol-1.11  | 4/29   | $8.61 \times 10^{-5}$ | $1.01 \times 10^{-3}$ |
| LJP006 SKBR3 24H-radicicol-0.37    | 6/90   | $9.46 \times 10^{-5}$ | $1.10 \times 10^{-3}$ |
| LJP005 BT20 24H-radicicol-3.33     | 6/92   | $1.07 \times 10^{-4}$ | $1.21 \times 10^{-3}$ |
| LJP006 LNCAP 3H-radicicol-0.37     | 4/32   | $1.28 \times 10^{-4}$ | $1.40 \times 10^{-3}$ |
| LJP006 HT29 24H-radicicol-10       | 5/60   | $1.29 \times 10^{-4}$ | $1.41 \times 10^{-3}$ |
| LJP006 A549 24H-radicicol-0.37     | 4/33   | $1.45 \times 10^{-4}$ | $1.56 \times 10^{-3}$ |
| LJP006 HME1 3H-radicicol-0.37      | 5/63   | $1.62 \times 10^{-4}$ | $1.71 \times 10^{-3}$ |
| LJP006 SKBR3 24H-radicicol-1.11    | 6/100  | $1.69 \times 10^{-4}$ | $1.77 \times 10^{-3}$ |
| LJP005 HCC515 24H-radicicol-1.11   | 5/64   | $1.75 \times 10^{-4}$ | $1.82 \times 10^{-3}$ |
| LJP006 HA1E 24H-radicicol-10       | 9/248  | $2.05 \times 10^{-4}$ | $2.06 \times 10^{-3}$ |
| LJP006 LNCAP 3H-radicicol-0.12     | 4/37   | $2.28 \times 10^{-4}$ | $2.27 \times 10^{-3}$ |
| LJP006 MDAMB231 3H-radicicol-10    | 4/39   | $2.80 \times 10^{-4}$ | $2.71 \times 10^{-3}$ |
| LJP006 BT20 24H-radicicol-3.33     | 7/155  | $2.84 \times 10^{-4}$ | $2.74 \times 10^{-3}$ |
| LJP006 MDAMB231 24H-radicicol-3.33 | 5/72   | $3.05 \times 10^{-4}$ | $2.90 \times 10^{-3}$ |
| LJP005 MCF10A 3H-radicicol-0.37    | 4/40   | $3.09 \times 10^{-4}$ | $2.94 \times 10^{-3}$ |

S12 Table: (Continued)

|                                    |       |                       |                       |
|------------------------------------|-------|-----------------------|-----------------------|
| LJP005 HS578T 3H-radicicol-1.11    | 4/41  | $3.40 \times 10^{-4}$ | $3.20 \times 10^{-3}$ |
| LJP005 SKBR3 3H-radicicol-0.12     | 4/41  | $3.40 \times 10^{-4}$ | $3.19 \times 10^{-3}$ |
| LJP006 BT20 24H-radicicol-0.12     | 4/42  | $3.74 \times 10^{-4}$ | $3.44 \times 10^{-3}$ |
| LJP006 BT20 24H-radicicol-1.11     | 6/119 | $4.34 \times 10^{-4}$ | $3.91 \times 10^{-3}$ |
| LJP006 MCF7 24H-radicicol-0.12     | 4/44  | $4.48 \times 10^{-4}$ | $4.00 \times 10^{-3}$ |
| LJP006 PC3 24H-radicicol-3.33      | 5/80  | $4.97 \times 10^{-4}$ | $4.36 \times 10^{-3}$ |
| LJP006 PC3 24H-radicicol-1.11      | 4/47  | $5.77 \times 10^{-4}$ | $4.95 \times 10^{-3}$ |
| LJP005 A375 24H-radicicol-1.11     | 5/84  | $6.21 \times 10^{-4}$ | $5.28 \times 10^{-3}$ |
| LJP006 HS578T 24H-radicicol-10     | 5/87  | $7.29 \times 10^{-4}$ | $6.05 \times 10^{-3}$ |
| LJP005 BT20 3H-radicicol-0.12      | 3/22  | $7.30 \times 10^{-4}$ | $6.05 \times 10^{-3}$ |
| LJP006 A375 24H-radicicol-10       | 6/132 | $7.51 \times 10^{-4}$ | $6.16 \times 10^{-3}$ |
| LJP005 MCF7 3H-radicicol-0.37      | 4/52  | $8.49 \times 10^{-4}$ | $6.84 \times 10^{-3}$ |
| LJP005 HA1E 24H-radicicol-0.12     | 4/53  | $9.12 \times 10^{-4}$ | $7.26 \times 10^{-3}$ |
| LJP006 SKBR3 3H-radicicol-0.37     | 3/24  | $9.48 \times 10^{-4}$ | $7.49 \times 10^{-3}$ |
| LJP005 BT20 3H-radicicol-3.33      | 4/54  | $9.79 \times 10^{-4}$ | $7.71 \times 10^{-3}$ |
| LJP005 MDAMB231 3H-radicicol-10    | 4/54  | $9.79 \times 10^{-4}$ | $7.69 \times 10^{-3}$ |
| LJP005 MDAMB231 24H-radicicol-0.37 | 3/25  | $1.07 \times 10^{-3}$ | $8.28 \times 10^{-3}$ |
| LJP005 HS578T 24H-radicicol-10     | 5/96  | $1.14 \times 10^{-3}$ | $8.67 \times 10^{-3}$ |
| LJP006 MDAMB231 3H-radicicol-0.04  | 3/26  | $1.20 \times 10^{-3}$ | $9.07 \times 10^{-3}$ |
| LJP005 MCF7 3H-radicicol-10        | 4/61  | $1.55 \times 10^{-3}$ | $1.11 \times 10^{-2}$ |
| LJP005 MDAMB231 3H-radicicol-3.33  | 3/29  | $1.66 \times 10^{-3}$ | $1.18 \times 10^{-2}$ |
| LJP006 HME1 24H-radicicol-1.11     | 5/108 | $1.92 \times 10^{-3}$ | $1.33 \times 10^{-2}$ |
| LJP005 HEPG2 24H-radicicol-0.37    | 4/67  | $2.19 \times 10^{-3}$ | $1.49 \times 10^{-2}$ |
| LJP005 HS578T 3H-radicicol-0.12    | 3/32  | $2.22 \times 10^{-3}$ | $1.50 \times 10^{-2}$ |
| LJP006 MDAMB231 3H-radicicol-0.37  | 3/32  | $2.22 \times 10^{-3}$ | $1.50 \times 10^{-2}$ |
| LJP006 MDAMB231 24H-radicicol-1.11 | 4/68  | $2.31 \times 10^{-3}$ | $1.55 \times 10^{-2}$ |
| LJP005 MDAMB231 24H-radicicol-1.11 | 3/34  | $2.64 \times 10^{-3}$ | $1.74 \times 10^{-2}$ |
| LJP006 HS578T 3H-radicicol-0.12    | 3/34  | $2.64 \times 10^{-3}$ | $1.73 \times 10^{-2}$ |
| LJP005 BT20 24H-radicicol-0.12     | 3/35  | $2.87 \times 10^{-3}$ | $1.86 \times 10^{-2}$ |
| LJP005 HS578T 3H-radicicol-0.04    | 3/39  | $3.92 \times 10^{-3}$ | $2.38 \times 10^{-2}$ |
| LJP006 HS578T 3H-radicicol-3.33    | 3/41  | $4.51 \times 10^{-3}$ | $2.66 \times 10^{-2}$ |
| LJP006 LNCAP 3H-radicicol-1.11     | 3/41  | $4.51 \times 10^{-3}$ | $2.65 \times 10^{-2}$ |
| LJP006 LNCAP 24H-radicicol-1.11    | 4/84  | $4.95 \times 10^{-3}$ | $2.84 \times 10^{-2}$ |
| LJP005 HS578T 3H-radicicol-3.33    | 3/44  | $5.51 \times 10^{-3}$ | $3.09 \times 10^{-2}$ |
| LJP006 HA1E 24H-radicicol-1.11     | 4/88  | $5.83 \times 10^{-3}$ | $3.24 \times 10^{-2}$ |
| LJP006 A375 24H-radicicol-0.37     | 4/89  | $6.07 \times 10^{-3}$ | $3.33 \times 10^{-2}$ |
| LJP005 HA1E 24H-radicicol-1.11     | 4/94  | $7.35 \times 10^{-3}$ | $3.89 \times 10^{-2}$ |
| LJP005 HS578T 24H-radicicol-0.37   | 3/49  | $7.44 \times 10^{-3}$ | $3.92 \times 10^{-2}$ |
| LJP005 MCF7 24H-radicicol-0.37     | 3/49  | $7.44 \times 10^{-3}$ | $3.92 \times 10^{-2}$ |
| LJP006 BT20 24H-radicicol-0.37     | 3/50  | $7.87 \times 10^{-3}$ | $4.10 \times 10^{-2}$ |
| LJP005 HCC515 24H-radicicol-0.37   | 3/53  | $9.24 \times 10^{-3}$ | $4.63 \times 10^{-2}$ |
| LJP006 LNCAP 3H-radicicol-10       | 3/53  | $9.24 \times 10^{-3}$ | $4.62 \times 10^{-2}$ |
| LJP006 HS578T 3H-radicicol-10      | 3/54  | $9.73 \times 10^{-3}$ | $4.82 \times 10^{-2}$ |
