# Supplementary material for: A new advanced in silico drug discovery method for novel coronavirus (SARS-CoV-2) with tensor decomposition-based unsupervised feature extraction
Source: PubMed Central journal article supplement (PMC7485840; doi:10.1371/journal.pone.0238907), 2020-09-11
Supplement: pone.0238907.s013.pdf [file pone.0238907.s013.pdf]

S13 Table: Radicicol significantly affects the expression of the selected 163 genes as evident in the “LINCS L1000 Chem Pert down” category in Enrichr. The last number after the - is dose density.

| Term                               | Overlap | P-value                | Adjusted P-value       |
|------------------------------------|---------|------------------------|------------------------|
| LINCS L1000 Chem Pert down         |         |                        |                        |
| LJP006 HA1E 24H-radicicol-3.33     | 22/160  | $6.04 \times 10^{-21}$ | $1.00 \times 10^{-16}$ |
| LJP005 HS578T 24H-radicicol-10     | 16/109  | $5.56 \times 10^{-16}$ | $6.14 \times 10^{-13}$ |
| LJP005 HS578T 24H-radicicol-3.33   | 15/98   | $2.46 \times 10^{-15}$ | $2.09 \times 10^{-12}$ |
| LJP005 SKBR3 24H-radicicol-0.12    | 11/56   | $8.13 \times 10^{-13}$ | $2.23 \times 10^{-10}$ |
| LJP005 SKBR3 24H-radicicol-0.37    | 13/106  | $3.57 \times 10^{-12}$ | $7.25 \times 10^{-10}$ |
| LJP005 HA1E 24H-radicicol-3.33     | 14/132  | $3.87 \times 10^{-12}$ | $7.68 \times 10^{-10}$ |
| LJP006 A375 24H-radicicol-0.37     | 14/133  | $4.30 \times 10^{-12}$ | $8.23 \times 10^{-10}$ |
| LJP006 MDAMB231 24H-radicicol-10   | 13/108  | $4.55 \times 10^{-12}$ | $8.52 \times 10^{-10}$ |
| LJP006 MCF10A 3H-radicicol-1.11    | 12/95   | $1.74 \times 10^{-11}$ | $2.48 \times 10^{-9}$  |
| LJP006 HS578T 24H-radicicol-10     | 13/128  | $4.07 \times 10^{-11}$ | $5.13 \times 10^{-9}$  |
| LJP006 MCF10A 24H-radicicol-10     | 15/190  | $4.67 \times 10^{-11}$ | $5.75 \times 10^{-9}$  |
| LJP005 MDAMB231 24H-radicicol-3.33 | 12/107  | $7.25 \times 10^{-11}$ | $8.14 \times 10^{-9}$  |
| LJP006 SKBR3 24H-radicicol-0.37    | 12/108  | $8.10 \times 10^{-11}$ | $8.71 \times 10^{-9}$  |
| LJP006 HS578T 24H-radicicol-3.33   | 12/115  | $1.71 \times 10^{-10}$ | $1.61 \times 10^{-8}$  |
| LJP006 HCC515 24H-radicicol-10     | 13/158  | $5.76 \times 10^{-10}$ | $4.45 \times 10^{-8}$  |
| LJP005 PC3 24H-radicicol-1.11      | 9/58    | $9.61 \times 10^{-10}$ | $6.80 \times 10^{-8}$  |
| LJP005 A375 24H-radicicol-1.11     | 12/134  | $1.02 \times 10^{-9}$  | $7.15 \times 10^{-8}$  |
| LJP005 A549 24H-radicicol-10       | 12/142  | $1.99 \times 10^{-9}$  | $1.25 \times 10^{-7}$  |
| LJP005 MCF10A 3H-radicicol-3.33    | 10/90   | $3.20 \times 10^{-9}$  | $1.85 \times 10^{-7}$  |
| LJP006 MCF10A 3H-radicicol-0.12    | 9/71    | $6.14 \times 10^{-9}$  | $3.19 \times 10^{-7}$  |
| LJP006 BT20 24H-radicicol-0.37     | 9/75    | $1.01 \times 10^{-8}$  | $4.86 \times 10^{-7}$  |
| LJP005 SKBR3 24H-radicicol-1.11    | 10/103  | $1.21 \times 10^{-8}$  | $5.66 \times 10^{-7}$  |
| LJP006 SKBR3 24H-radicicol-1.11    | 10/106  | $1.59 \times 10^{-8}$  | $7.07 \times 10^{-7}$  |
| LJP006 SKBR3 24H-radicicol-0.12    | 8/56    | $1.67 \times 10^{-8}$  | $7.35 \times 10^{-7}$  |
| LJP005 MCF10A 3H-radicicol-0.37    | 9/80    | $1.80 \times 10^{-8}$  | $7.82 \times 10^{-7}$  |
| LJP006 HME1 24H-radicicol-3.33     | 12/177  | $2.42 \times 10^{-8}$  | $9.96 \times 10^{-7}$  |
| LJP006 BT20 24H-radicicol-1.11     | 9/86    | $3.42 \times 10^{-8}$  | $1.34 \times 10^{-6}$  |
| LJP006 SKBR3 24H-radicicol-3.33    | 10/122  | $6.17 \times 10^{-8}$  | $2.24 \times 10^{-6}$  |
| LJP006 HS578T 3H-radicicol-0.37    | 7/44    | $6.24 \times 10^{-8}$  | $2.25 \times 10^{-6}$  |
| LJP006 MCF10A 3H-radicicol-3.33    | 9/93    | $6.81 \times 10^{-8}$  | $2.42 \times 10^{-6}$  |
| LJP006 HA1E 24H-radicicol-1.11     | 11/158  | $7.20 \times 10^{-8}$  | $2.53 \times 10^{-6}$  |
| LJP005 PC3 24H-radicicol-0.37      | 7/46    | $8.60 \times 10^{-8}$  | $2.95 \times 10^{-6}$  |
| LJP006 A549 24H-radicicol-10       | 10/131  | $1.21 \times 10^{-7}$  | $3.95 \times 10^{-6}$  |
| LJP006 HME1 24H-radicicol-1.11     | 10/131  | $1.21 \times 10^{-7}$  | $3.94 \times 10^{-6}$  |
| LJP005 MCF10A 24H-radicicol-10     | 12/212  | $1.76 \times 10^{-7}$  | $5.44 \times 10^{-6}$  |
| LJP006 HS578T 24H-radicicol-1.11   | 9/106   | $2.12 \times 10^{-7}$  | $6.37 \times 10^{-6}$  |
| LJP005 BT20 24H-radicicol-0.37     | 7/55    | $3.07 \times 10^{-7}$  | $8.59 \times 10^{-6}$  |
| LJP006 MDAMB231 24H-radicicol-3.33 | 8/82    | $3.50 \times 10^{-7}$  | $9.56 \times 10^{-6}$  |
| LJP005 HA1E 24H-radicicol-1.11     | 10/147  | $3.57 \times 10^{-7}$  | $9.68 \times 10^{-6}$  |
| LJP006 HME1 3H-radicicol-0.37      | 7/57    | $3.94 \times 10^{-7}$  | $1.06 \times 10^{-5}$  |
| LJP006 HA1E 24H-radicicol-10       | 9/114   | $3.97 \times 10^{-7}$  | $1.06 \times 10^{-5}$  |
| LJP005 HCC515 24H-radicicol-10     | 10/154  | $5.49 \times 10^{-7}$  | $1.39 \times 10^{-5}$  |
| LJP006 HS578T 3H-radicicol-3.33    | 6/44    | $1.46 \times 10^{-6}$  | $3.18 \times 10^{-5}$  |
| LJP005 A375 24H-radicicol-0.37     | 8/99    | $1.50 \times 10^{-6}$  | $3.24 \times 10^{-5}$  |
| LJP005 HA1E 24H-radicicol-0.37     | 7/71    | $1.80 \times 10^{-6}$  | $3.79 \times 10^{-5}$  |
| LJP005 MCF10A 3H-radicicol-1.11    | 7/77    | $3.13 \times 10^{-6}$  | $6.01 \times 10^{-5}$  |
| LJP006 BT20 24H-radicicol-3.33     | 8/110   | $3.32 \times 10^{-6}$  | $6.32 \times 10^{-5}$  |
| LJP006 A375 24H-radicicol-0.12     | 7/78    | $3.41 \times 10^{-6}$  | $6.47 \times 10^{-5}$  |
| LJP005 HS578T 3H-radicicol-3.33    | 5/32    | $5.70 \times 10^{-6}$  | $1.00 \times 10^{-4}$  |
| LJP005 MCF10A 3H-radicicol-10      | 7/92    | $1.03 \times 10^{-5}$  | $1.66 \times 10^{-4}$  |
| LJP006 MCF7 3H-radicicol-10        | 5/40    | $1.77 \times 10^{-5}$  | $2.63 \times 10^{-4}$  |
| LJP006 MCF7 24H-radicicol-1.11     | 7/103   | $2.16 \times 10^{-5}$  | $3.12 \times 10^{-4}$  |
| LJP006 MCF10A 3H-radicicol-0.37    | 6/70    | $2.28 \times 10^{-5}$  | $3.26 \times 10^{-4}$  |

S13 Table: (Continued)

|                                    |       |                       |                       |
|------------------------------------|-------|-----------------------|-----------------------|
| LJP005 SKBR3 24H-radicicol-3.33    | 8/144 | $2.41 \times 10^{-5}$ | $3.44 \times 10^{-4}$ |
| LJP005 PC3 24H-radicicol-10        | 7/105 | $2.45 \times 10^{-5}$ | $3.49 \times 10^{-4}$ |
| LJP006 HS578T 3H-radicicol-10      | 6/72  | $2.68 \times 10^{-5}$ | $3.77 \times 10^{-4}$ |
| LJP006 HS578T 3H-radicicol-0.12    | 4/22  | $2.77 \times 10^{-5}$ | $3.88 \times 10^{-4}$ |
| LJP005 HCC515 24H-radicicol-1.11   | 6/75  | $3.38 \times 10^{-5}$ | $4.60 \times 10^{-4}$ |
| LJP006 PC3 24H-radicicol-1.11      | 6/75  | $3.38 \times 10^{-5}$ | $4.58 \times 10^{-4}$ |
| LJP005 MDAMB231 3H-radicicol-3.33  | 4/24  | $3.98 \times 10^{-5}$ | $5.21 \times 10^{-4}$ |
| LJP006 PC3 24H-radicicol-3.33      | 6/78  | $4.23 \times 10^{-5}$ | $5.50 \times 10^{-4}$ |
| LJP005 A375 24H-radicicol-10       | 5/48  | $4.36 \times 10^{-5}$ | $5.66 \times 10^{-4}$ |
| LJP005 MCF10A 3H-radicicol-0.12    | 5/48  | $4.36 \times 10^{-5}$ | $5.66 \times 10^{-4}$ |
| LJP005 HCC515 24H-radicicol-0.37   | 6/80  | $4.88 \times 10^{-5}$ | $6.21 \times 10^{-4}$ |
| LJP006 MCF10A 3H-radicicol-10      | 6/82  | $5.61 \times 10^{-5}$ | $6.99 \times 10^{-4}$ |
| LJP005 HA1E 24H-radicicol-10       | 6/85  | $6.87 \times 10^{-5}$ | $8.30 \times 10^{-4}$ |
| LJP005 SKBR3 3H-radicicol-3.33     | 5/53  | $7.07 \times 10^{-5}$ | $8.49 \times 10^{-4}$ |
| LJP005 HEPG2 24H-radicicol-1.11    | 8/168 | $7.23 \times 10^{-5}$ | $8.63 \times 10^{-4}$ |
| LJP006 HEPG2 24H-radicicol-1.11    | 6/86  | $7.33 \times 10^{-5}$ | $8.74 \times 10^{-4}$ |
| LJP005 MDAMB231 3H-radicicol-10    | 5/54  | $7.75 \times 10^{-5}$ | $9.16 \times 10^{-4}$ |
| LJP006 A375 24H-radicicol-1.11     | 7/132 | $1.05 \times 10^{-4}$ | $1.18 \times 10^{-3}$ |
| LJP006 HME1 24H-radicicol-0.37     | 7/132 | $1.05 \times 10^{-4}$ | $1.18 \times 10^{-3}$ |
| LJP005 BT20 24H-radicicol-0.12     | 5/59  | $1.19 \times 10^{-4}$ | $1.30 \times 10^{-3}$ |
| LJP006 MDAMB231 24H-radicicol-1.11 | 6/97  | $1.43 \times 10^{-4}$ | $1.52 \times 10^{-3}$ |
| LJP006 HCC515 24H-radicicol-3.33   | 6/98  | $1.52 \times 10^{-4}$ | $1.59 \times 10^{-3}$ |
| LJP006 HME1 3H-radicicol-1.11      | 5/64  | $1.75 \times 10^{-4}$ | $1.81 \times 10^{-3}$ |
| LJP005 HS578T 3H-radicicol-10      | 4/35  | $1.83 \times 10^{-4}$ | $1.88 \times 10^{-3}$ |
| LJP005 HS578T 3H-radicicol-1.11    | 4/36  | $2.04 \times 10^{-4}$ | $2.06 \times 10^{-3}$ |
| LJP005 SKBR3 3H-radicicol-0.12     | 5/69  | $2.49 \times 10^{-4}$ | $2.45 \times 10^{-3}$ |
| LJP005 MCF7 24H-radicicol-1.11     | 6/108 | $2.58 \times 10^{-4}$ | $2.51 \times 10^{-3}$ |
| LJP005 SKBR3 24H-radicicol-0.04    | 5/71  | $2.85 \times 10^{-4}$ | $2.73 \times 10^{-3}$ |
| LJP006 HCC515 24H-radicicol-0.37   | 4/40  | $3.09 \times 10^{-4}$ | $2.93 \times 10^{-3}$ |
| LJP006 HS578T 3H-radicicol-1.11    | 4/40  | $3.09 \times 10^{-4}$ | $2.93 \times 10^{-3}$ |
| LJP005 MCF7 24H-radicicol-0.12     | 4/41  | $3.40 \times 10^{-4}$ | $3.17 \times 10^{-3}$ |
| LJP006 BT20 24H-radicicol-0.12     | 4/42  | $3.74 \times 10^{-4}$ | $3.42 \times 10^{-3}$ |
| LJP006 MCF7 24H-radicicol-10       | 8/216 | $4.03 \times 10^{-4}$ | $3.65 \times 10^{-3}$ |
| LJP006 MDAMB231 3H-radicicol-10    | 4/46  | $5.31 \times 10^{-4}$ | $4.59 \times 10^{-3}$ |
| LJP006 SKBR3 3H-radicicol-0.37     | 3/20  | $5.47 \times 10^{-4}$ | $4.71 \times 10^{-3}$ |
| LJP006 HEPG2 24H-radicicol-0.37    | 4/47  | $5.77 \times 10^{-4}$ | $4.92 \times 10^{-3}$ |
| LJP005 MCF10A 24H-radicicol-3.33   | 7/175 | $5.90 \times 10^{-4}$ | $5.00 \times 10^{-3}$ |
| LJP006 BT20 3H-radicicol-10        | 3/21  | $6.35 \times 10^{-4}$ | $5.31 \times 10^{-3}$ |
| LJP006 A549 24H-radicicol-0.12     | 3/23  | $8.35 \times 10^{-4}$ | $6.72 \times 10^{-3}$ |
| LJP005 SKBR3 3H-radicicol-1.11     | 4/52  | $8.49 \times 10^{-4}$ | $6.80 \times 10^{-3}$ |
| LJP006 SKBR3 3H-radicicol-0.12     | 3/25  | $1.07 \times 10^{-3}$ | $8.26 \times 10^{-3}$ |
| LJP006 HCC515 24H-radicicol-1.11   | 5/96  | $1.14 \times 10^{-3}$ | $8.70 \times 10^{-3}$ |
| LJP005 BT20 24H-radicicol-10       | 6/149 | $1.41 \times 10^{-3}$ | $1.04 \times 10^{-2}$ |
| LJP005 BT20 24H-radicicol-3.33     | 4/60  | $1.45 \times 10^{-3}$ | $1.07 \times 10^{-2}$ |
| LJP006 MDAMB231 3H-radicicol-1.11  | 3/29  | $1.66 \times 10^{-3}$ | $1.19 \times 10^{-2}$ |
| LJP005 A375 24H-radicicol-0.12     | 4/65  | $1.96 \times 10^{-3}$ | $1.37 \times 10^{-2}$ |
| LJP006 HA1E 24H-radicicol-0.37     | 4/67  | $2.19 \times 10^{-3}$ | $1.50 \times 10^{-2}$ |
| LJP005 HA1E 24H-radicicol-0.12     | 3/33  | $2.42 \times 10^{-3}$ | $1.63 \times 10^{-2}$ |
| LJP006 A549 24H-radicicol-0.37     | 3/33  | $2.42 \times 10^{-3}$ | $1.63 \times 10^{-2}$ |
| LJP006 HME1 24H-radicicol-10       | 5/114 | $2.43 \times 10^{-3}$ | $1.63 \times 10^{-2}$ |
| LJP006 LNCAP 24H-radicicol-0.37    | 5/119 | $2.93 \times 10^{-3}$ | $1.90 \times 10^{-2}$ |
| LJP006 HME1 3H-radicicol-0.12      | 3/36  | $3.11 \times 10^{-3}$ | $2.00 \times 10^{-2}$ |
| LJP006 MDAMB231 3H-radicicol-3.33  | 3/36  | $3.11 \times 10^{-3}$ | $2.00 \times 10^{-2}$ |
| LJP006 BT20 24H-radicicol-10       | 5/122 | $3.26 \times 10^{-3}$ | $2.08 \times 10^{-2}$ |
| LJP005 PC3 24H-radicicol-3.33      | 4/77  | $3.63 \times 10^{-3}$ | $2.27 \times 10^{-2}$ |

S13 Table: (Continued)

|                                   |       |                       |                       |
|-----------------------------------|-------|-----------------------|-----------------------|
| LJP005 BT20 24H-radicicol-1.11    | 4/78  | $3.80 \times 10^{-3}$ | $2.36 \times 10^{-2}$ |
| LJP005 MDAMB231 24H-radicicol-10  | 3/39  | $3.92 \times 10^{-3}$ | $2.41 \times 10^{-2}$ |
| LJP005 HS578T 24H-radicicol-0.37  | 3/40  | $4.21 \times 10^{-3}$ | $2.55 \times 10^{-2}$ |
| LJP005 HEPG2 24H-radicicol-0.37   | 4/81  | $4.35 \times 10^{-3}$ | $2.62 \times 10^{-2}$ |
| LJP006 LNCAP 3H-radicicol-0.37    | 3/41  | $4.51 \times 10^{-3}$ | $2.70 \times 10^{-2}$ |
| LJP006 HME1 3H-radicicol-10       | 4/85  | $5.16 \times 10^{-3}$ | $3.01 \times 10^{-2}$ |
| LJP005 MDAMB231 3H-radicicol-0.12 | 3/44  | $5.51 \times 10^{-3}$ | $3.16 \times 10^{-2}$ |
| LJP006 MCF10A 3H-radicicol-0.04   | 3/47  | $6.63 \times 10^{-3}$ | $3.64 \times 10^{-2}$ |
| LJP005 SKBR3 3H-radicicol-0.04    | 3/50  | $7.87 \times 10^{-3}$ | $4.18 \times 10^{-2}$ |
| LJP006 SKBR3 24H-radicicol-10     | 5/151 | $7.98 \times 10^{-3}$ | $4.23 \times 10^{-2}$ |
| LJP005 HS578T 3H-radicicol-0.04   | 2/17  | $8.29 \times 10^{-3}$ | $4.37 \times 10^{-2}$ |
| LJP005 MCF7 24H-radicicol-10      | 6/219 | $9.23 \times 10^{-3}$ | $4.76 \times 10^{-2}$ |
| LJP005 HCC515 24H-radicicol-3.33  | 4/101 | $9.42 \times 10^{-3}$ | $4.82 \times 10^{-2}$ |
| LJP006 HME1 24H-radicicol-0.12    | 4/101 | $9.42 \times 10^{-3}$ | $4.81 \times 10^{-2}$ |
