# Supplementary material for: A new advanced in silico drug discovery method for novel coronavirus (SARS-CoV-2) with tensor decomposition-based unsupervised feature extraction
Source: PubMed Central journal article supplement (PMC7485840; doi:10.1371/journal.pone.0238907), 2020-09-11
Supplement: pone.0238907.s014.pdf [file pone.0238907.s014.pdf]

S14 Table: A-443654 significantly affects the expression of the selected 163 genes as evident in the “LINCS L1000 Chem Pert up” category in Enrichr. The last number after the - is dose density.

| Term                            | Overlap | P-value               | Adjusted P-value      |
|---------------------------------|---------|-----------------------|-----------------------|
| LINCS L1000 Chem Pert up        |         |                       |                       |
| LJP006 HCC515 24H-A443654-0.37  | 9/145   | $2.99 \times 10^{-6}$ | $6.13 \times 10^{-5}$ |
| LJP006 HCC515 24H-A443654-0.12  | 7/88    | $7.66 \times 10^{-6}$ | $1.33 \times 10^{-4}$ |
| LJP006 MCF10A 3H-A443654-0.37   | 6/67    | $1.77 \times 10^{-5}$ | $2.66 \times 10^{-4}$ |
| LJP006 PC3 24H-A443654-1.11     | 9/200   | $3.97 \times 10^{-5}$ | $5.32 \times 10^{-4}$ |
| LJP006 HCC515 24H-A443654-10    | 9/203   | $4.45 \times 10^{-5}$ | $5.87 \times 10^{-4}$ |
| LJP006 HS578T 3H-A443654-1.11   | 5/54    | $7.75 \times 10^{-5}$ | $9.27 \times 10^{-4}$ |
| LJP006 HT29 24H-A443654-1.11    | 7/126   | $7.87 \times 10^{-5}$ | $9.36 \times 10^{-4}$ |
| LJP006 MCF7 3H-A443654-0.12     | 6/89    | $8.89 \times 10^{-5}$ | $1.04 \times 10^{-3}$ |
| LJP006 MCF7 3H-A443654-10       | 4/33    | $1.45 \times 10^{-4}$ | $1.56 \times 10^{-3}$ |
| LJP006 MCF7 3H-A443654-3.33     | 5/64    | $1.75 \times 10^{-4}$ | $1.82 \times 10^{-3}$ |
| LJP006 HT29 24H-A443654-0.37    | 4/41    | $3.40 \times 10^{-4}$ | $3.18 \times 10^{-3}$ |
| LJP006 SKBR3 3H-A443654-0.37    | 4/42    | $3.74 \times 10^{-4}$ | $3.44 \times 10^{-3}$ |
| LJP006 MCF7 24H-A443654-0.37    | 6/118   | $4.15 \times 10^{-4}$ | $3.76 \times 10^{-3}$ |
| LJP006 LNCAP 24H-A443654-3.33   | 6/119   | $4.34 \times 10^{-4}$ | $3.91 \times 10^{-3}$ |
| LJP006 A549 24H-A443654-10      | 7/169   | $4.80 \times 10^{-4}$ | $4.24 \times 10^{-3}$ |
| LJP006 MDAMB231 3H-A443654-0.37 | 4/47    | $5.77 \times 10^{-4}$ | $4.95 \times 10^{-3}$ |
| LJP006 PC3 24H-A443654-0.37     | 5/83    | $5.88 \times 10^{-4}$ | $5.02 \times 10^{-3}$ |
| LJP006 MCF7 24H-A443654-0.12    | 5/91    | $8.94 \times 10^{-4}$ | $7.15 \times 10^{-3}$ |
| LJP006 MCF7 24H-A443654-3.33    | 5/92    | $9.40 \times 10^{-4}$ | $7.45 \times 10^{-3}$ |
| LJP006 MCF7 24H-A443654-1.11    | 5/95    | $1.09 \times 10^{-3}$ | $8.35 \times 10^{-3}$ |
| LJP006 BT20 3H-A443654-0.12     | 4/56    | $1.12 \times 10^{-3}$ | $8.59 \times 10^{-3}$ |
| LJP006 A549 24H-A443654-1.11    | 6/150   | $1.46 \times 10^{-3}$ | $1.06 \times 10^{-2}$ |
| LJP006 MDAMB231 3H-A443654-0.12 | 3/30    | $1.84 \times 10^{-3}$ | $1.28 \times 10^{-2}$ |
| LJP006 LNCAP 24H-A443654-0.37   | 5/108   | $1.92 \times 10^{-3}$ | $1.33 \times 10^{-2}$ |
| LJP006 BT20 24H-A443654-0.37    | 6/164   | $2.29 \times 10^{-3}$ | $1.54 \times 10^{-2}$ |
| LJP006 BT20 24H-A443654-1.11    | 5/113   | $2.34 \times 10^{-3}$ | $1.56 \times 10^{-2}$ |
| LJP006 HME1 24H-A443654-0.04    | 4/70    | $2.57 \times 10^{-3}$ | $1.70 \times 10^{-2}$ |
| LJP006 SKBR3 24H-A443654-0.37   | 5/116   | $2.62 \times 10^{-3}$ | $1.73 \times 10^{-2}$ |
| LJP006 BT20 24H-A443654-3.33    | 5/117   | $2.72 \times 10^{-3}$ | $1.77 \times 10^{-2}$ |
| LJP006 SKBR3 24H-A443654-0.04   | 4/74    | $3.14 \times 10^{-3}$ | $1.99 \times 10^{-2}$ |
| LJP006 HEPG2 24H-A443654-0.37   | 4/81    | $4.35 \times 10^{-3}$ | $2.57 \times 10^{-2}$ |
| LJP006 MCF7 3H-A443654-0.37     | 3/42    | $4.83 \times 10^{-3}$ | $2.79 \times 10^{-2}$ |
| LJP006 SKBR3 3H-A443654-3.33    | 3/43    | $5.16 \times 10^{-3}$ | $2.93 \times 10^{-2}$ |
| LJP006 HCC515 24H-A443654-3.33  | 6/211   | $7.76 \times 10^{-3}$ | $4.06 \times 10^{-2}$ |
| LJP006 LNCAP 3H-A443654-10      | 3/50    | $7.87 \times 10^{-3}$ | $4.09 \times 10^{-2}$ |
| LJP006 HT29 24H-A443654-3.33    | 5/155   | $8.87 \times 10^{-3}$ | $4.48 \times 10^{-2}$ |
