# Supplementary material for: A new advanced in silico drug discovery method for novel coronavirus (SARS-CoV-2) with tensor decomposition-based unsupervised feature extraction
Source: PubMed Central journal article supplement (PMC7485840; doi:10.1371/journal.pone.0238907), 2020-09-11
Supplement: pone.0238907.s016.pdf [file pone.0238907.s016.pdf]

S16 Table: CGP-60474 significantly affects the expression of the selected 163 genes due to “LINCS L1000 Chem Pert up” category in Enrichr. The last number after the - is dose density.

| Term                             | Overlap | P-value               | Adjusted P-value      |
|----------------------------------|---------|-----------------------|-----------------------|
| LINCS L1000 Chem Pert up         |         |                       |                       |
| LJP008 HT29 24H-CGP-60474-0.04   | 10/117  | $4.13 \times 10^{-8}$ | $1.70 \times 10^{-6}$ |
| LJP005 MCF7 3H-CGP-60474-10      | 8/69    | $8.98 \times 10^{-8}$ | $3.29 \times 10^{-6}$ |
| LJP006 MCF7 3H-CGP-60474-0.12    | 7/61    | $6.33 \times 10^{-7}$ | $1.69 \times 10^{-5}$ |
| LJP008 PC3 24H-CGP-60474-0.04    | 10/161  | $8.27 \times 10^{-7}$ | $2.11 \times 10^{-5}$ |
| LJP008 MCF7 24H-CGP-60474-10     | 8/94    | $1.01 \times 10^{-6}$ | $2.48 \times 10^{-5}$ |
| LJP005 MCF10A 24H-CGP-60474-0.04 | 6/42    | $1.10 \times 10^{-6}$ | $2.67 \times 10^{-5}$ |
| LJP006 LNCAP 3H-CGP-60474-0.37   | 7/68    | $1.34 \times 10^{-6}$ | $3.14 \times 10^{-5}$ |
| LJP007 HCC515 24H-CGP-60474-0.04 | 9/138   | $1.99 \times 10^{-6}$ | $4.33 \times 10^{-5}$ |
| LJP005 SKBR3 24H-CGP-60474-0.12  | 8/106   | $2.51 \times 10^{-6}$ | $5.28 \times 10^{-5}$ |
| LJP007 HT29 24H-CGP-60474-0.12   | 9/146   | $3.17 \times 10^{-6}$ | $6.38 \times 10^{-5}$ |
| LJP005 SKBR3 24H-CGP-60474-0.37  | 8/115   | $4.63 \times 10^{-6}$ | $8.82 \times 10^{-5}$ |
| LJP009 PC3 24H-CGP-60474-0.04    | 10/198  | $5.34 \times 10^{-6}$ | $9.96 \times 10^{-5}$ |
| LJP006 HCC515 24H-CGP-60474-0.37 | 10/225  | $1.63 \times 10^{-5}$ | $2.49 \times 10^{-4}$ |
| LJP009 MCF7 24H-CGP-60474-0.12   | 8/137   | $1.68 \times 10^{-5}$ | $2.55 \times 10^{-4}$ |
| LJP006 MCF7 3H-CGP-60474-3.33    | 6/67    | $1.77 \times 10^{-5}$ | $2.66 \times 10^{-4}$ |
| LJP007 MCF7 24H-CGP-60474-0.04   | 8/144   | $2.41 \times 10^{-5}$ | $3.48 \times 10^{-4}$ |
| LJP007 PC3 24H-CGP-60474-10      | 7/122   | $6.41 \times 10^{-5}$ | $7.96 \times 10^{-4}$ |
| LJP008 A375 24H-CGP-60474-0.37   | 8/170   | $7.85 \times 10^{-5}$ | $9.36 \times 10^{-4}$ |
| LJP009 MCF7 24H-CGP-60474-10     | 7/126   | $7.87 \times 10^{-5}$ | $9.37 \times 10^{-4}$ |
| LJP005 A549 24H-CGP-60474-0.37   | 8/171   | $8.18 \times 10^{-5}$ | $9.72 \times 10^{-4}$ |
| LJP009 PC3 24H-CGP-60474-1.11    | 9/220   | $8.28 \times 10^{-5}$ | $9.82 \times 10^{-4}$ |
| LJP009 PC3 24H-CGP-60474-10      | 8/176   | $1.00 \times 10^{-4}$ | $1.15 \times 10^{-3}$ |
| LJP009 PC3 24H-CGP-60474-0.12    | 8/176   | $1.00 \times 10^{-4}$ | $1.15 \times 10^{-3}$ |
| LJP007 PC3 24H-CGP-60474-3.33    | 7/131   | $1.01 \times 10^{-4}$ | $1.16 \times 10^{-3}$ |
| LJP005 MCF7 3H-CGP-60474-3.33    | 5/58    | $1.09 \times 10^{-4}$ | $1.24 \times 10^{-3}$ |
| LJP005 PC3 24H-CGP-60474-1.11    | 8/183   | $1.31 \times 10^{-4}$ | $1.43 \times 10^{-3}$ |
| LJP009 HT29 24H-CGP-60474-1.11   | 6/99    | $1.60 \times 10^{-4}$ | $1.70 \times 10^{-3}$ |
| LJP006 A375 24H-CGP-60474-0.37   | 7/144   | $1.81 \times 10^{-4}$ | $1.88 \times 10^{-3}$ |
| LJP006 MCF10A 24H-CGP-60474-10   | 7/148   | $2.14 \times 10^{-4}$ | $2.16 \times 10^{-3}$ |
| LJP006 MCF7 3H-CGP-60474-10      | 5/67    | $2.17 \times 10^{-4}$ | $2.18 \times 10^{-3}$ |
| LJP006 A549 24H-CGP-60474-10     | 7/149   | $2.23 \times 10^{-4}$ | $2.23 \times 10^{-3}$ |
| LJP008 A549 24H-CGP-60474-0.37   | 6/106   | $2.33 \times 10^{-4}$ | $2.31 \times 10^{-3}$ |
| LJP005 MCF7 3H-CGP-60474-0.37    | 6/106   | $2.33 \times 10^{-4}$ | $2.31 \times 10^{-3}$ |
| LJP006 BT20 24H-CGP-60474-3.33   | 6/110   | $2.85 \times 10^{-4}$ | $2.74 \times 10^{-3}$ |
| LJP008 HCC515 24H-CGP-60474-3.33 | 7/157   | $3.08 \times 10^{-4}$ | $2.93 \times 10^{-3}$ |
| LJP009 A375 24H-CGP-60474-0.12   | 6/112   | $3.14 \times 10^{-4}$ | $2.97 \times 10^{-3}$ |
| LJP006 LNCAP 24H-CGP-60474-10    | 7/159   | $3.32 \times 10^{-4}$ | $3.13 \times 10^{-3}$ |
| LJP007 PC3 24H-CGP-60474-0.04    | 6/114   | $3.45 \times 10^{-4}$ | $3.21 \times 10^{-3}$ |
| LJP005 HCC515 24H-CGP-60474-0.12 | 5/75    | $3.68 \times 10^{-4}$ | $3.41 \times 10^{-3}$ |
| LJP007 MCF7 24H-CGP-60474-10     | 6/117   | $3.97 \times 10^{-4}$ | $3.62 \times 10^{-3}$ |
| LJP006 SKBR3 3H-CGP-60474-0.37   | 4/43    | $4.10 \times 10^{-4}$ | $3.71 \times 10^{-3}$ |
| LJP009 MCF7 24H-CGP-60474-0.04   | 6/119   | $4.34 \times 10^{-4}$ | $3.91 \times 10^{-3}$ |
| LJP008 HT29 24H-CGP-60474-1.11   | 5/78    | $4.42 \times 10^{-4}$ | $3.97 \times 10^{-3}$ |
| LJP006 SKBR3 24H-CGP-60474-3.33  | 6/120   | $4.54 \times 10^{-4}$ | $4.05 \times 10^{-3}$ |
| LJP008 MCF7 24H-CGP-60474-1.11   | 6/121   | $4.75 \times 10^{-4}$ | $4.21 \times 10^{-3}$ |
| LJP008 HEPG2 24H-CGP-60474-0.37  | 6/122   | $4.96 \times 10^{-4}$ | $4.36 \times 10^{-3}$ |
| LJP005 PC3 24H-CGP-60474-0.37    | 7/171   | $5.14 \times 10^{-4}$ | $4.51 \times 10^{-3}$ |
| LJP007 HCC515 24H-CGP-60474-0.12 | 7/179   | $6.75 \times 10^{-4}$ | $5.67 \times 10^{-3}$ |
| LJP007 PC3 24H-CGP-60474-0.12    | 5/87    | $7.29 \times 10^{-4}$ | $6.05 \times 10^{-3}$ |
| LJP009 HCC515 24H-CGP-60474-0.12 | 5/90    | $8.51 \times 10^{-4}$ | $6.83 \times 10^{-3}$ |
| LJP008 MCF7 24H-CGP-60474-0.37   | 5/91    | $8.94 \times 10^{-4}$ | $7.15 \times 10^{-3}$ |
| LJP006 PC3 24H-CGP-60474-1.11    | 6/137   | $9.12 \times 10^{-4}$ | $7.28 \times 10^{-3}$ |
| LJP005 HS578T 3H-CGP-60474-0.04  | 4/53    | $9.12 \times 10^{-4}$ | $7.26 \times 10^{-3}$ |
| LJP005 MCF10A 3H-CGP-60474-0.04  | 4/53    | $9.12 \times 10^{-4}$ | $7.25 \times 10^{-3}$ |

S16 Table: (Continued)

|                                   |       |                       |                       |
|-----------------------------------|-------|-----------------------|-----------------------|
| LJP006 LNCAP 3H-CGP-60474-1.11    | 4/53  | $9.12 \times 10^{-4}$ | $7.24 \times 10^{-3}$ |
| LJP006 MCF10A 24H-CGP-60474-1.11  | 6/138 | $9.47 \times 10^{-4}$ | $7.50 \times 10^{-3}$ |
| LJP008 HT29 24H-CGP-60474-0.12    | 4/55  | $1.05 \times 10^{-3}$ | $8.15 \times 10^{-3}$ |
| LJP006 HCC515 24H-CGP-60474-1.11  | 7/194 | $1.08 \times 10^{-3}$ | $8.34 \times 10^{-3}$ |
| LJP005 HCC515 24H-CGP-60474-1.11  | 6/142 | $1.10 \times 10^{-3}$ | $8.44 \times 10^{-3}$ |
| LJP007 MCF7 24H-CGP-60474-0.37    | 6/142 | $1.10 \times 10^{-3}$ | $8.43 \times 10^{-3}$ |
| LJP006 HME1 3H-CGP-60474-1.11     | 4/57  | $1.20 \times 10^{-3}$ | $9.08 \times 10^{-3}$ |
| LJP007 MCF7 24H-CGP-60474-1.11    | 6/145 | $1.22 \times 10^{-3}$ | $9.19 \times 10^{-3}$ |
| LJP007 HT29 24H-CGP-60474-0.37    | 6/147 | $1.31 \times 10^{-3}$ | $9.74 \times 10^{-3}$ |
| LJP006 SKBR3 24H-CGP-60474-1.11   | 5/100 | $1.37 \times 10^{-3}$ | $1.01 \times 10^{-2}$ |
| LJP005 MCF7 3H-CGP-60474-0.12     | 4/60  | $1.45 \times 10^{-3}$ | $1.06 \times 10^{-2}$ |
| LJP006 A375 24H-CGP-60474-1.11    | 6/156 | $1.78 \times 10^{-3}$ | $1.25 \times 10^{-2}$ |
| LJP006 MCF10A 24H-CGP-60474-3.33  | 6/161 | $2.08 \times 10^{-3}$ | $1.42 \times 10^{-2}$ |
| LJP005 HS578T 3H-CGP-60474-10     | 4/67  | $2.19 \times 10^{-3}$ | $1.48 \times 10^{-2}$ |
| LJP006 PC3 24H-CGP-60474-0.37     | 7/221 | $2.27 \times 10^{-3}$ | $1.53 \times 10^{-2}$ |
| LJP006 MDAMB231 3H-CGP-60474-0.37 | 4/68  | $2.31 \times 10^{-3}$ | $1.55 \times 10^{-2}$ |
| LJP008 MCF7 24H-CGP-60474-0.12    | 5/115 | $2.52 \times 10^{-3}$ | $1.67 \times 10^{-2}$ |
| LJP006 A375 24H-CGP-60474-10      | 5/118 | $2.82 \times 10^{-3}$ | $1.84 \times 10^{-2}$ |
| LJP007 MCF7 24H-CGP-60474-0.12    | 5/119 | $2.93 \times 10^{-3}$ | $1.88 \times 10^{-2}$ |
| LJP008 PC3 24H-CGP-60474-10       | 5/120 | $3.04 \times 10^{-3}$ | $1.94 \times 10^{-2}$ |
| LJP005 A375 24H-CGP-60474-3.33    | 6/174 | $3.07 \times 10^{-3}$ | $1.96 \times 10^{-2}$ |
| LJP006 SKBR3 3H-CGP-60474-1.11    | 3/36  | $3.11 \times 10^{-3}$ | $1.98 \times 10^{-2}$ |
| LJP006 HS578T 3H-CGP-60474-3.33   | 4/74  | $3.14 \times 10^{-3}$ | $1.99 \times 10^{-2}$ |
| LJP008 A375 24H-CGP-60474-0.12    | 6/175 | $3.16 \times 10^{-3}$ | $2.00 \times 10^{-2}$ |
| LJP008 PC3 24H-CGP-60474-3.33     | 6/177 | $3.34 \times 10^{-3}$ | $2.10 \times 10^{-2}$ |
| LJP005 HS578T 24H-CGP-60474-0.37  | 5/124 | $3.49 \times 10^{-3}$ | $2.17 \times 10^{-2}$ |
| LJP008 A375 24H-CGP-60474-10      | 6/179 | $3.53 \times 10^{-3}$ | $2.19 \times 10^{-2}$ |
| LJP005 MCF7 3H-CGP-60474-1.11     | 4/78  | $3.80 \times 10^{-3}$ | $2.32 \times 10^{-2}$ |
| LJP006 A549 24H-CGP-60474-1.11    | 5/129 | $4.14 \times 10^{-3}$ | $2.48 \times 10^{-2}$ |
| LJP006 BT20 24H-CGP-60474-0.12    | 5/129 | $4.14 \times 10^{-3}$ | $2.48 \times 10^{-2}$ |
| LJP006 HME1 3H-CGP-60474-0.12     | 4/80  | $4.16 \times 10^{-3}$ | $2.49 \times 10^{-2}$ |
| LJP005 MDAMB231 3H-CGP-60474-10   | 3/40  | $4.21 \times 10^{-3}$ | $2.51 \times 10^{-2}$ |
| LJP006 MCF10A 3H-CGP-60474-1.11   | 3/40  | $4.21 \times 10^{-3}$ | $2.50 \times 10^{-2}$ |
| LJP009 MCF7 24H-CGP-60474-3.33    | 5/131 | $4.41 \times 10^{-3}$ | $2.61 \times 10^{-2}$ |
| LJP008 PC3 24H-CGP-60474-0.12     | 5/133 | $4.71 \times 10^{-3}$ | $2.74 \times 10^{-2}$ |
| LJP005 PC3 24H-CGP-60474-3.33     | 5/134 | $4.86 \times 10^{-3}$ | $2.80 \times 10^{-2}$ |
| LJP006 SKBR3 24H-CGP-60474-0.04   | 5/134 | $4.86 \times 10^{-3}$ | $2.80 \times 10^{-2}$ |
| LJP006 HS578T 3H-CGP-60474-0.04   | 3/44  | $5.51 \times 10^{-3}$ | $3.09 \times 10^{-2}$ |
| LJP009 PC3 24H-CGP-60474-0.37     | 6/200 | $6.03 \times 10^{-3}$ | $3.31 \times 10^{-2}$ |
| LJP006 HME1 24H-CGP-60474-0.12    | 5/142 | $6.19 \times 10^{-3}$ | $3.39 \times 10^{-2}$ |
| LJP005 HT29 24H-CGP-60474-1.11    | 5/143 | $6.37 \times 10^{-3}$ | $3.46 \times 10^{-2}$ |
| LJP008 A549 24H-CGP-60474-0.04    | 4/91  | $6.56 \times 10^{-3}$ | $3.55 \times 10^{-2}$ |
| LJP009 HCC515 24H-CGP-60474-0.04  | 4/93  | $7.08 \times 10^{-3}$ | $3.76 \times 10^{-2}$ |
| LJP005 BT20 24H-CGP-60474-0.12    | 3/49  | $7.44 \times 10^{-3}$ | $3.93 \times 10^{-2}$ |
| LJP008 A375 24H-CGP-60474-1.11    | 5/151 | $7.98 \times 10^{-3}$ | $4.12 \times 10^{-2}$ |
| LJP006 HS578T 24H-CGP-60474-1.11  | 5/151 | $7.98 \times 10^{-3}$ | $4.12 \times 10^{-2}$ |
| LJP008 A375 24H-CGP-60474-3.33    | 5/152 | $8.19 \times 10^{-3}$ | $4.22 \times 10^{-2}$ |
| LJP005 A549 24H-CGP-60474-0.04    | 2/17  | $8.29 \times 10^{-3}$ | $4.26 \times 10^{-2}$ |
| LJP007 A549 24H-CGP-60474-0.04    | 3/51  | $8.31 \times 10^{-3}$ | $4.25 \times 10^{-2}$ |
| LJP008 A549 24H-CGP-60474-10      | 5/153 | $8.42 \times 10^{-3}$ | $4.30 \times 10^{-2}$ |
| LJP009 PC3 24H-CGP-60474-3.33     | 6/217 | $8.84 \times 10^{-3}$ | $4.46 \times 10^{-2}$ |
| LJP009 HT29 24H-CGP-60474-0.04    | 4/100 | $9.10 \times 10^{-3}$ | $4.58 \times 10^{-2}$ |
| LJP007 HT29 24H-CGP-60474-10      | 5/156 | $9.11 \times 10^{-3}$ | $4.58 \times 10^{-2}$ |
| LJP008 PC3 24H-CGP-60474-1.11     | 5/157 | $9.35 \times 10^{-3}$ | $4.66 \times 10^{-2}$ |
| LJP006 HCC515 24H-CGP-60474-10    | 6/221 | $9.62 \times 10^{-3}$ | $4.78 \times 10^{-2}$ |
| LJP009 MCF7 24H-CGP-60474-1.11    | 5/159 | $9.84 \times 10^{-3}$ | $4.86 \times 10^{-2}$ |
| LJP008 PC3 24H-CGP-60474-0.37     | 5/160 | $1.01 \times 10^{-2}$ | $4.96 \times 10^{-2}$ |
