# Supplementary material for: A new advanced in silico drug discovery method for novel coronavirus (SARS-CoV-2) with tensor decomposition-based unsupervised feature extraction
Source: PubMed Central journal article supplement (PMC7485840; doi:10.1371/journal.pone.0238907), 2020-09-11
Supplement: pone.0238907.s017.pdf [file pone.0238907.s017.pdf]

S17 Table: CGP-60474 significantly affects the expression of the selected 163 genes as evident in the “LINCS L1000 Chem Pert down” category in Enrichr. The last number after the - is dose density.

| Term                             | Overlap | P-value                | Adjusted P-value       |
|----------------------------------|---------|------------------------|------------------------|
| LINCS L1000 Chem Pert down       |         |                        |                        |
| LJP006 SKBR3 24H-CGP-60474-1.11  | 18/106  | $5.03 \times 10^{-19}$ | $3.33 \times 10^{-15}$ |
| LJP006 SKBR3 24H-CGP-60474-10    | 18/118  | $3.76 \times 10^{-18}$ | $1.56 \times 10^{-14}$ |
| LJP007 A549 24H-CGP-60474-0.37   | 12/30   | $4.34 \times 10^{-18}$ | $1.60 \times 10^{-14}$ |
| LJP005 HS578T 24H-CGP-60474-3.33 | 17/131  | $5.56 \times 10^{-16}$ | $5.94 \times 10^{-13}$ |
| LJP006 SKBR3 24H-CGP-60474-0.04  | 16/113  | $1.01 \times 10^{-15}$ | $9.51 \times 10^{-13}$ |
| LJP006 SKBR3 24H-CGP-60474-0.37  | 15/104  | $6.17 \times 10^{-15}$ | $4.44 \times 10^{-12}$ |
| LJP009 A549 24H-CGP-60474-0.04   | 13/67   | $7.47 \times 10^{-15}$ | $4.95 \times 10^{-12}$ |
| LJP006 SKBR3 24H-CGP-60474-3.33  | 15/130  | $1.82 \times 10^{-13}$ | $6.42 \times 10^{-11}$ |
| LJP006 MCF10A 24H-CGP-60474-0.12 | 13/88   | $3.05 \times 10^{-13}$ | $9.91 \times 10^{-11}$ |
| LJP006 HME1 3H-CGP-60474-1.11    | 16/165  | $4.30 \times 10^{-13}$ | $1.31 \times 10^{-10}$ |
| LJP005 BT20 24H-CGP-60474-10     | 13/93   | $6.37 \times 10^{-13}$ | $1.80 \times 10^{-10}$ |
| LJP008 HCC515 24H-CGP-60474-0.12 | 13/101  | $1.89 \times 10^{-12}$ | $4.30 \times 10^{-10}$ |
| LJP007 HCC515 24H-CGP-60474-10   | 12/95   | $1.74 \times 10^{-11}$ | $2.46 \times 10^{-9}$  |
| LJP006 MCF10A 3H-CGP-60474-0.37  | 13/127  | $3.68 \times 10^{-11}$ | $4.67 \times 10^{-9}$  |
| LJP006 MCF10A 24H-CGP-60474-3.33 | 12/102  | $4.09 \times 10^{-11}$ | $5.12 \times 10^{-9}$  |
| LJP006 BT20 24H-CGP-60474-10     | 13/134  | $7.29 \times 10^{-11}$ | $8.16 \times 10^{-9}$  |
| LJP009 A549 24H-CGP-60474-0.12   | 10/63   | $8.63 \times 10^{-11}$ | $9.25 \times 10^{-9}$  |
| LJP006 HEPG2 24H-CGP-60474-10    | 12/109  | $9.04 \times 10^{-11}$ | $9.54 \times 10^{-9}$  |
| LJP006 BT20 24H-CGP-60474-1.11   | 10/65   | $1.19 \times 10^{-10}$ | $1.21 \times 10^{-8}$  |
| LJP005 BT20 24H-CGP-60474-3.33   | 10/66   | $1.40 \times 10^{-10}$ | $1.38 \times 10^{-8}$  |
| LJP005 HS578T 24H-CGP-60474-10   | 12/114  | $1.54 \times 10^{-10}$ | $1.50 \times 10^{-8}$  |
| LJP005 SKBR3 24H-CGP-60474-3.33  | 12/114  | $1.54 \times 10^{-10}$ | $1.49 \times 10^{-8}$  |
| LJP008 A549 24H-CGP-60474-0.12   | 10/67   | $1.63 \times 10^{-10}$ | $1.56 \times 10^{-8}$  |
| LJP005 A549 24H-CGP-60474-0.12   | 15/211  | $2.06 \times 10^{-10}$ | $1.90 \times 10^{-8}$  |
| LJP008 HEPG2 24H-CGP-60474-10    | 12/121  | $3.11 \times 10^{-10}$ | $2.69 \times 10^{-8}$  |
| LJP006 SKBR3 24H-CGP-60474-0.12  | 11/103  | $7.84 \times 10^{-10}$ | $5.76 \times 10^{-8}$  |
| LJP006 A549 24H-CGP-60474-1.11   | 9/57    | $8.18 \times 10^{-10}$ | $5.94 \times 10^{-8}$  |
| LJP007 HT29 24H-CGP-60474-0.37   | 11/105  | $9.66 \times 10^{-10}$ | $6.82 \times 10^{-8}$  |
| LJP008 HEPG2 24H-CGP-60474-0.12  | 12/134  | $1.02 \times 10^{-9}$  | $7.13 \times 10^{-8}$  |
| LJP009 HT29 24H-CGP-60474-0.37   | 9/59    | $1.13 \times 10^{-9}$  | $7.77 \times 10^{-8}$  |
| LJP007 A549 24H-CGP-60474-1.11   | 8/41    | $1.25 \times 10^{-9}$  | $8.45 \times 10^{-8}$  |
| LJP005 A549 24H-CGP-60474-0.37   | 10/82   | $1.27 \times 10^{-9}$  | $8.54 \times 10^{-8}$  |
| LJP009 A549 24H-CGP-60474-10     | 9/61    | $1.53 \times 10^{-9}$  | $9.96 \times 10^{-8}$  |
| LJP005 BT20 24H-CGP-60474-0.12   | 10/84   | $1.61 \times 10^{-9}$  | $1.03 \times 10^{-7}$  |
| LJP006 LNCAP 24H-CGP-60474-0.04  | 12/140  | $1.69 \times 10^{-9}$  | $1.07 \times 10^{-7}$  |
| LJP006 MCF10A 24H-CGP-60474-10   | 10/86   | $2.04 \times 10^{-9}$  | $1.26 \times 10^{-7}$  |
| LJP006 SKBR3 3H-CGP-60474-1.11   | 10/87   | $2.29 \times 10^{-9}$  | $1.40 \times 10^{-7}$  |
| LJP005 SKBR3 3H-CGP-60474-1.11   | 10/89   | $2.86 \times 10^{-9}$  | $1.68 \times 10^{-7}$  |
| LJP005 SKBR3 24H-CGP-60474-0.37  | 10/91   | $3.57 \times 10^{-9}$  | $2.03 \times 10^{-7}$  |
| LJP006 MCF10A 24H-CGP-60474-1.11 | 10/91   | $3.57 \times 10^{-9}$  | $2.02 \times 10^{-7}$  |
| LJP007 HEPG2 24H-CGP-60474-1.11  | 10/91   | $3.57 \times 10^{-9}$  | $2.02 \times 10^{-7}$  |
| LJP007 HT29 24H-CGP-60474-1.11   | 10/91   | $3.57 \times 10^{-9}$  | $2.02 \times 10^{-7}$  |
| LJP006 HS578T 3H-CGP-60474-10    | 12/150  | $3.73 \times 10^{-9}$  | $2.09 \times 10^{-7}$  |
| LJP006 BT20 24H-CGP-60474-3.33   | 10/93   | $4.43 \times 10^{-9}$  | $2.43 \times 10^{-7}$  |
| LJP007 A549 24H-CGP-60474-0.12   | 7/32    | $5.95 \times 10^{-9}$  | $3.13 \times 10^{-7}$  |
| LJP005 HCC515 24H-CGP-60474-1.11 | 8/52    | $9.09 \times 10^{-9}$  | $4.45 \times 10^{-7}$  |
| LJP009 A549 24H-CGP-60474-1.11   | 9/76    | $1.13 \times 10^{-8}$  | $5.40 \times 10^{-7}$  |
| LJP005 MCF10A 24H-CGP-60474-1.11 | 10/103  | $1.21 \times 10^{-8}$  | $5.67 \times 10^{-7}$  |
| LJP006 HME1 3H-CGP-60474-0.04    | 12/167  | $1.26 \times 10^{-8}$  | $5.86 \times 10^{-7}$  |
| LJP006 SKBR3 3H-CGP-60474-0.12   | 9/77    | $1.28 \times 10^{-8}$  | $5.91 \times 10^{-7}$  |
| LJP008 HEPG2 24H-CGP-60474-0.04  | 11/134  | $1.30 \times 10^{-8}$  | $6.00 \times 10^{-7}$  |
| LJP005 MCF7 24H-CGP-60474-3.33   | 10/104  | $1.32 \times 10^{-8}$  | $6.07 \times 10^{-7}$  |
| LJP006 HEPG2 24H-CGP-60474-1.11  | 10/104  | $1.32 \times 10^{-8}$  | $6.03 \times 10^{-7}$  |
| LJP009 HCC515 24H-CGP-60474-0.04 | 10/108  | $1.91 \times 10^{-8}$  | $8.22 \times 10^{-7}$  |

S17 Table: (Continued)

|                                   |        |                       |                       |
|-----------------------------------|--------|-----------------------|-----------------------|
| LJP005 HT29 24H-CGP-60474-3.33    | 10/108 | $1.91 \times 10^{-8}$ | $8.20 \times 10^{-7}$ |
| LJP007 HEPG2 24H-CGP-60474-10     | 9/81   | $2.01 \times 10^{-8}$ | $8.49 \times 10^{-7}$ |
| LJP006 SKBR3 3H-CGP-60474-3.33    | 9/82   | $2.24 \times 10^{-8}$ | $9.28 \times 10^{-7}$ |
| LJP009 HT29 24H-CGP-60474-3.33    | 8/61   | $3.34 \times 10^{-8}$ | $1.32 \times 10^{-6}$ |
| LJP006 HS578T 3H-CGP-60474-0.37   | 10/117 | $4.13 \times 10^{-8}$ | $1.59 \times 10^{-6}$ |
| LJP006 MCF10A 3H-CGP-60474-10     | 11/151 | $4.51 \times 10^{-8}$ | $1.71 \times 10^{-6}$ |
| LJP005 MCF7 24H-CGP-60474-0.12    | 9/89   | $4.63 \times 10^{-8}$ | $1.75 \times 10^{-6}$ |
| LJP009 A549 24H-CGP-60474-3.33    | 9/90   | $5.11 \times 10^{-8}$ | $1.92 \times 10^{-6}$ |
| LJP007 HEPG2 24H-CGP-60474-0.37   | 9/90   | $5.11 \times 10^{-8}$ | $1.90 \times 10^{-6}$ |
| LJP005 HS578T 24H-CGP-60474-0.12  | 9/91   | $5.63 \times 10^{-8}$ | $2.07 \times 10^{-6}$ |
| LJP008 PC3 24H-CGP-60474-10       | 10/121 | $5.70 \times 10^{-8}$ | $2.09 \times 10^{-6}$ |
| LJP006 HME1 3H-CGP-60474-10       | 10/121 | $5.70 \times 10^{-8}$ | $2.08 \times 10^{-6}$ |
| LJP005 HS578T 3H-CGP-60474-0.37   | 11/155 | $5.91 \times 10^{-8}$ | $2.16 \times 10^{-6}$ |
| LJP005 BT20 3H-CGP-60474-1.11     | 7/45   | $7.34 \times 10^{-8}$ | $2.58 \times 10^{-6}$ |
| LJP006 MCF10A 24H-CGP-60474-0.37  | 9/95   | $8.20 \times 10^{-8}$ | $2.83 \times 10^{-6}$ |
| LJP005 A549 24H-CGP-60474-1.11    | 9/96   | $8.99 \times 10^{-8}$ | $3.05 \times 10^{-6}$ |
| LJP008 PC3 24H-CGP-60474-1.11     | 10/128 | $9.74 \times 10^{-8}$ | $3.28 \times 10^{-6}$ |
| LJP008 HCC515 24H-CGP-60474-10    | 9/97   | $9.84 \times 10^{-8}$ | $3.32 \times 10^{-6}$ |
| LJP005 MCF7 24H-CGP-60474-0.37    | 9/97   | $9.84 \times 10^{-8}$ | $3.31 \times 10^{-6}$ |
| LJP005 HA1E 24H-CGP-60474-10      | 8/72   | $1.26 \times 10^{-7}$ | $4.09 \times 10^{-6}$ |
| LJP006 BT20 24H-CGP-60474-0.37    | 8/73   | $1.40 \times 10^{-7}$ | $4.46 \times 10^{-6}$ |
| LJP006 BT20 24H-CGP-60474-0.04    | 9/104  | $1.80 \times 10^{-7}$ | $5.54 \times 10^{-6}$ |
| LJP005 HT29 24H-CGP-60474-0.37    | 8/76   | $1.93 \times 10^{-7}$ | $5.91 \times 10^{-6}$ |
| LJP008 HEPG2 24H-CGP-60474-3.33   | 9/105  | $1.96 \times 10^{-7}$ | $5.96 \times 10^{-6}$ |
| LJP006 HS578T 24H-CGP-60474-0.37  | 9/106  | $2.12 \times 10^{-7}$ | $6.36 \times 10^{-6}$ |
| LJP007 HT29 24H-CGP-60474-10      | 9/106  | $2.12 \times 10^{-7}$ | $6.36 \times 10^{-6}$ |
| LJP008 MCF7 24H-CGP-60474-0.12    | 9/109  | $2.70 \times 10^{-7}$ | $7.74 \times 10^{-6}$ |
| LJP005 MCF10A 3H-CGP-60474-10     | 9/109  | $2.70 \times 10^{-7}$ | $7.73 \times 10^{-6}$ |
| LJP006 MCF10A 3H-CGP-60474-0.04   | 10/143 | $2.76 \times 10^{-7}$ | $7.86 \times 10^{-6}$ |
| LJP007 HT29 24H-CGP-60474-0.04    | 8/80   | $2.89 \times 10^{-7}$ | $8.16 \times 10^{-6}$ |
| LJP007 A549 24H-CGP-60474-0.04    | 6/34   | $2.97 \times 10^{-7}$ | $8.35 \times 10^{-6}$ |
| LJP006 LNCAP 3H-CGP-60474-0.12    | 11/186 | $3.76 \times 10^{-7}$ | $1.02 \times 10^{-5}$ |
| LJP006 HCC515 24H-CGP-60474-10    | 9/115  | $4.27 \times 10^{-7}$ | $1.13 \times 10^{-5}$ |
| LJP005 MCF10A 3H-CGP-60474-1.11   | 9/116  | $4.60 \times 10^{-7}$ | $1.20 \times 10^{-5}$ |
| LJP008 A549 24H-CGP-60474-1.11    | 8/85   | $4.63 \times 10^{-7}$ | $1.21 \times 10^{-5}$ |
| LJP008 HEPG2 24H-CGP-60474-1.11   | 8/85   | $4.63 \times 10^{-7}$ | $1.21 \times 10^{-5}$ |
| LJP008 HCC515 24H-CGP-60474-1.11  | 8/85   | $4.63 \times 10^{-7}$ | $1.20 \times 10^{-5}$ |
| LJP006 HME1 3H-CGP-60474-0.12     | 11/192 | $5.16 \times 10^{-7}$ | $1.31 \times 10^{-5}$ |
| LJP008 HCC515 24H-CGP-60474-3.33  | 9/118  | $5.32 \times 10^{-7}$ | $1.35 \times 10^{-5}$ |
| LJP005 HA1E 24H-CGP-60474-1.11    | 8/87   | $5.54 \times 10^{-7}$ | $1.40 \times 10^{-5}$ |
| LJP005 MDAMB231 3H-CGP-60474-1.11 | 8/87   | $5.54 \times 10^{-7}$ | $1.39 \times 10^{-5}$ |
| LJP006 BT20 24H-CGP-60474-0.12    | 9/121  | $6.59 \times 10^{-7}$ | $1.62 \times 10^{-5}$ |
| LJP009 HCC515 24H-CGP-60474-3.33  | 8/89   | $6.61 \times 10^{-7}$ | $1.62 \times 10^{-5}$ |
| LJP008 PC3 24H-CGP-60474-0.37     | 9/122  | $7.06 \times 10^{-7}$ | $1.72 \times 10^{-5}$ |
| LJP006 MCF7 24H-CGP-60474-0.04    | 7/62   | $7.08 \times 10^{-7}$ | $1.71 \times 10^{-5}$ |
| LJP008 HA1E 24H-CGP-60474-0.37    | 8/90   | $7.20 \times 10^{-7}$ | $1.74 \times 10^{-5}$ |
| LJP006 MDAMB231 24H-CGP-60474-10  | 8/90   | $7.20 \times 10^{-7}$ | $1.73 \times 10^{-5}$ |
| LJP005 BT20 3H-CGP-60474-3.33     | 8/91   | $7.84 \times 10^{-7}$ | $1.88 \times 10^{-5}$ |
| LJP006 HME1 24H-CGP-60474-10      | 8/91   | $7.84 \times 10^{-7}$ | $1.88 \times 10^{-5}$ |
| LJP006 SKBR3 3H-CGP-60474-0.37    | 8/91   | $7.84 \times 10^{-7}$ | $1.88 \times 10^{-5}$ |
| LJP008 A375 24H-CGP-60474-1.11    | 8/92   | $8.53 \times 10^{-7}$ | $2.02 \times 10^{-5}$ |
| LJP009 HCC515 24H-CGP-60474-0.12  | 8/93   | $9.27 \times 10^{-7}$ | $2.18 \times 10^{-5}$ |
| LJP007 A375 24H-CGP-60474-3.33    | 8/93   | $9.27 \times 10^{-7}$ | $2.17 \times 10^{-5}$ |
| LJP006 HT29 24H-CGP-60474-10      | 8/94   | $1.01 \times 10^{-6}$ | $2.32 \times 10^{-5}$ |
| LJP005 MCF7 24H-CGP-60474-1.11    | 8/96   | $1.18 \times 10^{-6}$ | $2.67 \times 10^{-5}$ |
| LJP006 LNCAP 3H-CGP-60474-1.11    | 8/97   | $1.28 \times 10^{-6}$ | $2.85 \times 10^{-5}$ |
| LJP006 HA1E 24H-CGP-60474-3.33    | 7/68   | $1.34 \times 10^{-6}$ | $2.95 \times 10^{-5}$ |

S17 Table: (Continued)

|                                    |        |                       |                       |
|------------------------------------|--------|-----------------------|-----------------------|
| LJP006 MDAMB231 3H-CGP-60474-3.33  | 9/132  | $1.37 \times 10^{-6}$ | $3.01 \times 10^{-5}$ |
| LJP007 MCF7 24H-CGP-60474-0.12     | 9/133  | $1.46 \times 10^{-6}$ | $3.19 \times 10^{-5}$ |
| LJP005 HS578T 3H-CGP-60474-3.33    | 10/173 | $1.59 \times 10^{-6}$ | $3.43 \times 10^{-5}$ |
| LJP007 HA1E 24H-CGP-60474-10       | 8/101  | $1.74 \times 10^{-6}$ | $3.68 \times 10^{-5}$ |
| LJP009 A375 24H-CGP-60474-0.04     | 8/102  | $1.88 \times 10^{-6}$ | $3.92 \times 10^{-5}$ |
| LJP006 HME1 24H-CGP-60474-1.11     | 7/72   | $1.98 \times 10^{-6}$ | $4.09 \times 10^{-5}$ |
| LJP008 A375 24H-CGP-60474-0.04     | 9/138  | $1.99 \times 10^{-6}$ | $4.09 \times 10^{-5}$ |
| LJP005 PC3 24H-CGP-60474-0.12      | 8/103  | $2.02 \times 10^{-6}$ | $4.16 \times 10^{-5}$ |
| LJP007 A375 24H-CGP-60474-0.04     | 8/105  | $2.34 \times 10^{-6}$ | $4.72 \times 10^{-5}$ |
| LJP005 HA1E 24H-CGP-60474-3.33     | 7/74   | $2.39 \times 10^{-6}$ | $4.79 \times 10^{-5}$ |
| LJP005 HT29 24H-CGP-60474-1.11     | 8/106  | $2.51 \times 10^{-6}$ | $4.99 \times 10^{-5}$ |
| LJP006 HCC515 24H-CGP-60474-0.37   | 8/106  | $2.51 \times 10^{-6}$ | $4.99 \times 10^{-5}$ |
| LJP005 MCF7 3H-CGP-60474-10        | 8/107  | $2.69 \times 10^{-6}$ | $5.30 \times 10^{-5}$ |
| LJP008 HA1E 24H-CGP-60474-3.33     | 7/76   | $2.86 \times 10^{-6}$ | $5.57 \times 10^{-5}$ |
| LJP009 A549 24H-CGP-60474-0.37     | 7/76   | $2.86 \times 10^{-6}$ | $5.57 \times 10^{-5}$ |
| LJP005 HCC515 24H-CGP-60474-0.37   | 8/108  | $2.89 \times 10^{-6}$ | $5.60 \times 10^{-5}$ |
| LJP005 MCF10A 24H-CGP-60474-0.12   | 7/77   | $3.13 \times 10^{-6}$ | $6.01 \times 10^{-5}$ |
| LJP008 A549 24H-CGP-60474-10       | 8/110  | $3.32 \times 10^{-6}$ | $6.33 \times 10^{-5}$ |
| LJP005 SKBR3 3H-CGP-60474-10       | 7/78   | $3.41 \times 10^{-6}$ | $6.48 \times 10^{-5}$ |
| LJP006 HS578T 24H-CGP-60474-10     | 7/78   | $3.41 \times 10^{-6}$ | $6.46 \times 10^{-5}$ |
| LJP006 MCF7 24H-CGP-60474-3.33     | 5/29   | $3.43 \times 10^{-6}$ | $6.46 \times 10^{-5}$ |
| LJP007 MCF7 24H-CGP-60474-0.04     | 10/189 | $3.53 \times 10^{-6}$ | $6.65 \times 10^{-5}$ |
| LJP005 MCF7 3H-CGP-60474-1.11      | 8/111  | $3.55 \times 10^{-6}$ | $6.68 \times 10^{-5}$ |
| LJP006 LNCAP 24H-CGP-60474-3.33    | 8/111  | $3.55 \times 10^{-6}$ | $6.67 \times 10^{-5}$ |
| LJP006 HS578T 24H-CGP-60474-0.04   | 7/79   | $3.72 \times 10^{-6}$ | $6.95 \times 10^{-5}$ |
| LJP009 HEPG2 24H-CGP-60474-1.11    | 8/112  | $3.80 \times 10^{-6}$ | $7.08 \times 10^{-5}$ |
| LJP008 A549 24H-CGP-60474-0.37     | 7/80   | $4.05 \times 10^{-6}$ | $7.50 \times 10^{-5}$ |
| LJP006 MCF10A 3H-CGP-60474-0.12    | 9/151  | $4.18 \times 10^{-6}$ | $7.69 \times 10^{-5}$ |
| LJP006 HS578T 3H-CGP-60474-0.04    | 8/115  | $4.63 \times 10^{-6}$ | $8.43 \times 10^{-5}$ |
| LJP006 MCF10A 3H-CGP-60474-1.11    | 8/115  | $4.63 \times 10^{-6}$ | $8.42 \times 10^{-5}$ |
| LJP005 A549 24H-CGP-60474-3.33     | 8/116  | $4.94 \times 10^{-6}$ | $8.93 \times 10^{-5}$ |
| LJP006 HS578T 24H-CGP-60474-0.12   | 7/83   | $5.18 \times 10^{-6}$ | $9.27 \times 10^{-5}$ |
| LJP009 HEPG2 24H-CGP-60474-0.12    | 8/117  | $5.26 \times 10^{-6}$ | $9.39 \times 10^{-5}$ |
| LJP005 HA1E 24H-CGP-60474-0.04     | 8/118  | $5.61 \times 10^{-6}$ | $9.93 \times 10^{-5}$ |
| LJP008 PC3 24H-CGP-60474-0.12      | 8/118  | $5.61 \times 10^{-6}$ | $9.92 \times 10^{-5}$ |
| LJP005 SKBR3 3H-CGP-60474-0.37     | 7/87   | $7.10 \times 10^{-6}$ | $1.21 \times 10^{-4}$ |
| LJP006 HCC515 24H-CGP-60474-1.11   | 7/87   | $7.10 \times 10^{-6}$ | $1.21 \times 10^{-4}$ |
| LJP007 HT29 24H-CGP-60474-3.33     | 7/87   | $7.10 \times 10^{-6}$ | $1.20 \times 10^{-4}$ |
| LJP006 HME1 3H-CGP-60474-0.37      | 9/162  | $7.41 \times 10^{-6}$ | $1.26 \times 10^{-4}$ |
| LJP005 HEPG2 24H-CGP-60474-1.11    | 6/59   | $8.42 \times 10^{-6}$ | $1.40 \times 10^{-4}$ |
| LJP005 MDAMB231 3H-CGP-60474-3.33  | 8/125  | $8.59 \times 10^{-6}$ | $1.42 \times 10^{-4}$ |
| LJP008 HCC515 24H-CGP-60474-0.04   | 7/91   | $9.57 \times 10^{-6}$ | $1.56 \times 10^{-4}$ |
| LJP006 HME1 24H-CGP-60474-0.12     | 7/91   | $9.57 \times 10^{-6}$ | $1.56 \times 10^{-4}$ |
| LJP006 HS578T 3H-CGP-60474-1.11    | 8/127  | $9.66 \times 10^{-6}$ | $1.57 \times 10^{-4}$ |
| LJP006 MDAMB231 24H-CGP-60474-3.33 | 7/92   | $1.03 \times 10^{-5}$ | $1.66 \times 10^{-4}$ |
| LJP007 HCC515 24H-CGP-60474-0.37   | 7/92   | $1.03 \times 10^{-5}$ | $1.65 \times 10^{-4}$ |
| LJP007 HT29 24H-CGP-60474-0.12     | 7/92   | $1.03 \times 10^{-5}$ | $1.65 \times 10^{-4}$ |
| LJP007 HEPG2 24H-CGP-60474-0.04    | 6/62   | $1.13 \times 10^{-5}$ | $1.79 \times 10^{-4}$ |
| LJP008 MCF7 24H-CGP-60474-0.04     | 7/94   | $1.19 \times 10^{-5}$ | $1.88 \times 10^{-4}$ |
| LJP006 BT20 3H-CGP-60474-0.04      | 5/37   | $1.19 \times 10^{-5}$ | $1.88 \times 10^{-4}$ |
| LJP009 HEPG2 24H-CGP-60474-0.04    | 8/133  | $1.35 \times 10^{-5}$ | $2.11 \times 10^{-4}$ |
| LJP005 HEPG2 24H-CGP-60474-3.33    | 6/64   | $1.36 \times 10^{-5}$ | $2.11 \times 10^{-4}$ |
| LJP008 HT29 24H-CGP-60474-0.37     | 6/64   | $1.36 \times 10^{-5}$ | $2.11 \times 10^{-4}$ |
| LJP009 HEPG2 24H-CGP-60474-3.33    | 7/97   | $1.46 \times 10^{-5}$ | $2.24 \times 10^{-4}$ |
| LJP005 MCF10A 24H-CGP-60474-0.04   | 6/65   | $1.48 \times 10^{-5}$ | $2.27 \times 10^{-4}$ |
| LJP009 HT29 24H-CGP-60474-1.11     | 6/66   | $1.62 \times 10^{-5}$ | $2.45 \times 10^{-4}$ |
| LJP006 HS578T 3H-CGP-60474-3.33    | 7/99   | $1.67 \times 10^{-5}$ | $2.49 \times 10^{-4}$ |

S17 Table: (Continued)

|                                    |       |                       |                       |
|------------------------------------|-------|-----------------------|-----------------------|
| LJP009 HT29 24H-CGP-60474-0.04     | 6/67  | $1.77 \times 10^{-5}$ | $2.62 \times 10^{-4}$ |
| LJP006 A549 24H-CGP-60474-0.37     | 6/67  | $1.77 \times 10^{-5}$ | $2.62 \times 10^{-4}$ |
| LJP006 MDAMB231 3H-CGP-60474-1.11  | 8/138 | $1.77 \times 10^{-5}$ | $2.61 \times 10^{-4}$ |
| LJP007 MCF7 24H-CGP-60474-3.33     | 7/101 | $1.90 \times 10^{-5}$ | $2.79 \times 10^{-4}$ |
| LJP006 HME1 3H-CGP-60474-3.33      | 8/141 | $2.07 \times 10^{-5}$ | $3.01 \times 10^{-4}$ |
| LJP006 MDAMB231 3H-CGP-60474-0.04  | 6/69  | $2.10 \times 10^{-5}$ | $3.04 \times 10^{-4}$ |
| LJP005 HS578T 24H-CGP-60474-0.37   | 7/103 | $2.16 \times 10^{-5}$ | $3.13 \times 10^{-4}$ |
| LJP009 MCF7 24H-CGP-60474-0.37     | 8/142 | $2.18 \times 10^{-5}$ | $3.15 \times 10^{-4}$ |
| LJP005 MCF10A 3H-CGP-60474-0.12    | 7/104 | $2.30 \times 10^{-5}$ | $3.28 \times 10^{-4}$ |
| LJP006 MDAMB231 3H-CGP-60474-0.37  | 7/105 | $2.45 \times 10^{-5}$ | $3.49 \times 10^{-4}$ |
| LJP008 PC3 24H-CGP-60474-3.33      | 8/145 | $2.54 \times 10^{-5}$ | $3.59 \times 10^{-4}$ |
| LJP007 HA1E 24H-CGP-60474-1.11     | 6/72  | $2.68 \times 10^{-5}$ | $3.76 \times 10^{-4}$ |
| LJP006 HS578T 3H-CGP-60474-0.12    | 7/107 | $2.76 \times 10^{-5}$ | $3.88 \times 10^{-4}$ |
| LJP006 HME1 24H-CGP-60474-3.33     | 6/73  | $2.90 \times 10^{-5}$ | $4.01 \times 10^{-4}$ |
| LJP008 A549 24H-CGP-60474-3.33     | 6/74  | $3.13 \times 10^{-5}$ | $4.31 \times 10^{-4}$ |
| LJP006 LNCAP 3H-CGP-60474-3.33     | 7/110 | $3.31 \times 10^{-5}$ | $4.51 \times 10^{-4}$ |
| LJP007 A375 24H-CGP-60474-10       | 7/110 | $3.31 \times 10^{-5}$ | $4.50 \times 10^{-4}$ |
| LJP006 MCF7 24H-CGP-60474-10       | 6/75  | $3.38 \times 10^{-5}$ | $4.58 \times 10^{-4}$ |
| LJP006 HA1E 24H-CGP-60474-0.37     | 6/76  | $3.65 \times 10^{-5}$ | $4.88 \times 10^{-4}$ |
| LJP007 PC3 24H-CGP-60474-0.04      | 6/77  | $3.93 \times 10^{-5}$ | $5.18 \times 10^{-4}$ |
| LJP006 A549 24H-CGP-60474-10       | 6/79  | $4.54 \times 10^{-5}$ | $5.85 \times 10^{-4}$ |
| LJP005 MCF10A 24H-CGP-60474-0.37   | 6/80  | $4.88 \times 10^{-5}$ | $6.21 \times 10^{-4}$ |
| LJP006 MCF7 24H-CGP-60474-1.11     | 6/80  | $4.88 \times 10^{-5}$ | $6.20 \times 10^{-4}$ |
| LJP008 A375 24H-CGP-60474-0.37     | 6/81  | $5.24 \times 10^{-5}$ | $6.62 \times 10^{-4}$ |
| LJP008 A375 24H-CGP-60474-0.12     | 6/82  | $5.61 \times 10^{-5}$ | $7.01 \times 10^{-4}$ |
| LJP005 HEPG2 24H-CGP-60474-0.37    | 6/82  | $5.61 \times 10^{-5}$ | $7.01 \times 10^{-4}$ |
| LJP005 MDAMB231 3H-CGP-60474-0.12  | 6/82  | $5.61 \times 10^{-5}$ | $7.00 \times 10^{-4}$ |
| LJP007 HCC515 24H-CGP-60474-1.11   | 6/82  | $5.61 \times 10^{-5}$ | $6.98 \times 10^{-4}$ |
| LJP006 MCF7 3H-CGP-60474-3.33      | 7/120 | $5.77 \times 10^{-5}$ | $7.17 \times 10^{-4}$ |
| LJP007 HCC515 24H-CGP-60474-3.33   | 6/83  | $6.01 \times 10^{-5}$ | $7.41 \times 10^{-4}$ |
| LJP009 A375 24H-CGP-60474-0.37     | 7/121 | $6.09 \times 10^{-5}$ | $7.50 \times 10^{-4}$ |
| LJP005 MDAMB231 24H-CGP-60474-0.12 | 4/27  | $6.45 \times 10^{-5}$ | $7.86 \times 10^{-4}$ |
| LJP005 MDAMB231 3H-CGP-60474-10    | 7/123 | $6.75 \times 10^{-5}$ | $8.17 \times 10^{-4}$ |
| LJP008 HT29 24H-CGP-60474-3.33     | 6/85  | $6.87 \times 10^{-5}$ | $8.29 \times 10^{-4}$ |
| LJP006 MDAMB231 3H-CGP-60474-0.12  | 7/125 | $7.48 \times 10^{-5}$ | $8.86 \times 10^{-4}$ |
| LJP006 HS578T 24H-CGP-60474-1.11   | 6/87  | $7.83 \times 10^{-5}$ | $9.18 \times 10^{-4}$ |
| LJP007 HCC515 24H-CGP-60474-0.12   | 6/87  | $7.83 \times 10^{-5}$ | $9.17 \times 10^{-4}$ |
| LJP005 MDAMB231 3H-CGP-60474-0.37  | 7/129 | $9.12 \times 10^{-5}$ | $1.04 \times 10^{-3}$ |
| LJP006 LNCAP 24H-CGP-60474-1.11    | 7/129 | $9.12 \times 10^{-5}$ | $1.04 \times 10^{-3}$ |
| LJP005 HS578T 3H-CGP-60474-0.04    | 5/56  | $9.23 \times 10^{-5}$ | $1.05 \times 10^{-3}$ |
| LJP006 LNCAP 24H-CGP-60474-0.12    | 7/130 | $9.58 \times 10^{-5}$ | $1.08 \times 10^{-3}$ |
| LJP006 PC3 24H-CGP-60474-10        | 5/57  | $1.01 \times 10^{-4}$ | $1.13 \times 10^{-3}$ |
| LJP005 PC3 24H-CGP-60474-3.33      | 6/92  | $1.07 \times 10^{-4}$ | $1.19 \times 10^{-3}$ |
| LJP006 HA1E 24H-CGP-60474-10       | 5/60  | $1.29 \times 10^{-4}$ | $1.39 \times 10^{-3}$ |
| LJP009 HCC515 24H-CGP-60474-10     | 6/96  | $1.35 \times 10^{-4}$ | $1.46 \times 10^{-3}$ |
| LJP005 HA1E 24H-CGP-60474-0.12     | 6/96  | $1.35 \times 10^{-4}$ | $1.46 \times 10^{-3}$ |
| LJP007 HCC515 24H-CGP-60474-0.04   | 6/96  | $1.35 \times 10^{-4}$ | $1.45 \times 10^{-3}$ |
| LJP008 HA1E 24H-CGP-60474-1.11     | 6/97  | $1.43 \times 10^{-4}$ | $1.53 \times 10^{-3}$ |
| LJP005 SKBR3 24H-CGP-60474-0.12    | 6/97  | $1.43 \times 10^{-4}$ | $1.53 \times 10^{-3}$ |
| LJP006 HME1 24H-CGP-60474-0.37     | 6/97  | $1.43 \times 10^{-4}$ | $1.53 \times 10^{-3}$ |
| LJP007 A549 24H-CGP-60474-3.33     | 4/33  | $1.45 \times 10^{-4}$ | $1.53 \times 10^{-3}$ |
| LJP005 BT20 3H-CGP-60474-0.04      | 4/34  | $1.63 \times 10^{-4}$ | $1.70 \times 10^{-3}$ |
| LJP007 HA1E 24H-CGP-60474-0.37     | 6/100 | $1.69 \times 10^{-4}$ | $1.75 \times 10^{-3}$ |
| LJP006 LNCAP 24H-CGP-60474-0.37    | 7/144 | $1.81 \times 10^{-4}$ | $1.86 \times 10^{-3}$ |
| LJP006 BT20 3H-CGP-60474-0.12      | 4/35  | $1.83 \times 10^{-4}$ | $1.87 \times 10^{-3}$ |
| LJP009 HA1E 24H-CGP-60474-3.33     | 6/107 | $2.45 \times 10^{-4}$ | $2.41 \times 10^{-3}$ |
| LJP006 MCF10A 24H-CGP-60474-0.04   | 5/69  | $2.49 \times 10^{-4}$ | $2.45 \times 10^{-3}$ |

S17 Table: (Continued)

|                                    |       |                       |                       |
|------------------------------------|-------|-----------------------|-----------------------|
| LJP006 A375 24H-CGP-60474-10       | 6/108 | $2.58 \times 10^{-4}$ | $2.51 \times 10^{-3}$ |
| LJP005 MCF10A 3H-CGP-60474-0.37    | 7/154 | $2.73 \times 10^{-4}$ | $2.65 \times 10^{-3}$ |
| LJP008 MCF7 24H-CGP-60474-10       | 5/71  | $2.85 \times 10^{-4}$ | $2.73 \times 10^{-3}$ |
| LJP009 A375 24H-CGP-60474-1.11     | 6/112 | $3.14 \times 10^{-4}$ | $2.96 \times 10^{-3}$ |
| LJP005 MCF10A 3H-CGP-60474-3.33    | 5/73  | $3.25 \times 10^{-4}$ | $3.06 \times 10^{-3}$ |
| LJP006 HEPG2 24H-CGP-60474-0.37    | 5/73  | $3.25 \times 10^{-4}$ | $3.06 \times 10^{-3}$ |
| LJP006 PC3 24H-CGP-60474-3.33      | 4/41  | $3.40 \times 10^{-4}$ | $3.16 \times 10^{-3}$ |
| LJP009 HA1E 24H-CGP-60474-1.11     | 5/76  | $3.92 \times 10^{-4}$ | $3.57 \times 10^{-3}$ |
| LJP006 HA1E 24H-CGP-60474-0.04     | 5/76  | $3.92 \times 10^{-4}$ | $3.57 \times 10^{-3}$ |
| LJP008 HEPG2 24H-CGP-60474-0.37    | 6/118 | $4.15 \times 10^{-4}$ | $3.73 \times 10^{-3}$ |
| LJP006 LNCAP 3H-CGP-60474-0.37     | 6/119 | $4.34 \times 10^{-4}$ | $3.88 \times 10^{-3}$ |
| LJP006 SKBR3 3H-CGP-60474-10       | 6/119 | $4.34 \times 10^{-4}$ | $3.88 \times 10^{-3}$ |
| LJP005 HCC515 24H-CGP-60474-0.12   | 5/78  | $4.42 \times 10^{-4}$ | $3.94 \times 10^{-3}$ |
| LJP006 MCF7 3H-CGP-60474-0.37      | 7/167 | $4.46 \times 10^{-4}$ | $3.97 \times 10^{-3}$ |
| LJP006 HT29 24H-CGP-60474-1.11     | 5/80  | $4.97 \times 10^{-4}$ | $4.34 \times 10^{-3}$ |
| LJP006 MDAMB231 3H-CGP-60474-10    | 7/170 | $4.97 \times 10^{-4}$ | $4.34 \times 10^{-3}$ |
| LJP005 HS578T 3H-CGP-60474-0.12    | 5/81  | $5.26 \times 10^{-4}$ | $4.58 \times 10^{-3}$ |
| LJP007 A375 24H-CGP-60474-1.11     | 5/81  | $5.26 \times 10^{-4}$ | $4.57 \times 10^{-3}$ |
| LJP005 A375 24H-CGP-60474-1.11     | 5/82  | $5.56 \times 10^{-4}$ | $4.78 \times 10^{-3}$ |
| LJP006 MCF7 3H-CGP-60474-1.11      | 6/125 | $5.64 \times 10^{-4}$ | $4.83 \times 10^{-3}$ |
| LJP006 BT20 3H-CGP-60474-10        | 4/48  | $6.26 \times 10^{-4}$ | $5.26 \times 10^{-3}$ |
| LJP005 HA1E 24H-CGP-60474-0.37     | 5/86  | $6.92 \times 10^{-4}$ | $5.73 \times 10^{-3}$ |
| LJP008 A375 24H-CGP-60474-10       | 5/88  | $7.68 \times 10^{-4}$ | $6.27 \times 10^{-3}$ |
| LJP008 A549 24H-CGP-60474-0.04     | 6/133 | $7.82 \times 10^{-4}$ | $6.37 \times 10^{-3}$ |
| LJP009 MCF7 24H-CGP-60474-10       | 6/134 | $8.13 \times 10^{-4}$ | $6.57 \times 10^{-3}$ |
| LJP005 MCF7 3H-CGP-60474-3.33      | 5/90  | $8.51 \times 10^{-4}$ | $6.80 \times 10^{-3}$ |
| LJP009 MCF7 24H-CGP-60474-1.11     | 6/136 | $8.78 \times 10^{-4}$ | $7.01 \times 10^{-3}$ |
| LJP005 SKBR3 3H-CGP-60474-0.12     | 4/54  | $9.79 \times 10^{-4}$ | $7.70 \times 10^{-3}$ |
| LJP006 LNCAP 3H-CGP-60474-0.04     | 5/93  | $9.86 \times 10^{-4}$ | $7.71 \times 10^{-3}$ |
| LJP006 BT20 3H-CGP-60474-3.33      | 4/56  | $1.12 \times 10^{-3}$ | $8.61 \times 10^{-3}$ |
| LJP006 HA1E 24H-CGP-60474-0.12     | 5/97  | $1.19 \times 10^{-3}$ | $9.08 \times 10^{-3}$ |
| LJP006 HT29 24H-CGP-60474-0.37     | 5/97  | $1.19 \times 10^{-3}$ | $9.07 \times 10^{-3}$ |
| LJP005 A375 24H-CGP-60474-0.04     | 4/57  | $1.20 \times 10^{-3}$ | $9.12 \times 10^{-3}$ |
| LJP005 BT20 3H-CGP-60474-10        | 4/57  | $1.20 \times 10^{-3}$ | $9.11 \times 10^{-3}$ |
| LJP008 PC3 24H-CGP-60474-0.04      | 6/145 | $1.22 \times 10^{-3}$ | $9.23 \times 10^{-3}$ |
| LJP007 HEPG2 24H-CGP-60474-0.12    | 4/60  | $1.45 \times 10^{-3}$ | $1.07 \times 10^{-2}$ |
| LJP007 MCF7 24H-CGP-60474-10       | 5/103 | $1.56 \times 10^{-3}$ | $1.13 \times 10^{-2}$ |
| LJP005 MCF7 3H-CGP-60474-0.37      | 6/152 | $1.56 \times 10^{-3}$ | $1.13 \times 10^{-2}$ |
| LJP006 HA1E 24H-CGP-60474-1.11     | 4/62  | $1.64 \times 10^{-3}$ | $1.18 \times 10^{-2}$ |
| LJP007 A549 24H-CGP-60474-10       | 3/29  | $1.66 \times 10^{-3}$ | $1.19 \times 10^{-2}$ |
| LJP005 A549 24H-CGP-60474-0.04     | 4/64  | $1.85 \times 10^{-3}$ | $1.30 \times 10^{-2}$ |
| LJP006 A375 24H-CGP-60474-1.11     | 4/64  | $1.85 \times 10^{-3}$ | $1.30 \times 10^{-2}$ |
| LJP006 MCF7 3H-CGP-60474-0.04      | 4/64  | $1.85 \times 10^{-3}$ | $1.30 \times 10^{-2}$ |
| LJP009 MCF7 24H-CGP-60474-0.12     | 6/158 | $1.89 \times 10^{-3}$ | $1.33 \times 10^{-2}$ |
| LJP006 PC3 24H-CGP-60474-1.11      | 4/66  | $2.07 \times 10^{-3}$ | $1.43 \times 10^{-2}$ |
| LJP009 PC3 24H-CGP-60474-10        | 5/110 | $2.08 \times 10^{-3}$ | $1.43 \times 10^{-2}$ |
| LJP005 HS578T 24H-CGP-60474-0.04   | 4/67  | $2.19 \times 10^{-3}$ | $1.50 \times 10^{-2}$ |
| LJP007 HA1E 24H-CGP-60474-3.33     | 4/70  | $2.57 \times 10^{-3}$ | $1.71 \times 10^{-2}$ |
| LJP008 A375 24H-CGP-60474-3.33     | 4/72  | $2.84 \times 10^{-3}$ | $1.87 \times 10^{-2}$ |
| LJP006 MCF7 3H-CGP-60474-10        | 5/119 | $2.93 \times 10^{-3}$ | $1.90 \times 10^{-2}$ |
| LJP006 LNCAP 24H-CGP-60474-10      | 5/122 | $3.26 \times 10^{-3}$ | $2.08 \times 10^{-2}$ |
| LJP006 MCF7 24H-CGP-60474-0.37     | 4/76  | $3.46 \times 10^{-3}$ | $2.18 \times 10^{-2}$ |
| LJP005 HS578T 3H-CGP-60474-10      | 5/125 | $3.62 \times 10^{-3}$ | $2.27 \times 10^{-2}$ |
| LJP005 HT29 24H-CGP-60474-0.12     | 4/78  | $3.80 \times 10^{-3}$ | $2.35 \times 10^{-2}$ |
| LJP008 HT29 24H-CGP-60474-0.04     | 4/79  | $3.98 \times 10^{-3}$ | $2.43 \times 10^{-2}$ |
| LJP006 MDAMB231 24H-CGP-60474-0.12 | 4/79  | $3.98 \times 10^{-3}$ | $2.43 \times 10^{-2}$ |
| LJP007 HA1E 24H-CGP-60474-0.12     | 5/138 | $5.49 \times 10^{-3}$ | $3.17 \times 10^{-2}$ |

S17 Table: (Continued)

|                                    |       |                       |                       |
|------------------------------------|-------|-----------------------|-----------------------|
| LJP005 MDAMB231 24H-CGP-60474-0.37 | 3/44  | $5.51 \times 10^{-3}$ | $3.16 \times 10^{-2}$ |
| LJP007 PC3 24H-CGP-60474-3.33      | 4/87  | $5.60 \times 10^{-3}$ | $3.20 \times 10^{-2}$ |
| LJP007 MCF7 24H-CGP-60474-1.11     | 5/139 | $5.66 \times 10^{-3}$ | $3.22 \times 10^{-2}$ |
| LJP005 A375 24H-CGP-60474-3.33     | 4/88  | $5.83 \times 10^{-3}$ | $3.31 \times 10^{-2}$ |
| LJP007 PC3 24H-CGP-60474-10        | 4/88  | $5.83 \times 10^{-3}$ | $3.31 \times 10^{-2}$ |
| LJP006 BT20 3H-CGP-60474-0.37      | 3/49  | $7.44 \times 10^{-3}$ | $3.99 \times 10^{-2}$ |
| LJP007 MCF7 24H-CGP-60474-0.37     | 5/149 | $7.55 \times 10^{-3}$ | $4.04 \times 10^{-2}$ |
| LJP009 MCF7 24H-CGP-60474-3.33     | 5/151 | $7.98 \times 10^{-3}$ | $4.23 \times 10^{-2}$ |
| LJP008 MCF7 24H-CGP-60474-1.11     | 4/98  | $8.49 \times 10^{-3}$ | $4.44 \times 10^{-2}$ |
| LJP005 SKBR3 3H-CGP-60474-3.33     | 4/98  | $8.49 \times 10^{-3}$ | $4.43 \times 10^{-2}$ |
| LJP005 HS578T 3H-CGP-60474-1.11    | 5/159 | $9.84 \times 10^{-3}$ | $5.00 \times 10^{-2}$ |
