# Supplementary material for: A new advanced in silico drug discovery method for novel coronavirus (SARS-CoV-2) with tensor decomposition-based unsupervised feature extraction
Source: PubMed Central journal article supplement (PMC7485840; doi:10.1371/journal.pone.0238907), 2020-09-11
Supplement: pone.0238907.s018.pdf [file pone.0238907.s018.pdf]

S18 Table: Alvocidib significantly affects the expression of the selected 163 genes as evident in the “LINCS L1000 Chem Pert up” category in Enrichr. The last number after the - is dose density.

| Term                              | Overlap | P-value               | Adjusted P-value      |
|-----------------------------------|---------|-----------------------|-----------------------|
| LINCS L1000 Chem Pert up          |         |                       |                       |
| LJP006 MCF7 3H-alvocidib-10       | 9/87    | $3.79 \times 10^{-8}$ | $1.57 \times 10^{-6}$ |
| LJP006 SKBR3 24H-alvocidib-1.11   | 9/116   | $4.60 \times 10^{-7}$ | $1.29 \times 10^{-5}$ |
| LJP006 HME1 3H-alvocidib-0.12     | 7/82    | $4.78 \times 10^{-6}$ | $9.07 \times 10^{-5}$ |
| LJP006 HS578T 3H-alvocidib-0.37   | 6/61    | $1.02 \times 10^{-5}$ | $1.69 \times 10^{-4}$ |
| LJP006 BT20 24H-alvocidib-3.33    | 7/108   | $2.94 \times 10^{-5}$ | $4.11 \times 10^{-4}$ |
| LJP006 HME1 3H-alvocidib-1.11     | 5/56    | $9.23 \times 10^{-5}$ | $1.07 \times 10^{-3}$ |
| LJP006 BT20 24H-alvocidib-0.04    | 5/57    | $1.01 \times 10^{-4}$ | $1.15 \times 10^{-3}$ |
| LJP006 SKBR3 3H-alvocidib-0.37    | 5/57    | $1.01 \times 10^{-4}$ | $1.15 \times 10^{-3}$ |
| LJP006 BT20 24H-alvocidib-1.11    | 6/98    | $1.52 \times 10^{-4}$ | $1.62 \times 10^{-3}$ |
| LJP006 MCF10A 24H-alvocidib-0.04  | 6/106   | $2.33 \times 10^{-4}$ | $2.31 \times 10^{-3}$ |
| LJP006 MCF10A 24H-alvocidib-10    | 7/150   | $2.33 \times 10^{-4}$ | $2.31 \times 10^{-3}$ |
| LJP006 SKBR3 3H-alvocidib-0.12    | 5/71    | $2.85 \times 10^{-4}$ | $2.74 \times 10^{-3}$ |
| LJP006 BT20 24H-alvocidib-10      | 5/78    | $4.42 \times 10^{-4}$ | $3.96 \times 10^{-3}$ |
| LJP006 LNCAP 24H-alvocidib-3.33   | 5/80    | $4.97 \times 10^{-4}$ | $4.36 \times 10^{-3}$ |
| LJP006 HS578T 3H-alvocidib-0.12   | 5/85    | $6.56 \times 10^{-4}$ | $5.52 \times 10^{-3}$ |
| LJP006 SKBR3 24H-alvocidib-3.33   | 6/129   | $6.66 \times 10^{-4}$ | $5.60 \times 10^{-3}$ |
| LJP006 HME1 3H-alvocidib-0.37     | 4/51    | $7.89 \times 10^{-4}$ | $6.42 \times 10^{-3}$ |
| LJP006 HEPG2 24H-alvocidib-10     | 5/91    | $8.94 \times 10^{-4}$ | $7.15 \times 10^{-3}$ |
| LJP006 LNCAP 24H-alvocidib-0.04   | 6/140   | $1.02 \times 10^{-3}$ | $7.97 \times 10^{-3}$ |
| LJP006 MCF10A 24H-alvocidib-3.33  | 6/146   | $1.27 \times 10^{-3}$ | $9.48 \times 10^{-3}$ |
| LJP006 MCF7 3H-alvocidib-0.37     | 4/60    | $1.45 \times 10^{-3}$ | $1.06 \times 10^{-2}$ |
| LJP006 PC3 24H-alvocidib-10       | 6/152   | $1.56 \times 10^{-3}$ | $1.12 \times 10^{-2}$ |
| LJP006 HS578T 3H-alvocidib-10     | 4/63    | $1.74 \times 10^{-3}$ | $1.23 \times 10^{-2}$ |
| LJP006 LNCAP 3H-alvocidib-0.37    | 4/63    | $1.74 \times 10^{-3}$ | $1.23 \times 10^{-2}$ |
| LJP006 BT20 24H-alvocidib-0.12    | 5/106   | $1.77 \times 10^{-3}$ | $1.24 \times 10^{-2}$ |
| LJP006 HS578T 3H-alvocidib-0.04   | 4/64    | $1.85 \times 10^{-3}$ | $1.28 \times 10^{-2}$ |
| LJP006 MCF7 3H-alvocidib-3.33     | 4/67    | $2.19 \times 10^{-3}$ | $1.48 \times 10^{-2}$ |
| LJP006 MDAMB231 3H-alvocidib-1.11 | 4/67    | $2.19 \times 10^{-3}$ | $1.48 \times 10^{-2}$ |
| LJP006 SKBR3 3H-alvocidib-1.11    | 4/67    | $2.19 \times 10^{-3}$ | $1.48 \times 10^{-2}$ |
| LJP006 HCC515 24H-alvocidib-10    | 7/221   | $2.27 \times 10^{-3}$ | $1.53 \times 10^{-2}$ |
| LJP006 MCF7 3H-alvocidib-0.04     | 3/37    | $3.37 \times 10^{-3}$ | $2.11 \times 10^{-2}$ |
| LJP006 A549 24H-alvocidib-10      | 6/180   | $3.62 \times 10^{-3}$ | $2.24 \times 10^{-2}$ |
| LJP006 MCF7 24H-alvocidib-0.04    | 3/47    | $6.63 \times 10^{-3}$ | $3.57 \times 10^{-2}$ |
| LJP006 MCF7 3H-alvocidib-0.12     | 3/47    | $6.63 \times 10^{-3}$ | $3.56 \times 10^{-2}$ |
| LJP006 MCF10A 24H-alvocidib-0.12  | 5/146   | $6.94 \times 10^{-3}$ | $3.71 \times 10^{-2}$ |
| LJP006 SKBR3 24H-alvocidib-0.37   | 4/93    | $7.08 \times 10^{-3}$ | $3.76 \times 10^{-2}$ |
| LJP006 HA1E 24H-alvocidib-1.11    | 6/218   | $9.03 \times 10^{-3}$ | $4.56 \times 10^{-2}$ |
| LJP006 MCF10A 3H-alvocidib-3.33   | 3/54    | $9.73 \times 10^{-3}$ | $4.82 \times 10^{-2}$ |
