# Supplementary material for: A new advanced in silico drug discovery method for novel coronavirus (SARS-CoV-2) with tensor decomposition-based unsupervised feature extraction
Source: PubMed Central journal article supplement (PMC7485840; doi:10.1371/journal.pone.0238907), 2020-09-11
Supplement: pone.0238907.s019.pdf [file pone.0238907.s019.pdf]

S19 Table: Alvocidib significantly affects the expression of the selected 163 genes as evident in the “LINCS L1000 Chem Pert down” category in Enrichr. The last number after the - is dose density.

| Term                               | Overlap | P-value                | Adjusted P-value       |
|------------------------------------|---------|------------------------|------------------------|
| LINCS L1000 Chem Pert down         |         |                        |                        |
| LJP006 SKBR3 24H-alvocidib-0.12    | 18/111  | $1.20 \times 10^{-18}$ | $6.61 \times 10^{-15}$ |
| LJP006 MCF10A 24H-alvocidib-3.33   | 12/92   | $1.18 \times 10^{-11}$ | $1.78 \times 10^{-9}$  |
| LJP006 SKBR3 24H-alvocidib-0.37    | 12/92   | $1.18 \times 10^{-11}$ | $1.78 \times 10^{-9}$  |
| LJP006 SKBR3 24H-alvocidib-10      | 12/95   | $1.74 \times 10^{-11}$ | $2.47 \times 10^{-9}$  |
| LJP006 BT20 24H-alvocidib-0.12     | 13/134  | $7.29 \times 10^{-11}$ | $8.13 \times 10^{-9}$  |
| LJP006 HME1 3H-alvocidib-1.11      | 14/166  | $8.78 \times 10^{-11}$ | $9.35 \times 10^{-9}$  |
| LJP006 MCF10A 24H-alvocidib-0.12   | 11/89   | $1.58 \times 10^{-10}$ | $1.52 \times 10^{-8}$  |
| LJP006 SKBR3 24H-alvocidib-3.33    | 12/115  | $1.71 \times 10^{-10}$ | $1.61 \times 10^{-8}$  |
| LJP006 HME1 3H-alvocidib-3.33      | 14/194  | $6.96 \times 10^{-10}$ | $5.20 \times 10^{-8}$  |
| LJP006 MCF10A 3H-alvocidib-0.37    | 12/143  | $2.16 \times 10^{-9}$  | $1.33 \times 10^{-7}$  |
| LJP006 HCC515 24H-alvocidib-10     | 11/118  | $3.39 \times 10^{-9}$  | $1.94 \times 10^{-7}$  |
| LJP006 HME1 3H-alvocidib-0.37      | 13/194  | $7.11 \times 10^{-9}$  | $3.61 \times 10^{-7}$  |
| LJP006 HS578T 3H-alvocidib-10      | 11/143  | $2.57 \times 10^{-8}$  | $1.04 \times 10^{-6}$  |
| LJP006 HA1E 24H-alvocidib-0.04     | 12/188  | $4.72 \times 10^{-8}$  | $1.78 \times 10^{-6}$  |
| LJP006 SKBR3 24H-alvocidib-1.11    | 9/93    | $6.81 \times 10^{-8}$  | $2.41 \times 10^{-6}$  |
| LJP006 LNCAP 3H-alvocidib-10       | 10/131  | $1.21 \times 10^{-7}$  | $3.94 \times 10^{-6}$  |
| LJP006 SKBR3 3H-alvocidib-1.11     | 9/104   | $1.80 \times 10^{-7}$  | $5.53 \times 10^{-6}$  |
| LJP006 MCF10A 3H-alvocidib-10      | 10/146  | $3.35 \times 10^{-7}$  | $9.25 \times 10^{-6}$  |
| LJP006 MCF7 24H-alvocidib-3.33     | 6/35    | $3.57 \times 10^{-7}$  | $9.71 \times 10^{-6}$  |
| LJP006 HME1 3H-alvocidib-10        | 9/114   | $3.97 \times 10^{-7}$  | $1.06 \times 10^{-5}$  |
| LJP006 BT20 24H-alvocidib-3.33     | 9/115   | $4.27 \times 10^{-7}$  | $1.13 \times 10^{-5}$  |
| LJP006 SKBR3 3H-alvocidib-0.37     | 8/86    | $5.07 \times 10^{-7}$  | $1.29 \times 10^{-5}$  |
| LJP006 A549 24H-alvocidib-10       | 8/94    | $1.01 \times 10^{-6}$  | $2.33 \times 10^{-5}$  |
| LJP006 BT20 24H-alvocidib-10       | 8/94    | $1.01 \times 10^{-6}$  | $2.32 \times 10^{-5}$  |
| LJP006 SKBR3 3H-alvocidib-10       | 8/97    | $1.28 \times 10^{-6}$  | $2.85 \times 10^{-5}$  |
| LJP006 HME1 24H-alvocidib-0.12     | 8/99    | $1.50 \times 10^{-6}$  | $3.23 \times 10^{-5}$  |
| LJP006 LNCAP 24H-alvocidib-10      | 8/101   | $1.74 \times 10^{-6}$  | $3.68 \times 10^{-5}$  |
| LJP006 MCF10A 24H-alvocidib-10     | 7/71    | $1.80 \times 10^{-6}$  | $3.77 \times 10^{-5}$  |
| LJP006 HA1E 24H-alvocidib-10       | 7/72    | $1.98 \times 10^{-6}$  | $4.09 \times 10^{-5}$  |
| LJP006 MCF7 3H-alvocidib-1.11      | 7/74    | $2.39 \times 10^{-6}$  | $4.78 \times 10^{-5}$  |
| LJP006 HME1 3H-alvocidib-0.12      | 9/146   | $3.17 \times 10^{-6}$  | $6.04 \times 10^{-5}$  |
| LJP006 MDAMB231 24H-alvocidib-1.11 | 7/82    | $4.78 \times 10^{-6}$  | $8.68 \times 10^{-5}$  |
| LJP006 MCF7 24H-alvocidib-0.37     | 5/31    | $4.84 \times 10^{-6}$  | $8.76 \times 10^{-5}$  |
| LJP006 LNCAP 24H-alvocidib-1.11    | 8/116   | $4.94 \times 10^{-6}$  | $8.92 \times 10^{-5}$  |
| LJP006 HA1E 24H-alvocidib-0.12     | 7/83    | $5.18 \times 10^{-6}$  | $9.29 \times 10^{-5}$  |
| LJP006 HS578T 24H-alvocidib-3.33   | 7/83    | $5.18 \times 10^{-6}$  | $9.28 \times 10^{-5}$  |
| LJP006 MCF10A 3H-alvocidib-0.12    | 8/120   | $6.35 \times 10^{-6}$  | $1.10 \times 10^{-4}$  |
| LJP006 MCF10A 3H-alvocidib-1.11    | 8/122   | $7.18 \times 10^{-6}$  | $1.22 \times 10^{-4}$  |
| LJP006 LNCAP 24H-alvocidib-3.33    | 6/58    | $7.62 \times 10^{-6}$  | $1.29 \times 10^{-4}$  |
| LJP006 HA1E 24H-alvocidib-0.37     | 7/89    | $8.26 \times 10^{-6}$  | $1.37 \times 10^{-4}$  |
| LJP006 MDAMB231 24H-alvocidib-10   | 6/61    | $1.02 \times 10^{-5}$  | $1.65 \times 10^{-4}$  |
| LJP006 SKBR3 24H-alvocidib-0.04    | 7/99    | $1.67 \times 10^{-5}$  | $2.49 \times 10^{-4}$  |
| LJP006 HT29 24H-alvocidib-10       | 6/67    | $1.77 \times 10^{-5}$  | $2.61 \times 10^{-4}$  |
| LJP006 HME1 24H-alvocidib-0.37     | 7/103   | $2.16 \times 10^{-5}$  | $3.12 \times 10^{-4}$  |
| LJP006 HS578T 3H-alvocidib-1.11    | 7/105   | $2.45 \times 10^{-5}$  | $3.49 \times 10^{-4}$  |
| LJP006 HEPG2 24H-alvocidib-10      | 6/75    | $3.38 \times 10^{-5}$  | $4.58 \times 10^{-4}$  |
| LJP006 LNCAP 3H-alvocidib-0.37     | 7/111   | $3.50 \times 10^{-5}$  | $4.73 \times 10^{-4}$  |
| LJP006 LNCAP 24H-alvocidib-0.12    | 7/112   | $3.71 \times 10^{-5}$  | $4.94 \times 10^{-4}$  |
| LJP006 MDAMB231 3H-alvocidib-3.33  | 7/114   | $4.16 \times 10^{-5}$  | $5.44 \times 10^{-4}$  |
| LJP006 HS578T 3H-alvocidib-0.12    | 8/156   | $4.28 \times 10^{-5}$  | $5.56 \times 10^{-4}$  |
| LJP006 MDAMB231 3H-alvocidib-0.12  | 8/156   | $4.28 \times 10^{-5}$  | $5.56 \times 10^{-4}$  |
| LJP006 MDAMB231 3H-alvocidib-0.37  | 7/120   | $5.77 \times 10^{-5}$  | $7.17 \times 10^{-4}$  |
| LJP006 MCF10A 3H-alvocidib-0.04    | 7/123   | $6.75 \times 10^{-5}$  | $8.16 \times 10^{-4}$  |
| LJP006 BT20 24H-alvocidib-0.37     | 7/124   | $7.11 \times 10^{-5}$  | $8.51 \times 10^{-4}$  |

S19 Table: (Continued)

|                                     |       |                       |                       |
|-------------------------------------|-------|-----------------------|-----------------------|
| LJP006 HA1E 24H- Alvocidib-3.33     | 6/86  | $7.33 \times 10^{-5}$ | $8.75 \times 10^{-4}$ |
| LJP006 MCF7 3H- Alvocidib-3.33      | 7/125 | $7.48 \times 10^{-5}$ | $8.86 \times 10^{-4}$ |
| LJP006 HS578T 24H- Alvocidib-0.37   | 6/89  | $8.89 \times 10^{-5}$ | $1.02 \times 10^{-3}$ |
| LJP006 MCF7 24H- Alvocidib-10       | 5/57  | $1.01 \times 10^{-4}$ | $1.13 \times 10^{-3}$ |
| LJP006 HS578T 24H- Alvocidib-1.11   | 6/91  | $1.01 \times 10^{-4}$ | $1.12 \times 10^{-3}$ |
| LJP006 MCF7 3H- Alvocidib-10        | 7/132 | $1.05 \times 10^{-4}$ | $1.18 \times 10^{-3}$ |
| LJP006 BT20 3H- Alvocidib-0.37      | 5/62  | $1.50 \times 10^{-4}$ | $1.59 \times 10^{-3}$ |
| LJP006 LNCAP 24H- Alvocidib-0.37    | 7/140 | $1.52 \times 10^{-4}$ | $1.60 \times 10^{-3}$ |
| LJP006 MCF10A 3H- Alvocidib-3.33    | 7/143 | $1.74 \times 10^{-4}$ | $1.79 \times 10^{-3}$ |
| LJP006 HS578T 3H- Alvocidib-3.33    | 7/148 | $2.14 \times 10^{-4}$ | $2.15 \times 10^{-3}$ |
| LJP006 MDAMB231 3H- Alvocidib-1.11  | 7/149 | $2.23 \times 10^{-4}$ | $2.23 \times 10^{-3}$ |
| LJP006 MCF7 3H- Alvocidib-0.37      | 6/108 | $2.58 \times 10^{-4}$ | $2.51 \times 10^{-3}$ |
| LJP006 LNCAP 3H- Alvocidib-1.11     | 6/112 | $3.14 \times 10^{-4}$ | $2.96 \times 10^{-3}$ |
| LJP006 BT20 24H- Alvocidib-0.04     | 5/73  | $3.25 \times 10^{-4}$ | $3.06 \times 10^{-3}$ |
| LJP006 SKBR3 3H- Alvocidib-0.12     | 6/113 | $3.29 \times 10^{-4}$ | $3.08 \times 10^{-3}$ |
| LJP006 MCF7 3H- Alvocidib-0.12      | 6/121 | $4.75 \times 10^{-4}$ | $4.18 \times 10^{-3}$ |
| LJP006 MDAMB231 24H- Alvocidib-3.33 | 5/82  | $5.56 \times 10^{-4}$ | $4.77 \times 10^{-3}$ |
| LJP006 HME1 24H- Alvocidib-3.33     | 5/83  | $5.88 \times 10^{-4}$ | $4.99 \times 10^{-3}$ |
| LJP006 LNCAP 3H- Alvocidib-0.12     | 6/127 | $6.13 \times 10^{-4}$ | $5.19 \times 10^{-3}$ |
| LJP006 MDAMB231 3H- Alvocidib-0.04  | 5/87  | $7.29 \times 10^{-4}$ | $6.01 \times 10^{-3}$ |
| LJP006 LNCAP 24H- Alvocidib-0.04    | 8/238 | $7.64 \times 10^{-4}$ | $6.24 \times 10^{-3}$ |
| LJP006 HS578T 24H- Alvocidib-0.04   | 4/51  | $7.89 \times 10^{-4}$ | $6.40 \times 10^{-3}$ |
| LJP006 HS578T 24H- Alvocidib-0.12   | 5/89  | $8.09 \times 10^{-4}$ | $6.54 \times 10^{-3}$ |
| LJP006 MDAMB231 3H- Alvocidib-10    | 6/139 | $9.84 \times 10^{-4}$ | $7.70 \times 10^{-3}$ |
| LJP006 HS578T 3H- Alvocidib-0.37    | 6/141 | $1.06 \times 10^{-3}$ | $8.19 \times 10^{-3}$ |
| LJP006 BT20 24H- Alvocidib-1.11     | 5/95  | $1.09 \times 10^{-3}$ | $8.35 \times 10^{-3}$ |
| LJP006 HME1 3H- Alvocidib-0.04      | 6/142 | $1.10 \times 10^{-3}$ | $8.44 \times 10^{-3}$ |
| LJP006 SKBR3 3H- Alvocidib-0.04     | 4/59  | $1.37 \times 10^{-3}$ | $1.01 \times 10^{-2}$ |
| LJP006 HME1 24H- Alvocidib-0.04     | 5/108 | $1.92 \times 10^{-3}$ | $1.35 \times 10^{-2}$ |
| LJP006 A375 24H- Alvocidib-10       | 5/109 | $2.00 \times 10^{-3}$ | $1.39 \times 10^{-2}$ |
| LJP006 BT20 3H- Alvocidib-10        | 3/40  | $4.21 \times 10^{-3}$ | $2.55 \times 10^{-2}$ |
| LJP006 HS578T 24H- Alvocidib-10     | 4/86  | $5.38 \times 10^{-3}$ | $3.10 \times 10^{-2}$ |
| LJP006 HME1 24H- Alvocidib-1.11     | 4/88  | $5.83 \times 10^{-3}$ | $3.31 \times 10^{-2}$ |
| LJP006 HA1E 24H- Alvocidib-1.11     | 4/89  | $6.07 \times 10^{-3}$ | $3.40 \times 10^{-2}$ |
| LJP006 MDAMB231 24H- Alvocidib-0.37 | 4/92  | $6.82 \times 10^{-3}$ | $3.73 \times 10^{-2}$ |
| LJP006 MDAMB231 24H- Alvocidib-0.04 | 3/48  | $7.03 \times 10^{-3}$ | $3.82 \times 10^{-2}$ |
| LJP006 MCF7 24H- Alvocidib-0.12     | 2/17  | $8.29 \times 10^{-3}$ | $4.36 \times 10^{-2}$ |
| LJP006 HS578T 3H- Alvocidib-0.04    | 4/99  | $8.79 \times 10^{-3}$ | $4.55 \times 10^{-2}$ |
| LJP006 LNCAP 3H- Alvocidib-3.33     | 5/155 | $8.87 \times 10^{-3}$ | $4.59 \times 10^{-2}$ |
| LJP006 BT20 3H- Alvocidib-0.12      | 3/53  | $9.24 \times 10^{-3}$ | $4.75 \times 10^{-2}$ |
