# Supplementary material for: A new advanced in silico drug discovery method for novel coronavirus (SARS-CoV-2) with tensor decomposition-based unsupervised feature extraction
Source: PubMed Central journal article supplement (PMC7485840; doi:10.1371/journal.pone.0238907), 2020-09-11
Supplement: pone.0238907.s020.pdf [file pone.0238907.s020.pdf]

S20 Table: Mitoxantrone significantly affects the expression of the selected 163 genes as evident in the “LINCS L1000 Chem Pert up” category in Enrichr. The last number after the - is dose density.

| Term                                  | Overlap | P-value                | Adjusted P-value       |
|---------------------------------------|---------|------------------------|------------------------|
| LINCS L1000 Chem Pert up              |         |                        |                        |
| LJP005 HEPG2 24H-mitoxantrone-0.37    | 19/142  | $5.43 \times 10^{-18}$ | $1.06 \times 10^{-14}$ |
| LJP005 HEPG2 24H-mitoxantrone-0.12    | 14/110  | $3.03 \times 10^{-13}$ | $9.65 \times 10^{-11}$ |
| LJP006 MCF7 24H-mitoxantrone-0.37     | 12/91   | $1.03 \times 10^{-11}$ | $1.81 \times 10^{-9}$  |
| LJP006 MCF7 24H-mitoxantrone-3.33     | 13/122  | $2.20 \times 10^{-11}$ | $3.30 \times 10^{-9}$  |
| LJP005 HEPG2 24H-mitoxantrone-1.11    | 13/130  | $4.96 \times 10^{-11}$ | $6.44 \times 10^{-9}$  |
| LJP006 SKBR3 24H-mitoxantrone-0.04    | 10/71   | $2.95 \times 10^{-10}$ | $2.72 \times 10^{-8}$  |
| LJP006 MCF10A 24H-mitoxantrone-3.33   | 12/155  | $5.43 \times 10^{-9}$  | $3.04 \times 10^{-7}$  |
| LJP005 MCF7 24H-mitoxantrone-0.12     | 8/60    | $2.92 \times 10^{-8}$  | $1.27 \times 10^{-6}$  |
| LJP006 HEPG2 24H-mitoxantrone-0.37    | 9/94    | $7.48 \times 10^{-8}$  | $2.82 \times 10^{-6}$  |
| LJP005 SKBR3 24H-mitoxantrone-0.12    | 8/78    | $2.37 \times 10^{-7}$  | $7.36 \times 10^{-6}$  |
| LJP006 A375 24H-mitoxantrone-10       | 9/108   | $2.50 \times 10^{-7}$  | $7.71 \times 10^{-6}$  |
| LJP005 MCF10A 24H-mitoxantrone-1.11   | 9/111   | $3.16 \times 10^{-7}$  | $9.41 \times 10^{-6}$  |
| LJP005 MDAMB231 3H-mitoxantrone-1.11  | 7/56    | $3.48 \times 10^{-7}$  | $1.02 \times 10^{-5}$  |
| LJP006 HEPG2 24H-mitoxantrone-3.33    | 11/189  | $4.41 \times 10^{-7}$  | $1.24 \times 10^{-5}$  |
| LJP006 MCF7 24H-mitoxantrone-1.11     | 9/123   | $7.57 \times 10^{-7}$  | $1.97 \times 10^{-5}$  |
| LJP006 SKBR3 24H-mitoxantrone-1.11    | 9/124   | $8.10 \times 10^{-7}$  | $2.08 \times 10^{-5}$  |
| LJP006 SKBR3 24H-mitoxantrone-0.12    | 8/92    | $8.53 \times 10^{-7}$  | $2.17 \times 10^{-5}$  |
| LJP006 HA1E 24H-mitoxantrone-0.12     | 10/163  | $9.26 \times 10^{-7}$  | $2.33 \times 10^{-5}$  |
| LJP006 SKBR3 24H-mitoxantrone-0.37    | 8/94    | $1.01 \times 10^{-6}$  | $2.48 \times 10^{-5}$  |
| LJP006 BT20 24H-mitoxantrone-0.37     | 10/165  | $1.04 \times 10^{-6}$  | $2.55 \times 10^{-5}$  |
| LJP006 SKBR3 3H-mitoxantrone-1.11     | 7/66    | $1.09 \times 10^{-6}$  | $2.66 \times 10^{-5}$  |
| LJP006 MDAMB231 3H-mitoxantrone-1.11  | 6/43    | $1.27 \times 10^{-6}$  | $3.01 \times 10^{-5}$  |
| LJP005 MCF10A 24H-mitoxantrone-10     | 8/102   | $1.88 \times 10^{-6}$  | $4.16 \times 10^{-5}$  |
| LJP007 MCF7 24H-mitoxantrone-10       | 8/103   | $2.02 \times 10^{-6}$  | $4.39 \times 10^{-5}$  |
| LJP005 MCF7 24H-mitoxantrone-1.11     | 8/110   | $3.32 \times 10^{-6}$  | $6.67 \times 10^{-5}$  |
| LJP006 SKBR3 3H-mitoxantrone-0.37     | 7/79    | $3.72 \times 10^{-6}$  | $7.29 \times 10^{-5}$  |
| LJP005 HEPG2 24H-mitoxantrone-3.33    | 10/194  | $4.46 \times 10^{-6}$  | $8.52 \times 10^{-5}$  |
| LJP006 PC3 24H-mitoxantrone-0.37      | 6/53    | $4.47 \times 10^{-6}$  | $8.52 \times 10^{-5}$  |
| LJP005 HA1E 24H-mitoxantrone-0.37     | 9/155   | $5.17 \times 10^{-6}$  | $9.71 \times 10^{-5}$  |
| LJP006 HCC515 24H-mitoxantrone-1.11   | 9/156   | $5.45 \times 10^{-6}$  | $1.02 \times 10^{-4}$  |
| LJP006 BT20 24H-mitoxantrone-1.11     | 9/157   | $5.74 \times 10^{-6}$  | $1.06 \times 10^{-4}$  |
| LJP005 HCC515 24H-mitoxantrone-0.37   | 8/123   | $7.63 \times 10^{-6}$  | $1.34 \times 10^{-4}$  |
| LJP006 BT20 24H-mitoxantrone-3.33     | 8/137   | $1.68 \times 10^{-5}$  | $2.55 \times 10^{-4}$  |
| LJP006 PC3 24H-mitoxantrone-10        | 8/139   | $1.87 \times 10^{-5}$  | $2.78 \times 10^{-4}$  |
| LJP005 MCF7 24H-mitoxantrone-10       | 6/68    | $1.93 \times 10^{-5}$  | $2.86 \times 10^{-4}$  |
| LJP005 HA1E 24H-mitoxantrone-0.04     | 6/70    | $2.28 \times 10^{-5}$  | $3.31 \times 10^{-4}$  |
| LJP006 MCF7 24H-mitoxantrone-0.12     | 6/71    | $2.47 \times 10^{-5}$  | $3.55 \times 10^{-4}$  |
| LJP005 SKBR3 3H-mitoxantrone-0.12     | 5/45    | $3.17 \times 10^{-5}$  | $4.41 \times 10^{-4}$  |
| LJP006 A549 24H-mitoxantrone-3.33     | 8/152   | $3.56 \times 10^{-5}$  | $4.84 \times 10^{-4}$  |
| LJP007 PC3 24H-mitoxantrone-10        | 7/115   | $4.40 \times 10^{-5}$  | $5.80 \times 10^{-4}$  |
| LJP005 HCC515 24H-mitoxantrone-3.33   | 8/158   | $4.68 \times 10^{-5}$  | $6.13 \times 10^{-4}$  |
| LJP005 MCF10A 3H-mitoxantrone-3.33    | 5/49    | $4.83 \times 10^{-5}$  | $6.29 \times 10^{-4}$  |
| LJP006 A549 24H-mitoxantrone-1.11     | 7/119   | $5.47 \times 10^{-5}$  | $6.99 \times 10^{-4}$  |
| LJP009 PC3 24H-mitoxantrone-10        | 8/162   | $5.59 \times 10^{-5}$  | $7.11 \times 10^{-4}$  |
| LJP008 A375 24H-mitoxantrone-10       | 7/120   | $5.77 \times 10^{-5}$  | $7.32 \times 10^{-4}$  |
| LJP005 SKBR3 24H-mitoxantrone-3.33    | 7/120   | $5.77 \times 10^{-5}$  | $7.31 \times 10^{-4}$  |
| LJP006 HEPG2 24H-mitoxantrone-1.11    | 7/120   | $5.77 \times 10^{-5}$  | $7.30 \times 10^{-4}$  |
| LJP005 HA1E 24H-mitoxantrone-0.12     | 7/121   | $6.09 \times 10^{-5}$  | $7.60 \times 10^{-4}$  |
| LJP005 MDAMB231 24H-mitoxantrone-0.37 | 5/52    | $6.45 \times 10^{-5}$  | $7.92 \times 10^{-4}$  |
| LJP005 PC3 24H-mitoxantrone-0.37      | 5/52    | $6.45 \times 10^{-5}$  | $7.91 \times 10^{-4}$  |
| LJP005 SKBR3 3H-mitoxantrone-1.11     | 6/85    | $6.87 \times 10^{-5}$  | $8.38 \times 10^{-4}$  |
| LJP006 LNCAP 24H-mitoxantrone-0.37    | 6/86    | $7.33 \times 10^{-5}$  | $8.85 \times 10^{-4}$  |
| LJP006 HME1 24H-mitoxantrone-1.11     | 7/125   | $7.48 \times 10^{-5}$  | $8.99 \times 10^{-4}$  |
| LJP006 SKBR3 3H-mitoxantrone-0.12     | 5/54    | $7.75 \times 10^{-5}$  | $9.26 \times 10^{-4}$  |

S20 Table: (Continued)

|                                                   |       |                       |                       |
|---------------------------------------------------|-------|-----------------------|-----------------------|
| LJP005 HCC515 24H-mitoxantrone-1.11               | 7/126 | $7.87 \times 10^{-5}$ | $9.37 \times 10^{-4}$ |
| CPC020 PC3 6H-mitoxantrone dihydrochloride-10.0   | 6/89  | $8.89 \times 10^{-5}$ | $1.04 \times 10^{-3}$ |
| LJP005 SKBR3 3H-mitoxantrone-0.37                 | 5/56  | $9.23 \times 10^{-5}$ | $1.07 \times 10^{-3}$ |
| LJP005 A549 24H-mitoxantrone-3.33                 | 8/182 | $1.26 \times 10^{-4}$ | $1.40 \times 10^{-3}$ |
| LJP006 HA1E 24H-mitoxantrone-0.37                 | 8/183 | $1.31 \times 10^{-4}$ | $1.43 \times 10^{-3}$ |
| CPC020 PC3 24H-mitoxantrone dihydrochloride-10.0  | 8/189 | $1.64 \times 10^{-4}$ | $1.72 \times 10^{-3}$ |
| LJP005 A375 24H-mitoxantrone-0.12                 | 7/145 | $1.89 \times 10^{-4}$ | $1.93 \times 10^{-3}$ |
| LJP005 MCF10A 24H-mitoxantrone-0.37               | 6/106 | $2.33 \times 10^{-4}$ | $2.31 \times 10^{-3}$ |
| LJP006 HME1 3H-mitoxantrone-3.33                  | 5/70  | $2.67 \times 10^{-4}$ | $2.60 \times 10^{-3}$ |
| LJP006 A549 24H-mitoxantrone-0.12                 | 6/109 | $2.71 \times 10^{-4}$ | $2.63 \times 10^{-3}$ |
| LJP006 HT29 24H-mitoxantrone-0.37                 | 4/39  | $2.80 \times 10^{-4}$ | $2.71 \times 10^{-3}$ |
| LJP006 SKBR3 3H-mitoxantrone-3.33                 | 4/39  | $2.80 \times 10^{-4}$ | $2.71 \times 10^{-3}$ |
| LJP006 MCF10A 3H-mitoxantrone-0.12                | 4/40  | $3.09 \times 10^{-4}$ | $2.93 \times 10^{-3}$ |
| LJP006 A549 24H-mitoxantrone-0.37                 | 6/112 | $3.14 \times 10^{-4}$ | $2.97 \times 10^{-3}$ |
| LJP006 HCC515 24H-mitoxantrone-3.33               | 7/160 | $3.45 \times 10^{-4}$ | $3.22 \times 10^{-3}$ |
| LJP006 MDAMB231 3H-mitoxantrone-0.37              | 5/74  | $3.46 \times 10^{-4}$ | $3.21 \times 10^{-3}$ |
| LJP006 MCF10A 3H-mitoxantrone-0.37                | 4/42  | $3.74 \times 10^{-4}$ | $3.44 \times 10^{-3}$ |
| LJP005 SKBR3 24H-mitoxantrone-1.11                | 6/117 | $3.97 \times 10^{-4}$ | $3.62 \times 10^{-3}$ |
| LJP006 PC3 24H-mitoxantrone-1.11                  | 6/117 | $3.97 \times 10^{-4}$ | $3.62 \times 10^{-3}$ |
| LJP005 MCF10A 3H-mitoxantrone-1.11                | 4/43  | $4.10 \times 10^{-4}$ | $3.72 \times 10^{-3}$ |
| LJP006 HCC515 24H-mitoxantrone-0.37               | 6/121 | $4.75 \times 10^{-4}$ | $4.20 \times 10^{-3}$ |
| LJP007 HT29 24H-mitoxantrone-10                   | 6/123 | $5.18 \times 10^{-4}$ | $4.53 \times 10^{-3}$ |
| LJP006 MDAMB231 3H-mitoxantrone-3.33              | 4/46  | $5.31 \times 10^{-4}$ | $4.62 \times 10^{-3}$ |
| LJP005 HT29 24H-mitoxantrone-0.37                 | 5/82  | $5.56 \times 10^{-4}$ | $4.82 \times 10^{-3}$ |
| LJP005 MCF7 24H-mitoxantrone-0.37                 | 5/82  | $5.56 \times 10^{-4}$ | $4.82 \times 10^{-3}$ |
| LJP005 A549 24H-mitoxantrone-10                   | 7/175 | $5.90 \times 10^{-4}$ | $5.03 \times 10^{-3}$ |
| LJP006 HA1E 24H-mitoxantrone-0.04                 | 6/127 | $6.13 \times 10^{-4}$ | $5.22 \times 10^{-3}$ |
| LJP005 HS578T 3H-mitoxantrone-0.37                | 4/49  | $6.77 \times 10^{-4}$ | $5.68 \times 10^{-3}$ |
| CPC020 A375 6H-mitoxantrone dihydrochloride-10.0  | 5/86  | $6.92 \times 10^{-4}$ | $5.79 \times 10^{-3}$ |
| CPC005 HA1E 24H-mitoxantrone dihydrochloride-10.0 | 6/131 | $7.22 \times 10^{-4}$ | $6.02 \times 10^{-3}$ |
| LJP005 MCF7 24H-mitoxantrone-3.33                 | 6/131 | $7.22 \times 10^{-4}$ | $6.01 \times 10^{-3}$ |
| LJP006 A375 24H-mitoxantrone-3.33                 | 5/87  | $7.29 \times 10^{-4}$ | $6.06 \times 10^{-3}$ |
| LJP006 A549 24H-mitoxantrone-10                   | 7/183 | $7.69 \times 10^{-4}$ | $6.28 \times 10^{-3}$ |
| LJP005 SKBR3 3H-mitoxantrone-3.33                 | 4/55  | $1.05 \times 10^{-3}$ | $8.15 \times 10^{-3}$ |
| LJP005 HS578T 24H-mitoxantrone-3.33               | 6/141 | $1.06 \times 10^{-3}$ | $8.20 \times 10^{-3}$ |
| LJP006 HEPG2 24H-mitoxantrone-0.12                | 4/60  | $1.45 \times 10^{-3}$ | $1.06 \times 10^{-2}$ |
| LJP006 HS578T 24H-mitoxantrone-0.12               | 4/60  | $1.45 \times 10^{-3}$ | $1.06 \times 10^{-2}$ |
| CPC005 A375 24H-mitoxantrone dihydrochloride-10.0 | 7/209 | $1.66 \times 10^{-3}$ | $1.18 \times 10^{-2}$ |
| LJP009 MCF7 24H-mitoxantrone-10                   | 4/63  | $1.74 \times 10^{-3}$ | $1.23 \times 10^{-2}$ |
| LJP008 MCF7 24H-mitoxantrone-10                   | 4/63  | $1.74 \times 10^{-3}$ | $1.23 \times 10^{-2}$ |
| LJP006 A375 24H-mitoxantrone-1.11                 | 5/107 | $1.84 \times 10^{-3}$ | $1.29 \times 10^{-2}$ |
| CPC005 PC3 24H-mitoxantrone dihydrochloride-10.0  | 6/158 | $1.89 \times 10^{-3}$ | $1.32 \times 10^{-2}$ |
| LJP005 SKBR3 24H-mitoxantrone-0.04                | 4/65  | $1.96 \times 10^{-3}$ | $1.35 \times 10^{-2}$ |
| LJP006 SKBR3 24H-mitoxantrone-10                  | 5/109 | $2.00 \times 10^{-3}$ | $1.38 \times 10^{-2}$ |
| LJP006 HT29 24H-mitoxantrone-3.33                 | 6/167 | $2.50 \times 10^{-3}$ | $1.66 \times 10^{-2}$ |
| LJP005 BT20 24H-mitoxantrone-10                   | 4/70  | $2.57 \times 10^{-3}$ | $1.70 \times 10^{-2}$ |
| CPD001 PC3 24H-mitoxantrone dihydrochloride-10.0  | 6/169 | $2.65 \times 10^{-3}$ | $1.74 \times 10^{-2}$ |
| LJP005 A549 24H-mitoxantrone-1.11                 | 5/117 | $2.72 \times 10^{-3}$ | $1.78 \times 10^{-2}$ |
| LJP006 LNCAP 24H-mitoxantrone-0.04                | 4/72  | $2.84 \times 10^{-3}$ | $1.85 \times 10^{-2}$ |
| LJP006 HEPG2 24H-mitoxantrone-10                  | 6/172 | $2.90 \times 10^{-3}$ | $1.87 \times 10^{-2}$ |
| LJP006 HME1 3H-mitoxantrone-0.37                  | 3/36  | $3.11 \times 10^{-3}$ | $1.98 \times 10^{-2}$ |

S20 Table: (Continued)

|                                                  |       |                       |                       |
|--------------------------------------------------|-------|-----------------------|-----------------------|
| LJP006 SKBR3 24H-mitoxantrone-3.33               | 5/121 | $3.15 \times 10^{-3}$ | $1.99 \times 10^{-2}$ |
| LJP005 HA1E 24H-mitoxantrone-3.33                | 5/125 | $3.62 \times 10^{-3}$ | $2.24 \times 10^{-2}$ |
| LJP009 A375 24H-mitoxantrone-10                  | 4/77  | $3.63 \times 10^{-3}$ | $2.24 \times 10^{-2}$ |
| LJP005 MCF7 3H-mitoxantrone-3.33                 | 4/78  | $3.80 \times 10^{-3}$ | $2.32 \times 10^{-2}$ |
| LJP007 A375 24H-mitoxantrone-10                  | 5/127 | $3.87 \times 10^{-3}$ | $2.35 \times 10^{-2}$ |
| LJP005 HS578T 3H-mitoxantrone-3.33               | 3/39  | $3.92 \times 10^{-3}$ | $2.38 \times 10^{-2}$ |
| LJP008 A549 24H-mitoxantrone-10                  | 5/129 | $4.14 \times 10^{-3}$ | $2.49 \times 10^{-2}$ |
| LJP006 LNCAP 24H-mitoxantrone-1.11               | 5/131 | $4.41 \times 10^{-3}$ | $2.61 \times 10^{-2}$ |
| LJP005 HT29 24H-mitoxantrone-10                  | 5/134 | $4.86 \times 10^{-3}$ | $2.80 \times 10^{-2}$ |
| CPC020 HT29 6H-mitoxantrone dihydrochloride-10.0 | 3/43  | $5.16 \times 10^{-3}$ | $2.94 \times 10^{-2}$ |
| LJP006 MCF7 24H-mitoxantrone-10                  | 4/87  | $5.60 \times 10^{-3}$ | $3.13 \times 10^{-2}$ |
| LJP006 BT20 24H-mitoxantrone-0.12                | 4/88  | $5.83 \times 10^{-3}$ | $3.24 \times 10^{-2}$ |
| LJP006 HS578T 3H-mitoxantrone-10                 | 3/46  | $6.24 \times 10^{-3}$ | $3.40 \times 10^{-2}$ |
| LJP006 MCF10A 3H-mitoxantrone-3.33               | 3/50  | $7.87 \times 10^{-3}$ | $4.09 \times 10^{-2}$ |
| LJP006 MDAMB231 24H-mitoxantrone-0.12            | 3/50  | $7.87 \times 10^{-3}$ | $4.09 \times 10^{-2}$ |
| CPC005 MCF7 6H-mitoxantrone dihydrochloride-10.0 | 4/96  | $7.90 \times 10^{-3}$ | $4.10 \times 10^{-2}$ |
| LJP005 HT29 24H-mitoxantrone-1.11                | 4/96  | $7.90 \times 10^{-3}$ | $4.09 \times 10^{-2}$ |
| LJP005 HS578T 24H-mitoxantrone-0.37              | 5/152 | $8.19 \times 10^{-3}$ | $4.22 \times 10^{-2}$ |
| LJP005 MDAMB231 3H-mitoxantrone-3.33             | 2/17  | $8.29 \times 10^{-3}$ | $4.26 \times 10^{-2}$ |
| LJP006 HT29 24H-mitoxantrone-10                  | 4/98  | $8.49 \times 10^{-3}$ | $4.32 \times 10^{-2}$ |
| LJP006 MCF10A 3H-mitoxantrone-1.11               | 3/52  | $8.77 \times 10^{-3}$ | $4.44 \times 10^{-2}$ |
| LJP005 MCF10A 24H-mitoxantrone-3.33              | 4/100 | $9.10 \times 10^{-3}$ | $4.58 \times 10^{-2}$ |
