# Supplementary material for: A new advanced in silico drug discovery method for novel coronavirus (SARS-CoV-2) with tensor decomposition-based unsupervised feature extraction
Source: PubMed Central journal article supplement (PMC7485840; doi:10.1371/journal.pone.0238907), 2020-09-11
Supplement: pone.0238907.s021.pdf [file pone.0238907.s021.pdf]

S21 Table: Mitoxantrone significantly affects the expression of the selected 163 genes as evident in the “LINCS L1000 Chem Pert down” category in Enrichr. The last number after the - is dose density.

| Term                                | Overlap | P-value                | Adjusted P-value       |
|-------------------------------------|---------|------------------------|------------------------|
| LINCS L1000 Chem Pert down          |         |                        |                        |
| LJP005 HCC515 24H-mitoxantrone-0.12 | 17/120  | $1.22 \times 10^{-16}$ | $2.02 \times 10^{-13}$ |
| LJP007 HT29 24H-mitoxantrone-10     | 15/123  | $7.94 \times 10^{-14}$ | $3.13 \times 10^{-11}$ |
| LJP005 HEPG2 24H-mitoxantrone-10    | 13/82   | $1.18 \times 10^{-13}$ | $4.40 \times 10^{-11}$ |
| LJP005 SKBR3 24H-mitoxantrone-10    | 12/70   | $4.03 \times 10^{-13}$ | $1.24 \times 10^{-10}$ |
| LJP005 BT20 3H-mitoxantrone-3.33    | 10/40   | $6.72 \times 10^{-13}$ | $1.89 \times 10^{-10}$ |
| LJP008 PC3 24H-mitoxantrone-10      | 15/146  | $1.02 \times 10^{-12}$ | $2.69 \times 10^{-10}$ |
| LJP006 SKBR3 24H-mitoxantrone-3.33  | 14/120  | $1.03 \times 10^{-12}$ | $2.68 \times 10^{-10}$ |
| LJP005 A549 24H-mitoxantrone-3.33   | 16/185  | $2.53 \times 10^{-12}$ | $5.42 \times 10^{-10}$ |
| LJP006 HCC515 24H-mitoxantrone-0.12 | 11/82   | $6.38 \times 10^{-11}$ | $7.36 \times 10^{-9}$  |
| LJP006 HEPG2 24H-mitoxantrone-10    | 11/87   | $1.23 \times 10^{-10}$ | $1.24 \times 10^{-8}$  |
| LJP005 SKBR3 24H-mitoxantrone-3.33  | 12/115  | $1.71 \times 10^{-10}$ | $1.63 \times 10^{-8}$  |
| LJP006 HCC515 24H-mitoxantrone-0.37 | 11/92   | $2.28 \times 10^{-10}$ | $2.08 \times 10^{-8}$  |
| LJP005 SKBR3 3H-mitoxantrone-10     | 9/52    | $3.46 \times 10^{-10}$ | $2.94 \times 10^{-8}$  |
| LJP005 HA1E 24H-mitoxantrone-10     | 11/98   | $4.56 \times 10^{-10}$ | $3.66 \times 10^{-8}$  |
| LJP006 BT20 24H-mitoxantrone-10     | 10/75   | $5.15 \times 10^{-10}$ | $4.03 \times 10^{-8}$  |
| LJP007 A549 24H-mitoxantrone-10     | 7/25    | $8.91 \times 10^{-10}$ | $6.36 \times 10^{-8}$  |
| LJP007 HCC515 24H-mitoxantrone-10   | 10/82   | $1.27 \times 10^{-9}$  | $8.48 \times 10^{-8}$  |
| LJP005 HT29 24H-mitoxantrone-10     | 11/110  | $1.60 \times 10^{-9}$  | $1.03 \times 10^{-7}$  |
| LJP005 HCC515 24H-mitoxantrone-10   | 11/111  | $1.76 \times 10^{-9}$  | $1.11 \times 10^{-7}$  |
| LJP006 HS578T 24H-mitoxantrone-10   | 10/86   | $2.04 \times 10^{-9}$  | $1.27 \times 10^{-7}$  |
| LJP005 PC3 24H-mitoxantrone-10      | 11/114  | $2.34 \times 10^{-9}$  | $1.43 \times 10^{-7}$  |
| LJP006 HS578T 24H-mitoxantrone-3.33 | 11/115  | $2.57 \times 10^{-9}$  | $1.54 \times 10^{-7}$  |
| LJP009 A375 24H-mitoxantrone-10     | 10/93   | $4.43 \times 10^{-9}$  | $2.44 \times 10^{-7}$  |
| LJP006 HCC515 24H-mitoxantrone-10   | 10/94   | $4.92 \times 10^{-9}$  | $2.65 \times 10^{-7}$  |
| LJP006 HS578T 3H-mitoxantrone-1.11  | 9/74    | $8.93 \times 10^{-9}$  | $4.42 \times 10^{-7}$  |
| LJP009 HCC515 24H-mitoxantrone-10   | 9/75    | $1.01 \times 10^{-8}$  | $4.87 \times 10^{-7}$  |
| LJP009 HT29 24H-mitoxantrone-10     | 10/104  | $1.32 \times 10^{-8}$  | $6.08 \times 10^{-7}$  |
| LJP008 HCC515 24H-mitoxantrone-10   | 9/78    | $1.43 \times 10^{-8}$  | $6.50 \times 10^{-7}$  |
| LJP009 HEPG2 24H-mitoxantrone-10    | 10/108  | $1.91 \times 10^{-8}$  | $8.23 \times 10^{-7}$  |
| LJP006 MCF10A 3H-mitoxantrone-10    | 9/81    | $2.01 \times 10^{-8}$  | $8.50 \times 10^{-7}$  |
| LJP006 MCF7 24H-mitoxantrone-10     | 8/61    | $3.34 \times 10^{-8}$  | $1.31 \times 10^{-6}$  |
| LJP005 HS578T 24H-mitoxantrone-0.37 | 11/152  | $4.83 \times 10^{-8}$  | $1.82 \times 10^{-6}$  |
| LJP008 HEPG2 24H-mitoxantrone-10    | 9/90    | $5.11 \times 10^{-8}$  | $1.91 \times 10^{-6}$  |
| LJP006 HS578T 24H-mitoxantrone-0.37 | 10/122  | $6.17 \times 10^{-8}$  | $2.24 \times 10^{-6}$  |
| LJP008 A549 24H-mitoxantrone-10     | 9/93    | $6.81 \times 10^{-8}$  | $2.42 \times 10^{-6}$  |
| LJP005 HS578T 3H-mitoxantrone-3.33  | 9/93    | $6.81 \times 10^{-8}$  | $2.42 \times 10^{-6}$  |
| LJP005 HCC515 24H-mitoxantrone-3.33 | 9/96    | $8.99 \times 10^{-8}$  | $3.05 \times 10^{-6}$  |
| LJP005 BT20 24H-mitoxantrone-10     | 9/101   | $1.40 \times 10^{-7}$  | $4.48 \times 10^{-6}$  |
| LJP005 HCC515 24H-mitoxantrone-1.11 | 9/101   | $1.40 \times 10^{-7}$  | $4.47 \times 10^{-6}$  |
| LJP006 A375 24H-mitoxantrone-10     | 10/134  | $1.50 \times 10^{-7}$  | $4.75 \times 10^{-6}$  |
| LJP005 HS578T 3H-mitoxantrone-1.11  | 9/102   | $1.52 \times 10^{-7}$  | $4.81 \times 10^{-6}$  |
| LJP005 MCF7 24H-mitoxantrone-10     | 7/50    | $1.56 \times 10^{-7}$  | $4.92 \times 10^{-6}$  |
| LJP008 HA1E 24H-mitoxantrone-10     | 9/103   | $1.66 \times 10^{-7}$  | $5.19 \times 10^{-6}$  |
| LJP006 SKBR3 24H-mitoxantrone-10    | 8/78    | $2.37 \times 10^{-7}$  | $6.96 \times 10^{-6}$  |
| LJP006 LNCAP 3H-mitoxantrone-3.33   | 7/54    | $2.69 \times 10^{-7}$  | $7.74 \times 10^{-6}$  |
| LJP005 HA1E 24H-mitoxantrone-0.37   | 9/109   | $2.70 \times 10^{-7}$  | $7.75 \times 10^{-6}$  |
| LJP005 A549 24H-mitoxantrone-10     | 10/143  | $2.76 \times 10^{-7}$  | $7.88 \times 10^{-6}$  |
| LJP006 HT29 24H-mitoxantrone-10     | 8/80    | $2.89 \times 10^{-7}$  | $8.18 \times 10^{-6}$  |
| LJP006 PC3 24H-mitoxantrone-10      | 9/110   | $2.92 \times 10^{-7}$  | $8.24 \times 10^{-6}$  |
| LJP005 BT20 3H-mitoxantrone-1.11    | 7/55    | $3.07 \times 10^{-7}$  | $8.58 \times 10^{-6}$  |
| LJP006 HA1E 24H-mitoxantrone-1.11   | 9/113   | $3.68 \times 10^{-7}$  | $9.95 \times 10^{-6}$  |
| LJP005 HS578T 24H-mitoxantrone-0.12 | 8/85    | $4.63 \times 10^{-7}$  | $1.21 \times 10^{-5}$  |
| LJP006 HS578T 3H-mitoxantrone-3.33  | 8/92    | $8.53 \times 10^{-7}$  | $2.02 \times 10^{-5}$  |
| LJP005 MCF10A 3H-mitoxantrone-1.11  | 7/65    | $9.82 \times 10^{-7}$  | $2.28 \times 10^{-5}$  |

S21 Table: (Continued)

|                                       |        |                       |                       |
|---------------------------------------|--------|-----------------------|-----------------------|
| LJP006 LNCAP 24H-mitoxantrone-1.11    | 11/207 | $1.09 \times 10^{-6}$ | $2.49 \times 10^{-5}$ |
| LJP006 LNCAP 24H-mitoxantrone-10      | 8/95   | $1.09 \times 10^{-6}$ | $2.50 \times 10^{-5}$ |
| LJP006 SKBR3 3H-mitoxantrone-10       | 7/70   | $1.63 \times 10^{-6}$ | $3.50 \times 10^{-5}$ |
| LJP006 HME1 24H-mitoxantrone-0.37     | 6/46   | $1.91 \times 10^{-6}$ | $3.97 \times 10^{-5}$ |
| LJP005 MDAMB231 3H-mitoxantrone-3.33  | 7/72   | $1.98 \times 10^{-6}$ | $4.10 \times 10^{-5}$ |
| LJP006 MCF10A 3H-mitoxantrone-0.12    | 6/48   | $2.47 \times 10^{-6}$ | $4.92 \times 10^{-5}$ |
| LJP005 HA1E 24H-mitoxantrone-0.12     | 7/77   | $3.13 \times 10^{-6}$ | $6.01 \times 10^{-5}$ |
| LJP006 HCC515 24H-mitoxantrone-3.33   | 6/51   | $3.55 \times 10^{-6}$ | $6.66 \times 10^{-5}$ |
| LJP006 MCF7 3H-mitoxantrone-10        | 6/52   | $3.99 \times 10^{-6}$ | $7.40 \times 10^{-5}$ |
| LJP006 PC3 24H-mitoxantrone-3.33      | 9/152  | $4.41 \times 10^{-6}$ | $8.06 \times 10^{-5}$ |
| LJP009 MCF7 24H-mitoxantrone-10       | 8/117  | $5.26 \times 10^{-6}$ | $9.40 \times 10^{-5}$ |
| LJP005 HA1E 24H-mitoxantrone-3.33     | 7/86   | $6.57 \times 10^{-6}$ | $1.13 \times 10^{-4}$ |
| LJP005 A375 24H-mitoxantrone-10       | 8/121  | $6.76 \times 10^{-6}$ | $1.16 \times 10^{-4}$ |
| LJP008 MCF7 24H-mitoxantrone-10       | 6/57   | $6.88 \times 10^{-6}$ | $1.18 \times 10^{-4}$ |
| LJP009 PC3 24H-mitoxantrone-10        | 9/163  | $7.79 \times 10^{-6}$ | $1.30 \times 10^{-4}$ |
| LJP006 MDAMB231 24H-mitoxantrone-3.33 | 8/124  | $8.10 \times 10^{-6}$ | $1.35 \times 10^{-4}$ |
| LJP007 A375 24H-mitoxantrone-10       | 7/89   | $8.26 \times 10^{-6}$ | $1.37 \times 10^{-4}$ |
| LJP006 A375 24H-mitoxantrone-3.33     | 6/59   | $8.42 \times 10^{-6}$ | $1.40 \times 10^{-4}$ |
| LJP005 HT29 24H-mitoxantrone-0.37     | 6/60   | $9.30 \times 10^{-6}$ | $1.52 \times 10^{-4}$ |
| LJP006 MDAMB231 3H-mitoxantrone-3.33  | 8/127  | $9.66 \times 10^{-6}$ | $1.57 \times 10^{-4}$ |
| LJP005 HS578T 24H-mitoxantrone-1.11   | 7/92   | $1.03 \times 10^{-5}$ | $1.66 \times 10^{-4}$ |
| LJP006 HME1 24H-mitoxantrone-1.11     | 6/62   | $1.13 \times 10^{-5}$ | $1.79 \times 10^{-4}$ |
| LJP005 HEPG2 24H-mitoxantrone-3.33    | 8/132  | $1.28 \times 10^{-5}$ | $2.00 \times 10^{-4}$ |
| LJP006 HA1E 24H-mitoxantrone-0.12     | 8/133  | $1.35 \times 10^{-5}$ | $2.11 \times 10^{-4}$ |
| LJP006 BT20 24H-mitoxantrone-0.12     | 6/64   | $1.36 \times 10^{-5}$ | $2.11 \times 10^{-4}$ |
| LJP005 MCF10A 3H-mitoxantrone-10      | 6/65   | $1.48 \times 10^{-5}$ | $2.27 \times 10^{-4}$ |
| LJP005 HT29 24H-mitoxantrone-1.11     | 7/98   | $1.56 \times 10^{-5}$ | $2.36 \times 10^{-4}$ |
| LJP006 HA1E 24H-mitoxantrone-10       | 5/40   | $1.77 \times 10^{-5}$ | $2.63 \times 10^{-4}$ |
| LJP006 MCF7 3H-mitoxantrone-1.11      | 5/40   | $1.77 \times 10^{-5}$ | $2.63 \times 10^{-4}$ |
| LJP005 A549 24H-mitoxantrone-1.11     | 9/183  | $1.97 \times 10^{-5}$ | $2.88 \times 10^{-4}$ |
| LJP006 MCF10A 24H-mitoxantrone-0.12   | 7/103  | $2.16 \times 10^{-5}$ | $3.12 \times 10^{-4}$ |
| LJP005 MDAMB231 3H-mitoxantrone-1.11  | 6/72   | $2.68 \times 10^{-5}$ | $3.77 \times 10^{-4}$ |
| LJP006 MDAMB231 3H-mitoxantrone-1.11  | 6/73   | $2.90 \times 10^{-5}$ | $4.01 \times 10^{-4}$ |
| LJP005 MDAMB231 3H-mitoxantrone-10    | 6/75   | $3.38 \times 10^{-5}$ | $4.59 \times 10^{-4}$ |
| LJP005 SKBR3 24H-mitoxantrone-1.11    | 6/77   | $3.93 \times 10^{-5}$ | $5.20 \times 10^{-4}$ |
| LJP006 MDAMB231 3H-mitoxantrone-10    | 7/114  | $4.16 \times 10^{-5}$ | $5.43 \times 10^{-4}$ |
| LJP006 HEPG2 24H-mitoxantrone-3.33    | 7/117  | $4.91 \times 10^{-5}$ | $6.23 \times 10^{-4}$ |
| LJP006 BT20 24H-mitoxantrone-1.11     | 6/81   | $5.24 \times 10^{-5}$ | $6.61 \times 10^{-4}$ |
| LJP006 MCF10A 3H-mitoxantrone-3.33    | 6/82   | $5.61 \times 10^{-5}$ | $6.99 \times 10^{-4}$ |
| LJP006 HS578T 24H-mitoxantrone-1.11   | 6/84   | $6.43 \times 10^{-5}$ | $7.85 \times 10^{-4}$ |
| LJP005 HCC515 24H-mitoxantrone-0.37   | 6/85   | $6.87 \times 10^{-5}$ | $8.30 \times 10^{-4}$ |
| LJP006 A549 24H-mitoxantrone-3.33     | 8/167  | $6.93 \times 10^{-5}$ | $8.34 \times 10^{-4}$ |
| LJP007 HA1E 24H-mitoxantrone-10       | 6/87   | $7.83 \times 10^{-5}$ | $9.17 \times 10^{-4}$ |
| LJP005 HA1E 24H-mitoxantrone-0.04     | 5/55   | $8.46 \times 10^{-5}$ | $9.85 \times 10^{-4}$ |
| LJP005 HS578T 3H-mitoxantrone-10      | 5/55   | $8.46 \times 10^{-5}$ | $9.84 \times 10^{-4}$ |
| LJP006 LNCAP 3H-mitoxantrone-10       | 5/57   | $1.01 \times 10^{-4}$ | $1.13 \times 10^{-3}$ |
| LJP005 A375 24H-mitoxantrone-3.33     | 6/92   | $1.07 \times 10^{-4}$ | $1.19 \times 10^{-3}$ |
| LJP006 MDAMB231 24H-mitoxantrone-10   | 4/31   | $1.13 \times 10^{-4}$ | $1.24 \times 10^{-3}$ |
| LJP005 MCF7 3H-mitoxantrone-10        | 6/93   | $1.13 \times 10^{-4}$ | $1.25 \times 10^{-3}$ |
| LJP006 MDAMB231 24H-mitoxantrone-0.37 | 5/59   | $1.19 \times 10^{-4}$ | $1.30 \times 10^{-3}$ |
| LJP005 PC3 24H-mitoxantrone-1.11      | 6/94   | $1.20 \times 10^{-4}$ | $1.32 \times 10^{-3}$ |
| LJP006 A549 24H-mitoxantrone-10       | 6/94   | $1.20 \times 10^{-4}$ | $1.31 \times 10^{-3}$ |
| LJP005 HS578T 24H-mitoxantrone-3.33   | 6/96   | $1.35 \times 10^{-4}$ | $1.46 \times 10^{-3}$ |
| LJP005 BT20 3H-mitoxantrone-10        | 5/61   | $1.39 \times 10^{-4}$ | $1.49 \times 10^{-3}$ |
| LJP006 HME1 24H-mitoxantrone-10       | 5/61   | $1.39 \times 10^{-4}$ | $1.49 \times 10^{-3}$ |
| LJP006 HA1E 24H-mitoxantrone-3.33     | 6/97   | $1.43 \times 10^{-4}$ | $1.53 \times 10^{-3}$ |
| LJP006 HME1 24H-mitoxantrone-3.33     | 5/63   | $1.62 \times 10^{-4}$ | $1.70 \times 10^{-3}$ |

S21 Table: (Continued)

|                                                  |       |                       |                       |
|--------------------------------------------------|-------|-----------------------|-----------------------|
| LJP006 MCF10A 3H-mitoxantrone-1.11               | 5/63  | $1.62 \times 10^{-4}$ | $1.70 \times 10^{-3}$ |
| LJP007 HEPG2 24H-mitoxantrone-10                 | 5/64  | $1.75 \times 10^{-4}$ | $1.80 \times 10^{-3}$ |
| LJP006 LNCAP 24H-mitoxantrone-3.33               | 6/101 | $1.79 \times 10^{-4}$ | $1.84 \times 10^{-3}$ |
| LJP006 LNCAP 24H-mitoxantrone-0.37               | 8/195 | $2.03 \times 10^{-4}$ | $2.04 \times 10^{-3}$ |
| LJP005 MDAMB231 3H-mitoxantrone-0.04             | 4/37  | $2.28 \times 10^{-4}$ | $2.27 \times 10^{-3}$ |
| LJP006 HT29 24H-mitoxantrone-3.33                | 7/150 | $2.33 \times 10^{-4}$ | $2.31 \times 10^{-3}$ |
| LJP005 MCF10A 3H-mitoxantrone-3.33               | 4/38  | $2.53 \times 10^{-4}$ | $2.48 \times 10^{-3}$ |
| LJP006 HEPG2 24H-mitoxantrone-1.11               | 6/108 | $2.58 \times 10^{-4}$ | $2.51 \times 10^{-3}$ |
| LJP006 HS578T 3H-mitoxantrone-10                 | 5/71  | $2.85 \times 10^{-4}$ | $2.73 \times 10^{-3}$ |
| LJP005 MDAMB231 24H-mitoxantrone-10              | 3/17  | $3.32 \times 10^{-4}$ | $3.11 \times 10^{-3}$ |
| LJP005 PC3 24H-mitoxantrone-0.12                 | 4/41  | $3.40 \times 10^{-4}$ | $3.17 \times 10^{-3}$ |
| LJP005 PC3 24H-mitoxantrone-3.33                 | 6/116 | $3.79 \times 10^{-4}$ | $3.45 \times 10^{-3}$ |
| LJP007 MCF7 24H-mitoxantrone-10                  | 6/120 | $4.54 \times 10^{-4}$ | $4.02 \times 10^{-3}$ |
| LJP006 MCF7 24H-mitoxantrone-1.11                | 6/121 | $4.75 \times 10^{-4}$ | $4.18 \times 10^{-3}$ |
| LJP006 HME1 3H-mitoxantrone-3.33                 | 5/81  | $5.26 \times 10^{-4}$ | $4.57 \times 10^{-3}$ |
| LJP005 HA1E 24H-mitoxantrone-1.11                | 5/82  | $5.56 \times 10^{-4}$ | $4.78 \times 10^{-3}$ |
| LJP005 HT29 24H-mitoxantrone-3.33                | 7/177 | $6.32 \times 10^{-4}$ | $5.30 \times 10^{-3}$ |
| LJP006 A549 24H-mitoxantrone-1.11                | 6/130 | $6.93 \times 10^{-4}$ | $5.73 \times 10^{-3}$ |
| LJP006 MCF7 3H-mitoxantrone-3.33                 | 4/50  | $7.31 \times 10^{-4}$ | $5.98 \times 10^{-3}$ |
| LJP008 HT29 24H-mitoxantrone-10                  | 4/55  | $1.05 \times 10^{-3}$ | $8.16 \times 10^{-3}$ |
| LJP006 HS578T 24H-mitoxantrone-0.12              | 4/56  | $1.12 \times 10^{-3}$ | $8.61 \times 10^{-3}$ |
| LJP005 MDAMB231 24H-mitoxantrone-3.33            | 3/28  | $1.50 \times 10^{-3}$ | $1.10 \times 10^{-2}$ |
| LJP006 SKBR3 3H-mitoxantrone-3.33                | 4/61  | $1.55 \times 10^{-3}$ | $1.12 \times 10^{-2}$ |
| LJP008 A375 24H-mitoxantrone-10                  | 5/103 | $1.56 \times 10^{-3}$ | $1.13 \times 10^{-2}$ |
| LJP005 MCF10A 24H-mitoxantrone-0.04              | 4/62  | $1.64 \times 10^{-3}$ | $1.18 \times 10^{-2}$ |
| LJP005 BT20 24H-mitoxantrone-3.33                | 4/64  | $1.85 \times 10^{-3}$ | $1.30 \times 10^{-2}$ |
| LJP006 HME1 3H-mitoxantrone-10                   | 4/64  | $1.85 \times 10^{-3}$ | $1.30 \times 10^{-2}$ |
| LJP006 PC3 24H-mitoxantrone-0.37                 | 4/64  | $1.85 \times 10^{-3}$ | $1.30 \times 10^{-2}$ |
| LJP006 MDAMB231 24H-mitoxantrone-0.12            | 3/31  | $2.02 \times 10^{-3}$ | $1.40 \times 10^{-2}$ |
| LJP005 MCF7 3H-mitoxantrone-1.11                 | 4/66  | $2.07 \times 10^{-3}$ | $1.43 \times 10^{-2}$ |
| LJP006 HA1E 24H-mitoxantrone-0.37                | 5/111 | $2.16 \times 10^{-3}$ | $1.49 \times 10^{-2}$ |
| LJP006 BT20 24H-mitoxantrone-0.37                | 4/69  | $2.44 \times 10^{-3}$ | $1.63 \times 10^{-2}$ |
| LJP005 SKBR3 24H-mitoxantrone-0.37               | 4/72  | $2.84 \times 10^{-3}$ | $1.86 \times 10^{-2}$ |
| LJP005 HS578T 3H-mitoxantrone-0.37               | 3/36  | $3.11 \times 10^{-3}$ | $2.01 \times 10^{-2}$ |
| LJP006 HEPG2 24H-mitoxantrone-0.37               | 5/125 | $3.62 \times 10^{-3}$ | $2.27 \times 10^{-2}$ |
| LJP006 A549 24H-mitoxantrone-0.12                | 5/129 | $4.14 \times 10^{-3}$ | $2.52 \times 10^{-2}$ |
| LJP006 MCF7 24H-mitoxantrone-3.33                | 4/81  | $4.35 \times 10^{-3}$ | $2.61 \times 10^{-2}$ |
| CPC020 HT29 6H-mitoxantrone dihydrochloride-10.0 | 6/190 | $4.71 \times 10^{-3}$ | $2.80 \times 10^{-2}$ |
| LJP005 A375 24H-mitoxantrone-1.11                | 4/83  | $4.74 \times 10^{-3}$ | $2.81 \times 10^{-2}$ |
| LJP006 HME1 3H-mitoxantrone-1.11                 | 3/43  | $5.16 \times 10^{-3}$ | $2.99 \times 10^{-2}$ |
| LJP006 HT29 24H-mitoxantrone-0.37                | 3/43  | $5.16 \times 10^{-3}$ | $2.99 \times 10^{-2}$ |
| LJP006 BT20 24H-mitoxantrone-3.33                | 4/86  | $5.38 \times 10^{-3}$ | $3.10 \times 10^{-2}$ |
| LJP006 LNCAP 3H-mitoxantrone-1.11                | 3/46  | $6.24 \times 10^{-3}$ | $3.47 \times 10^{-2}$ |
| LJP006 HCC515 24H-mitoxantrone-1.11              | 4/91  | $6.56 \times 10^{-3}$ | $3.62 \times 10^{-2}$ |
| LJP006 MDAMB231 3H-mitoxantrone-0.37             | 3/47  | $6.63 \times 10^{-3}$ | $3.64 \times 10^{-2}$ |
| LJP006 SKBR3 3H-mitoxantrone-1.11                | 3/47  | $6.63 \times 10^{-3}$ | $3.64 \times 10^{-2}$ |
| CPC020 PC3 6H-mitoxantrone dihydrochloride-10.0  | 6/205 | $6.77 \times 10^{-3}$ | $3.71 \times 10^{-2}$ |
| LJP005 BT20 24H-mitoxantrone-1.11                | 3/48  | $7.03 \times 10^{-3}$ | $3.84 \times 10^{-2}$ |
| LJP009 A549 24H-mitoxantrone-10                  | 3/48  | $7.03 \times 10^{-3}$ | $3.83 \times 10^{-2}$ |
| LJP005 SKBR3 3H-mitoxantrone-3.33                | 3/48  | $7.03 \times 10^{-3}$ | $3.83 \times 10^{-2}$ |
| LJP006 SKBR3 24H-mitoxantrone-1.11               | 4/94  | $7.35 \times 10^{-3}$ | $3.97 \times 10^{-2}$ |
| LJP005 SKBR3 24H-mitoxantrone-0.04               | 3/49  | $7.44 \times 10^{-3}$ | $4.00 \times 10^{-2}$ |
| LJP005 MCF10A 24H-mitoxantrone-1.11              | 5/149 | $7.55 \times 10^{-3}$ | $4.04 \times 10^{-2}$ |
| LJP007 PC3 24H-mitoxantrone-10                   | 4/97  | $8.19 \times 10^{-3}$ | $4.33 \times 10^{-2}$ |
