# Supplementary material for: A new advanced in silico drug discovery method for novel coronavirus (SARS-CoV-2) with tensor decomposition-based unsupervised feature extraction
Source: PubMed Central journal article supplement (PMC7485840; doi:10.1371/journal.pone.0238907), 2020-09-11
Supplement: pone.0238907.s022.pdf [file pone.0238907.s022.pdf]

S22 Table: QL-XII-47 significantly affects the expression of the selected 163 genes as evident in the “LINCS L1000 Chem Pert up” category in Enrichr. The last number after the - is dose density.

| Term                               | Overlap | P-value                | Adjusted P-value       |
|------------------------------------|---------|------------------------|------------------------|
| LINCS L1000 Chem Pert up           |         |                        |                        |
| LJP006 MCF7 24H-QL-XII-47-3.33     | 18/163  | $1.37 \times 10^{-15}$ | $1.13 \times 10^{-12}$ |
| LJP006 A549 24H-QL-XII-47-10       | 19/219  | $1.89 \times 10^{-14}$ | $9.96 \times 10^{-12}$ |
| LJP006 HME1 24H-QL-XII-47-1.11     | 15/153  | $2.04 \times 10^{-12}$ | $5.07 \times 10^{-10}$ |
| LJP006 MCF7 24H-QL-XII-47-1.11     | 14/131  | $3.49 \times 10^{-12}$ | $7.65 \times 10^{-10}$ |
| LJP006 LNCAP 24H-QL-XII-47-0.37    | 13/122  | $2.20 \times 10^{-11}$ | $3.32 \times 10^{-9}$  |
| LJP006 SKBR3 24H-QL-XII-47-0.37    | 12/99   | $2.86 \times 10^{-11}$ | $4.12 \times 10^{-9}$  |
| LJP006 MCF10A 3H-QL-XII-47-10      | 12/103  | $4.60 \times 10^{-11}$ | $6.10 \times 10^{-9}$  |
| LJP006 HME1 24H-QL-XII-47-0.37     | 12/106  | $6.49 \times 10^{-11}$ | $7.87 \times 10^{-9}$  |
| LJP006 HCC515 24H-QL-XII-47-10     | 13/143  | $1.66 \times 10^{-10}$ | $1.68 \times 10^{-8}$  |
| LJP006 A375 24H-QL-XII-47-0.12     | 8/38    | $6.51 \times 10^{-10}$ | $5.27 \times 10^{-8}$  |
| LJP006 BT20 24H-QL-XII-47-0.04     | 9/56    | $6.93 \times 10^{-10}$ | $5.58 \times 10^{-8}$  |
| LJP006 HT29 24H-QL-XII-47-10       | 11/107  | $1.18 \times 10^{-9}$  | $8.48 \times 10^{-8}$  |
| LJP006 MCF7 24H-QL-XII-47-10       | 14/204  | $1.34 \times 10^{-9}$  | $9.34 \times 10^{-8}$  |
| LJP006 MDAMB231 3H-QL-XII-47-10    | 11/130  | $9.46 \times 10^{-9}$  | $4.91 \times 10^{-7}$  |
| LJP006 MCF7 24H-QL-XII-47-0.37     | 10/103  | $1.21 \times 10^{-8}$  | $6.00 \times 10^{-7}$  |
| LJP006 HEPG2 24H-QL-XII-47-1.11    | 11/134  | $1.30 \times 10^{-8}$  | $6.37 \times 10^{-7}$  |
| LJP006 HME1 3H-QL-XII-47-3.33      | 11/135  | $1.41 \times 10^{-8}$  | $6.81 \times 10^{-7}$  |
| LJP006 BT20 24H-QL-XII-47-0.12     | 12/172  | $1.76 \times 10^{-8}$  | $8.21 \times 10^{-7}$  |
| LJP006 A549 24H-QL-XII-47-3.33     | 7/49    | $1.35 \times 10^{-7}$  | $4.65 \times 10^{-6}$  |
| LJP006 HME1 3H-QL-XII-47-1.11      | 10/135  | $1.61 \times 10^{-7}$  | $5.37 \times 10^{-6}$  |
| LJP006 A375 24H-QL-XII-47-3.33     | 11/172  | $1.71 \times 10^{-7}$  | $5.64 \times 10^{-6}$  |
| LJP006 MCF7 3H-QL-XII-47-10        | 9/111   | $3.16 \times 10^{-7}$  | $9.38 \times 10^{-6}$  |
| LJP006 LNCAP 24H-QL-XII-47-1.11    | 12/227  | $3.67 \times 10^{-7}$  | $1.07 \times 10^{-5}$  |
| LJP006 HME1 3H-QL-XII-47-0.37      | 9/113   | $3.68 \times 10^{-7}$  | $1.07 \times 10^{-5}$  |
| LJP006 HEPG2 24H-QL-XII-47-0.12    | 6/37    | $5.04 \times 10^{-7}$  | $1.39 \times 10^{-5}$  |
| LJP006 MCF7 3H-QL-XII-47-3.33      | 8/86    | $5.07 \times 10^{-7}$  | $1.39 \times 10^{-5}$  |
| LJP006 HEPG2 24H-QL-XII-47-3.33    | 9/120   | $6.14 \times 10^{-7}$  | $1.65 \times 10^{-5}$  |
| LJP006 MCF10A 24H-QL-XII-47-3.33   | 9/121   | $6.59 \times 10^{-7}$  | $1.75 \times 10^{-5}$  |
| LJP006 MCF7 3H-QL-XII-47-1.11      | 7/62    | $7.08 \times 10^{-7}$  | $1.86 \times 10^{-5}$  |
| LJP006 MDAMB231 3H-QL-XII-47-0.37  | 7/64    | $8.83 \times 10^{-7}$  | $2.23 \times 10^{-5}$  |
| LJP006 MDAMB231 3H-QL-XII-47-1.11  | 8/99    | $1.50 \times 10^{-6}$  | $3.44 \times 10^{-5}$  |
| LJP006 BT20 3H-QL-XII-47-1.11      | 7/71    | $1.80 \times 10^{-6}$  | $4.02 \times 10^{-5}$  |
| LJP006 HT29 24H-QL-XII-47-0.12     | 5/27    | $2.36 \times 10^{-6}$  | $5.04 \times 10^{-5}$  |
| LJP006 SKBR3 24H-QL-XII-47-10      | 10/191  | $3.88 \times 10^{-6}$  | $7.56 \times 10^{-5}$  |
| LJP006 BT20 3H-QL-XII-47-0.12      | 4/16    | $7.17 \times 10^{-6}$  | $1.27 \times 10^{-4}$  |
| LJP006 BT20 3H-QL-XII-47-3.33      | 6/59    | $8.42 \times 10^{-6}$  | $1.44 \times 10^{-4}$  |
| LJP006 MDAMB231 3H-QL-XII-47-3.33  | 8/127   | $9.66 \times 10^{-6}$  | $1.61 \times 10^{-4}$  |
| LJP006 BT20 3H-QL-XII-47-0.37      | 6/64    | $1.36 \times 10^{-5}$  | $2.14 \times 10^{-4}$  |
| LJP006 SKBR3 3H-QL-XII-47-10       | 6/66    | $1.62 \times 10^{-5}$  | $2.47 \times 10^{-4}$  |
| LJP006 HME1 24H-QL-XII-47-3.33     | 8/146   | $2.66 \times 10^{-5}$  | $3.79 \times 10^{-4}$  |
| LJP006 MCF10A 3H-QL-XII-47-3.33    | 6/76    | $3.65 \times 10^{-5}$  | $4.95 \times 10^{-4}$  |
| LJP006 BT20 3H-QL-XII-47-0.04      | 4/24    | $3.98 \times 10^{-5}$  | $5.33 \times 10^{-4}$  |
| LJP006 LNCAP 24H-QL-XII-47-3.33    | 9/203   | $4.45 \times 10^{-5}$  | $5.87 \times 10^{-4}$  |
| LJP006 SKBR3 24H-QL-XII-47-3.33    | 9/203   | $4.45 \times 10^{-5}$  | $5.87 \times 10^{-4}$  |
| LJP006 MCF10A 24H-QL-XII-47-10     | 8/158   | $4.68 \times 10^{-5}$  | $6.12 \times 10^{-4}$  |
| LJP006 SKBR3 24H-QL-XII-47-1.11    | 8/163   | $5.84 \times 10^{-5}$  | $7.38 \times 10^{-4}$  |
| LJP006 HME1 3H-QL-XII-47-0.12      | 5/52    | $6.45 \times 10^{-5}$  | $7.91 \times 10^{-4}$  |
| LJP006 MDAMB231 24H-QL-XII-47-1.11 | 4/28    | $7.47 \times 10^{-5}$  | $8.99 \times 10^{-4}$  |
| LJP006 SKBR3 3H-QL-XII-47-3.33     | 6/92    | $1.07 \times 10^{-4}$  | $1.21 \times 10^{-3}$  |
| LJP006 BT20 24H-QL-XII-47-0.37     | 8/180   | $1.17 \times 10^{-4}$  | $1.30 \times 10^{-3}$  |
| LJP006 HEPG2 24H-QL-XII-47-10      | 6/95    | $1.28 \times 10^{-4}$  | $1.41 \times 10^{-3}$  |
| LJP006 SKBR3 3H-QL-XII-47-1.11     | 6/95    | $1.28 \times 10^{-4}$  | $1.41 \times 10^{-3}$  |
| LJP006 HS578T 24H-QL-XII-47-10     | 9/233   | $1.28 \times 10^{-4}$  | $1.40 \times 10^{-3}$  |
| LJP006 MCF7 3H-QL-XII-47-0.04      | 4/33    | $1.45 \times 10^{-4}$  | $1.56 \times 10^{-3}$  |

S22 Table: (Continued)

|                                    |       |                       |                       |
|------------------------------------|-------|-----------------------|-----------------------|
| LJP006 A375 24H-QL-XII-47-1.11     | 6/103 | $1.99 \times 10^{-4}$ | $2.03 \times 10^{-3}$ |
| LJP006 MCF7 24H-QL-XII-47-0.12     | 4/36  | $2.04 \times 10^{-4}$ | $2.07 \times 10^{-3}$ |
| LJP006 MCF7 3H-QL-XII-47-0.37      | 4/37  | $2.28 \times 10^{-4}$ | $2.27 \times 10^{-3}$ |
| LJP006 LNCAP 24H-QL-XII-47-0.12    | 5/83  | $5.88 \times 10^{-4}$ | $5.02 \times 10^{-3}$ |
| LJP006 HS578T 3H-QL-XII-47-1.11    | 4/48  | $6.26 \times 10^{-4}$ | $5.30 \times 10^{-3}$ |
| LJP006 A375 24H-QL-XII-47-10       | 6/131 | $7.22 \times 10^{-4}$ | $6.01 \times 10^{-3}$ |
| LJP006 LNCAP 3H-QL-XII-47-1.11     | 4/51  | $7.89 \times 10^{-4}$ | $6.42 \times 10^{-3}$ |
| LJP006 MDAMB231 24H-QL-XII-47-3.33 | 4/51  | $7.89 \times 10^{-4}$ | $6.41 \times 10^{-3}$ |
| LJP006 BT20 24H-QL-XII-47-10       | 7/199 | $1.25 \times 10^{-3}$ | $9.39 \times 10^{-3}$ |
| LJP006 HS578T 3H-QL-XII-47-3.33    | 4/59  | $1.37 \times 10^{-3}$ | $1.00 \times 10^{-2}$ |
| LJP006 LNCAP 24H-QL-XII-47-10      | 7/212 | $1.80 \times 10^{-3}$ | $1.26 \times 10^{-2}$ |
| LJP006 LNCAP 3H-QL-XII-47-3.33     | 4/66  | $2.07 \times 10^{-3}$ | $1.41 \times 10^{-2}$ |
| LJP006 A549 24H-QL-XII-47-0.37     | 3/35  | $2.87 \times 10^{-3}$ | $1.85 \times 10^{-2}$ |
| LJP006 LNCAP 3H-QL-XII-47-10       | 4/78  | $3.80 \times 10^{-3}$ | $2.32 \times 10^{-2}$ |
| LJP006 BT20 24H-QL-XII-47-1.11     | 6/195 | $5.34 \times 10^{-3}$ | $3.02 \times 10^{-2}$ |
| LJP006 HME1 24H-QL-XII-47-0.12     | 3/45  | $5.87 \times 10^{-3}$ | $3.24 \times 10^{-2}$ |
| LJP006 MDAMB231 24H-QL-XII-47-10   | 4/95  | $7.62 \times 10^{-3}$ | $3.99 \times 10^{-2}$ |
| LJP006 SKBR3 24H-QL-XII-47-0.12    | 3/53  | $9.24 \times 10^{-3}$ | $4.62 \times 10^{-2}$ |
