# Supplementary material for: A new advanced in silico drug discovery method for novel coronavirus (SARS-CoV-2) with tensor decomposition-based unsupervised feature extraction
Source: PubMed Central journal article supplement (PMC7485840; doi:10.1371/journal.pone.0238907), 2020-09-11
Supplement: pone.0238907.s023.pdf [file pone.0238907.s023.pdf]

S23 Table: QL-XII-47 significantly affects the expression of the selected 163 genes as evident in the “LINCS L1000 Chem Pert down” category in Enrichr. The last number after the - is dose density.

| Term                               | Overlap | P-value                | Adjusted P-value       |
|------------------------------------|---------|------------------------|------------------------|
| LINCS L1000 Chem Pert down         |         |                        |                        |
| LJP006 BT20 24H-QL-XII-47-10       | 19/169  | $1.52 \times 10^{-16}$ | $2.29 \times 10^{-13}$ |
| LJP006 SKBR3 24H-QL-XII-47-3.33    | 19/180  | $4.98 \times 10^{-16}$ | $5.69 \times 10^{-13}$ |
| LJP006 HA1E 24H-QL-XII-47-1.11     | 16/178  | $1.40 \times 10^{-12}$ | $3.48 \times 10^{-10}$ |
| LJP006 HS578T 24H-QL-XII-47-10     | 15/184  | $2.95 \times 10^{-11}$ | $3.91 \times 10^{-9}$  |
| LJP006 HA1E 24H-QL-XII-47-0.37     | 12/106  | $6.49 \times 10^{-11}$ | $7.46 \times 10^{-9}$  |
| LJP006 HA1E 24H-QL-XII-47-3.33     | 15/195  | $6.76 \times 10^{-11}$ | $7.72 \times 10^{-9}$  |
| LJP006 LNCAP 24H-QL-XII-47-10      | 13/151  | $3.28 \times 10^{-10}$ | $2.80 \times 10^{-8}$  |
| LJP006 SKBR3 24H-QL-XII-47-1.11    | 14/185  | $3.72 \times 10^{-10}$ | $3.10 \times 10^{-8}$  |
| LJP006 LNCAP 24H-QL-XII-47-3.33    | 13/168  | $1.23 \times 10^{-9}$  | $8.37 \times 10^{-8}$  |
| LJP006 HS578T 24H-QL-XII-47-3.33   | 13/175  | $2.03 \times 10^{-9}$  | $1.27 \times 10^{-7}$  |
| LJP006 BT20 24H-QL-XII-47-0.37     | 12/164  | $1.03 \times 10^{-8}$  | $4.95 \times 10^{-7}$  |
| LJP006 HME1 3H-QL-XII-47-10        | 9/90    | $5.11 \times 10^{-8}$  | $1.91 \times 10^{-6}$  |
| LJP006 BT20 24H-QL-XII-47-3.33     | 11/165  | $1.12 \times 10^{-7}$  | $3.71 \times 10^{-6}$  |
| LJP006 HME1 24H-QL-XII-47-0.12     | 7/52    | $2.06 \times 10^{-7}$  | $6.21 \times 10^{-6}$  |
| LJP006 A549 24H-QL-XII-47-10       | 10/146  | $3.35 \times 10^{-7}$  | $9.26 \times 10^{-6}$  |
| LJP006 MCF7 24H-QL-XII-47-3.33     | 9/116   | $4.60 \times 10^{-7}$  | $1.20 \times 10^{-5}$  |
| LJP006 LNCAP 3H-QL-XII-47-0.37     | 6/43    | $1.27 \times 10^{-6}$  | $2.83 \times 10^{-5}$  |
| LJP006 HA1E 24H-QL-XII-47-10       | 8/98    | $1.38 \times 10^{-6}$  | $3.03 \times 10^{-5}$  |
| LJP006 BT20 24H-QL-XII-47-1.11     | 9/135   | $1.65 \times 10^{-6}$  | $3.53 \times 10^{-5}$  |
| LJP006 HEPG2 24H-QL-XII-47-3.33    | 10/176  | $1.86 \times 10^{-6}$  | $3.89 \times 10^{-5}$  |
| LJP006 MCF10A 24H-QL-XII-47-10     | 8/107   | $2.69 \times 10^{-6}$  | $5.29 \times 10^{-5}$  |
| LJP006 HS578T 24H-QL-XII-47-1.11   | 6/49    | $2.80 \times 10^{-6}$  | $5.47 \times 10^{-5}$  |
| LJP006 HME1 24H-QL-XII-47-1.11     | 9/152   | $4.41 \times 10^{-6}$  | $8.07 \times 10^{-5}$  |
| LJP006 LNCAP 3H-QL-XII-47-1.11     | 5/32    | $5.70 \times 10^{-6}$  | $1.00 \times 10^{-4}$  |
| LJP006 HCC515 24H-QL-XII-47-10     | 8/123   | $7.63 \times 10^{-6}$  | $1.28 \times 10^{-4}$  |
| LJP006 MDAMB231 24H-QL-XII-47-3.33 | 6/60    | $9.30 \times 10^{-6}$  | $1.52 \times 10^{-4}$  |
| LJP006 LNCAP 24H-QL-XII-47-1.11    | 9/170   | $1.09 \times 10^{-5}$  | $1.75 \times 10^{-4}$  |
| LJP006 HEPG2 24H-QL-XII-47-1.11    | 10/219  | $1.29 \times 10^{-5}$  | $2.02 \times 10^{-4}$  |
| LJP006 MCF7 24H-QL-XII-47-0.12     | 5/38    | $1.37 \times 10^{-5}$  | $2.11 \times 10^{-4}$  |
| LJP006 LNCAP 3H-QL-XII-47-10       | 5/41    | $2.00 \times 10^{-5}$  | $2.92 \times 10^{-4}$  |
| LJP006 HME1 24H-QL-XII-47-10       | 7/113   | $3.93 \times 10^{-5}$  | $5.18 \times 10^{-4}$  |
| LJP006 HME1 24H-QL-XII-47-0.37     | 8/157   | $4.48 \times 10^{-5}$  | $5.77 \times 10^{-4}$  |
| LJP006 LNCAP 3H-QL-XII-47-3.33     | 4/27    | $6.45 \times 10^{-5}$  | $7.86 \times 10^{-4}$  |
| LJP006 SKBR3 24H-QL-XII-47-10      | 8/167   | $6.93 \times 10^{-5}$  | $8.34 \times 10^{-4}$  |
| LJP006 HME1 24H-QL-XII-47-3.33     | 7/125   | $7.48 \times 10^{-5}$  | $8.86 \times 10^{-4}$  |
| LJP006 HEPG2 24H-QL-XII-47-0.12    | 6/90    | $9.46 \times 10^{-5}$  | $1.07 \times 10^{-3}$  |
| LJP006 HME1 3H-QL-XII-47-0.37      | 5/58    | $1.09 \times 10^{-4}$  | $1.21 \times 10^{-3}$  |
| LJP006 MCF7 24H-QL-XII-47-0.37     | 5/58    | $1.09 \times 10^{-4}$  | $1.21 \times 10^{-3}$  |
| LJP006 MCF7 24H-QL-XII-47-1.11     | 6/94    | $1.20 \times 10^{-4}$  | $1.31 \times 10^{-3}$  |
| LJP006 LNCAP 3H-QL-XII-47-0.12     | 4/32    | $1.28 \times 10^{-4}$  | $1.39 \times 10^{-3}$  |
| LJP006 BT20 3H-QL-XII-47-0.37      | 4/33    | $1.45 \times 10^{-4}$  | $1.53 \times 10^{-3}$  |
| LJP006 HS578T 3H-QL-XII-47-1.11    | 4/41    | $3.40 \times 10^{-4}$  | $3.17 \times 10^{-3}$  |
| LJP006 LNCAP 24H-QL-XII-47-0.37    | 6/115   | $3.62 \times 10^{-4}$  | $3.33 \times 10^{-3}$  |
| LJP006 SKBR3 24H-QL-XII-47-0.12    | 4/60    | $1.45 \times 10^{-3}$  | $1.07 \times 10^{-2}$  |
| LJP006 HS578T 3H-QL-XII-47-3.33    | 3/30    | $1.84 \times 10^{-3}$  | $1.30 \times 10^{-2}$  |
| LJP006 MDAMB231 24H-QL-XII-47-10   | 4/65    | $1.96 \times 10^{-3}$  | $1.37 \times 10^{-2}$  |
| LJP006 SKBR3 3H-QL-XII-47-1.11     | 4/72    | $2.84 \times 10^{-3}$  | $1.86 \times 10^{-2}$  |
| LJP006 MCF7 24H-QL-XII-47-10       | 5/124   | $3.49 \times 10^{-3}$  | $2.19 \times 10^{-2}$  |
| LJP006 BT20 24H-QL-XII-47-0.12     | 5/141   | $6.01 \times 10^{-3}$  | $3.38 \times 10^{-2}$  |
| LJP006 BT20 3H-QL-XII-47-0.04      | 2/15    | $6.47 \times 10^{-3}$  | $3.57 \times 10^{-2}$  |
| LJP006 A549 24H-QL-XII-47-0.37     | 4/98    | $8.49 \times 10^{-3}$  | $4.43 \times 10^{-2}$  |
| LJP006 MCF10A 24H-QL-XII-47-1.11   | 3/53    | $9.24 \times 10^{-3}$  | $4.75 \times 10^{-2}$  |
| LJP006 SKBR3 24H-QL-XII-47-0.37    | 4/101   | $9.42 \times 10^{-3}$  | $4.81 \times 10^{-2}$  |
