# Supplementary material for: A new advanced in silico drug discovery method for novel coronavirus (SARS-CoV-2) with tensor decomposition-based unsupervised feature extraction
Source: PubMed Central journal article supplement (PMC7485840; doi:10.1371/journal.pone.0238907), 2020-09-11
Supplement: pone.0238907.s025.pdf [file pone.0238907.s025.pdf]

S25 Table: Geldanamycin significantly affects the expression of the selected 163 genes as evident in the “LINCS L1000 Chem Pert down” category in Enrichr. The last number after the - is dose density.

| Term                                  | Overlap | P-value                | Adjusted P-value       |
|---------------------------------------|---------|------------------------|------------------------|
| LINCS L1000 Chem Pert down            |         |                        |                        |
| LJP005 HA1E 24H-geldanamycin-3.33     | 18/148  | $2.41 \times 10^{-16}$ | $3.06 \times 10^{-13}$ |
| LJP005 HS578T 24H-geldanamycin-10     | 16/131  | $1.11 \times 10^{-14}$ | $6.92 \times 10^{-12}$ |
| LJP006 SKBR3 24H-geldanamycin-0.37    | 14/91   | $2.01 \times 10^{-14}$ | $1.07 \times 10^{-11}$ |
| LJP006 HA1E 24H-geldanamycin-3.33     | 16/138  | $2.55 \times 10^{-14}$ | $1.26 \times 10^{-11}$ |
| LJP005 HS578T 24H-geldanamycin-3.33   | 15/118  | $4.24 \times 10^{-14}$ | $1.98 \times 10^{-11}$ |
| LJP006 HA1E 24H-geldanamycin-0.37     | 15/121  | $6.20 \times 10^{-14}$ | $2.53 \times 10^{-11}$ |
| LJP006 HA1E 24H-geldanamycin-1.11     | 16/157  | $1.97 \times 10^{-13}$ | $6.87 \times 10^{-11}$ |
| LJP006 MDAMB231 24H-geldanamycin-1.11 | 14/123  | $1.45 \times 10^{-12}$ | $3.54 \times 10^{-10}$ |
| LJP006 SKBR3 24H-geldanamycin-0.12    | 12/78   | $1.56 \times 10^{-12}$ | $3.71 \times 10^{-10}$ |
| LJP005 A375 24H-geldanamycin-3.33     | 16/183  | $2.14 \times 10^{-12}$ | $4.73 \times 10^{-10}$ |
| LJP005 HA1E 24H-geldanamycin-10       | 14/137  | $6.46 \times 10^{-12}$ | $1.14 \times 10^{-9}$  |
| LJP006 A375 24H-geldanamycin-0.37     | 15/166  | $6.69 \times 10^{-12}$ | $1.16 \times 10^{-9}$  |
| LJP005 HA1E 24H-geldanamycin-1.11     | 14/142  | $1.06 \times 10^{-11}$ | $1.68 \times 10^{-9}$  |
| LJP005 SKBR3 24H-geldanamycin-0.37    | 11/82   | $6.38 \times 10^{-11}$ | $7.41 \times 10^{-9}$  |
| LJP005 SKBR3 24H-geldanamycin-1.11    | 10/63   | $8.63 \times 10^{-11}$ | $9.22 \times 10^{-9}$  |
| LJP005 HS578T 24H-geldanamycin-1.11   | 12/109  | $9.04 \times 10^{-11}$ | $9.60 \times 10^{-9}$  |
| LJP005 BT20 24H-geldanamycin-0.12     | 10/64   | $1.02 \times 10^{-10}$ | $1.05 \times 10^{-8}$  |
| LJP005 HA1E 24H-geldanamycin-0.37     | 13/141  | $1.39 \times 10^{-10}$ | $1.37 \times 10^{-8}$  |
| LJP006 A375 24H-geldanamycin-1.11     | 14/182  | $3.00 \times 10^{-10}$ | $2.60 \times 10^{-8}$  |
| LJP006 MDAMB231 24H-geldanamycin-0.37 | 11/96   | $3.64 \times 10^{-10}$ | $3.05 \times 10^{-8}$  |
| LJP006 BT20 24H-geldanamycin-1.11     | 10/75   | $5.15 \times 10^{-10}$ | $4.04 \times 10^{-8}$  |
| LJP005 HEPG2 24H-geldanamycin-3.33    | 13/159  | $6.23 \times 10^{-10}$ | $4.77 \times 10^{-8}$  |
| LJP006 HS578T 24H-geldanamycin-10     | 12/132  | $8.57 \times 10^{-10}$ | $6.20 \times 10^{-8}$  |
| LJP005 MCF10A 3H-geldanamycin-0.04    | 9/61    | $1.53 \times 10^{-9}$  | $9.92 \times 10^{-8}$  |
| LJP006 SKBR3 24H-geldanamycin-0.04    | 10/89   | $2.86 \times 10^{-9}$  | $1.68 \times 10^{-7}$  |
| LJP006 HS578T 24H-geldanamycin-0.37   | 12/148  | $3.20 \times 10^{-9}$  | $1.85 \times 10^{-7}$  |
| LJP006 SKBR3 24H-geldanamycin-1.11    | 8/50    | $6.57 \times 10^{-9}$  | $3.39 \times 10^{-7}$  |
| LJP006 HEPG2 24H-geldanamycin-3.33    | 10/98   | $7.41 \times 10^{-9}$  | $3.75 \times 10^{-7}$  |
| LJP006 BT20 24H-geldanamycin-0.12     | 9/74    | $8.93 \times 10^{-9}$  | $4.44 \times 10^{-7}$  |
| LJP005 SKBR3 24H-geldanamycin-0.04    | 9/78    | $1.43 \times 10^{-8}$  | $6.49 \times 10^{-7}$  |
| LJP005 A375 24H-geldanamycin-0.04     | 9/81    | $2.01 \times 10^{-8}$  | $8.55 \times 10^{-7}$  |
| LJP006 HS578T 24H-geldanamycin-1.11   | 11/145  | $2.97 \times 10^{-8}$  | $1.18 \times 10^{-6}$  |
| LJP006 HA1E 24H-geldanamycin-10       | 9/86    | $3.42 \times 10^{-8}$  | $1.34 \times 10^{-6}$  |
| LJP006 SKBR3 24H-geldanamycin-3.33    | 9/86    | $3.42 \times 10^{-8}$  | $1.33 \times 10^{-6}$  |
| LJP006 HME1 24H-geldanamycin-0.04     | 10/121  | $5.70 \times 10^{-8}$  | $2.08 \times 10^{-6}$  |
| LJP006 HS578T 24H-geldanamycin-3.33   | 10/122  | $6.17 \times 10^{-8}$  | $2.24 \times 10^{-6}$  |
| LJP006 MCF10A 3H-geldanamycin-0.37    | 8/66    | $6.30 \times 10^{-8}$  | $2.25 \times 10^{-6}$  |
| LJP005 MDAMB231 24H-geldanamycin-3.33 | 7/46    | $8.60 \times 10^{-8}$  | $2.95 \times 10^{-6}$  |
| LJP006 A549 24H-geldanamycin-0.37     | 6/28    | $8.68 \times 10^{-8}$  | $2.96 \times 10^{-6}$  |
| LJP006 HS578T 24H-geldanamycin-0.12   | 9/97    | $9.84 \times 10^{-8}$  | $3.31 \times 10^{-6}$  |
| LJP006 HME1 24H-geldanamycin-3.33     | 11/164  | $1.05 \times 10^{-7}$  | $3.51 \times 10^{-6}$  |
| LJP006 A375 24H-geldanamycin-0.04     | 9/104   | $1.80 \times 10^{-7}$  | $5.55 \times 10^{-6}$  |
| LJP005 SKBR3 24H-geldanamycin-3.33    | 8/78    | $2.37 \times 10^{-7}$  | $6.98 \times 10^{-6}$  |
| LJP006 MCF10A 3H-geldanamycin-3.33    | 8/80    | $2.89 \times 10^{-7}$  | $8.17 \times 10^{-6}$  |
| LJP006 MDAMB231 24H-geldanamycin-3.33 | 8/84    | $4.22 \times 10^{-7}$  | $1.12 \times 10^{-5}$  |
| LJP005 MCF10A 3H-geldanamycin-0.37    | 8/85    | $4.63 \times 10^{-7}$  | $1.20 \times 10^{-5}$  |
| LJP005 MCF10A 3H-geldanamycin-0.12    | 8/86    | $5.07 \times 10^{-7}$  | $1.29 \times 10^{-5}$  |
| LJP006 HME1 24H-geldanamycin-10       | 10/153  | $5.17 \times 10^{-7}$  | $1.31 \times 10^{-5}$  |
| LJP006 HEPG2 24H-geldanamycin-1.11    | 8/88    | $6.06 \times 10^{-7}$  | $1.50 \times 10^{-5}$  |
| LJP005 HS578T 24H-geldanamycin-0.12   | 8/89    | $6.61 \times 10^{-7}$  | $1.62 \times 10^{-5}$  |
| LJP006 MDAMB231 24H-geldanamycin-0.12 | 8/89    | $6.61 \times 10^{-7}$  | $1.61 \times 10^{-5}$  |
| LJP006 MCF10A 3H-geldanamycin-0.04    | 7/62    | $7.08 \times 10^{-7}$  | $1.72 \times 10^{-5}$  |
| LJP006 BT20 24H-geldanamycin-3.33     | 8/94    | $1.01 \times 10^{-6}$  | $2.32 \times 10^{-5}$  |

S25 Table: (Continued)

|                                       |       |                       |                       |
|---------------------------------------|-------|-----------------------|-----------------------|
| LJP006 MDAMB231 24H-geldanamycin-10   | 8/94  | $1.01 \times 10^{-6}$ | $2.32 \times 10^{-5}$ |
| LJP005 BT20 24H-geldanamycin-0.37     | 8/96  | $1.18 \times 10^{-6}$ | $2.67 \times 10^{-5}$ |
| LJP006 PC3 24H-geldanamycin-10        | 8/96  | $1.18 \times 10^{-6}$ | $2.67 \times 10^{-5}$ |
| LJP005 BT20 24H-geldanamycin-1.11     | 7/67  | $1.21 \times 10^{-6}$ | $2.73 \times 10^{-5}$ |
| LJP006 MCF10A 3H-geldanamycin-0.12    | 7/67  | $1.21 \times 10^{-6}$ | $2.72 \times 10^{-5}$ |
| LJP005 HEPG2 24H-geldanamycin-1.11    | 9/131 | $1.29 \times 10^{-6}$ | $2.85 \times 10^{-5}$ |
| LJP006 A375 24H-geldanamycin-3.33     | 9/131 | $1.29 \times 10^{-6}$ | $2.85 \times 10^{-5}$ |
| LJP005 MCF10A 3H-geldanamycin-3.33    | 7/68  | $1.34 \times 10^{-6}$ | $2.96 \times 10^{-5}$ |
| LJP005 MCF7 3H-geldanamycin-10        | 6/45  | $1.67 \times 10^{-6}$ | $3.56 \times 10^{-5}$ |
| LJP006 HA1E 24H-geldanamycin-0.12     | 6/45  | $1.67 \times 10^{-6}$ | $3.56 \times 10^{-5}$ |
| LJP005 HCC515 24H-geldanamycin-3.33   | 9/140 | $2.24 \times 10^{-6}$ | $4.54 \times 10^{-5}$ |
| LJP006 HCC515 24H-geldanamycin-1.11   | 9/144 | $2.83 \times 10^{-6}$ | $5.51 \times 10^{-5}$ |
| LJP006 LNCAP 24H-geldanamycin-3.33    | 9/163 | $7.79 \times 10^{-6}$ | $1.30 \times 10^{-4}$ |
| LJP006 HME1 24H-geldanamycin-0.12     | 9/164 | $8.19 \times 10^{-6}$ | $1.37 \times 10^{-4}$ |
| LJP006 MCF10A 3H-geldanamycin-1.11    | 7/89  | $8.26 \times 10^{-6}$ | $1.37 \times 10^{-4}$ |
| LJP006 PC3 24H-geldanamycin-3.33      | 7/90  | $8.89 \times 10^{-6}$ | $1.46 \times 10^{-4}$ |
| LJP005 SKBR3 24H-geldanamycin-10      | 7/92  | $1.03 \times 10^{-5}$ | $1.66 \times 10^{-4}$ |
| LJP005 HS578T 3H-geldanamycin-0.37    | 5/36  | $1.04 \times 10^{-5}$ | $1.67 \times 10^{-4}$ |
| LJP006 MCF7 3H-geldanamycin-1.11      | 5/38  | $1.37 \times 10^{-5}$ | $2.10 \times 10^{-4}$ |
| LJP006 BT20 24H-geldanamycin-10       | 7/97  | $1.46 \times 10^{-5}$ | $2.24 \times 10^{-4}$ |
| LJP005 SKBR3 24H-geldanamycin-0.12    | 6/69  | $2.10 \times 10^{-5}$ | $3.05 \times 10^{-4}$ |
| LJP006 BT20 24H-geldanamycin-0.37     | 6/69  | $2.10 \times 10^{-5}$ | $3.04 \times 10^{-4}$ |
| LJP006 HME1 3H-geldanamycin-1.11      | 5/42  | $2.25 \times 10^{-5}$ | $3.24 \times 10^{-4}$ |
| LJP005 MCF10A 3H-geldanamycin-10      | 5/43  | $2.53 \times 10^{-5}$ | $3.59 \times 10^{-4}$ |
| LJP005 MCF10A 3H-geldanamycin-1.11    | 6/72  | $2.68 \times 10^{-5}$ | $3.77 \times 10^{-4}$ |
| LJP006 HCC515 24H-geldanamycin-3.33   | 7/110 | $3.31 \times 10^{-5}$ | $4.51 \times 10^{-4}$ |
| LJP006 LNCAP 24H-geldanamycin-1.11    | 7/110 | $3.31 \times 10^{-5}$ | $4.51 \times 10^{-4}$ |
| LJP006 A549 24H-geldanamycin-1.11     | 6/76  | $3.65 \times 10^{-5}$ | $4.88 \times 10^{-4}$ |
| LJP006 HME1 24H-geldanamycin-0.37     | 8/154 | $3.90 \times 10^{-5}$ | $5.18 \times 10^{-4}$ |
| LJP006 SKBR3 24H-geldanamycin-10      | 6/77  | $3.93 \times 10^{-5}$ | $5.19 \times 10^{-4}$ |
| LJP005 A549 24H-geldanamycin-1.11     | 6/78  | $4.23 \times 10^{-5}$ | $5.52 \times 10^{-4}$ |
| LJP005 MDAMB231 24H-geldanamycin-0.12 | 6/78  | $4.23 \times 10^{-5}$ | $5.51 \times 10^{-4}$ |
| LJP006 A375 24H-geldanamycin-0.12     | 8/163 | $5.84 \times 10^{-5}$ | $7.25 \times 10^{-4}$ |
| LJP006 HS578T 3H-geldanamycin-1.11    | 5/52  | $6.45 \times 10^{-5}$ | $7.82 \times 10^{-4}$ |
| LJP005 A549 24H-geldanamycin-3.33     | 7/123 | $6.75 \times 10^{-5}$ | $8.18 \times 10^{-4}$ |
| LJP006 MDAMB231 3H-geldanamycin-1.11  | 5/53  | $7.07 \times 10^{-5}$ | $8.48 \times 10^{-4}$ |
| LJP005 BT20 24H-geldanamycin-0.04     | 6/87  | $7.83 \times 10^{-5}$ | $9.20 \times 10^{-4}$ |
| LJP006 A549 24H-geldanamycin-3.33     | 6/87  | $7.83 \times 10^{-5}$ | $9.19 \times 10^{-4}$ |
| LJP005 PC3 24H-geldanamycin-3.33      | 6/89  | $8.89 \times 10^{-5}$ | $1.02 \times 10^{-3}$ |
| LJP006 HEPG2 24H-geldanamycin-10      | 6/94  | $1.20 \times 10^{-4}$ | $1.31 \times 10^{-3}$ |
| LJP005 HS578T 3H-geldanamycin-1.11    | 4/32  | $1.28 \times 10^{-4}$ | $1.39 \times 10^{-3}$ |
| LJP006 HME1 24H-geldanamycin-1.11     | 7/145 | $1.89 \times 10^{-4}$ | $1.92 \times 10^{-3}$ |
| LJP005 HS578T 3H-geldanamycin-3.33    | 4/36  | $2.04 \times 10^{-4}$ | $2.06 \times 10^{-3}$ |
| LJP005 MCF10A 24H-geldanamycin-10     | 5/67  | $2.17 \times 10^{-4}$ | $2.17 \times 10^{-3}$ |
| LJP006 MDAMB231 3H-geldanamycin-0.12  | 3/16  | $2.75 \times 10^{-4}$ | $2.66 \times 10^{-3}$ |
| LJP006 PC3 24H-geldanamycin-1.11      | 5/72  | $3.05 \times 10^{-4}$ | $2.90 \times 10^{-3}$ |
| LJP005 HS578T 3H-geldanamycin-10      | 4/40  | $3.09 \times 10^{-4}$ | $2.93 \times 10^{-3}$ |
| LJP005 BT20 24H-geldanamycin-3.33     | 5/73  | $3.25 \times 10^{-4}$ | $3.06 \times 10^{-3}$ |
| LJP005 HCC515 24H-geldanamycin-1.11   | 6/113 | $3.29 \times 10^{-4}$ | $3.09 \times 10^{-3}$ |
| LJP006 BT20 3H-geldanamycin-10        | 4/44  | $4.48 \times 10^{-4}$ | $3.98 \times 10^{-3}$ |
| LJP006 HEPG2 24H-geldanamycin-0.37    | 4/44  | $4.48 \times 10^{-4}$ | $3.97 \times 10^{-3}$ |
| LJP005 MDAMB231 24H-geldanamycin-1.11 | 4/46  | $5.31 \times 10^{-4}$ | $4.61 \times 10^{-3}$ |
| LJP006 SKBR3 3H-geldanamycin-0.12     | 3/20  | $5.47 \times 10^{-4}$ | $4.71 \times 10^{-3}$ |
| LJP006 LNCAP 24H-geldanamycin-10      | 7/173 | $5.51 \times 10^{-4}$ | $4.74 \times 10^{-3}$ |
| LJP006 HT29 24H-geldanamycin-1.11     | 5/85  | $6.56 \times 10^{-4}$ | $5.47 \times 10^{-3}$ |
| LJP005 SKBR3 3H-geldanamycin-0.04     | 4/49  | $6.77 \times 10^{-4}$ | $5.62 \times 10^{-3}$ |
| LJP005 HS578T 3H-geldanamycin-0.04    | 3/22  | $7.30 \times 10^{-4}$ | $6.01 \times 10^{-3}$ |

S25 Table: (Continued)

|                                       |       |                       |                       |
|---------------------------------------|-------|-----------------------|-----------------------|
| LJP006 SKBR3 3H-geldanamycin-1.11     | 4/51  | $7.89 \times 10^{-4}$ | $6.39 \times 10^{-3}$ |
| LJP005 MCF10A 24H-geldanamycin-3.33   | 6/134 | $8.13 \times 10^{-4}$ | $6.56 \times 10^{-3}$ |
| LJP005 BT20 24H-geldanamycin-10       | 4/52  | $8.49 \times 10^{-4}$ | $6.82 \times 10^{-3}$ |
| LJP006 MCF10A 24H-geldanamycin-0.12   | 6/137 | $9.12 \times 10^{-4}$ | $7.26 \times 10^{-3}$ |
| LJP005 SKBR3 3H-geldanamycin-3.33     | 4/53  | $9.12 \times 10^{-4}$ | $7.25 \times 10^{-3}$ |
| LJP006 HS578T 3H-geldanamycin-3.33    | 4/53  | $9.12 \times 10^{-4}$ | $7.24 \times 10^{-3}$ |
| LJP005 MDAMB231 24H-geldanamycin-0.37 | 4/54  | $9.79 \times 10^{-4}$ | $7.70 \times 10^{-3}$ |
| CPC014 NPC 24H-geldanamycin-10.0      | 6/139 | $9.84 \times 10^{-4}$ | $7.71 \times 10^{-3}$ |
| LJP006 HS578T 3H-geldanamycin-0.37    | 4/56  | $1.12 \times 10^{-3}$ | $8.60 \times 10^{-3}$ |
| LJP006 MCF10A 24H-geldanamycin-0.37   | 6/144 | $1.18 \times 10^{-3}$ | $9.01 \times 10^{-3}$ |
| LJP005 MCF10A 24H-geldanamycin-0.12   | 6/147 | $1.31 \times 10^{-3}$ | $9.80 \times 10^{-3}$ |
| LJP006 MCF10A 24H-geldanamycin-0.04   | 5/102 | $1.49 \times 10^{-3}$ | $1.09 \times 10^{-2}$ |
| LJP005 SKBR3 3H-geldanamycin-0.12     | 3/28  | $1.50 \times 10^{-3}$ | $1.09 \times 10^{-2}$ |
| CPC018 A549 24H-geldanamycin-10.0     | 5/104 | $1.62 \times 10^{-3}$ | $1.17 \times 10^{-2}$ |
| CPC009 MCF7 24H-geldanamycin-10.0     | 5/108 | $1.92 \times 10^{-3}$ | $1.35 \times 10^{-2}$ |
| LJP005 MDAMB231 3H-geldanamycin-3.33  | 3/31  | $2.02 \times 10^{-3}$ | $1.40 \times 10^{-2}$ |
| LJP005 MCF10A 24H-geldanamycin-1.11   | 5/110 | $2.08 \times 10^{-3}$ | $1.43 \times 10^{-2}$ |
| LJP006 MCF7 24H-geldanamycin-0.04     | 3/33  | $2.42 \times 10^{-3}$ | $1.63 \times 10^{-2}$ |
| LJP005 MDAMB231 3H-geldanamycin-1.11  | 3/34  | $2.64 \times 10^{-3}$ | $1.75 \times 10^{-2}$ |
| LJP006 MDAMB231 3H-geldanamycin-3.33  | 3/34  | $2.64 \times 10^{-3}$ | $1.75 \times 10^{-2}$ |
| LJP005 MCF10A 24H-geldanamycin-0.04   | 5/119 | $2.93 \times 10^{-3}$ | $1.90 \times 10^{-2}$ |
| CPC006 SNUC4 6H-geldanamycin-10.0     | 4/75  | $3.30 \times 10^{-3}$ | $2.10 \times 10^{-2}$ |
| LJP006 HT29 24H-geldanamycin-0.37     | 3/37  | $3.37 \times 10^{-3}$ | $2.13 \times 10^{-2}$ |
| LJP005 MDAMB231 3H-geldanamycin-0.04  | 3/38  | $3.64 \times 10^{-3}$ | $2.27 \times 10^{-2}$ |
| LJP005 MDAMB231 3H-geldanamycin-10    | 3/38  | $3.64 \times 10^{-3}$ | $2.27 \times 10^{-2}$ |
| LJP006 MCF10A 24H-geldanamycin-1.11   | 5/129 | $4.14 \times 10^{-3}$ | $2.52 \times 10^{-2}$ |
| LJP005 MCF7 24H-geldanamycin-1.11     | 5/130 | $4.27 \times 10^{-3}$ | $2.58 \times 10^{-2}$ |
| LJP006 MCF10A 24H-geldanamycin-3.33   | 5/130 | $4.27 \times 10^{-3}$ | $2.58 \times 10^{-2}$ |
| LJP006 HCC515 24H-geldanamycin-10     | 4/83  | $4.74 \times 10^{-3}$ | $2.81 \times 10^{-2}$ |
| LJP006 HME1 3H-geldanamycin-0.12      | 3/42  | $4.83 \times 10^{-3}$ | $2.84 \times 10^{-2}$ |
| LJP006 LNCAP 3H-geldanamycin-1.11     | 3/43  | $5.16 \times 10^{-3}$ | $2.99 \times 10^{-2}$ |
| CPC006 NCIH1694 6H-geldanamycin-10.0  | 3/44  | $5.51 \times 10^{-3}$ | $3.17 \times 10^{-2}$ |
| LJP006 HME1 3H-geldanamycin-0.37      | 3/44  | $5.51 \times 10^{-3}$ | $3.16 \times 10^{-2}$ |
| LJP005 HS578T 24H-geldanamycin-0.37   | 4/88  | $5.83 \times 10^{-3}$ | $3.31 \times 10^{-2}$ |
| CPC006 THP1 6H-geldanamycin-10.0      | 4/90  | $6.31 \times 10^{-3}$ | $3.51 \times 10^{-2}$ |
| CPC013 A549 6H-geldanamycin-10.0      | 4/93  | $7.08 \times 10^{-3}$ | $3.84 \times 10^{-2}$ |
| LJP005 PC3 24H-geldanamycin-1.11      | 4/93  | $7.08 \times 10^{-3}$ | $3.84 \times 10^{-2}$ |
| CPC005 HT29 24H-geldanamycin-10.0     | 5/147 | $7.14 \times 10^{-3}$ | $3.87 \times 10^{-2}$ |
| CPC004 A375 6H-geldanamycin-10.0      | 3/49  | $7.44 \times 10^{-3}$ | $4.01 \times 10^{-2}$ |
| CPC004 VCAP 24H-geldanamycin-10.0     | 4/95  | $7.62 \times 10^{-3}$ | $4.07 \times 10^{-2}$ |
| CPC016 MCF7 24H-geldanamycin-10.0     | 5/150 | $7.76 \times 10^{-3}$ | $4.14 \times 10^{-2}$ |
| LJP005 HT29 24H-geldanamycin-3.33     | 5/150 | $7.76 \times 10^{-3}$ | $4.14 \times 10^{-2}$ |
| CPC018 ASC 24H-geldanamycin-10.0      | 3/51  | $8.31 \times 10^{-3}$ | $4.37 \times 10^{-2}$ |
| LJP006 BT20 24H-geldanamycin-0.04     | 3/51  | $8.31 \times 10^{-3}$ | $4.36 \times 10^{-2}$ |
| CPC006 U937 6H-geldanamycin-10.0      | 4/98  | $8.49 \times 10^{-3}$ | $4.44 \times 10^{-2}$ |
| LJP005 MDAMB231 3H-geldanamycin-0.37  | 3/52  | $8.77 \times 10^{-3}$ | $4.56 \times 10^{-2}$ |
| CPC005 A549 24H-geldanamycin-10.0     | 5/156 | $9.11 \times 10^{-3}$ | $4.70 \times 10^{-2}$ |
| LJP005 BT20 3H-geldanamycin-3.33      | 2/18  | $9.27 \times 10^{-3}$ | $4.75 \times 10^{-2}$ |
