# Supplementary material for: A new advanced in silico drug discovery method for novel coronavirus (SARS-CoV-2) with tensor decomposition-based unsupervised feature extraction
Source: PubMed Central journal article supplement (PMC7485840; doi:10.1371/journal.pone.0238907), 2020-09-11
Supplement: pone.0238907.s026.pdf [file pone.0238907.s026.pdf]

S26 Table: Genes whose expression is altered by SARS-CoV-2-related viruses that significantly interact with the 163 genes selected by TD-based unsupervised FE and enriched by “Drug Perturbations from GEO up/down” in Enrichr

| Term                                                                  | Overlap | P-value                | Adjusted P-value       |
|-----------------------------------------------------------------------|---------|------------------------|------------------------|
| Drug Perturbations from GEO up                                        |         |                        |                        |
| MK-886 CID 3651377 human GSE3202 sample 3193                          | 54/368  | $3.90 \times 10^{-53}$ | $3.53 \times 10^{-50}$ |
| fluticasone 5311101 human GSE15823 sample 3090                        | 53/351  | $8.70 \times 10^{-53}$ | $3.94 \times 10^{-50}$ |
| 1-Naphthyl isothiocyanate 11080 rat GSE5509 sample 3568               | 50/301  | $7.71 \times 10^{-52}$ | $2.33 \times 10^{-49}$ |
| quercetin 5280343 human GSE7259 sample 3416                           | 50/327  | $6.03 \times 10^{-50}$ | $1.36 \times 10^{-47}$ |
| N-METHYLFORMAMIDE 31254 rat GSE5509 sample 3570                       | 46/283  | $4.37 \times 10^{-47}$ | $7.93 \times 10^{-45}$ |
| NICKEL 935 human GSE6907 sample 3531                                  | 46/288  | $1.02 \times 10^{-46}$ | $1.54 \times 10^{-44}$ |
| apratoxin A 6326668 human GSE2742 sample 3070                         | 43/246  | $2.30 \times 10^{-45}$ | $2.98 \times 10^{-43}$ |
| quercetin 5280343 human GSE7259 sample 3415                           | 47/336  | $6.05 \times 10^{-45}$ | $6.85 \times 10^{-43}$ |
| sapphyrin PCI-2050 (1.25 &frac14;M) 9855235 human GSE6400 sample 3101 | 48/367  | $1.71 \times 10^{-44}$ | $1.72 \times 10^{-42}$ |
| rosiglitazone DB00412 human GSE7035 sample 2810                       | 43/281  | $9.52 \times 10^{-43}$ | $8.63 \times 10^{-41}$ |
| Drug Perturbations from GEO down                                      |         |                        |                        |
| gatifloxacin 5379 human GSE9166 sample 2626                           | 48/266  | $1.61 \times 10^{-51}$ | $1.46 \times 10^{-48}$ |
| atorvastatin DB01076 human GSE2450 sample 2484                        | 46/250  | $1.02 \times 10^{-49}$ | $4.62 \times 10^{-47}$ |
| bexarotene DB00307 human GSE12791 sample 2681                         | 46/253  | $1.84 \times 10^{-49}$ | $5.54 \times 10^{-47}$ |
| clinafloxacin 60063 human GSE9166 sample 2625                         | 55/470  | $1.30 \times 10^{-48}$ | $2.95 \times 10^{-46}$ |
| motexafin gadolinium (12 h) DB05428 human GSE2189 sample 3127         | 48/320  | $1.89 \times 10^{-47}$ | $3.41 \times 10^{-45}$ |
| BPDE 41322 human GSE19510 sample 3379                                 | 47/300  | $2.36 \times 10^{-47}$ | $3.55 \times 10^{-45}$ |
| trovafloxacin 62959 human GSE9166 sample 2629                         | 53/459  | $1.98 \times 10^{-46}$ | $2.55 \times 10^{-44}$ |
| HYPOCHLOROUS ACID 24341 human GSE11630 sample 3199                    | 40/204  | $2.85 \times 10^{-44}$ | $3.21 \times 10^{-42}$ |
| trovafloxacin DB00685 human GSE9166 sample 3036                       | 51/451  | $4.05 \times 10^{-44}$ | $4.06 \times 10^{-42}$ |
| doxycycline DB00254 human GSE2624 sample 3077                         | 48/391  | $3.82 \times 10^{-43}$ | $3.45 \times 10^{-41}$ |
