# Supplementary material for: A new advanced in silico drug discovery method for novel coronavirus (SARS-CoV-2) with tensor decomposition-based unsupervised feature extraction
Source: PubMed Central journal article supplement (PMC7485840; doi:10.1371/journal.pone.0238907), 2020-09-11
Supplement: pone.0238907.s027.pdf [file pone.0238907.s027.pdf]

S27 Table: Genes whose expression is altered by SARS-CoV-2-related viruses that significantly interact with the 163 genes selected by TD-based unsupervised FE and enriched by “Drug Matrix” in Enrichr

| Term                                                                    | Overlap | P-value                | Adjusted P-value       |
|-------------------------------------------------------------------------|---------|------------------------|------------------------|
| 2-Amino-4-Nitrophenol-625 mg/kg in CMC-Rat-Kidney-1d-up                 | 26/300  | $2.01 \times 10^{-19}$ | $1.59 \times 10^{-15}$ |
| Allyl Alcohol-32 mg/kg in Saline-Rat-Liver-1d-up                        | 25/291  | $1.30 \times 10^{-18}$ | $5.12 \times 10^{-15}$ |
| Meloxicam-33 mg/kg in Corn Oil-Rat-Kidney-5d-up                         | 23/261  | $1.96 \times 10^{-17}$ | $5.14 \times 10^{-14}$ |
| Lipopolysaccharide E. Coli O55:B5-1.25 mg/kg in Saline-Rat-Kidney-1d-up | 24/295  | $2.36 \times 10^{-17}$ | $4.64 \times 10^{-14}$ |
| 44'-Methylenedianiline-81 mg/kg in Corn Oil-Rat-Liver-3d-up             | 25/333  | $3.27 \times 10^{-17}$ | $5.16 \times 10^{-14}$ |
| Gentamicin-40 mg/kg in Saline-Rat-Kidney-14d-up                         | 24/309  | $6.83 \times 10^{-17}$ | $8.96 \times 10^{-14}$ |
| Lead(IV) Acetate-600 mg/kg in Saline-Rat-Kidney-5d-up                   | 24/309  | $6.83 \times 10^{-17}$ | $7.68 \times 10^{-14}$ |
| Dibromochloromethane-325 mg/kg in CMC-Rat-Kidney-3d-up                  | 24/312  | $8.51 \times 10^{-17}$ | $8.38 \times 10^{-14}$ |
| Allopurinol-175 mg/kg in Corn Oil-Rat-Kidney-3d-up                      | 24/329  | $2.84 \times 10^{-16}$ | $2.49 \times 10^{-13}$ |
| Benzyl Acetate-1868 mg/kg in CMC-Rat-Kidney-3d-up                       | 24/330  | $3.05 \times 10^{-16}$ | $2.40 \times 10^{-13}$ |
