# Supplementary material for: A new advanced in silico drug discovery method for novel coronavirus (SARS-CoV-2) with tensor decomposition-based unsupervised feature extraction
Source: PubMed Central journal article supplement (PMC7485840; doi:10.1371/journal.pone.0238907), 2020-09-11
Supplement: pone.0238907.s028.pdf [file pone.0238907.s028.pdf]

S28 Table: List of *in silico* screened drugs [31] whose target genes were also enriched in the 163 genes selected by TD-based unsupervised FE.

| Term                                              | Overlap | P-value                | Adjusted P-value       |
|---------------------------------------------------|---------|------------------------|------------------------|
| Drug Perturbations from GEO up                    |         |                        |                        |
| doxycycline DB00254 human GSE2624 sample 3076     | 38/272  | $3.93 \times 10^{-36}$ | $1.32 \times 10^{-34}$ |
| doxycycline DB00254 human GSE2624 sample 3075     | 28/242  | $2.49 \times 10^{-24}$ | $2.02 \times 10^{-23}$ |
| doxycycline DB00254 human GSE2624 sample 3077     | 23/209  | $1.30 \times 10^{-19}$ | $6.43 \times 10^{-19}$ |
| doxycycline DB00254 mouse GSE29848 sample 3208    | 25/291  | $1.30 \times 10^{-18}$ | $5.84 \times 10^{-18}$ |
| doxycycline DB00254 mouse GSE29848 sample 3209    | 24/267  | $2.35 \times 10^{-18}$ | $1.03 \times 10^{-17}$ |
| doxycycline DB00254 human GSE2624 sample 3074     | 16/175  | $1.07 \times 10^{-12}$ | $2.89 \times 10^{-12}$ |
| doxycycline DB00254 mouse GSE29848 sample 3207    | 17/225  | $4.54 \times 10^{-12}$ | $1.16 \times 10^{-11}$ |
| ascorbic acid 54670067 human GSE11919 sample 3190 | 15/313  | $4.42 \times 10^{-8}$  | $8.64 \times 10^{-8}$  |
| isotretinoin DB00982 human GSE10432 sample 2772   | 19/308  | $8.45 \times 10^{-12}$ | $2.10 \times 10^{-11}$ |
| isotretinoin 5282379 human GSE10433 sample 2498   | 10/245  | $3.39 \times 10^{-5}$  | $5.51 \times 10^{-5}$  |
| pioglitazone DB01132 rat GSE21329 sample 2843     | 40/400  | $3.44 \times 10^{-32}$ | $7.08 \times 10^{-31}$ |
| pioglitazone DB01132 rat GSE21329 sample 2842     | 20/349  | $8.84 \times 10^{-12}$ | $2.18 \times 10^{-11}$ |
| pioglitazone 4829 mouse GSE1458 sample 2587       | 19/318  | $1.47 \times 10^{-11}$ | $3.55 \times 10^{-11}$ |
| pioglitazone DB01132 rat GSE20219 sample 2794     | 18/292  | $3.13 \times 10^{-11}$ | $7.40 \times 10^{-11}$ |
| pioglitazone DB01132 human GSE8157 sample 2796    | 13/331  | $3.36 \times 10^{-6}$  | $5.89 \times 10^{-6}$  |
| pioglitazone DB01132 rat GSE21329 sample 2841     | 11/279  | $1.88 \times 10^{-5}$  | $3.11 \times 10^{-5}$  |
| pioglitazone DB01132 rat GSE20219 sample 2795     | 9/330   | $1.58 \times 10^{-3}$  | $2.31 \times 10^{-3}$  |
| Drug Perturbations from GEO down                  |         |                        |                        |
| doxycycline DB00254 human GSE2624 sample 3077     | 48/391  | $3.82 \times 10^{-43}$ | $3.45 \times 10^{-41}$ |
| doxycycline DB00254 human GSE2624 sample 3074     | 39/425  | $6.14 \times 10^{-30}$ | $9.09 \times 10^{-29}$ |
| doxycycline DB00254 human GSE2624 sample 3076     | 30/328  | $5.30 \times 10^{-23}$ | $4.02 \times 10^{-22}$ |
| doxycycline DB00254 human GSE2624 sample 3075     | 27/358  | $1.40 \times 10^{-18}$ | $6.83 \times 10^{-18}$ |
| doxycycline DB00254 mouse GSE29848 sample 3207    | 21/375  | $3.98 \times 10^{-12}$ | $1.21 \times 10^{-11}$ |
| doxycycline DB00254 mouse GSE29848 sample 3208    | 16/309  | $5.14 \times 10^{-9}$  | $1.21 \times 10^{-8}$  |
| doxycycline DB00254 mouse GSE29848 sample 3209    | 14/333  | $6.21 \times 10^{-7}$  | $1.28 \times 10^{-6}$  |
| ascorbic acid 54670067 human GSE11919 sample 3190 | 40/287  | $5.09 \times 10^{-38}$ | $1.84 \times 10^{-36}$ |
| isotretinoin DB00982 human GSE10432 sample 2772   | 7/292   | $1.02 \times 10^{-2}$  | $1.57 \times 10^{-2}$  |
| pioglitazone DB01132 rat GSE21329 sample 2841     | 43/321  | $3.57 \times 10^{-40}$ | $1.90 \times 10^{-38}$ |
| pioglitazone 4829 mouse GSE1458 sample 2587       | 24/282  | $8.34 \times 10^{-18}$ | $3.77 \times 10^{-17}$ |
| pioglitazone DB01132 rat GSE21329 sample 2842     | 18/251  | $2.50 \times 10^{-12}$ | $7.64 \times 10^{-12}$ |
| pioglitazone DB01132 rat GSE20219 sample 2794     | 17/308  | $6.28 \times 10^{-10}$ | $1.62 \times 10^{-9}$  |
| pioglitazone DB01132 human GSE8157 sample 2796    | 14/269  | $4.58 \times 10^{-8}$  | $1.02 \times 10^{-7}$  |
| pioglitazone DB01132 rat GSE20219 sample 2795     | 12/270  | $2.29 \times 10^{-6}$  | $4.52 \times 10^{-6}$  |
| pioglitazone DB01132 rat GSE21329 sample 2843     | 7/200   | $1.29 \times 10^{-3}$  | $2.14 \times 10^{-3}$  |
| tibolone 444008 human GSE12446 sample 3204        | 30/313  | $1.34 \times 10^{-23}$ | $1.14 \times 10^{-22}$ |
