# Supplementary material for: A new advanced in silico drug discovery method for novel coronavirus (SARS-CoV-2) with tensor decomposition-based unsupervised feature extraction
Source: PubMed Central journal article supplement (PMC7485840; doi:10.1371/journal.pone.0238907), 2020-09-11
Supplement: pone.0238907.s029.pdf [file pone.0238907.s029.pdf]

S29 Table: List of *in silico* screened drugs [25] whose target genes are also among the 163 genes selected by TD based unsupervised FE.

| Term                                         | Overlap | P-value                | Adjusted P-value       |
|----------------------------------------------|---------|------------------------|------------------------|
| Drug Perturbations from GEO up               |         |                        |                        |
| quercetin 5280343 human GSE7259 sample 3416  | 50/327  | $6.03 \times 10^{-50}$ | $1.36 \times 10^{-47}$ |
| quercetin 5280343 human GSE7259 sample 3415  | 47/336  | $6.05 \times 10^{-45}$ | $6.85 \times 10^{-43}$ |
| quercetin 5280343 rat GSE7479 sample 3409    | 38/394  | $5.73 \times 10^{-30}$ | $9.80 \times 10^{-29}$ |
| quercetin 5280343 human GSE13899 sample 3182 | 19/307  | $7.99 \times 10^{-12}$ | $1.99 \times 10^{-11}$ |
| quercetin DB04216 mouse GSE38136 sample 3436 | 17/297  | $3.59 \times 10^{-10}$ | $7.85 \times 10^{-10}$ |
| quercetin DB04216 mouse GSE38141 sample 3435 | 16/280  | $1.25 \times 10^{-9}$  | $2.67 \times 10^{-9}$  |
| quercetin DB04216 mouse GSE38136 sample 3438 | 15/254  | $2.69 \times 10^{-9}$  | $5.66 \times 10^{-9}$  |
| quercetin DB04216 mouse GSE38067 sample 3440 | 13/227  | $4.62 \times 10^{-8}$  | $9.01 \times 10^{-8}$  |
| quercetin DB04216 mouse GSE38136 sample 3437 | 16/472  | $1.66 \times 10^{-6}$  | $2.96 \times 10^{-6}$  |
| quercetin DB04216 mouse GSE38067 sample 3441 | 7/114   | $4.16 \times 10^{-5}$  | $6.73 \times 10^{-5}$  |
| quercetin DB04216 mouse GSE4262 sample 3428  | 11/360  | $1.85 \times 10^{-4}$  | $2.86 \times 10^{-4}$  |
| quercetin DB04216 mouse GSE4262 sample 3429  | 8/229   | $5.94 \times 10^{-4}$  | $8.90 \times 10^{-4}$  |
| quercetin DB04216 mouse GSE4262 sample 3427  | 9/360   | $2.84 \times 10^{-3}$  | $4.06 \times 10^{-3}$  |
| quercetin DB04216 mouse GSE4262 sample 3433  | 8/323   | $5.09 \times 10^{-3}$  | $7.12 \times 10^{-3}$  |
| quercetin DB04216 human GSE15162 sample 3444 | 7/323   | $1.69 \times 10^{-2}$  | $2.25 \times 10^{-2}$  |
| quercetin DB04216 mouse GSE4262 sample 3434  | 7/324   | $1.71 \times 10^{-2}$  | $2.27 \times 10^{-2}$  |
| Drug Perturbations from GEO down             |         |                        |                        |
| quercetin DB04216 mouse GSE38067 sample 3441 | 35/486  | $2.68 \times 10^{-23}$ | $2.11 \times 10^{-22}$ |
| quercetin 5280343 human GSE13899 sample 3182 | 28/293  | $5.05 \times 10^{-22}$ | $3.40 \times 10^{-21}$ |
| quercetin 5280343 rat GSE7479 sample 3409    | 16/206  | $1.31 \times 10^{-11}$ | $3.90 \times 10^{-11}$ |
| quercetin DB04216 mouse GSE38141 sample 3435 | 17/320  | $1.13 \times 10^{-9}$  | $2.79 \times 10^{-9}$  |
| quercetin DB04216 mouse GSE38136 sample 3436 | 16/303  | $3.89 \times 10^{-9}$  | $9.26 \times 10^{-9}$  |
| quercetin DB04216 mouse GSE38067 sample 3440 | 15/373  | $4.27 \times 10^{-7}$  | $8.83 \times 10^{-7}$  |
| quercetin 5280343 human GSE7259 sample 3415  | 12/264  | $1.81 \times 10^{-6}$  | $3.59 \times 10^{-6}$  |
| quercetin DB04216 mouse GSE38136 sample 3438 | 13/346  | $5.44 \times 10^{-6}$  | $1.05 \times 10^{-5}$  |
| quercetin DB04216 mouse GSE38136 sample 3437 | 8/128   | $1.02 \times 10^{-5}$  | $1.92 \times 10^{-5}$  |
| quercetin DB04216 mouse GSE4262 sample 3430  | 11/312  | $5.22 \times 10^{-5}$  | $9.45 \times 10^{-5}$  |
| quercetin DB04216 mouse GSE4262 sample 3431  | 10/348  | $5.87 \times 10^{-4}$  | $9.96 \times 10^{-4}$  |
| quercetin 5280343 human GSE7259 sample 3416  | 8/273   | $1.83 \times 10^{-3}$  | $3.02 \times 10^{-3}$  |
| quercetin DB04216 mouse GSE4262 sample 3428  | 7/240   | $3.59 \times 10^{-3}$  | $5.74 \times 10^{-3}$  |
| quercetin DB04216 mouse GSE4262 sample 3429  | 7/371   | $3.27 \times 10^{-2}$  | $4.73 \times 10^{-2}$  |
