# Supplementary material for: A new advanced in silico drug discovery method for novel coronavirus (SARS-CoV-2) with tensor decomposition-based unsupervised feature extraction
Source: PubMed Central journal article supplement (PMC7485840; doi:10.1371/journal.pone.0238907), 2020-09-11
Supplement: pone.0238907.s030.pdf [file pone.0238907.s030.pdf]

S30 Table: Five Drugs ranked within top 10 in the previous study but not in the present study in “DrugMatrix” category in Enrichr. They were still significantly enriched for the selected 163 genes. If there were more than ten hits, they were omitted.

| Term                                                    | Overlap | P-value                | Adjusted P-value       |
|---------------------------------------------------------|---------|------------------------|------------------------|
| Primaquine-45 mg/kg in CMC-Rat-Liver-5d-up              | 18/315  | $1.09 \times 10^{-10}$ | $3.34 \times 10^{-9}$  |
| Primaquine-45 mg/kg in CMC-Rat-Liver-1d-up              | 15/337  | $1.16 \times 10^{-7}$  | $7.37 \times 10^{-7}$  |
| Primaquine-45 mg/kg in CMC-Rat-Liver-3d-up              | 14/316  | $3.31 \times 10^{-7}$  | $1.66 \times 10^{-6}$  |
| Primaquine-45 mg/kg in CMC-Rat-Liver-3d-dn              | 9/284   | $5.51 \times 10^{-4}$  | $8.62 \times 10^{-4}$  |
| Primaquine-45 mg/kg in CMC-Rat-Liver-5d-dn              | 7/285   | $8.98 \times 10^{-3}$  | $1.06 \times 10^{-2}$  |
| Cytarabine-487 mg/kg in Saline-Rat-Bone marrow-1d-up    | 17/326  | $1.49 \times 10^{-9}$  | $2.47 \times 10^{-8}$  |
| Cytarabine-23 mg/kg in Saline-Rat-Liver-0.25d-up        | 16/313  | $6.17 \times 10^{-9}$  | $7.17 \times 10^{-8}$  |
| Cytarabine-487 mg/kg in Saline-Rat-Liver-1d-dn          | 14/237  | $9.28 \times 10^{-9}$  | $9.81 \times 10^{-8}$  |
| Cytarabine-23 mg/kg in Saline-Rat-Bone marrow-0.25d-up  | 17/385  | $1.79 \times 10^{-8}$  | $1.66 \times 10^{-7}$  |
| Cytarabine-23 mg/kg in Saline-Rat-Spleen-3d-up          | 15/299  | $2.42 \times 10^{-8}$  | $2.12 \times 10^{-7}$  |
| Cytarabine-487 mg/kg in Saline-Rat-Liver-5d-dn          | 14/291  | $1.21 \times 10^{-7}$  | $7.59 \times 10^{-7}$  |
| Cytarabine-23 mg/kg in Saline-Rat-Liver-5d-dn           | 14/307  | $2.33 \times 10^{-7}$  | $1.26 \times 10^{-6}$  |
| Cytarabine-487 mg/kg in Saline-Rat-Kidney-5d-dn         | 14/319  | $3.71 \times 10^{-7}$  | $1.84 \times 10^{-6}$  |
| Cytarabine-487 mg/kg in Saline-Rat-Kidney-3d-dn         | 14/327  | $4.99 \times 10^{-7}$  | $2.35 \times 10^{-6}$  |
| Cytarabine-487 mg/kg in Saline-Rat-Spleen-1d-up         | 14/329  | $5.37 \times 10^{-7}$  | $2.49 \times 10^{-6}$  |
| Cytarabine-23 mg/kg in Saline-Rat-Spleen-0.25d-up       | 14/344  | $9.14 \times 10^{-7}$  | $3.83 \times 10^{-6}$  |
| (additional 31 hits with less significance are omitted) |         |                        |                        |
| Pyrogallol-1000 mg/kg in Water-Rat-Liver-5d-up          | 14/304  | $2.07 \times 10^{-7}$  | $1.14 \times 10^{-6}$  |
| Pyrogallol-1000 mg/kg in Water-Rat-Liver-1d-up          | 15/409  | $1.35 \times 10^{-6}$  | $5.23 \times 10^{-6}$  |
| Pyrogallol-1000 mg/kg in Water-Rat-Liver-5d-dn          | 12/296  | $5.88 \times 10^{-6}$  | $1.76 \times 10^{-5}$  |
| Pyrogallol-1000 mg/kg in Water-Rat-Liver-3d-up          | 13/349  | $5.97 \times 10^{-6}$  | $1.78 \times 10^{-5}$  |
| Pyrogallol-1000 mg/kg in Water-Rat-Liver-3d-dn          | 7/251   | $4.59 \times 10^{-3}$  | $5.69 \times 10^{-3}$  |
| Pyrogallol-1000 mg/kg in Water-Rat-Liver-1d-dn          | 5/191   | $2.03 \times 10^{-2}$  | $2.26 \times 10^{-2}$  |
| Catechol-195 mg/kg in Saline-Rat-Liver-0.25d-up         | 19/290  | $2.94 \times 10^{-12}$ | $2.41 \times 10^{-10}$ |
| Catechol-40 mg/kg in Saline-Rat-Liver-0.25d-up          | 19/305  | $7.13 \times 10^{-12}$ | $4.16 \times 10^{-10}$ |
| Catechol-195 mg/kg in Saline-Rat-Bone marrow-1d-dn      | 16/305  | $4.27 \times 10^{-9}$  | $5.49 \times 10^{-8}$  |
| Catechol-40 mg/kg in Saline-Rat-Kidney-0.25d-dn         | 16/319  | $8.08 \times 10^{-9}$  | $8.82 \times 10^{-8}$  |
| Catechol-40 mg/kg in Saline-Rat-Kidney-3d-dn            | 15/294  | $1.93 \times 10^{-8}$  | $1.77 \times 10^{-7}$  |
| Catechol-40 mg/kg in Saline-Rat-Bone marrow-0.25d-dn    | 15/306  | $3.28 \times 10^{-8}$  | $2.67 \times 10^{-7}$  |
| Catechol-40 mg/kg in Saline-Rat-Bone marrow-1d-dn       | 15/307  | $3.43 \times 10^{-8}$  | $2.76 \times 10^{-7}$  |
| Catechol-195 mg/kg in Saline-Rat-Spleen-1d-up           | 15/320  | $5.91 \times 10^{-8}$  | $4.31 \times 10^{-7}$  |
| Catechol-195 mg/kg in Saline-Rat-Kidney-5d-dn           | 14/281  | $7.87 \times 10^{-8}$  | $5.39 \times 10^{-7}$  |
| Catechol-195 mg/kg in Saline-Rat-Bone marrow-5d-dn      | 14/310  | $2.62 \times 10^{-7}$  | $1.38 \times 10^{-6}$  |
| (additional 27 hits with less significance are omitted) |         |                        |                        |
| Neomycin-877 mg/kg in Corn Oil-Rat-Kidney-1d-dn         | 14/264  | $3.62 \times 10^{-8}$  | $2.88 \times 10^{-7}$  |
| Neomycin-877 mg/kg in Corn Oil-Rat-Liver-5d-up          | 14/323  | $4.31 \times 10^{-7}$  | $2.08 \times 10^{-6}$  |
| Neomycin-56 mg/kg in Corn Oil-Rat-Kidney-0.25d-dn       | 12/256  | $1.31 \times 10^{-6}$  | $5.12 \times 10^{-6}$  |
| Neomycin-877 mg/kg in Corn Oil-Rat-Kidney-3d-up         | 13/311  | $1.69 \times 10^{-6}$  | $6.23 \times 10^{-6}$  |
| Neomycin-56 mg/kg in Corn Oil-Rat-Kidney-5d-dn          | 12/270  | $2.29 \times 10^{-6}$  | $7.99 \times 10^{-6}$  |
| Neomycin-56 mg/kg in Corn Oil-Rat-Liver-5d-up           | 12/279  | $3.21 \times 10^{-6}$  | $1.06 \times 10^{-5}$  |
| Neomycin-56 mg/kg in Corn Oil-Rat-Kidney-3d-dn          | 11/233  | $3.43 \times 10^{-6}$  | $1.12 \times 10^{-5}$  |
| Neomycin-877 mg/kg in Corn Oil-Rat-Kidney-3d-dn         | 12/289  | $4.60 \times 10^{-6}$  | $1.44 \times 10^{-5}$  |
| Neomycin-877 mg/kg in Corn Oil-Rat-Liver-0.25d-dn       | 12/296  | $5.88 \times 10^{-6}$  | $1.76 \times 10^{-5}$  |
| Neomycin-56 mg/kg in Corn Oil-Rat-Liver-3d-dn           | 12/309  | $9.07 \times 10^{-6}$  | $2.50 \times 10^{-5}$  |
| (additional 20 hits with less significance are omitted) |         |                        |                        |
