# Supplementary material for: A new advanced in silico drug discovery method for novel coronavirus (SARS-CoV-2) with tensor decomposition-based unsupervised feature extraction
Source: PubMed Central journal article supplement (PMC7485840; doi:10.1371/journal.pone.0238907), 2020-09-11
Supplement: pone.0238907.s031.pdf [file pone.0238907.s031.pdf]

S31 Table: Four Drugs ranked within top 10 in the previous study but not in the present study in “Drug Pert from GEO up/down” category in Enrichr. They were still significantly enriched toward the selected 163 genes.

| Term                                            | Overlap | P-value                | Adjusted P-value       |
|-------------------------------------------------|---------|------------------------|------------------------|
| Drug Perturbations from GEO up                  |         |                        |                        |
| fenretinide 5288209 rat GSE3952 sample 3561     | 35/397  | $2.98 \times 10^{-26}$ | $2.81 \times 10^{-25}$ |
| fenretinide 5288209 rat GSE3952 sample 3559     | 7/160   | $3.45 \times 10^{-4}$  | $5.30 \times 10^{-4}$  |
| pioglitazone DB01132 rat GSE21329 sample 2843   | 40/400  | $3.44 \times 10^{-32}$ | $7.08 \times 10^{-31}$ |
| pioglitazone DB01132 rat GSE21329 sample 2842   | 20/349  | $8.84 \times 10^{-12}$ | $2.18 \times 10^{-11}$ |
| pioglitazone 4829 mouse GSE1458 sample 2587     | 19/318  | $1.47 \times 10^{-11}$ | $3.55 \times 10^{-11}$ |
| pioglitazone DB01132 rat GSE20219 sample 2794   | 18/292  | $3.13 \times 10^{-11}$ | $7.40 \times 10^{-11}$ |
| pioglitazone DB01132 human GSE8157 sample 2796  | 13/331  | $3.36 \times 10^{-6}$  | $5.89 \times 10^{-6}$  |
| pioglitazone DB01132 rat GSE21329 sample 2841   | 11/279  | $1.88 \times 10^{-5}$  | $3.11 \times 10^{-5}$  |
| pioglitazone DB01132 rat GSE20219 sample 2795   | 9/330   | $1.58 \times 10^{-3}$  | $2.31 \times 10^{-3}$  |
| decitabine DB01262 human GSE29077 sample 2546   | 31/243  | $3.22 \times 10^{-28}$ | $3.99 \times 10^{-27}$ |
| decitabine DB01262 human GSE29077 sample 2538   | 31/263  | $3.84 \times 10^{-27}$ | $4.05 \times 10^{-26}$ |
| decitabine DB01262 human GSE9118 sample 2703    | 31/271  | $9.77 \times 10^{-27}$ | $9.73 \times 10^{-26}$ |
| decitabine DB01262 human GSE29077 sample 2539   | 26/279  | $3.22 \times 10^{-20}$ | $1.69 \times 10^{-19}$ |
| decitabine 451668 mouse GSE4768 sample 3103     | 25/251  | $3.55 \times 10^{-20}$ | $1.85 \times 10^{-19}$ |
| decitabine 451668 mouse GSE4768 sample 3105     | 26/287  | $6.59 \times 10^{-20}$ | $3.36 \times 10^{-19}$ |
| decitabine DB01262 human GSE29077 sample 2540   | 19/300  | $5.34 \times 10^{-12}$ | $1.35 \times 10^{-11}$ |
| decitabine DB01262 human GSE29077 sample 2547   | 19/304  | $6.73 \times 10^{-12}$ | $1.69 \times 10^{-11}$ |
| decitabine DB01262 human GSE29077 sample 2548   | 19/316  | $1.32 \times 10^{-11}$ | $3.21 \times 10^{-11}$ |
| decitabine 451668 mouse GSE4768 sample 3108     | 12/374  | $5.91 \times 10^{-5}$  | $9.43 \times 10^{-5}$  |
| trogliatrazone DB00197 rat GSE21329 sample 2833 | 36/408  | $5.13 \times 10^{-27}$ | $5.34 \times 10^{-26}$ |
| trogliatrazone DB00197 rat GSE21329 sample 2834 | 28/198  | $8.28 \times 10^{-27}$ | $8.42 \times 10^{-26}$ |
| trogliatrazone 5591 mouse GSE1458 sample 2589   | 26/305  | $3.05 \times 10^{-19}$ | $1.45 \times 10^{-18}$ |
| trogliatrazone DB00197 rat GSE21329 sample 2832 | 10/245  | $3.39 \times 10^{-5}$  | $5.52 \times 10^{-5}$  |
| Drug Perturbations from GEO down                |         |                        |                        |
| fenretinide 5288209 rat GSE3952 sample 3559     | 38/440  | $3.49 \times 10^{-28}$ | $4.56 \times 10^{-27}$ |
| fenretinide 5288209 rat GSE3952 sample 3561     | 22/203  | $1.18 \times 10^{-18}$ | $5.84 \times 10^{-18}$ |
| pioglitazone DB01132 rat GSE21329 sample 2841   | 43/321  | $3.57 \times 10^{-40}$ | $1.90 \times 10^{-38}$ |
| pioglitazone 4829 mouse GSE1458 sample 2587     | 24/282  | $8.34 \times 10^{-18}$ | $3.77 \times 10^{-17}$ |
| pioglitazone DB01132 rat GSE21329 sample 2842   | 18/251  | $2.50 \times 10^{-12}$ | $7.64 \times 10^{-12}$ |
| pioglitazone DB01132 rat GSE20219 sample 2794   | 17/308  | $6.28 \times 10^{-10}$ | $1.62 \times 10^{-9}$  |
| pioglitazone DB01132 human GSE8157 sample 2796  | 14/269  | $4.58 \times 10^{-8}$  | $1.02 \times 10^{-7}$  |
| pioglitazone DB01132 rat GSE20219 sample 2795   | 12/270  | $2.29 \times 10^{-6}$  | $4.52 \times 10^{-6}$  |
| pioglitazone DB01132 rat GSE21329 sample 2843   | 7/200   | $1.29 \times 10^{-3}$  | $2.14 \times 10^{-3}$  |
| decitabine DB01262 human GSE29077 sample 2540   | 44/300  | $6.35 \times 10^{-43}$ | $5.21 \times 10^{-41}$ |
| decitabine DB01262 human GSE29077 sample 2539   | 41/321  | $2.15 \times 10^{-37}$ | $7.19 \times 10^{-36}$ |
| decitabine 451668 mouse GSE4768 sample 3108     | 35/226  | $6.98 \times 10^{-35}$ | $1.91 \times 10^{-33}$ |
| decitabine DB01262 human GSE29077 sample 2538   | 37/337  | $3.06 \times 10^{-31}$ | $5.22 \times 10^{-30}$ |
| decitabine DB01262 human GSE9118 sample 2703    | 29/329  | $8.47 \times 10^{-22}$ | $5.54 \times 10^{-21}$ |
| decitabine DB01262 human GSE29077 sample 2548   | 25/284  | $7.22 \times 10^{-19}$ | $3.62 \times 10^{-18}$ |
| decitabine DB01262 human GSE29077 sample 2547   | 21/296  | $4.08 \times 10^{-14}$ | $1.42 \times 10^{-13}$ |
| decitabine 451668 mouse GSE4768 sample 3105     | 20/313  | $1.20 \times 10^{-12}$ | $3.76 \times 10^{-12}$ |
| decitabine 451668 mouse GSE4768 sample 3103     | 16/349  | $2.85 \times 10^{-8}$  | $6.43 \times 10^{-8}$  |
| decitabine DB01262 human GSE29077 sample 2546   | 14/357  | $1.42 \times 10^{-6}$  | $2.85 \times 10^{-6}$  |
| trogliatrazone DB00197 rat GSE21329 sample 2832 | 37/355  | $2.09 \times 10^{-30}$ | $3.31 \times 10^{-29}$ |
| trogliatrazone 5591 mouse GSE1458 sample 2589   | 17/295  | $3.24 \times 10^{-10}$ | $8.55 \times 10^{-10}$ |
| trogliatrazone DB00197 rat GSE21329 sample 2834 | 16/402  | $1.98 \times 10^{-7}$  | $4.20 \times 10^{-7}$  |
| trogliatrazone DB00197 rat GSE21329 sample 2833 | 11/192  | $5.16 \times 10^{-7}$  | $1.07 \times 10^{-6}$  |
