# Supplementary material for: A new advanced in silico drug discovery method for novel coronavirus (SARS-CoV-2) with tensor decomposition-based unsupervised feature extraction
Source: PubMed Central journal article supplement (PMC7485840; doi:10.1371/journal.pone.0238907), 2020-09-11
Supplement: pone.0238907.s032.pdf [file pone.0238907.s032.pdf]

S32 Table: The number of human proteins reported to interact with listed SARS-CoV-2 proteins [34]

|                 |                      |                 |
|-----------------|----------------------|-----------------|
| SARS-CoV2 E     | SARS-CoV2 M          | SARS-CoV2 N     |
| 859             | 1245                 | 584             |
| SARS-CoV2 nsp1  | SARS-CoV2 nsp10      | SARS-CoV2 nsp11 |
| 592             | 443                  | 925             |
| SARS-CoV2 nsp12 | SARS-CoV2 nsp13      | SARS-CoV2 nsp14 |
| 620             | 994                  | 475             |
| SARS-CoV2 nsp15 | SARS-CoV2 nsp2       | SARS-CoV2 nsp4  |
| 559             | 918                  | 952             |
| SARS-CoV2 nsp5  | SARS-CoV2 nsp5_C145A | SARS-CoV2 nsp6  |
| 540             | 365                  | 1019            |
| SARS-CoV2 nsp7  | SARS-CoV2 nsp8       | SARS-CoV2 nsp9  |
| 893             | 1017                 | 684             |
| SARS-CoV2 orf10 | SARS-CoV2 orf3a      | SARS-CoV2 orf3b |
| 872             | 974                  | 753             |
| SARS-CoV2 orf6  | SARS-CoV2 orf7a      | SARS-CoV2 orf8  |
| 779             | 971                  | 1106            |
| SARS-CoV2 orf9b | SARS-CoV2 orf9c      | SARS-CoV2 Spike |
| 732             | 1462                 | 820             |
