# Supplementary material for: A new advanced in silico drug discovery method for novel coronavirus (SARS-CoV-2) with tensor decomposition-based unsupervised feature extraction
Source: PubMed Central journal article supplement (PMC7485840; doi:10.1371/journal.pone.0238907), 2020-09-11
Supplement: pone.0238907.s033.pdf [file pone.0238907.s033.pdf]

S33 Table: Coincidence between 163 genes and human proteins whose numbers are reported in S32 Table

| SARS-CoV-2 proteins  | P values               | Odds Ratio |
|----------------------|------------------------|------------|
| SARS-CoV2 E          | $6.55 \times 10^{-27}$ | 10.16      |
| SARS-CoV2 M          | $1.38 \times 10^{-26}$ | 8.42       |
| SARS-CoV2 N          | $4.61 \times 10^{-24}$ | 11.43      |
| SARS-CoV2 nsp1       | $1.06 \times 10^{-20}$ | 10.00      |
| SARS-CoV2 nsp10      | $3.40 \times 10^{-20}$ | 11.52      |
| SARS-CoV2 nsp11      | $1.13 \times 10^{-29}$ | 10.66      |
| SARS-CoV2 nsp12      | $4.87 \times 10^{-20}$ | 9.48       |
| SARS-CoV2 nsp13      | $6.04 \times 10^{-33}$ | 11.17      |
| SARS-CoV2 nsp14      | $1.75 \times 10^{-22}$ | 12.05      |
| SARS-CoV2 nsp15      | $1.85 \times 10^{-20}$ | 10.23      |
| SARS-CoV2 nsp2       | $4.81 \times 10^{-33}$ | 11.79      |
| SARS-CoV2 nsp4       | $5.79 \times 10^{-29}$ | 10.26      |
| SARS-CoV2 nsp5       | $3.78 \times 10^{-25}$ | 12.36      |
| SARS-CoV2 nsp5_C145A | $3.75 \times 10^{-17}$ | 11.39      |
| SARS-CoV2 nsp6       | $9.47 \times 10^{-26}$ | 9.00       |
| SARS-CoV2 nsp7       | $1.93 \times 10^{-29}$ | 10.81      |
| SARS-CoV2 nsp8       | $1.11 \times 10^{-29}$ | 10.14      |
| SARS-CoV2 nsp9       | $5.54 \times 10^{-29}$ | 12.24      |
| SARS-CoV2 orf10      | $5.29 \times 10^{-34}$ | 12.37      |
| SARS-CoV2 orf3a      | $2.06 \times 10^{-28}$ | 9.95       |
| SARS-CoV2 orf3b      | $1.89 \times 10^{-29}$ | 11.80      |
| SARS-CoV2 orf6       | $8.81 \times 10^{-26}$ | 10.37      |
| SARS-CoV2 orf7a      | $1.69 \times 10^{-28}$ | 10.00      |
| SARS-CoV2 orf8       | $5.94 \times 10^{-28}$ | 9.25       |
| SARS-CoV2 orf9b      | $6.54 \times 10^{-30}$ | 12.12      |
| SARS-CoV2 orf9c      | $1.11 \times 10^{-28}$ | 8.35       |
| SARS-CoV2 Spike      | $8.22 \times 10^{-26}$ | 10.08      |
