# Supplementary material for: A new advanced in silico drug discovery method for novel coronavirus (SARS-CoV-2) with tensor decomposition-based unsupervised feature extraction
Source: PubMed Central journal article supplement (PMC7485840; doi:10.1371/journal.pone.0238907), 2020-09-11
Supplement: pone.0238907.s034.pdf [file pone.0238907.s034.pdf]

S34 Table: Number of experiments associated with adjusted  $P$ -values in various Enrichr categories for the drugs identified in another study[35]

|                    | DrugMatrix | GEO down | GEO up | LINCS down | LINCS up |
|--------------------|------------|----------|--------|------------|----------|
| Mestranol          | 6          |          |        |            |          |
| Methotrexate       | 40         | 2        |        |            |          |
| Fluorouracil       | 4          | 4        | 6      | 1          |          |
| Hexestrol          | 4          |          |        |            |          |
| Mercaptopurine     | 17         |          |        |            |          |
| Paroxetine         | 10         |          |        | 1          |          |
| Vinblastine        | 17         |          |        | 1          | 3        |
| Phenylbutazone     | 6          |          |        |            |          |
| Naloxone           | 5          |          |        |            |          |
| Hydralazine        | 14         |          |        |            |          |
| Vinorelbine        | 13         |          |        |            | 1        |
| Carvedilol         | 20         |          |        |            | 1        |
| Colchicine         | 13         |          | 1      |            |          |
| Amitriptyline      | 13         |          |        | 1          |          |
| Epinephrine        | 17         |          |        |            |          |
| Dactinomycin       | 6          | 2        | 1      | 5          | 1        |
| Hydrocortisone     | 21         |          |        |            |          |
| Melatonin          | 7          |          |        |            |          |
| Methyltestosterone | 6          |          |        |            |          |
| Omeprazole         | 20         |          |        |            |          |
| Testosterone       | 12         |          | 1      |            |          |
| Oxymetholone       | 5          |          |        |            |          |
| Progesterone       | 20         | 2        | 2      |            |          |
| Permethrin         |            | 1        |        |            |          |
| Mesalazine         |            | 1        |        |            |          |
| Menadione          |            | 1        | 1      |            | 3        |
| Stanolone          |            | 1        | 2      |            |          |
| Methotrexate       |            |          | 1      |            |          |
| Sirolimus          |            |          |        | 47         | 50       |
| Cladribine         |            |          |        | 2          | 1        |
| Regorafenib        |            |          |        | 9          | 14       |
| Temsirolimus       |            |          |        | 1          |          |
| Quinacrine         |            |          |        | 1          | 3        |
