# Supplementary material for: A new advanced in silico drug discovery method for novel coronavirus (SARS-CoV-2) with tensor decomposition-based unsupervised feature extraction
Source: PLoS One. 2020 Sep 11;15(9):e0238907. doi: 10.1371/journal.pone.0238907 (PMC7485840; doi:10.1371/journal.pone.0238907)
Supplement: S1 File — Full list of various enrichment analyses available in supplementary tables. (XLSX) [file pone.0238907.s035.xlsx]

## Sheet: DrugMatrix
Term	Overlap	P-value	Adjusted P-value	Old P-value	Old Adjusted P-value	Odds Ratio	Combined Score	Genes
2-Amino-4-Nitrophenol-625 mg/kg in CMC-Rat-Kidney-1d-up	26/300	2.01437e-19	1.58651e-15	0	0	10.6339	457.779	ITGB1;RPL10;YBX1;LDHA;TUBA1B;RPS19;FTH1;CFL1;PSMD3;SPP1;SLC38A2;HSPA8;NQO1;GPX2;NPM1;RPL23;RPS6;RPS3A;NAP1L1;ATP1B1;LCN2;TXNIP;RPS20;VIM;P4HB;TPT1
Allyl Alcohol-32 mg/kg in Saline-Rat-Liver-1d-up	25/291	1.30137e-18	5.1248e-15	0	0	10.5412	434.119	RPL10;YBX1;IFIT2;C3;LDHA;TUBA1B;RPS19;FTH1;CFL1;PGK1;SPP1;TGM2;HSPA8;NQO1;NPM1;STAT1;RPL23;RPS6;RPS3A;EEF2;LCN2;RPS20;VIM;P4HB;CALM2
Meloxicam-33 mg/kg in Corn Oil-Rat-Kidney-5d-up	23/261	1.95649e-17	5.13643e-14	0	0	10.8126	415.991	HSPA8;JUN;NPM1;RPL10;RPL23;IGFBP3;RPS6;RPS3A;NAP1L1;YBX1;ATP1B1;CTGF;VEGFA;LDHA;RPS19;FTH1;LCN2;SPP1;TXNIP;RPS20;VIM;TPT1;TGM2
Lipopolysaccharide E. Coli O55:B5-1.25 mg/kg in Saline-Rat-Kidney-1d-up	24/295	2.35854e-17	4.64396e-14	0	0	9.98232	382.182	HSPA8;TRAM1;GPX2;NPM1;RPL10;STAT1;RPL23;RPS6;EEF2;IFIT2;C3;LDHA;RPS19;PLAU;FTH1;CFL1;PGK1;LCN2;SPP1;TXNIP;RPS20;P4HB;TPT1;TGM2
44'-Methylenedianiline-81 mg/kg in Corn Oil-Rat-Liver-3d-up	25/333	3.27316e-17	5.15588e-14	0	0	9.21167	349.658	ITGB1;RPL10;YBX1;C3;TUBA1B;RPS19;FTH1;CFL1;PGK1;SLC38A2;TGM2;HSPA8;NQO1;GPX2;NPM1;RPS6;RPS3A;EEF2;PSAT1;LCN2;RPS20;VIM;P4HB;CALM2;TPT1
Gentamicin-40 mg/kg in Saline-Rat-Kidney-14d-up	24/309	6.82637e-17	8.96075e-14	0	0	9.53005	354.738	ITGB1;HSPA8;GPX2;NPM1;RPL10;STAT1;RPL23;RPS6;RPS3A;ATP1B1;CTGF;LDHA;TUBA1B;RPS19;PLAU;FTH1;LCN2;SPP1;TXNIP;RPS20;VIM;P4HB;CALM2;TPT1
Lead(IV) Acetate-600 mg/kg in Saline-Rat-Kidney-5d-up	24/309	6.82637e-17	7.68064e-14	0	0	9.53005	354.738	ITGB1;HSPA8;NQO1;GPX2;NPM1;ANXA2;RPL10;RPL23;RPS6;RPS3A;NAP1L1;YBX1;ATP1B1;LDHA;TUBA1B;RPS19;CFL1;LCN2;SPP1;TXNIP;RPS20;VIM;CALM2;TPT1
Dibromochloromethane-325 mg/kg in CMC-Rat-Kidney-3d-up	24/312	8.51148e-17	8.37955e-14	0	0	9.43841	349.245	NQO1;TRAM1;GPX2;NPM1;RPL10;RPL23;IGFBP3;RPS6;ASNS;RPS3A;NAP1L1;ATP1B1;LDHA;TUBA1B;RPS19;PLAU;FTH1;PSMD3;PGK1;LCN2;SPP1;TXNIP;RPS20;TPT1
Allopurinol-175 mg/kg in Corn Oil-Rat-Kidney-3d-up	24/329	2.84361e-16	2.48847e-13	0	0	8.95072	320.402	HSPA8;GPX2;NPM1;RPL10;RPL23;RPS6;PLOD2;RPS3A;YBX1;EEF2;LDHA;TUBA1B;RPS19;FTH1;CFL1;PSMD3;LCN2;SPP1;TXNIP;RPS20;VIM;CALM2;TPT1;TGM2
Benzyl Acetate-1868 mg/kg in CMC-Rat-Kidney-3d-up	24/330	3.04593e-16	2.39897e-13	0	0	8.92359	318.818	ITGB1;HSPA8;NQO1;GPX2;NPM1;RPL10;RPL23;RPS6;RPS3A;NAP1L1;CTGF;LDHA;TUBA1B;RPS19;PSAT1;FTH1;PSMD3;LCN2;SPP1;TXNIP;RPS20;TPT1;TGM2;RAI14
Allopurinol-175 mg/kg in Corn Oil-Rat-Kidney-1d-up	24/337	4.89577e-16	3.50537e-13	0	0	8.73824	308.049	ITGB1;HSPA8;NQO1;GPX2;RPL10;RPL23;RPS6;RPS3A;NAP1L1;YBX1;LDHA;TUBA1B;RPS19;FTH1;CFL1;PGK1;LCN2;SPP1;TXNIP;RPS20;VIM;P4HB;SLC38A2;CALM2
Cisplatin-2 mg/kg in Saline-Rat-Kidney-3d-up	24/337	4.89577e-16	3.21326e-13	0	0	8.73824	308.049	NQO1;GPX2;NPM1;RPL23;IGFBP3;RPS6;RPS3A;ATP1B1;VEGFA;LDHA;TUBA1B;RPS19;FTH1;CFL1;PSMD3;PGK1;LCN2;SPP1;TXNIP;RPS20;VIM;SLC38A2;CALM2;TPT1
Mianserin-116 mg/kg in Corn Oil-Rat-Heart-1d-up	23/303	5.24325e-16	3.1766e-13	0	0	9.31381	327.701	HSPA8;JUN;NPM1;RPL10;RPS6;RPS3A;YBX1;ATP1B1;CTGF;LDHA;H1F0;TUBA1B;RPS19;FTH1;CFL1;PGK1;TXNIP;RPS20;VIM;P4HB;CALM2;TPT1;TGM2
Dobutamine-43 mg/kg in Saline-Rat-Heart-5d-up	23/304	5.63395e-16	3.1695e-13	0	0	9.28318	325.956	ITGB1;ABCC3;HSPA8;NPM1;RPL10;RPL23;TPM1;RPS6;PLOD2;RPS3A;YBX1;ATP1B1;EEF2;CTGF;LDHA;TUBA1B;RPS19;PGK1;SPP1;VIM;P4HB;TPT1;TGM2
4-Nitrobenzoic Acid-1470 mg/kg in CMC-Rat-Kidney-1d-up	23/310	8.62315e-16	4.52773e-13	0	0	9.1035	315.772	ITGB1;HSPA8;JUN;NPM1;RPL10;RPL23;IGFBP3;RPS6;RPS3A;NAP1L1;YBX1;ATP1B1;CTGF;VEGFA;RPS19;PLAU;PSAT1;PGK1;SPP1;TXNIP;RPS20;SLC38A2;CALM2
Hydrocortisone-56 mg/kg in Corn Oil-Rat-Heart-3d-dn	22/279	1.07078e-15	5.2709e-13	0	0	9.67522	333.509	HSPA8;NPM1;RPL10;RPL23;IGFBP3;TPM1;RPS6;RPS3A;YBX1;ATP1B1;VEGFA;TUBA1B;RPS19;FTH1;CFL1;TXNIP;RPS20;VIM;P4HB;SLC38A2;CALM2;TPT1
Mesna-755 mg/kg in Saline-Rat-Kidney-5d-up	22/281	1.24368e-15	5.76191e-13	0	0	9.60636	329.697	ITGB1;HSPA8;JUN;NPM1;RPL10;RPL23;ATP1B1;CTGF;VEGFA;H1F0;RPS19;PSAT1;FTH1;CFL1;PGK1;SPP1;TXNIP;RPS20;VIM;P4HB;SLC38A2;TGM2
Diflunisal-207 mg/kg in Corn Oil-Rat-Kidney-1d-up	23/321	1.83739e-15	8.03962e-13	0	0	8.79154	298.301	HSPA8;JUN;GPX2;NPM1;RPL10;RPL23;RPS6;RPS3A;ATP1B1;CTGF;LDHA;TUBA1B;RPS19;PSAT1;LCN2;SPP1;TXNIP;RPS20;VIM;CALM2;TPT1;TGM2;RAI14
Leflunomide-60 mg/kg in Corn Oil-Rat-Spleen-5d-up	23/321	1.83739e-15	7.61648e-13	0	0	8.79154	298.301	ITGB1;NPM1;RPL10;STAT1;RPL23;IGFBP3;RPS3A;YBX1;ATP1B1;CTGF;VEGFA;LDHA;TUBA1B;CFL1;PGK1;TXNIP;RPS20;VIM;P4HB;SLC38A2;CALM2;TPT1;TGM2
Norepinephrine-1.75 mg/kg in Saline-Rat-Heart-1d-up	22/290	2.40376e-15	9.46599e-13	0	0	9.30823	313.331	ITGB1;HSPA8;NPM1;RPL10;RPL23;RPS6;PLOD2;RPS3A;CTGF;LDHA;RPS19;FTH1;CFL1;PGK1;LCN2;RPS20;VIM;P4HB;SLC38A2;CALM2;TPT1;TGM2
Vancomycin-160 mg/kg in Saline-Rat-Kidney-5d-up	22/290	2.40376e-15	9.01523e-13	0	0	9.30823	313.331	HSPA8;JUN;GPX2;NPM1;RPL10;RPL23;RPS6;RPS3A;NAP1L1;ATP1B1;LDHA;H1F0;TUBA1B;RPS19;FTH1;LCN2;SPP1;TXNIP;VIM;P4HB;CALM2;TPT1
Ibuprofen-263 mg/kg in Corn Oil-Rat-Kidney-3d-up	22/292	2.77405e-15	9.9311e-13	0	0	9.24447	309.861	HSPA8;GPX2;NPM1;RPL10;RPL23;RPS6;PLOD2;RPS3A;NAP1L1;ATP1B1;CTGF;VEGFA;LDHA;TUBA1B;RPS19;FTH1;LCN2;SPP1;TXNIP;RPS20;VIM;TGM2
Cisplatin-0.5 mg/kg in Saline-Rat-Kidney-28d-up	23/330	3.33873e-15	1.1433e-12	0	0	8.55178	285.058	ITGB1;GPX2;NPM1;RPL10;RPL23;RPS6;RPS3A;YBX1;LDHA;TUBA1B;RPS19;PLAU;CFL1;PGK1;LCN2;SPP1;TXNIP;RPS20;VIM;P4HB;SLC38A2;CALM2;TGM2
Nimodipine-1100 mg/kg in Corn Oil-Rat-Heart-3d-up	22/300	4.86679e-15	1.59712e-12	0	0	8.99796	296.54	HSPA8;NPM1;ANXA2;RPL10;RPL23;TPM1;RPS6;RPS3A;YBX1;CTGF;TUBA1B;RPS19;FTH1;CFL1;SPP1;TXNIP;RPS20;VIM;P4HB;TPT1;TGM2;RAI14
Terbutaline-130 mg/kg in Corn Oil-Rat-Heart-1d-up	22/301	5.21478e-15	1.64286e-12	0	0	8.96806	294.935	ITGB1;NPM1;RPL10;RPL23;RPS6;PLOD2;RPS3A;ATP1B1;LDHA;TUBA1B;RPS19;FTH1;CFL1;LCN2;SPP1;TXNIP;RPS20;VIM;P4HB;CALM2;TPT1;TGM2
Isoprenaline-4.2 mg/kg in Saline-Rat-Heart-5d-up	22/304	6.40528e-15	1.94031e-12	0	0	8.87956	290.199	ITGB1;HSPA8;NPM1;RPL10;RPL23;RPS6;PLOD2;ATP1B1;CTGF;LOXL2;LDHA;TUBA1B;RPS19;FTH1;CFL1;SPP1;RPS20;VIM;P4HB;CALM2;TGM2;RAI14
Netilmicin-40 mg/kg in Saline-Rat-Kidney-14d-up	23/341	6.758e-15	1.97133e-12	0	0	8.27591	270.027	HSPA8;GPX2;RPL10;RPL23;RPS6;PLOD2;RPS3A;ATP1B1;LDHA;RPS19;PLAU;CFL1;PGK1;LCN2;SPP1;TXNIP;RPS20;VIM;P4HB;SLC38A2;CALM2;TPT1;TGM2
Lacidipine-14 mg/kg in Corn Oil-Rat-Heart-1d-up	22/305	6.85618e-15	1.92855e-12	0	0	8.85045	288.645	ITGB1;HSPA8;NPM1;RPL10;RPL23;TPM1;RPS6;PLOD2;RPS3A;YBX1;CTGF;LOXL2;LDHA;TUBA1B;RPS19;FTH1;CFL1;TXNIP;VIM;P4HB;TGM2;RAI14
Cholecalciferol-8 mg/kg in CMC-Rat-Kidney-5d-up	22/307	7.84946e-15	2.13181e-12	0	0	8.79279	285.575	HSPA8;JUN;GPX2;NPM1;RPL10;RPL23;RPS6;NAP1L1;LDHA;TUBA1B;RPS19;PLAU;PSAT1;CFL1;LCN2;SPP1;TXNIP;RPS20;VIM;P4HB;TPT1;TGM2
2-Amino-4-Nitrophenol-625 mg/kg in CMC-Rat-Kidney-3d-up	22/309	8.97763e-15	2.35693e-12	0	0	8.73588	282.554	ITGB1;HSPA8;GPX2;NPM1;RPL10;RPL23;RPS6;RPS3A;NAP1L1;LDHA;TUBA1B;RPS19;FTH1;CFL1;LCN2;SPP1;RPS20;VIM;P4HB;TPT1;TGM2;RAI14
Vinblastine-0.3 mg/kg in Saline-Rat-Liver-3d-up	22/310	9.59756e-15	2.4384e-12	0	0	8.7077	281.061	HSPA8;JUN;NPM1;RPL10;RPL23;RPS6;RPS3A;ATP1B1;C3;H1F0;TUBA1B;RPS19;FTH1;CFL1;PGK1;LCN2;RPS20;VIM;P4HB;SLC38A2;CALM2;TPT1
Lead(IV) Acetate-600 mg/kg in Saline-Rat-Kidney-3d-up	23/347	9.82015e-15	2.41698e-12	0	0	8.13281	262.318	ITGB1;HSPA8;NQO1;GPX2;NPM1;ANXA2;RPL10;RPL23;RPS6;RPS3A;NAP1L1;YBX1;ATP1B1;LDHA;TUBA1B;RPS19;FTH1;LCN2;SPP1;TXNIP;RPS20;CALM2;TPT1
Vinblastine-0.3 mg/kg in Saline-Rat-Liver-5d-up	22/311	1.02578e-14	2.44819e-12	0	0	8.6797	279.58	ITGB1;HSPA8;NQO1;TRAM1;NPM1;RPL10;RPL23;RPS6;RPS3A;YBX1;C3;TUBA1B;RPS19;CFL1;PGK1;LCN2;RPS20;VIM;P4HB;CALM2;TPT1;TGM2
3-Acetamidophenol-700 mg/kg in Corn Oil-Rat-Liver-3d-up	22/316	1.42541e-14	3.30192e-12	0	0	8.54236	272.345	HSPA8;NQO1;JUN;TRAM1;RPL10;RPS3A;ATP1B1;EEF2;VEGFA;FADS2;LDHA;TUBA1B;RPS19;FTH1;FASN;CFL1;PSMD3;PGK1;RPS20;P4HB;SLC38A2;CALM2
Nimesulide-162 mg/kg in Corn Oil-Rat-Liver-1d-up	21/281	1.45826e-14	3.2815e-12	0	0	9.16971	292.137	ABCC3;HSPA8;NQO1;TRAM1;NPM1;RPL23;ASNS;RPS3A;EEF2;C3;TUBA1B;RPS19;PLAU;PSAT1;FTH1;CFL1;LCN2;RPS20;P4HB;TPT1;RAI14
2-Amino-4-Nitrophenol-625 mg/kg in CMC-Rat-Kidney-5d-up	22/317	1.52127e-14	3.3282e-12	0	0	8.51541	270.932	ITGB1;HSPA8;NQO1;GPX2;NPM1;RPL10;RPL23;RPS6;RPS3A;NAP1L1;YBX1;LDHA;RPS19;PLAU;CFL1;LCN2;SPP1;VIM;P4HB;SLC38A2;CALM2;TPT1
Dichlorvos-17 mg/kg in Water-Rat-Heart-5d-dn	22/317	1.52127e-14	3.23825e-12	0	0	8.51541	270.932	HSPA8;NPM1;RPL10;RPL23;TPM1;RPS6;RPS3A;YBX1;ATP1B1;CTGF;LDHA;H1F0;TUBA1B;RPS19;FTH1;CFL1;PGK1;RPS20;SLC38A2;CALM2;TPT1;TGM2
Ampiroxicam-94 mg/kg in CMC-Rat-Kidney-3d-up	21/286	2.06894e-14	4.28814e-12	0	0	9.0094	283.878	JUN;NPM1;RPL10;RPL23;IGFBP3;RPS6;RPS3A;YBX1;ATP1B1;CTGF;VEGFA;LDHA;PLAU;PGK1;SPP1;TXNIP;RPS20;VIM;P4HB;SLC38A2;TPT1
Ethylene Glycol-352 mg/kg in Water-Rat-Kidney-3d-dn	18/191	2.26246e-14	4.56901e-12	0	0	11.5633	363.316	JUN;RPL10;RPL23;RPS6;YBX1;EEF2;CTGF;VEGFA;RPS19;FTH1;CFL1;PGK1;SPP1;TXNIP;VIM;SLC38A2;TPT1;TGM2
Isoprenaline-4.2 mg/kg in Saline-Rat-Heart-3d-up	22/325	2.53936e-14	5e-12	0	0	8.3058	260.007	ITGB1;HSPA8;NPM1;RPL10;RPL23;RPS6;PLOD2;RPS3A;ATP1B1;CTGF;LOXL2;LDHA;TUBA1B;RPS19;FTH1;CFL1;SPP1;RPS20;VIM;P4HB;CALM2;TGM2
Bacitracin-380 mg/kg in Corn Oil-Rat-Kidney-5d-up	21/292	3.11954e-14	5.99257e-12	0	0	8.82427	274.422	HSPA8;GPX2;RPL10;RPL23;RPS6;RPS3A;NAP1L1;EEF2;LDHA;TUBA1B;RPS19;FTH1;CFL1;PSMD3;LCN2;SPP1;TXNIP;VIM;CALM2;TPT1;TGM2
Sulindac-132 mg/kg in Corn Oil-Rat-Heart-3d-up	22/334	4.44288e-14	8.33145e-12	0	0	8.082	248.48	ITGB1;HSPA8;NQO1;JUN;NPM1;RPL10;RPL23;RPS6;RPS3A;YBX1;ATP1B1;IFIT2;ICAM1;LDHA;RPS19;CFL1;LCN2;SPP1;TXNIP;VIM;P4HB;TGM2
D-Tubocurarine Chloride-0.0033 mg/kg in Saline-Rat-Heart-3d-up	22/335	4.72272e-14	8.65027e-12	0	0	8.05787	247.246	TRAM1;NPM1;RPL10;RPL23;RPS6;RPS3A;YBX1;CTGF;VEGFA;LDHA;TUBA1B;RPS19;FTH1;CFL1;TXNIP;RPS20;VIM;P4HB;SLC38A2;CALM2;TPT1;TGM2
Galantamine-110 mg/kg in CMC-Rat-Heart-5d-up	21/299	4.97669e-14	8.90827e-12	0	0	8.61768	263.972	ITGB1;HSPA8;NPM1;ANXA2;RPL10;TPM1;RPS6;RPS3A;YBX1;ATP1B1;CTGF;TUBA1B;RPS19;FTH1;FASN;CFL1;TXNIP;VIM;P4HB;CALM2;TPT1
Promazine-100 mg/kg in Corn Oil-Rat-Liver-0.25d-up	23/375	5.11717e-14	8.95619e-12	0	0	7.52556	230.309	HSPA8;NQO1;RPL10;RPL23;RPS6;ASNS;RPS3A;YBX1;ATP1B1;C3;FADS2;LDHA;TUBA1B;RPS19;PSAT1;FTH1;FASN;CFL1;PGK1;RPS20;P4HB;CALM2;TPT1
Allyl Alcohol-32 mg/kg in Saline-Rat-Liver-3d-up	21/301	5.67415e-14	9.71513e-12	0	0	8.56042	261.095	HSPA8;NQO1;JUN;NPM1;RPL23;RPS6;RPS3A;YBX1;C3;FADS2;TUBA1B;RPS19;FTH1;CFL1;PGK1;LCN2;RPS20;VIM;P4HB;CALM2;TGM2
Quetiapine-150 uM in DMSO-Rat-Primary rat hepatocytes-0.67d-up	21/304	6.89499e-14	1.15542e-11	0	0	8.47594	256.867	ITGB1;HSPA8;NPM1;ANXA2;RPL10;RPL23;RPS6;ASNS;RPS3A;NAP1L1;YBX1;SLC7A5;LDHA;TUBA1B;PSAT1;FTH1;CFL1;PGK1;LCN2;P4HB;TPT1
Allopurinol-175 mg/kg in Corn Oil-Rat-Kidney-5d-up	21/305	7.35414e-14	1.20669e-11	0	0	8.44815	255.48	HSPA8;JUN;GPX2;NPM1;RPL10;RPL23;RPS6;PLOD2;RPS3A;ATP1B1;EEF2;LDHA;TUBA1B;RPS19;CFL1;PSMD3;LCN2;SPP1;RPS20;VIM;TGM2
Tacrolimus-134 mg/kg in CMC-Rat-Heart-5d-up	21/306	7.84197e-14	1.26048e-11	0	0	8.42055	254.104	ITGB1;NPM1;RPL10;STAT1;RPL23;IGFBP3;RPS6;RPS3A;YBX1;IFIT2;VEGFA;AKAP12;RPS19;FTH1;CFL1;PGK1;RPS20;VIM;SLC38A2;CALM2;TPT1
Chloramphenicol-1500 mg/kg in CMC-Rat-Kidney-1d-dn	21/308	8.91046e-14	1.40358e-11	0	0	8.36587	251.386	ITGB1;TRAM1;NPM1;RPL10;IGFBP3;RPS3A;YBX1;ATP1B1;CTGF;LDHA;H1F0;TUBA1B;PLAU;FTH1;CFL1;PGK1;SPP1;P4HB;SLC38A2;CALM2;TPT1
Idarubicin-4 mg/kg in Saline-Rat-Kidney-5d-up	21/311	1.07731e-13	1.66371e-11	0	0	8.28517	247.388	ITGB1;GPX2;RPL10;RPL23;YBX1;VEGFA;LDHA;TUBA1B;PLAU;PSAT1;FTH1;CFL1;PGK1;SPP1;TXNIP;RPS20;P4HB;SLC38A2;CALM2;TPT1;TGM2
Tobramycin-40 mg/kg in Saline-Rat-Kidney-28d-up	21/311	1.07731e-13	1.63171e-11	0	0	8.28517	247.388	ITGB1;TRAM1;GPX2;NPM1;RPL10;RPL23;RPS3A;YBX1;LDHA;TUBA1B;RPS19;PLAU;CFL1;LCN2;SPP1;RPS20;VIM;P4HB;SLC38A2;TPT1;TGM2
Calcitriol-0.04 mg/kg in CMC-Rat-Kidney-3d-up	21/312	1.14715e-13	1.70471e-11	0	0	8.25861	246.076	HSPA8;GPX2;NPM1;RPL10;RPL23;RPS6;RPS3A;NAP1L1;ATP1B1;LDHA;TUBA1B;RPS19;CFL1;LCN2;SPP1;TXNIP;RPS20;VIM;P4HB;TPT1;TGM2
Estriol-313 mg/kg in CMC-Rat-Liver-1d-up	21/312	1.14715e-13	1.67314e-11	0	0	8.25861	246.076	HSPA8;NQO1;TRAM1;NPM1;RPL10;RPS6;RPS3A;YBX1;EEF2;VEGFA;LDHA;TUBA1B;RPS19;PSAT1;FTH1;CFL1;PGK1;RPS20;CALM2;TPT1;TGM2
Daunorubicin-4 mg/kg in Saline-Rat-Kidney-5d-up	21/316	1.47142e-13	2.10707e-11	0	0	8.15407	240.932	HSPA8;GPX2;RPL23;IGFBP3;PLOD2;NAP1L1;YBX1;ATP1B1;VEGFA;LDHA;RPS19;PLAU;PSAT1;FASN;CFL1;PGK1;SPP1;RPS20;SLC38A2;TPT1;TGM2
Ranitidine-1500 mg/kg in CMC-Rat-Heart-5d-up	20/283	1.84512e-13	2.59502e-11	0	0	8.67133	254.253	ITGB1;ABCC3;HSPA8;NPM1;ANXA2;RPL10;RPL23;RPS6;PLOD2;RPS3A;ATP1B1;CTGF;TUBA1B;RPS19;FTH1;CFL1;TXNIP;P4HB;CALM2;TGM2
Thioguanine-24 mg/kg in Corn Oil-Rat-Kidney-5d-dn	20/283	1.84512e-13	2.5495e-11	0	0	8.67133	254.253	JUN;RPL10;RPL23;RPS6;RPS3A;YBX1;ATP1B1;EEF2;IFIT2;CTGF;LDHA;H1F0;TUBA1B;RPS19;FTH1;CFL1;SPP1;TXNIP;CALM2;TPT1
Ethinylestradiol-1480 mg/kg in Corn Oil-Rat-Liver-3d-up	20/284	1.97126e-13	2.67684e-11	0	0	8.6408	252.786	ABCC3;HSPA8;NQO1;TRAM1;GPX2;NPM1;RPL23;RPS6;RPS3A;EEF2;VEGFA;RPS19;PLAU;FTH1;CFL1;PSMD3;RPS20;P4HB;TGM2;RAI14
Chloroform-600 mg/kg in Corn Oil-Rat-Liver-3d-up	20/287	2.40003e-13	3.20383e-11	0	0	8.55048	248.461	ABCC3;HSPA8;NQO1;TRAM1;GPX2;RPL10;RPL23;RPS6;RPS3A;YBX1;EEF2;FADS2;RPS19;FTH1;FASN;CFL1;LCN2;RPS20;P4HB;TPT1
Bromfenac-5 mg/kg in CMC-Rat-Liver-3d-up	21/325	2.543e-13	3.33811e-11	0	0	7.92827	229.922	NQO1;TRAM1;RPL10;RPL23;RPS6;RPS3A;YBX1;EEF2;C3;FADS2;LDHA;TUBA1B;RPS19;FTH1;CFL1;LCN2;RPS20;P4HB;SLC38A2;CALM2;TPT1
Carbon Tetrachloride-3178 mg/kg in Saline-Rat-Liver-1d-up	21/326	2.69948e-13	3.48542e-11	0	0	7.90395	228.745	HSPA8;JUN;TRAM1;NPM1;RPL10;RPL23;RPS6;RPS3A;LDHA;TUBA1B;RPS19;FTH1;CFL1;PSMD3;PGK1;LCN2;SPP1;RPS20;P4HB;SLC38A2;TPT1
Lead (II) Acetate-600 mg/kg in Saline-Rat-Kidney-5d-up	21/328	3.03998e-13	3.86176e-11	0	0	7.85575	226.417	HSPA8;NQO1;GPX2;NPM1;ANXA2;RPL10;RPL23;RPS3A;NAP1L1;ATP1B1;LDHA;TUBA1B;RPS19;FTH1;CFL1;PSMD3;LCN2;SPP1;RPS20;P4HB;TPT1
Nimodipine-10 mg/kg in Corn Oil-Rat-Heart-1d-up	18/222	3.07999e-13	3.85047e-11	0	0	9.9486	286.606	HSPA8;JUN;RPL10;RPL23;IGFBP3;RPS6;RPS3A;CTGF;LDHA;TUBA1B;RPS19;FTH1;TXNIP;RPS20;VIM;TPT1;TGM2;RAI14
Mercuric Chloride-2.5 mg/kg in Water-Rat-Kidney-3d-dn	18/223	3.32727e-13	4.09463e-11	0	0	9.90399	284.556	HSPA8;JUN;RPL10;RPL23;RPS6;RPS3A;YBX1;CTGF;VEGFA;LDHA;H1F0;RPS19;CFL1;SPP1;RPS20;CALM2;TPT1;TGM2
Bromodichloromethane-430 mg/kg in CMC-Rat-Kidney-1d-up	20/296	4.27183e-13	5.17614e-11	0	0	8.2905	236.126	ITGB1;NQO1;GPX2;NPM1;RPL10;RPL23;IGFBP3;RPS6;ASNS;RPS3A;NAP1L1;ATP1B1;CTGF;RPS19;PGK1;SPP1;TXNIP;RPS20;P4HB;TPT1
44'-Methylenedianiline-81 mg/kg in Corn Oil-Rat-Liver-5d-up	21/334	4.3201e-13	5.15532e-11	0	0	7.71463	219.638	ABCC3;HSPA8;NQO1;GPX2;NPM1;RPL10;RPL23;RPS6;RPS3A;ATP1B1;TUBA1B;RPS19;CFL1;PGK1;LCN2;RPS20;VIM;P4HB;CALM2;TPT1;TGM2
Cisplatin-1.17 mg/kg in Saline-Rat-Kidney-3d-up	22/374	4.39475e-13	5.16613e-11	0	0	7.21761	205.364	GPX2;RPL10;ATP1B1;CTGF;VEGFA;LDHA;TUBA1B;RPS19;PSAT1;FTH1;CFL1;PSMD3;PGK1;LCN2;SPP1;TXNIP;RPS20;P4HB;SLC38A2;CALM2;TPT1;TGM2
Methyl Salicylate-444 mg/kg in Corn Oil-Rat-Kidney-1d-up	20/297	4.54878e-13	5.26856e-11	0	0	8.26258	234.812	ITGB1;GPX2;NPM1;RPL10;RPL23;RPS6;PLOD2;RPS3A;NAP1L1;ATP1B1;VEGFA;LDHA;H1F0;RPS19;SPP1;TXNIP;RPS20;SLC38A2;TPT1;RAI14
24-Diaminophenol-60 mg/kg in Water-Rat-Kidney-1d-up	21/336	4.84915e-13	5.53506e-11	0	0	7.66871	217.445	ITGB1;NQO1;GPX2;NPM1;RPL10;RPL23;RPS6;RPS3A;ATP1B1;LDHA;TUBA1B;PLAU;CFL1;PGK1;SPP1;TXNIP;VIM;SLC38A2;CALM2;TPT1;TGM2
Trimethadione-535 mg/kg in Water-Rat-Heart-3d-dn	20/300	5.48418e-13	6.17048e-11	0	0	8.17996	230.934	HSPA8;RPL10;RPL23;IGFBP3;TPM1;RPS6;RPS3A;YBX1;CTGF;VEGFA;LDHA;CFL1;PGK1;TXNIP;RPS20;VIM;P4HB;SLC38A2;TPT1;TGM2
Stavudine-1400 mg/kg in Water-Rat-Liver-1d-up	20/302	6.20495e-13	6.88313e-11	0	0	8.12579	228.402	HSPA8;NQO1;NPM1;RPL23;RPS6;RPS3A;LDHA;TUBA1B;RPS19;FTH1;CFL1;PSMD3;PGK1;LCN2;SPP1;RPS20;VIM;CALM2;TPT1;TGM2
Gemcitabine-11 mg/kg in Saline-Rat-Bone marrow-3d-up	21/344	7.63756e-13	8.35465e-11	0	0	7.49037	208.985	HSPA8;NPM1;RPL10;RPL23;RPS6;PLOD2;RPS3A;NAP1L1;YBX1;ATP1B1;CTGF;VEGFA;LDHA;TUBA1B;RPS19;FTH1;CFL1;SPP1;TXNIP;VIM;P4HB
Tacrolimus-50 uM in DMSO-Rat-Primary rat hepatocytes-1d-up	19/270	8.30333e-13	8.9585e-11	0	0	8.6344	240.183	HSPA8;NQO1;NPM1;RPL10;RPL23;ASNS;RPS3A;NAP1L1;YBX1;SLC7A5;LDHA;TUBA1B;PSAT1;FTH1;CFL1;PGK1;RPS20;P4HB;SLC38A2
Melphalan-12 mg/kg in CMC-Rat-Bone marrow-5d-dn	20/307	8.41468e-13	8.95595e-11	0	0	7.99345	222.247	HSPA8;TRAM1;NPM1;RPL10;RPL23;RPS6;YBX1;LDHA;TUBA1B;RPS19;FTH1;CFL1;PGK1;LCN2;RPS20;VIM;P4HB;SLC38A2;CALM2;TPT1
Streptozotocin-3000 uM in DMSO-Rat-Primary rat hepatocytes-1d-dn	24/473	8.48422e-13	8.90956e-11	0	0	6.22576	173.048	ITGB1;HSPA8;JUN;TRAM1;ANXA2;RPL10;RPL23;RPS3A;YBX1;CTGF;VEGFA;C3;LDHA;TUBA1B;RPS19;PSAT1;FTH1;CFL1;PGK1;LCN2;P4HB;CALM2;TPT1;TGM2
Cortisone-206 mg/kg in CMC-Rat-Heart-1d-dn	19/271	8.86781e-13	9.18985e-11	0	0	8.60254	238.731	ITGB1;HSPA8;NPM1;RPL10;TPM1;RPS6;RPS3A;EEF2;CTGF;LDHA;TUBA1B;CFL1;PSMD3;TXNIP;VIM;P4HB;SLC38A2;CALM2;TPT1
Phenytoin-46 mg/kg in Water-Rat-Heart-3d-up	20/308	8.93717e-13	9.14145e-11	0	0	7.96749	221.045	HSPA8;JUN;TRAM1;NPM1;RPL23;TPM1;RPS6;RPS3A;YBX1;CTGF;H1F0;RPS19;FASN;CFL1;TXNIP;VIM;P4HB;SLC38A2;CALM2;TPT1
Bromfenac-5 mg/kg in CMC-Rat-Liver-1d-up	20/309	9.48996e-13	9.58243e-11	0	0	7.94171	219.853	NQO1;NPM1;RPL10;RPL23;RPS6;RPS3A;YBX1;EEF2;C3;LDHA;TUBA1B;RPS19;PSAT1;FTH1;CFL1;PGK1;RPS20;P4HB;CALM2;TPT1
Droperidol-94 mg/kg in CMC-Rat-Heart-1d-dn	19/273	1.01061e-12	1.00754e-10	0	0	8.53952	235.865	ITGB1;TRAM1;NPM1;RPL23;IGFBP3;ATP1B1;CTGF;VEGFA;LDHA;TUBA1B;RPS19;CFL1;TXNIP;RPS20;VIM;P4HB;SLC38A2;CALM2;TGM2
Dexamethasone-1 mg/kg in Corn Oil-Rat-Heart-5d-dn	20/311	1.06931e-12	1.05273e-10	0	0	7.89064	217.498	HSPA8;RPL10;RPL23;TPM1;RPS6;RPS3A;EEF2;IFIT2;VEGFA;LDHA;TUBA1B;RPS19;FTH1;CFL1;PGK1;VIM;P4HB;SLC38A2;CALM2;TPT1
Idarubicin-4 mg/kg in Saline-Rat-Kidney-14d-up	20/314	1.27686e-12	1.24155e-10	0	0	7.81525	214.033	TRAM1;GPX2;RPL10;RPL23;RPS6;RPS3A;NAP1L1;ATP1B1;CTGF;AKAP12;LDHA;RPS19;PLAU;PSAT1;FTH1;SPP1;TXNIP;RPS20;VIM;TGM2
4-Octylphenol-700 mg/kg in Corn Oil-Rat-Kidney-3d-up	20/316	1.4356e-12	1.37888e-10	0	0	7.76578	211.769	NQO1;GPX2;NPM1;RPL10;RPS6;RPS3A;NAP1L1;YBX1;ATP1B1;LDHA;H1F0;TUBA1B;RPS19;CFL1;SPP1;TXNIP;RPS20;P4HB;TPT1;RAI14
Calcitriol-0.04 mg/kg in CMC-Rat-Kidney-5d-up	20/317	1.52174e-12	1.444e-10	0	0	7.74129	210.649	GPX2;NPM1;RPL10;RPL23;RPS6;PLOD2;RPS3A;NAP1L1;YBX1;ATP1B1;LDHA;RPS19;PSAT1;FTH1;LCN2;SPP1;TXNIP;RPS20;VIM;TPT1
Ethinylestradiol-1480 mg/kg in Corn Oil-Rat-Liver-0.25d-up	19/281	1.68648e-12	1.58127e-10	0	0	8.2964	224.902	ABCC3;HSPA8;TRAM1;NPM1;RPL10;RPL23;RPS6;AMIGO2;RPS3A;RPS19;PSAT1;FTH1;FASN;PSMD3;PGK1;TXNIP;RPS20;P4HB;RAI14
Roxarsone-11 mg/kg in Corn Oil-Rat-Kidney-1d-up	19/281	1.68648e-12	1.56267e-10	0	0	8.2964	224.902	ITGB1;HSPA8;NQO1;NPM1;RPS6;RPS3A;ATP1B1;CTGF;LDHA;H1F0;RPS19;FTH1;PGK1;SPP1;TXNIP;VIM;SLC38A2;CALM2;TPT1
Nitrendipine-1100 mg/kg in Corn Oil-Rat-Heart-1d-up	20/320	1.81012e-12	1.65774e-10	0	0	7.66871	207.344	ITGB1;HSPA8;JUN;ANXA2;RPL10;RPL23;TPM1;RPS3A;YBX1;CTGF;LDHA;TUBA1B;FTH1;CFL1;VIM;P4HB;CALM2;TPT1;TGM2;RAI14
Diphenhydramine-100 mg/kg in Water-Rat-Heart-3d-up	20/321	1.91712e-12	1.73555e-10	0	0	7.64482	206.259	ITGB1;HSPA8;TRAM1;RPL23;TPM1;RPS6;RPS3A;YBX1;ATP1B1;CTGF;VEGFA;RPS19;FTH1;FASN;CFL1;TXNIP;RPS20;VIM;CALM2;TPT1
Cisplatin-2 mg/kg in Saline-Rat-Kidney-5d-up	20/322	2.03003e-12	1.81687e-10	0	0	7.62108	205.182	GPX2;NPM1;ANXA2;RPL10;RPL23;RPS6;RPS3A;NAP1L1;YBX1;ATP1B1;LDHA;TUBA1B;RPS19;FTH1;LCN2;SPP1;TXNIP;RPS20;CALM2;TPT1
Carmofur-201 mg/kg in CMC-Rat-Bone marrow-1d-up	19/284	2.03475e-12	1.80064e-10	0	0	8.20876	220.985	HSPA8;TRAM1;NPM1;RPL10;RPL23;RPS6;AKAP12;LDHA;H1F0;TUBA1B;RPS19;FTH1;CFL1;PGK1;LCN2;SPP1;TXNIP;VIM;CALM2
Isoprenaline-4.2 mg/kg in Saline-Rat-Heart-1d-up	19/284	2.03475e-12	1.78064e-10	0	0	8.20876	220.985	ITGB1;HSPA8;NPM1;RPL10;RPL23;RPS6;PLOD2;CTGF;LDHA;TUBA1B;RPS19;FTH1;CFL1;PGK1;SPP1;RPS20;VIM;P4HB;TGM2
Sulfadiazine-1170 mg/kg in Water-Rat-Kidney-3d-dn	19/284	2.03475e-12	1.76107e-10	0	0	8.20876	220.985	HSPA8;JUN;RPL10;RPL23;RPS6;RPS3A;YBX1;EEF2;CTGF;VEGFA;AKAP12;H1F0;TUBA1B;RPS19;FTH1;CFL1;SPP1;RPS20;VIM
Buspirone-196 mg/kg in CMC-Rat-Heart-1d-dn	20/323	2.14914e-12	1.83985e-10	0	0	7.59749	204.114	ITGB1;NPM1;RPL10;IGFBP3;TPM1;RPS3A;YBX1;CTGF;LDHA;TUBA1B;RPS19;CFL1;PGK1;RPS20;VIM;P4HB;SLC38A2;CALM2;TPT1;TGM2
Azithromycin-225 mg/kg in Water-Rat-Kidney-3d-dn	19/286	2.30313e-12	1.95048e-10	0	0	8.15136	218.43	ITGB1;JUN;RPL10;CTGF;VEGFA;AKAP12;H1F0;TUBA1B;RPS19;PSAT1;FTH1;PGK1;SPP1;TXNIP;RPS20;SLC38A2;CALM2;TPT1;TGM2
Lead(IV) Acetate-600 mg/kg in Saline-Rat-Liver-3d-dn	20/325	2.40726e-12	2.01698e-10	0	0	7.55073	202.001	TRAM1;RPL23;RPS6;RPS3A;ATP1B1;EEF2;C3;FADS2;LDHA;RPS19;PLAU;FTH1;FASN;PGK1;LCN2;TXNIP;P4HB;TPT1;TGM2;RAI14
6-Methoxy-2-Naphthylacetic Acid-360 mg/kg in Saline-Rat-Kidney-3d-up	19/287	2.4494e-12	2.03068e-10	0	0	8.12296	217.169	ITGB1;TRAM1;NPM1;RPL10;RPL23;IGFBP3;RPS6;RPS3A;ATP1B1;VEGFA;LDHA;RPS19;FTH1;LCN2;SPP1;TXNIP;RPS20;CALM2;TPT1
Catechol-195 mg/kg in Saline-Rat-Liver-0.25d-up	19/290	2.94201e-12	2.41367e-10	0	0	8.03893	213.449	HSPA8;NQO1;TRAM1;NPM1;RPL10;RPL23;RPS6;RPS3A;EEF2;ICAM1;C3;LDHA;PLAU;FTH1;FASN;CFL1;PSMD3;P4HB;TPT1
Methyl Salicylate-444 mg/kg in Corn Oil-Rat-Kidney-3d-up	19/290	2.94201e-12	2.38879e-10	0	0	8.03893	213.449	HSPA8;JUN;RPS6;RPS3A;ATP1B1;EEF2;CTGF;VEGFA;LDHA;H1F0;TUBA1B;RPS19;FASN;PSMD3;SPP1;TXNIP;RPS20;SLC38A2;TPT1
Nortriptyline-63 mg/kg in Water-Rat-Heart-1d-up	19/290	2.94201e-12	2.36442e-10	0	0	8.03893	213.449	ITGB1;HSPA8;NPM1;RPL10;RPL23;TPM1;RPS6;RPS3A;YBX1;EEF2;VEGFA;LDHA;TUBA1B;CFL1;PGK1;VIM;P4HB;TPT1;TGM2
Aceclofenac-9 mg/kg in Corn Oil-Rat-Kidney-3d-up	20/329	3.013e-12	2.39701e-10	0	0	7.45893	197.871	HSPA8;TRAM1;NPM1;RPL10;RPL23;RPS3A;YBX1;EEF2;CTGF;LDHA;H1F0;RPS19;FTH1;CFL1;LCN2;SPP1;TXNIP;RPS20;VIM;SLC38A2
Bisacodyl-1750 mg/kg in CMC-Rat-Intestine-5d-up	19/291	3.1258e-12	2.46188e-10	0	0	8.0113	212.23	ITGB1;HSPA8;NQO1;TRAM1;GPX2;NPM1;RPL10;ASNS;YBX1;ATP1B1;EEF2;LDHA;TUBA1B;FTH1;CFL1;PGK1;RPS20;P4HB;TPT1
Cephalexin-2500 mg/kg in CMC-Rat-Kidney-1d-dn	19/292	3.32029e-12	2.58917e-10	0	0	7.98386	211.021	NPM1;RPL23;RPS6;PLOD2;RPS3A;YBX1;CTGF;LDHA;TUBA1B;PLAU;PSAT1;PGK1;SPP1;TXNIP;RPS20;SLC38A2;CALM2;TPT1;TGM2
Nimesulide-162 mg/kg in Corn Oil-Rat-Kidney-5d-up	19/292	3.32029e-12	2.56378e-10	0	0	7.98386	211.021	HSPA8;TRAM1;GPX2;NPM1;RPL23;RPS6;ATP1B1;LDHA;TUBA1B;RPS19;FTH1;PSMD3;PGK1;LCN2;SPP1;TXNIP;RPS20;P4HB;CALM2
Benoxaprofen-89 mg/kg in CMC-Rat-Liver-3d-up	19/293	3.52603e-12	2.69622e-10	0	0	7.95662	209.823	HSPA8;NQO1;NPM1;RPL10;RPL23;RPS6;RPS3A;NAP1L1;ICAM1;C3;FTH1;CFL1;LCN2;TXNIP;RPS20;P4HB;SLC38A2;TPT1;TGM2
Calcitriol-0.04 mg/kg in CMC-Rat-Heart-5d-up	19/293	3.52603e-12	2.67029e-10	0	0	7.95662	209.823	ITGB1;NPM1;RPL23;IGFBP3;RPS6;PLOD2;RPS3A;NAP1L1;YBX1;ATP1B1;CTGF;VEGFA;RPS19;LCN2;SPP1;TXNIP;RPS20;VIM;TPT1
Ethosuximide-1200 mg/kg in Water-Rat-Heart-5d-dn	20/332	3.55801e-12	2.66885e-10	0	0	7.39153	194.854	HSPA8;RPL10;RPL23;TPM1;RPS6;RPS3A;ATP1B1;EEF2;CTGF;VEGFA;LDHA;TUBA1B;RPS19;CFL1;PGK1;VIM;SLC38A2;CALM2;TPT1;TGM2
Lipopolysaccharide E. Coli O55:B5-1.25 mg/kg in Saline-Rat-Kidney-3d-up	19/295	3.97375e-12	2.95257e-10	0	0	7.90267	207.456	NPM1;RPL10;RPL23;RPS6;RPS3A;C3;LDHA;TUBA1B;RPS19;PLAU;CFL1;PGK1;LCN2;SPP1;RPS20;VIM;P4HB;TPT1;TGM2
Sodium Arsenite-30 mg/kg in Saline-Rat-Kidney-3d-dn	19/295	3.97375e-12	2.92498e-10	0	0	7.90267	207.456	ITGB1;NPM1;RPL10;RPL23;RPS6;PLOD2;YBX1;LDHA;H1F0;TUBA1B;PLAU;PSAT1;CFL1;PGK1;SPP1;P4HB;SLC38A2;CALM2;TGM2
Phenylhydrazine-78 mg/kg in Water-Rat-Liver-3d-up	20/335	4.19434e-12	3.05876e-10	0	0	7.32534	191.904	HSPA8;NPM1;RPL10;RPL23;RPS6;RPS3A;YBX1;ATP1B1;EEF2;ICAM1;VEGFA;C3;LDHA;RPS19;FTH1;PGK1;VIM;SLC38A2;TPT1;TGM2
Nimesulide-162 mg/kg in Corn Oil-Rat-Liver-3d-up	18/259	4.2372e-12	3.06167e-10	0	0	8.52737	223.307	ABCC3;HSPA8;NQO1;TRAM1;NPM1;RPL10;RPL23;RPS6;RPS3A;C3;RPS19;CFL1;LCN2;TXNIP;RPS20;P4HB;TGM2;RAI14
17-Methyltestosterone-2000 mg/kg in CMC-Rat-Liver-1d-up	19/297	4.47415e-12	3.20349e-10	0	0	7.84946	205.128	HSPA8;NQO1;NPM1;RPL10;RPL23;RPS6;RPS3A;EEF2;RPS19;PSAT1;FTH1;CFL1;PSMD3;PGK1;RPS20;P4HB;SLC38A2;CALM2;TPT1
Vancomycin-160 mg/kg in Saline-Rat-Kidney-3d-up	19/297	4.47415e-12	3.17463e-10	0	0	7.84946	205.128	HSPA8;GPX2;RPL10;RPL23;RPS6;YBX1;ATP1B1;VEGFA;LDHA;H1F0;TUBA1B;RPS19;PSAT1;CFL1;PGK1;SPP1;TXNIP;VIM;CALM2
Anastrozole-400 mg/kg in CMC-Rat-Liver-1d-up	19/298	4.74587e-12	3.33736e-10	0	0	7.82312	203.978	ABCC3;HSPA8;NQO1;NPM1;RPL10;RPL23;RPS3A;NAP1L1;YBX1;ICAM1;C3;TUBA1B;PSAT1;FTH1;PSMD3;PGK1;P4HB;CALM2;TPT1
Isotretinoin-125 mg/kg in Corn Oil-Rat-Liver-1d-up	19/298	4.74587e-12	3.30783e-10	0	0	7.82312	203.978	NQO1;NPM1;RPL10;RPS6;RPS3A;ICAM1;VEGFA;C3;TUBA1B;RPS19;PLAU;FTH1;FASN;CFL1;PGK1;RPS20;CALM2;TPT1;TGM2
Miconazole-920 mg/kg in Corn Oil-Rat-Liver-5d-up	19/298	4.74587e-12	3.27881e-10	0	0	7.82312	203.978	ABCC3;HSPA8;GPX2;NPM1;RPL10;RPL23;RPS6;RPS3A;NAP1L1;RPS19;FTH1;CFL1;LCN2;RPS20;VIM;P4HB;CALM2;TPT1;RAI14
Norethindrone Acetate-125 mg/kg in Corn Oil-Rat-Liver-1d-up	19/298	4.74587e-12	3.2503e-10	0	0	7.82312	203.978	HSPA8;NQO1;NPM1;RPL10;RPL23;RPS6;RPS3A;EEF2;VEGFA;TUBA1B;RPS19;PSAT1;FTH1;CFL1;PGK1;RPS20;CALM2;TPT1;TGM2
Tranexamic Acid-2000 mg/kg in CMC-Rat-Heart-5d-up	19/298	4.74587e-12	3.22228e-10	0	0	7.82312	203.978	ITGB1;ABCC3;HSPA8;NPM1;RPL23;RPS6;ATP1B1;CTGF;VEGFA;AKAP12;TUBA1B;RPS19;FTH1;CFL1;TXNIP;RPS20;P4HB;TPT1;TGM2
Rofecoxib-775 mg/kg in Corn Oil-Rat-Heart-3d-up	21/379	4.86975e-12	3.27814e-10	0	0	6.79865	177.091	ITGB1;HSPA8;NPM1;RPL10;STAT1;RPL23;TPM1;RPS6;PLOD2;RPS3A;ATP1B1;CTGF;LOXL2;LDHA;RPS19;CFL1;PSMD3;RPS20;VIM;TPT1;TGM2
Amprenavir-600 mg/kg in CMC-Rat-Kidney-5d-dn	19/299	5.03294e-12	3.35928e-10	0	0	7.79695	202.838	HSPA8;TRAM1;NPM1;RPL10;RPL23;RPS6;YBX1;LDHA;RPS19;PLAU;PSAT1;FTH1;CFL1;PGK1;SPP1;P4HB;SLC38A2;CALM2;TPT1
Mesna-755 mg/kg in Saline-Rat-Kidney-3d-up	19/299	5.03294e-12	3.33105e-10	0	0	7.79695	202.838	HSPA8;JUN;NPM1;RPL10;RPL23;RPS6;ATP1B1;CTGF;LDHA;H1F0;TUBA1B;FTH1;FASN;CFL1;PGK1;TXNIP;VIM;P4HB;CALM2
Sodium Nitroprusside-6 mg/kg in Saline-Rat-Heart-3d-dn	21/380	5.11925e-12	3.35993e-10	0	0	6.78076	176.286	ITGB1;JUN;IGFBP3;RPS6;RPS3A;YBX1;CTGF;VEGFA;LDHA;TUBA1B;RPS19;FTH1;CFL1;PGK1;RPS20;VIM;P4HB;SLC38A2;CALM2;TPT1;TGM2
Cyclosporin A-350 mg/kg in Corn Oil-Rat-Spleen-5d-up	19/300	5.33617e-12	3.47336e-10	0	0	7.77096	201.707	ITGB1;HSPA8;NPM1;RPL10;RPS3A;VEGFA;LDHA;TUBA1B;RPS19;FTH1;CFL1;PGK1;TXNIP;RPS20;VIM;P4HB;CALM2;TPT1;TGM2
Ethambutol-998 mg/kg in CMC-Rat-Kidney-3d-dn	19/301	5.6564e-12	3.65162e-10	0	0	7.74514	200.586	RPL10;RPL23;IGFBP3;RPS6;YBX1;EEF2;CTGF;LDHA;TUBA1B;RPS19;PLAU;PSAT1;FTH1;CFL1;PGK1;TXNIP;RPS20;TPT1;TGM2
Sisomicin-34 mg/kg in Saline-Rat-Kidney-5d-up	19/301	5.6564e-12	3.62194e-10	0	0	7.74514	200.586	HSPA8;JUN;TRAM1;NPM1;RPL23;RPS6;CTGF;LDHA;H1F0;TUBA1B;RPS19;FTH1;PGK1;SPP1;TXNIP;RPS20;P4HB;SLC38A2;TGM2
Stavudine-1120 uM in DMSO-Rat-Primary rat hepatocytes-0.67d-up	19/301	5.6564e-12	3.59273e-10	0	0	7.74514	200.586	ITGB1;HSPA8;NQO1;JUN;NPM1;RPL10;TXNRD1;RPS6;YBX1;CTGF;LDHA;TUBA1B;FTH1;CFL1;PSMD3;LCN2;P4HB;SLC38A2;CALM2
Phenobarbital-54 mg/kg in Water-Rat-Liver-5d-dn	19/302	5.99451e-12	3.77702e-10	0	0	7.7195	199.473	HSPA8;TRAM1;NPM1;RPL10;RPS6;RPS3A;ICAM1;VEGFA;C3;LDHA;FTH1;FASN;PGK1;TXNIP;RPS20;P4HB;SLC38A2;CALM2;TPT1
4-Nitrobenzoic Acid-1470 mg/kg in CMC-Rat-Kidney-5d-up	19/303	6.35141e-12	3.97014e-10	0	0	7.69402	198.37	ITGB1;HSPA8;JUN;NPM1;RPL10;RPL23;RPS6;RPS3A;NAP1L1;YBX1;CTGF;VEGFA;LDHA;RPS19;SPP1;TXNIP;RPS20;SLC38A2;TPT1
Amiodarone-147 mg/kg in CMC-Rat-Kidney-5d-up	19/303	6.35141e-12	3.93888e-10	0	0	7.69402	198.37	NPM1;RPL10;RPL23;IGFBP3;RPS6;RPS3A;EEF2;LDHA;RPS19;PLAU;PSAT1;FTH1;PGK1;SPP1;TXNIP;RPS20;P4HB;SLC38A2;TPT1
Bezafibrate-617 mg/kg in Corn Oil-Rat-Kidney-3d-up	19/303	6.35141e-12	3.9081e-10	0	0	7.69402	198.37	HSPA8;GPX2;NPM1;RPL10;RPL23;RPS6;RPS3A;ATP1B1;EEF2;VEGFA;LDHA;RPS19;PSAT1;FASN;PSMD3;SPP1;TXNIP;RPS20;TPT1
Cadmium Chloride-66 mg/kg in Corn Oil-Rat-Kidney-3d-up	19/303	6.35141e-12	3.87781e-10	0	0	7.69402	198.37	ITGB1;RPL10;RPL23;RPS6;RPS3A;YBX1;CTGF;VEGFA;LDHA;H1F0;RPS19;FTH1;CFL1;SPP1;TXNIP;VIM;SLC38A2;CALM2;TPT1
Lead(IV) Acetate-200 mg/kg in Saline-Rat-Liver-0.25d-up	19/303	6.35141e-12	3.84798e-10	0	0	7.69402	198.37	HSPA8;NQO1;RPL10;RPL23;RPS6;RPS3A;YBX1;ICAM1;VEGFA;C3;FADS2;LDHA;PLAU;FTH1;CFL1;PSMD3;PGK1;RPS20;P4HB
Megestrol Acetate-132 mg/kg in CMC-Rat-Liver-5d-dn	19/303	6.35141e-12	3.81861e-10	0	0	7.69402	198.37	HSPA8;JUN;TRAM1;RPL23;RPS6;RPS3A;YBX1;ICAM1;VEGFA;C3;LDHA;RPS19;FTH1;FASN;PGK1;TXNIP;RPS20;SLC38A2;TPT1
Bacitracin-380 mg/kg in Corn Oil-Rat-Kidney-3d-up	19/304	6.72809e-12	4.01443e-10	0	0	7.66871	197.276	HSPA8;GPX2;NPM1;ANXA2;RPL10;RPL23;RPS6;RPS3A;NAP1L1;YBX1;LDHA;TUBA1B;RPS19;CFL1;LCN2;SPP1;TXNIP;RPS20;VIM
Fluconazole-394 mg/kg in Corn Oil-Rat-Liver-5d-up	19/304	6.72809e-12	3.98424e-10	0	0	7.66871	197.276	ABCC3;HSPA8;NQO1;TRAM1;NPM1;RPL10;RPL23;RPS6;RPS3A;ICAM1;RPS19;PLAU;PSAT1;CFL1;PGK1;RPS20;P4HB;CALM2;TPT1
Indomethacin-12 mg/kg in Water-Rat-Liver-5d-up	20/344	6.80218e-12	3.99805e-10	0	0	7.13369	183.434	NQO1;TRAM1;NPM1;RPL10;RPL23;RPS6;RPS3A;ATP1B1;ICAM1;VEGFA;C3;RPS19;FTH1;LCN2;TXNIP;RPS20;VIM;P4HB;SLC38A2;TGM2
Catechol-40 mg/kg in Saline-Rat-Liver-0.25d-up	19/305	7.12554e-12	4.15709e-10	0	0	7.64357	196.19	HSPA8;NQO1;TRAM1;NPM1;RPL10;RPL23;RPS3A;EEF2;ICAM1;VEGFA;C3;FADS2;LDHA;PLAU;FTH1;CFL1;PSMD3;PGK1;P4HB
Diethylstilbestrol-280 mg/kg in Corn Oil-Rat-Kidney-3d-up	19/306	7.54484e-12	4.36935e-10	0	0	7.61859	195.113	HSPA8;NQO1;GPX2;NPM1;RPL10;RPL23;RPS6;RPS3A;LDHA;RPS19;FTH1;PSMD3;LCN2;SPP1;TXNIP;RPS20;P4HB;TPT1;RAI14
Pyrilamine-688 mg/kg in Water-Rat-Heart-3d-dn	19/306	7.54484e-12	4.33746e-10	0	0	7.61859	195.113	ITGB1;RPL10;RPL23;TPM1;RPS6;RPS3A;YBX1;CTGF;VEGFA;RPS19;FTH1;CFL1;PGK1;RPS20;VIM;SLC38A2;CALM2;TPT1;TGM2
Levofloxacin-739 mg/kg in Water-Rat-Kidney-3d-dn	16/199	7.75254e-12	4.42456e-10	0	0	9.86528	252.383	HSPA8;RPL10;RPL23;RPS6;RPS3A;YBX1;ATP1B1;EEF2;VEGFA;LDHA;H1F0;RPS19;FTH1;PGK1;SPP1;TGM2
Cyclosporin A-70 mg/kg in Corn Oil-Rat-Spleen-0.25d-up	20/347	7.96573e-12	4.51353e-10	0	0	7.07201	180.731	HSPA8;NPM1;RPL10;RPL23;IGFBP3;RPS6;NAP1L1;YBX1;EEF2;VEGFA;LDHA;TUBA1B;CFL1;PGK1;TXNIP;RPS20;VIM;P4HB;CALM2;TPT1
Fluocinolone Acetonide-2.5 mg/kg in Corn Oil-Rat-Liver-3d-up	20/347	7.96573e-12	4.48129e-10	0	0	7.07201	180.731	HSPA8;NQO1;JUN;RPL10;RPL23;RPS6;RPS3A;YBX1;ATP1B1;VEGFA;C3;FADS2;LDHA;RPS19;FTH1;FASN;TXNIP;SLC38A2;CALM2;TPT1
Aminoglutethimide-350 mg/kg in CMC-Rat-Liver-1d-up	19/307	7.98708e-12	4.46144e-10	0	0	7.59377	194.045	ABCC3;HSPA8;NQO1;GPX2;NPM1;RPL10;STAT1;RPL23;ASNS;EEF2;ICAM1;TUBA1B;PSAT1;CFL1;PSMD3;PGK1;P4HB;SLC38A2;TPT1
Thioacetamide-200 mg/kg in Saline-Rat-Liver-1d-up	19/307	7.98708e-12	4.43002e-10	0	0	7.59377	194.045	HSPA8;NPM1;RPL10;RPL23;RPS6;RPS3A;LDHA;TUBA1B;RPS19;FTH1;CFL1;PGK1;LCN2;SPP1;RPS20;P4HB;SLC38A2;TPT1;TGM2
Carvedilol-2000 mg/kg in Corn Oil-Rat-Liver-5d-up	19/308	8.45344e-12	4.65589e-10	0	0	7.56912	192.986	ABCC3;HSPA8;NQO1;GPX2;NPM1;RPL10;RPL23;RPS6;ATP1B1;RPS19;FTH1;CFL1;PSMD3;LCN2;RPS20;VIM;SLC38A2;TPT1;TGM2
Doxazosin-5 mg/kg in Water-Rat-Heart-0.25d-up	19/309	8.94512e-12	4.89248e-10	0	0	7.54462	191.935	ITGB1;ANXA2;RPL10;TPM1;RPS6;RPS3A;YBX1;CTGF;LDHA;TUBA1B;RPS19;FTH1;CFL1;PSMD3;PGK1;P4HB;CALM2;TPT1;TGM2
Ticrynafen-570 mg/kg in CMC-Rat-Liver-1d-up	19/309	8.94512e-12	4.85874e-10	0	0	7.54462	191.935	ABCC3;NQO1;NPM1;RPL10;RPL23;RPS6;RPS3A;YBX1;EEF2;LDHA;TUBA1B;PSAT1;FTH1;CFL1;PGK1;RPS20;P4HB;CALM2;TPT1
Cisplatin-0.5 mg/kg in Saline-Rat-Kidney-14d-up	19/311	1.00096e-11	5.39969e-10	0	0	7.4961	189.857	ITGB1;GPX2;NPM1;RPL10;RPS6;RPS3A;EEF2;LDHA;TUBA1B;RPS19;PLAU;FTH1;PGK1;LCN2;SPP1;TXNIP;RPS20;CALM2;TPT1
Gentamicin-267 mg/kg in Corn Oil-Rat-Kidney-5d-up	19/311	1.00096e-11	5.36296e-10	0	0	7.4961	189.857	HSPA8;JUN;NPM1;RPL10;RPL23;RPS6;RPS3A;LDHA;H1F0;TUBA1B;RPS19;PSMD3;PGK1;LCN2;SPP1;VIM;P4HB;SLC38A2;CALM2
Moxonidine-17 mg/kg in CMC-Rat-Heart-3d-up	18/273	1.02368e-11	5.44764e-10	0	0	8.09007	204.719	HSPA8;JUN;NPM1;ANXA2;RPL10;RPL23;TPM1;RPS6;RPS3A;YBX1;EEF2;CTGF;VEGFA;RPS19;PSMD3;TXNIP;RPS20;RAI14
1-Naphthyl Isothiocyanate-60 mg/kg in Corn Oil-Rat-Liver-3d-up	19/312	1.05851e-11	5.59519e-10	0	0	7.47208	188.831	ITGB1;ABCC3;HSPA8;NQO1;GPX2;NPM1;RPL10;RPL23;RPS6;RPS3A;ATP1B1;RPS19;FTH1;LCN2;RPS20;VIM;SLC38A2;CALM2;RAI14
Zomepirac-2.8 mg/kg in Saline-Rat-Kidney-0.25d-dn	19/312	1.05851e-11	5.55789e-10	0	0	7.47208	188.831	JUN;RPL10;RPL23;RPS6;PLOD2;ATP1B1;CTGF;H1F0;TUBA1B;RPS19;PSAT1;FTH1;PGK1;SPP1;TXNIP;RPS20;P4HB;CALM2;TPT1
Sulindac-132 mg/kg in Corn Oil-Rat-Liver-3d-up	18/274	1.08808e-11	5.6753e-10	0	0	8.06054	203.481	HSPA8;NQO1;NPM1;RPL23;RPS3A;ICAM1;C3;RPS19;PLAU;CFL1;PSMD3;LCN2;RPS20;P4HB;SLC38A2;TPT1;TGM2;RAI14
Clopidogrel-400 mg/kg in Corn Oil-Rat-Bone marrow-5d-dn	19/314	1.183e-11	6.12979e-10	0	0	7.42449	186.803	HSPA8;TRAM1;NPM1;RPL10;RPL23;ASNS;LDHA;TUBA1B;RPS19;FTH1;CFL1;PSMD3;PGK1;LCN2;RPS20;VIM;P4HB;CALM2;TPT1
Methapyrilene-100 mg/kg in CMC-Rat-Liver-1d-up	19/314	1.183e-11	6.08973e-10	0	0	7.42449	186.803	ABCC3;HSPA8;NQO1;NPM1;RPL10;RPL23;RPS6;RPS3A;YBX1;LDHA;RPS19;FTH1;CFL1;PSMD3;PGK1;RPS20;P4HB;CALM2;TPT1
Sulfinpyrazone-269 mg/kg in CMC-Rat-Kidney-3d-up	19/315	1.25024e-11	6.39409e-10	0	0	7.40092	185.801	HSPA8;TRAM1;NPM1;RPL10;RPL23;RPS6;ATP1B1;CTGF;VEGFA;LDHA;H1F0;TUBA1B;RPS19;PSAT1;CFL1;SPP1;SLC38A2;CALM2;TPT1
Fluocinolone Acetonide-2.5 mg/kg in Corn Oil-Rat-Kidney-1d-up	19/316	1.32104e-11	6.71259e-10	0	0	7.37749	184.806	ITGB1;RPL23;IGFBP3;PLOD2;RPS3A;ATP1B1;IFIT2;CTGF;VEGFA;LDHA;PSAT1;FTH1;PGK1;SPP1;TXNIP;RPS20;ITGAV;SLC38A2;TPT1
Nimesulide-162 mg/kg in Corn Oil-Rat-Kidney-3d-up	18/278	1.38528e-11	6.99388e-10	0	0	7.94456	198.634	HSPA8;NQO1;GPX2;NPM1;RPL10;RPL23;RPS3A;ATP1B1;VEGFA;AKAP12;LDHA;LCN2;SPP1;TXNIP;RPS20;VIM;P4HB;SLC38A2
Clemastine-5.4 mg/kg in CMC-Rat-Heart-5d-up	19/319	1.55653e-11	7.80845e-10	0	0	7.30811	181.87	HSPA8;NPM1;ANXA2;RPL23;IGFBP3;TPM1;RPS6;RPS3A;YBX1;CTGF;VEGFA;RPS19;FTH1;CFL1;TXNIP;RPS20;VIM;CALM2;TPT1
Diphenhydramine-10.9 mg/kg in Water-Rat-Heart-3d-up	20/362	1.71409e-11	8.54442e-10	0	0	6.77897	168.048	HSPA8;JUN;NPM1;TPM1;RPS6;RPS3A;YBX1;ATP1B1;CTGF;VEGFA;TUBA1B;RPS19;CFL1;PSMD3;TXNIP;RPS20;VIM;CALM2;TPT1;TGM2
Acrolein-20 mg/kg in Water-Rat-Heart-3d-dn	19/321	1.73469e-11	8.59273e-10	0	0	7.26258	179.949	RPL10;RPL23;TPM1;RPS6;RPS3A;YBX1;ATP1B1;EEF2;CTGF;LDHA;H1F0;TUBA1B;CFL1;PGK1;VIM;P4HB;SLC38A2;CALM2;TPT1
Artemisinin-2000 mg/kg in CMC-Rat-Liver-1d-up	19/321	1.73469e-11	8.53903e-10	0	0	7.26258	179.949	ABCC3;HSPA8;NQO1;NPM1;RPL10;RPS6;RPS3A;YBX1;EEF2;LDHA;TUBA1B;RPS19;PSAT1;FTH1;CFL1;PGK1;P4HB;CALM2;TPT1
Beta-Estradiol-150 mg/kg in Corn Oil-Rat-Liver-5d-up	19/322	1.83074e-11	8.95585e-10	0	0	7.24003	179	ITGB1;HSPA8;NQO1;NPM1;RPL10;RPL23;RPS6;RPS3A;VEGFA;RPS19;PLAU;CFL1;PSMD3;PGK1;RPS20;P4HB;SLC38A2;TPT1;TGM2
Candesartan-1300 mg/kg in CMC-Rat-Kidney-5d-up	19/322	1.83074e-11	8.90057e-10	0	0	7.24003	179	ITGB1;HSPA8;GPX2;NPM1;RPL10;RPL23;RPS6;CTGF;VEGFA;LDHA;RPS19;CFL1;LCN2;SPP1;TXNIP;SLC38A2;CALM2;TPT1;TGM2
Chloroform-600 mg/kg in Corn Oil-Rat-Liver-5d-up	18/283	1.863e-11	9.00184e-10	0	0	7.8042	192.813	ABCC3;NQO1;TRAM1;NPM1;RPL10;RPL23;RPS6;RPS3A;YBX1;EEF2;FADS2;RPS19;FTH1;CFL1;LCN2;RPS20;P4HB;TPT1
Losartan-1000 mg/kg in Water-Rat-Kidney-1d-up	21/407	1.86621e-11	8.96238e-10	0	0	6.33093	156.403	ITGB1;HSPA8;TRAM1;GPX2;NPM1;RPL23;IGFBP3;RPS3A;ATP1B1;EEF2;LDHA;RPS19;PLAU;PSAT1;FTH1;CFL1;SPP1;P4HB;SLC38A2;TPT1;TGM2
Carbon Tetrachloride-1175 mg/kg in Corn Oil-Rat-Liver-1d-up	18/284	1.9753e-11	9.42877e-10	0	0	7.77672	191.678	HSPA8;TRAM1;NPM1;RPL10;RPL23;RPS6;RPS3A;LDHA;RPS19;FTH1;CFL1;LCN2;SPP1;RPS20;VIM;P4HB;TPT1;RAI14
L-Phenylephrine-0.44 mg/kg in Saline-Rat-Heart-5d-dn	18/284	1.9753e-11	9.37197e-10	0	0	7.77672	191.678	HSPA8;JUN;RPL10;RPL23;TPM1;RPS6;RPS3A;YBX1;EEF2;CTGF;LDHA;TUBA1B;CFL1;TXNIP;VIM;SLC38A2;TPT1;TGM2
Theophylline-225 mg/kg in Water-Rat-Heart-1d-up	18/284	1.9753e-11	9.31586e-10	0	0	7.77672	191.678	ITGB1;HSPA8;NPM1;RPS6;PLOD2;RPS3A;LDHA;RPS19;CFL1;LCN2;SPP1;TXNIP;RPS20;VIM;P4HB;CALM2;TPT1;TGM2
Auranofin-33 mg/kg in CMC-Rat-Kidney-1d-dn	19/324	2.0379e-11	9.55388e-10	0	0	7.19533	177.124	NPM1;RPL10;RPL23;RPS6;CTGF;LDHA;H1F0;RPS19;PLAU;PSAT1;FTH1;CFL1;SPP1;TXNIP;RPS20;VIM;SLC38A2;CALM2;TGM2
Diazepam-710 mg/kg in CMC-Rat-Kidney-3d-dn	18/286	2.21904e-11	1.03415e-09	0	0	7.72234	189.439	ITGB1;RPL10;RPL23;IGFBP3;RPS6;EEF2;CTGF;LDHA;H1F0;TUBA1B;RPS19;PSAT1;RPS20;VIM;SLC38A2;CALM2;TPT1;TGM2
Probenecid-600 mg/kg in Corn Oil-Rat-Kidney-3d-up	19/326	2.26676e-11	1.05018e-09	0	0	7.15119	175.276	HSPA8;JUN;NPM1;RPL10;RPL23;IGFBP3;RPS6;RPS3A;YBX1;EEF2;VEGFA;RPS19;FTH1;CFL1;PGK1;SPP1;TXNIP;P4HB;CALM2
Geraniol-1500 mg/kg in CMC-Rat-Liver-1d-up	18/287	2.35114e-11	1.0829e-09	0	0	7.69543	188.334	HSPA8;NQO1;NPM1;RPL10;RPL23;RPS6;ASNS;RPS3A;YBX1;EEF2;ICAM1;FADS2;LDHA;RPS19;PSAT1;FTH1;RPS20;SLC38A2
Indinavir-1000 mg/kg in CMC-Rat-Kidney-3d-dn	18/288	2.49052e-11	1.14043e-09	0	0	7.66871	187.239	ITGB1;NPM1;RPL10;RPL23;RPS6;YBX1;ATP1B1;EEF2;LDHA;RPS19;PLAU;PSAT1;PGK1;SPP1;P4HB;SLC38A2;CALM2;TPT1
Troglitazone-1200 mg/kg in Corn Oil-Rat-Liver-5d-dn	19/328	2.51941e-11	1.14699e-09	0	0	7.10759	173.456	HSPA8;NQO1;TRAM1;RPL10;RPL23;RPS6;RPS3A;EEF2;ICAM1;LDHA;TUBA1B;RPS19;PLAU;FTH1;PSMD3;PGK1;RPS20;P4HB;TPT1
Cadmium Chloride-2 mg/kg in Saline-Rat-Kidney-28d-up	18/289	2.63756e-11	1.19387e-09	0	0	7.64218	186.153	ITGB1;NPM1;RPL10;RPL23;PLOD2;RPS3A;VEGFA;LDHA;TUBA1B;RPS19;PLAU;FTH1;SPP1;TXNIP;RPS20;P4HB;SLC38A2;CALM2
Leucovorin-1500 mg/kg in CMC-Rat-Bone marrow-1d-up	18/289	2.63756e-11	1.18705e-09	0	0	7.64218	186.153	HSPA8;TRAM1;NPM1;RPL10;RPL23;ASNS;AKAP12;LDHA;TUBA1B;FTH1;CFL1;LCN2;TXNIP;VIM;P4HB;SLC38A2;CALM2;TPT1
Lead(IV) Acetate-600 mg/kg in Saline-Rat-Kidney-1d-up	20/371	2.66725e-11	1.19359e-09	0	0	6.61452	161.046	HSPA8;NQO1;GPX2;NPM1;RPL23;RPS6;RPS3A;NAP1L1;YBX1;ATP1B1;LDHA;TUBA1B;RPS19;PSAT1;FTH1;SPP1;RPS20;P4HB;CALM2;TPT1
Mitomycin C-1.7 mg/kg in Saline-Rat-Bone marrow-1d-dn	18/290	2.79264e-11	1.24264e-09	0	0	7.61582	185.076	NPM1;RPL10;RPL23;RPS6;RPS3A;NAP1L1;YBX1;EEF2;LDHA;TUBA1B;RPS19;FTH1;CFL1;PGK1;RPS20;VIM;CALM2;TPT1
Nystatin-134 mg/kg in Corn Oil-Rat-Liver-5d-up	18/290	2.79264e-11	1.23566e-09	0	0	7.61582	185.076	NQO1;TRAM1;RPL23;RPS3A;YBX1;ATP1B1;ICAM1;C3;LDHA;RPS19;FASN;CFL1;LCN2;P4HB;SLC38A2;CALM2;TPT1;TGM2
Sodium Arsenite-10 mg/kg in Saline-Rat-Liver-0.25d-up	18/290	2.79264e-11	1.22876e-09	0	0	7.61582	185.076	HSPA8;NQO1;JUN;TRAM1;RPL23;RPS3A;ATP1B1;ICAM1;VEGFA;LDHA;RPS19;PLAU;FTH1;PGK1;RPS20;SLC38A2;CALM2;RAI14
Sparteine-225 mg/kg in Water-Rat-Heart-3d-dn	18/290	2.79264e-11	1.22193e-09	0	0	7.61582	185.076	ITGB1;NPM1;RPL10;RPL23;CTGF;VEGFA;LDHA;TUBA1B;RPS19;FTH1;CFL1;PGK1;VIM;P4HB;SLC38A2;CALM2;TPT1;TGM2
Trichloroethane-3000 mg/kg in Water-Rat-Liver-5d-dn	18/290	2.79264e-11	1.21518e-09	0	0	7.61582	185.076	HSPA8;TRAM1;NPM1;RPL10;RPL23;IGFBP3;ICAM1;VEGFA;LDHA;TUBA1B;RPS19;FTH1;PSMD3;TXNIP;P4HB;SLC38A2;TPT1;RAI14
Acarbose-2000 mg/kg in Water-Rat-Kidney-3d-dn	18/291	2.95616e-11	1.27927e-09	0	0	7.58965	184.008	RPL10;RPS6;PLOD2;RPS3A;YBX1;ATP1B1;EEF2;H1F0;RPS19;PLAU;PSAT1;FTH1;CFL1;PGK1;SPP1;TXNIP;P4HB;TGM2
Beta-Estradiol 3-Benzoate-25 mg/kg in Corn Oil-Rat-Liver-5d-up	18/291	2.95616e-11	1.27228e-09	0	0	7.58965	184.008	NQO1;TRAM1;NPM1;RPL10;RPL23;RPS6;RPS3A;EEF2;VEGFA;RPS19;FTH1;CFL1;RPS20;P4HB;SLC38A2;CALM2;TPT1;TGM2
Imatinib-150 mg/kg in Water-Rat-Liver-5d-up	18/291	2.95616e-11	1.26537e-09	0	0	7.58965	184.008	ITGB1;NQO1;JUN;TRAM1;STAT1;ATP1B1;ICAM1;C3;FADS2;LDHA;TUBA1B;FTH1;FASN;CFL1;PGK1;P4HB;SLC38A2;TPT1
Salicylamide-1300 mg/kg in CMC-Rat-Kidney-1d-dn	18/291	2.95616e-11	1.25853e-09	0	0	7.58965	184.008	RPL10;RPL23;RPS6;PLOD2;YBX1;ATP1B1;EEF2;CTGF;LDHA;H1F0;TUBA1B;RPS19;FTH1;SPP1;RPS20;VIM;CALM2;TGM2
Timolol-900 mg/kg in Water-Rat-Heart-5d-dn	18/291	2.95616e-11	1.25176e-09	0	0	7.58965	184.008	JUN;RPL23;TPM1;YBX1;EEF2;CTGF;LDHA;H1F0;TUBA1B;RPS19;FTH1;CFL1;PGK1;TXNIP;VIM;CALM2;TPT1;TGM2
Azauridine-1500 mg/kg in CMC-Rat-Bone marrow-1d-up	18/292	3.12855e-11	1.31767e-09	0	0	7.56366	182.949	HSPA8;TRAM1;NPM1;RPL10;RPL23;YBX1;LDHA;TUBA1B;RPS19;FTH1;CFL1;PGK1;LCN2;TXNIP;RPS20;VIM;P4HB;SLC38A2
Cholecalciferol-8 mg/kg in CMC-Rat-Heart-5d-up	18/292	3.12855e-11	1.31066e-09	0	0	7.56366	182.949	ITGB1;HSPA8;JUN;NPM1;RPL10;RPL23;NAP1L1;YBX1;LOXL2;RPS19;CFL1;LCN2;SPP1;TXNIP;RPS20;VIM;P4HB;SLC38A2
Pravastatin-1200 mg/kg in Corn Oil-Rat-Liver-3d-up	18/292	3.12855e-11	1.30373e-09	0	0	7.56366	182.949	ITGB1;HSPA8;NPM1;RPL10;RPS6;RPS3A;YBX1;ATP1B1;EEF2;TUBA1B;RPS19;FASN;CFL1;TXNIP;RPS20;SLC38A2;CALM2;TPT1
Sulpiride-1000 mg/kg in CMC-Rat-Heart-5d-up	18/292	3.12855e-11	1.29687e-09	0	0	7.56366	182.949	ITGB1;HSPA8;JUN;NPM1;ANXA2;RPS6;RPS3A;YBX1;ATP1B1;CTGF;TUBA1B;CFL1;TXNIP;VIM;P4HB;CALM2;TPT1;TGM2
Irinotecan-5 mg/kg in Saline-Rat-Kidney-1d-dn	19/333	3.27055e-11	1.34863e-09	0	0	7.00087	169.025	JUN;RPL10;RPL23;IGFBP3;RPS6;RPS3A;YBX1;ATP1B1;H1F0;RPS19;FTH1;FASN;PGK1;TXNIP;RPS20;VIM;CALM2;TPT1;TGM2
Sulfadimethoxine-1100 mg/kg in CMC-Rat-Kidney-1d-dn	18/293	3.31025e-11	1.35789e-09	0	0	7.53785	181.899	HSPA8;NPM1;RPL23;RPS6;YBX1;ATP1B1;EEF2;PSAT1;FTH1;CFL1;PSMD3;PGK1;SPP1;TXNIP;P4HB;SLC38A2;TPT1;TGM2
Tolazamide-1500 mg/kg in CMC-Rat-Kidney-3d-dn	18/293	3.31025e-11	1.35086e-09	0	0	7.53785	181.899	RPL10;RPL23;RPS6;ATP1B1;EEF2;LDHA;H1F0;TUBA1B;RPS19;FTH1;CFL1;PGK1;SPP1;VIM;SLC38A2;CALM2;TPT1;TGM2
Trichloroethylene-1230 mg/kg in CMC-Rat-Kidney-3d-dn	18/293	3.31025e-11	1.34389e-09	0	0	7.53785	181.899	JUN;RPS6;CTGF;AKAP12;LDHA;H1F0;TUBA1B;PSAT1;CFL1;PGK1;TXNIP;RPS20;VIM;P4HB;SLC38A2;CALM2;TPT1;TGM2
Atorvastatin-300 mg/kg in Corn Oil-Rat-Kidney-1d-dn	18/294	3.50173e-11	1.41434e-09	0	0	7.51221	180.858	NPM1;RPS6;RPS3A;YBX1;EEF2;CTGF;LDHA;TUBA1B;RPS19;PSAT1;CFL1;PGK1;SPP1;TXNIP;SLC38A2;CALM2;TPT1;TGM2
Clobetasol Propionate-17 mg/kg in Corn Oil-Rat-Bone marrow-3d-dn	18/294	3.50173e-11	1.40712e-09	0	0	7.51221	180.858	HSPA8;TRAM1;NPM1;RPL10;RPL23;RPS6;RPS3A;NAP1L1;AKAP12;LDHA;RPS19;FTH1;CFL1;PSMD3;RPS20;P4HB;CALM2;RAI14
Ibuprofen-54 mg/kg in Corn Oil-Rat-Kidney-1d-up	18/294	3.50173e-11	1.39998e-09	0	0	7.51221	180.858	ITGB1;RPL23;IGFBP3;RPS3A;ATP1B1;VEGFA;LDHA;RPS19;PSAT1;FTH1;CFL1;PGK1;SPP1;TXNIP;P4HB;SLC38A2;TPT1;TGM2
Tetracycline-1500 mg/kg in Water-Rat-Liver-1d-dn	18/294	3.50173e-11	1.39291e-09	0	0	7.51221	180.858	NQO1;TRAM1;NPM1;RPL23;RPS3A;YBX1;ICAM1;C3;LDHA;RPS19;PLAU;FTH1;TXNIP;RPS20;SLC38A2;CALM2;TPT1;RAI14
Betahistine-1500 mg/kg in Water-Rat-Kidney-3d-dn	17/256	3.54503e-11	1.40305e-09	0	0	8.14801	196.065	ITGB1;JUN;RPL10;RPL23;RPS6;CTGF;AKAP12;H1F0;TUBA1B;PSAT1;CFL1;PGK1;SPP1;TXNIP;SLC38A2;TPT1;TGM2
Torsemide-110 mg/kg in Corn Oil-Rat-Liver-3d-dn	18/295	3.70346e-11	1.45842e-09	0	0	7.48674	179.825	ITGB1;RPL10;RPL23;RPS3A;YBX1;EEF2;ICAM1;VEGFA;C3;LDHA;RPS19;FTH1;CFL1;PGK1;RPS20;P4HB;CALM2;TPT1
1-Naphthyl Isothiocyanate-166.67 uM in DMSO-Rat-Primary rat hepatocytes-0.67d-up	18/296	3.91595e-11	1.53443e-09	0	0	7.46145	178.802	ITGB1;HSPA8;NQO1;NPM1;RPL10;RPL23;RPS6;ASNS;RPS3A;CTGF;LDHA;H1F0;TUBA1B;CFL1;PSMD3;LCN2;P4HB;SLC38A2
Buflomedil-615 mg/kg in CMC-Rat-Heart-5d-up	18/297	4.13973e-11	1.61408e-09	0	0	7.43633	177.786	ITGB1;HSPA8;JUN;NPM1;TPM1;RPS6;YBX1;ATP1B1;CTGF;VEGFA;TUBA1B;CFL1;PGK1;TXNIP;P4HB;SLC38A2;CALM2;TPT1
Irinotecan-5 mg/kg in Saline-Rat-Bone marrow-5d-up	18/297	4.13973e-11	1.60613e-09	0	0	7.43633	177.786	HSPA8;TRAM1;NPM1;RPL10;RPL23;RPS6;EEF2;LDHA;TUBA1B;RPS19;FTH1;CFL1;PGK1;TXNIP;RPS20;P4HB;CALM2;TPT1
Tacrine-24 mg/kg in Water-Rat-Heart-3d-dn	16/223	4.34142e-11	1.67613e-09	0	0	8.80354	210.055	RPL10;RPL23;IGFBP3;TPM1;RPS6;YBX1;EEF2;CTGF;VEGFA;TUBA1B;RPS19;CFL1;PGK1;VIM;SLC38A2;TGM2
Bezafibrate-617 mg/kg in Corn Oil-Rat-Liver-0.25d-up	18/298	4.37535e-11	1.68099e-09	0	0	7.41137	176.779	HSPA8;NPM1;RPL10;RPL23;RPS6;RPS3A;ATP1B1;EEF2;FADS2;LDHA;RPS19;PLAU;FTH1;FASN;LCN2;TXNIP;SLC38A2;TPT1
Carmustine-4 mg/kg in Corn Oil-Rat-Bone marrow-3d-dn	18/298	4.37535e-11	1.67283e-09	0	0	7.41137	176.779	HSPA8;TRAM1;NPM1;RPL10;RPL23;RPS6;RPS3A;EEF2;LDHA;RPS19;FTH1;CFL1;PGK1;LCN2;TXNIP;RPS20;VIM;CALM2
Cimetidine-100 mg/kg in CMC-Rat-Heart-5d-up	18/298	4.37535e-11	1.66475e-09	0	0	7.41137	176.779	ITGB1;HSPA8;JUN;NPM1;ANXA2;RPL10;TPM1;RPS6;RPS3A;YBX1;CTGF;VEGFA;TUBA1B;CFL1;TXNIP;VIM;SLC38A2;TPT1
Clozapine-69 uM in DMSO-Rat-Primary rat hepatocytes-0.67d-up	18/298	4.37535e-11	1.65674e-09	0	0	7.41137	176.779	ITGB1;HSPA8;NPM1;ANXA2;RPL10;RPL23;RPS6;ASNS;RPS3A;YBX1;SLC7A5;LDHA;RPS19;PSAT1;LCN2;RPS20;P4HB;RAI14
Digoxin-0.26 mg/kg in Corn Oil-Rat-Liver-1d-up	18/299	4.62339e-11	1.74229e-09	0	0	7.38659	175.781	HSPA8;TRAM1;RPL10;RPL23;IGFBP3;EEF2;ICAM1;VEGFA;FADS2;LDHA;TUBA1B;RPS19;PLAU;FTH1;FASN;PSMD3;PGK1;RPS20
Amikacin-82 mg/kg in Saline-Rat-Kidney-1d-up	19/340	4.67709e-11	1.75413e-09	0	0	6.85673	163.093	JUN;RPL10;RPL23;RPS6;RPS3A;YBX1;ATP1B1;EEF2;CTGF;LDHA;H1F0;PSAT1;FTH1;CFL1;PGK1;SPP1;P4HB;CALM2;TPT1
Chloroform-600 mg/kg in Corn Oil-Rat-Liver-1d-up	18/300	4.88444e-11	1.82322e-09	0	0	7.36196	174.791	HSPA8;NQO1;NPM1;RPL10;RPL23;RPS6;RPS3A;NAP1L1;EEF2;LDHA;RPS19;FTH1;CFL1;PSMD3;LCN2;RPS20;P4HB;TPT1
Doxorubicin-4 mg/kg in Saline-Rat-Kidney-5d-up	18/300	4.88444e-11	1.81462e-09	0	0	7.36196	174.791	HSPA8;YBX1;ATP1B1;LOXL2;VEGFA;LDHA;RPS19;PLAU;PSAT1;FTH1;CFL1;PGK1;SPP1;TXNIP;RPS20;P4HB;CALM2;TGM2
Methylparaben-1500 mg/kg in CMC-Rat-Liver-1d-up	18/300	4.88444e-11	1.8061e-09	0	0	7.36196	174.791	HSPA8;NQO1;TRAM1;RPL10;RPL23;RPS6;RPS3A;YBX1;C3;LDHA;RPS19;PSAT1;FTH1;FASN;PGK1;P4HB;CALM2;TPT1
Mosapride-30 mg/kg in CMC-Rat-Intestine-5d-up	18/300	4.88444e-11	1.79766e-09	0	0	7.36196	174.791	ITGB1;NQO1;GPX2;NPM1;RPL10;RPL23;IGFBP3;YBX1;ATP1B1;EEF2;LDHA;H1F0;RPS19;CFL1;PGK1;RPS20;P4HB;TPT1
Isoniazid-50 mg/kg in Saline-Rat-Liver-1d-dn	17/262	5.1055e-11	1.87027e-09	0	0	7.96141	188.67	HSPA8;NQO1;TRAM1;NPM1;RPL23;RPS6;RPS3A;YBX1;EEF2;C3;FADS2;RPS19;FASN;RPS20;VIM;SLC38A2;TPT1
Rapamycin-20 uM in DMSO-Rat-Primary rat hepatocytes-0.67d-up	18/301	5.15914e-11	1.88117e-09	0	0	7.3375	173.808	ITGB1;HSPA8;TRAM1;NPM1;RPL10;ASNS;NAP1L1;YBX1;EEF2;LDHA;H1F0;TUBA1B;RPS19;FTH1;LCN2;RPS20;P4HB;SLC38A2
Doxepin-147 mg/kg in CMC-Rat-Heart-3d-dn	19/343	5.43771e-11	1.97361e-09	0	0	6.79676	160.642	NPM1;RPL10;RPL23;IGFBP3;RPS6;YBX1;EEF2;CTGF;LDHA;TUBA1B;RPS19;FTH1;CFL1;PGK1;RPS20;P4HB;SLC38A2;CALM2;TGM2
Betamethasone-79 mg/kg in Corn Oil-Rat-Bone marrow-3d-dn	18/302	5.44814e-11	1.96833e-09	0	0	7.31321	172.834	HSPA8;TRAM1;NPM1;RPL10;RPL23;RPS6;RPS3A;AKAP12;LDHA;TUBA1B;RPS19;CFL1;PGK1;LCN2;VIM;P4HB;CALM2;RAI14
Busulfan-3 mg/kg in Corn Oil-Rat-Bone marrow-3d-dn	18/303	5.75212e-11	2.06866e-09	0	0	7.28907	171.868	HSPA8;TRAM1;NPM1;RPL10;RPL23;RPS6;LDHA;H1F0;RPS19;FTH1;CFL1;PGK1;LCN2;TXNIP;VIM;P4HB;SLC38A2;CALM2
Mercuric Chloride-2.5 mg/kg in Water-Rat-Kidney-1d-up	20/388	5.94662e-11	2.12889e-09	0	0	6.32471	148.919	ITGB1;NQO1;JUN;GPX2;RPS3A;YBX1;ATP1B1;CTGF;LDHA;TUBA1B;PLAU;PSAT1;FTH1;CFL1;PGK1;TXNIP;SLC38A2;CALM2;TPT1;TGM2
Aminosalicylic Acid-2337 mg/kg in CMC-Rat-Liver-1d-up	18/304	6.0718e-11	2.16387e-09	0	0	7.2651	170.91	HSPA8;NQO1;NPM1;RPL10;RPL23;RPS6;RPS3A;YBX1;LDHA;TUBA1B;RPS19;FTH1;CFL1;PSMD3;PGK1;RPS20;P4HB;TPT1
Azathioprine-0.5 uM in DMSO-Rat-Primary rat hepatocytes-0.67d-up	18/304	6.0718e-11	2.15412e-09	0	0	7.2651	170.91	ITGB1;HSPA8;GPX2;NPM1;ANXA2;RPL10;RPL23;RPS3A;NAP1L1;YBX1;EEF2;TUBA1B;RPS19;CFL1;PSMD3;LCN2;TPT1;RAI14
Cyclosporin A-350 mg/kg in Corn Oil-Rat-Kidney-5d-up	18/304	6.0718e-11	2.14446e-09	0	0	7.2651	170.91	HSPA8;TRAM1;NPM1;RPL10;RPL23;RPS6;RPS3A;NAP1L1;ATP1B1;LDHA;RPS19;PSAT1;FTH1;SPP1;TXNIP;RPS20;VIM;TPT1
Pioglitazone-300 mg/kg in Corn Oil-Rat-Liver-1d-dn	18/304	6.0718e-11	2.13489e-09	0	0	7.2651	170.91	NQO1;TRAM1;RPL10;RPL23;RPS6;RPS3A;VEGFA;LDHA;TUBA1B;RPS19;PLAU;FTH1;FASN;PGK1;RPS20;P4HB;CALM2;TPT1
Rofecoxib-3 mg/kg in Corn Oil-Rat-Kidney-3d-up	18/304	6.0718e-11	2.1254e-09	0	0	7.2651	170.91	HSPA8;NQO1;JUN;GPX2;NPM1;RPL10;RPL23;RPS3A;CTGF;VEGFA;LDHA;H1F0;PSMD3;LCN2;SPP1;TXNIP;RPS20;TPT1
Sulconazole-1200 mg/kg in Corn Oil-Rat-Liver-3d-dn	18/304	6.0718e-11	2.116e-09	0	0	7.2651	170.91	TRAM1;NPM1;RPL10;RPL23;RPS6;RPS3A;ICAM1;VEGFA;LDHA;RPS19;FTH1;FASN;CFL1;PGK1;TXNIP;P4HB;CALM2;TPT1
Diclofenac-10 mg/kg in Corn Oil-Rat-Liver-5d-up	18/305	6.40793e-11	2.2233e-09	0	0	7.24128	169.959	HSPA8;NQO1;JUN;TRAM1;NPM1;RPL23;RPS6;ASNS;RPS3A;C3;TUBA1B;PLAU;FTH1;CFL1;LCN2;RPS20;P4HB;TGM2
Miconazole-200 mg/kg in Corn Oil-Rat-Liver-5d-dn	18/305	6.40793e-11	2.21355e-09	0	0	7.24128	169.959	TRAM1;RPL10;RPL23;ATP1B1;ICAM1;VEGFA;FADS2;LDHA;H1F0;RPS19;FASN;CFL1;PGK1;TXNIP;P4HB;SLC38A2;CALM2;TPT1
Pantoprazole-1100 mg/kg in Water-Rat-Liver-1d-up	18/305	6.40793e-11	2.20388e-09	0	0	7.24128	169.959	ABCC3;HSPA8;NQO1;RPL23;RPS6;RPS3A;YBX1;EEF2;C3;FADS2;LDHA;RPS19;PSAT1;FTH1;CFL1;PGK1;RPS20;P4HB
Famotidine-1200 mg/kg in CMC-Rat-Heart-1d-dn	17/266	6.47657e-11	2.2178e-09	0	0	7.84169	183.968	ITGB1;HSPA8;RPL10;RPL23;IGFBP3;RPS3A;YBX1;ATP1B1;EEF2;CTGF;VEGFA;LDHA;PGK1;TXNIP;VIM;SLC38A2;TGM2
Ubenimex-1300 mg/kg in Water-Rat-Kidney-5d-up	19/347	6.63182e-11	2.26114e-09	0	0	6.71841	157.456	HSPA8;NQO1;GPX2;RPL10;RPL23;RPS6;ASNS;RPS3A;ATP1B1;EEF2;LDHA;H1F0;TUBA1B;RPS19;PSAT1;PSMD3;RPS20;VIM;TGM2
Bromodichloromethane-430 mg/kg in CMC-Rat-Kidney-5d-up	18/306	6.76127e-11	2.29534e-09	0	0	7.21761	169.016	GPX2;NPM1;RPL10;RPL23;IGFBP3;RPS6;ASNS;RPS3A;ATP1B1;VEGFA;RPS19;FTH1;PSMD3;PGK1;SPP1;RPS20;P4HB;TPT1
Sildenafil-2.5 mg/kg in Water-Rat-Liver-5d-up	18/307	7.13265e-11	2.41102e-09	0	0	7.1941	168.081	TRAM1;RPL23;IGFBP3;RPS6;RPS3A;ICAM1;C3;LDHA;TUBA1B;RPS19;FTH1;CFL1;LCN2;RPS20;SLC38A2;CALM2;TPT1;TGM2
Tobramycin-40 mg/kg in Saline-Rat-Kidney-14d-up	18/307	7.13265e-11	2.40072e-09	0	0	7.1941	168.081	TRAM1;GPX2;RPL10;RPL23;RPS6;RPS3A;YBX1;ATP1B1;LDHA;TUBA1B;RPS19;FTH1;PGK1;LCN2;SPP1;VIM;CALM2;TPT1
Diethylstilbestrol-2.8 mg/kg in Corn Oil-Rat-Spleen-0.25d-up	19/349	7.31654e-11	2.45213e-09	0	0	6.67991	155.898	ITGB1;HSPA8;NPM1;RPL10;RPL23;IGFBP3;RPS3A;EEF2;LDHA;TUBA1B;RPS19;CFL1;PGK1;TXNIP;RPS20;VIM;P4HB;CALM2;TPT1
Carbon Tetrachloride-775 uM in DMSO-Rat-Primary rat hepatocytes-0.67d-up	18/308	7.5229e-11	2.51061e-09	0	0	7.17074	167.153	HSPA8;TRAM1;NPM1;RPL23;RPS6;ASNS;RPS3A;NAP1L1;CTGF;LDHA;TUBA1B;RPS19;PSAT1;PSMD3;LCN2;RPS20;P4HB;TPT1
Hydralazine-280 mg/kg in Water-Rat-Liver-0.25d-up	18/309	7.93291e-11	2.63627e-09	0	0	7.14754	166.233	RPL10;RPS6;RPS3A;ATP1B1;EEF2;ICAM1;LDHA;RPS19;FTH1;FASN;CFL1;PSMD3;PGK1;TXNIP;RPS20;SLC38A2;CALM2;TPT1
Sodium Selenite-2 mg/kg in Water-Rat-Kidney-3d-dn	17/270	8.18228e-11	2.70772e-09	0	0	7.72552	179.436	HSPA8;JUN;RPL10;RPL23;RPS6;YBX1;EEF2;CTGF;AKAP12;H1F0;TUBA1B;RPS19;FTH1;CFL1;SPP1;TXNIP;RPS20
Dibromochloromethane-325 mg/kg in CMC-Rat-Kidney-1d-up	18/310	8.3636e-11	2.75614e-09	0	0	7.12448	165.32	NQO1;GPX2;NPM1;RPL10;RPL23;IGFBP3;RPS6;ASNS;RPS3A;ATP1B1;RPS19;PSMD3;PGK1;SPP1;TXNIP;RPS20;P4HB;TPT1
Rofecoxib-3 mg/kg in Corn Oil-Rat-Liver-1d-up	19/352	8.46797e-11	2.77891e-09	0	0	6.62298	153.601	HSPA8;NQO1;NPM1;RPL10;STAT1;IGFBP3;RPS6;ASNS;RPS3A;EEF2;FADS2;RPS19;PLAU;CFL1;LCN2;TXNIP;RPS20;VIM;CALM2
Lovastatin-450 mg/kg in Corn Oil-Rat-Liver-3d-up	17/271	8.66932e-11	2.83318e-09	0	0	7.69701	178.329	HSPA8;NPM1;RPL10;RPL23;RPS6;EEF2;ICAM1;FADS2;H1F0;RPS19;PLAU;FTH1;FASN;TXNIP;RPS20;CALM2;TPT1
Azauridine-1500 mg/kg in CMC-Rat-Bone marrow-3d-up	18/311	8.81592e-11	2.86918e-09	0	0	7.10157	164.415	HSPA8;TRAM1;NPM1;RPS6;RPS3A;NAP1L1;LDHA;TUBA1B;RPS19;FTH1;CFL1;PGK1;LCN2;TXNIP;RPS20;VIM;P4HB;CALM2
Sodium Orthovanadate-83 mg/kg in CMC-Rat-Kidney-3d-up	18/311	8.81592e-11	2.85737e-09	0	0	7.10157	164.415	HSPA8;JUN;NPM1;RPL10;IGFBP3;RPS3A;ATP1B1;CTGF;VEGFA;LDHA;TUBA1B;PSAT1;CFL1;SPP1;TXNIP;SLC38A2;CALM2;TPT1
Atropine-94 mg/kg in Water-Rat-Heart-5d-dn	19/353	8.88784e-11	2.86888e-09	0	0	6.60422	152.846	HSPA8;RPL23;TPM1;RPS6;RPS3A;ATP1B1;CTGF;LDHA;TUBA1B;RPS19;FTH1;CFL1;PGK1;VIM;P4HB;SLC38A2;CALM2;TPT1;TGM2
(+)-Pulegone-200 mg/kg in CMC-Rat-Kidney-3d-dn	18/312	9.29087e-11	2.98673e-09	0	0	7.07881	163.516	TRAM1;RPL10;RPL23;RPS6;EEF2;CTGF;LDHA;H1F0;TUBA1B;RPS19;PLAU;PSAT1;FTH1;CFL1;RPS20;P4HB;CALM2;TGM2
Cadmium Acetate-167 mg/kg in Water-Rat-Kidney-1d-up	18/312	9.29087e-11	2.97459e-09	0	0	7.07881	163.516	ITGB1;HSPA8;TRAM1;NPM1;RPL10;RPS3A;YBX1;ATP1B1;LDHA;H1F0;RPS19;SPP1;TXNIP;VIM;SLC38A2;CALM2;TPT1;TGM2
Ethylestrenol-390 mg/kg in CMC-Rat-Liver-5d-dn	18/312	9.29087e-11	2.96255e-09	0	0	7.07881	163.516	HSPA8;NPM1;RPL10;RPL23;IGFBP3;RPS6;FADS2;LDHA;TUBA1B;RPS19;FTH1;FASN;CFL1;PGK1;TXNIP;RPS20;P4HB;TPT1
Sodium Orthovanadate-83 mg/kg in CMC-Rat-Kidney-5d-up	18/312	9.29087e-11	2.9506e-09	0	0	7.07881	163.516	ITGB1;NPM1;IGFBP3;RPS6;VEGFA;LDHA;TUBA1B;RPS19;PLAU;PSAT1;FTH1;CFL1;SPP1;RPS20;P4HB;SLC38A2;CALM2;TPT1
Stannous Fluoride-90 mg/kg in Water-Rat-Kidney-3d-dn	17/273	9.72494e-11	3.07605e-09	0	0	7.64062	176.145	ITGB1;HSPA8;JUN;NPM1;RPL10;RPL23;YBX1;VEGFA;TUBA1B;PSAT1;CFL1;PGK1;SPP1;TXNIP;P4HB;SLC38A2;TGM2
Oxymetazoline-0.5 mg/kg in Water-Rat-Liver-5d-up	18/313	9.78949e-11	3.08408e-09	0	0	7.05619	162.625	HSPA8;JUN;TRAM1;NPM1;RPL10;RPS6;ATP1B1;ICAM1;VEGFA;C3;FADS2;LDHA;FTH1;FASN;PGK1;P4HB;SLC38A2;TPT1
Melatonin-2000 mg/kg in Corn Oil-Rat-Liver-3d-up	17/274	1.02963e-10	3.23081e-09	0	0	7.61274	175.067	ABCC3;HSPA8;NQO1;GPX2;NPM1;RPL10;RPS6;RPS3A;EEF2;ICAM1;RPS19;PSAT1;FTH1;CFL1;PSMD3;PGK1;P4HB
Nevirapine-200 mg/kg in Saline-Rat-Liver-5d-dn	17/274	1.02963e-10	3.21799e-09	0	0	7.61274	175.067	HSPA8;ANXA2;RPS6;RPS3A;ATP1B1;EEF2;C3;FADS2;LDHA;H1F0;TUBA1B;RPS19;FTH1;FASN;PGK1;SLC38A2;TPT1
(+)-Pulegone-200 mg/kg in CMC-Rat-Kidney-5d-dn	18/314	1.03129e-10	3.21044e-09	0	0	7.03372	161.741	JUN;RPL10;RPS6;NAP1L1;YBX1;ATP1B1;EEF2;LDHA;H1F0;RPS19;PLAU;FTH1;CFL1;PGK1;SPP1;CALM2;TPT1;TGM2
Cetylpyridinium Bromide-16.5 mg/kg in Water-Rat-Liver-1d-up	18/314	1.03129e-10	3.1978e-09	0	0	7.03372	161.741	NQO1;TRAM1;NPM1;RPL10;RPS6;RPS3A;YBX1;ATP1B1;C3;LDHA;TUBA1B;RPS19;FTH1;CFL1;PGK1;P4HB;CALM2;TPT1
D-Limonene-1650 mg/kg in Corn Oil-Rat-Kidney-1d-up	18/314	1.03129e-10	3.18526e-09	0	0	7.03372	161.741	ITGB1;HSPA8;NQO1;GPX2;PLOD2;RPS3A;VEGFA;LDHA;TUBA1B;PSAT1;FTH1;CFL1;PGK1;SPP1;TXNIP;SLC38A2;CALM2;TPT1
Primaquine-45 mg/kg in CMC-Rat-Liver-5d-up	18/315	1.08621e-10	3.3418e-09	0	0	7.01139	160.863	NQO1;RPL10;RPL23;RPS6;RPS3A;YBX1;EEF2;C3;FADS2;RPS19;FTH1;FASN;CFL1;PGK1;LCN2;RPS20;P4HB;TPT1
Venlafaxine-320 mg/kg in Water-Rat-Heart-3d-up	18/315	1.08621e-10	3.3288e-09	0	0	7.01139	160.863	ITGB1;HSPA8;RPL10;RPL23;IGFBP3;RPS6;PLOD2;RPS3A;YBX1;CTGF;LDHA;RPS19;TXNIP;RPS20;VIM;CALM2;TPT1;TGM2
Bromisovalum-250 mg/kg in Corn Oil-Rat-Liver-1d-dn	18/316	1.14384e-10	3.49183e-09	0	0	6.98921	159.993	TRAM1;IGFBP3;RPS6;ICAM1;C3;FADS2;LDHA;TUBA1B;PLAU;FTH1;FASN;PGK1;TXNIP;RPS20;P4HB;CALM2;TPT1;RAI14
Paroxetine-30 uM in DMSO-Rat-Primary rat hepatocytes-0.67d-up	18/316	1.14384e-10	3.47835e-09	0	0	6.98921	159.993	NPM1;RPL23;RPS6;ASNS;RPS3A;CTGF;SLC7A5;LDHA;TUBA1B;PSAT1;FASN;PSMD3;PGK1;LCN2;RPS20;P4HB;SLC38A2;TPT1
Cholecalciferol-8 mg/kg in CMC-Rat-Heart-3d-dn	18/317	1.2043e-10	3.64811e-09	0	0	6.96716	159.13	HSPA8;RPL10;RPL23;TPM1;RPS6;RPS3A;ATP1B1;VEGFA;LDHA;TUBA1B;RPS19;FTH1;PGK1;RPS20;VIM;SLC38A2;CALM2;TPT1
Tacrolimus-134 mg/kg in CMC-Rat-Kidney-1d-dn	17/277	1.22021e-10	3.68212e-09	0	0	7.53029	171.893	TRAM1;NPM1;RPL10;RPL23;YBX1;CTGF;LDHA;H1F0;TUBA1B;RPS19;CFL1;PGK1;SPP1;P4HB;SLC38A2;CALM2;TPT1
Anastrozole-400 mg/kg in CMC-Rat-Liver-3d-up	18/318	1.26772e-10	3.8109e-09	0	0	6.94525	158.273	ABCC3;NQO1;GPX2;NPM1;RPL10;RPL23;RPS6;RPS3A;ICAM1;TUBA1B;RPS19;PSAT1;CFL1;PSMD3;PGK1;RPS20;P4HB;SLC38A2
Nateglinide-625 mg/kg in CMC-Rat-Kidney-1d-dn	18/318	1.26772e-10	3.79641e-09	0	0	6.94525	158.273	ITGB1;NPM1;RPL10;RPL23;RPS6;PLOD2;CTGF;LDHA;RPS19;PLAU;PSAT1;FTH1;PGK1;SPP1;RPS20;SLC38A2;CALM2;TGM2
Naproxen-134 mg/kg in Corn Oil-Rat-Kidney-3d-up	17/278	1.29066e-10	3.85047e-09	0	0	7.5032	170.853	HSPA8;JUN;RPL10;RPL23;RPS6;RPS3A;NAP1L1;ATP1B1;CTGF;VEGFA;LDHA;FTH1;LCN2;SPP1;TXNIP;RPS20;VIM
Stavudine-1400 mg/kg in Water-Rat-Liver-3d-up	18/319	1.33422e-10	3.96541e-09	0	0	6.92348	157.423	HSPA8;NQO1;NPM1;RPL10;RPL23;RPS6;RPS3A;YBX1;ATP1B1;C3;LDHA;RPS19;FTH1;CFL1;RPS20;P4HB;CALM2;TPT1
Sporidesmin A-0.15 uM in DMSO-Rat-Primary rat hepatocytes-0.67d-up	17/279	1.36487e-10	4.04123e-09	0	0	7.47631	169.823	HSPA8;NQO1;GPX2;NPM1;RPL23;YBX1;EEF2;VEGFA;H1F0;RPS19;CFL1;PSMD3;TXNIP;RPS20;CALM2;TPT1;RAI14
Sulfaphenazole-1695 mg/kg in Water-Rat-Liver-5d-dn	17/279	1.36487e-10	4.0261e-09	0	0	7.47631	169.823	HSPA8;RPL10;RPL23;IGFBP3;RPS6;ICAM1;VEGFA;C3;FADS2;LDHA;H1F0;TUBA1B;RPS19;FTH1;FASN;TXNIP;RPS20
Cisplatin-1.17 mg/kg in Saline-Rat-Kidney-5d-up	17/280	1.443e-10	4.2407e-09	0	0	7.44961	168.802	GPX2;RPL10;RPL23;RPS6;YBX1;ATP1B1;VEGFA;LDHA;H1F0;RPS19;PLAU;LCN2;SPP1;TXNIP;RPS20;CALM2;TPT1
Ketamine-30 mg/kg in Saline-Rat-Heart-1d-dn	17/280	1.443e-10	4.22494e-09	0	0	7.44961	168.802	NPM1;RPL10;STAT1;RPL23;IGFBP3;RPS6;RPS3A;YBX1;ICAM1;VEGFA;LDHA;RPS19;PGK1;TXNIP;P4HB;SLC38A2;TPT1
Phenacetin-619 mg/kg in Corn Oil-Rat-Liver-5d-up	17/280	1.443e-10	4.20929e-09	0	0	7.44961	168.802	ABCC3;NQO1;TRAM1;NPM1;RPL23;RPS6;RPS3A;VEGFA;C3;RPS19;PSAT1;FASN;PGK1;RPS20;P4HB;SLC38A2;TPT1
2-Amino-4-Nitrophenol-625 mg/kg in CMC-Rat-Heart-1d-dn	18/321	1.47705e-10	4.29271e-09	0	0	6.88034	155.742	HSPA8;NPM1;RPL10;IGFBP3;RPS6;RPS3A;CTGF;LDHA;TUBA1B;RPS19;PGK1;TXNIP;VIM;P4HB;SLC38A2;CALM2;TPT1;TGM2
Droperidol-94 mg/kg in CMC-Rat-Heart-5d-dn	18/321	1.47705e-10	4.27693e-09	0	0	6.88034	155.742	ITGB1;JUN;RPL23;TPM1;RPS3A;YBX1;ATP1B1;CTGF;LDHA;TUBA1B;RPS19;FTH1;CFL1;TXNIP;VIM;P4HB;TPT1;TGM2
Terbutaline-130 mg/kg in Corn Oil-Rat-Heart-3d-up	18/321	1.47705e-10	4.26126e-09	0	0	6.88034	155.742	ITGB1;HSPA8;NPM1;RPL10;RPL23;TPM1;RPS6;PLOD2;RPS3A;ATP1B1;EEF2;CTGF;TUBA1B;RPS19;RPS20;VIM;P4HB;TPT1
Gentamicin-656.6 uM in DMSO-Rat-Primary rat hepatocytes-1d-dn	19/364	1.49781e-10	4.30539e-09	0	0	6.40464	144.885	NQO1;NPM1;RPL10;RPS6;RPS3A;YBX1;LDHA;TUBA1B;RPS19;FTH1;CFL1;PSMD3;PGK1;LCN2;RPS20;P4HB;CALM2;TPT1;TGM2
Etoposide-188 mg/kg in Corn Oil-Rat-Heart-5d-dn	18/323	1.63396e-10	4.67967e-09	0	0	6.83774	154.087	HSPA8;RPL10;RPL23;TPM1;RPS6;RPS3A;EEF2;IFIT2;CTGF;VEGFA;LDHA;TUBA1B;RPS19;CFL1;PGK1;VIM;SLC38A2;CALM2
Valproic Acid-850 mg/kg in Water-Rat-Kidney-3d-dn	16/244	1.66115e-10	4.7403e-09	0	0	8.04586	181.179	JUN;RPL23;RPS6;ATP1B1;CTGF;VEGFA;H1F0;TUBA1B;PSAT1;FTH1;CFL1;PGK1;TXNIP;VIM;SLC38A2;TGM2
Doxepin-132 uM in DMSO-Rat-Primary rat hepatocytes-0.67d-up	17/283	1.70295e-10	4.84202e-09	0	0	7.37063	165.791	NPM1;RPL10;RPS6;ASNS;RPS3A;YBX1;CTGF;SLC7A5;LDHA;RPS19;PSAT1;FTH1;FASN;LCN2;RPS20;P4HB;SLC38A2
Phalloidin-1 uM in DMSO-Rat-Primary rat hepatocytes-0.67d-up	17/283	1.70295e-10	4.82461e-09	0	0	7.37063	165.791	ITGB1;ANXA2;RPS6;ICAM1;CTGF;C3;LDHA;TUBA1B;RPS19;CFL1;PGK1;LCN2;TXNIP;RPS20;ITGAV;CALM2;TGM2
Cholecalciferol-8 mg/kg in CMC-Rat-Kidney-3d-up	18/324	1.71809e-10	4.85007e-09	0	0	6.81663	153.27	HSPA8;NQO1;JUN;GPX2;NPM1;RPL10;YBX1;ATP1B1;LDHA;RPS19;PLAU;FTH1;CFL1;LCN2;SPP1;TXNIP;P4HB;TPT1
Azathioprine-20 mg/kg in Corn Oil-Rat-Liver-3d-dn	17/284	1.7988e-10	5.05976e-09	0	0	7.34468	164.805	HSPA8;NQO1;JUN;RPL10;IGFBP3;RPS6;ICAM1;VEGFA;LDHA;H1F0;RPS19;FASN;CFL1;PGK1;RPS20;SLC38A2;TPT1
Tacrolimus-50 uM in DMSO-Rat-Primary rat hepatocytes-0.67d-up	17/284	1.7988e-10	5.04176e-09	0	0	7.34468	164.805	HSPA8;NQO1;NPM1;RPS6;ASNS;RPS3A;NAP1L1;YBX1;SLC7A5;LDHA;H1F0;TUBA1B;RPS19;FTH1;LCN2;P4HB;SLC38A2
Alendronic Acid-138 mg/kg in CMC-Rat-Heart-1d-dn	18/325	1.80622e-10	5.04462e-09	0	0	6.79566	152.458	HSPA8;NPM1;RPL10;RPS6;PLOD2;RPS3A;ATP1B1;CTGF;TUBA1B;CFL1;PSMD3;PGK1;TXNIP;VIM;P4HB;CALM2;TPT1;TGM2
Oxcarbazepine-1600 mg/kg in CMC-Rat-Heart-5d-dn	18/325	1.80622e-10	5.02679e-09	0	0	6.79566	152.458	RPL10;TPM1;RPS6;RPS3A;YBX1;ATP1B1;EEF2;LDHA;H1F0;TUBA1B;RPS19;FTH1;PGK1;TXNIP;VIM;CALM2;TPT1;TGM2
Doxapram-20 mg/kg in Saline-Rat-Heart-1d-up	18/326	1.89854e-10	5.2651e-09	0	0	6.77481	151.653	ITGB1;ABCC3;TRAM1;NPM1;RPL10;RPL23;TPM1;RPS6;CTGF;LDHA;H1F0;TUBA1B;RPS19;FTH1;VIM;P4HB;CALM2;TPT1
Diethylstilbestrol-280 mg/kg in Corn Oil-Rat-Liver-0.25d-up	17/285	1.89962e-10	5.24962e-09	0	0	7.31891	163.828	HSPA8;NQO1;NPM1;RPL10;RPL23;TXNRD1;RPS6;RPS3A;YBX1;TUBA1B;RPS19;FTH1;CFL1;PSMD3;P4HB;SLC38A2;RAI14
Oxcarbazepine-1600 mg/kg in CMC-Rat-Heart-1d-dn	17/285	1.89962e-10	5.23126e-09	0	0	7.31891	163.828	HSPA8;RPL10;RPL23;TPM1;RPS6;RPS3A;ATP1B1;CTGF;LDHA;TUBA1B;RPS19;CFL1;PGK1;VIM;SLC38A2;CALM2;TGM2
Tenidap-41 uM in DMSO-Rat-Primary rat hepatocytes-1d-up	16/247	1.99039e-10	5.46214e-09	0	0	7.94814	177.542	HSPA8;RPL10;RPL23;RPS3A;NAP1L1;YBX1;CTGF;LOXL2;LDHA;TUBA1B;FTH1;PGK1;LCN2;SLC38A2;TGM2;RAI14
2-Acetylaminofluorene-30 mg/kg in CMC-Rat-Kidney-3d-dn	18/327	1.99521e-10	5.45635e-09	0	0	6.75409	150.853	HSPA8;TRAM1;NPM1;RPL10;RPL23;RPS6;ATP1B1;LDHA;H1F0;PLAU;PSAT1;PGK1;SPP1;RPS20;P4HB;SLC38A2;CALM2;TPT1
Ampiroxicam-94 mg/kg in CMC-Rat-Kidney-5d-up	18/329	2.2024e-10	6.00212e-09	0	0	6.71304	149.273	HSPA8;NQO1;JUN;NPM1;RPL23;RPS6;RPS3A;CTGF;VEGFA;LDHA;H1F0;RPS19;PGK1;LCN2;SPP1;TXNIP;RPS20;TPT1
Hydralazine-280 mg/kg in Water-Rat-Liver-1d-up	18/329	2.2024e-10	5.98143e-09	0	0	6.71304	149.273	HSPA8;NQO1;NPM1;RPL10;RPL23;RPS6;RPS3A;ATP1B1;IFIT2;ICAM1;VEGFA;RPS19;PSAT1;FTH1;PSMD3;RPS20;SLC38A2;TPT1
Clotrimazole-89 mg/kg in Corn Oil-Rat-Liver-3d-up	17/288	2.23432e-10	6.04724e-09	0	0	7.24267	160.946	ABCC3;HSPA8;NQO1;GPX2;NPM1;RPL10;RPL23;RPS3A;EEF2;ICAM1;RPS19;PLAU;FTH1;CFL1;PSMD3;RPS20;CALM2
Lipopolysaccharide E. Coli O55:B5-1.25 mg/kg in Saline-Rat-Liver-0.25d-up	17/288	2.23432e-10	6.02653e-09	0	0	7.24267	160.946	HSPA8;RPL10;RPL23;RPS6;RPS3A;C3;LDHA;RPS19;FTH1;CFL1;LCN2;RPS20;P4HB;SLC38A2;CALM2;TPT1;TGM2
Urethane-453 mg/kg in Water-Rat-Bone marrow-3d-up	17/288	2.23432e-10	6.00597e-09	0	0	7.24267	160.946	ITGB1;TRAM1;NPM1;RPL23;RPS6;NAP1L1;YBX1;C3;LDHA;TUBA1B;RPS19;CFL1;PGK1;TXNIP;VIM;P4HB;CALM2
Leflunomide-60 mg/kg in Corn Oil-Rat-Liver-1d-dn	19/373	2.26453e-10	6.06648e-09	0	0	6.2501	138.805	TRAM1;NPM1;RPL10;RPL23;IGFBP3;RPS6;RPS3A;C3;FADS2;LDHA;FTH1;FASN;CFL1;PGK1;RPS20;P4HB;CALM2;TPT1;TGM2
Acyclovir-980 mg/kg in Saline-Rat-Liver-0.25d-up	17/289	2.35748e-10	6.29407e-09	0	0	7.21761	160.002	NQO1;RPL10;RPL23;RPS6;RPS3A;YBX1;ICAM1;VEGFA;FADS2;LDHA;FTH1;CFL1;PGK1;RPS20;SLC38A2;CALM2;TGM2
BW-723C86-50 mg/kg in Saline-Rat-Heart-1d-up	17/289	2.35748e-10	6.2728e-09	0	0	7.21761	160.002	ITGB1;TRAM1;NPM1;RPL10;RPL23;RPS6;PLOD2;RPS3A;CTGF;LDHA;RPS19;FTH1;CFL1;SPP1;RPS20;P4HB;CALM2
Dyphylline-3855 mg/kg in CMC-Rat-Heart-5d-up	17/289	2.35748e-10	6.25168e-09	0	0	7.21761	160.002	ITGB1;JUN;RPL23;TPM1;RPS6;RPS3A;YBX1;ATP1B1;CTGF;VEGFA;RPS19;PGK1;TXNIP;VIM;P4HB;SLC38A2;CALM2
Epalrestat-2500 mg/kg in CMC-Rat-Liver-1d-up	17/289	2.35748e-10	6.23071e-09	0	0	7.21761	160.002	ITGB1;ABCC3;HSPA8;NQO1;NPM1;RPL10;RPS6;ASNS;ICAM1;RPS19;PSAT1;FTH1;CFL1;PGK1;P4HB;SLC38A2;TPT1
Lipopolysaccharide E. Coli O55:B5-1.25 mg/kg in Saline-Rat-Kidney-5d-up	17/289	2.35748e-10	6.20987e-09	0	0	7.21761	160.002	JUN;NPM1;RPL10;RPL23;RPS6;EEF2;C3;H1F0;TUBA1B;RPS19;CFL1;PGK1;LCN2;TXNIP;RPS20;P4HB;TPT1
Nitrendipine-1100 mg/kg in Corn Oil-Rat-Heart-3d-up	17/289	2.35748e-10	6.18917e-09	0	0	7.21761	160.002	HSPA8;TRAM1;NPM1;ANXA2;RPL10;RPL23;TPM1;RPS6;RPS3A;YBX1;VEGFA;TUBA1B;RPS19;CFL1;RPS20;VIM;TPT1
Sodium Arsenite-30 mg/kg in Saline-Rat-Liver-0.25d-up	17/289	2.35748e-10	6.16861e-09	0	0	7.21761	160.002	HSPA8;NQO1;RPL10;RPL23;RPS6;RPS3A;YBX1;ATP1B1;ICAM1;LDHA;FTH1;PSMD3;PGK1;RPS20;P4HB;SLC38A2;TPT1
Mercuric Chloride-2.5 mg/kg in Water-Rat-Kidney-5d-dn	16/250	2.37891e-10	6.20406e-09	0	0	7.85276	174.011	HSPA8;JUN;RPL10;RPS6;RPS3A;EEF2;VEGFA;LDHA;H1F0;RPS19;PSAT1;TXNIP;RPS20;CALM2;TPT1;TGM2
Olanzapine-250 uM in DMSO-Rat-Primary rat hepatocytes-1d-up	16/250	2.37891e-10	6.18358e-09	0	0	7.85276	174.011	HSPA8;NQO1;NPM1;ANXA2;RPL23;ASNS;RPS3A;NAP1L1;SLC7A5;LDHA;TUBA1B;PSAT1;FASN;PGK1;RPS20;SLC38A2
Dicyclomine-645 mg/kg in Water-Rat-Heart-3d-dn	18/331	2.42941e-10	6.29408e-09	0	0	6.67247	147.717	RPL10;RPL23;TPM1;RPS6;RPS3A;CTGF;VEGFA;LDHA;RPS19;FTH1;CFL1;PGK1;TXNIP;RPS20;VIM;CALM2;TPT1;TGM2
Mestranol-250 mg/kg in CMC-Rat-Liver-1d-up	17/290	2.48689e-10	6.42189e-09	0	0	7.19272	159.066	HSPA8;NQO1;NPM1;RPL10;RPL23;RPS6;RPS3A;VEGFA;TUBA1B;RPS19;FTH1;CFL1;PGK1;RPS20;VIM;CALM2;TGM2
Roxithromycin-312 mg/kg in CMC-Rat-Liver-1d-dn	17/290	2.48689e-10	6.40091e-09	0	0	7.19272	159.066	NQO1;TRAM1;NPM1;RPL23;RPS6;RPS3A;ATP1B1;ICAM1;LDHA;RPS19;FASN;PGK1;TXNIP;RPS20;P4HB;SLC38A2;CALM2
1-Naphthyl Isothiocyanate-60 mg/kg in Corn Oil-Rat-Kidney-1d-up	18/332	2.55087e-10	6.54419e-09	0	0	6.65238	146.947	HSPA8;NQO1;GPX2;RPL10;RPL23;RPS6;ASNS;RPS3A;LDHA;RPS19;PSAT1;FTH1;LCN2;SPP1;TXNIP;RPS20;TGM2;RAI14
CerIVastatin-7 mg/kg in Corn Oil-Rat-Kidney-1d-dn	18/332	2.55087e-10	6.52295e-09	0	0	6.65238	146.947	HSPA8;TRAM1;RPL10;RPL23;RPS6;RPS3A;ATP1B1;EEF2;LDHA;H1F0;TUBA1B;RPS19;PSAT1;PGK1;RPS20;P4HB;CALM2;TGM2
Oxymetazoline-0.5 mg/kg in Water-Rat-Liver-0.25d-up	19/376	2.59229e-10	6.6074e-09	0	0	6.20023	136.86	TRAM1;NPM1;RPL10;RPL23;RPS6;ATP1B1;ICAM1;VEGFA;C3;LDHA;RPS19;FTH1;PGK1;RPS20;P4HB;SLC38A2;CALM2;TPT1;RAI14
6-Methoxy-2-Naphthylacetic Acid-360 mg/kg in Saline-Rat-Kidney-5d-up	17/291	2.62285e-10	6.66373e-09	0	0	7.16801	158.138	HSPA8;NPM1;RPL10;RPL23;IGFBP3;RPS3A;YBX1;ATP1B1;VEGFA;LDHA;RPS19;FTH1;LCN2;SPP1;TXNIP;RPS20;TPT1
Phenylbutazone-368 mg/kg in CMC-Rat-Kidney-1d-up	17/291	2.62285e-10	6.64231e-09	0	0	7.16801	158.138	HSPA8;GPX2;NPM1;RPL10;RPS6;PLOD2;ATP1B1;LDHA;TUBA1B;RPS19;PSMD3;PGK1;SPP1;TXNIP;P4HB;SLC38A2;CALM2
Benzethonium Chloride-30 mg/kg in Corn Oil-Rat-Heart-1d-up	16/252	2.67553e-10	6.75399e-09	0	0	7.79044	171.715	ITGB1;NPM1;RPL10;RPS6;RPS3A;ATP1B1;CTGF;LDHA;TUBA1B;RPS19;CFL1;PGK1;LCN2;P4HB;TPT1;TGM2
Cyclosporin A-350 mg/kg in Corn Oil-Rat-Kidney-3d-up	18/333	2.67795e-10	6.73851e-09	0	0	6.6324	146.183	HSPA8;TRAM1;NPM1;RPL10;RPL23;RPS6;ASNS;RPS3A;ATP1B1;LDHA;RPS19;SPP1;TXNIP;RPS20;VIM;P4HB;CALM2;TGM2
Methyl Salicylate-444 mg/kg in Corn Oil-Rat-Kidney-5d-up	18/333	2.67795e-10	6.71705e-09	0	0	6.6324	146.183	JUN;GPX2;NPM1;RPL10;IGFBP3;ATP1B1;EEF2;LDHA;H1F0;TUBA1B;RPS19;PLAU;PSAT1;CFL1;TXNIP;P4HB;SLC38A2;TPT1
Pentobarbital-20 mg/kg in Water-Rat-Liver-1d-up	18/333	2.67795e-10	6.69573e-09	0	0	6.6324	146.183	HSPA8;NQO1;TRAM1;RPL23;RPS6;RPS3A;YBX1;ICAM1;C3;FADS2;TUBA1B;RPS19;FTH1;CFL1;PGK1;P4HB;CALM2;RAI14
Cyclosporin A-70 mg/kg in Corn Oil-Rat-Kidney-1d-up	19/377	2.71099e-10	6.75689e-09	0	0	6.18379	136.22	NPM1;RPL10;RPS6;ASNS;RPS3A;ATP1B1;LDHA;RPS19;PSAT1;FTH1;PSMD3;PGK1;SPP1;TXNIP;P4HB;CALM2;TPT1;TGM2;RAI14
4-Chloroaniline-75 mg/kg in CMC-Rat-Kidney-1d-dn	17/292	2.76565e-10	6.87138e-09	0	0	7.14346	157.217	TRAM1;RPL10;RPS6;PLOD2;YBX1;ATP1B1;EEF2;LDHA;TUBA1B;RPS19;PSAT1;CFL1;PGK1;SPP1;SLC38A2;CALM2;TGM2
Acetaminophen-486 mg/kg in Corn Oil-Rat-Kidney-1d-dn	17/293	2.91561e-10	7.22119e-09	0	0	7.11908	156.305	RPL10;RPS6;RPS3A;YBX1;EEF2;CTGF;LDHA;TUBA1B;PSAT1;FTH1;CFL1;PGK1;TXNIP;P4HB;CALM2;TPT1;TGM2
Lead (II) Acetate-2 mg/kg in Saline-Rat-Kidney-14d-up	18/335	2.9499e-10	7.2832e-09	0	0	6.5928	144.673	NQO1;GPX2;RPL10;RPL23;RPS6;RPS3A;YBX1;ATP1B1;LDHA;TUBA1B;RPS19;PLAU;FTH1;PGK1;SPP1;RPS20;P4HB;CALM2
Mitomycin C-0.5 mg/kg in Saline-Rat-Liver-1d-dn	18/335	2.9499e-10	7.26044e-09	0	0	6.5928	144.673	TRAM1;RPL10;RPS6;ATP1B1;EEF2;ICAM1;FADS2;LDHA;TUBA1B;RPS19;FTH1;FASN;CFL1;PGK1;RPS20;P4HB;SLC38A2;CALM2
Niacin-2625 mg/kg in Water-Rat-Liver-1d-up	17/294	3.07306e-10	7.54001e-09	0	0	7.09486	155.4	HSPA8;NQO1;TRAM1;RPL23;RPS6;RPS3A;VEGFA;C3;FADS2;RPS19;FTH1;FASN;TXNIP;RPS20;P4HB;CALM2;TPT1
Noscapine-570 mg/kg in CMC-Rat-Bone marrow-5d-dn	17/294	3.07306e-10	7.51659e-09	0	0	7.09486	155.4	TRAM1;NPM1;RPL10;RPL23;YBX1;LDHA;TUBA1B;RPS19;FTH1;CFL1;LCN2;TXNIP;VIM;P4HB;SLC38A2;CALM2;TPT1
Thalidomide-113 mg/kg in CMC-Rat-Liver-3d-dn	17/294	3.07306e-10	7.49332e-09	0	0	7.09486	155.4	HSPA8;TRAM1;NPM1;RPL23;IGFBP3;RPS6;RPS3A;C3;LDHA;RPS19;FTH1;FASN;PGK1;RPS20;P4HB;CALM2;TPT1
Zileuton-450 mg/kg in Corn Oil-Rat-Liver-3d-up	17/294	3.07306e-10	7.4702e-09	0	0	7.09486	155.4	ABCC3;HSPA8;NQO1;JUN;NPM1;RPS6;RPS3A;YBX1;EEF2;ICAM1;RPS19;PSAT1;FTH1;PGK1;P4HB;SLC38A2;CALM2
1-Naphthyl Isothiocyanate-30 mg/kg in Corn Oil-Rat-Liver-3d-up	18/336	3.09527e-10	7.50104e-09	0	0	6.57318	143.926	HSPA8;NQO1;NPM1;RPL10;RPL23;RPS6;C3;FADS2;LDHA;TUBA1B;RPS19;FASN;LCN2;RPS20;VIM;CALM2;TPT1;RAI14
Leflunomide-60 mg/kg in Corn Oil-Rat-Kidney-1d-up	18/336	3.09527e-10	7.47803e-09	0	0	6.57318	143.926	HSPA8;NQO1;JUN;GPX2;NPM1;RPL23;IGFBP3;RPS6;ATP1B1;VEGFA;H1F0;RPS19;SPP1;TXNIP;RPS20;CALM2;TPT1;RAI14
N-Nitrosodimethylamine-10 mg/kg in Saline-Rat-Liver-5d-up	17/295	3.23834e-10	7.79974e-09	0	0	7.07081	154.503	ITGB1;TRAM1;NPM1;RPL10;STAT1;RPL23;PLOD2;ATP1B1;CTGF;RPS19;CFL1;PGK1;LCN2;RPS20;P4HB;SLC38A2;TPT1
Acetaminophen-972 mg/kg in Corn Oil-Rat-Liver-1d-up	17/296	3.4118e-10	8.19248e-09	0	0	7.04692	153.613	ABCC3;HSPA8;NQO1;JUN;NPM1;RPL10;RPL23;RPS6;RPS3A;EEF2;RPS19;FTH1;CFL1;PSMD3;PGK1;RPS20;SLC38A2
Leflunomide-30 mg/kg in Corn Oil-Rat-Spleen-0.25d-up	17/296	3.4118e-10	8.16758e-09	0	0	7.04692	153.613	HSPA8;NPM1;RPL10;RPL23;IGFBP3;RPS3A;ATP1B1;EEF2;VEGFA;LDHA;FTH1;CFL1;TXNIP;RPS20;VIM;CALM2;TPT1
Lorazepam-2000 mg/kg in CMC-Rat-Liver-1d-up	17/296	3.4118e-10	8.14283e-09	0	0	7.04692	153.613	ABCC3;HSPA8;NQO1;GPX2;RPL10;RPS6;RPS3A;ATP1B1;ICAM1;VEGFA;TUBA1B;RPS19;CFL1;PSMD3;PGK1;CALM2;TPT1
Oxcarbazepine-1600 mg/kg in CMC-Rat-Kidney-1d-dn	17/296	3.4118e-10	8.11822e-09	0	0	7.04692	153.613	ITGB1;RPL10;RPL23;RPS6;PLOD2;CTGF;VEGFA;H1F0;RPS19;PLAU;PSAT1;FTH1;SPP1;RPS20;SLC38A2;CALM2;TGM2
Dexfenfluramine-29 mg/kg in Water-Rat-Heart-5d-dn	18/339	3.57222e-10	8.47434e-09	0	0	6.51501	141.719	RPL10;RPL23;TPM1;RPS6;RPS3A;ATP1B1;CTGF;VEGFA;LDHA;H1F0;RPS19;CFL1;PGK1;TXNIP;RPS20;VIM;TPT1;TGM2
33'5-Triiodo-L-Thyronine-0.001 mg/kg in PEG400-Rat-Heart-1d-dn	17/297	3.59381e-10	8.49996e-09	0	0	7.0232	152.731	RPL10;STAT1;RPL23;IGFBP3;TPM1;RPS6;AMIGO2;RPS3A;YBX1;ATP1B1;LDHA;RPS19;FTH1;CFL1;VIM;CALM2;TPT1
Diethylstilbestrol-2.8 mg/kg in Corn Oil-Rat-Liver-1d-up	17/297	3.59381e-10	8.47451e-09	0	0	7.0232	152.731	HSPA8;NQO1;NPM1;RPL10;RPL23;RPS6;RPS3A;EEF2;VEGFA;TUBA1B;RPS19;PSAT1;CFL1;RPS20;P4HB;CALM2;RAI14
Eperisone-501 mg/kg in CMC-Rat-Liver-3d-dn	17/297	3.59381e-10	8.44921e-09	0	0	7.0232	152.731	HSPA8;TRAM1;NPM1;RPL23;IGFBP3;YBX1;EEF2;ICAM1;C3;RPS19;FTH1;FASN;CFL1;PGK1;P4HB;CALM2;TPT1
Gemfibrozil-100 mg/kg in Corn Oil-Rat-Liver-0.25d-up	17/297	3.59381e-10	8.42407e-09	0	0	7.0232	152.731	TRAM1;NPM1;RPL10;RPL23;RPS6;RPS3A;ICAM1;CTGF;C3;FADS2;RPS19;FTH1;FASN;TXNIP;P4HB;TPT1;RAI14
Indinavir-1000 mg/kg in CMC-Rat-Kidney-1d-dn	17/297	3.59381e-10	8.39907e-09	0	0	7.0232	152.731	ITGB1;TRAM1;NPM1;RPL10;YBX1;ATP1B1;CTGF;LDHA;PLAU;PSAT1;FTH1;PGK1;SPP1;P4HB;SLC38A2;CALM2;TPT1
Valdecoxib-404 mg/kg in CMC-Rat-Heart-5d-dn	17/297	3.59381e-10	8.37422e-09	0	0	7.0232	152.731	HSPA8;RPL10;RPS6;EEF2;CTGF;VEGFA;LDHA;TUBA1B;RPS19;FTH1;CFL1;PGK1;TXNIP;P4HB;SLC38A2;CALM2;TGM2
Prednisolone-184 mg/kg in Water-Rat-Heart-3d-dn	18/340	3.74577e-10	8.70256e-09	0	0	6.49585	140.994	RPL10;RPL23;TPM1;RPS6;RPS3A;YBX1;CTGF;VEGFA;LDHA;TUBA1B;CFL1;PGK1;RPS20;VIM;SLC38A2;CALM2;TPT1;TGM2
Bezafibrate-617 mg/kg in Corn Oil-Rat-Skeletal muscle-3d-dn	17/298	3.78476e-10	8.76729e-09	0	0	6.99963	151.856	ITGB1;RPL10;TPM1;RPS6;RPS3A;EEF2;VEGFA;LDHA;TUBA1B;RPS19;CFL1;PGK1;TXNIP;VIM;P4HB;CALM2;TPT1
Ethisterone-1500 mg/kg in CMC-Rat-Liver-3d-dn	17/298	3.78476e-10	8.74158e-09	0	0	6.99963	151.856	HSPA8;NQO1;TRAM1;RPL23;IGFBP3;YBX1;ATP1B1;ICAM1;C3;FADS2;LDHA;RPS19;FASN;PGK1;P4HB;CALM2;TPT1
Ethylene Glycol-3525 mg/kg in Water-Rat-Liver-1d-up	17/298	3.78476e-10	8.71602e-09	0	0	6.99963	151.856	NQO1;NPM1;RPL10;RPL23;RPS3A;ICAM1;VEGFA;C3;LDHA;H1F0;PLAU;PSAT1;FTH1;CFL1;RPS20;CALM2;TPT1
Methyldopa-325 mg/kg in Water-Rat-Heart-3d-up	17/298	3.78476e-10	8.69061e-09	0	0	6.99963	151.856	ITGB1;NPM1;RPL10;TPM1;RPS6;RPS3A;YBX1;CTGF;VEGFA;LDHA;CFL1;RPS20;P4HB;SLC38A2;CALM2;TPT1;TGM2
Oxaprozin-1500 mg/kg in CMC-Rat-Kidney-3d-up	17/298	3.78476e-10	8.66535e-09	0	0	6.99963	151.856	HSPA8;JUN;GPX2;NPM1;RPL10;RPL23;RPS6;RPS3A;EEF2;CTGF;RPS19;FTH1;FASN;TXNIP;RPS20;SLC38A2;CALM2
Vinblastine-45 uM in DMSO-Rat-Primary rat hepatocytes-0.67d-up	17/298	3.78476e-10	8.64023e-09	0	0	6.99963	151.856	HSPA8;NPM1;RPL23;RPS6;ASNS;RPS3A;LDHA;TUBA1B;RPS19;PSAT1;FTH1;CFL1;PGK1;LCN2;RPS20;P4HB;SLC38A2
6-Mercaptopurine-25 mg/kg in Corn Oil-Rat-Liver-0.25d-up	17/299	3.98505e-10	9.07118e-09	0	0	6.97622	150.988	HSPA8;NPM1;RPL10;RPL23;RPS6;RPS3A;C3;LDHA;RPS19;PSAT1;FTH1;FASN;CFL1;PSMD3;RPS20;CALM2;TPT1
Atorvastatin-250 uM in DMSO-Rat-Primary rat hepatocytes-0.67d-up	17/299	3.98505e-10	9.04504e-09	0	0	6.97622	150.988	ABCC3;HSPA8;NQO1;NPM1;RPL10;ASNS;RPS3A;NAP1L1;C3;SLC7A5;LDHA;PSAT1;FTH1;LCN2;P4HB;SLC38A2;TPT1
Aminocaproic Acid-2000 mg/kg in Water-Rat-Kidney-3d-dn	16/259	4.00315e-10	9.06001e-09	0	0	7.57988	164.019	ITGB1;TRAM1;NPM1;RPL10;RPL23;IGFBP3;YBX1;ATP1B1;LDHA;H1F0;FTH1;CFL1;PGK1;SPP1;TXNIP;SLC38A2
Doxorubicin-3 mg/kg in Saline-Rat-Heart-1d-dn	18/342	4.11654e-10	9.28994e-09	0	0	6.45786	139.56	ITGB1;JUN;RPL10;RPL23;TPM1;RPS3A;YBX1;ATP1B1;ICAM1;CTGF;VEGFA;CFL1;TXNIP;RPS20;VIM;CALM2;TPT1;TGM2
Acetaminophen-972 mg/kg in Corn Oil-Rat-Liver-3d-up	17/300	4.1951e-10	9.44018e-09	0	0	6.95297	150.128	ABCC3;HSPA8;NQO1;GPX2;NPM1;RPL10;RPL23;RPS6;ASNS;RPS3A;EEF2;VEGFA;C3;RPS19;PSAT1;FTH1;CFL1
Celecoxib-35 mg/kg in Corn Oil-Rat-Heart-5d-dn	17/300	4.1951e-10	9.41328e-09	0	0	6.95297	150.128	HSPA8;JUN;RPL10;RPL23;TPM1;RPS6;RPS3A;IFIT2;CTGF;VEGFA;LDHA;TUBA1B;TXNIP;P4HB;SLC38A2;CALM2;TGM2
Cinnarizine-750 mg/kg in CMC-Rat-Liver-1d-up	17/300	4.1951e-10	9.38654e-09	0	0	6.95297	150.128	ABCC3;HSPA8;NQO1;JUN;NPM1;RPL10;RPS6;RPS3A;ATP1B1;EEF2;RPS19;CFL1;PSMD3;PGK1;SLC38A2;CALM2;TPT1
Crotamiton-750 mg/kg in Corn Oil-Rat-Liver-1d-up	17/300	4.1951e-10	9.35995e-09	0	0	6.95297	150.128	ABCC3;HSPA8;NQO1;GPX2;NPM1;RPL23;RPS6;RPS3A;YBX1;EEF2;TUBA1B;PSAT1;FTH1;CFL1;PGK1;RPS20;CALM2
Ferulic Acid-1500 mg/kg in CMC-Rat-Liver-1d-up	17/300	4.1951e-10	9.33351e-09	0	0	6.95297	150.128	NQO1;NPM1;RPL10;RPS6;RPS3A;YBX1;EEF2;LDHA;RPS19;PSAT1;FTH1;CFL1;PGK1;P4HB;SLC38A2;CALM2;TPT1
Secobarbital-70 mg/kg in Water-Rat-Liver-5d-dn	17/300	4.1951e-10	9.30722e-09	0	0	6.95297	150.128	HSPA8;JUN;TRAM1;IGFBP3;RPS3A;ATP1B1;ICAM1;C3;LDHA;TUBA1B;PGK1;TXNIP;P4HB;SLC38A2;CALM2;TPT1;TGM2
Modafinil-17.5 mg/kg in Saline-Rat-Liver-5d-dn	16/260	4.23598e-10	9.37151e-09	0	0	7.55073	162.962	TRAM1;RPL10;ATP1B1;EEF2;ICAM1;C3;LDHA;H1F0;TUBA1B;FTH1;FASN;CFL1;PGK1;P4HB;SLC38A2;TPT1
Ketamine-30 mg/kg in Saline-Rat-Heart-5d-up	17/301	4.41534e-10	9.74095e-09	0	0	6.92987	149.275	ABCC3;HSPA8;NPM1;RPL10;STAT1;RPL23;TPM1;RPS3A;RPS19;FTH1;FASN;RPS20;VIM;P4HB;SLC38A2;CALM2;TGM2
Oxfendazole-1500 mg/kg in CMC-Rat-Liver-5d-dn	17/301	4.41534e-10	9.71374e-09	0	0	6.92987	149.275	TRAM1;RPL10;RPL23;RPS3A;YBX1;EEF2;ICAM1;VEGFA;C3;FADS2;LDHA;RPS19;FTH1;FASN;CFL1;PGK1;TPT1
Isoprenaline-15 mg/kg in Saline-Rat-Heart-1d-dn	18/344	4.52109e-10	9.91868e-09	0	0	6.42032	138.147	HSPA8;RPL10;RPL23;TPM1;RPS6;RPS3A;ATP1B1;EEF2;ICAM1;CTGF;VEGFA;LDHA;TUBA1B;PGK1;RPS20;VIM;TPT1;TGM2
Azathioprine-20 mg/kg in Corn Oil-Rat-Bone marrow-3d-dn	17/302	4.64621e-10	1.01649e-08	0	0	6.90692	148.428	RPL10;RPS6;ASNS;RPS3A;EEF2;AKAP12;H1F0;TUBA1B;FTH1;CFL1;LCN2;TXNIP;VIM;P4HB;CALM2;TPT1;RAI14
Bromodichloromethane-430 mg/kg in CMC-Rat-Kidney-3d-up	17/302	4.64621e-10	1.01367e-08	0	0	6.90692	148.428	ITGB1;NQO1;NPM1;RPL10;RPL23;RPS6;ASNS;RPS3A;ATP1B1;VEGFA;RPS19;PLAU;PSAT1;SPP1;TXNIP;RPS20;TPT1
Carmustine-16 mg/kg in Corn Oil-Rat-Bone marrow-1d-dn	17/302	4.64621e-10	1.01087e-08	0	0	6.90692	148.428	HSPA8;TRAM1;NPM1;RPL10;RPL23;RPS6;RPS3A;LDHA;RPS19;CFL1;PGK1;LCN2;TXNIP;RPS20;VIM;CALM2;TPT1
Flurbiprofen-10 mg/kg in CMC-Rat-Kidney-1d-dn	17/302	4.64621e-10	1.00809e-08	0	0	6.90692	148.428	TRAM1;NPM1;RPL10;RPS3A;YBX1;LDHA;H1F0;FTH1;CFL1;PGK1;SPP1;TXNIP;RPS20;P4HB;SLC38A2;CALM2;TPT1
Ibuprofen-263 mg/kg in Corn Oil-Rat-Kidney-1d-up	17/302	4.64621e-10	1.00532e-08	0	0	6.90692	148.428	GPX2;NPM1;RPL10;RPL23;RPS6;VEGFA;LDHA;RPS19;FTH1;PGK1;LCN2;SPP1;TXNIP;RPS20;P4HB;SLC38A2;TPT1
Sodium Arsenite-10 mg/kg in Saline-Rat-Kidney-3d-dn	17/302	4.64621e-10	1.00256e-08	0	0	6.90692	148.428	NPM1;RPL10;RPS6;ATP1B1;EEF2;CTGF;LDHA;H1F0;TUBA1B;PLAU;PSAT1;PGK1;SPP1;P4HB;SLC38A2;CALM2;TGM2
Cortisone-206 mg/kg in CMC-Rat-Liver-5d-dn	17/303	4.8882e-10	1.0519e-08	0	0	6.88412	147.589	JUN;TRAM1;NPM1;RPL23;RPS6;RPS3A;ATP1B1;ICAM1;FADS2;LDHA;RPS19;FTH1;FASN;TXNIP;RPS20;P4HB;SLC38A2
D-Tubocurarine Chloride-0.0033 mg/kg in Saline-Rat-Heart-5d-up	17/303	4.8882e-10	1.04903e-08	0	0	6.88412	147.589	HSPA8;NPM1;RPL10;RPS6;EEF2;CTGF;VEGFA;LDHA;TUBA1B;RPS19;FTH1;CFL1;TXNIP;RPS20;VIM;SLC38A2;TGM2
Nimetazepam-122 mg/kg in CMC-Rat-Liver-5d-dn	17/303	4.8882e-10	1.04618e-08	0	0	6.88412	147.589	HSPA8;JUN;TRAM1;NPM1;RPL23;RPS6;ATP1B1;ICAM1;LDHA;H1F0;FTH1;FASN;TXNIP;RPS20;P4HB;TPT1;TGM2
Allyl Alcohol-16 mg/kg in Saline-Rat-Bone marrow-3d-up	19/391	5.00143e-10	1.06751e-08	0	0	5.96237	127.691	TRAM1;NPM1;RPL23;RPS6;RPS3A;NAP1L1;H1F0;TUBA1B;RPS19;FTH1;CFL1;PGK1;TXNIP;RPS20;VIM;P4HB;SLC38A2;TPT1;RAI14
4-Nitrobenzoic Acid-1470 mg/kg in CMC-Rat-Kidney-3d-up	17/304	5.14178e-10	1.09451e-08	0	0	6.86148	146.756	ITGB1;HSPA8;GPX2;NPM1;RPL10;RPL23;IGFBP3;RPS6;RPS3A;YBX1;ATP1B1;VEGFA;RPS19;SPP1;TXNIP;RPS20;TPT1
Beta-Estradiol-150 mg/kg in Corn Oil-Rat-Liver-3d-up	17/304	5.14178e-10	1.09156e-08	0	0	6.86148	146.756	ABCC3;HSPA8;NQO1;GPX2;NPM1;RPL10;RPS6;RPS3A;EEF2;RPS19;PLAU;FTH1;PSMD3;RPS20;P4HB;SLC38A2;TGM2
Carmustine-16 mg/kg in Corn Oil-Rat-Bone marrow-3d-dn	17/304	5.14178e-10	1.08862e-08	0	0	6.86148	146.756	HSPA8;TRAM1;NPM1;RPL10;RPL23;RPS6;RPS3A;EEF2;LDHA;H1F0;RPS19;CFL1;PGK1;LCN2;TXNIP;VIM;CALM2
Busulfan-500 uM in DMSO-Rat-Primary rat hepatocytes-1d-dn	16/264	5.29759e-10	1.1186e-08	0	0	7.43633	158.83	ITGB1;JUN;GPX2;RPL10;CTGF;C3;TUBA1B;FTH1;CFL1;PGK1;LCN2;RPS20;P4HB;SLC38A2;CALM2;TGM2
Balsalazide-1100 mg/kg in Water-Rat-Liver-5d-up	17/305	5.40747e-10	1.13875e-08	0	0	6.83898	145.931	HSPA8;TRAM1;NPM1;RPL10;RPL23;RPS6;ATP1B1;FADS2;LDHA;H1F0;RPS19;FTH1;FASN;PGK1;P4HB;SLC38A2;CALM2
Carboplatin-6 mg/kg in Saline-Rat-Kidney-5d-up	17/305	5.40747e-10	1.13571e-08	0	0	6.83898	145.931	ITGB1;RPL10;RPL23;RPS6;LDHA;H1F0;RPS19;PLAU;PSAT1;CFL1;SPP1;TXNIP;RPS20;P4HB;SLC38A2;CALM2;TGM2
Clomipramine-7 uM in DMSO-Rat-Primary rat hepatocytes-1d-dn	17/305	5.40747e-10	1.13269e-08	0	0	6.83898	145.931	HSPA8;NQO1;NPM1;RPL10;RPS6;RPS3A;YBX1;VEGFA;C3;LDHA;RPS19;FTH1;CFL1;PGK1;LCN2;RPS20;TPT1
Dexamethasone-300 mg/kg in Corn Oil-Rat-Kidney-1d-up	17/305	5.40747e-10	1.12969e-08	0	0	6.83898	145.931	ITGB1;RPL10;IGFBP3;RPS6;ATP1B1;CTGF;LDHA;PSAT1;FTH1;PSMD3;PGK1;SPP1;TXNIP;RPS20;SLC38A2;TPT1;TGM2
Dibromochloromethane-325 mg/kg in CMC-Rat-Kidney-5d-up	17/305	5.40747e-10	1.1267e-08	0	0	6.83898	145.931	NQO1;NPM1;RPL10;RPL23;IGFBP3;RPS6;ASNS;RPS3A;ATP1B1;FADS2;H1F0;RPS19;PLAU;FTH1;RPS20;TPT1;RAI14
Clozapine-69 uM in DMSO-Rat-Primary rat hepatocytes-1d-up	16/265	5.59877e-10	1.16348e-08	0	0	7.40826	157.821	HSPA8;NPM1;ANXA2;RPL23;RPS6;ASNS;RPS3A;NAP1L1;YBX1;EEF2;LDHA;PSAT1;FTH1;FASN;LCN2;SLC38A2
Dobutamine-43 mg/kg in Saline-Rat-Heart-3d-up	17/306	5.68579e-10	1.17845e-08	0	0	6.81663	145.112	ABCC3;HSPA8;JUN;RPL23;RPS6;RPS3A;YBX1;ATP1B1;CTGF;TUBA1B;RPS19;FASN;TXNIP;RPS20;VIM;P4HB;TPT1
Sildenafil-90 uM in DMSO-Rat-Primary rat hepatocytes-0.67d-up	17/306	5.68579e-10	1.17536e-08	0	0	6.81663	145.112	HSPA8;NPM1;RPL10;RPL23;RPS6;ASNS;RPS3A;EEF2;LDHA;TUBA1B;PSAT1;FASN;PSMD3;LCN2;P4HB;SLC38A2;TPT1
Candesartan-1300 mg/kg in CMC-Rat-Heart-1d-dn	17/307	5.97729e-10	1.23239e-08	0	0	6.79443	144.299	ITGB1;RPL10;RPL23;IGFBP3;TPM1;RPS6;RPS3A;CTGF;LDHA;TUBA1B;RPS19;PGK1;VIM;SLC38A2;CALM2;TPT1;TGM2
Colchicine-0.6 mg/kg in Saline-Rat-Kidney-1d-up	17/307	5.97729e-10	1.22917e-08	0	0	6.79443	144.299	NPM1;RPL10;IGFBP3;RPS6;RPS3A;NAP1L1;YBX1;ATP1B1;LDHA;RPS19;FTH1;CFL1;PGK1;SPP1;RPS20;SLC38A2;CALM2
Furosemide-375 mg/kg in CMC-Rat-Kidney-5d-up	17/307	5.97729e-10	1.22597e-08	0	0	6.79443	144.299	ITGB1;HSPA8;JUN;GPX2;NPM1;RPL23;ATP1B1;VEGFA;LDHA;TUBA1B;LCN2;SPP1;TXNIP;RPS20;VIM;CALM2;TPT1
Hydrocortisone-56 mg/kg in Corn Oil-Rat-Bone marrow-3d-dn	17/307	5.97729e-10	1.22278e-08	0	0	6.79443	144.299	HSPA8;TRAM1;NPM1;RPL10;RPL23;RPS6;RPS3A;AKAP12;LDHA;TUBA1B;RPS19;FTH1;CFL1;RPS20;VIM;CALM2;TPT1
Flunarizine-126 mg/kg in CMC-Rat-Heart-1d-dn	15/228	6.0749e-10	1.23953e-08	0	0	8.07233	171.308	ITGB1;NPM1;RPL10;RPL23;IGFBP3;YBX1;CTGF;LDHA;TUBA1B;RPS19;FTH1;PGK1;P4HB;SLC38A2;CALM2
Vinorelbine-1.5 mg/kg in Saline-Rat-Heart-1d-dn	18/351	6.24536e-10	1.27102e-08	0	0	6.29228	133.359	HSPA8;RPL10;RPL23;TPM1;RPS6;RPS3A;ATP1B1;ICAM1;LDHA;TUBA1B;RPS19;FTH1;PGK1;RPS20;VIM;CALM2;TPT1;TGM2
Ethylene Glycol-3525 mg/kg in Water-Rat-Bone marrow-1d-dn	17/308	6.28253e-10	1.27529e-08	0	0	6.77237	143.493	HSPA8;NPM1;RPL10;RPL23;RPS6;RPS3A;NAP1L1;EEF2;LDHA;H1F0;RPS19;CFL1;PGK1;LCN2;TXNIP;RPS20;TPT1
Hexachloroethane-750 mg/kg in CMC-Rat-Kidney-1d-dn	17/308	6.28253e-10	1.27201e-08	0	0	6.77237	143.493	HSPA8;RPL10;RPL23;RPS6;YBX1;ATP1B1;EEF2;CTGF;H1F0;RPS19;PLAU;FTH1;PGK1;TXNIP;RPS20;TPT1;TGM2
TNF-alpha-0.25 mg/kg in RSA/Saline-Rat-Liver-1d-up	17/308	6.28253e-10	1.26875e-08	0	0	6.77237	143.493	HSPA8;TRAM1;NPM1;RPL10;RPS6;RPS3A;ATP1B1;ICAM1;VEGFA;RPS19;FTH1;LCN2;TXNIP;P4HB;SLC38A2;CALM2;TPT1
Ifosfamide-143 mg/kg in Saline-Rat-Spleen-3d-up	18/352	6.53631e-10	1.31662e-08	0	0	6.2744	132.694	HSPA8;TRAM1;NPM1;RPL10;RPL23;IGFBP3;YBX1;ATP1B1;VEGFA;TUBA1B;RPS19;FTH1;CFL1;TXNIP;RPS20;P4HB;CALM2;RAI14
Clopidogrel-400 mg/kg in Corn Oil-Rat-Bone marrow-0.25d-dn	17/309	6.60212e-10	1.32649e-08	0	0	6.75045	142.694	HSPA8;TRAM1;NPM1;RPL10;RPL23;LDHA;TUBA1B;RPS19;CFL1;PSMD3;PGK1;LCN2;RPS20;VIM;P4HB;CALM2;TPT1
Estriol-313 mg/kg in CMC-Rat-Liver-3d-up	17/309	6.60212e-10	1.32311e-08	0	0	6.75045	142.694	ABCC3;NQO1;JUN;GPX2;NPM1;RPL23;RPS6;RPS3A;EEF2;VEGFA;RPS19;CFL1;RPS20;P4HB;SLC38A2;TPT1;TGM2
Ethanol-3000 mg/kg in Saline-Rat-Liver-5d-dn	17/309	6.60212e-10	1.31975e-08	0	0	6.75045	142.694	HSPA8;JUN;RPL10;RPL23;RPS6;RPS3A;EEF2;VEGFA;C3;FADS2;TUBA1B;RPS19;FTH1;FASN;RPS20;VIM;TPT1
Lead (II) Acetate-600 mg/kg in Saline-Rat-Liver-0.25d-up	17/310	6.93665e-10	1.38312e-08	0	0	6.72868	141.901	HSPA8;NQO1;RPL10;RPL23;RPS6;RPS3A;ATP1B1;ICAM1;FADS2;LDHA;RPS19;PLAU;PSAT1;FTH1;PSMD3;RPS20;SLC38A2
Leflunomide-60 mg/kg in Corn Oil-Rat-Kidney-5d-up	17/310	6.93665e-10	1.37962e-08	0	0	6.72868	141.901	HSPA8;NQO1;GPX2;RPL23;IGFBP3;RPS6;ATP1B1;CTGF;VEGFA;LDHA;TUBA1B;RPS19;PSMD3;LCN2;SPP1;TXNIP;RPS20
Nizatidine-1653 mg/kg in Corn Oil-Rat-Heart-1d-up	17/310	6.93665e-10	1.37615e-08	0	0	6.72868	141.901	HSPA8;NPM1;RPL10;RPS6;ATP1B1;EEF2;LDHA;TUBA1B;RPS19;FTH1;FASN;CFL1;TXNIP;VIM;P4HB;SLC38A2;TPT1
Tenidap-75 mg/kg in Corn Oil-Rat-Kidney-1d-up	17/310	6.93665e-10	1.37269e-08	0	0	6.72868	141.901	ITGB1;HSPA8;NPM1;RPL10;RPL23;IGFBP3;PLOD2;RPS3A;YBX1;ATP1B1;CTGF;LDHA;SPP1;TXNIP;VIM;SLC38A2;TPT1
Diethylstilbestrol-280 mg/kg in Corn Oil-Rat-Liver-3d-up	16/269	6.96802e-10	1.37544e-08	0	0	7.2981	153.877	HSPA8;NQO1;NPM1;RPL10;RPL23;RPS6;ASNS;RPS3A;RPS19;PLAU;FTH1;RPS20;P4HB;TPT1;TGM2;RAI14
Ceramide C2-44 uM in DMSO-Rat-Primary rat hepatocytes-0.67d-up	17/311	7.28678e-10	1.43477e-08	0	0	6.70704	141.115	ITGB1;HSPA8;JUN;GPX2;NPM1;ANXA2;RPS6;ASNS;RPS3A;YBX1;LDHA;TUBA1B;PSMD3;PGK1;LCN2;P4HB;SLC38A2
Tamoxifen-2.5 mg/kg in Corn Oil-Rat-Liver-1d-up	17/311	7.28678e-10	1.43119e-08	0	0	6.70704	141.115	HSPA8;TRAM1;NPM1;RPL10;RPL23;RPS6;RPS3A;EEF2;ICAM1;VEGFA;PSAT1;FTH1;PGK1;TXNIP;RPS20;P4HB;SLC38A2
Emetine-1 mg/kg in Saline-Rat-Heart-5d-dn	16/270	7.35541e-10	1.44107e-08	0	0	7.27107	152.914	RPL10;RPL23;IGFBP3;TPM1;RPS6;RPS3A;YBX1;EEF2;VEGFA;TUBA1B;FTH1;CFL1;PGK1;P4HB;SLC38A2;TPT1
Etoposide-188 mg/kg in Corn Oil-Rat-Heart-3d-dn	16/270	7.35541e-10	1.4375e-08	0	0	7.27107	152.914	HSPA8;RPL23;RPS6;RPS3A;YBX1;CTGF;VEGFA;LDHA;TUBA1B;RPS19;CFL1;RPS20;VIM;SLC38A2;TPT1;TGM2
Rapamycin-60 mg/kg in CMC-Rat-Heart-5d-up	16/270	7.35541e-10	1.43394e-08	0	0	7.27107	152.914	JUN;RPL23;IGFBP3;RPS6;RPS3A;YBX1;ATP1B1;CTGF;VEGFA;TUBA1B;RPS19;PGK1;TXNIP;RPS20;SLC38A2;TPT1
Valproic Acid-850 mg/kg in Water-Rat-Kidney-5d-dn	16/270	7.35541e-10	1.4304e-08	0	0	7.27107	152.914	HSPA8;JUN;RPL23;ATP1B1;CTGF;VEGFA;H1F0;TUBA1B;RPS19;PSAT1;PGK1;SPP1;TXNIP;P4HB;SLC38A2;TGM2
Erythromycin-1500 mg/kg in CMC-Rat-Liver-3d-up	17/312	7.65316e-10	1.48464e-08	0	0	6.68554	140.334	HSPA8;JUN;NPM1;RPL10;RPL23;RPS6;RPS3A;ATP1B1;ICAM1;VEGFA;RPS19;FTH1;RPS20;P4HB;SLC38A2;TPT1;TGM2
Minoxidil-83 mg/kg in CMC-Rat-Heart-5d-up	17/312	7.65316e-10	1.48099e-08	0	0	6.68554	140.334	ABCC3;HSPA8;TRAM1;NPM1;ANXA2;RPL10;RPL23;RPS6;PLOD2;ATP1B1;CTGF;H1F0;TUBA1B;RPS19;RPS20;VIM;SLC38A2
Hydralazine-280 mg/kg in Water-Rat-Heart-3d-dn	17/313	8.03648e-10	1.55136e-08	0	0	6.66418	139.56	ITGB1;HSPA8;RPL10;TPM1;RPS6;RPS3A;YBX1;EEF2;LDHA;TUBA1B;RPS19;FTH1;CFL1;PGK1;P4HB;CALM2;TGM2
Proglumide-1125 mg/kg in CMC-Rat-Liver-1d-dn	17/313	8.03648e-10	1.54756e-08	0	0	6.66418	139.56	HSPA8;TRAM1;RPL23;RPS6;RPS3A;ATP1B1;ICAM1;VEGFA;C3;TUBA1B;RPS19;FASN;CFL1;PGK1;TXNIP;P4HB;CALM2
Doxorubicin-0.65 mg/kg in Saline-Rat-Bone marrow-0.25d-up	17/314	8.43746e-10	1.62082e-08	0	0	6.64296	138.793	TRAM1;RPL10;RPL23;RPS6;LDHA;TUBA1B;RPS19;PSAT1;FTH1;CFL1;PGK1;LCN2;TXNIP;RPS20;VIM;CALM2;TPT1
Valsartan-30 mg/kg in Corn Oil-Rat-Heart-1d-up	17/314	8.43746e-10	1.61687e-08	0	0	6.64296	138.793	HSPA8;JUN;NPM1;RPL23;TPM1;RPS6;RPS3A;YBX1;EEF2;CTGF;RPS19;FTH1;CFL1;PSMD3;TXNIP;VIM;RAI14
6-Mercaptopurine-25 mg/kg in Corn Oil-Rat-Liver-5d-dn	16/273	8.63967e-10	1.6516e-08	0	0	7.19117	150.076	HSPA8;NQO1;RPL10;RPS6;RPS3A;EEF2;ICAM1;VEGFA;C3;LDHA;TUBA1B;PLAU;FTH1;FASN;TPT1;TGM2
Furan-24 mg/kg in Corn Oil-Rat-Heart-3d-dn	17/315	8.85683e-10	1.68902e-08	0	0	6.62187	138.031	NPM1;RPL10;RPL23;IGFBP3;RPS6;RPS3A;ATP1B1;VEGFA;H1F0;RPS19;CFL1;PGK1;RPS20;VIM;SLC38A2;CALM2;TPT1
Azathioprine-160 mg/kg in Corn Oil-Rat-Liver-1d-dn	16/274	9.11162e-10	1.73341e-08	0	0	7.16493	149.147	HSPA8;NQO1;NPM1;RPL10;IGFBP3;RPS3A;EEF2;ICAM1;VEGFA;C3;LDHA;FTH1;FASN;PGK1;P4HB;TPT1
Pirinixic Acid-364 mg/kg in CMC-Rat-Liver-1d-up	17/316	9.29537e-10	1.7641e-08	0	0	6.60092	137.275	HSPA8;RPL23;RPS6;RPS3A;YBX1;EEF2;FADS2;LDHA;TUBA1B;RPS19;FTH1;CFL1;PSMD3;PGK1;RPS20;TPT1;TGM2
Thalidomide-113 mg/kg in CMC-Rat-Kidney-5d-dn	17/316	9.29537e-10	1.75986e-08	0	0	6.60092	137.275	HSPA8;RPL10;RPS6;RPS3A;ATP1B1;EEF2;CTGF;VEGFA;LDHA;PLAU;PSAT1;PGK1;SPP1;RPS20;CALM2;TPT1;TGM2
Ethanol-6000 mg/kg in Saline-Rat-Liver-0.25d-up	16/275	9.60718e-10	1.81454e-08	0	0	7.13887	148.227	HSPA8;NQO1;JUN;RPL23;RPS6;RPS3A;ATP1B1;ICAM1;LDHA;FASN;PGK1;RPS20;P4HB;SLC38A2;CALM2;RAI14
Clindamycin-161 mg/kg in Saline-Rat-Kidney-5d-up	17/317	9.75387e-10	1.83783e-08	0	0	6.58009	136.525	HSPA8;JUN;RPL10;RPL23;RPS3A;YBX1;CTGF;LDHA;H1F0;TUBA1B;RPS19;FTH1;TXNIP;RPS20;P4HB;CALM2;TPT1
Oxcarbazepine-1600 mg/kg in CMC-Rat-Kidney-3d-dn	17/317	9.75387e-10	1.83345e-08	0	0	6.58009	136.525	RPL10;RPL23;RPS6;PLOD2;LDHA;H1F0;TUBA1B;RPS19;PLAU;CFL1;PGK1;SPP1;VIM;SLC38A2;CALM2;TPT1;TGM2
Benoxaprofen-89 mg/kg in CMC-Rat-Liver-1d-up	16/276	1.01274e-09	1.89913e-08	0	0	7.11301	147.315	HSPA8;NQO1;NPM1;RPL23;RPS6;RPS3A;YBX1;ICAM1;C3;FADS2;LDHA;FTH1;PGK1;TXNIP;RPS20;CALM2
Clemastine-2500 mg/kg in CMC-Rat-Heart-5d-up	16/276	1.01274e-09	1.89462e-08	0	0	7.11301	147.315	HSPA8;JUN;ANXA2;RPL23;IGFBP3;RPS6;RPS3A;YBX1;ALDH3A1;RPS19;FTH1;TXNIP;RPS20;VIM;TPT1;TGM2
Rofecoxib-111 uM in DMSO-Rat-Primary rat hepatocytes-1d-up	16/276	1.01274e-09	1.89013e-08	0	0	7.11301	147.315	HSPA8;NPM1;RPL10;STAT1;RPS6;ASNS;RPS3A;YBX1;CTGF;TUBA1B;PSAT1;CFL1;PGK1;RPS20;P4HB;SLC38A2
Chlorpromazine-18 mg/kg in Water-Rat-Liver-0.25d-up	18/362	1.0221e-09	1.90308e-08	0	0	6.10107	126.301	NPM1;RPL23;IGFBP3;RPS6;RPS3A;C3;LDHA;RPS19;PLAU;PSAT1;FTH1;PGK1;TXNIP;RPS20;P4HB;SLC38A2;CALM2;RAI14
Cholecalciferol-8 mg/kg in CMC-Rat-Liver-1d-up	17/318	1.02332e-09	1.90086e-08	0	0	6.5594	135.781	HSPA8;NQO1;RPL10;RPL23;RPS6;RPS3A;C3;FADS2;RPS19;PSAT1;FTH1;CFL1;LCN2;RPS20;VIM;CALM2;TPT1
Cyclosporin A-70 mg/kg in Corn Oil-Rat-Kidney-3d-up	17/318	1.02332e-09	1.89638e-08	0	0	6.5594	135.781	HSPA8;RPL10;RPL23;RPS6;RPS3A;ATP1B1;CTGF;TUBA1B;RPS19;PSMD3;PGK1;SPP1;TXNIP;RPS20;CALM2;TPT1;TGM2
Fluvastatin-5 mg/kg in Corn Oil-Rat-Liver-0.25d-up	17/318	1.02332e-09	1.89193e-08	0	0	6.5594	135.781	HSPA8;TRAM1;NPM1;RPL10;RPL23;RPS6;RPS3A;ATP1B1;LDHA;RPS19;PLAU;FTH1;FASN;LCN2;RPS20;CALM2;TPT1
Kanamycin-225 mg/kg in Saline-Rat-Kidney-3d-up	17/318	1.02332e-09	1.8875e-08	0	0	6.5594	135.781	HSPA8;JUN;GPX2;RPL10;RPS3A;CTGF;VEGFA;H1F0;TUBA1B;CFL1;PGK1;SPP1;TXNIP;RPS20;VIM;TPT1;TGM2
Nadolol-1500 mg/kg in CMC-Rat-Heart-5d-dn	17/318	1.02332e-09	1.88309e-08	0	0	6.5594	135.781	ITGB1;HSPA8;JUN;RPL23;TPM1;RPS6;CTGF;LDHA;TUBA1B;RPS19;PGK1;TXNIP;RPS20;VIM;P4HB;CALM2;TPT1
Tolazamide-1500 mg/kg in CMC-Rat-Heart-1d-dn	17/318	1.02332e-09	1.8787e-08	0	0	6.5594	135.781	HSPA8;RPL10;RPL23;TPM1;RPS6;RPS3A;ATP1B1;CTGF;LDHA;TUBA1B;RPS19;PGK1;VIM;SLC38A2;CALM2;TPT1;TGM2
Verapamil-108 mg/kg in Water-Rat-Heart-1d-up	17/318	1.02332e-09	1.87433e-08	0	0	6.5594	135.781	ITGB1;NPM1;ANXA2;RPL10;TPM1;RPS6;RPS3A;ATP1B1;TUBA1B;RPS19;CFL1;RPS20;VIM;P4HB;TPT1;TGM2;RAI14
Propylene Glycol-2000 mg/kg in Water-Rat-Kidney-3d-dn	14/200	1.03679e-09	1.89461e-08	0	0	8.58896	177.681	HSPA8;RPL10;RPL23;RPS6;RPS3A;YBX1;EEF2;RPS19;FTH1;SPP1;RPS20;VIM;CALM2;TGM2
Indomethacin-12 mg/kg in Water-Rat-Liver-3d-up	16/277	1.06735e-09	1.94593e-08	0	0	7.08733	146.411	HSPA8;TRAM1;NPM1;RPL23;RPS6;RPS3A;ATP1B1;ICAM1;VEGFA;C3;RPS19;LCN2;RPS20;VIM;SLC38A2;TGM2
Omeprazole-415 mg/kg in Corn Oil-Rat-Liver-0.25d-up	16/277	1.06735e-09	1.94144e-08	0	0	7.08733	146.411	ABCC3;HSPA8;NQO1;NPM1;RPL10;RPL23;RPS6;RPS3A;ATP1B1;ICAM1;RPS19;PSAT1;FTH1;PSMD3;RPS20;TPT1
Acrolein-20 mg/kg in Water-Rat-Kidney-1d-up	18/363	1.06797e-09	1.93809e-08	0	0	6.08427	125.686	HSPA8;TRAM1;NPM1;RPL23;RPS6;PLOD2;RPS3A;ATP1B1;VEGFA;RPS19;PLAU;PSAT1;FTH1;PGK1;TXNIP;RPS20;SLC38A2;TPT1
3-Methylcholanthrene-12.5 mg/kg in CMC-Rat-Liver-91d-dn	17/319	1.07341e-09	1.94349e-08	0	0	6.53884	135.043	HSPA8;TRAM1;RPL10;RPL23;RPS6;RPS3A;ATP1B1;EEF2;ICAM1;VEGFA;C3;LDHA;RPS19;PSMD3;RPS20;SLC38A2;TPT1
Betamethasone-79 mg/kg in Corn Oil-Rat-Liver-3d-dn	17/319	1.07341e-09	1.93903e-08	0	0	6.53884	135.043	HSPA8;JUN;TRAM1;RPL10;RPL23;IGFBP3;RPS6;RPS3A;VEGFA;C3;FADS2;H1F0;TUBA1B;RPS19;RPS20;TPT1;TGM2
Ferrocene-330 mg/kg in CMC-Rat-Kidney-3d-dn	17/319	1.07341e-09	1.93459e-08	0	0	6.53884	135.043	TRAM1;RPL10;RPS6;ATP1B1;EEF2;CTGF;LDHA;H1F0;TUBA1B;PLAU;PSAT1;FTH1;PGK1;P4HB;CALM2;TPT1;TGM2
Gentamicin-40 mg/kg in Saline-Rat-Kidney-5d-up	17/319	1.07341e-09	1.93018e-08	0	0	6.53884	135.043	ITGB1;HSPA8;JUN;RPL10;RPS6;RPS3A;LDHA;H1F0;PLAU;FTH1;SPP1;TXNIP;RPS20;P4HB;SLC38A2;CALM2;TPT1
Trihexyphenidyl-588 mg/kg in CMC-Rat-Heart-1d-dn	17/319	1.07341e-09	1.92578e-08	0	0	6.53884	135.043	ITGB1;RPL10;TPM1;RPS3A;CTGF;VEGFA;LDHA;TUBA1B;CFL1;PGK1;RPS20;VIM;P4HB;SLC38A2;CALM2;TPT1;TGM2
Zidovudine-1473 uM in DMSO-Rat-Primary rat hepatocytes-1d-dn	17/319	1.07341e-09	1.9214e-08	0	0	6.53884	135.043	HSPA8;NQO1;NPM1;RPL10;RPS6;RPS3A;YBX1;LDHA;TUBA1B;RPS19;FTH1;CFL1;PGK1;LCN2;RPS20;CALM2;TPT1
Allylamine-75 mg/kg in Water-Rat-Heart-3d-dn	18/364	1.11574e-09	1.99264e-08	0	0	6.06755	125.075	RPL10;TPM1;RPS6;RPS3A;YBX1;VEGFA;LDHA;H1F0;TUBA1B;RPS19;CFL1;PGK1;RPS20;VIM;SLC38A2;CALM2;TPT1;TGM2
Amiodarone-147 mg/kg in CMC-Rat-Kidney-1d-up	16/278	1.12465e-09	2.00401e-08	0	0	7.06184	145.515	NPM1;RPL10;RPL23;RPS6;RPS3A;EEF2;LDHA;RPS19;FTH1;PGK1;SPP1;TXNIP;P4HB;SLC38A2;CALM2;TPT1
Mitomycin C-1.7 mg/kg in Saline-Rat-Bone marrow-3d-dn	16/278	1.12465e-09	1.99949e-08	0	0	7.06184	145.515	NPM1;RPL10;RPL23;RPS6;RPS3A;EEF2;LDHA;H1F0;TUBA1B;CFL1;PGK1;LCN2;TXNIP;RPS20;CALM2;TPT1
Carmustine-16 mg/kg in Corn Oil-Rat-Liver-5d-up	17/320	1.12576e-09	1.99695e-08	0	0	6.5184	134.31	ABCC3;HSPA8;TRAM1;NPM1;RPL10;RPL23;RPS6;ATP1B1;C3;TUBA1B;PLAU;CFL1;LCN2;RPS20;VIM;CALM2;TPT1
Dexamethasone-300 mg/kg in Corn Oil-Rat-Kidney-3d-up	17/320	1.12576e-09	1.99246e-08	0	0	6.5184	134.31	ITGB1;NPM1;RPL10;RPL23;IGFBP3;RPS6;ATP1B1;CTGF;LDHA;H1F0;RPS19;LCN2;SPP1;TXNIP;RPS20;TPT1;TGM2
Dobutamine-43 mg/kg in Saline-Rat-Heart-1d-up	17/320	1.12576e-09	1.988e-08	0	0	6.5184	134.31	ITGB1;NPM1;RPL23;PLOD2;YBX1;ATP1B1;LDHA;TUBA1B;RPS19;FTH1;CFL1;PGK1;SPP1;RPS20;VIM;P4HB;TPT1
Econazole-43 mg/kg in Corn Oil-Rat-Liver-3d-dn	17/320	1.12576e-09	1.98355e-08	0	0	6.5184	134.31	HSPA8;JUN;RPL10;RPL23;RPS6;RPS3A;ATP1B1;EEF2;VEGFA;C3;FADS2;RPS19;FTH1;FASN;PGK1;CALM2;TPT1
Racepinephrine-0.77 mg/kg in Saline-Rat-Heart-3d-dn	17/320	1.12576e-09	1.97912e-08	0	0	6.5184	134.31	RPL10;RPL23;IGFBP3;TPM1;RPS6;RPS3A;YBX1;TUBA1B;RPS19;FTH1;PGK1;TXNIP;RPS20;P4HB;SLC38A2;CALM2;TPT1
Ticlopidine-223 mg/kg in CMC-Rat-Liver-5d-dn	17/320	1.12576e-09	1.97471e-08	0	0	6.5184	134.31	HSPA8;JUN;RPL23;IGFBP3;RPS3A;ATP1B1;ICAM1;VEGFA;LDHA;H1F0;FASN;PGK1;TXNIP;VIM;SLC38A2;TPT1;TGM2
Erythromycin-1500 mg/kg in CMC-Rat-Kidney-3d-dn	17/321	1.18045e-09	2.06605e-08	0	0	6.4981	133.584	ITGB1;TRAM1;RPL10;RPL23;RPS6;PLOD2;ATP1B1;LDHA;H1F0;TUBA1B;RPS19;PGK1;SPP1;RPS20;VIM;CALM2;TGM2
Sulindac-132 mg/kg in Corn Oil-Rat-Liver-0.25d-up	16/279	1.18476e-09	2.069e-08	0	0	7.03652	144.627	HSPA8;NQO1;RPL10;RPL23;RPS6;RPS3A;ATP1B1;EEF2;C3;LDHA;RPS19;PLAU;PGK1;LCN2;RPS20;SLC38A2
Capsaicin-35 mg/kg in CMC-Rat-Liver-3d-dn	17/322	1.23759e-09	2.15647e-08	0	0	6.47792	132.863	HSPA8;NQO1;TRAM1;RPL10;RPS6;EEF2;ICAM1;C3;LDHA;RPS19;FTH1;FASN;PGK1;RPS20;P4HB;CALM2;TPT1
Clozapine-95 mg/kg in CMC-Rat-Heart-5d-dn	17/322	1.23759e-09	2.15171e-08	0	0	6.47792	132.863	ANXA2;RPL10;IGFBP3;EEF2;CTGF;LDHA;H1F0;TUBA1B;FTH1;CFL1;PSMD3;PGK1;TXNIP;RPS20;VIM;TPT1;TGM2
Ketoprofen-4 mg/kg in Corn Oil-Rat-Kidney-0.25d-up	17/322	1.23759e-09	2.14697e-08	0	0	6.47792	132.863	NPM1;RPL10;RPL23;RPS6;RPS3A;YBX1;EEF2;LDHA;RPS19;FTH1;CFL1;SPP1;TXNIP;RPS20;VIM;TPT1;RAI14
Mifepristone-300 mg/kg in Corn Oil-Rat-Liver-1d-up	17/322	1.23759e-09	2.14225e-08	0	0	6.47792	132.863	HSPA8;NQO1;GPX2;NPM1;RPL23;RPS6;RPS3A;NAP1L1;EEF2;TUBA1B;RPS19;FTH1;CFL1;PSMD3;RPS20;TPT1;RAI14
Zopiclone-414 mg/kg in Water-Rat-Liver-3d-up	17/322	1.23759e-09	2.13756e-08	0	0	6.47792	132.863	ABCC3;HSPA8;NQO1;TRAM1;RPL23;RPS6;RPS3A;ICAM1;C3;FADS2;TUBA1B;RPS19;PSAT1;FTH1;PSMD3;PGK1;RPS20
Angiotensin II Human-0.72 mg/kg in Saline-Rat-Heart-5d-dn	16/280	1.24782e-09	2.15052e-08	0	0	7.01139	143.747	HSPA8;IGFBP3;TPM1;RPS6;RPS3A;YBX1;EEF2;VEGFA;LDHA;TUBA1B;FTH1;CFL1;TXNIP;VIM;SLC38A2;TPT1
Ethinylestradiol-10 mg/kg in Corn Oil-Rat-Liver-5d-up	16/280	1.24782e-09	2.14582e-08	0	0	7.01139	143.747	HSPA8;NQO1;TRAM1;NPM1;RPL10;RPL23;RPS6;ASNS;RPS3A;VEGFA;RPS19;PLAU;PSMD3;RPS20;P4HB;RAI14
Terazosin-657 mg/kg in Water-Rat-Heart-1d-up	16/280	1.24782e-09	2.14115e-08	0	0	7.01139	143.747	ITGB1;HSPA8;NPM1;RPL10;TPM1;RPS6;VEGFA;LDHA;RPS19;CFL1;PGK1;RPS20;VIM;P4HB;CALM2;TPT1
Trimethadione-535 mg/kg in Water-Rat-Kidney-5d-dn	15/241	1.30784e-09	2.23925e-08	0	0	7.63689	156.212	HSPA8;JUN;RPL10;RPL23;IGFBP3;RPS6;RPS3A;ATP1B1;EEF2;CTGF;VEGFA;RPS19;TXNIP;RPS20;TGM2
Enalapril-1500 mg/kg in CMC-Rat-Kidney-1d-up	16/281	1.31396e-09	2.24484e-08	0	0	6.98644	142.874	HSPA8;GPX2;RPL23;RPS6;RPS3A;ATP1B1;EEF2;LDHA;RPS19;LCN2;SPP1;TXNIP;RPS20;VIM;TPT1;TGM2
Pralidoxime Chloride-48 mg/kg in Saline-Rat-Liver-5d-up	16/281	1.31396e-09	2.23998e-08	0	0	6.98644	142.874	ITGB1;NQO1;NPM1;RPL10;STAT1;ATP1B1;ICAM1;FTH1;CFL1;LCN2;TXNIP;VIM;P4HB;CALM2;TPT1;TGM2
Promethazine-2.3 mg/kg in Saline-Rat-Liver-0.25d-up	16/281	1.31396e-09	2.23514e-08	0	0	6.98644	142.874	HSPA8;TRAM1;NPM1;RPS6;RPS3A;YBX1;EEF2;ICAM1;VEGFA;C3;FADS2;PLAU;FTH1;CFL1;P4HB;TPT1
Valproic Acid-235 mg/kg in Water-Rat-Liver-5d-dn	16/281	1.31396e-09	2.23033e-08	0	0	6.98644	142.874	TRAM1;RPL10;RPL23;RPS6;RPS3A;EEF2;ICAM1;VEGFA;LDHA;RPS19;FASN;CFL1;PGK1;RPS20;P4HB;CALM2
Spironolactone-300 mg/kg in CMC-Rat-Kidney-5d-dn	17/324	1.35959e-09	2.30282e-08	0	0	6.43793	131.437	GPX2;YBX1;ATP1B1;CTGF;LDHA;H1F0;TUBA1B;RPS19;PLAU;CFL1;PGK1;SPP1;TXNIP;VIM;SLC38A2;CALM2;TPT1
Thalidomide-113 mg/kg in CMC-Rat-Kidney-3d-dn	17/324	1.35959e-09	2.29788e-08	0	0	6.43793	131.437	TRAM1;RPL10;RPS6;ATP1B1;CTGF;LDHA;H1F0;TUBA1B;PLAU;PSAT1;FTH1;PGK1;SPP1;RPS20;CALM2;TPT1;TGM2
Zidovudine-1473 uM in DMSO-Rat-Primary rat hepatocytes-0.67d-up	17/324	1.35959e-09	2.29296e-08	0	0	6.43793	131.437	NPM1;RPL23;RPS6;ASNS;CTGF;VEGFA;C3;LDHA;TUBA1B;CFL1;PGK1;RPS20;P4HB;SLC38A2;CALM2;TPT1;TGM2
Benzothiazyl Disulfide-2600 mg/kg in Corn Oil-Rat-Liver-3d-up	16/282	1.3833e-09	2.32796e-08	0	0	6.96167	142.01	HSPA8;NQO1;JUN;NPM1;RPS6;RPS3A;ATP1B1;EEF2;LDHA;FTH1;FASN;CFL1;PSMD3;PGK1;LCN2;SLC38A2
Cyclopropane Carboxylic Acid-375 mg/kg in Water-Rat-Liver-1d-dn	17/325	1.42466e-09	2.39246e-08	0	0	6.41812	130.733	TRAM1;RPL10;RPL23;RPS6;RPS3A;EEF2;VEGFA;C3;FADS2;LDHA;H1F0;RPS19;FTH1;FASN;PGK1;RPS20;TPT1
Troglitazone-1200 mg/kg in Corn Oil-Rat-Liver-1d-dn	17/325	1.42466e-09	2.38737e-08	0	0	6.41812	130.733	NQO1;TRAM1;RPL23;RPS6;YBX1;EEF2;IFIT2;C3;LDHA;TUBA1B;RPS19;FTH1;PGK1;RPS20;P4HB;SLC38A2;CALM2
Prochlorperazine-85 mg/kg in CMC-Rat-Heart-5d-up	16/283	1.45599e-09	2.43468e-08	0	0	6.93707	141.153	HSPA8;JUN;TRAM1;NPM1;ANXA2;RPL10;RPL23;TPM1;RPS6;ATP1B1;CTGF;TUBA1B;RPS19;TXNIP;P4HB;SLC38A2
Norethindrone-75 mg/kg in Corn Oil-Rat-Liver-1d-up	15/243	1.46535e-09	2.44515e-08	0	0	7.57404	154.065	HSPA8;NPM1;RPL10;RPL23;RPS6;RPS3A;YBX1;ICAM1;VEGFA;C3;RPS19;PSAT1;FTH1;PGK1;RPS20
3-Chloroaniline-200 mg/kg in CMC-Rat-Kidney-1d-dn	17/326	1.4926e-09	2.48535e-08	0	0	6.39843	130.034	ITGB1;NPM1;RPL10;RPL23;RPS6;YBX1;ATP1B1;CTGF;H1F0;PSAT1;FTH1;SPP1;TXNIP;RPS20;CALM2;TPT1;TGM2
4-Chloroaniline-75 mg/kg in CMC-Rat-Kidney-3d-up	17/326	1.4926e-09	2.48011e-08	0	0	6.39843	130.034	ITGB1;HSPA8;GPX2;RPL23;RPS3A;ATP1B1;CTGF;LDHA;RPS19;FTH1;LCN2;SPP1;TXNIP;RPS20;ITGAV;P4HB;TPT1
Cytarabine-487 mg/kg in Saline-Rat-Bone marrow-1d-up	17/326	1.4926e-09	2.47489e-08	0	0	6.39843	130.034	HSPA8;NPM1;RPL10;RPL23;RPS6;RPS3A;NAP1L1;YBX1;LDHA;TUBA1B;RPS19;PSAT1;CFL1;PSMD3;RPS20;P4HB;TPT1
Diphenhydramine-10.9 mg/kg in Water-Rat-Heart-5d-up	17/326	1.4926e-09	2.46969e-08	0	0	6.39843	130.034	HSPA8;JUN;TPM1;RPS6;RPS3A;YBX1;CTGF;VEGFA;LDHA;TUBA1B;FTH1;PGK1;TXNIP;VIM;P4HB;SLC38A2;CALM2
Ketoprofen-4 mg/kg in Corn Oil-Rat-Kidney-3d-up	18/371	1.50962e-09	2.49261e-08	0	0	5.95307	120.915	NPM1;RPL10;RPL23;RPS6;RPS3A;CTGF;VEGFA;LDHA;H1F0;RPS19;FTH1;CFL1;SPP1;TXNIP;RPS20;VIM;CALM2;TPT1
Acarbose-2000 mg/kg in Water-Rat-Kidney-5d-up	16/284	1.53217e-09	2.52456e-08	0	0	6.91264	140.303	GPX2;RPL23;YBX1;ATP1B1;EEF2;CTGF;LDHA;H1F0;TUBA1B;FTH1;LCN2;SPP1;TXNIP;VIM;CALM2;TPT1
Cyclopropane Carboxylic Acid-375 mg/kg in Water-Rat-Liver-5d-up	16/284	1.53217e-09	2.51929e-08	0	0	6.91264	140.303	NPM1;RPL10;RPL23;RPS6;RPS3A;ATP1B1;ICAM1;H1F0;RPS19;FTH1;LCN2;TXNIP;RPS20;P4HB;SLC38A2;TPT1
Doxapram-2 mg/kg in Saline-Rat-Liver-3d-up	16/284	1.53217e-09	2.51404e-08	0	0	6.91264	140.303	HSPA8;NQO1;RPL10;STAT1;RPS6;ICAM1;C3;RPS19;FTH1;CFL1;PGK1;LCN2;RPS20;VIM;P4HB;CALM2
Clomipramine-115 mg/kg in Water-Rat-Heart-5d-dn	17/327	1.56351e-09	2.56013e-08	0	0	6.37887	129.34	HSPA8;RPL23;TPM1;RPS6;RPS3A;CTGF;VEGFA;LDHA;TUBA1B;RPS19;CFL1;PGK1;RPS20;SLC38A2;CALM2;TPT1;TGM2
Colistin-121 mg/kg in Water-Rat-Liver-5d-dn	17/327	1.56351e-09	2.55482e-08	0	0	6.37887	129.34	HSPA8;TRAM1;NPM1;RPL23;EEF2;ICAM1;C3;FADS2;LDHA;RPS19;FASN;CFL1;PSMD3;RPS20;P4HB;TPT1;RAI14
Dipyrone-1636 mg/kg in Water-Rat-Liver-1d-up	17/327	1.56351e-09	2.54953e-08	0	0	6.37887	129.34	ABCC3;HSPA8;NQO1;GPX2;NPM1;RPL10;RPL23;RPS6;RPS3A;EEF2;RPS19;PSAT1;FTH1;PSMD3;PGK1;RPS20;SLC38A2
123-Trichloropropane-108 mg/kg in CMC-Rat-Kidney-3d-up	16/285	1.61201e-09	2.62318e-08	0	0	6.88839	139.461	HSPA8;NQO1;GPX2;NPM1;RPL23;RPS3A;NAP1L1;VEGFA;LDHA;RPS19;FTH1;PSMD3;SPP1;P4HB;TPT1;RAI14
Acetaminophen-972 mg/kg in Corn Oil-Rat-Liver-5d-up	16/285	1.61201e-09	2.61777e-08	0	0	6.88839	139.461	ABCC3;NQO1;NPM1;RPL23;RPS6;RPS3A;YBX1;EEF2;RPS19;PSAT1;CFL1;PSMD3;PGK1;RPS20;P4HB;TPT1
Chlormadinone Acetate-2000 mg/kg in CMC-Rat-Kidney-1d-dn	16/285	1.61201e-09	2.61238e-08	0	0	6.88839	139.461	ITGB1;NQO1;YBX1;ATP1B1;EEF2;CTGF;H1F0;TUBA1B;PLAU;PSAT1;CFL1;PGK1;SPP1;P4HB;SLC38A2;TPT1
Fluoxetine-52 mg/kg in CMC-Rat-Kidney-1d-up	16/285	1.61201e-09	2.60702e-08	0	0	6.88839	139.461	TRAM1;NPM1;RPL10;RPL23;RPS6;LDHA;H1F0;RPS19;FTH1;PGK1;SPP1;TXNIP;P4HB;SLC38A2;CALM2;TPT1
Sulfathiazole-2629 mg/kg in Water-Rat-Kidney-3d-dn	16/285	1.61201e-09	2.60168e-08	0	0	6.88839	139.461	HSPA8;RPL10;RPL23;RPS6;YBX1;CTGF;VEGFA;H1F0;TUBA1B;RPS19;CFL1;SPP1;RPS20;VIM;CALM2;TGM2
Bromisovalum-250 mg/kg in Corn Oil-Rat-Kidney-1d-dn	17/328	1.63752e-09	2.63744e-08	0	0	6.35942	128.652	HSPA8;RPL10;RPL23;RPS6;RPS3A;ATP1B1;VEGFA;LDHA;RPS19;PSAT1;FTH1;PGK1;SPP1;RPS20;CALM2;TPT1;TGM2
Chlorambucil-0.6 mg/kg in Corn Oil-Rat-Liver-5d-dn	17/328	1.63752e-09	2.63206e-08	0	0	6.35942	128.652	TRAM1;RPL10;RPL23;RPS3A;YBX1;EEF2;ICAM1;VEGFA;C3;FADS2;FTH1;FASN;CFL1;PGK1;RPS20;CALM2;TPT1
Phenylhydrazine-78 mg/kg in Water-Rat-Liver-0.25d-up	17/328	1.63752e-09	2.6267e-08	0	0	6.35942	128.652	HSPA8;NQO1;RPL10;RPL23;RPS6;YBX1;ATP1B1;EEF2;ICAM1;C3;RPS19;CFL1;PSMD3;PGK1;RPS20;P4HB;SLC38A2
Rifampin-125 uM in DMSO-Rat-Primary rat hepatocytes-1d-up	15/245	1.64006e-09	2.62543e-08	0	0	7.51221	151.961	HSPA8;NPM1;RPL23;ASNS;RPS3A;LOXL2;VEGFA;TUBA1B;PSAT1;FASN;CFL1;PGK1;RPS20;ITGAV;SLC38A2
Bis(2-Ethylhexyl)Phthalate-1000 mg/kg in Corn Oil-Rat-Liver-5d-dn	16/286	1.69565e-09	2.70891e-08	0	0	6.8643	138.626	HSPA8;NQO1;TRAM1;NPM1;RPL23;IGFBP3;RPS6;RPS3A;VEGFA;C3;FTH1;FASN;PGK1;RPS20;P4HB;CALM2
NN-Dimethylformamide-700 mg/kg in Saline-Rat-Liver-0.25d-up	16/286	1.69565e-09	2.70343e-08	0	0	6.8643	138.626	HSPA8;NQO1;NPM1;RPL10;RPL23;RPS6;RPS3A;ICAM1;VEGFA;LDHA;RPS19;PLAU;FTH1;SLC38A2;CALM2;TPT1
Streptomycin-120 mg/kg in Saline-Rat-Bone marrow-5d-up	17/329	1.71474e-09	2.72834e-08	0	0	6.34009	127.968	NPM1;RPL10;RPL23;RPS6;RPS3A;LDHA;TUBA1B;RPS19;FTH1;CFL1;PGK1;LCN2;TXNIP;RPS20;VIM;CALM2;TPT1
Lead (II) Acetate-200 mg/kg in Saline-Rat-Liver-1d-dn	16/287	1.78326e-09	2.83165e-08	0	0	6.84038	137.798	TRAM1;RPL10;RPL23;RPS6;RPS3A;YBX1;C3;LDHA;RPS19;PLAU;FTH1;FASN;PGK1;RPS20;P4HB;TPT1
Phenothiazine-386 mg/kg in Corn Oil-Rat-Liver-1d-up	16/287	1.78326e-09	2.82595e-08	0	0	6.84038	137.798	ABCC3;HSPA8;NQO1;NPM1;RPL23;RPS6;ASNS;EEF2;RPS19;PLAU;PSAT1;FTH1;PSMD3;LCN2;RPS20;P4HB
Nizatidine-1653 mg/kg in Corn Oil-Rat-Heart-3d-up	17/330	1.79531e-09	2.83933e-08	0	0	6.32088	127.29	ITGB1;HSPA8;ANXA2;RPL10;TPM1;YBX1;EEF2;CTGF;VEGFA;AKAP12;TUBA1B;FTH1;CFL1;TXNIP;RPS20;P4HB;TPT1
Fluphenazine-45 uM in DMSO-Rat-Primary rat hepatocytes-1d-up	15/247	1.83366e-09	2.89417e-08	0	0	7.45138	149.899	HSPA8;NPM1;RPL10;RPL23;RPS6;RPS3A;NAP1L1;YBX1;EEF2;H1F0;TUBA1B;FTH1;CFL1;PGK1;LCN2
Pentoxifylline-1170 mg/kg in CMC-Rat-Heart-3d-up	16/288	1.87502e-09	2.95353e-08	0	0	6.81663	136.978	JUN;NPM1;RPL10;TPM1;RPS3A;YBX1;EEF2;CTGF;VEGFA;LDHA;FTH1;CFL1;PSMD3;TXNIP;TPT1;TGM2
Rofecoxib-775 mg/kg in Corn Oil-Rat-Heart-5d-dn	16/288	1.87502e-09	2.94764e-08	0	0	6.81663	136.978	JUN;RPL10;TPM1;RPS6;RPS3A;IFIT2;CTGF;VEGFA;TUBA1B;CFL1;TXNIP;VIM;P4HB;SLC38A2;CALM2;TGM2
Clozapine-95 mg/kg in CMC-Rat-Heart-1d-dn	17/332	1.96702e-09	3.0861e-08	0	0	6.2828	125.95	NPM1;RPL10;IGFBP3;RPS6;RPS3A;YBX1;EEF2;CTGF;LDHA;RPS19;FASN;CFL1;PSMD3;TXNIP;RPS20;VIM;TGM2
Carboplatin-14 mg/kg in Saline-Rat-Liver-1d-dn	16/289	1.9711e-09	3.08635e-08	0	0	6.79305	136.164	HSPA8;TRAM1;NPM1;RPL10;RPL23;RPS6;RPS3A;EEF2;C3;FADS2;LDHA;RPS19;FTH1;FASN;CALM2;TPT1
Gliclazide-1500 mg/kg in CMC-Rat-Kidney-1d-dn	16/289	1.9711e-09	3.08023e-08	0	0	6.79305	136.164	JUN;TRAM1;RPS6;RPS3A;ATP1B1;LDHA;H1F0;RPS19;PLAU;PSAT1;PGK1;TXNIP;VIM;SLC38A2;CALM2;TGM2
Leflunomide-30 mg/kg in Corn Oil-Rat-Bone marrow-1d-dn	16/289	1.9711e-09	3.07413e-08	0	0	6.79305	136.164	HSPA8;NPM1;RPL10;RPL23;RPS6;RPS3A;EEF2;LDHA;TUBA1B;CFL1;PGK1;TXNIP;RPS20;VIM;SLC38A2;CALM2
Nateglinide-625 mg/kg in CMC-Rat-Kidney-3d-dn	16/289	1.9711e-09	3.06805e-08	0	0	6.79305	136.164	ITGB1;TRAM1;NPM1;RPL10;RPL23;RPS6;ATP1B1;LDHA;PLAU;FTH1;PGK1;SPP1;RPS20;SLC38A2;CALM2;TGM2
3-Acetamidophenol-700 mg/kg in Corn Oil-Rat-Kidney-5d-dn	17/333	2.05843e-09	3.19768e-08	0	0	6.26393	125.287	HSPA8;JUN;RPL10;RPL23;RPS6;RPS3A;ATP1B1;LDHA;RPS19;PSAT1;PGK1;SPP1;RPS20;P4HB;SLC38A2;CALM2;TPT1
Temafloxacin-1000 mg/kg in CMC-Rat-Kidney-5d-up	17/333	2.05843e-09	3.19138e-08	0	0	6.26393	125.287	HSPA8;TRAM1;NPM1;RPL10;RPL23;IGFBP3;RPS6;RPS3A;ATP1B1;EEF2;PLAU;FTH1;PGK1;SPP1;P4HB;SLC38A2;TPT1
Bromhexine-1200 mg/kg in CMC-Rat-Liver-5d-up	16/290	2.07168e-09	3.2056e-08	0	0	6.76962	135.358	ABCC3;NQO1;JUN;TRAM1;GPX2;RPL23;RPS6;RPS3A;ICAM1;FADS2;RPS19;FTH1;FASN;RPS20;P4HB;CALM2
Galantamine-110 mg/kg in CMC-Rat-Heart-1d-dn	16/290	2.07168e-09	3.19932e-08	0	0	6.76962	135.358	ITGB1;RPL23;IGFBP3;TPM1;RPS3A;YBX1;EEF2;CTGF;VEGFA;LDHA;CFL1;RPS20;SLC38A2;CALM2;TPT1;TGM2
Hydroquinone-800 mg/kg in CMC-Rat-Kidney-5d-dn	16/290	2.07168e-09	3.19306e-08	0	0	6.76962	135.358	JUN;RPL10;IGFBP3;RPS6;ATP1B1;EEF2;CTGF;VEGFA;LDHA;TUBA1B;RPS19;PGK1;TXNIP;RPS20;CALM2;TGM2
Lamotrigine-26 mg/kg in CMC-Rat-Kidney-3d-dn	16/290	2.07168e-09	3.18682e-08	0	0	6.76962	135.358	ITGB1;TRAM1;NPM1;RPL10;RPL23;RPS6;PLOD2;CTGF;LDHA;H1F0;RPS19;PLAU;PGK1;SPP1;RPS20;CALM2
NN-Dimethylformamide-1400 mg/kg in Saline-Rat-Bone marrow-3d-up	18/379	2.11524e-09	3.24749e-08	0	0	5.82741	116.397	HSPA8;TRAM1;NPM1;RPL10;RPL23;RPS6;RPS3A;LDHA;H1F0;TUBA1B;RPS19;CFL1;PGK1;TXNIP;RPS20;VIM;P4HB;CALM2
Sildenafil-420 mg/kg in Water-Rat-Liver-0.25d-up	18/379	2.11524e-09	3.24118e-08	0	0	5.82741	116.397	HSPA8;NQO1;TRAM1;NPM1;RPL10;RPS6;ICAM1;LDHA;RPS19;PLAU;PSAT1;PSMD3;PGK1;TXNIP;RPS20;P4HB;SLC38A2;TPT1
Epinephrine-0.0375 mg/kg in Saline-Rat-Heart-1d-dn	15/250	2.16351e-09	3.3087e-08	0	0	7.36196	146.882	HSPA8;JUN;RPL23;TPM1;RPS3A;ATP1B1;ICAM1;CTGF;VEGFA;CFL1;RPS20;VIM;SLC38A2;TPT1;TGM2
Bleomycin A2-12 mg/kg in Saline-Rat-Bone marrow-0.25d-up	16/291	2.17695e-09	3.3228e-08	0	0	6.74636	134.558	TRAM1;NPM1;RPL10;RPS6;AKAP12;LDHA;TUBA1B;RPS19;FTH1;CFL1;PGK1;RPS20;VIM;SLC38A2;CALM2;TPT1
Cisplatin-2 mg/kg in Saline-Rat-Liver-1d-dn	16/291	2.17695e-09	3.31638e-08	0	0	6.74636	134.558	HSPA8;JUN;RPL10;RPL23;RPS3A;ATP1B1;ICAM1;FADS2;LDHA;H1F0;RPS19;FTH1;FASN;RPS20;SLC38A2;TPT1
Etodolac-24 mg/kg in CMC-Rat-Liver-1d-up	16/291	2.17695e-09	3.30997e-08	0	0	6.74636	134.558	RPL10;IGFBP3;RPS3A;YBX1;EEF2;C3;LDHA;H1F0;TUBA1B;RPS19;FTH1;CFL1;PSMD3;PGK1;CALM2;TGM2
Neostigmine Bromide-11 mg/kg in Water-Rat-Liver-0.25d-up	17/335	2.25312e-09	3.41918e-08	0	0	6.22654	123.976	NQO1;TRAM1;RPL10;RPL23;RPS6;ATP1B1;EEF2;FADS2;RPS19;FTH1;CFL1;PGK1;RPS20;P4HB;SLC38A2;CALM2;TGM2
Olanzapine-23 mg/kg in CMC-Rat-Liver-3d-up	17/335	2.25312e-09	3.41261e-08	0	0	6.22654	123.976	HSPA8;NQO1;JUN;NPM1;RPL10;RPS3A;ATP1B1;ICAM1;LDHA;RPS19;FTH1;FASN;SLC38A2;CALM2;TPT1;TGM2;RAI14
Ketoconazole-114 mg/kg in Corn Oil-Rat-Liver-3d-dn	16/292	2.28712e-09	3.45746e-08	0	0	6.72325	133.766	JUN;TRAM1;RPL10;RPL23;RPS6;RPS3A;C3;FADS2;LDHA;H1F0;RPS19;PGK1;RPS20;CALM2;TPT1;TGM2
Nimesulide-30 mg/kg in Corn Oil-Rat-Kidney-3d-up	16/292	2.28712e-09	3.45083e-08	0	0	6.72325	133.766	ITGB1;HSPA8;NPM1;RPL10;RPL23;PLOD2;RPS3A;YBX1;ATP1B1;EEF2;VEGFA;LDHA;FTH1;TXNIP;SLC38A2;CALM2
Valproic Acid-1500 mg/kg in Water-Rat-Liver-1d-up	16/292	2.28712e-09	3.44424e-08	0	0	6.72325	133.766	HSPA8;RPL10;RPL23;RPS6;RPS3A;YBX1;ATP1B1;EEF2;LDHA;RPS19;PSAT1;FTH1;CFL1;RPS20;TPT1;TGM2
4-Octylphenol-700 mg/kg in Corn Oil-Rat-Kidney-5d-up	16/293	2.40239e-09	3.61092e-08	0	0	6.70031	132.98	HSPA8;GPX2;RPL10;RPL23;NAP1L1;YBX1;VEGFA;RPS19;PLAU;PSAT1;SPP1;TXNIP;RPS20;P4HB;TPT1;RAI14
Amoxapine-313 mg/kg in CMC-Rat-Heart-1d-dn	16/293	2.40239e-09	3.60404e-08	0	0	6.70031	132.98	RPL23;IGFBP3;TPM1;RPS6;RPS3A;ATP1B1;CTGF;LDHA;TUBA1B;RPS19;CFL1;VIM;P4HB;SLC38A2;CALM2;TPT1
Ethambutol-998 mg/kg in CMC-Rat-Kidney-5d-up	16/293	2.40239e-09	3.59719e-08	0	0	6.70031	132.98	ITGB1;HSPA8;TRAM1;NPM1;RPL10;RPL23;IGFBP3;RPS6;YBX1;ATP1B1;RPS19;PGK1;SPP1;P4HB;CALM2;TPT1
Flavoxate-1255 mg/kg in CMC-Rat-Heart-5d-up	16/293	2.40239e-09	3.59036e-08	0	0	6.70031	132.98	HSPA8;NQO1;JUN;NPM1;RPL23;IGFBP3;TPM1;RPS6;RPS3A;YBX1;VEGFA;H1F0;FTH1;TXNIP;SLC38A2;TPT1
Isoeugenol-1560 mg/kg in CMC-Rat-Kidney-1d-up	16/293	2.40239e-09	3.58356e-08	0	0	6.70031	132.98	HSPA8;NQO1;JUN;TRAM1;GPX2;RPL23;IGFBP3;RPS3A;NAP1L1;ATP1B1;PLAU;FTH1;PSMD3;TXNIP;P4HB;RAI14
Mitoxantrone-2 mg/kg in Saline-Rat-Heart-5d-up	16/293	2.40239e-09	3.57679e-08	0	0	6.70031	132.98	NPM1;RPL23;IGFBP3;RPS6;RPS3A;YBX1;CTGF;VEGFA;AKAP12;RPS19;FTH1;PGK1;RPS20;VIM;TPT1;TGM2
Zidovudine-14800 uM in DMSO-Rat-Primary rat hepatocytes-0.67d-up	16/293	2.40239e-09	3.57004e-08	0	0	6.70031	132.98	NPM1;RPL10;RPS6;ASNS;RPS3A;YBX1;ATP1B1;VEGFA;LDHA;RPS19;PSAT1;RPS20;SLC38A2;CALM2;TPT1;TGM2
Prednisolone-184 mg/kg in Water-Rat-Kidney-1d-up	18/383	2.4959e-09	3.70202e-08	0	0	5.76655	114.227	ITGB1;TRAM1;NPM1;RPL10;STAT1;RPL23;IGFBP3;RPS6;IFIT2;LDHA;H1F0;PLAU;PSAT1;PGK1;SPP1;SLC38A2;TPT1;TGM2
Cholecalciferol-8 mg/kg in CMC-Rat-Liver-3d-up	16/294	2.52297e-09	3.73513e-08	0	0	6.67752	132.2	HSPA8;NQO1;TRAM1;NPM1;RPL10;RPS6;RPS3A;ATP1B1;ICAM1;C3;RPS19;FTH1;LCN2;P4HB;SLC38A2;TGM2
Phenylbutazone-368 mg/kg in CMC-Rat-Kidney-3d-up	16/294	2.52297e-09	3.72813e-08	0	0	6.67752	132.2	HSPA8;JUN;NPM1;RPL10;IGFBP3;RPS6;RPS3A;ATP1B1;CTGF;VEGFA;LDHA;RPS19;FTH1;SPP1;TXNIP;TPT1
Progesterone-11.3 mg/kg in Corn Oil-Rat-Liver-3d-up	16/294	2.52297e-09	3.72114e-08	0	0	6.67752	132.2	HSPA8;NQO1;NPM1;RPL23;RPS6;ASNS;RPS3A;EEF2;TUBA1B;RPS19;PLAU;PSMD3;TXNIP;RPS20;P4HB;TPT1
Theophylline-225 mg/kg in Water-Rat-Heart-3d-up	16/294	2.52297e-09	3.71419e-08	0	0	6.67752	132.2	ITGB1;HSPA8;NPM1;PLOD2;CTGF;VEGFA;LDHA;TUBA1B;CFL1;PSMD3;LCN2;SPP1;VIM;P4HB;TPT1;TGM2
Ethylene Glycol-3525 mg/kg in Water-Rat-Liver-3d-up	17/338	2.57714e-09	3.78685e-08	0	0	6.17127	122.047	NQO1;NPM1;RPL10;RPL23;RPS6;RPS3A;VEGFA;LDHA;H1F0;RPS19;PLAU;PSAT1;FTH1;PGK1;RPS20;CALM2;TPT1
Anisindione-75 mg/kg in CMC-Rat-Liver-5d-up	16/295	2.64909e-09	3.88533e-08	0	0	6.65488	131.428	NQO1;RPL10;RPL23;RPS6;RPS3A;YBX1;EEF2;VEGFA;C3;RPS19;FTH1;CFL1;PGK1;RPS20;P4HB;TPT1
Benzethonium Chloride-30 mg/kg in Corn Oil-Rat-Heart-5d-up	16/295	2.64909e-09	3.87811e-08	0	0	6.65488	131.428	HSPA8;JUN;RPL10;RPL23;RPS6;RPS3A;ATP1B1;VEGFA;LDHA;RPS19;FTH1;CFL1;LCN2;TXNIP;VIM;TGM2
Trichloroacetic Acid-474 mg/kg in Corn Oil-Rat-Liver-1d-dn	16/295	2.64909e-09	3.87091e-08	0	0	6.65488	131.428	TRAM1;NPM1;RPL23;RPS6;EEF2;ICAM1;VEGFA;C3;LDHA;TUBA1B;RPS19;FTH1;FASN;PGK1;P4HB;TPT1
Vincristine-0.05 mg/kg in Saline-Rat-Bone marrow-5d-up	16/295	2.64909e-09	3.86374e-08	0	0	6.65488	131.428	NPM1;RPL10;RPL23;RPS6;RPS3A;LDHA;TUBA1B;RPS19;FTH1;CFL1;PGK1;LCN2;TXNIP;RPS20;VIM;CALM2
Indomethacin-5 mg/kg in Corn Oil-Rat-Liver-1d-dn	17/339	2.69434e-09	3.92248e-08	0	0	6.15307	121.413	TRAM1;NPM1;RPL23;RPS6;RPS3A;ICAM1;LDHA;H1F0;TUBA1B;PLAU;FTH1;FASN;PSMD3;PGK1;TXNIP;RPS20;TPT1
Vincristine-0.05 mg/kg in Saline-Rat-Heart-3d-up	17/339	2.69434e-09	3.91524e-08	0	0	6.15307	121.413	RPL23;TPM1;RPS6;ATP1B1;EEF2;CTGF;VEGFA;LDHA;TUBA1B;FTH1;CFL1;PGK1;LCN2;RPS20;VIM;TPT1;TGM2
Azasetron-580 mg/kg in CMC-Rat-Intestine-5d-up	16/296	2.78097e-09	4.03369e-08	0	0	6.6324	130.661	NQO1;GPX2;NPM1;RPL10;EEF2;LDHA;H1F0;TUBA1B;FTH1;CFL1;PGK1;RPS20;VIM;P4HB;CALM2;TPT1
Fluconazole-394 mg/kg in Corn Oil-Rat-Liver-1d-up	16/296	2.78097e-09	4.02627e-08	0	0	6.6324	130.661	HSPA8;TRAM1;NPM1;RPL10;RPL23;RPS6;RPS3A;EEF2;ICAM1;TUBA1B;RPS19;PLAU;RPS20;P4HB;TPT1;RAI14
Idarubicin-1 mg/kg in Saline-Rat-Kidney-5d-up	16/296	2.78097e-09	4.01888e-08	0	0	6.6324	130.661	HSPA8;NPM1;RPL23;IGFBP3;YBX1;ATP1B1;VEGFA;PLAU;PSAT1;FTH1;FASN;CFL1;SPP1;RPS20;P4HB;TGM2
Clomipramine-115 mg/kg in Water-Rat-Heart-1d-dn	17/340	2.81643e-09	4.06268e-08	0	0	6.13497	120.784	RPL10;RPL23;TPM1;RPS6;RPS3A;ATP1B1;EEF2;LDHA;TUBA1B;RPS19;FTH1;PGK1;VIM;SLC38A2;CALM2;TPT1;TGM2
Ibuprofen-263 mg/kg in Corn Oil-Rat-Kidney-5d-up	17/340	2.81643e-09	4.05525e-08	0	0	6.13497	120.784	HSPA8;GPX2;NPM1;RPL23;RPS6;RPS3A;NAP1L1;ATP1B1;LDHA;RPS19;FTH1;LCN2;SPP1;TXNIP;RPS20;VIM;CALM2
Interleukin 1 Beta-0.01 mg/kg in RSA/Saline-Rat-Liver-0.25d-up	17/340	2.81643e-09	4.04785e-08	0	0	6.13497	120.784	HSPA8;TRAM1;RPL10;RPL23;RPS6;RPS3A;ATP1B1;LDHA;RPS19;CFL1;LCN2;RPS20;P4HB;SLC38A2;CALM2;TPT1;TGM2
Meloxicam-6 mg/kg in Corn Oil-Rat-Liver-1d-up	17/340	2.81643e-09	4.04048e-08	0	0	6.13497	120.784	NQO1;TRAM1;NPM1;RPL23;RPS6;ASNS;EEF2;ICAM1;TUBA1B;RPS19;PLAU;FTH1;PGK1;TXNIP;RPS20;P4HB;TPT1
Prinomastat-500 uM in DMSO-Rat-Primary rat hepatocytes-1d-dn	17/340	2.81643e-09	4.03313e-08	0	0	6.13497	120.784	ITGB1;HSPA8;JUN;TRAM1;GPX2;NPM1;RPS6;CTGF;TUBA1B;RPS19;FTH1;CFL1;PGK1;LCN2;P4HB;CALM2;TPT1
Amiodarone-37.04 uM in DMSO-Rat-Primary rat hepatocytes-1d-up	15/255	2.83592e-09	4.05367e-08	0	0	7.21761	142.049	NPM1;RPL10;RPL23;RPS6;ASNS;RPS3A;EEF2;CTGF;PSAT1;FASN;CFL1;PGK1;RPS20;SLC38A2;RAI14
Aspirin-35 mg/kg in Corn Oil-Rat-Heart-5d-dn	16/297	2.91885e-09	4.16466e-08	0	0	6.61007	129.902	HSPA8;TPM1;RPS6;RPS3A;ATP1B1;IFIT2;CTGF;VEGFA;LDHA;TUBA1B;RPS19;PGK1;P4HB;SLC38A2;CALM2;TGM2
Colchicine-0.6 mg/kg in Saline-Rat-Kidney-5d-up	16/297	2.91885e-09	4.15712e-08	0	0	6.61007	129.902	JUN;NPM1;RPS6;RPS3A;YBX1;ATP1B1;H1F0;TUBA1B;RPS19;PGK1;SPP1;TXNIP;RPS20;VIM;SLC38A2;CALM2
Esmolol-27 mg/kg in Saline-Rat-Heart-5d-up	16/297	2.91885e-09	4.14962e-08	0	0	6.61007	129.902	HSPA8;JUN;NPM1;ANXA2;RPS6;ATP1B1;CTGF;TUBA1B;RPS19;FASN;TXNIP;VIM;P4HB;SLC38A2;TPT1;TGM2
Ethylene Glycol-3525 mg/kg in Water-Rat-Kidney-5d-dn	16/297	2.91885e-09	4.14214e-08	0	0	6.61007	129.902	HSPA8;JUN;RPL23;IGFBP3;RPS6;RPS3A;EEF2;VEGFA;H1F0;TUBA1B;RPS19;SPP1;TXNIP;P4HB;SLC38A2;CALM2
Fluphenazine-45 uM in DMSO-Rat-Primary rat hepatocytes-0.67d-up	16/297	2.91885e-09	4.13469e-08	0	0	6.61007	129.902	ITGB1;HSPA8;NPM1;RPL10;RPL23;ASNS;RPS3A;YBX1;EEF2;SLC7A5;LDHA;TUBA1B;PSAT1;FASN;LCN2;P4HB
Chlorobenzene-500 mg/kg in CMC-Rat-Kidney-3d-dn	16/298	3.06299e-09	4.33108e-08	0	0	6.58789	129.148	RPL10;RPS6;YBX1;EEF2;VEGFA;LDHA;H1F0;RPS19;PSAT1;CFL1;SPP1;P4HB;SLC38A2;CALM2;TPT1;TGM2
Chlorpropamide-269 mg/kg in CMC-Rat-Heart-5d-dn	16/298	3.06299e-09	4.32332e-08	0	0	6.58789	129.148	HSPA8;JUN;ANXA2;RPL10;EEF2;CTGF;LDHA;H1F0;TUBA1B;FTH1;CFL1;PSMD3;PGK1;TXNIP;VIM;TGM2
Colchicine-0.6 mg/kg in Saline-Rat-Kidney-3d-up	16/298	3.06299e-09	4.31559e-08	0	0	6.58789	129.148	TRAM1;NPM1;RPS6;RPS3A;YBX1;ATP1B1;LDHA;TUBA1B;FTH1;CFL1;PGK1;SPP1;TXNIP;RPS20;VIM;CALM2
Lead (II) Acetate-600 mg/kg in Saline-Rat-Bone marrow-5d-up	16/298	3.06299e-09	4.30788e-08	0	0	6.58789	129.148	TRAM1;NPM1;RPL10;RPL23;RPS6;RPS3A;LDHA;RPS19;FTH1;CFL1;LCN2;TXNIP;RPS20;VIM;CALM2;TPT1
Miconazole-920 mg/kg in Corn Oil-Rat-Liver-3d-up	16/298	3.06299e-09	4.3002e-08	0	0	6.58789	129.148	HSPA8;GPX2;NPM1;RPL10;RPL23;RPS6;RPS3A;NAP1L1;RPS19;FTH1;CFL1;PSMD3;RPS20;P4HB;TPT1;RAI14
3-Methylcholanthrene-23 uM in DMSO-Rat-Primary rat hepatocytes-1d-dn	17/342	3.07605e-09	4.31084e-08	0	0	6.09909	119.54	JUN;TRAM1;NPM1;RPL10;RPL23;RPS6;RPS3A;ATP1B1;CTGF;VEGFA;C3;LDHA;PSAT1;PGK1;LCN2;P4HB;TGM2
Idarubicin-1.5 uM in DMSO-Rat-Primary rat hepatocytes-1d-dn	17/342	3.07605e-09	4.30319e-08	0	0	6.09909	119.54	JUN;TRAM1;GPX2;NPM1;RPL10;CTGF;LDHA;TUBA1B;RPS19;PSAT1;CFL1;LCN2;RPS20;P4HB;CALM2;TPT1;TGM2
Antipyrine-1500 mg/kg in CMC-Rat-Kidney-1d-dn	16/299	3.21364e-09	4.48769e-08	0	0	6.56585	128.401	ITGB1;HSPA8;TRAM1;NPM1;RPS6;RPS3A;YBX1;ATP1B1;EEF2;RPS19;PLAU;FTH1;CFL1;PGK1;TXNIP;CALM2
Carmustine-16 mg/kg in Corn Oil-Rat-Liver-3d-up	16/299	3.21364e-09	4.47975e-08	0	0	6.56585	128.401	ABCC3;HSPA8;NQO1;NPM1;RPL10;RPS6;RPS3A;EEF2;TUBA1B;PLAU;FTH1;CFL1;LCN2;TXNIP;RPS20;CALM2
Carvedilol-2000 mg/kg in Corn Oil-Rat-Heart-5d-dn	16/299	3.21364e-09	4.47184e-08	0	0	6.56585	128.401	HSPA8;JUN;TPM1;RPS3A;CTGF;LOXL2;VEGFA;LDHA;TUBA1B;RPS19;CFL1;PGK1;VIM;SLC38A2;CALM2;TGM2
Finasteride-800 mg/kg in Corn Oil-Rat-Kidney-5d-dn	16/299	3.21364e-09	4.46395e-08	0	0	6.56585	128.401	HSPA8;JUN;RPL10;RPL23;IGFBP3;RPS3A;EEF2;IFIT2;CTGF;LDHA;H1F0;CFL1;TXNIP;SLC38A2;TPT1;RAI14
Fludrocortisone Acetate-125 mg/kg in CMC-Rat-Kidney-3d-up	16/299	3.21364e-09	4.45609e-08	0	0	6.56585	128.401	HSPA8;NPM1;RPL10;IGFBP3;RPS6;CTGF;H1F0;RPS19;PLAU;FTH1;LCN2;TXNIP;RPS20;P4HB;TPT1;TGM2
Mosapride-2000 mg/kg in CMC-Rat-Intestine-5d-up	16/299	3.21364e-09	4.44826e-08	0	0	6.56585	128.401	NQO1;GPX2;NPM1;RPL10;IGFBP3;ATP1B1;EEF2;LDHA;TUBA1B;FTH1;CFL1;PGK1;RPS20;P4HB;CALM2;TPT1
Terazosin-657 mg/kg in Water-Rat-Heart-5d-dn	16/299	3.21364e-09	4.44046e-08	0	0	6.56585	128.401	ITGB1;TPM1;RPS3A;YBX1;CTGF;LDHA;TUBA1B;FTH1;CFL1;PSMD3;PGK1;RPS20;SLC38A2;CALM2;TPT1;TGM2
Ergocalciferol-15 mg/kg in CMC-Rat-Heart-3d-dn	17/343	3.21396e-09	4.43312e-08	0	0	6.08131	118.925	HSPA8;RPL10;RPL23;TPM1;RPS6;RPS3A;ATP1B1;VEGFA;LDHA;TUBA1B;RPS19;PGK1;RPS20;VIM;SLC38A2;CALM2;TPT1
Lead (II) Acetate-600 mg/kg in Saline-Rat-Kidney-1d-up	17/343	3.21396e-09	4.42537e-08	0	0	6.08131	118.925	HSPA8;NQO1;TRAM1;GPX2;NPM1;RPL10;RPS6;ATP1B1;LDHA;TUBA1B;RPS19;FTH1;PGK1;TXNIP;RPS20;P4HB;CALM2
Carboplatin-14 mg/kg in Saline-Rat-Kidney-1d-up	17/344	3.35754e-09	4.61501e-08	0	0	6.06363	118.314	RPL10;STAT1;RPL23;IGFBP3;RPS6;RPS3A;VEGFA;H1F0;PLAU;PSAT1;PGK1;SPP1;TXNIP;RPS20;P4HB;SLC38A2;TGM2
Diclofenac-3.5 mg/kg in Corn Oil-Rat-Kidney-3d-up	17/344	3.35754e-09	4.60697e-08	0	0	6.06363	118.314	NPM1;PLOD2;RPS3A;YBX1;EEF2;CTGF;VEGFA;H1F0;TUBA1B;FTH1;CFL1;SPP1;TXNIP;RPS20;VIM;CALM2;TPT1
Aflatoxin B1-0.3 mg/kg in CMC-Rat-Liver-5d-dn	16/300	3.37105e-09	4.61746e-08	0	0	6.54397	127.66	HSPA8;NPM1;RPL10;RPS6;RPS3A;VEGFA;FADS2;LDHA;TUBA1B;FTH1;FASN;CFL1;PGK1;RPS20;P4HB;CALM2
Cadmium Chloride-2 mg/kg in Saline-Rat-Kidney-5d-up	16/300	3.37105e-09	4.60945e-08	0	0	6.54397	127.66	HSPA8;NPM1;RPL10;IGFBP3;RPS6;RPS3A;ATP1B1;VEGFA;H1F0;PLAU;PSAT1;SPP1;TXNIP;RPS20;SLC38A2;TPT1
Carbon Tetrachloride-1175 mg/kg in Corn Oil-Rat-Kidney-1d-up	16/300	3.37105e-09	4.60146e-08	0	0	6.54397	127.66	TRAM1;GPX2;NPM1;RPL23;IGFBP3;RPS6;RPS19;PSAT1;FTH1;PGK1;TXNIP;RPS20;VIM;P4HB;SLC38A2;TPT1
Carbon Tetrachloride-400 mg/kg in Corn Oil-Rat-Liver-1d-up	16/300	3.37105e-09	4.5935e-08	0	0	6.54397	127.66	HSPA8;TRAM1;NPM1;RPL23;RPS6;RPS3A;ATP1B1;EEF2;LDHA;RPS19;FTH1;PGK1;LCN2;RPS20;VIM;P4HB
Geraniol-1500 mg/kg in CMC-Rat-Liver-3d-up	16/300	3.37105e-09	4.58556e-08	0	0	6.54397	127.66	HSPA8;NQO1;NPM1;RPL10;RPL23;RPS6;RPS3A;ICAM1;LDHA;TUBA1B;RPS19;PSAT1;FTH1;PGK1;RPS20;SLC38A2
Praziquantel-1200 mg/kg in CMC-Rat-Liver-5d-dn	16/300	3.37105e-09	4.57766e-08	0	0	6.54397	127.66	HSPA8;JUN;RPL10;RPL23;IGFBP3;RPS3A;EEF2;ICAM1;VEGFA;C3;FADS2;LDHA;H1F0;FTH1;FASN;TPT1
Tenidap-75 mg/kg in Corn Oil-Rat-Kidney-3d-up	16/300	3.37105e-09	4.56978e-08	0	0	6.54397	127.66	JUN;NPM1;RPL10;RPL23;RPS6;RPS3A;CTGF;VEGFA;LDHA;H1F0;RPS19;LCN2;SPP1;TXNIP;RPS20;SLC38A2
DActinomycin-0.06 mg/kg in Saline-Rat-Bone marrow-5d-up	16/301	3.53552e-09	4.78449e-08	0	0	6.52223	126.925	NPM1;RPL10;RPL23;RPS6;RPS3A;LDHA;TUBA1B;RPS19;FTH1;CFL1;PGK1;TXNIP;RPS20;VIM;CALM2;TPT1
Fluocinolone Acetonide-2.5 mg/kg in Corn Oil-Rat-Liver-1d-up	16/301	3.53552e-09	4.77629e-08	0	0	6.52223	126.925	HSPA8;RPL10;STAT1;YBX1;ATP1B1;ICAM1;C3;LDHA;TUBA1B;FTH1;FASN;PGK1;RPS20;P4HB;SLC38A2;TPT1
Methyl Salicylate-444 mg/kg in Corn Oil-Rat-Liver-0.25d-dn	16/301	3.53552e-09	4.76811e-08	0	0	6.52223	126.925	HSPA8;TRAM1;RPL10;RPS3A;EEF2;ICAM1;C3;FADS2;LDHA;FTH1;FASN;RPS20;P4HB;TPT1;TGM2;RAI14
Mycophenolate Mofetil-63 mg/kg in CMC-Rat-Bone marrow-1d-up	16/301	3.53552e-09	4.75996e-08	0	0	6.52223	126.925	HSPA8;TRAM1;NPM1;RPL23;RPS6;LDHA;RPS19;FTH1;CFL1;PGK1;LCN2;SPP1;TXNIP;RPS20;VIM;TPT1
Amitriptyline-160 mg/kg in Water-Rat-Kidney-5d-dn	15/260	3.69469e-09	4.96577e-08	0	0	7.07881	137.445	ITGB1;HSPA8;JUN;RPL10;RPL23;IGFBP3;RPS6;RPS3A;ATP1B1;ICAM1;VEGFA;RPS19;CFL1;RPS20;SLC38A2
Carmustine-4 mg/kg in Corn Oil-Rat-Bone marrow-0.25d-dn	16/302	3.70732e-09	4.97425e-08	0	0	6.50063	126.196	ITGB1;RPL10;RPL23;RPS6;RPS3A;NAP1L1;YBX1;LDHA;FTH1;CFL1;PGK1;RPS20;VIM;P4HB;CALM2;TPT1
Ibuprofen-263 mg/kg in Corn Oil-Rat-Liver-0.25d-up	16/302	3.70732e-09	4.96579e-08	0	0	6.50063	126.196	HSPA8;TRAM1;NPM1;RPL10;RPL23;RPS6;RPS3A;ICAM1;C3;LDHA;RPS19;CFL1;LCN2;P4HB;SLC38A2;RAI14
Ritonavir-1200 mg/kg in CMC-Rat-Kidney-1d-dn	16/302	3.70732e-09	4.95736e-08	0	0	6.50063	126.196	TRAM1;NPM1;RPL10;RPL23;IGFBP3;RPS3A;YBX1;FTH1;CFL1;PGK1;SPP1;RPS20;P4HB;SLC38A2;CALM2;TPT1
Spironolactone-300 mg/kg in CMC-Rat-Kidney-3d-dn	16/302	3.70732e-09	4.94896e-08	0	0	6.50063	126.196	RPL23;RPS3A;YBX1;ATP1B1;LDHA;H1F0;TUBA1B;RPS19;CFL1;PGK1;SPP1;TXNIP;VIM;SLC38A2;CALM2;TPT1
Tranilast-1100 mg/kg in CMC-Rat-Liver-1d-up	16/302	3.70732e-09	4.94058e-08	0	0	6.50063	126.196	HSPA8;NQO1;NPM1;RPL10;RPL23;RPS6;ASNS;RPS3A;ATP1B1;EEF2;LDHA;PSAT1;CFL1;PSMD3;SLC38A2;TPT1
44'-Methylenedianiline-81 mg/kg in Corn Oil-Rat-Liver-1d-up	17/347	3.82449e-09	5.08812e-08	0	0	6.01121	116.508	HSPA8;NQO1;RPL10;RPS6;RPS3A;ATP1B1;EEF2;RPS19;FTH1;CFL1;PSMD3;LCN2;RPS20;VIM;P4HB;CALM2;TPT1
Camptothecin-5 mg/kg in Saline-Rat-Kidney-1d-dn	17/347	3.82449e-09	5.07954e-08	0	0	6.01121	116.508	JUN;RPL10;RPL23;IGFBP3;RPS6;RPS3A;YBX1;ATP1B1;VEGFA;LDHA;H1F0;FASN;TXNIP;RPS20;VIM;CALM2;TPT1
Ethambutol-998 mg/kg in CMC-Rat-Kidney-1d-dn	16/303	3.88675e-09	5.15354e-08	0	0	6.47918	125.474	JUN;TRAM1;NPM1;RPL10;RPL23;YBX1;EEF2;CTGF;LDHA;TUBA1B;CFL1;PGK1;TXNIP;SLC38A2;TPT1;TGM2
Interleukin 6-0.125 mg/kg in RSA/Saline-Rat-Liver-0.25d-up	16/303	3.88675e-09	5.14488e-08	0	0	6.47918	125.474	HSPA8;NPM1;RPL10;RPL23;RPS6;RPS3A;ICAM1;C3;CFL1;LCN2;RPS20;P4HB;SLC38A2;CALM2;TPT1;TGM2
Lacidipine-1 mg/kg in Corn Oil-Rat-Heart-0.25d-up	16/303	3.88675e-09	5.13625e-08	0	0	6.47918	125.474	ITGB1;HSPA8;TRAM1;NPM1;ANXA2;RPL10;RPL23;CTGF;TUBA1B;CFL1;TXNIP;RPS20;P4HB;TPT1;TGM2;RAI14
Norethindrone-125 uM in DMSO-Rat-Primary rat hepatocytes-0.67d-up	16/303	3.88675e-09	5.12765e-08	0	0	6.47918	125.474	ITGB1;HSPA8;NPM1;ANXA2;RPL23;RPS6;ASNS;VEGFA;LDHA;FTH1;FASN;PGK1;LCN2;RPS20;P4HB;TGM2
Propylthiouracil-625 mg/kg in CMC-Rat-Liver-1d-up	16/303	3.88675e-09	5.11907e-08	0	0	6.47918	125.474	ABCC3;HSPA8;NQO1;NPM1;RPL10;RPL23;RPS6;EEF2;C3;TUBA1B;RPS19;PSAT1;FTH1;CFL1;PGK1;P4HB
Sulpiride-667 uM in DMSO-Rat-Primary rat hepatocytes-1d-dn	16/303	3.88675e-09	5.11053e-08	0	0	6.47918	125.474	ITGB1;HSPA8;NQO1;JUN;TRAM1;NPM1;RPL10;YBX1;C3;RPS19;FTH1;VIM;P4HB;CALM2;TPT1;TGM2
Beta-Estradiol 3-Benzoate-25 mg/kg in Corn Oil-Rat-Liver-1d-up	15/261	3.89266e-09	5.10976e-08	0	0	7.05169	136.55	HSPA8;JUN;NPM1;RPL10;RPL23;RPS6;RPS3A;VEGFA;C3;RPS19;FTH1;CFL1;TXNIP;SLC38A2;TGM2
3-Chloroaniline-200 mg/kg in CMC-Rat-Kidney-5d-dn	16/304	4.07412e-09	5.33906e-08	0	0	6.45786	124.757	JUN;RPL10;RPS6;YBX1;ATP1B1;EEF2;CTGF;H1F0;PLAU;PSAT1;CFL1;PGK1;SPP1;TXNIP;RPS20;TGM2
Acetaminophen-486 mg/kg in Corn Oil-Rat-Liver-0.25d-dn	16/304	4.07412e-09	5.33019e-08	0	0	6.45786	124.757	RPL10;ICAM1;VEGFA;C3;FADS2;LDHA;PLAU;FTH1;FASN;CFL1;PGK1;TXNIP;P4HB;TPT1;TGM2;RAI14
Cisplatin-0.5 mg/kg in Saline-Rat-Kidney-5d-up	16/304	4.07412e-09	5.32135e-08	0	0	6.45786	124.757	HSPA8;GPX2;RPL10;RPS6;RPS3A;EEF2;LDHA;TUBA1B;PLAU;FTH1;SPP1;TXNIP;P4HB;SLC38A2;CALM2;TPT1
Fenbendazole-375 mg/kg in Corn Oil-Rat-Liver-3d-up	16/304	4.07412e-09	5.31254e-08	0	0	6.45786	124.757	HSPA8;NQO1;JUN;NPM1;RPL10;RPL23;RPS6;ATP1B1;EEF2;LDHA;TUBA1B;RPS19;PSMD3;PGK1;P4HB;SLC38A2
Granisetron-175 mg/kg in Water-Rat-Liver-1d-up	16/304	4.07412e-09	5.30376e-08	0	0	6.45786	124.757	NQO1;RPL10;RPL23;RPS6;RPS3A;YBX1;LDHA;TUBA1B;RPS19;FTH1;FASN;CFL1;RPS20;VIM;CALM2;TPT1
Nisoldipine-15 mg/kg in Water-Rat-Liver-5d-dn	16/304	4.07412e-09	5.29501e-08	0	0	6.45786	124.757	HSPA8;RPL10;RPL23;RPS6;RPS3A;EEF2;VEGFA;C3;LDHA;FTH1;FASN;PGK1;P4HB;SLC38A2;CALM2;TPT1
Roflumilast-17 mg/kg in CMC-Rat-Liver-4d-up	16/304	4.07412e-09	5.28629e-08	0	0	6.45786	124.757	HSPA8;NQO1;RPL23;RPS6;RPS3A;ATP1B1;ICAM1;VEGFA;C3;RPS19;FTH1;LCN2;RPS20;SLC38A2;TPT1;TGM2
Sulfanilamide-636 mg/kg in Corn Oil-Rat-Kidney-3d-up	16/304	4.07412e-09	5.27759e-08	0	0	6.45786	124.757	HSPA8;JUN;RPL23;RPS6;RPS3A;ATP1B1;CTGF;LDHA;H1F0;TUBA1B;RPS19;FTH1;PGK1;TXNIP;VIM;CALM2
Amikacin-20 mg/kg in Saline-Rat-Kidney-5d-up	16/305	4.26974e-09	5.52192e-08	0	0	6.43669	124.046	ITGB1;HSPA8;RPL10;RPS6;YBX1;H1F0;TUBA1B;RPS19;PLAU;PSAT1;FTH1;CFL1;SPP1;RPS20;CALM2;TGM2
Benoxaprofen-89 mg/kg in CMC-Rat-Liver-5d-up	16/305	4.26974e-09	5.51286e-08	0	0	6.43669	124.046	NQO1;RPL23;RPS6;RPS3A;NAP1L1;ICAM1;VEGFA;C3;LDHA;RPS19;FTH1;LCN2;TXNIP;RPS20;TPT1;TGM2
Bisphenol A-150 mg/kg in Corn Oil-Rat-Liver-3d-dn	16/305	4.26974e-09	5.50384e-08	0	0	6.43669	124.046	NQO1;JUN;RPL10;RPS6;RPS3A;ATP1B1;VEGFA;LDHA;TUBA1B;RPS19;FTH1;FASN;PGK1;P4HB;CALM2;TPT1
Catechol-195 mg/kg in Saline-Rat-Bone marrow-1d-dn	16/305	4.26974e-09	5.49485e-08	0	0	6.43669	124.046	HSPA8;TRAM1;NPM1;RPL10;RPL23;RPS6;RPS3A;LDHA;TUBA1B;RPS19;FTH1;CFL1;PGK1;RPS20;VIM;TPT1
Etoposide-100 mg/kg in Corn Oil-Rat-Spleen-0.25d-up	16/305	4.26974e-09	5.48589e-08	0	0	6.43669	124.046	HSPA8;RPL23;RPS6;RPS3A;YBX1;ATP1B1;EEF2;LDHA;RPS19;FTH1;CFL1;PGK1;TXNIP;VIM;P4HB;TGM2
Fluoxetine-52 mg/kg in CMC-Rat-Kidney-5d-up	16/305	4.26974e-09	5.47695e-08	0	0	6.43669	124.046	TRAM1;NPM1;RPL10;RPL23;RPS6;RPS3A;EEF2;LDHA;H1F0;RPS19;PLAU;PGK1;SPP1;P4HB;SLC38A2;TPT1
Ondansetron-84 mg/kg in Water-Rat-Intestine-0.25d-dn	16/305	4.26974e-09	5.46804e-08	0	0	6.43669	124.046	ITGB1;TRAM1;NPM1;RPL10;RPL23;IGFBP3;YBX1;TUBA1B;RPS19;FTH1;CFL1;PGK1;RPS20;P4HB;CALM2;TPT1
Pioglitazone-300 mg/kg in Corn Oil-Rat-Liver-3d-dn	16/305	4.26974e-09	5.45917e-08	0	0	6.43669	124.046	HSPA8;NQO1;JUN;IGFBP3;RPS3A;VEGFA;LDHA;TUBA1B;RPS19;PLAU;FASN;CFL1;PGK1;P4HB;CALM2;TGM2
Tamoxifen-64 mg/kg in Corn Oil-Rat-Liver-1d-up	16/305	4.26974e-09	5.45032e-08	0	0	6.43669	124.046	HSPA8;NQO1;TRAM1;NPM1;RPL23;RPS6;RPS3A;ATP1B1;EEF2;ICAM1;VEGFA;RPS19;PLAU;PSAT1;RPS20;P4HB
Valsartan-1000 mg/kg in Corn Oil-Rat-Kidney-5d-up	16/305	4.26974e-09	5.4415e-08	0	0	6.43669	124.046	JUN;NPM1;RPL10;RPL23;RPS6;ATP1B1;CTGF;LDHA;PLAU;PSAT1;LCN2;SPP1;TXNIP;RPS20;SLC38A2;TGM2
Quetiapine-150 uM in DMSO-Rat-Primary rat hepatocytes-1d-up	15/263	4.31797e-09	5.49407e-08	0	0	6.99806	134.786	HSPA8;GPX2;NPM1;RPL23;RPS6;ASNS;RPS3A;NAP1L1;YBX1;EEF2;LDHA;TUBA1B;PSAT1;CFL1;LCN2
Gentamicin-267 mg/kg in Corn Oil-Rat-Kidney-1d-up	17/350	4.35058e-09	5.52664e-08	0	0	5.95968	114.742	HSPA8;RPL23;RPS6;RPS3A;YBX1;CTGF;LDHA;RPS19;PSAT1;FTH1;CFL1;SPP1;RPS20;VIM;CALM2;TPT1;TGM2
Penicillamine-100 mg/kg in Water-Rat-Liver-3d-dn	17/350	4.35058e-09	5.51774e-08	0	0	5.95968	114.742	TRAM1;RPL10;RPL23;IGFBP3;RPS6;EEF2;C3;FADS2;LDHA;RPS19;FTH1;FASN;PGK1;TXNIP;RPS20;P4HB;TPT1
Troglitazone-100 mg/kg in Corn Oil-Rat-Liver-3d-dn	18/397	4.38378e-09	5.55091e-08	0	0	5.5632	107.066	TRAM1;NPM1;RPL10;RPL23;RPS6;RPS3A;YBX1;EEF2;ICAM1;VEGFA;C3;FADS2;TUBA1B;RPS19;TXNIP;P4HB;CALM2;TPT1
Benzyl Acetate-1868 mg/kg in CMC-Rat-Kidney-1d-up	16/306	4.47395e-09	5.65599e-08	0	0	6.41565	123.341	ITGB1;HSPA8;JUN;RPL10;RPS6;RPS3A;ATP1B1;CTGF;VEGFA;H1F0;PLAU;FTH1;TXNIP;RPS20;SLC38A2;TPT1
Carbamazepine-490 mg/kg in CMC-Rat-Liver-1d-up	16/306	4.47395e-09	5.64692e-08	0	0	6.41565	123.341	ABCC3;HSPA8;NQO1;JUN;NPM1;RPL10;RPS6;RPS3A;EEF2;RPS19;FTH1;CFL1;PSMD3;PGK1;SLC38A2;TPT1
Carvedilol-2000 mg/kg in Corn Oil-Rat-Liver-3d-up	16/306	4.47395e-09	5.63789e-08	0	0	6.41565	123.341	ABCC3;HSPA8;NQO1;JUN;RPL10;RPL23;RPS6;RPS3A;EEF2;RPS19;PSMD3;LCN2;RPS20;VIM;SLC38A2;TPT1
Dexamethasone-1 mg/kg in Corn Oil-Rat-Liver-1d-up	16/306	4.47395e-09	5.62888e-08	0	0	6.41565	123.341	HSPA8;NPM1;RPL10;RPL23;RPS6;RPS3A;TUBA1B;RPS19;PLAU;FTH1;CFL1;RPS20;P4HB;TPT1;TGM2;RAI14
Doxofylline-483 mg/kg in Water-Rat-Heart-1d-up	16/306	4.47395e-09	5.6199e-08	0	0	6.41565	123.341	ABCC3;HSPA8;NPM1;RPL10;RPL23;RPS6;LDHA;TUBA1B;RPS19;CFL1;TXNIP;RPS20;VIM;P4HB;CALM2;TPT1
Isotretinoin-125 mg/kg in Corn Oil-Rat-Liver-3d-up	16/306	4.47395e-09	5.61095e-08	0	0	6.41565	123.341	NQO1;NPM1;RPL10;YBX1;ICAM1;VEGFA;C3;RPS19;PLAU;FTH1;FASN;CFL1;LCN2;RPS20;TPT1;TGM2
NN'-Diphenyl-P-Phenylenediamine-1000 mg/kg in CMC-Rat-Kidney-3d-dn	16/306	4.47395e-09	5.60203e-08	0	0	6.41565	123.341	ITGB1;TRAM1;RPL10;RPL23;RPS6;ATP1B1;LDHA;H1F0;RPS19;FTH1;PGK1;SPP1;RPS20;VIM;CALM2;TPT1
Trimethadione-535 mg/kg in Water-Rat-Kidney-3d-dn	14/224	4.50727e-09	5.6348e-08	0	0	7.66871	147.374	RPL10;RPL23;RPS6;RPS3A;YBX1;EEF2;CTGF;RPS19;FTH1;TXNIP;RPS20;VIM;CALM2;TGM2
33'5-Triiodo-L-Thyronine-0.1 mg/kg in PEG400-Rat-Heart-3d-up	16/307	4.68707e-09	5.8503e-08	0	0	6.39476	122.642	HSPA8;RPL23;AMIGO2;ATP1B1;CTGF;AKAP12;TUBA1B;RPS19;CFL1;PGK1;LCN2;TXNIP;P4HB;SLC38A2;TPT1;TGM2
Cerivastatin-7 mg/kg in Corn Oil-Rat-Liver-5d-up	16/307	4.68707e-09	5.84104e-08	0	0	6.39476	122.642	HSPA8;GPX2;RPS6;ATP1B1;EEF2;C3;FADS2;LDHA;RPS19;FTH1;FASN;PSMD3;LCN2;RPS20;SLC38A2;TGM2
Etoposide-188 mg/kg in Corn Oil-Rat-Spleen-1d-dn	16/307	4.68707e-09	5.83181e-08	0	0	6.39476	122.642	HSPA8;TRAM1;NPM1;RPL10;RPL23;RPS6;ASNS;RPS3A;NAP1L1;YBX1;FTH1;CFL1;RPS20;VIM;CALM2;TPT1
Hydroxyurea-400 mg/kg in Saline-Rat-Bone marrow-5d-up	16/307	4.68707e-09	5.82262e-08	0	0	6.39476	122.642	HSPA8;NPM1;RPL10;RPL23;RPS6;PLOD2;RPS3A;LDHA;RPS19;FTH1;CFL1;SPP1;TXNIP;RPS20;VIM;TPT1
Primidone-750 mg/kg in CMC-Rat-Liver-3d-dn	16/307	4.68707e-09	5.81345e-08	0	0	6.39476	122.642	TRAM1;RPL23;IGFBP3;YBX1;ICAM1;C3;FADS2;LDHA;H1F0;RPS19;FTH1;FASN;RPS20;P4HB;CALM2;TPT1
Tretinoin-156 uM in DMSO-Rat-Primary rat hepatocytes-0.67d-up	16/307	4.68707e-09	5.80431e-08	0	0	6.39476	122.642	HSPA8;TRAM1;GPX2;NPM1;RPL10;RPL23;ASNS;RPS3A;LDHA;PSAT1;FTH1;PGK1;LCN2;RPS20;P4HB;SLC38A2
Sulindac-750 uM in DMSO-Rat-Primary rat hepatocytes-1d-dn	17/352	4.73746e-09	5.8575e-08	0	0	5.92582	113.585	ITGB1;HSPA8;JUN;NPM1;RPL10;RPS6;RPS3A;YBX1;TUBA1B;RPS19;CFL1;PGK1;LCN2;P4HB;CALM2;TPT1;TGM2
Ethylene Glycol-3525 mg/kg in Water-Rat-Kidney-3d-dn	15/265	4.78536e-09	5.90744e-08	0	0	6.94525	133.055	ITGB1;HSPA8;RPL10;RPL23;YBX1;CTGF;VEGFA;H1F0;TUBA1B;PSAT1;FTH1;CFL1;PGK1;TPT1;TGM2
Buflomedil-615 mg/kg in CMC-Rat-Heart-1d-dn	16/308	4.90948e-09	6.05118e-08	0	0	6.37399	121.948	RPL10;IGFBP3;RPS6;RPS3A;CTGF;VEGFA;LDHA;TUBA1B;RPS19;FTH1;TXNIP;RPS20;VIM;SLC38A2;CALM2;TGM2
Closantel-22 mg/kg in CMC-Rat-Liver-3d-up	16/308	4.90948e-09	6.04173e-08	0	0	6.37399	121.948	HSPA8;NQO1;JUN;NPM1;RPL10;ATP1B1;EEF2;LDHA;H1F0;TUBA1B;RPS20;P4HB;SLC38A2;CALM2;TPT1;TGM2
Fludrocortisone Acetate-125 mg/kg in CMC-Rat-Heart-3d-up	16/308	4.90948e-09	6.0323e-08	0	0	6.37399	121.948	HSPA8;RPL10;TPM1;RPS6;RPS3A;ATP1B1;EEF2;CTGF;LDHA;H1F0;TUBA1B;RPS19;FTH1;CFL1;PSMD3;TXNIP
Ritonavir-1200 mg/kg in CMC-Rat-Kidney-5d-up	16/308	4.90948e-09	6.0229e-08	0	0	6.37399	121.948	HSPA8;NPM1;RPL10;RPL23;IGFBP3;RPS6;RPS3A;ATP1B1;VEGFA;RPS19;PSAT1;FTH1;SPP1;CALM2;TPT1;TGM2
Sildenafil-420 mg/kg in Water-Rat-Liver-5d-up	16/308	4.90948e-09	6.01354e-08	0	0	6.37399	121.948	TRAM1;NPM1;RPL23;RPS3A;NAP1L1;YBX1;ICAM1;PLAU;FTH1;CFL1;PGK1;LCN2;TXNIP;RPS20;P4HB;TPT1
Thalidomide-113 mg/kg in CMC-Rat-Liver-5d-dn	16/308	4.90948e-09	6.0042e-08	0	0	6.37399	121.948	HSPA8;JUN;TRAM1;NPM1;RPL23;RPS3A;ATP1B1;LDHA;H1F0;FASN;CFL1;PGK1;RPS20;P4HB;SLC38A2;TGM2
Tranilast-300 mg/kg in CMC-Rat-Heart-3d-dn	16/308	4.90948e-09	5.99489e-08	0	0	6.37399	121.948	HSPA8;RPL10;RPL23;RPS6;RPS3A;YBX1;LDHA;TUBA1B;RPS19;FTH1;PGK1;RPS20;VIM;SLC38A2;CALM2;TGM2
Podophyllotoxin-4 mg/kg in Corn Oil-Rat-Bone marrow-5d-up	17/353	4.94255e-09	6.02593e-08	0	0	5.90904	113.013	HSPA8;TRAM1;NPM1;RPL10;RPS6;PLOD2;YBX1;LDHA;TUBA1B;RPS19;CFL1;PGK1;LCN2;RPS20;VIM;P4HB;CALM2
Venlafaxine-320 mg/kg in Water-Rat-Kidney-3d-dn	15/266	5.03599e-09	6.13036e-08	0	0	6.91914	132.202	RPL10;RPL23;RPS6;YBX1;ATP1B1;EEF2;CTGF;VEGFA;H1F0;RPS19;FTH1;SPP1;RPS20;VIM;SLC38A2
Allyl Alcohol-25 mg/kg in Saline-Rat-Bone marrow-3d-dn	14/226	5.0525e-09	6.14097e-08	0	0	7.60085	145.202	TRAM1;NPM1;RPL10;RPL23;RPS6;LDHA;H1F0;TUBA1B;RPS19;CFL1;PGK1;TXNIP;RPS20;CALM2
Carvedilol-2000 mg/kg in Corn Oil-Rat-Heart-1d-up	16/309	5.14152e-09	6.23954e-08	0	0	6.35337	121.26	HSPA8;JUN;ANXA2;RPL10;IGFBP3;TPM1;RPS3A;CTGF;ALDH3A1;FTH1;PSMD3;VIM;SLC38A2;TPT1;TGM2;RAI14
Clonazepam-2500 mg/kg in CMC-Rat-Liver-5d-dn	16/309	5.14152e-09	6.22994e-08	0	0	6.35337	121.26	HSPA8;JUN;RPL10;RPL23;RPS6;RPS3A;ATP1B1;C3;FADS2;LDHA;H1F0;RPS19;FASN;PGK1;TXNIP;SLC38A2
Erythromycin-1500 mg/kg in CMC-Rat-Kidney-5d-up	16/309	5.14152e-09	6.22037e-08	0	0	6.35337	121.26	HSPA8;NPM1;RPL10;RPL23;IGFBP3;RPS6;RPS3A;RPS19;PSAT1;FTH1;PSMD3;SPP1;TXNIP;RPS20;TPT1;RAI14
Lovastatin-1500 mg/kg in Corn Oil-Rat-Liver-0.25d-up	16/309	5.14152e-09	6.21083e-08	0	0	6.35337	121.26	HSPA8;NQO1;TRAM1;NPM1;RPL23;RPS6;EEF2;ICAM1;FADS2;LDHA;H1F0;RPS19;CFL1;SLC38A2;CALM2;TPT1
Methylparaben-1500 mg/kg in CMC-Rat-Liver-3d-up	16/309	5.14152e-09	6.20132e-08	0	0	6.35337	121.26	JUN;TRAM1;NPM1;RPL10;RPS6;RPS3A;ATP1B1;ICAM1;C3;LDHA;H1F0;RPS19;PGK1;RPS20;P4HB;SLC38A2
Microcystin-LR-0.07 uM in DMSO-Rat-Primary rat hepatocytes-0.67d-up	16/309	5.14152e-09	6.19184e-08	0	0	6.35337	121.26	ITGB1;JUN;NPM1;ANXA2;RPL10;RPL23;RPS6;CTGF;VEGFA;H1F0;TUBA1B;RPS19;LCN2;RPS20;ITGAV;SLC38A2
Phenobarbital-25 mg/kg in Water-Rat-Liver-1d-up	16/309	5.14152e-09	6.18239e-08	0	0	6.35337	121.26	NQO1;TRAM1;RPL23;RPS6;RPS3A;YBX1;ICAM1;C3;FADS2;RPS19;FTH1;CFL1;PGK1;RPS20;P4HB;CALM2
Pralidoxime Chloride-48 mg/kg in Saline-Rat-Heart-1d-up	15/267	5.29855e-09	6.3615e-08	0	0	6.89322	131.356	HSPA8;JUN;NPM1;RPL10;RPS6;CTGF;VEGFA;LDHA;TUBA1B;CFL1;PSMD3;PGK1;TXNIP;VIM;TGM2
Haloperidol-77 uM in DMSO-Rat-Primary rat hepatocytes-0.67d-up	17/355	5.37745e-09	6.44639e-08	0	0	5.87575	111.88	ITGB1;HSPA8;GPX2;NPM1;RPL10;RPL23;RPS6;ASNS;YBX1;EEF2;C3;LDHA;TUBA1B;RPS19;FTH1;P4HB;TPT1
2-Acetylaminofluorene-30 mg/kg in CMC-Rat-Kidney-1d-dn	16/310	5.38358e-09	6.44394e-08	0	0	6.33287	120.577	TRAM1;RPL10;RPL23;RPS6;PLOD2;ATP1B1;EEF2;LDHA;H1F0;RPS19;FTH1;PGK1;SPP1;RPS20;SLC38A2;CALM2
Carbon Tetrachloride-3178 mg/kg in Saline-Rat-Liver-5d-up	16/310	5.38358e-09	6.43416e-08	0	0	6.33287	120.577	ITGB1;NPM1;RPL10;RPL23;RPS6;RPS3A;ICAM1;FADS2;RPS19;CFL1;LCN2;SPP1;RPS20;VIM;P4HB;TPT1
Myrtecaine-140 mg/kg in Corn Oil-Rat-Heart-1d-up	16/310	5.38358e-09	6.42441e-08	0	0	6.33287	120.577	HSPA8;NPM1;ANXA2;RPL10;RPL23;RPS6;RPS3A;ATP1B1;EEF2;LDHA;TUBA1B;RPS19;FTH1;TXNIP;VIM;TPT1
Idarubicin-4 mg/kg in Saline-Rat-Heart-14d-up	15/268	5.57357e-09	6.64107e-08	0	0	6.8675	130.518	ITGB1;RPL10;RPL23;RPS6;RPS3A;YBX1;LDHA;RPS19;FTH1;CFL1;TXNIP;VIM;CALM2;TPT1;TGM2
Phenobarbital-54 mg/kg in Water-Rat-Liver-3d-dn	15/268	5.57357e-09	6.63104e-08	0	0	6.8675	130.518	HSPA8;NPM1;RPL23;IGFBP3;RPS6;ATP1B1;VEGFA;LDHA;H1F0;PLAU;TXNIP;RPS20;P4HB;SLC38A2;TPT1
Sulindac-64 mg/kg in Corn Oil-Rat-Kidney-5d-dn	15/268	5.57357e-09	6.62104e-08	0	0	6.8675	130.518	RPL10;RPS3A;CTGF;LDHA;H1F0;TUBA1B;PLAU;FTH1;CFL1;PGK1;TXNIP;P4HB;SLC38A2;TPT1;TGM2
Flurbiprofen-10 mg/kg in CMC-Rat-Kidney-3d-up	16/311	5.63606e-09	6.68518e-08	0	0	6.31251	119.9	HSPA8;NPM1;RPL23;RPS6;RPS3A;ATP1B1;EEF2;FTH1;PSMD3;LCN2;SPP1;TXNIP;RPS20;VIM;TPT1;TGM2
Hydroxyurea-400 mg/kg in Saline-Rat-Bone marrow-1d-up	16/311	5.63606e-09	6.67513e-08	0	0	6.31251	119.9	HSPA8;TRAM1;NPM1;RPL10;RPL23;RPS6;PLOD2;LDHA;RPS19;CFL1;PGK1;SPP1;TXNIP;RPS20;VIM;P4HB
Indomethacin-10 mg/kg in Corn Oil-Rat-Liver-3d-up	16/311	5.63606e-09	6.6651e-08	0	0	6.31251	119.9	HSPA8;NQO1;TRAM1;NPM1;RPL10;RPL23;RPS6;ASNS;C3;RPS19;FTH1;LCN2;RPS20;P4HB;SLC38A2;TGM2
Propylene Glycol-2000 mg/kg in Water-Rat-Liver-1d-up	16/311	5.63606e-09	6.65511e-08	0	0	6.31251	119.9	NQO1;RPS6;RPS3A;ATP1B1;EEF2;C3;FADS2;RPS19;PSAT1;FTH1;FASN;CFL1;PGK1;RPS20;TPT1;TGM2
2-Amino-4-Nitrophenol-625 mg/kg in CMC-Rat-Heart-5d-dn	15/269	5.86158e-09	6.91104e-08	0	0	6.84197	129.689	HSPA8;RPL10;TPM1;RPS6;RPS3A;EEF2;CTGF;VEGFA;TUBA1B;RPS19;FTH1;VIM;CALM2;TPT1;TGM2
Azathioprine-20 mg/kg in Corn Oil-Rat-Liver-5d-dn	15/269	5.86158e-09	6.90071e-08	0	0	6.84197	129.689	HSPA8;NQO1;NPM1;RPL10;RPS6;RPS3A;ATP1B1;FADS2;LDHA;FTH1;FASN;PGK1;RPS20;P4HB;SLC38A2
Sulfaphenazole-1695 mg/kg in Water-Rat-Kidney-3d-dn	15/269	5.86158e-09	6.89041e-08	0	0	6.84197	129.689	HSPA8;RPL10;RPL23;RPS6;YBX1;EEF2;CTGF;VEGFA;H1F0;TUBA1B;FTH1;CFL1;SPP1;RPS20;TGM2
Benazepril-1750 mg/kg in CMC-Rat-Kidney-5d-up	16/312	5.89934e-09	6.92448e-08	0	0	6.29228	119.229	HSPA8;JUN;GPX2;NPM1;RPL10;RPL23;RPS6;ATP1B1;CTGF;RPS19;PSMD3;LCN2;SPP1;TXNIP;RPS20;TPT1
Camptothecin-5 mg/kg in Saline-Rat-Kidney-5d-dn	16/312	5.89934e-09	6.91417e-08	0	0	6.29228	119.229	HSPA8;TRAM1;RPL10;RPL23;IGFBP3;RPS6;RPS3A;ATP1B1;CTGF;LDHA;RPS19;SPP1;TXNIP;RPS20;SLC38A2;TPT1
Rofecoxib-800 mg/kg in Corn Oil-Rat-Liver-1d-dn	16/312	5.89934e-09	6.9039e-08	0	0	6.29228	119.229	TRAM1;RPL23;RPS3A;EEF2;C3;FADS2;H1F0;TUBA1B;RPS19;FTH1;FASN;PGK1;TXNIP;RPS20;SLC38A2;CALM2
Thiamphenicol-1500 mg/kg in Water-Rat-Kidney-1d-dn	14/229	5.98343e-09	6.99191e-08	0	0	7.50127	142.031	TRAM1;NPM1;RPL10;RPL23;ATP1B1;VEGFA;FTH1;PGK1;SPP1;TXNIP;RPS20;P4HB;SLC38A2;CALM2
Doxorubicin-3 mg/kg in Saline-Rat-Heart-3d-up	17/358	6.09612e-09	7.11305e-08	0	0	5.82651	110.212	ITGB1;NPM1;RPL23;TPM1;RPS6;RPS3A;YBX1;CTGF;LDHA;RPS19;FTH1;PGK1;SPP1;VIM;P4HB;CALM2;TPT1
Nisoldipine-1125 mg/kg in Water-Rat-Liver-0.25d-up	17/358	6.09612e-09	7.10253e-08	0	0	5.82651	110.212	ITGB1;NQO1;TRAM1;NPM1;RPL10;RPS6;RPS3A;ICAM1;VEGFA;RPS19;PLAU;CFL1;PGK1;RPS20;P4HB;SLC38A2;CALM2
Trihexyphenidyl-588 mg/kg in CMC-Rat-Heart-3d-up	15/270	6.16311e-09	7.16997e-08	0	0	6.81663	128.866	HSPA8;RPL10;RPL23;TPM1;RPS6;RPS3A;YBX1;CTGF;VEGFA;AKAP12;RPS19;FTH1;TXNIP;TPT1;TGM2
Cytarabine-23 mg/kg in Saline-Rat-Liver-0.25d-up	16/313	6.17386e-09	7.17188e-08	0	0	6.27217	118.563	RPL10;RPS6;RPS3A;YBX1;ICAM1;C3;FADS2;LDHA;RPS19;PLAU;PSAT1;FTH1;RPS20;SLC38A2;CALM2;TPT1
Doxorubicin-4 mg/kg in Saline-Rat-Kidney-14d-up	16/313	6.17386e-09	7.16132e-08	0	0	6.27217	118.563	RPL10;RPS6;VEGFA;LDHA;H1F0;TUBA1B;RPS19;PLAU;PSAT1;PGK1;SPP1;TXNIP;RPS20;VIM;P4HB;CALM2
Estriol-313 mg/kg in CMC-Rat-Liver-5d-up	16/313	6.17386e-09	7.15079e-08	0	0	6.27217	118.563	ABCC3;HSPA8;NQO1;TRAM1;NPM1;RPL10;RPL23;RPS6;RPS3A;VEGFA;RPS19;FTH1;RPS20;P4HB;TPT1;TGM2
Ranitidine-1500 mg/kg in CMC-Rat-Heart-3d-up	16/313	6.17386e-09	7.14029e-08	0	0	6.27217	118.563	ITGB1;HSPA8;NPM1;ANXA2;TPM1;RPS6;RPS3A;YBX1;ATP1B1;CTGF;VEGFA;CFL1;P4HB;CALM2;TPT1;TGM2
Saquinavir-1500 mg/kg in CMC-Rat-Kidney-3d-dn	16/313	6.17386e-09	7.12982e-08	0	0	6.27217	118.563	ITGB1;HSPA8;TRAM1;NPM1;RPL10;RPL23;CTGF;LDHA;PLAU;FTH1;CFL1;PGK1;SPP1;TXNIP;P4HB;TPT1
Haloperidol-21 mg/kg in Corn Oil-Rat-Heart-5d-up	17/359	6.35465e-09	7.32785e-08	0	0	5.81028	109.664	ITGB1;ABCC3;NPM1;RPL10;RPL23;IGFBP3;PLOD2;RPS3A;ATP1B1;CTGF;LDHA;RPS19;FTH1;RPS20;VIM;CALM2;TPT1
S(-)-Carbidopa-1200 mg/kg in CMC-Rat-Brain-1d-dn	17/359	6.35465e-09	7.31714e-08	0	0	5.81028	109.664	HSPA8;TRAM1;NPM1;RPL10;RPL23;RPS6;ATP1B1;TUBA1B;RPS19;PSAT1;FTH1;FASN;TXNIP;RPS20;P4HB;CALM2;TPT1
3-Methylcholanthrene-12.5 mg/kg in CMC-Rat-Liver-5d-dn	16/314	6.46005e-09	7.42764e-08	0	0	6.2522	117.902	TRAM1;RPL10;RPL23;EEF2;C3;FADS2;LDHA;RPS19;FTH1;FASN;CFL1;P4HB;SLC38A2;CALM2;TPT1;TGM2
Isotretinoin-125 mg/kg in Corn Oil-Rat-Liver-5d-up	16/314	6.46005e-09	7.41681e-08	0	0	6.2522	117.902	HSPA8;NQO1;JUN;NPM1;RPL23;RPS3A;YBX1;ICAM1;VEGFA;C3;RPS19;CFL1;TXNIP;RPS20;TPT1;TGM2
Netilmicin-40 mg/kg in Saline-Rat-Kidney-28d-up	16/314	6.46005e-09	7.40602e-08	0	0	6.2522	117.902	GPX2;NPM1;RPL10;RPL23;PLOD2;RPS3A;LDHA;RPS19;FTH1;CFL1;LCN2;SPP1;RPS20;VIM;TPT1;TGM2
Phenothiazine-386 mg/kg in Corn Oil-Rat-Liver-0.25d-up	16/314	6.46005e-09	7.39525e-08	0	0	6.2522	117.902	HSPA8;NQO1;NPM1;RPL10;RPL23;IGFBP3;RPS6;RPS3A;ATP1B1;LDHA;RPS19;PLAU;PSMD3;LCN2;RPS20;SLC38A2
Valacyclovir-2000 mg/kg in CMC-Rat-Kidney-1d-up	16/314	6.46005e-09	7.38452e-08	0	0	6.2522	117.902	HSPA8;GPX2;NPM1;RPL10;RPL23;RPS6;ATP1B1;LDHA;RPS19;CFL1;SPP1;TXNIP;RPS20;VIM;CALM2;TGM2
Bithionol-333 mg/kg in Corn Oil-Rat-Kidney-5d-dn	15/271	6.47875e-09	7.39517e-08	0	0	6.79148	128.052	ITGB1;ATP1B1;LDHA;H1F0;TUBA1B;PSAT1;CFL1;PSMD3;PGK1;SPP1;TXNIP;P4HB;SLC38A2;TPT1;TGM2
Carmustine-16 mg/kg in Corn Oil-Rat-Spleen-5d-up	15/271	6.47875e-09	7.38446e-08	0	0	6.79148	128.052	HSPA8;RPL23;RPS3A;ATP1B1;VEGFA;LDHA;TUBA1B;RPS19;CFL1;TXNIP;RPS20;VIM;CALM2;TPT1;TGM2
Zirconium(IV) Chloride-633 mg/kg in Corn Oil-Rat-Liver-3d-up	15/271	6.47875e-09	7.37379e-08	0	0	6.79148	128.052	HSPA8;NQO1;JUN;RPL10;RPL23;RPS6;ATP1B1;LDHA;H1F0;RPS19;FASN;PGK1;TXNIP;P4HB;SLC38A2
4-Chloro-2-Nitroaniline-1200 mg/kg in CMC-Rat-Kidney-5d-up	16/315	6.75834e-09	7.68091e-08	0	0	6.23235	117.246	HSPA8;NQO1;GPX2;NPM1;RPL10;RPL23;RPS3A;RPS19;FTH1;LCN2;SPP1;RPS20;ITGAV;TPT1;TGM2;RAI14
4-Methylpyrazole-155 mg/kg in Saline-Rat-Kidney-5d-dn	16/315	6.75834e-09	7.66984e-08	0	0	6.23235	117.246	HSPA8;TRAM1;NPM1;RPL10;RPL23;RPS6;RPS3A;ATP1B1;CTGF;LDHA;RPS19;PLAU;SPP1;RPS20;SLC38A2;TPT1
Ciprofloxacin-72 mg/kg in Corn Oil-Rat-Liver-1d-up	16/315	6.75834e-09	7.65881e-08	0	0	6.23235	117.246	JUN;TRAM1;RPL23;ATP1B1;ICAM1;VEGFA;C3;FADS2;TUBA1B;RPS19;PLAU;FTH1;CFL1;PSMD3;TXNIP;RPS20
Dexamethasone-150 mg/kg in Corn Oil-Rat-Liver-0.25d-up	16/315	6.75834e-09	7.64781e-08	0	0	6.23235	117.246	HSPA8;NPM1;RPL10;RPL23;IGFBP3;RPS6;RPS3A;YBX1;ATP1B1;ICAM1;RPS19;FTH1;PSMD3;PGK1;RPS20;P4HB
Eperisone-501 mg/kg in CMC-Rat-Liver-5d-dn	16/315	6.75834e-09	7.63683e-08	0	0	6.23235	117.246	HSPA8;JUN;NPM1;RPS6;ICAM1;VEGFA;C3;LDHA;FTH1;FASN;PGK1;TXNIP;RPS20;P4HB;CALM2;TPT1
Loratadine-10 mg/kg in Water-Rat-Heart-3d-up	16/315	6.75834e-09	7.62589e-08	0	0	6.23235	117.246	ITGB1;TRAM1;RPL23;TPM1;RPS6;RPS3A;YBX1;ATP1B1;CTGF;VEGFA;RPS19;FTH1;CFL1;RPS20;VIM;CALM2
Nateglinide-625 mg/kg in CMC-Rat-Liver-3d-up	16/315	6.75834e-09	7.61498e-08	0	0	6.23235	117.246	HSPA8;JUN;NPM1;RPL10;RPS6;RPS3A;ATP1B1;VEGFA;C3;LDHA;RPS19;FASN;TXNIP;RPS20;SLC38A2;CALM2
Thioguanine-24 mg/kg in Corn Oil-Rat-Spleen-5d-up	16/315	6.75834e-09	7.6041e-08	0	0	6.23235	117.246	HSPA8;NPM1;RPL10;IGFBP3;RPS3A;YBX1;VEGFA;LDHA;CFL1;PGK1;TXNIP;RPS20;VIM;CALM2;TPT1;TGM2
Ramipril-1500 mg/kg in CMC-Rat-Kidney-3d-dn	18/409	6.97264e-09	7.83403e-08	0	0	5.39997	101.418	ITGB1;RPL10;RPL23;RPS6;RPS3A;YBX1;LDHA;RPS19;PLAU;PSAT1;FTH1;CFL1;PGK1;SPP1;RPS20;P4HB;CALM2;TPT1
Hydrocortisone-56 mg/kg in Corn Oil-Rat-Liver-5d-dn	16/316	7.06922e-09	7.93122e-08	0	0	6.21263	116.596	TRAM1;RPL10;RPL23;IGFBP3;RPS6;RPS3A;EEF2;FADS2;LDHA;H1F0;TUBA1B;RPS19;FTH1;SLC38A2;CALM2;TPT1
Indomethacin-9.6 mg/kg in Water-Rat-Kidney-1d-up	16/316	7.06922e-09	7.91994e-08	0	0	6.21263	116.596	TRAM1;NPM1;IGFBP3;RPS6;RPS3A;YBX1;CTGF;RPS19;FTH1;PGK1;SPP1;TXNIP;RPS20;CALM2;TPT1;TGM2
Irinotecan-5 mg/kg in Saline-Rat-Heart-5d-up	16/316	7.06922e-09	7.90869e-08	0	0	6.21263	116.596	JUN;NPM1;STAT1;RPS3A;IFIT2;CTGF;VEGFA;FTH1;CFL1;PSMD3;TXNIP;RPS20;SLC38A2;TPT1;TGM2;RAI14
Nimesulide-162 mg/kg in Corn Oil-Rat-Kidney-1d-up	16/316	7.06922e-09	7.89747e-08	0	0	6.21263	116.596	HSPA8;NPM1;RPL23;RPS6;RPS3A;ATP1B1;LDHA;TUBA1B;RPS19;SPP1;TXNIP;RPS20;P4HB;SLC38A2;CALM2;TPT1
Hydrocortisone-56 mg/kg in Corn Oil-Rat-Heart-1d-dn	15/273	7.15474e-09	7.98169e-08	0	0	6.74172	126.444	HSPA8;NPM1;RPL10;RPS6;RPS3A;VEGFA;TUBA1B;RPS19;CFL1;RPS20;VIM;P4HB;SLC38A2;CALM2;TPT1
Methotrexate-27 mg/kg in Corn Oil-Rat-Kidney-3d-up	15/273	7.15474e-09	7.9704e-08	0	0	6.74172	126.444	NPM1;RPL10;RPL23;RPS6;RPS3A;YBX1;CTGF;VEGFA;LDHA;FTH1;SPP1;TXNIP;RPS20;SLC38A2;TPT1
Zileuton-450 mg/kg in Corn Oil-Rat-Liver-1d-up	15/273	7.15474e-09	7.95914e-08	0	0	6.74172	126.444	ABCC3;HSPA8;NQO1;GPX2;NPM1;RPL10;RPL23;RPS6;RPS3A;ICAM1;PSAT1;PSMD3;PGK1;RPS20;P4HB
Cyclosporin A-70 mg/kg in Corn Oil-Rat-Liver-3d-up	17/362	7.19196e-09	7.98926e-08	0	0	5.76213	108.042	HSPA8;NQO1;TRAM1;RPL10;RPL23;RPS6;ICAM1;C3;FADS2;LDHA;TUBA1B;RPS19;PLAU;FASN;RPS20;CALM2;TPT1
Enoxacin-100 mg/kg in Corn Oil-Rat-Liver-3d-dn	18/410	7.24219e-09	8.03373e-08	0	0	5.3868	100.967	HSPA8;TRAM1;NPM1;RPL10;RPL23;RPS6;RPS3A;YBX1;EEF2;C3;FADS2;LDHA;RPS19;CFL1;PGK1;P4HB;CALM2;TPT1
Alfacalcidol-0.043 mg/kg in CMC-Rat-Heart-1d-dn	16/317	7.39315e-09	8.18965e-08	0	0	6.19303	115.95	HSPA8;RPL10;TPM1;RPS6;RPS3A;CTGF;VEGFA;LDHA;TUBA1B;RPS19;PGK1;VIM;SLC38A2;CALM2;TPT1;TGM2
Lamotrigine-26 mg/kg in CMC-Rat-Kidney-1d-dn	16/317	7.39315e-09	8.17815e-08	0	0	6.19303	115.95	ITGB1;TRAM1;RPL10;RPL23;RPS6;LDHA;H1F0;RPS19;PLAU;PGK1;SPP1;TXNIP;RPS20;CALM2;TPT1;TGM2
Rifampin-99 mg/kg in CMC-Rat-Kidney-5d-dn	16/317	7.39315e-09	8.16668e-08	0	0	6.19303	115.95	HSPA8;RPL10;RPS6;RPS3A;ATP1B1;EEF2;CTGF;LDHA;RPS19;PLAU;PSAT1;PSMD3;PGK1;SLC38A2;CALM2;TPT1
Azathioprine-20 mg/kg in Corn Oil-Rat-Kidney-0.25d-dn	15/274	7.51634e-09	8.29114e-08	0	0	6.71712	125.652	ITGB1;NPM1;RPL10;IGFBP3;YBX1;VEGFA;PSAT1;FTH1;CFL1;PGK1;SPP1;P4HB;SLC38A2;TPT1;TGM2
Aldosterone-0.065 mg/kg in Saline-Rat-Kidney-1d-dn	16/318	7.73063e-09	8.51558e-08	0	0	6.17355	115.31	NPM1;RPL23;RPS6;RPS3A;YBX1;LDHA;TUBA1B;PSAT1;FASN;CFL1;TXNIP;RPS20;VIM;CALM2;TPT1;TGM2
Hexachlorophene-8 mg/kg in Corn Oil-Rat-Liver-5d-up	16/318	7.73063e-09	8.50369e-08	0	0	6.17355	115.31	NQO1;JUN;TRAM1;NPM1;ATP1B1;C3;LDHA;H1F0;RPS19;FTH1;FASN;PGK1;RPS20;SLC38A2;CALM2;TPT1
Sparfloxacin-29 mg/kg in Corn Oil-Rat-Liver-1d-up	16/318	7.73063e-09	8.49183e-08	0	0	6.17355	115.31	NQO1;TRAM1;RPL10;RPL23;RPS6;RPS3A;EEF2;FADS2;RPS19;PLAU;PSAT1;PSMD3;TXNIP;RPS20;CALM2;TPT1
Spironolactone-300 mg/kg in CMC-Rat-Liver-1d-dn	16/318	7.73063e-09	8.48e-08	0	0	6.17355	115.31	HSPA8;TRAM1;RPL10;RPL23;IGFBP3;RPS6;RPS3A;ATP1B1;VEGFA;C3;LDHA;RPS19;FTH1;FASN;TXNIP;RPS20
Sulfaphenazole-1695 mg/kg in Water-Rat-Kidney-1d-up	17/364	7.80528e-09	8.54998e-08	0	0	5.73047	106.979	ITGB1;TRAM1;NPM1;IGFBP3;ATP1B1;PLAU;PSAT1;FTH1;CFL1;PSMD3;PGK1;TXNIP;P4HB;SLC38A2;TPT1;TGM2;RAI14
Sulfathiazole-2629 mg/kg in Water-Rat-Kidney-5d-up	17/364	7.80528e-09	8.53811e-08	0	0	5.73047	106.979	TRAM1;NPM1;RPL10;IGFBP3;RPS3A;ATP1B1;CTGF;LDHA;PLAU;PSAT1;CFL1;PSMD3;SPP1;TXNIP;P4HB;TPT1;RAI14
Bithionol-333 mg/kg in Corn Oil-Rat-Spleen-5d-up	16/319	8.08217e-09	8.82873e-08	0	0	6.1542	114.675	HSPA8;NPM1;RPL10;RPS3A;EEF2;CTGF;VEGFA;LDHA;FTH1;CFL1;PGK1;TXNIP;RPS20;VIM;CALM2;TPT1
Catechol-40 mg/kg in Saline-Rat-Kidney-0.25d-dn	16/319	8.08217e-09	8.8165e-08	0	0	6.1542	114.675	JUN;RPL10;IGFBP3;RPS6;RPS3A;YBX1;CTGF;H1F0;PSAT1;FTH1;CFL1;SPP1;RPS20;CALM2;TPT1;TGM2
Fluphenazine-22 mg/kg in Corn Oil-Rat-Liver-0.25d-up	16/319	8.08217e-09	8.80431e-08	0	0	6.1542	114.675	HSPA8;TRAM1;NPM1;RPL10;RPL23;RPS6;ASNS;RPS3A;FADS2;RPS19;PSAT1;FASN;TXNIP;RPS20;P4HB;SLC38A2
Penicillin G-243 mg/kg in Saline-Rat-Kidney-3d-up	16/319	8.08217e-09	8.79215e-08	0	0	6.1542	114.675	HSPA8;RPL10;RPS6;YBX1;ATP1B1;CTGF;VEGFA;H1F0;RPS19;PSAT1;FTH1;FASN;PGK1;SPP1;RPS20;CALM2
Sulfinpyrazone-269 mg/kg in CMC-Rat-Kidney-5d-up	16/319	8.08217e-09	8.78002e-08	0	0	6.1542	114.675	HSPA8;NPM1;RPL10;IGFBP3;RPS6;ATP1B1;CTGF;VEGFA;AKAP12;H1F0;TUBA1B;RPS19;FTH1;RPS20;P4HB;SLC38A2
Antipyrine-1500 mg/kg in CMC-Rat-Kidney-3d-dn	15/276	8.29007e-09	8.99347e-08	0	0	6.66844	124.088	RPS6;RPS3A;ATP1B1;EEF2;LDHA;H1F0;RPS19;PLAU;FTH1;CFL1;PGK1;SPP1;TXNIP;CALM2;TGM2
Gliclazide-1500 mg/kg in CMC-Rat-Kidney-3d-dn	15/276	8.29007e-09	8.9811e-08	0	0	6.66844	124.088	TRAM1;RPL23;RPS6;RPS3A;ATP1B1;LDHA;H1F0;RPS19;PLAU;PSAT1;PGK1;TXNIP;VIM;SLC38A2;TGM2
Ofloxacin-3000 mg/kg in Water-Rat-Kidney-3d-dn	15/276	8.29007e-09	8.96876e-08	0	0	6.66844	124.088	RPL10;RPL23;RPS6;RPS3A;YBX1;EEF2;LDHA;H1F0;TUBA1B;RPS19;SPP1;VIM;CALM2;TPT1;TGM2
Dexfenfluramine-29 mg/kg in Water-Rat-Kidney-3d-dn	14/235	8.32813e-09	8.99758e-08	0	0	7.30975	135.988	RPL10;RPL23;RPS6;YBX1;CTGF;TUBA1B;RPS19;FTH1;CFL1;PGK1;TXNIP;RPS20;VIM;TGM2
Carboplatin-14 mg/kg in Saline-Rat-Liver-3d-dn	16/320	8.4483e-09	9.1149e-08	0	0	6.13497	114.045	HSPA8;JUN;RPL23;RPS3A;YBX1;ICAM1;VEGFA;C3;FADS2;PLAU;FTH1;LCN2;TXNIP;P4HB;TPT1;RAI14
Nimodipine-10 mg/kg in Corn Oil-Rat-Heart-0.25d-dn	17/366	8.46635e-09	9.12189e-08	0	0	5.69915	105.931	HSPA8;RPL10;RPL23;TPM1;RPS6;RPS3A;YBX1;ATP1B1;EEF2;LDHA;H1F0;TUBA1B;RPS19;FTH1;CFL1;PGK1;VIM
Dexamethasone-456 uM in DMSO-Rat-Primary rat hepatocytes-0.67d-up	15/277	8.70359e-09	9.36468e-08	0	0	6.64437	123.316	RPL10;RPS6;ASNS;CTGF;VEGFA;C3;LDHA;PSAT1;FTH1;PGK1;LCN2;RPS20;VIM;SLC38A2;TGM2
Busulfan-9 mg/kg in Corn Oil-Rat-Liver-1d-up	16/321	8.82957e-09	9.48727e-08	0	0	6.11586	113.42	TRAM1;NPM1;RPL10;ASNS;ICAM1;VEGFA;FADS2;LDHA;TUBA1B;RPS19;PLAU;PSAT1;PSMD3;RPS20;P4HB;TPT1
Dexchlorpheniramine-3 mg/kg in Water-Rat-Heart-3d-up	16/321	8.82957e-09	9.47434e-08	0	0	6.11586	113.42	ITGB1;TRAM1;NPM1;RPL23;TPM1;RPS6;YBX1;CTGF;VEGFA;RPS19;FTH1;CFL1;RPS20;VIM;CALM2;TPT1
Rapamycin-60 mg/kg in CMC-Rat-Kidney-3d-up	16/321	8.82957e-09	9.46145e-08	0	0	6.11586	113.42	JUN;RPL10;RPS6;RPS3A;ATP1B1;EEF2;CTGF;VEGFA;H1F0;RPS19;CFL1;TXNIP;RPS20;VIM;CALM2;TPT1
Aspirin-35 mg/kg in Corn Oil-Rat-Kidney-0.25d-dn	15/278	9.13585e-09	9.77635e-08	0	0	6.62047	122.552	RPL10;RPL23;RPS6;PLOD2;ATP1B1;VEGFA;LDHA;H1F0;RPS19;PSAT1;PGK1;SPP1;SLC38A2;CALM2;TGM2
Atorvastatin-2.5 mg/kg in Corn Oil-Rat-Kidney-0.25d-dn	15/278	9.13585e-09	9.76309e-08	0	0	6.62047	122.552	ITGB1;NPM1;YBX1;ATP1B1;EEF2;CTGF;PSAT1;FTH1;CFL1;PGK1;SPP1;RPS20;SLC38A2;TPT1;TGM2
Isoeugenol-1560 mg/kg in CMC-Rat-Liver-1d-up	15/278	9.13585e-09	9.74986e-08	0	0	6.62047	122.552	ABCC3;HSPA8;NQO1;NPM1;RPL10;RPL23;RPS6;RPS3A;EEF2;RPS19;PSAT1;FTH1;PGK1;SLC38A2;TPT1
Sulindac-23 mg/kg in Corn Oil-Rat-Kidney-5d-up	15/278	9.13585e-09	9.73667e-08	0	0	6.62047	122.552	TRAM1;GPX2;RPL23;RPS6;RPS3A;VEGFA;LDHA;RPS19;PLAU;FTH1;PGK1;SPP1;TXNIP;P4HB;TPT1
Amlodipine-19 mg/kg in Corn Oil-Rat-Liver-5d-up	16/322	9.22654e-09	9.82003e-08	0	0	6.09686	112.799	ITGB1;HSPA8;NQO1;NPM1;RPL23;RPS3A;YBX1;ICAM1;C3;RPS19;PLAU;PSAT1;PGK1;RPS20;P4HB;TPT1
Azathioprine-20 mg/kg in Corn Oil-Rat-Liver-0.25d-up	16/322	9.22654e-09	9.80677e-08	0	0	6.09686	112.799	HSPA8;NQO1;TRAM1;NPM1;RPL10;RPL23;RPS6;RPS3A;FADS2;TUBA1B;RPS19;FASN;PSMD3;RPS20;CALM2;TPT1
Bisacodyl-1750 mg/kg in CMC-Rat-Intestine-1d-up	16/322	9.22654e-09	9.79356e-08	0	0	6.09686	112.799	ITGB1;GPX2;NPM1;ANXA2;RPL10;YBX1;EEF2;LDHA;TUBA1B;FTH1;CFL1;PGK1;LCN2;P4HB;TPT1;RAI14
Carbon Tetrachloride-400 mg/kg in Corn Oil-Rat-Kidney-3d-up	16/322	9.22654e-09	9.78038e-08	0	0	6.09686	112.799	HSPA8;JUN;GPX2;RPL10;RPL23;IGFBP3;RPS3A;ATP1B1;VEGFA;RPS19;PSAT1;PSMD3;TXNIP;RPS20;P4HB;RAI14
Progesterone-11.3 mg/kg in Corn Oil-Rat-Liver-1d-up	16/322	9.22654e-09	9.76723e-08	0	0	6.09686	112.799	HSPA8;NQO1;NPM1;RPL23;RPS6;RPS3A;EEF2;VEGFA;TUBA1B;RPS19;PSAT1;PSMD3;PGK1;RPS20;CALM2;TPT1
Cytarabine-487 mg/kg in Saline-Rat-Liver-1d-dn	14/237	9.27832e-09	9.80887e-08	0	0	7.24807	134.057	ITGB1;HSPA8;TRAM1;RPL10;RPL23;RPS6;RPS3A;ICAM1;VEGFA;LDHA;TUBA1B;RPS19;PGK1;RPS20
Doxorubicin-4 mg/kg in Saline-Rat-Heart-14d-up	15/279	9.58762e-09	1.01223e-07	0	0	6.59674	121.794	RPL10;RPS3A;ATP1B1;CTGF;LDHA;TUBA1B;FTH1;CFL1;PGK1;TXNIP;VIM;P4HB;CALM2;TPT1;TGM2
Rabeprazole-1024 mg/kg in Water-Rat-Liver-1d-up	15/279	9.58762e-09	1.01087e-07	0	0	6.59674	121.794	ABCC3;HSPA8;NQO1;NPM1;RPL10;RPS6;RPS3A;YBX1;EEF2;RPS19;FTH1;PSMD3;LCN2;RPS20;SLC38A2
Sodium Nitroprusside-6 mg/kg in Saline-Rat-Heart-1d-dn	15/279	9.58762e-09	1.00952e-07	0	0	6.59674	121.794	HSPA8;JUN;RPL23;RPS3A;ICAM1;CTGF;VEGFA;TUBA1B;PSMD3;TXNIP;RPS20;VIM;SLC38A2;CALM2;TPT1
Ethanol-6000 mg/kg in Saline-Rat-Liver-3d-up	16/323	9.63979e-09	1.01366e-07	0	0	6.07799	112.184	HSPA8;TRAM1;NPM1;RPL10;RPL23;RPS6;RPS3A;ICAM1;C3;RPS19;PLAU;PSAT1;FTH1;PSMD3;RPS20;P4HB
Etodolac-24 mg/kg in CMC-Rat-Liver-3d-up	16/323	9.63979e-09	1.01231e-07	0	0	6.07799	112.184	NQO1;RPL10;RPS3A;EEF2;C3;FADS2;H1F0;TUBA1B;RPS19;FTH1;CFL1;PSMD3;LCN2;VIM;P4HB;TGM2
Carbon Tetrachloride-400 mg/kg in Corn Oil-Rat-Liver-0.25d-up	15/280	1.00597e-08	1.055e-07	0	0	6.57318	121.043	HSPA8;JUN;NPM1;RPL10;RPL23;RPS6;RPS3A;LDHA;TUBA1B;RPS19;PLAU;PSMD3;PGK1;P4HB;SLC38A2
Oxybutynin-230 mg/kg in Water-Rat-Heart-5d-up	15/280	1.00597e-08	1.05359e-07	0	0	6.57318	121.043	HSPA8;JUN;RPL10;RPS3A;YBX1;CTGF;VEGFA;TUBA1B;RPS19;FTH1;FASN;TXNIP;SLC38A2;TPT1;RAI14
Zidovudine-1540 mg/kg in Corn Oil-Rat-Liver-0.25d-up	15/280	1.00597e-08	1.05219e-07	0	0	6.57318	121.043	JUN;TRAM1;RPL10;RPL23;YBX1;EEF2;ICAM1;VEGFA;C3;LDHA;RPS19;FTH1;P4HB;SLC38A2;TPT1
Ampiroxicam-94 mg/kg in CMC-Rat-Kidney-1d-up	16/324	1.00699e-08	1.05187e-07	0	0	6.05923	111.573	TRAM1;NPM1;RPL10;RPS3A;YBX1;TUBA1B;RPS19;FTH1;CFL1;PGK1;SPP1;TXNIP;P4HB;SLC38A2;CALM2;TPT1
Fludrocortisone Acetate-125 mg/kg in CMC-Rat-Liver-3d-dn	16/324	1.00699e-08	1.05047e-07	0	0	6.05923	111.573	HSPA8;RPL23;IGFBP3;RPS6;RPS3A;C3;FADS2;TUBA1B;RPS19;FASN;CFL1;PGK1;TXNIP;RPS20;CALM2;TPT1
Lomustine-4.2 mg/kg in Corn Oil-Rat-Liver-0.25d-up	16/324	1.00699e-08	1.04909e-07	0	0	6.05923	111.573	NQO1;NPM1;RPL10;RPL23;RPS6;ASNS;RPS3A;ATP1B1;FADS2;TUBA1B;RPS19;PLAU;FASN;PGK1;P4HB;TPT1
Phenothiazine-386 mg/kg in Corn Oil-Rat-Liver-3d-up	16/324	1.00699e-08	1.0477e-07	0	0	6.05923	111.573	ABCC3;HSPA8;NQO1;TRAM1;GPX2;NPM1;STAT1;ICAM1;TUBA1B;PLAU;FTH1;CFL1;PSMD3;LCN2;RPS20;P4HB
Ritonavir-1200 mg/kg in CMC-Rat-Kidney-3d-up	16/324	1.00699e-08	1.04632e-07	0	0	6.05923	111.573	HSPA8;RPL10;IGFBP3;RPS6;RPS3A;ATP1B1;EEF2;VEGFA;H1F0;RPS19;FTH1;TXNIP;VIM;CALM2;TPT1;TGM2
Bromisovalum-250 mg/kg in Corn Oil-Rat-Kidney-3d-dn	16/325	1.05176e-08	1.09139e-07	0	0	6.04059	110.967	HSPA8;RPL10;RPL23;RPS6;RPS3A;VEGFA;LDHA;RPS19;PSAT1;FTH1;CFL1;SPP1;RPS20;CALM2;TPT1;TGM2
Oxymetazoline-0.5 mg/kg in Water-Rat-Heart-5d-dn	16/325	1.05176e-08	1.08996e-07	0	0	6.04059	110.967	RPL10;RPL23;TPM1;RPS6;RPS3A;ATP1B1;VEGFA;LDHA;FTH1;CFL1;PGK1;RPS20;SLC38A2;CALM2;TPT1;TGM2
Atropine-94 mg/kg in Water-Rat-Liver-1d-dn	15/281	1.05529e-08	1.09217e-07	0	0	6.54979	120.299	TRAM1;RPL10;YBX1;ICAM1;VEGFA;C3;FADS2;LDHA;FTH1;FASN;PGK1;P4HB;CALM2;TPT1;RAI14
Quinapril-2500 mg/kg in CMC-Rat-Kidney-0.25d-dn	15/281	1.05529e-08	1.09074e-07	0	0	6.54979	120.299	ITGB1;NPM1;RPL10;RPL23;RPS6;ATP1B1;VEGFA;LDHA;TUBA1B;RPS19;CFL1;SPP1;VIM;P4HB;CALM2
Clotrimazole-52 mg/kg in Corn Oil-Rat-Liver-3d-dn	16/326	1.09834e-08	1.13375e-07	0	0	6.02206	110.365	HSPA8;TRAM1;RPL10;RPL23;IGFBP3;RPS6;ATP1B1;VEGFA;FADS2;LDHA;H1F0;RPS19;PGK1;RPS20;P4HB;TPT1
Famciclovir-1200 mg/kg in Saline-Rat-Liver-1d-dn	16/326	1.09834e-08	1.13227e-07	0	0	6.02206	110.365	TRAM1;RPL10;RPL23;RPS6;RPS3A;C3;FADS2;LDHA;RPS19;PLAU;FTH1;FASN;TXNIP;RPS20;P4HB;TPT1
Hydrocortisone-56 mg/kg in Corn Oil-Rat-Kidney-1d-up	16/326	1.09834e-08	1.13079e-07	0	0	6.02206	110.365	HSPA8;NPM1;RPL10;STAT1;IGFBP3;IFIT2;CTGF;LDHA;PLAU;PSAT1;PGK1;SPP1;TXNIP;RPS20;P4HB;TPT1
Mifepristone-300 mg/kg in Corn Oil-Rat-Liver-5d-dn	16/326	1.09834e-08	1.12931e-07	0	0	6.02206	110.365	RPL10;RPL23;IGFBP3;RPS6;RPS3A;VEGFA;FADS2;LDHA;H1F0;RPS19;FTH1;FASN;PGK1;TXNIP;RPS20;CALM2
Rifampin-99 mg/kg in CMC-Rat-Kidney-3d-dn	16/326	1.09834e-08	1.12784e-07	0	0	6.02206	110.365	TRAM1;RPL10;RPS6;ATP1B1;CTGF;LDHA;TUBA1B;PLAU;PSAT1;PGK1;RPS20;P4HB;SLC38A2;CALM2;TPT1;TGM2
Flubendazole-1200 mg/kg in Corn Oil-Rat-Liver-1d-dn	15/282	1.1068e-08	1.13505e-07	0	0	6.52656	119.561	TRAM1;NPM1;IGFBP3;RPS6;ICAM1;C3;LDHA;H1F0;PLAU;FASN;PSMD3;PGK1;RPS20;P4HB;RAI14
Ethinylestradiol-190 uM in DMSO-Rat-Primary rat hepatocytes-1d-dn	16/327	1.1468e-08	1.17454e-07	0	0	6.00364	109.769	TRAM1;GPX2;RPL10;CTGF;C3;LDHA;TUBA1B;RPS19;FTH1;CFL1;PGK1;LCN2;RPS20;CALM2;TPT1;TGM2
Fluvastatin-5 mg/kg in Corn Oil-Rat-Liver-1d-up	16/327	1.1468e-08	1.17302e-07	0	0	6.00364	109.769	HSPA8;TRAM1;NPM1;RPL23;ATP1B1;ICAM1;FADS2;LDHA;H1F0;RPS19;FASN;PSMD3;PGK1;LCN2;P4HB;TPT1
Methyldopa-325 mg/kg in Water-Rat-Liver-3d-dn	16/327	1.1468e-08	1.1715e-07	0	0	6.00364	109.769	HSPA8;RPL10;RPL23;IGFBP3;RPS6;RPS3A;EEF2;LDHA;TUBA1B;RPS19;PLAU;FTH1;FASN;P4HB;CALM2;TPT1
Nimodipine-1100 mg/kg in Corn Oil-Rat-Heart-1d-up	16/327	1.1468e-08	1.16998e-07	0	0	6.00364	109.769	HSPA8;JUN;NPM1;ANXA2;RPL10;RPS3A;CTGF;LDHA;TUBA1B;FTH1;PSMD3;TXNIP;VIM;TPT1;TGM2;RAI14
Valacyclovir-88 mg/kg in CMC-Rat-Kidney-3d-up	16/327	1.1468e-08	1.16846e-07	0	0	6.00364	109.769	HSPA8;JUN;NPM1;RPL10;RPL23;IGFBP3;RPS6;ATP1B1;CTGF;VEGFA;H1F0;RPS19;TXNIP;RPS20;SLC38A2;TGM2
Venlafaxine-1481 uM in DMSO-Rat-Primary rat hepatocytes-0.67d-up	16/327	1.1468e-08	1.16695e-07	0	0	6.00364	109.769	ITGB1;HSPA8;GPX2;NPM1;RPL10;RPL23;RPS6;ASNS;CTGF;C3;LDHA;TUBA1B;RPS19;FTH1;P4HB;TPT1
Vinblastine-0.3 mg/kg in Saline-Rat-Heart-3d-up	16/327	1.1468e-08	1.16545e-07	0	0	6.00364	109.769	RPL10;RPL23;TPM1;RPS6;ATP1B1;EEF2;CTGF;VEGFA;LDHA;TUBA1B;FTH1;CFL1;PSMD3;RPS20;VIM;TGM2
Doxorubicin-3 mg/kg in Saline-Rat-Spleen-5d-up	15/283	1.1606e-08	1.17795e-07	0	0	6.5035	118.83	HSPA8;RPL23;IGFBP3;PLOD2;RPS3A;ATP1B1;VEGFA;LDHA;TUBA1B;RPS19;CFL1;TXNIP;VIM;TPT1;TGM2
Naproxen-134 mg/kg in Corn Oil-Rat-Liver-1d-up	15/283	1.1606e-08	1.17644e-07	0	0	6.5035	118.83	HSPA8;NQO1;TRAM1;RPL23;RPS6;RPS3A;EEF2;ICAM1;C3;RPS19;CFL1;LCN2;TXNIP;RPS20;TPT1
Omeprazole-415 mg/kg in Corn Oil-Rat-Liver-3d-dn	15/283	1.1606e-08	1.17492e-07	0	0	6.5035	118.83	JUN;TRAM1;RPL10;RPS6;RPS3A;EEF2;VEGFA;C3;FADS2;LDHA;H1F0;FASN;PGK1;P4HB;CALM2
Sodium Arsenite-30 mg/kg in Saline-Rat-Kidney-1d-dn	15/283	1.1606e-08	1.17342e-07	0	0	6.5035	118.83	RPL10;RPL23;EEF2;LDHA;H1F0;TUBA1B;PLAU;FTH1;FASN;CFL1;PGK1;SPP1;VIM;TPT1;TGM2
Tacrine-24 mg/kg in Water-Rat-Heart-5d-dn	15/283	1.1606e-08	1.17191e-07	0	0	6.5035	118.83	HSPA8;JUN;RPL10;IGFBP3;EEF2;CTGF;VEGFA;TUBA1B;RPS19;CFL1;PGK1;TXNIP;VIM;SLC38A2;TGM2
11-Dichloroethene-600 mg/kg in Water-Rat-Liver-3d-up	16/328	1.19722e-08	1.20733e-07	0	0	5.98534	109.177	HSPA8;JUN;RPL10;RPL23;RPS6;RPS3A;TUBA1B;RPS19;FTH1;PGK1;LCN2;TXNIP;RPS20;P4HB;SLC38A2;CALM2
1-Naphthyl Isothiocyanate-15 mg/kg in Corn Oil-Rat-Liver-1d-dn	15/284	1.21678e-08	1.22549e-07	0	0	6.4806	118.106	TRAM1;RPL23;RPS6;EEF2;C3;FADS2;H1F0;RPS19;FTH1;FASN;RPS20;VIM;SLC38A2;TPT1;TGM2
Losartan-1000 mg/kg in Water-Rat-Kidney-3d-dn	15/284	1.21678e-08	1.22393e-07	0	0	6.4806	118.106	HSPA8;RPL10;RPL23;RPS6;YBX1;EEF2;VEGFA;AKAP12;H1F0;RPS19;PGK1;SPP1;VIM;SLC38A2;RAI14
Oxymetazoline-0.5 mg/kg in Water-Rat-Liver-3d-up	15/284	1.21678e-08	1.22236e-07	0	0	6.4806	118.106	HSPA8;JUN;NPM1;RPL10;RPS6;RPS3A;YBX1;ATP1B1;C3;FADS2;FTH1;FASN;SLC38A2;TPT1;TGM2
Rosiglitazone-1800 mg/kg in Corn Oil-Rat-Heart-3d-dn	15/284	1.21678e-08	1.22081e-07	0	0	6.4806	118.106	HSPA8;JUN;TPM1;RPS3A;ATP1B1;VEGFA;LDHA;TUBA1B;RPS19;CFL1;PGK1;VIM;P4HB;SLC38A2;TGM2
Cisapride-250 mg/kg in Corn Oil-Rat-Heart-3d-up	16/329	1.24965e-08	1.2522e-07	0	0	5.96714	108.589	ITGB1;RPL10;RPS3A;ATP1B1;CTGF;VEGFA;LDHA;FASN;CFL1;PGK1;RPS20;P4HB;SLC38A2;CALM2;TPT1;TGM2
Colchicine-2000 uM in DMSO-Rat-Primary rat hepatocytes-0.67d-up	16/329	1.24965e-08	1.2506e-07	0	0	5.96714	108.589	ITGB1;HSPA8;NQO1;GPX2;NPM1;RPL10;RPL23;RPS6;ASNS;C3;LDHA;H1F0;RPS19;FTH1;P4HB;TPT1
Vincristine-0.05 mg/kg in Saline-Rat-Heart-5d-up	16/329	1.24965e-08	1.24902e-07	0	0	5.96714	108.589	RPL23;TPM1;RPS6;RPS3A;LDHA;TUBA1B;RPS19;FTH1;CFL1;PGK1;LCN2;RPS20;VIM;CALM2;TPT1;TGM2
Bleomycin A2-12 mg/kg in Saline-Rat-Bone marrow-5d-up	15/285	1.27542e-08	1.27316e-07	0	0	6.45786	117.387	NPM1;RPL10;RPL23;RPS6;RPS3A;LDHA;TUBA1B;RPS19;FTH1;CFL1;PGK1;TXNIP;RPS20;VIM;CALM2
Carboplatin-6 mg/kg in Saline-Rat-Liver-0.25d-up	15/285	1.27542e-08	1.27155e-07	0	0	6.45786	117.387	HSPA8;NQO1;RPL10;RPL23;RPS6;RPS3A;ICAM1;VEGFA;C3;LDHA;RPS19;PLAU;FTH1;RPS20;TPT1
Chlorobenzene-500 mg/kg in CMC-Rat-Kidney-1d-dn	15/285	1.27542e-08	1.26994e-07	0	0	6.45786	117.387	TRAM1;RPL10;RPS6;ATP1B1;EEF2;LDHA;H1F0;RPS19;PLAU;PSAT1;FTH1;SPP1;SLC38A2;CALM2;TGM2
Indinavir-1000 mg/kg in CMC-Rat-Kidney-5d-dn	15/285	1.27542e-08	1.26834e-07	0	0	6.45786	117.387	HSPA8;RPL10;RPL23;PLOD2;RPS3A;YBX1;LDHA;H1F0;RPS19;PLAU;FTH1;SPP1;SLC38A2;CALM2;TPT1
Lacidipine-14 mg/kg in Corn Oil-Rat-Heart-3d-up	15/285	1.27542e-08	1.26674e-07	0	0	6.45786	117.387	HSPA8;NPM1;ANXA2;RPL10;TPM1;RPS6;RPS3A;YBX1;RPS19;FTH1;TXNIP;RPS20;VIM;TPT1;RAI14
Clotrimazole-52 mg/kg in Corn Oil-Rat-Liver-0.25d-up	16/330	1.30418e-08	1.29367e-07	0	0	5.94906	108.006	NQO1;RPL10;RPS6;RPS3A;ICAM1;FADS2;LDHA;TUBA1B;RPS19;PLAU;PSAT1;PSMD3;PGK1;P4HB;CALM2;TPT1
Doxapram-20 mg/kg in Saline-Rat-Heart-5d-up	16/330	1.30418e-08	1.29204e-07	0	0	5.94906	108.006	ITGB1;ABCC3;TRAM1;NPM1;RPL10;IGFBP3;RPS6;CTGF;LDHA;FASN;TXNIP;RPS20;P4HB;CALM2;TPT1;TGM2
Hydrazine-45 mg/kg in Water-Rat-Kidney-5d-up	18/426	1.30912e-08	1.29531e-07	0	0	5.18448	94.1052	NPM1;RPL23;RPS3A;YBX1;ATP1B1;CTGF;LOXL2;LDHA;H1F0;PLAU;FTH1;CFL1;PGK1;SPP1;TXNIP;P4HB;CALM2;TPT1
Baclofen-19 mg/kg in CMC-Rat-Heart-5d-up	15/286	1.33663e-08	1.32087e-07	0	0	6.43528	116.675	ITGB1;NPM1;RPL10;RPL23;RPS6;ATP1B1;CTGF;VEGFA;RPS19;CFL1;TXNIP;RPS20;VIM;P4HB;SLC38A2
Emetine-1 mg/kg in Saline-Rat-Heart-3d-up	15/286	1.33663e-08	1.31921e-07	0	0	6.43528	116.675	ITGB1;NPM1;RPL10;ATP1B1;CTGF;VEGFA;LDHA;TUBA1B;CFL1;LCN2;TXNIP;RPS20;VIM;CALM2;TGM2
Fenoprofen-52 mg/kg in Corn Oil-Rat-Kidney-5d-up	15/286	1.33663e-08	1.31756e-07	0	0	6.43528	116.675	HSPA8;GPX2;NPM1;RPL23;RPS6;RPS3A;YBX1;EEF2;CTGF;LDHA;SPP1;VIM;CALM2;TPT1;TGM2
Isoniazid-79 mg/kg in Water-Rat-Liver-5d-dn	15/286	1.33663e-08	1.31591e-07	0	0	6.43528	116.675	HSPA8;NPM1;RPL10;RPL23;RPS6;RPS3A;EEF2;ICAM1;C3;LDHA;RPS19;PGK1;CALM2;TPT1;RAI14
Valproic Acid-1500 mg/kg in Water-Rat-Heart-3d-dn	15/286	1.33663e-08	1.31427e-07	0	0	6.43528	116.675	ITGB1;RPL10;TPM1;RPS6;YBX1;CTGF;VEGFA;LDHA;CFL1;PGK1;RPS20;VIM;CALM2;TPT1;TGM2
Citalopram-150 uM in DMSO-Rat-Primary rat hepatocytes-0.67d-up	15/287	1.40051e-08	1.37536e-07	0	0	6.41286	115.969	NPM1;RPL10;RPS6;ASNS;RPS3A;CTGF;SLC7A5;LDHA;PSAT1;FTH1;PGK1;LCN2;P4HB;SLC38A2;TPT1
Ethinylestradiol-10 mg/kg in Corn Oil-Rat-Liver-1d-up	15/287	1.40051e-08	1.37365e-07	0	0	6.41286	115.969	HSPA8;NQO1;NPM1;RPL23;RPS6;RPS3A;EEF2;TUBA1B;RPS19;PSAT1;FTH1;RPS20;SLC38A2;CALM2;RAI14
Ketorolac-48 mg/kg in Water-Rat-Liver-5d-up	15/287	1.40051e-08	1.37194e-07	0	0	6.41286	115.969	NQO1;TRAM1;NPM1;RPL10;RPL23;RPS6;RPS3A;C3;RPS19;FTH1;LCN2;RPS20;P4HB;SLC38A2;TGM2
Olanzapine-23 mg/kg in CMC-Rat-Heart-1d-dn	15/287	1.40051e-08	1.37024e-07	0	0	6.41286	115.969	HSPA8;NPM1;RPL23;IGFBP3;TPM1;RPS6;RPS3A;CTGF;VEGFA;TUBA1B;CFL1;TXNIP;VIM;SLC38A2;TGM2
Oxaliplatin-8 mg/kg in Saline-Rat-Bone marrow-1d-dn	15/287	1.40051e-08	1.36854e-07	0	0	6.41286	115.969	HSPA8;NPM1;RPL23;RPS6;RPS3A;NAP1L1;YBX1;H1F0;TUBA1B;RPS19;LCN2;RPS20;VIM;CALM2;TPT1
Thiabendazole-92 mg/kg in Corn Oil-Rat-Liver-3d-dn	15/287	1.40051e-08	1.36684e-07	0	0	6.41286	115.969	HSPA8;JUN;RPL10;IGFBP3;ATP1B1;LDHA;H1F0;TUBA1B;PLAU;FTH1;FASN;PGK1;P4HB;TPT1;TGM2
Anisindione-75 mg/kg in CMC-Rat-Liver-1d-up	16/332	1.41983e-08	1.38398e-07	0	0	5.91322	106.853	NQO1;RPL10;RPL23;RPS6;RPS3A;YBX1;EEF2;C3;LDHA;RPS19;FTH1;CFL1;PGK1;RPS20;TPT1;TGM2
Dexamethasone-456 uM in DMSO-Rat-Primary rat hepatocytes-1d-dn	16/332	1.41983e-08	1.38227e-07	0	0	5.91322	106.853	ITGB1;HSPA8;NQO1;JUN;NPM1;RPL10;RPS3A;YBX1;ATP1B1;EEF2;TUBA1B;RPS19;CFL1;PGK1;CALM2;TPT1
Itraconazole-30 mg/kg in Corn Oil-Rat-Liver-3d-up	15/288	1.46716e-08	1.42659e-07	0	0	6.39059	115.269	HSPA8;TRAM1;RPL23;ICAM1;VEGFA;C3;RPS19;PLAU;FTH1;FASN;TXNIP;RPS20;P4HB;SLC38A2;RAI14
Lead (II) Acetate-200 mg/kg in Saline-Rat-Kidney-5d-up	15/288	1.46716e-08	1.42483e-07	0	0	6.39059	115.269	NQO1;GPX2;NPM1;RPL10;RPL23;RPS6;ATP1B1;LDHA;H1F0;RPS19;LCN2;SPP1;TXNIP;CALM2;TGM2
Megestrol Acetate-132 mg/kg in CMC-Rat-Liver-3d-dn	15/288	1.46716e-08	1.42307e-07	0	0	6.39059	115.269	HSPA8;TRAM1;RPL23;IGFBP3;RPS6;RPS3A;YBX1;ICAM1;C3;RPS19;FTH1;PGK1;TXNIP;RPS20;TPT1
Mevastatin-1200 mg/kg in CMC-Rat-Skeletal muscle-5d-dn	15/288	1.46716e-08	1.42132e-07	0	0	6.39059	115.269	HSPA8;JUN;RPL10;RPS3A;YBX1;LDHA;RPS19;FTH1;CFL1;PGK1;TXNIP;VIM;SLC38A2;CALM2;TPT1
Rabeprazole-1024 mg/kg in Water-Rat-Liver-3d-dn	15/288	1.46716e-08	1.41958e-07	0	0	6.39059	115.269	TRAM1;RPL23;IGFBP3;ICAM1;VEGFA;C3;LDHA;H1F0;RPS19;FASN;PGK1;TXNIP;SLC38A2;CALM2;TPT1
44'-Diethylaminoethoxyhexestrol-20 uM in DMSO-Rat-Primary rat hepatocytes-0.67d-up	16/333	1.4811e-08	1.43131e-07	0	0	5.89547	106.283	ITGB1;HSPA8;GPX2;NPM1;RPL10;RPL23;RPS6;ASNS;CTGF;C3;LDHA;TUBA1B;RPS19;FTH1;P4HB;TPT1
Harringtonine-23 mg/kg in Saline-Rat-Bone marrow-1d-up	16/333	1.4811e-08	1.42955e-07	0	0	5.89547	106.283	ITGB1;HSPA8;NPM1;RPL10;STAT1;RPL23;RPS6;NAP1L1;YBX1;EEF2;IFIT2;RPS19;FTH1;CFL1;SPP1;TXNIP
Azathioprine-0.5 uM in DMSO-Rat-Primary rat hepatocytes-1d-up	14/246	1.48956e-08	1.43596e-07	0	0	6.98289	125.847	ITGB1;HSPA8;NPM1;RPL23;YBX1;EEF2;VEGFA;C3;LDHA;FTH1;CFL1;PGK1;LCN2;P4HB
123-Trichloropropane-108 mg/kg in CMC-Rat-Heart-5d-dn	15/289	1.53669e-08	1.47958e-07	0	0	6.36848	114.576	RPL10;TPM1;RPS6;EEF2;CTGF;VEGFA;LDHA;TUBA1B;RPS19;FTH1;PGK1;VIM;SLC38A2;TPT1;TGM2
Amitriptyline-72 uM in DMSO-Rat-Primary rat hepatocytes-0.67d-up	15/289	1.53669e-08	1.47777e-07	0	0	6.36848	114.576	HSPA8;NPM1;RPL10;RPL23;ASNS;RPS3A;YBX1;SLC7A5;LDHA;PSAT1;FTH1;LCN2;RPS20;P4HB;SLC38A2
Cyclosporin A-350 mg/kg in Corn Oil-Rat-Heart-5d-up	15/289	1.53669e-08	1.47597e-07	0	0	6.36848	114.576	ITGB1;TRAM1;NPM1;RPL10;RPL23;IGFBP3;RPS6;RPS3A;LDHA;FTH1;RPS20;VIM;P4HB;CALM2;TPT1
Doxorubicin-0.65 mg/kg in Saline-Rat-Spleen-0.25d-up	15/289	1.53669e-08	1.47417e-07	0	0	6.36848	114.576	ITGB1;JUN;RPL10;ASNS;RPS3A;YBX1;EEF2;RPS19;FTH1;CFL1;PGK1;P4HB;CALM2;TPT1;RAI14
Penicillamine-100 mg/kg in Water-Rat-Liver-5d-dn	15/289	1.53669e-08	1.47238e-07	0	0	6.36848	114.576	HSPA8;IGFBP3;RPS3A;YBX1;EEF2;C3;FADS2;LDHA;TUBA1B;PLAU;FASN;PGK1;P4HB;TPT1;RAI14
Phentolamine-44 mg/kg in Saline-Rat-Heart-5d-up	15/289	1.53669e-08	1.47059e-07	0	0	6.36848	114.576	NPM1;RPL10;STAT1;RPS6;YBX1;LDHA;FTH1;PGK1;TXNIP;RPS20;VIM;P4HB;SLC38A2;TPT1;TGM2
Spironolactone-300 mg/kg in CMC-Rat-Liver-3d-dn	15/289	1.53669e-08	1.46881e-07	0	0	6.36848	114.576	HSPA8;RPL23;IGFBP3;RPS6;RPS3A;YBX1;ICAM1;VEGFA;C3;LDHA;H1F0;RPS19;FTH1;FASN;TXNIP
Anisindione-75 mg/kg in CMC-Rat-Liver-3d-up	16/334	1.54479e-08	1.47476e-07	0	0	5.87781	105.717	HSPA8;NQO1;RPL10;RPS6;RPS3A;ATP1B1;EEF2;LDHA;H1F0;RPS19;FTH1;CFL1;PSMD3;RPS20;TPT1;TGM2
Cyproterone Acetate-2500 mg/kg in CMC-Rat-Liver-5d-dn	16/334	1.54479e-08	1.47297e-07	0	0	5.87781	105.717	HSPA8;RPL10;RPL23;IGFBP3;RPS6;RPS3A;EEF2;FADS2;LDHA;H1F0;TUBA1B;RPS19;FTH1;PSMD3;PGK1;TXNIP
Enalapril-1500 mg/kg in CMC-Rat-Kidney-3d-dn	16/334	1.54479e-08	1.47119e-07	0	0	5.87781	105.717	ITGB1;NPM1;RPL10;CTGF;LDHA;H1F0;TUBA1B;RPS19;PLAU;CFL1;PGK1;SPP1;RPS20;SLC38A2;CALM2;TPT1
Fluvastatin-94 mg/kg in Corn Oil-Rat-Liver-3d-up	16/334	1.54479e-08	1.46941e-07	0	0	5.87781	105.717	HSPA8;JUN;RPL10;RPL23;RPS6;RPS3A;YBX1;VEGFA;C3;FADS2;RPS19;FTH1;FASN;RPS20;CALM2;TPT1
Amprenavir-600 mg/kg in CMC-Rat-Kidney-3d-dn	15/290	1.60921e-08	1.52884e-07	0	0	6.34652	113.888	HSPA8;TRAM1;NPM1;RPL10;RPL23;YBX1;CTGF;LDHA;RPS19;PLAU;PGK1;SPP1;RPS20;P4HB;CALM2
Beta-Estradiol 3-Benzoate-0.25 mg/kg in Corn Oil-Rat-Liver-1d-up	15/290	1.60921e-08	1.527e-07	0	0	6.34652	113.888	HSPA8;NQO1;TRAM1;NPM1;RPL10;RPL23;RPS6;ASNS;RPS3A;CPLX2;C3;PSAT1;RPS20;P4HB;TPT1
Doxazosin-500 mg/kg in Water-Rat-Heart-3d-dn	15/290	1.60921e-08	1.52517e-07	0	0	6.34652	113.888	ITGB1;RPL10;RPL23;TPM1;YBX1;VEGFA;LDHA;TUBA1B;RPS19;CFL1;PGK1;VIM;SLC38A2;CALM2;TPT1
Rapamycin-60 mg/kg in CMC-Rat-Kidney-5d-up	18/432	1.62324e-08	1.53661e-07	0	0	5.11247	91.6987	HSPA8;JUN;RPL10;RPL23;IGFBP3;RPS6;RPS3A;ATP1B1;EEF2;CTGF;VEGFA;RPS19;PSAT1;FTH1;CFL1;TXNIP;RPS20;TPT1
Streptozotocin-3000 uM in DMSO-Rat-Primary rat hepatocytes-0.67d-dn	14/249	1.73638e-08	1.64174e-07	0	0	6.89876	123.273	HSPA8;TRAM1;NPM1;RPL10;RPL23;C3;LDHA;RPS19;PSAT1;FTH1;PGK1;LCN2;RPS20;CALM2
Beta-Estradiol-150 mg/kg in Corn Oil-Rat-Skeletal muscle-5d-dn	16/337	1.75117e-08	1.65375e-07	0	0	5.82549	104.046	ITGB1;HSPA8;RPL10;TPM1;RPS3A;ATP1B1;LDHA;H1F0;TUBA1B;FTH1;CFL1;PGK1;VIM;P4HB;SLC38A2;CALM2
Leflunomide-60 mg/kg in Corn Oil-Rat-Kidney-3d-dn	16/337	1.75117e-08	1.65177e-07	0	0	5.82549	104.046	JUN;NPM1;RPL10;RPS6;YBX1;EEF2;LDHA;TUBA1B;RPS19;CFL1;PGK1;TXNIP;P4HB;SLC38A2;TPT1;TGM2
Penicillamine-852 mg/kg in Water-Rat-Liver-0.25d-up	16/337	1.75117e-08	1.64979e-07	0	0	5.82549	104.046	HSPA8;NQO1;RPL10;RPL23;RPS6;RPS3A;ATP1B1;ICAM1;VEGFA;LDHA;RPS19;PSAT1;PGK1;RPS20;CALM2;TPT1
Cisplatin-2 mg/kg in Saline-Rat-Bone marrow-5d-up	15/292	1.76369e-08	1.65959e-07	0	0	6.30305	112.53	RPL10;RPL23;RPS6;LDHA;RPS19;FTH1;CFL1;PGK1;LCN2;SPP1;TXNIP;RPS20;VIM;CALM2;TPT1
Diethylstilbestrol-2.8 mg/kg in Corn Oil-Rat-Bone marrow-0.25d-dn	15/292	1.76369e-08	1.65761e-07	0	0	6.30305	112.53	NPM1;RPL10;RPL23;RPS6;RPS3A;LDHA;TUBA1B;RPS19;CFL1;PSMD3;PGK1;LCN2;VIM;CALM2;TPT1
Fluvastatin-5 mg/kg in Corn Oil-Rat-Liver-5d-up	15/292	1.76369e-08	1.65564e-07	0	0	6.30305	112.53	JUN;TRAM1;NPM1;RPL23;RPS6;RPS3A;ATP1B1;ICAM1;FADS2;RPS19;FASN;PGK1;RPS20;CALM2;TPT1
Lomefloxacin-2000 mg/kg in CMC-Rat-Liver-1d-up	15/292	1.76369e-08	1.65367e-07	0	0	6.30305	112.53	NQO1;TRAM1;RPL10;EEF2;ICAM1;VEGFA;C3;FTH1;CFL1;LCN2;RPS20;P4HB;SLC38A2;TPT1;TGM2
Nifedipine-1022 mg/kg in CMC-Rat-Heart-5d-up	15/292	1.76369e-08	1.6517e-07	0	0	6.30305	112.53	JUN;NPM1;RPL10;RPL23;RPS6;RPS3A;CTGF;VEGFA;TUBA1B;RPS19;TXNIP;RPS20;VIM;P4HB;SLC38A2
Nitrendipine-10 mg/kg in Corn Oil-Rat-Heart-0.25d-dn	15/292	1.76369e-08	1.64974e-07	0	0	6.30305	112.53	RPL10;RPL23;TPM1;RPS6;YBX1;ATP1B1;EEF2;VEGFA;TUBA1B;RPS19;FTH1;CFL1;PGK1;VIM;TPT1
Ofloxacin-3000 mg/kg in Water-Rat-Heart-3d-up	15/292	1.76369e-08	1.64778e-07	0	0	6.30305	112.53	ITGB1;NPM1;RPL23;RPS6;RPS3A;YBX1;ATP1B1;CTGF;VEGFA;RPS19;FTH1;TXNIP;RPS20;VIM;CALM2
Sulfadoxine-380 mg/kg in Corn Oil-Rat-Liver-5d-dn	15/292	1.76369e-08	1.64583e-07	0	0	6.30305	112.53	TRAM1;RPL10;RPL23;RPS6;ATP1B1;EEF2;VEGFA;LDHA;H1F0;RPS19;FTH1;FASN;SLC38A2;CALM2;TPT1
Thalidomide-113 mg/kg in CMC-Rat-Liver-1d-dn	15/292	1.76369e-08	1.64388e-07	0	0	6.30305	112.53	HSPA8;TRAM1;RPL23;RPS6;ATP1B1;ICAM1;VEGFA;C3;LDHA;TUBA1B;FASN;TXNIP;RPS20;P4HB;SLC38A2
Cytarabine-23 mg/kg in Saline-Rat-Bone marrow-0.25d-up	17/385	1.78633e-08	1.66301e-07	0	0	5.41789	96.6581	HSPA8;NPM1;RPL10;RPL23;RPS6;ASNS;NAP1L1;YBX1;SLC7A5;LDHA;TUBA1B;RPS19;FTH1;RPS20;VIM;CALM2;TPT1
Penicillin G-243 mg/kg in Saline-Rat-Kidney-1d-up	16/338	1.82538e-08	1.69737e-07	0	0	5.80825	103.497	HSPA8;NPM1;RPL10;RPS6;ATP1B1;LDHA;H1F0;RPS19;PLAU;FTH1;CFL1;PGK1;SPP1;RPS20;P4HB;CALM2
Simvastatin-1200 mg/kg in Corn Oil-Rat-Liver-1d-up	14/250	1.82655e-08	1.69645e-07	0	0	6.87117	122.432	HSPA8;RPL23;EEF2;ICAM1;FADS2;LDHA;H1F0;TUBA1B;RPS19;FTH1;FASN;TXNIP;CALM2;RAI14
Azathioprine-160 mg/kg in Corn Oil-Rat-Liver-0.25d-up	15/293	1.84589e-08	1.71239e-07	0	0	6.28154	111.86	HSPA8;NQO1;NPM1;RPL10;RPL23;TXNRD1;RPS6;RPS3A;LDHA;TUBA1B;RPS19;FTH1;PSMD3;P4HB;RAI14
Clofibrate-500 mg/kg in Corn Oil-Rat-Liver-3d-up	15/293	1.84589e-08	1.71038e-07	0	0	6.28154	111.86	HSPA8;RPL23;RPS6;RPS3A;YBX1;ATP1B1;EEF2;FADS2;LDHA;TUBA1B;RPS19;FTH1;PSMD3;RPS20;TPT1
Foscarnet-350 mg/kg in Saline-Rat-Bone marrow-5d-up	15/293	1.84589e-08	1.70837e-07	0	0	6.28154	111.86	NPM1;RPL10;RPL23;RPS6;RPS3A;LDHA;TUBA1B;RPS19;FTH1;CFL1;PGK1;LCN2;TXNIP;VIM;CALM2
Idarubicin-4 mg/kg in Saline-Rat-Heart-28d-up	15/293	1.84589e-08	1.70636e-07	0	0	6.28154	111.86	HSPA8;NPM1;RPL10;RPL23;RPS6;ATP1B1;CTGF;TUBA1B;RPS19;CFL1;TXNIP;RPS20;VIM;P4HB;TGM2
Lisinopril-2000 mg/kg in CMC-Rat-Kidney-1d-up	15/293	1.84589e-08	1.70436e-07	0	0	6.28154	111.86	HSPA8;NPM1;RPL10;RPL23;RPS3A;ATP1B1;CTGF;H1F0;TUBA1B;RPS19;FTH1;SPP1;TXNIP;P4HB;SLC38A2
Valproic Acid-235 mg/kg in Water-Rat-Liver-3d-up	17/386	1.85562e-08	1.71134e-07	0	0	5.40386	96.202	NPM1;RPL10;STAT1;RPL23;RPS6;ATP1B1;VEGFA;C3;FADS2;RPS19;FTH1;FASN;CFL1;TXNIP;P4HB;SLC38A2;RAI14
Hydroxyurea-400 mg/kg in Saline-Rat-Bone marrow-3d-dn	16/339	1.90246e-08	1.75249e-07	0	0	5.79112	102.952	TRAM1;NPM1;RPL10;RPL23;RPS6;RPS3A;EEF2;LDHA;TUBA1B;RPS19;PGK1;LCN2;TXNIP;P4HB;SLC38A2;CALM2
Rapamycin-20 uM in DMSO-Rat-Primary rat hepatocytes-1d-up	14/251	1.92095e-08	1.76746e-07	0	0	6.84379	121.6	HSPA8;TRAM1;NPM1;RPL23;ASNS;NAP1L1;YBX1;EEF2;LDHA;H1F0;TUBA1B;LCN2;RPS20;P4HB
2378-Tetrachlorodibenzo-P-Dioxin-0.02 mg/kg in CMC-Rat-Liver-3d-dn	15/294	1.93157e-08	1.77515e-07	0	0	6.26017	111.195	HSPA8;NQO1;RPL23;RPS6;ATP1B1;EEF2;ICAM1;VEGFA;RPS19;FTH1;FASN;CFL1;RPS20;SLC38A2;TPT1
4-Chloro-2-Nitroaniline-1200 mg/kg in CMC-Rat-Kidney-1d-dn	15/294	1.93157e-08	1.77308e-07	0	0	6.26017	111.195	TRAM1;RPS6;PLOD2;YBX1;EEF2;LDHA;H1F0;TUBA1B;RPS19;FTH1;SPP1;VIM;SLC38A2;CALM2;TGM2
Camptothecin-0.24 mg/kg in Saline-Rat-Bone marrow-1d-up	15/294	1.93157e-08	1.77101e-07	0	0	6.26017	111.195	TRAM1;NPM1;RPL10;RPL23;RPS6;YBX1;EEF2;TUBA1B;RPS19;FTH1;CFL1;RPS20;CALM2;TPT1;RAI14
Catechol-40 mg/kg in Saline-Rat-Kidney-3d-dn	15/294	1.93157e-08	1.76896e-07	0	0	6.26017	111.195	RPL23;IGFBP3;RPS6;RPS3A;YBX1;EEF2;LDHA;RPS19;PLAU;PSAT1;FTH1;CFL1;SPP1;TPT1;TGM2
Digoxin-11 mg/kg in Corn Oil-Rat-Liver-0.25d-dn	15/294	1.93157e-08	1.7669e-07	0	0	6.26017	111.195	RPS6;RPS3A;ICAM1;VEGFA;C3;FADS2;LDHA;RPS19;FASN;PGK1;TXNIP;RPS20;P4HB;TPT1;TGM2
Ethinylestradiol-1480 mg/kg in Corn Oil-Rat-Liver-1d-up	15/294	1.93157e-08	1.76485e-07	0	0	6.26017	111.195	ABCC3;HSPA8;NQO1;NPM1;RPL23;RPS6;RPS3A;TUBA1B;RPS19;PSAT1;CFL1;PGK1;RPS20;CALM2;RAI14
NN-Dimethylformamide-1400 mg/kg in Saline-Rat-Liver-1d-dn	15/294	1.93157e-08	1.76281e-07	0	0	6.26017	111.195	TRAM1;RPL10;RPL23;RPS6;RPS3A;ICAM1;VEGFA;FADS2;LDHA;RPS19;PLAU;PSMD3;TXNIP;RPS20;CALM2
Rapamycin-60 mg/kg in CMC-Rat-Heart-1d-dn	15/294	1.93157e-08	1.76077e-07	0	0	6.26017	111.195	ITGB1;HSPA8;NPM1;RPL10;RPL23;PLOD2;ATP1B1;CTGF;VEGFA;LDHA;TUBA1B;TXNIP;P4HB;SLC38A2;TGM2
Safrole-488 mg/kg in Corn Oil-Rat-Liver-0.25d-up	15/294	1.93157e-08	1.75873e-07	0	0	6.26017	111.195	HSPA8;NQO1;NPM1;RPL10;RPL23;IGFBP3;RPS6;ATP1B1;ICAM1;VEGFA;C3;LDHA;RPS19;PSMD3;SLC38A2
6-Mercaptopurine-25 mg/kg in Corn Oil-Rat-Liver-1d-up	16/340	1.9825e-08	1.80302e-07	0	0	5.77409	102.411	HSPA8;NQO1;RPL10;RPL23;EEF2;FADS2;LDHA;RPS19;FTH1;CFL1;PGK1;RPS20;P4HB;CALM2;TPT1;TGM2
Fluocinolone Acetonide-2.5 mg/kg in Corn Oil-Rat-Kidney-5d-up	16/340	1.9825e-08	1.80094e-07	0	0	5.77409	102.411	HSPA8;JUN;GPX2;NPM1;RPL10;RPL23;RPS6;ATP1B1;VEGFA;LDHA;PSAT1;PGK1;LCN2;RPS20;ITGAV;TPT1
Phenacetin-619 mg/kg in Corn Oil-Rat-Kidney-5d-dn	16/340	1.9825e-08	1.79887e-07	0	0	5.77409	102.411	HSPA8;JUN;RPL10;RPL23;RPS6;RPS3A;ATP1B1;LDHA;PSAT1;FTH1;PGK1;RPS20;P4HB;CALM2;TPT1;TGM2
Diethylstilbestrol-2.8 mg/kg in Corn Oil-Rat-Kidney-3d-up	14/252	2.01976e-08	1.83057e-07	0	0	6.81663	120.775	HSPA8;NPM1;RPL10;RPS3A;LDHA;H1F0;RPS19;FTH1;PSMD3;SPP1;RPS20;P4HB;CALM2;TPT1
Droperidol-94 mg/kg in CMC-Rat-Heart-3d-dn	15/295	2.02085e-08	1.82945e-07	0	0	6.23895	110.537	ITGB1;NPM1;RPL23;IGFBP3;ATP1B1;VEGFA;TUBA1B;CFL1;PGK1;TXNIP;RPS20;VIM;P4HB;SLC38A2;CALM2
Ethanol-6000 mg/kg in Saline-Rat-Liver-1d-up	15/295	2.02085e-08	1.82735e-07	0	0	6.23895	110.537	HSPA8;TRAM1;NPM1;RPL10;RPL23;YBX1;EEF2;C3;TUBA1B;PLAU;FTH1;CFL1;CALM2;TPT1;RAI14
Lomustine-8.75 mg/kg in Corn Oil-Rat-Bone marrow-3d-dn	15/295	2.02085e-08	1.82526e-07	0	0	6.23895	110.537	HSPA8;TRAM1;NPM1;RPL10;RPL23;AKAP12;LDHA;TUBA1B;RPS19;FTH1;CFL1;PGK1;LCN2;VIM;CALM2
Methyl Methanesulfonate-113 mg/kg in Water-Rat-Bone marrow-5d-dn	15/295	2.02085e-08	1.82317e-07	0	0	6.23895	110.537	HSPA8;JUN;RPL10;RPL23;RPS3A;H1F0;TUBA1B;FTH1;LCN2;TXNIP;RPS20;VIM;CALM2;TPT1;RAI14
Ofloxacin-30 mg/kg in Water-Rat-Heart-5d-up	15/295	2.02085e-08	1.82108e-07	0	0	6.23895	110.537	HSPA8;NPM1;RPS6;RPS3A;YBX1;ATP1B1;VEGFA;LDHA;FTH1;CFL1;TXNIP;RPS20;VIM;CALM2;TPT1
Albendazole-62 mg/kg in Corn Oil-Rat-Liver-1d-up	15/296	2.11388e-08	1.90274e-07	0	0	6.21787	109.883	NQO1;RPL23;RPS6;YBX1;IFIT2;TUBA1B;RPS19;FTH1;CFL1;LCN2;RPS20;P4HB;CALM2;TPT1;RAI14
Amikacin-20 mg/kg in Saline-Rat-Bone marrow-1d-up	15/296	2.11388e-08	1.90056e-07	0	0	6.21787	109.883	TRAM1;NPM1;RPL10;RPL23;RPS6;ASNS;RPS3A;LDHA;RPS19;LCN2;TXNIP;VIM;P4HB;SLC38A2;CALM2
Amineptine-1667 uM in DMSO-Rat-Primary rat hepatocytes-0.67d-up	15/296	2.11388e-08	1.8984e-07	0	0	6.21787	109.883	ITGB1;NQO1;NPM1;RPL10;RPL23;RPS6;ASNS;YBX1;VEGFA;RPS19;PSAT1;LCN2;RPS20;P4HB;SLC38A2
Bis(2-Ethylhexyl)Phthalate-100 mg/kg in Corn Oil-Rat-Liver-0.25d-up	15/296	2.11388e-08	1.89624e-07	0	0	6.21787	109.883	JUN;NPM1;RPL10;IGFBP3;RPS6;ASNS;YBX1;C3;TUBA1B;RPS19;FTH1;PSMD3;PGK1;P4HB;CALM2
Chlorpyrifos-82 mg/kg in CMC-Rat-Heart-3d-dn	15/296	2.11388e-08	1.89408e-07	0	0	6.21787	109.883	NPM1;RPL10;RPL23;RPS6;RPS3A;LDHA;TUBA1B;RPS19;PGK1;RPS20;VIM;P4HB;SLC38A2;CALM2;TPT1
Daunorubicin-3.25 mg/kg in Saline-Rat-Heart-5d-dn	15/296	2.11388e-08	1.89193e-07	0	0	6.21787	109.883	ITGB1;HSPA8;JUN;RPL10;RPS3A;ATP1B1;VEGFA;LDHA;TUBA1B;FTH1;CFL1;TXNIP;VIM;CALM2;TPT1
Fluoxetine-52 mg/kg in CMC-Rat-Liver-5d-dn	15/296	2.11388e-08	1.88978e-07	0	0	6.21787	109.883	HSPA8;JUN;NPM1;RPL23;RPS6;ICAM1;FADS2;LDHA;FTH1;FASN;PGK1;TXNIP;RPS20;SLC38A2;TPT1
Levofloxacin-739 mg/kg in Water-Rat-Heart-5d-up	15/296	2.11388e-08	1.88764e-07	0	0	6.21787	109.883	ITGB1;HSPA8;TPM1;RPS3A;YBX1;ICAM1;CTGF;VEGFA;LDHA;FTH1;TXNIP;VIM;P4HB;CALM2;TPT1
Mianserin-116 mg/kg in Corn Oil-Rat-Heart-5d-up	15/296	2.11388e-08	1.8855e-07	0	0	6.21787	109.883	ITGB1;HSPA8;NPM1;RPL10;IGFBP3;TPM1;YBX1;FTH1;CFL1;TXNIP;RPS20;VIM;SLC38A2;TPT1;TGM2
N-Nitrosodiethylamine-34 mg/kg in Saline-Rat-Kidney-5d-up	15/296	2.11388e-08	1.88336e-07	0	0	6.21787	109.883	HSPA8;RPL10;IGFBP3;RPS6;RPS3A;NAP1L1;YBX1;ATP1B1;H1F0;RPS19;FTH1;TXNIP;RPS20;P4HB;TPT1
Atorvastatin-300 mg/kg in Corn Oil-Rat-Liver-3d-up	15/297	2.2108e-08	1.96749e-07	0	0	6.19694	109.235	NPM1;RPL10;RPS6;RPS3A;FADS2;LDHA;TUBA1B;RPS19;FASN;CFL1;LCN2;RPS20;P4HB;CALM2;RAI14
Carbimazole-400 mg/kg in Water-Rat-Liver-5d-up	15/297	2.2108e-08	1.96527e-07	0	0	6.19694	109.235	ABCC3;HSPA8;NQO1;NPM1;RPL10;RPL23;RPS6;RPS3A;ATP1B1;VEGFA;RPS19;PSAT1;FTH1;RPS20;P4HB
Hydralazine-280 mg/kg in Water-Rat-Liver-5d-dn	15/297	2.2108e-08	1.96305e-07	0	0	6.19694	109.235	HSPA8;TRAM1;NPM1;RPL23;IGFBP3;RPS6;EEF2;ICAM1;VEGFA;LDHA;H1F0;RPS19;FASN;TXNIP;TPT1
Manganese (II) Chloride-700 mg/kg in Water-Rat-Liver-3d-dn	14/254	2.23133e-08	1.97905e-07	0	0	6.76296	119.15	HSPA8;TRAM1;NPM1;RPL23;RPS3A;LDHA;TUBA1B;RPS19;FTH1;FASN;CFL1;TXNIP;P4HB;TPT1
Citalopram-90 mg/kg in Corn Oil-Rat-Heart-3d-up	16/343	2.24146e-08	1.9858e-07	0	0	5.72359	100.813	ITGB1;TRAM1;RPL10;RPL23;RPS6;RPS3A;ATP1B1;LDHA;RPS19;FTH1;PGK1;RPS20;VIM;P4HB;CALM2;TPT1
Prednisolone-184 mg/kg in Water-Rat-Heart-5d-dn	16/343	2.24146e-08	1.98357e-07	0	0	5.72359	100.813	HSPA8;RPL10;RPL23;TPM1;RPS6;RPS3A;CTGF;LDHA;RPS19;FTH1;CFL1;PGK1;RPS20;CALM2;TPT1;TGM2
Alfacalcidol-0.043 mg/kg in CMC-Rat-Liver-3d-up	15/298	2.31175e-08	2.04347e-07	0	0	6.17614	108.593	NQO1;JUN;TRAM1;RPL10;STAT1;RPS3A;ATP1B1;IFIT2;ICAM1;C3;CFL1;LCN2;SLC38A2;TPT1;TGM2
Bromobenzene-439 mg/kg in CMC-Rat-Kidney-3d-up	15/298	2.31175e-08	2.04118e-07	0	0	6.17614	108.593	NPM1;RPL23;RPS6;RPS3A;YBX1;ATP1B1;CTGF;LDHA;H1F0;FTH1;PGK1;SPP1;TXNIP;SLC38A2;TGM2
Busulfan-3 mg/kg in Corn Oil-Rat-Bone marrow-0.25d-dn	15/298	2.31175e-08	2.03889e-07	0	0	6.17614	108.593	TRAM1;NPM1;RPL10;RPL23;RPS6;LDHA;TUBA1B;RPS19;CFL1;PSMD3;PGK1;P4HB;SLC38A2;CALM2;TPT1
Etodolac-24 mg/kg in CMC-Rat-Liver-5d-up	15/298	2.31175e-08	2.03661e-07	0	0	6.17614	108.593	HSPA8;NQO1;RPL10;RPL23;RPS6;RPS3A;C3;RPS19;FTH1;CFL1;LCN2;VIM;P4HB;SLC38A2;TGM2
Fenoprofen-52 mg/kg in Corn Oil-Rat-Kidney-1d-up	15/298	2.31175e-08	2.03434e-07	0	0	6.17614	108.593	ITGB1;GPX2;RPL10;RPS6;RPS3A;VEGFA;LDHA;RPS19;FTH1;LCN2;SPP1;RPS20;VIM;CALM2;TGM2
Ketoconazole-25 mg/kg in Corn Oil-Rat-Liver-3d-dn	15/298	2.31175e-08	2.03207e-07	0	0	6.17614	108.593	HSPA8;NQO1;TRAM1;RPL10;RPL23;RPS6;RPS3A;EEF2;C3;FADS2;H1F0;RPS19;FASN;PGK1;P4HB
Sulfadoxine-12 mg/kg in Corn Oil-Rat-Liver-3d-dn	15/298	2.31175e-08	2.0298e-07	0	0	6.17614	108.593	HSPA8;JUN;RPL10;IGFBP3;RPS6;YBX1;EEF2;VEGFA;C3;FADS2;LDHA;FTH1;FASN;TPT1;TGM2
Azathioprine-20 mg/kg in Corn Oil-Rat-Liver-1d-dn	15/299	2.41687e-08	2.11974e-07	0	0	6.15549	107.956	HSPA8;NPM1;RPL10;RPL23;IGFBP3;RPS6;RPS3A;YBX1;C3;LDHA;FTH1;FASN;P4HB;SLC38A2;TPT1
Cytarabine-23 mg/kg in Saline-Rat-Spleen-3d-up	15/299	2.41687e-08	2.11738e-07	0	0	6.15549	107.956	HSPA8;TRAM1;NPM1;RPL10;STAT1;RPL23;ASNS;LDHA;TUBA1B;RPS19;FTH1;PGK1;RPS20;P4HB;SLC38A2
Diethylstilbestrol-280 mg/kg in Corn Oil-Rat-Kidney-5d-up	15/299	2.41687e-08	2.11503e-07	0	0	6.15549	107.956	HSPA8;NQO1;RPL10;RPL23;RPS3A;ATP1B1;VEGFA;LDHA;RPS19;PSMD3;SPP1;TXNIP;RPS20;P4HB;TPT1
Leflunomide-30 mg/kg in Corn Oil-Rat-Liver-3d-dn	15/299	2.41687e-08	2.11268e-07	0	0	6.15549	107.956	ITGB1;HSPA8;TRAM1;RPL10;RPL23;IGFBP3;RPS6;VEGFA;C3;RPS19;FASN;PGK1;RPS20;P4HB;TGM2
Praziquantel-1200 mg/kg in CMC-Rat-Liver-3d-dn	15/299	2.41687e-08	2.11034e-07	0	0	6.15549	107.956	HSPA8;RPL23;IGFBP3;RPS3A;YBX1;ICAM1;VEGFA;C3;FADS2;LDHA;H1F0;FTH1;FASN;RPS20;TPT1
Promethazine-113 mg/kg in Saline-Rat-Liver-5d-dn	15/299	2.41687e-08	2.10801e-07	0	0	6.15549	107.956	RPL10;STAT1;IGFBP3;RPS6;RPS3A;YBX1;ATP1B1;ICAM1;VEGFA;C3;LDHA;H1F0;SLC38A2;TPT1;RAI14
Sulfisoxazole-250 mg/kg in Corn Oil-Rat-Liver-1d-up	15/299	2.41687e-08	2.10567e-07	0	0	6.15549	107.956	HSPA8;NPM1;RPL10;RPS3A;YBX1;EEF2;ICAM1;C3;FADS2;RPS19;PSMD3;RPS20;CALM2;TPT1;RAI14
Valproic Acid-1500 mg/kg in Water-Rat-Heart-5d-up	15/299	2.41687e-08	2.10335e-07	0	0	6.15549	107.956	HSPA8;NPM1;RPL10;STAT1;RPL23;IGFBP3;RPS6;RPS3A;YBX1;ALDH3A1;RPS19;FTH1;TXNIP;RPS20;TPT1
Cyproheptadine-37 mg/kg in CMC-Rat-Heart-1d-dn	12/177	2.41742e-08	2.1015e-07	0	0	8.3186	145.891	LDHA;H1F0;RPL10;RPL23;IGFBP3;TPM1;RPS6;TXNIP;RPS3A;VIM;CTGF;TGM2
Clomipramine-7 uM in DMSO-Rat-Primary rat hepatocytes-0.67d-up	17/394	2.50542e-08	2.1756e-07	0	0	5.29414	92.6591	ITGB1;HSPA8;NQO1;NPM1;RPL10;RPL23;RPS6;ASNS;EEF2;CTGF;VEGFA;C3;TUBA1B;RPS19;FTH1;P4HB;TPT1
Cisplatin-2 mg/kg in Saline-Rat-Bone marrow-1d-dn	15/300	2.52634e-08	2.19135e-07	0	0	6.13497	107.325	HSPA8;NPM1;RPL10;RPL23;RPS6;ASNS;RPS3A;NAP1L1;YBX1;LDHA;H1F0;TUBA1B;PGK1;LCN2;VIM
Ethanol-3000 mg/kg in Saline-Rat-Liver-3d-up	15/300	2.52634e-08	2.18893e-07	0	0	6.13497	107.325	HSPA8;NQO1;RPL23;RPS6;RPS3A;C3;FADS2;H1F0;RPS19;PLAU;FTH1;PGK1;RPS20;P4HB;SLC38A2
Lovastatin-1500 mg/kg in Corn Oil-Rat-Skeletal muscle-5d-up	15/300	2.52634e-08	2.18653e-07	0	0	6.13497	107.325	HSPA8;NQO1;NPM1;RPL10;RPL23;RPS6;RPS3A;NAP1L1;YBX1;H1F0;RPS19;PSMD3;TXNIP;RPS20;TPT1
Minoxidil-83 mg/kg in CMC-Rat-Heart-3d-up	15/300	2.52634e-08	2.18413e-07	0	0	6.13497	107.325	NPM1;ANXA2;RPL10;RPS6;PLOD2;LDHA;H1F0;RPS19;FTH1;CFL1;PSMD3;RPS20;P4HB;CALM2;TGM2
Naloxone-76 mg/kg in Saline-Rat-Liver-3d-dn	15/300	2.52634e-08	2.18173e-07	0	0	6.13497	107.325	TRAM1;RPS6;EEF2;ICAM1;C3;FADS2;RPS19;FTH1;FASN;CFL1;PGK1;P4HB;CALM2;TPT1;TGM2
Roflumilast-17 mg/kg in CMC-Rat-Liver-3d-up	15/300	2.52634e-08	2.17934e-07	0	0	6.13497	107.325	NQO1;TRAM1;RPL23;RPS6;RPS3A;ICAM1;C3;FTH1;LCN2;TXNIP;RPS20;P4HB;SLC38A2;TPT1;TGM2
Sertraline-23 uM in DMSO-Rat-Primary rat hepatocytes-0.67d-up	15/300	2.52634e-08	2.17696e-07	0	0	6.13497	107.325	HSPA8;NPM1;RPL10;RPS6;ASNS;RPS3A;ATP1B1;LDHA;TUBA1B;PSAT1;FTH1;FASN;LCN2;RPS20;P4HB
Labetalol-60 mg/kg in Water-Rat-Heart-3d-up	16/346	2.531e-08	2.1786e-07	0	0	5.67396	99.2493	HSPA8;NPM1;RPL10;RPL23;RPS6;ATP1B1;CTGF;VEGFA;RPS19;FTH1;CFL1;TXNIP;RPS20;VIM;P4HB;TGM2
Stanozolol-39 mg/kg in Water-Rat-Liver-0.25d-up	16/346	2.531e-08	2.17622e-07	0	0	5.67396	99.2493	HSPA8;NQO1;NPM1;RPL10;RPS6;RPS3A;EEF2;VEGFA;C3;RPS19;FTH1;PGK1;TXNIP;RPS20;P4HB;SLC38A2
Sulindac-23 mg/kg in Corn Oil-Rat-Kidney-3d-dn	16/346	2.531e-08	2.17385e-07	0	0	5.67396	99.2493	ITGB1;RPL10;RPS6;RPS3A;YBX1;VEGFA;RPS19;PSAT1;FTH1;CFL1;PGK1;SPP1;RPS20;CALM2;TPT1;TGM2
Busulfan-3 mg/kg in Corn Oil-Rat-Liver-0.25d-dn	15/301	2.64029e-08	2.26525e-07	0	0	6.11459	106.698	RPL23;RPS3A;YBX1;ICAM1;VEGFA;C3;LDHA;PLAU;FTH1;CFL1;PGK1;RPS20;CALM2;TPT1;RAI14
Captopril-1750 mg/kg in Water-Rat-Kidney-5d-up	15/301	2.64029e-08	2.26278e-07	0	0	6.11459	106.698	GPX2;RPL10;RPL23;RPS6;RPS3A;ATP1B1;CTGF;LDHA;RPS19;FTH1;LCN2;SPP1;TXNIP;RPS20;CALM2
Carboplatin-14 mg/kg in Saline-Rat-Kidney-3d-up	15/301	2.64029e-08	2.26032e-07	0	0	6.11459	106.698	ITGB1;NQO1;RPL10;RPS6;ATP1B1;CTGF;LDHA;TUBA1B;RPS19;PLAU;CFL1;SPP1;SLC38A2;TPT1;TGM2
Fluocinolone Acetonide-2.5 mg/kg in Corn Oil-Rat-Heart-3d-dn	15/301	2.64029e-08	2.25787e-07	0	0	6.11459	106.698	ITGB1;RPL23;TPM1;RPS6;RPS3A;YBX1;ATP1B1;VEGFA;LDHA;RPS19;CFL1;VIM;P4HB;CALM2;TPT1
Ibuprofen-263 mg/kg in Corn Oil-Rat-Liver-3d-up	15/301	2.64029e-08	2.25542e-07	0	0	6.11459	106.698	HSPA8;STAT1;RPL23;IFIT2;ICAM1;C3;LDHA;TUBA1B;RPS19;FTH1;LCN2;RPS20;TPT1;TGM2;RAI14
Ibuprofen-54 mg/kg in Corn Oil-Rat-Liver-1d-up	15/301	2.64029e-08	2.25297e-07	0	0	6.11459	106.698	TRAM1;RPL10;RPL23;RPS6;ICAM1;C3;FADS2;TUBA1B;RPS19;PLAU;FTH1;RPS20;P4HB;TPT1;RAI14
Meloxicam-33 mg/kg in Corn Oil-Rat-Liver-1d-up	15/301	2.64029e-08	2.25054e-07	0	0	6.11459	106.698	HSPA8;NQO1;TRAM1;RPL23;RPS3A;ATP1B1;ICAM1;C3;RPS19;PSMD3;LCN2;TXNIP;RPS20;P4HB;SLC38A2
Nevirapine-29 mg/kg in Saline-Rat-Liver-5d-dn	15/301	2.64029e-08	2.2481e-07	0	0	6.11459	106.698	JUN;ANXA2;RPS6;RPS3A;ATP1B1;EEF2;C3;LDHA;H1F0;RPS19;PLAU;FASN;PGK1;SLC38A2;TPT1
Tranilast-300 mg/kg in CMC-Rat-Heart-1d-dn	15/301	2.64029e-08	2.24568e-07	0	0	6.11459	106.698	HSPA8;RPL10;RPL23;IGFBP3;RPS6;CTGF;VEGFA;LDHA;TUBA1B;RPS19;FTH1;VIM;SLC38A2;CALM2;TGM2
Azathioprine-160 mg/kg in Corn Oil-Rat-Liver-3d-dn	16/348	2.7426e-08	2.33017e-07	0	0	5.64135	98.2259	HSPA8;JUN;TRAM1;NPM1;RPL10;RPL23;IGFBP3;RPS6;RPS3A;EEF2;C3;LDHA;RPS19;PGK1;P4HB;TPT1
2-Acetylaminofluorene-30 mg/kg in CMC-Rat-Liver-1d-up	15/302	2.75891e-08	2.34151e-07	0	0	6.09434	106.077	HSPA8;NPM1;RPL10;RPL23;IGFBP3;RPS6;YBX1;EEF2;ICAM1;RPS19;FTH1;CFL1;VIM;P4HB;TPT1
Alpha-Naphthoflavone-80 mg/kg in CMC-Rat-Liver-91d-dn	15/302	2.75891e-08	2.33899e-07	0	0	6.09434	106.077	HSPA8;NPM1;RPL10;RPL23;IGFBP3;RPS6;RPS3A;ATP1B1;EEF2;ICAM1;VEGFA;RPS19;PGK1;RPS20;SLC38A2
Atenolol-1000 mg/kg in CMC-Rat-Heart-3d-dn	15/302	2.75891e-08	2.33647e-07	0	0	6.09434	106.077	IGFBP3;RPS6;YBX1;EEF2;CTGF;LDHA;H1F0;TUBA1B;PGK1;TXNIP;RPS20;VIM;SLC38A2;CALM2;TPT1
Chloroform-600 mg/kg in Water-Rat-Liver-1d-up	15/302	2.75891e-08	2.33396e-07	0	0	6.09434	106.077	HSPA8;NQO1;TRAM1;RPL10;RPL23;RPS6;ATP1B1;ICAM1;VEGFA;FADS2;LCN2;RPS20;P4HB;SLC38A2;TPT1
Indomethacin-12 mg/kg in Water-Rat-Liver-0.25d-up	15/302	2.75891e-08	2.33146e-07	0	0	6.09434	106.077	NQO1;TRAM1;NPM1;RPL23;RPS6;ATP1B1;ICAM1;VEGFA;C3;RPS19;PGK1;LCN2;TXNIP;RPS20;SLC38A2
Mestranol-250 mg/kg in CMC-Rat-Liver-5d-up	15/302	2.75891e-08	2.32896e-07	0	0	6.09434	106.077	NQO1;NPM1;RPL10;RPL23;RPS6;RPS3A;VEGFA;RPS19;FTH1;CFL1;RPS20;P4HB;CALM2;TPT1;TGM2
Chlorpromazine-43.9 uM in DMSO-Rat-Primary rat hepatocytes-0.67d-up	15/303	2.88236e-08	2.43057e-07	0	0	6.07423	105.461	HSPA8;NQO1;NPM1;RPL10;RPL23;RPS6;ASNS;RPS3A;LDHA;PSAT1;FASN;PGK1;RPS20;P4HB;SLC38A2
Cimetidine-2000 mg/kg in CMC-Rat-Heart-5d-up	15/303	2.88236e-08	2.42797e-07	0	0	6.07423	105.461	ANXA2;TPM1;RPS6;RPS3A;YBX1;CTGF;VEGFA;ALDH3A1;LDHA;FTH1;CFL1;RPS20;SLC38A2;CALM2;TPT1
Clonazepam-2500 mg/kg in CMC-Rat-Heart-3d-dn	15/303	2.88236e-08	2.42537e-07	0	0	6.07423	105.461	RPL10;TPM1;RPS6;RPS3A;ATP1B1;CTGF;LDHA;TUBA1B;RPS19;FTH1;PGK1;VIM;P4HB;SLC38A2;CALM2
DActinomycin-0.06 mg/kg in Saline-Rat-Bone marrow-0.25d-up	15/303	2.88236e-08	2.42279e-07	0	0	6.07423	105.461	NPM1;RPL10;RPL23;RPS6;RPS3A;AKAP12;TUBA1B;RPS19;FTH1;CFL1;TXNIP;VIM;SLC38A2;CALM2;TPT1
Prednisone-68 mg/kg in CMC-Rat-Kidney-1d-dn	15/303	2.88236e-08	2.4202e-07	0	0	6.07423	105.461	ITGB1;RPL23;IGFBP3;RPS3A;YBX1;ATP1B1;TUBA1B;RPS19;PSAT1;FTH1;CFL1;PGK1;SPP1;CALM2;RAI14
Quetiapine-500 mg/kg in CMC-Rat-Liver-5d-dn	15/303	2.88236e-08	2.41763e-07	0	0	6.07423	105.461	HSPA8;NQO1;TRAM1;NPM1;RPS3A;YBX1;C3;FADS2;LDHA;H1F0;RPS19;FTH1;FASN;CFL1;PGK1
Sulconazole-1200 mg/kg in Corn Oil-Rat-Liver-1d-dn	15/303	2.88236e-08	2.41505e-07	0	0	6.07423	105.461	TRAM1;NPM1;RPL10;RPL23;RPS6;RPS3A;ATP1B1;ICAM1;FTH1;PGK1;TXNIP;P4HB;SLC38A2;CALM2;TPT1
Timolol-10 mg/kg in Water-Rat-Heart-1d-dn	15/303	2.88236e-08	2.41249e-07	0	0	6.07423	105.461	NPM1;RPL10;RPL23;RPS6;YBX1;ATP1B1;EEF2;VEGFA;TUBA1B;FTH1;CFL1;PGK1;TXNIP;SLC38A2;TPT1
Atropine-94 mg/kg in Water-Rat-Heart-3d-dn	16/350	2.97024e-08	2.4834e-07	0	0	5.60911	97.2174	RPL10;RPL23;TPM1;RPS6;RPS3A;ATP1B1;VEGFA;LDHA;TUBA1B;PGK1;RPS20;P4HB;SLC38A2;CALM2;TPT1;TGM2
Acetaminophen-100 mg/kg in Corn Oil-Rat-Liver-1d-dn	14/260	2.99223e-08	2.49913e-07	0	0	6.60689	114.462	RPL10;RPS6;RPS3A;EEF2;ICAM1;VEGFA;LDHA;FTH1;FASN;CFL1;PGK1;P4HB;TPT1;RAI14
Cyclosporin A-70 mg/kg in Corn Oil-Rat-Liver-1d-up	15/304	3.01082e-08	2.512e-07	0	0	6.05425	104.85	HSPA8;TRAM1;NPM1;RPL23;ICAM1;C3;FADS2;RPS19;PLAU;FTH1;FASN;CFL1;TXNIP;RPS20;P4HB
Diazepam-710 mg/kg in CMC-Rat-Heart-5d-dn	15/304	3.01082e-08	2.50934e-07	0	0	6.05425	104.85	HSPA8;RPL10;TPM1;RPS6;EEF2;CTGF;VEGFA;LDHA;TUBA1B;FTH1;CFL1;PGK1;VIM;P4HB;TGM2
Doxorubicin-1.5 uM in DMSO-Rat-Primary rat hepatocytes-0.67d-up	15/304	3.01082e-08	2.50669e-07	0	0	6.05425	104.85	HSPA8;NQO1;RPL23;RPS6;RPS3A;YBX1;ATP1B1;EEF2;VEGFA;C3;LDHA;RPS19;FTH1;PGK1;RPS20
Ferulic Acid-1500 mg/kg in CMC-Rat-Liver-5d-up	15/304	3.01082e-08	2.50404e-07	0	0	6.05425	104.85	NQO1;NPM1;RPL10;RPS6;FADS2;TUBA1B;FTH1;FASN;CFL1;PGK1;RPS20;VIM;P4HB;SLC38A2;CALM2
Mefenamic Acid-93 mg/kg in Corn Oil-Rat-Liver-0.25d-dn	15/304	3.01082e-08	2.5014e-07	0	0	6.05425	104.85	RPL10;RPL23;EEF2;ICAM1;VEGFA;FADS2;PLAU;FTH1;FASN;PGK1;TXNIP;RPS20;P4HB;TPT1;RAI14
NN-Dimethylformamide-1400 mg/kg in Saline-Rat-Liver-5d-up	15/304	3.01082e-08	2.49876e-07	0	0	6.05425	104.85	HSPA8;NQO1;NPM1;RPL10;RPL23;RPS6;ICAM1;VEGFA;TUBA1B;PLAU;FTH1;PSMD3;LCN2;RPS20;SLC38A2
Tamoxifen-64 mg/kg in Corn Oil-Rat-Liver-0.25d-dn	15/304	3.01082e-08	2.49613e-07	0	0	6.05425	104.85	HSPA8;TRAM1;RPL10;ICAM1;C3;FADS2;LDHA;FTH1;FASN;PSMD3;RPS20;P4HB;TPT1;TGM2;RAI14
Epinephrine-0.0375 mg/kg in Saline-Rat-Heart-3d-dn	13/219	3.02651e-08	2.50649e-07	0	0	7.28353	126.102	ITGB1;HSPA8;JUN;ATP1B1;CTGF;VEGFA;TUBA1B;RPS19;TXNIP;RPS20;P4HB;SLC38A2;TPT1
(R)-Bicalutamide-1400 mg/kg in CMC-Rat-Kidney-5d-up	16/351	3.09042e-08	2.55674e-07	0	0	5.59313	96.7186	HSPA8;GPX2;NPM1;RPL10;RPS6;YBX1;CTGF;TUBA1B;RPS19;PSAT1;CFL1;SPP1;P4HB;CALM2;TPT1;TGM2
N-Nitrosodimethylamine-10 mg/kg in Saline-Rat-Liver-1d-up	16/351	3.09042e-08	2.55406e-07	0	0	5.59313	96.7186	FDPS;HSPA8;NQO1;JUN;NPM1;RPL10;RPS3A;ICAM1;LDHA;RPS19;FTH1;CFL1;LCN2;P4HB;TPT1;TGM2
Bromobenzene-439 mg/kg in CMC-Rat-Kidney-1d-up	15/305	3.14447e-08	2.596e-07	0	0	6.0344	104.244	NPM1;RPL10;RPS6;RPS3A;YBX1;ATP1B1;FTH1;CFL1;PGK1;SPP1;TXNIP;SLC38A2;CALM2;TPT1;TGM2
Celecoxib-100 uM in DMSO-Rat-Primary rat hepatocytes-0.67d-up	15/305	3.14447e-08	2.59328e-07	0	0	6.0344	104.244	ITGB1;HSPA8;NPM1;RPL10;RPS6;ASNS;RPS3A;LDHA;H1F0;PSAT1;FTH1;PGK1;LCN2;RPS20;P4HB
Clonidine-6 mg/kg in Water-Rat-Heart-5d-up	15/305	3.14447e-08	2.59057e-07	0	0	6.0344	104.244	HSPA8;JUN;NPM1;RPL10;RPS6;RPS3A;YBX1;EEF2;VEGFA;TUBA1B;RPS19;FTH1;RPS20;SLC38A2;TPT1
Cyclosporin A-350 mg/kg in Corn Oil-Rat-Liver-5d-up	15/305	3.14447e-08	2.58786e-07	0	0	6.0344	104.244	HSPA8;TRAM1;RPL23;RPS6;C3;FADS2;H1F0;RPS19;FTH1;FASN;TXNIP;RPS20;P4HB;TPT1;RAI14
Diazepam-710 mg/kg in CMC-Rat-Liver-3d-up	15/305	3.14447e-08	2.58516e-07	0	0	6.0344	104.244	ABCC3;HSPA8;NQO1;JUN;NPM1;RPL10;RPS6;FADS2;TUBA1B;RPS19;FTH1;CFL1;PSMD3;P4HB;SLC38A2
Famciclovir-112 mg/kg in Saline-Rat-Bone marrow-3d-dn	15/305	3.14447e-08	2.58247e-07	0	0	6.0344	104.244	NPM1;RPL10;PLOD2;RPS3A;YBX1;TUBA1B;RPS19;LCN2;SPP1;RPS20;VIM;P4HB;SLC38A2;CALM2;TPT1
Melphalan-12 mg/kg in CMC-Rat-Spleen-3d-up	15/305	3.14447e-08	2.57978e-07	0	0	6.0344	104.244	ITGB1;TRAM1;GPX2;NPM1;RPL10;YBX1;CTGF;TUBA1B;RPS19;FTH1;PGK1;P4HB;SLC38A2;CALM2;TPT1
Norepinephrine-1.75 mg/kg in Saline-Rat-Heart-3d-up	15/305	3.14447e-08	2.57709e-07	0	0	6.0344	104.244	ITGB1;NPM1;RPL10;PLOD2;RPS3A;ATP1B1;LOXL2;LDHA;RPS19;SPP1;VIM;P4HB;CALM2;TPT1;TGM2
Procainamide-755 mg/kg in Water-Rat-Heart-1d-up	15/305	3.14447e-08	2.57441e-07	0	0	6.0344	104.244	ITGB1;RPL10;RPL23;TPM1;RPS3A;YBX1;ATP1B1;VEGFA;ALDH3A1;H1F0;RPS19;RPS20;VIM;CALM2;TPT1
Diethanolamine-620 mg/kg in Water-Rat-Kidney-5d-up	16/352	3.21503e-08	2.62945e-07	0	0	5.57724	96.2233	ITGB1;TRAM1;GPX2;NPM1;RPL23;PLOD2;ATP1B1;RPS19;PLAU;FTH1;PSMD3;SPP1;P4HB;TPT1;TGM2;RAI14
Gold Sodium Thiomalate-8 mg/kg in Saline-Rat-Kidney-14d-up	16/352	3.21503e-08	2.62672e-07	0	0	5.57724	96.2233	NPM1;RPL10;RPS6;RPS3A;EEF2;LDHA;H1F0;RPS19;FTH1;LCN2;SPP1;TXNIP;VIM;P4HB;CALM2;TPT1
N-Nitrosodiethylamine-7000 uM in DMSO-Rat-Primary rat hepatocytes-1d-dn	16/352	3.21503e-08	2.624e-07	0	0	5.57724	96.2233	NPM1;RPL23;RPS3A;CTGF;C3;LDHA;RPS19;PSAT1;FTH1;CFL1;LCN2;RPS20;P4HB;CALM2;TPT1;TGM2
6-Mercaptopurine-5 uM in DMSO-Rat-Primary rat hepatocytes-0.67d-up	15/306	3.2835e-08	2.67711e-07	0	0	6.01468	103.644	ITGB1;NPM1;ANXA2;RPL10;RPS3A;ATP1B1;CTGF;TUBA1B;CFL1;LCN2;ITGAV;P4HB;SLC38A2;CALM2;TPT1
Betamethasone-79 mg/kg in Corn Oil-Rat-Bone marrow-5d-up	15/306	3.2835e-08	2.67434e-07	0	0	6.01468	103.644	IGFBP3;RPS6;ASNS;YBX1;SLC7A5;LDHA;H1F0;TUBA1B;RPS19;FTH1;PGK1;LCN2;VIM;P4HB;SLC38A2
Catechol-40 mg/kg in Saline-Rat-Bone marrow-0.25d-dn	15/306	3.2835e-08	2.67157e-07	0	0	6.01468	103.644	HSPA8;TRAM1;NPM1;RPL10;RPL23;RPS6;RPS3A;LDHA;RPS19;FTH1;CFL1;PGK1;LCN2;RPS20;TPT1
Chloroquine-21.95 uM in DMSO-Rat-Primary rat hepatocytes-0.67d-up	15/306	3.2835e-08	2.66882e-07	0	0	6.01468	103.644	HSPA8;NPM1;RPL10;RPL23;RPS6;ASNS;RPS3A;CTGF;TUBA1B;PSAT1;FASN;PGK1;ITGAV;SLC38A2;TPT1
Cortisone-206 mg/kg in CMC-Rat-Liver-3d-dn	15/306	3.2835e-08	2.66607e-07	0	0	6.01468	103.644	JUN;TRAM1;RPL23;IGFBP3;RPS6;RPS3A;ATP1B1;FADS2;RPS19;FASN;CFL1;TXNIP;RPS20;CALM2;TPT1
Cyclophosphamide-25 mg/kg in Water-Rat-Bone marrow-3d-up	15/306	3.2835e-08	2.66332e-07	0	0	6.01468	103.644	HSPA8;NPM1;RPL10;RPS6;NAP1L1;YBX1;LDHA;TUBA1B;RPS19;FTH1;PGK1;LCN2;RPS20;VIM;CALM2
Lovastatin-450 mg/kg in Corn Oil-Rat-Kidney-1d-dn	15/306	3.2835e-08	2.66058e-07	0	0	6.01468	103.644	ITGB1;NPM1;RPL10;IGFBP3;YBX1;VEGFA;PSAT1;CFL1;PGK1;SPP1;TXNIP;P4HB;SLC38A2;TPT1;TGM2
Oxaprozin-1500 mg/kg in CMC-Rat-Kidney-5d-up	15/306	3.2835e-08	2.65785e-07	0	0	6.01468	103.644	HSPA8;TRAM1;NPM1;RPL10;RPL23;RPS6;FADS2;TUBA1B;RPS19;FASN;TXNIP;RPS20;P4HB;SLC38A2;TPT1
Primidone-750 mg/kg in CMC-Rat-Liver-5d-dn	15/306	3.2835e-08	2.65512e-07	0	0	6.01468	103.644	HSPA8;JUN;TRAM1;NPM1;RPL23;RPS6;RPS3A;ATP1B1;ICAM1;C3;H1F0;FTH1;TXNIP;RPS20;TPT1
Saquinavir-1500 mg/kg in CMC-Rat-Kidney-1d-dn	15/306	3.2835e-08	2.65239e-07	0	0	6.01468	103.644	TRAM1;NPM1;RPL10;RPL23;YBX1;LDHA;FTH1;CFL1;PGK1;SPP1;TXNIP;P4HB;SLC38A2;CALM2;TPT1
Sotalol-2000 mg/kg in Water-Rat-Heart-3d-up	15/306	3.2835e-08	2.64968e-07	0	0	6.01468	103.644	NPM1;ANXA2;RPL10;IGFBP3;RPS6;RPS3A;ATP1B1;EEF2;VEGFA;RPS19;FTH1;CFL1;RPS20;TPT1;TGM2
Zomepirac-11 mg/kg in Saline-Rat-Liver-3d-dn	15/306	3.2835e-08	2.64696e-07	0	0	6.01468	103.644	NPM1;RPL10;RPS6;ATP1B1;ICAM1;FADS2;LDHA;H1F0;TUBA1B;FTH1;FASN;TXNIP;P4HB;CALM2;TPT1
Aminosalicylic Acid-2337 mg/kg in CMC-Rat-Liver-5d-up	15/307	3.4281e-08	2.7607e-07	0	0	5.99508	103.048	HSPA8;NQO1;GPX2;NPM1;RPL10;RPL23;RPS6;RPS3A;RPS19;FTH1;CFL1;RPS20;P4HB;CALM2;TPT1
Bisphenol A-100 mg/kg in Corn Oil-Rat-Liver-5d-dn	15/307	3.4281e-08	2.75788e-07	0	0	5.99508	103.048	HSPA8;RPL10;RPS6;RPS3A;EEF2;C3;FADS2;LDHA;RPS19;PLAU;FTH1;FASN;TXNIP;CALM2;RAI14
Catechol-40 mg/kg in Saline-Rat-Bone marrow-1d-dn	15/307	3.4281e-08	2.75507e-07	0	0	5.99508	103.048	HSPA8;TRAM1;NPM1;RPL10;RPL23;RPS6;RPS3A;EEF2;LDHA;RPS19;FTH1;CFL1;RPS20;CALM2;TPT1
Chlordiazepoxide-196 mg/kg in Water-Rat-Heart-3d-up	15/307	3.4281e-08	2.75226e-07	0	0	5.99508	103.048	HSPA8;JUN;RPL23;TPM1;RPS6;RPS3A;YBX1;ATP1B1;VEGFA;RPS19;FTH1;TXNIP;VIM;SLC38A2;CALM2
Dicumarol-13 mg/kg in Corn Oil-Rat-Liver-3d-dn	15/307	3.4281e-08	2.74946e-07	0	0	5.99508	103.048	HSPA8;JUN;NPM1;RPL10;IGFBP3;RPS6;RPS3A;ATP1B1;H1F0;RPS19;FTH1;FASN;PGK1;P4HB;SLC38A2
Sulfadiazine-1170 mg/kg in Water-Rat-Liver-5d-dn	15/307	3.4281e-08	2.74666e-07	0	0	5.99508	103.048	HSPA8;TRAM1;RPL23;EEF2;ICAM1;C3;FADS2;LDHA;TUBA1B;FASN;PSMD3;PGK1;P4HB;TPT1;RAI14
Fluvastatin-94 mg/kg in Corn Oil-Rat-Kidney-5d-dn	14/263	3.45478e-08	2.76523e-07	0	0	6.53153	112.218	JUN;ATP1B1;CTGF;LDHA;H1F0;TUBA1B;PLAU;CFL1;PGK1;TXNIP;P4HB;SLC38A2;TPT1;TGM2
Prednisolone-184 mg/kg in Water-Rat-Liver-3d-dn	14/263	3.45478e-08	2.76242e-07	0	0	6.53153	112.218	HSPA8;TRAM1;NPM1;RPL10;RPL23;IGFBP3;RPS6;RPS3A;FADS2;LDHA;RPS19;RPS20;CALM2;TPT1
Acetaminophen-486 mg/kg in Corn Oil-Rat-Liver-5d-dn	15/308	3.57846e-08	2.85842e-07	0	0	5.97562	102.456	HSPA8;RPL10;RPL23;RPS6;RPS3A;ATP1B1;EEF2;C3;FADS2;LDHA;RPS19;FASN;PGK1;TPT1;RAI14
Erythromycin-1500 mg/kg in CMC-Rat-Kidney-1d-dn	15/308	3.57846e-08	2.85552e-07	0	0	5.97562	102.456	ITGB1;TRAM1;NPM1;RPL10;RPL23;RPS6;PLOD2;LDHA;H1F0;PSAT1;FTH1;PGK1;SPP1;RPS20;CALM2
Amikacin-160 mg/kg in Saline-Rat-Kidney-28d-up	16/355	3.61689e-08	2.88326e-07	0	0	5.53011	94.7589	ITGB1;GPX2;NPM1;RPL10;YBX1;LDHA;TUBA1B;RPS19;PLAU;FTH1;CFL1;PGK1;SPP1;P4HB;SLC38A2;CALM2
Camptothecin-5 mg/kg in Saline-Rat-Kidney-3d-dn	16/355	3.61689e-08	2.88034e-07	0	0	5.53011	94.7589	TRAM1;NPM1;RPL10;RPL23;IGFBP3;RPS6;RPS3A;YBX1;ATP1B1;EEF2;LDHA;RPS19;RPS20;VIM;SLC38A2;TGM2
Neomycin-877 mg/kg in Corn Oil-Rat-Kidney-1d-dn	14/264	3.6228e-08	2.88214e-07	0	0	6.50679	111.484	ITGB1;RPL10;RPL23;IGFBP3;RPS3A;YBX1;EEF2;VEGFA;RPS19;PSAT1;FTH1;SPP1;P4HB;TPT1
Amiodarone-37.04 uM in DMSO-Rat-Primary rat hepatocytes-0.67d-up	15/309	3.73481e-08	2.96825e-07	0	0	5.95628	101.87	NPM1;RPL23;RPS6;ASNS;RPS3A;CTGF;VEGFA;LDHA;PSAT1;FASN;PGK1;RPS20;P4HB;SLC38A2;TGM2
Cadmium Chloride-2 mg/kg in Saline-Rat-Kidney-14d-up	15/309	3.73481e-08	2.96526e-07	0	0	5.95628	101.87	NPM1;RPL10;RPL23;RPS6;RPS3A;LDHA;FTH1;SPP1;TXNIP;RPS20;ITGAV;P4HB;SLC38A2;CALM2;TPT1
Citalopram-90 mg/kg in Corn Oil-Rat-Liver-0.25d-up	15/309	3.73481e-08	2.96227e-07	0	0	5.95628	101.87	HSPA8;NQO1;NPM1;RPL23;RPS6;ASNS;RPS3A;ICAM1;C3;PSAT1;FTH1;PGK1;RPS20;P4HB;CALM2
Closantel-22 mg/kg in CMC-Rat-Liver-1d-up	15/309	3.73481e-08	2.95929e-07	0	0	5.95628	101.87	HSPA8;NPM1;RPL10;RPL23;RPS6;RPS3A;EEF2;C3;FADS2;LDHA;H1F0;RPS20;SLC38A2;CALM2;TPT1
Cyclosporin A-70 mg/kg in Corn Oil-Rat-Liver-5d-up	15/309	3.73481e-08	2.95632e-07	0	0	5.95628	101.87	ITGB1;TRAM1;NPM1;RPL23;ICAM1;VEGFA;C3;H1F0;RPS19;PLAU;PSAT1;FTH1;TXNIP;RPS20;P4HB
Diazepam-710 mg/kg in CMC-Rat-Heart-1d-dn	15/309	3.73481e-08	2.95335e-07	0	0	5.95628	101.87	HSPA8;RPL10;IGFBP3;RPS6;ATP1B1;LDHA;TUBA1B;RPS19;PGK1;TXNIP;VIM;SLC38A2;CALM2;TPT1;TGM2
Etoposide-188 mg/kg in Corn Oil-Rat-Kidney-5d-up	15/309	3.73481e-08	2.95039e-07	0	0	5.95628	101.87	RPL10;RPL23;RPS6;PLOD2;RPS3A;ATP1B1;VEGFA;LDHA;PSAT1;FTH1;SPP1;RPS20;P4HB;SLC38A2;TPT1
Ibuprofen-263 mg/kg in Corn Oil-Rat-Liver-5d-up	15/309	3.73481e-08	2.94743e-07	0	0	5.95628	101.87	HSPA8;RPL10;RPL23;RPS6;RPS3A;C3;RPS19;PLAU;FTH1;CFL1;LCN2;RPS20;P4HB;TPT1;RAI14
Methotrexate-0.3 mg/kg in Corn Oil-Rat-Kidney-3d-dn	15/309	3.73481e-08	2.94448e-07	0	0	5.95628	101.87	JUN;NPM1;RPS6;YBX1;ATP1B1;EEF2;LDHA;H1F0;TUBA1B;CFL1;PGK1;SPP1;CALM2;TPT1;TGM2
Noscapine-570 mg/kg in CMC-Rat-Spleen-5d-up	15/309	3.73481e-08	2.94153e-07	0	0	5.95628	101.87	HSPA8;TRAM1;NPM1;RPL10;RPS6;YBX1;EEF2;VEGFA;RPS19;FTH1;CFL1;PGK1;RPS20;P4HB;SLC38A2
Praziquantel-1200 mg/kg in CMC-Rat-Liver-1d-up	15/309	3.73481e-08	2.9386e-07	0	0	5.95628	101.87	HSPA8;NQO1;GPX2;NPM1;EEF2;TUBA1B;RPS19;PSAT1;FTH1;CFL1;PSMD3;PGK1;RPS20;P4HB;CALM2
Vecuronium Bromide-0.005 mg/kg in Saline-Rat-Heart-5d-up	15/309	3.73481e-08	2.93566e-07	0	0	5.95628	101.87	NPM1;RPL10;RPL23;RPS6;CTGF;LDHA;TUBA1B;RPS19;TXNIP;VIM;P4HB;SLC38A2;CALM2;TGM2;RAI14
Enrofloxacin-2000 mg/kg in CMC-Rat-Kidney-3d-dn	15/310	3.89734e-08	3.06036e-07	0	0	5.93707	101.289	HSPA8;TRAM1;RPL10;RPL23;CTGF;LDHA;H1F0;TUBA1B;RPS19;PSAT1;PGK1;SPP1;TXNIP;P4HB;CALM2
Ethanol-3000 mg/kg in Saline-Rat-Bone marrow-3d-dn	15/310	3.89734e-08	3.05732e-07	0	0	5.93707	101.289	HSPA8;NPM1;RPL10;RPS6;PLOD2;RPS3A;YBX1;SLC7A5;LDHA;FTH1;LCN2;SPP1;TXNIP;CALM2;TPT1
Gadopentetate Dimeglumine-125 mg/kg in Saline-Rat-Kidney-5d-dn	15/310	3.89734e-08	3.05427e-07	0	0	5.93707	101.289	HSPA8;NPM1;RPL10;RPL23;RPS6;PLOD2;RPS19;PLAU;CFL1;PGK1;SPP1;TXNIP;P4HB;SLC38A2;CALM2
Idarubicin-0.625 mg/kg in Saline-Rat-Heart-1d-dn	15/310	3.89734e-08	3.05124e-07	0	0	5.93707	101.289	HSPA8;RPL23;TPM1;RPS6;PLOD2;RPS3A;YBX1;ATP1B1;ICAM1;RPS19;PGK1;RPS20;VIM;CALM2;TPT1
Lincomycin-1200 mg/kg in CMC-Rat-Kidney-5d-up	15/310	3.89734e-08	3.04821e-07	0	0	5.93707	101.289	HSPA8;NPM1;RPL10;RPL23;RPS6;ATP1B1;H1F0;TUBA1B;RPS19;FTH1;CFL1;PGK1;P4HB;CALM2;TPT1
NN'-Diphenyl-P-Phenylenediamine-1000 mg/kg in CMC-Rat-Kidney-1d-dn	15/310	3.89734e-08	3.04518e-07	0	0	5.93707	101.289	ITGB1;NPM1;RPL10;RPL23;RPS6;YBX1;ATP1B1;EEF2;RPS19;PLAU;FTH1;PGK1;SPP1;RPS20;TGM2
Noscapine-570 mg/kg in CMC-Rat-Spleen-1d-up	15/310	3.89734e-08	3.04217e-07	0	0	5.93707	101.289	ITGB1;TRAM1;NPM1;RPL10;IGFBP3;YBX1;VEGFA;RPS19;FTH1;CFL1;PGK1;P4HB;SLC38A2;CALM2;TPT1
Saquinavir-1500 mg/kg in CMC-Rat-Kidney-5d-dn	15/310	3.89734e-08	3.03915e-07	0	0	5.93707	101.289	HSPA8;RPL10;RPL23;VEGFA;LDHA;H1F0;TUBA1B;PLAU;CFL1;PGK1;SPP1;TXNIP;P4HB;SLC38A2;TPT1
Lead (II) Acetate-200 mg/kg in Saline-Rat-Liver-5d-dn	16/357	3.90973e-08	3.0458e-07	0	0	5.49913	93.7999	TRAM1;RPL10;RPL23;YBX1;EEF2;VEGFA;C3;LDHA;TUBA1B;RPS19;FTH1;FASN;PGK1;RPS20;P4HB;TPT1
Tenidap-41 uM in DMSO-Rat-Primary rat hepatocytes-0.67d-up	14/266	3.98121e-08	3.09842e-07	0	0	6.45786	110.036	NPM1;RPL10;RPL23;ASNS;RPS3A;YBX1;CTGF;VEGFA;LDHA;FTH1;PGK1;LCN2;TPT1;TGM2
2378-Tetrachlorodibenzo-P-Dioxin-0.0007 mg/kg in CMC-Rat-Liver-91d-dn	15/311	4.06628e-08	3.1615e-07	0	0	5.91798	100.712	HSPA8;NPM1;RPL10;RPL23;IGFBP3;RPS6;RPS3A;ATP1B1;ICAM1;LDHA;RPS19;PGK1;TXNIP;RPS20;SLC38A2
4-Nonylphenol-200 mg/kg in Corn Oil-Rat-Liver-1d-up	15/311	4.06628e-08	3.15839e-07	0	0	5.91798	100.712	HSPA8;NQO1;TRAM1;RPS6;RPS3A;EEF2;ICAM1;C3;TUBA1B;RPS19;FTH1;CFL1;PGK1;P4HB;CALM2
Betamethasone-79 mg/kg in Corn Oil-Rat-Bone marrow-1d-up	15/311	4.06628e-08	3.15527e-07	0	0	5.91798	100.712	ITGB1;STAT1;RPL23;RPS6;ASNS;RPS3A;YBX1;IFIT2;SLC7A5;LDHA;H1F0;TUBA1B;RPS19;SPP1;TGM2
Famotidine-1200 mg/kg in CMC-Rat-Heart-3d-up	15/311	4.06628e-08	3.15217e-07	0	0	5.91798	100.712	JUN;NPM1;IGFBP3;TPM1;RPS6;RPS3A;CTGF;LDHA;TUBA1B;CFL1;PSMD3;LCN2;TXNIP;P4HB;TGM2
Fluphenazine-22 mg/kg in Corn Oil-Rat-Heart-3d-up	15/311	4.06628e-08	3.14907e-07	0	0	5.91798	100.712	ITGB1;JUN;NPM1;RPL10;RPS6;RPS3A;YBX1;ATP1B1;CTGF;VEGFA;PGK1;TXNIP;SLC38A2;TPT1;TGM2
Mitomycin C-0.5 mg/kg in Saline-Rat-Bone marrow-0.25d-dn	15/311	4.06628e-08	3.14598e-07	0	0	5.91798	100.712	HSPA8;NPM1;RPL10;RPL23;RPS6;RPS3A;LDHA;H1F0;RPS19;FTH1;CFL1;LCN2;RPS20;CALM2;TPT1
Streptomycin-120 mg/kg in Saline-Rat-Kidney-1d-dn	15/311	4.06628e-08	3.14289e-07	0	0	5.91798	100.712	HSPA8;RPL10;RPL23;RPS6;RPS3A;ATP1B1;LDHA;TUBA1B;PSAT1;FASN;PGK1;SPP1;RPS20;CALM2;TPT1
Valproic Acid-235 mg/kg in Water-Rat-Kidney-3d-dn	13/225	4.16467e-08	3.21578e-07	0	0	7.0893	120.476	RPL10;RPL23;VEGFA;H1F0;PSAT1;FTH1;CFL1;PGK1;SPP1;TXNIP;SLC38A2;TPT1;TGM2
Nisoldipine-1125 mg/kg in Water-Rat-Liver-3d-dn	14/267	4.1722e-08	3.21843e-07	0	0	6.43368	109.323	HSPA8;TRAM1;RPL23;RPS6;RPS3A;YBX1;ICAM1;VEGFA;C3;FTH1;PGK1;RPS20;SLC38A2;TPT1
Nortriptyline-70 uM in DMSO-Rat-Primary rat hepatocytes-1d-up	14/267	4.1722e-08	3.21528e-07	0	0	6.43368	109.323	HSPA8;NPM1;RPL23;ASNS;RPS3A;YBX1;EEF2;SLC7A5;LDHA;PSAT1;FASN;LCN2;RPS20;SLC38A2
Fenofibrate-215 mg/kg in Corn Oil-Rat-Kidney-1d-up	16/359	4.22406e-08	3.25207e-07	0	0	5.4685	92.8544	HSPA8;TRAM1;GPX2;NPM1;RPL10;RPL23;RPS6;RPS3A;ATP1B1;EEF2;VEGFA;LDHA;RPS19;PGK1;RPS20;TPT1
Alpha-Naphthoflavone-80 mg/kg in CMC-Rat-Liver-5d-dn	15/312	4.24186e-08	3.26258e-07	0	0	5.89901	100.14	TRAM1;RPL10;RPL23;RPS6;ATP1B1;ICAM1;VEGFA;C3;RPS19;FASN;PGK1;RPS20;P4HB;SLC38A2;TPT1
Bisphenol A-100 mg/kg in Corn Oil-Rat-Bone marrow-0.25d-dn	15/312	4.24186e-08	3.2594e-07	0	0	5.89901	100.14	ITGB1;NPM1;RPL10;RPS3A;NAP1L1;YBX1;LDHA;TUBA1B;CFL1;PSMD3;PGK1;LCN2;VIM;P4HB;CALM2
D-Tubocurarine Chloride-0.033 mg/kg in Saline-Rat-Heart-5d-up	15/312	4.24186e-08	3.25622e-07	0	0	5.89901	100.14	NPM1;RPL23;RPS6;YBX1;CTGF;LDHA;TUBA1B;RPS19;CFL1;PGK1;TXNIP;RPS20;VIM;CALM2;TGM2
Ethosuximide-1200 mg/kg in Water-Rat-Heart-1d-dn	15/312	4.24186e-08	3.25305e-07	0	0	5.89901	100.14	HSPA8;RPL10;RPL23;TPM1;RPS3A;VEGFA;LDHA;TUBA1B;RPS19;PGK1;VIM;SLC38A2;CALM2;TPT1;TGM2
Ketoconazole-90 uM in DMSO-Rat-Primary rat hepatocytes-0.67d-up	15/312	4.24186e-08	3.24989e-07	0	0	5.89901	100.14	NPM1;RPL10;RPL23;RPS6;ASNS;RPS3A;YBX1;SLC7A5;LDHA;RPS19;PSAT1;FTH1;LCN2;RPS20;SLC38A2
Mefenamic Acid-93 mg/kg in Corn Oil-Rat-Kidney-1d-dn	15/312	4.24186e-08	3.24673e-07	0	0	5.89901	100.14	TRAM1;RPL10;RPL23;RPS6;CTGF;LDHA;H1F0;TUBA1B;RPS19;CFL1;PGK1;SPP1;P4HB;CALM2;TGM2
Propylthiouracil-625 mg/kg in CMC-Rat-Liver-5d-dn	15/312	4.24186e-08	3.24358e-07	0	0	5.89901	100.14	HSPA8;JUN;TRAM1;RPL23;IGFBP3;RPS6;RPS3A;ATP1B1;LDHA;H1F0;RPS19;FASN;TXNIP;SLC38A2;TPT1
Acetaminophen-100 mg/kg in Corn Oil-Rat-Kidney-0.25d-dn	14/268	4.37144e-08	3.33942e-07	0	0	6.40967	108.616	ITGB1;RPL10;YBX1;ATP1B1;EEF2;H1F0;RPS19;PSAT1;CFL1;PGK1;SPP1;SLC38A2;TPT1;TGM2
Benzethonium Chloride-138 mg/kg in Water-Rat-Heart-5d-up	15/313	4.4243e-08	3.37653e-07	0	0	5.88016	99.5721	JUN;NPM1;RPL23;TPM1;RPS6;RPS3A;YBX1;CTGF;LDHA;FTH1;CFL1;TXNIP;SLC38A2;TPT1;TGM2
Calcitriol-0.04 mg/kg in CMC-Rat-Kidney-1d-dn	15/313	4.4243e-08	3.37326e-07	0	0	5.88016	99.5721	ITGB1;HSPA8;RPL10;RPL23;CTGF;H1F0;PLAU;FTH1;PGK1;SPP1;TXNIP;P4HB;SLC38A2;CALM2;TPT1
Cobalt (II) Chloride-10 mg/kg in Saline-Rat-Kidney-5d-up	15/313	4.4243e-08	3.37e-07	0	0	5.88016	99.5721	HSPA8;RPL10;RPS6;RPS3A;EEF2;VEGFA;LDHA;H1F0;PLAU;FTH1;SPP1;TXNIP;P4HB;CALM2;TPT1
Cyclosporin A-350 mg/kg in Corn Oil-Rat-Heart-3d-up	15/313	4.4243e-08	3.36674e-07	0	0	5.88016	99.5721	ITGB1;NPM1;RPL10;RPL23;IGFBP3;YBX1;LDHA;H1F0;TXNIP;RPS20;VIM;P4HB;CALM2;TPT1;TGM2
Dichlorvos-17 mg/kg in Water-Rat-Heart-1d-dn	15/313	4.4243e-08	3.36349e-07	0	0	5.88016	99.5721	ITGB1;TRAM1;NPM1;RPL10;TPM1;YBX1;ATP1B1;CTGF;LDHA;TUBA1B;RPS19;FTH1;PGK1;P4HB;SLC38A2
Methocarbamol-1125 mg/kg in CMC-Rat-Liver-3d-up	15/313	4.4243e-08	3.36025e-07	0	0	5.88016	99.5721	HSPA8;JUN;NPM1;RPL10;RPS6;RPS3A;ATP1B1;VEGFA;LDHA;H1F0;RPS19;FTH1;SLC38A2;CALM2;TPT1
Phenacetin-619 mg/kg in Corn Oil-Rat-Liver-1d-dn	15/313	4.4243e-08	3.35701e-07	0	0	5.88016	99.5721	TRAM1;RPL10;RPS6;ICAM1;C3;FADS2;LDHA;H1F0;FTH1;FASN;CFL1;P4HB;TPT1;TGM2;RAI14
Sulindac-23 mg/kg in Corn Oil-Rat-Liver-3d-dn	15/313	4.4243e-08	3.35378e-07	0	0	5.88016	99.5721	TRAM1;NPM1;RPL10;RPL23;RPS6;RPS3A;ATP1B1;ICAM1;VEGFA;LDHA;RPS19;PGK1;RPS20;CALM2;TPT1
Zidovudine-1540 mg/kg in Corn Oil-Rat-Liver-3d-up	15/313	4.4243e-08	3.35056e-07	0	0	5.88016	99.5721	HSPA8;JUN;RPL10;RPS6;RPS3A;ATP1B1;EEF2;VEGFA;TUBA1B;FTH1;CFL1;TXNIP;RPS20;CALM2;TPT1
D-Galactosamine-470 uM in DMSO-Rat-Primary rat hepatocytes-1d-dn	16/361	4.56129e-08	3.45098e-07	0	0	5.4382	91.9223	ITGB1;NQO1;NPM1;RPL10;RPL23;RPS6;YBX1;VEGFA;LDHA;TUBA1B;RPS19;FTH1;CFL1;PGK1;LCN2;P4HB
Indomethacin-9.6 mg/kg in Water-Rat-Liver-3d-up	16/361	4.56129e-08	3.44767e-07	0	0	5.4382	91.9223	TRAM1;RPL10;RPL23;RPS6;RPS3A;EEF2;ICAM1;C3;TUBA1B;RPS19;PLAU;FTH1;LCN2;RPS20;P4HB;TPT1
Sildenafil-14.6 mg/kg in Saline-Rat-Liver-5d-dn	14/269	4.57926e-08	3.45794e-07	0	0	6.38584	107.915	RPL10;RPS6;RPS3A;YBX1;ATP1B1;EEF2;C3;LDHA;H1F0;RPS19;FTH1;PGK1;SLC38A2;TPT1
NN-Dimethylformamide-1400 mg/kg in Saline-Rat-Liver-3d-up	15/314	4.61385e-08	3.48071e-07	0	0	5.86144	99.0091	HSPA8;NPM1;RPS6;RPS3A;TUBA1B;RPS19;PLAU;CFL1;LCN2;SPP1;RPS20;VIM;P4HB;CALM2;TPT1
44'-Methylenedianiline-296 uM in DMSO-Rat-Primary rat hepatocytes-1d-dn	17/412	4.79557e-08	3.61434e-07	0	0	5.06284	85.324	NQO1;TRAM1;NPM1;RPS3A;EEF2;VEGFA;C3;LDHA;TUBA1B;RPS19;FTH1;CFL1;LCN2;P4HB;CALM2;TPT1;TGM2
Fluphenazine-22 mg/kg in Corn Oil-Rat-Liver-1d-dn	14/270	4.79599e-08	3.61121e-07	0	0	6.36219	107.221	NQO1;TRAM1;RPL10;YBX1;ICAM1;C3;LDHA;TUBA1B;FTH1;FASN;CFL1;PGK1;SLC38A2;TPT1
4-Nitrotoluene-750 mg/kg in CMC-Rat-Kidney-1d-dn	15/315	4.81075e-08	3.61886e-07	0	0	5.84283	98.4506	RPL23;IGFBP3;RPS6;NAP1L1;YBX1;ATP1B1;H1F0;PLAU;FTH1;CFL1;SPP1;RPS20;SLC38A2;CALM2;TGM2
Cobalt(II) Acetylacetonate-100 mg/kg in Corn Oil-Rat-Heart-5d-dn	15/315	4.81075e-08	3.61541e-07	0	0	5.84283	98.4506	RPL10;RPL23;TPM1;RPS6;RPS3A;YBX1;EEF2;IFIT2;CTGF;LDHA;TUBA1B;RPS19;PGK1;RPS20;VIM
Itraconazole-30 mg/kg in Corn Oil-Rat-Liver-1d-up	15/315	4.81075e-08	3.61196e-07	0	0	5.84283	98.4506	HSPA8;NPM1;RPL10;STAT1;RPL23;RPS6;RPS3A;TUBA1B;RPS19;PLAU;FASN;RPS20;P4HB;TPT1;RAI14
Rifabutin-1500 mg/kg in CMC-Rat-Kidney-3d-up	15/315	4.81075e-08	3.60852e-07	0	0	5.84283	98.4506	HSPA8;GPX2;RPL10;IGFBP3;RPS6;RPS3A;ATP1B1;VEGFA;TUBA1B;PSAT1;TXNIP;RPS20;VIM;TPT1;TGM2
Etoposide-188 mg/kg in Corn Oil-Rat-Liver-3d-up	16/363	4.92293e-08	3.68915e-07	0	0	5.40824	91.0032	HSPA8;NQO1;TRAM1;RPL10;RPL23;RPS6;ICAM1;C3;FADS2;LDHA;TUBA1B;RPS19;FASN;TXNIP;RPS20;TPT1
Propylene Glycol-2000 mg/kg in Water-Rat-Kidney-5d-dn	12/189	5.00587e-08	3.74774e-07	0	0	7.79044	130.958	HSPA8;RPS19;RPL10;FTH1;RPL23;RPS6;RPS20;RPS3A;YBX1;ATP1B1;EEF2;VEGFA
Amoxapine-313 mg/kg in CMC-Rat-Liver-5d-up	15/316	5.01526e-08	3.75121e-07	0	0	5.82434	97.8966	HSPA8;NQO1;RPL10;RPL23;RPS6;RPS3A;EEF2;ICAM1;VEGFA;C3;RPS19;FASN;PGK1;TPT1;TGM2
Ethylene Glycol-3525 mg/kg in Water-Rat-Liver-5d-dn	15/316	5.01526e-08	3.74765e-07	0	0	5.82434	97.8966	TRAM1;NPM1;RPL10;RPS6;RPS3A;VEGFA;C3;FADS2;LDHA;FTH1;FASN;PGK1;P4HB;TPT1;RAI14
Ketoprofen-4 mg/kg in Corn Oil-Rat-Kidney-5d-up	15/316	5.01526e-08	3.7441e-07	0	0	5.82434	97.8966	GPX2;RPL10;RPL23;RPS6;RPS3A;CTGF;LDHA;RPS19;CFL1;LCN2;SPP1;TXNIP;RPS20;VIM;CALM2
Loperamide-47 mg/kg in CMC-Rat-Intestine-3d-dn	15/316	5.01526e-08	3.74055e-07	0	0	5.82434	97.8966	ITGB1;HSPA8;NPM1;RPL10;RPS3A;YBX1;TUBA1B;RPS19;FTH1;CFL1;PGK1;RPS20;P4HB;CALM2;TPT1
Pralidoxime Chloride-48 mg/kg in Saline-Rat-Heart-3d-up	15/316	5.01526e-08	3.73701e-07	0	0	5.82434	97.8966	ITGB1;JUN;NPM1;RPL10;RPS6;RPS3A;YBX1;EEF2;CTGF;LDHA;TUBA1B;TXNIP;VIM;SLC38A2;TPT1
Sotalol-2000 mg/kg in Water-Rat-Heart-1d-up	15/316	5.01526e-08	3.73348e-07	0	0	5.82434	97.8966	NPM1;ANXA2;RPL10;RPS6;RPS3A;LDHA;H1F0;TUBA1B;RPS19;CFL1;TXNIP;RPS20;VIM;TPT1;TGM2
Modafinil-17.5 mg/kg in Saline-Rat-Liver-0.25d-up	14/271	5.02196e-08	3.73493e-07	0	0	6.33871	106.534	HSPA8;NQO1;RPL10;RPS6;RPS3A;ICAM1;FADS2;LDHA;RPS19;PSAT1;FTH1;PSMD3;PGK1;TPT1
Alfacalcidol-0.043 mg/kg in CMC-Rat-Heart-3d-dn	15/317	5.22765e-08	3.88424e-07	0	0	5.80596	97.347	RPL10;TPM1;RPS6;RPS3A;EEF2;VEGFA;LDHA;TUBA1B;RPS19;PGK1;RPS20;VIM;SLC38A2;CALM2;TPT1
Clofibric Acid-448 mg/kg in Corn Oil-Rat-Liver-3d-up	15/317	5.22765e-08	3.88058e-07	0	0	5.80596	97.347	HSPA8;JUN;NPM1;RPL10;RPS3A;ATP1B1;VEGFA;FADS2;LDHA;RPS19;FASN;CFL1;RPS20;SLC38A2;CALM2
Gabapentin-2500 mg/kg in Water-Rat-Heart-3d-up	15/317	5.22765e-08	3.87692e-07	0	0	5.80596	97.347	HSPA8;NPM1;RPL10;IGFBP3;RPS6;RPS3A;ATP1B1;H1F0;RPS19;FTH1;FASN;PSMD3;SPP1;TXNIP;RPS20
Gold Sodium Thiomalate-8 mg/kg in Saline-Rat-Kidney-5d-up	15/317	5.22765e-08	3.87328e-07	0	0	5.80596	97.347	ITGB1;HSPA8;GPX2;NPM1;RPL10;RPS6;LDHA;PLAU;LCN2;SPP1;TXNIP;RPS20;VIM;P4HB;TPT1
Lidocaine-71 mg/kg in Water-Rat-Heart-1d-up	15/317	5.22765e-08	3.86964e-07	0	0	5.80596	97.347	HSPA8;NPM1;ANXA2;RPL10;RPS6;RPS3A;LDHA;TUBA1B;RPS19;CFL1;TXNIP;VIM;P4HB;CALM2;TPT1
N-Nitrosodiethylamine-34 mg/kg in Saline-Rat-Spleen-1d-up	15/317	5.22765e-08	3.866e-07	0	0	5.80596	97.347	HSPA8;TRAM1;NPM1;RPL10;RPL23;IGFBP3;EEF2;VEGFA;TUBA1B;RPS19;PGK1;TXNIP;RPS20;P4HB;CALM2
Beta-Estradiol 3-Benzoate-25 mg/kg in Corn Oil-Rat-Liver-3d-up	14/272	5.25752e-08	3.88445e-07	0	0	6.31541	105.853	HSPA8;NPM1;RPL10;RPL23;RPS6;RPS3A;ICAM1;VEGFA;RPS19;RPS20;P4HB;SLC38A2;TPT1;TGM2
Sulindac-132 mg/kg in Corn Oil-Rat-Heart-5d-up	14/272	5.25752e-08	3.88081e-07	0	0	6.31541	105.853	HSPA8;NQO1;NPM1;RPL23;RPS6;RPS3A;YBX1;RPS19;LCN2;TXNIP;RPS20;VIM;CALM2;TPT1
Gentamicin-2900 uM in DMSO-Rat-Primary rat hepatocytes-0.67d-dn	16/365	5.31054e-08	3.91628e-07	0	0	5.3786	90.0969	ITGB1;NQO1;TRAM1;GPX2;NPM1;RPL10;RPL23;RPS6;YBX1;ICAM1;C3;TUBA1B;PSAT1;FTH1;P4HB;TPT1
Rosiglitazone-1800 mg/kg in Corn Oil-Rat-Skeletal muscle-5d-up	13/230	5.3934e-08	3.97366e-07	0	0	6.93518	116.064	HSPA8;NQO1;NPM1;RPL10;RPL23;IGFBP3;RPS6;NAP1L1;YBX1;RPS19;PSMD3;TXNIP;RPS20
Ipriflavone-1500 mg/kg in CMC-Rat-Liver-3d-up	15/318	5.44817e-08	4.01026e-07	0	0	5.78771	96.8017	HSPA8;JUN;NPM1;RPL10;RPS3A;FADS2;LDHA;TUBA1B;RPS19;FTH1;CFL1;PGK1;P4HB;SLC38A2;TPT1
Lead (II) Acetate-600 mg/kg in Saline-Rat-Kidney-3d-up	15/318	5.44817e-08	4.00652e-07	0	0	5.78771	96.8017	HSPA8;NQO1;GPX2;NPM1;RPL10;NAP1L1;ATP1B1;LDHA;TUBA1B;RPS19;FTH1;PSMD3;LCN2;SPP1;P4HB
Rofecoxib-775 mg/kg in Corn Oil-Rat-Liver-0.25d-up	15/318	5.44817e-08	4.00278e-07	0	0	5.78771	96.8017	HSPA8;TRAM1;NPM1;IGFBP3;RPS6;ASNS;FADS2;H1F0;RPS19;PLAU;FTH1;TXNIP;P4HB;SLC38A2;CALM2
Sulfathiazole-2629 mg/kg in Water-Rat-Liver-1d-up	15/318	5.44817e-08	3.99905e-07	0	0	5.78771	96.8017	HSPA8;NQO1;NPM1;RPL10;RPL23;RPS3A;YBX1;TUBA1B;FTH1;CFL1;PSMD3;PGK1;RPS20;P4HB;TPT1
Thioacetamide-200 mg/kg in Saline-Rat-Liver-5d-up	15/318	5.44817e-08	3.99533e-07	0	0	5.78771	96.8017	HSPA8;NQO1;NPM1;RPL10;ATP1B1;TUBA1B;RPS19;FTH1;CFL1;PSMD3;PGK1;LCN2;P4HB;SLC38A2;TPT1
Bisphenol A-610 mg/kg in Corn Oil-Rat-Liver-1d-up	14/273	5.50304e-08	4.03181e-07	0	0	6.29228	105.178	HSPA8;NQO1;JUN;TRAM1;RPL23;ATP1B1;ICAM1;LDHA;RPS19;FASN;PSMD3;LCN2;P4HB;TPT1
Ethosuximide-1200 mg/kg in Water-Rat-Heart-3d-dn	15/319	5.67712e-08	4.15548e-07	0	0	5.76956	96.2608	RPL10;RPL23;TPM1;RPS6;RPS3A;ATP1B1;EEF2;LDHA;RPS19;PGK1;RPS20;VIM;SLC38A2;CALM2;TPT1
Finasteride-800 mg/kg in Corn Oil-Rat-Kidney-1d-up	15/319	5.67712e-08	4.15162e-07	0	0	5.76956	96.2608	ITGB1;HSPA8;JUN;NPM1;RPL10;PLOD2;ATP1B1;VEGFA;LDHA;FTH1;SPP1;TXNIP;RPS20;P4HB;SLC38A2
Valproic Acid-850 mg/kg in Water-Rat-Bone marrow-5d-up	15/319	5.67712e-08	4.14777e-07	0	0	5.76956	96.2608	HSPA8;NPM1;RPL10;RPL23;RPS3A;NAP1L1;YBX1;LDHA;TUBA1B;RPS19;FTH1;CFL1;PSMD3;RPS20;TPT1
Fenofibrate-430 mg/kg in Corn Oil-Rat-Skeletal muscle-5d-up	14/274	5.75889e-08	4.20361e-07	0	0	6.26931	104.509	NPM1;RPL10;RPL23;TPM1;RPS6;RPS3A;NAP1L1;RPS19;FASN;PGK1;RPS20;VIM;TPT1;RAI14
Rofecoxib-775 mg/kg in Corn Oil-Rat-Liver-3d-dn	14/274	5.75889e-08	4.19972e-07	0	0	6.26931	104.509	RPL10;RPL23;IGFBP3;RPS6;ATP1B1;EEF2;ICAM1;VEGFA;LDHA;H1F0;RPS19;FASN;PGK1;RAI14
Catechol-195 mg/kg in Saline-Rat-Spleen-1d-up	15/320	5.91478e-08	4.30941e-07	0	0	5.75153	95.7241	NPM1;RPL10;RPS6;YBX1;EEF2;TUBA1B;RPS19;FTH1;CFL1;PGK1;TXNIP;RPS20;VIM;P4HB;CALM2
Clomipramine-115 mg/kg in Water-Rat-Heart-3d-dn	15/320	5.91478e-08	4.30543e-07	0	0	5.75153	95.7241	RPL10;RPL23;TPM1;RPS6;RPS3A;LDHA;TUBA1B;RPS19;CFL1;PGK1;RPS20;VIM;SLC38A2;CALM2;TPT1
Clonazepam-2500 mg/kg in CMC-Rat-Heart-5d-dn	15/320	5.91478e-08	4.30146e-07	0	0	5.75153	95.7241	HSPA8;RPL10;TPM1;RPS6;EEF2;CTGF;LDHA;TUBA1B;FTH1;PGK1;RPS20;VIM;P4HB;CALM2;TGM2
Etoposide-100 mg/kg in Corn Oil-Rat-Bone marrow-1d-up	15/320	5.91478e-08	4.29749e-07	0	0	5.75153	95.7241	HSPA8;TRAM1;NPM1;STAT1;YBX1;IFIT2;LDHA;RPS19;FTH1;PSMD3;PGK1;LCN2;TXNIP;RPS20;VIM
Kanamycin-6584 uM in DMSO-Rat-Primary rat hepatocytes-0.67d-up	15/320	5.91478e-08	4.29353e-07	0	0	5.75153	95.7241	TRAM1;NPM1;RPL10;RPL23;RPS6;RPS3A;YBX1;EEF2;CTGF;TUBA1B;PGK1;RPS20;CALM2;TPT1;TGM2
Cefotaxime-1000 mg/kg in Saline-Rat-Kidney-1d-up	16/368	5.94435e-08	4.31102e-07	0	0	5.33476	88.7609	ITGB1;HSPA8;GPX2;RPL10;RPS6;RPS3A;YBX1;CTGF;TUBA1B;PSAT1;CFL1;PGK1;SPP1;RPS20;CALM2;TPT1
NN-Dimethylformamide-140 mg/kg in Saline-Rat-Bone marrow-1d-up	13/232	5.97007e-08	4.32569e-07	0	0	6.8754	114.365	HSPA8;RPL10;RPS6;RPS3A;LDHA;H1F0;RPS19;CFL1;PGK1;LCN2;TXNIP;RPS20;TPT1
Norethindrone-375 mg/kg in Corn Oil-Rat-Liver-3d-up	14/275	6.02545e-08	4.36181e-07	0	0	6.24651	103.846	ABCC3;HSPA8;NPM1;RPL10;RPL23;RPS6;VEGFA;RPS19;PLAU;PSAT1;FTH1;RPS20;P4HB;RAI14
Eperisone-501 mg/kg in CMC-Rat-Liver-1d-dn	15/321	6.16144e-08	4.45615e-07	0	0	5.73362	95.1916	HSPA8;TRAM1;NPM1;RPL10;RPS6;ATP1B1;ICAM1;VEGFA;C3;LDHA;FASN;PGK1;TXNIP;P4HB;RAI14
Ergocalciferol-15 mg/kg in CMC-Rat-Heart-5d-dn	15/321	6.16144e-08	4.45206e-07	0	0	5.73362	95.1916	HSPA8;RPL10;TPM1;RPS6;RPS3A;ATP1B1;VEGFA;LDHA;TUBA1B;FTH1;PSMD3;RPS20;CALM2;TPT1;TGM2
Meloxicam-0.6 mg/kg in Corn Oil-Rat-Kidney-1d-up	15/321	6.16144e-08	4.44798e-07	0	0	5.73362	95.1916	TRAM1;NPM1;RPS6;LDHA;H1F0;TUBA1B;RPS19;FTH1;CFL1;SPP1;VIM;P4HB;CALM2;TPT1;TGM2
Miconazole-920 mg/kg in Corn Oil-Rat-Liver-1d-dn	15/321	6.16144e-08	4.44391e-07	0	0	5.73362	95.1916	TRAM1;RPL10;IGFBP3;RPS6;YBX1;VEGFA;C3;FADS2;LDHA;FASN;PGK1;P4HB;CALM2;TPT1;TGM2
Valproic Acid-850 mg/kg in Water-Rat-Bone marrow-3d-up	15/321	6.16144e-08	4.43984e-07	0	0	5.73362	95.1916	HSPA8;NPM1;RPL10;RPS6;YBX1;TUBA1B;RPS19;FTH1;CFL1;PSMD3;PGK1;VIM;P4HB;CALM2;RAI14
Streptomycin-120 mg/kg in Saline-Rat-Bone marrow-1d-up	16/369	6.17047e-08	4.44229e-07	0	0	5.3203	88.3218	NPM1;RPL10;RPL23;RPS6;ASNS;RPS3A;YBX1;H1F0;CFL1;LCN2;TXNIP;VIM;P4HB;SLC38A2;CALM2;TPT1
Levosulpiride-1200 mg/kg in CMC-Rat-Heart-1d-dn	13/233	6.27873e-08	4.5161e-07	0	0	6.84589	113.529	HSPA8;NPM1;RPL23;RPS6;RPS3A;EEF2;CTGF;VEGFA;LDHA;RPS19;TXNIP;RPS20;TPT1
Calcitriol-0.04 mg/kg in CMC-Rat-Heart-3d-up	14/276	6.30313e-08	4.52951e-07	0	0	6.22388	103.19	ITGB1;NPM1;STAT1;RPL23;IFIT2;RPS19;CFL1;PSMD3;LCN2;SPP1;TXNIP;P4HB;TGM2;RAI14
Diethylstilbestrol-280 mg/kg in Corn Oil-Rat-Liver-5d-up	14/276	6.30313e-08	4.52538e-07	0	0	6.22388	103.19	ABCC3;HSPA8;NQO1;NPM1;RPL10;RPL23;RPS6;RPS3A;RPS19;RPS20;P4HB;TPT1;TGM2;RAI14
Tamoxifen-64 mg/kg in Corn Oil-Rat-Liver-3d-dn	14/276	6.30313e-08	4.52126e-07	0	0	6.22388	103.19	RPL10;RPS3A;YBX1;EEF2;C3;FADS2;LDHA;FTH1;FASN;CFL1;PGK1;P4HB;CALM2;TPT1
D-Tubocurarine Chloride-0.033 mg/kg in Saline-Rat-Heart-3d-up	16/370	6.40442e-08	4.58974e-07	0	0	5.30592	87.8856	RPL10;RPL23;RPS6;PLOD2;RPS3A;ATP1B1;CTGF;LDHA;TUBA1B;RPS19;CFL1;TXNIP;RPS20;VIM;CALM2;TPT1
Amiloride-22 mg/kg in CMC-Rat-Heart-5d-dn	15/322	6.41741e-08	4.59486e-07	0	0	5.71581	94.6633	JUN;ANXA2;RPL10;EEF2;CTGF;LDHA;H1F0;TUBA1B;RPS19;CFL1;PSMD3;PGK1;TXNIP;RPS20;VIM
Diclofenac-10 mg/kg in Corn Oil-Rat-Kidney-5d-up	15/322	6.41741e-08	4.59069e-07	0	0	5.71581	94.6633	HSPA8;NPM1;RPL23;IGFBP3;RPS6;RPS3A;LDHA;TUBA1B;RPS19;LCN2;SPP1;TXNIP;RPS20;TPT1;TGM2
Promazine-100 mg/kg in Corn Oil-Rat-Liver-3d-dn	15/322	6.41741e-08	4.58652e-07	0	0	5.71581	94.6633	TRAM1;NPM1;RPL23;IGFBP3;RPS6;RPS3A;FADS2;LDHA;TUBA1B;RPS19;FTH1;FASN;PGK1;P4HB;TPT1
Sparfloxacin-450 mg/kg in Corn Oil-Rat-Liver-1d-up	15/322	6.41741e-08	4.58236e-07	0	0	5.71581	94.6633	HSPA8;TRAM1;NPM1;RPL10;RPS6;RPS3A;ICAM1;FADS2;TUBA1B;RPS19;PLAU;FTH1;RPS20;P4HB;TPT1
Sparteine-33 mg/kg in Water-Rat-Heart-1d-up	15/322	6.41741e-08	4.57821e-07	0	0	5.71581	94.6633	HSPA8;NPM1;ANXA2;TPM1;RPS6;RPS3A;YBX1;EEF2;CTGF;LDHA;CFL1;RPS20;VIM;CALM2;TPT1
Acyclovir-330 mg/kg in Saline-Rat-Spleen-3d-dn	14/277	6.59233e-08	4.69875e-07	0	0	6.20141	102.539	NPM1;RPL10;IGFBP3;YBX1;EEF2;VEGFA;LDHA;CFL1;PGK1;TXNIP;VIM;SLC38A2;CALM2;TPT1
Chlormadinone Acetate-2000 mg/kg in CMC-Rat-Kidney-5d-dn	14/277	6.59233e-08	4.6945e-07	0	0	6.20141	102.539	RPL10;RPS6;RPS3A;EEF2;CTGF;LDHA;H1F0;TUBA1B;PLAU;PSAT1;FTH1;PGK1;SPP1;TPT1
Diphenidol-300 mg/kg in Water-Rat-Heart-5d-up	14/277	6.59233e-08	4.69026e-07	0	0	6.20141	102.539	HSPA8;JUN;NPM1;ANXA2;RPL10;RPS6;RPS3A;ATP1B1;RPS19;FTH1;TXNIP;VIM;CALM2;TGM2
L-Phenylephrine-0.44 mg/kg in Saline-Rat-Heart-3d-dn	14/277	6.59233e-08	4.68603e-07	0	0	6.20141	102.539	HSPA8;TPM1;RPS6;RPS3A;YBX1;EEF2;VEGFA;TUBA1B;FTH1;CFL1;TXNIP;VIM;SLC38A2;TPT1
Thiamphenicol-1500 mg/kg in Water-Rat-Kidney-3d-dn	13/234	6.60168e-08	4.68844e-07	0	0	6.81663	112.702	ITGB1;TRAM1;NPM1;RPL10;YBX1;TUBA1B;FTH1;CFL1;PGK1;SPP1;SLC38A2;CALM2;TPT1
Amiodarone-147 mg/kg in CMC-Rat-Heart-5d-dn	15/323	6.683e-08	4.74192e-07	0	0	5.69811	94.1392	HSPA8;JUN;ANXA2;RPL10;RPS6;RPS3A;CTGF;LDHA;TUBA1B;CFL1;VIM;P4HB;CALM2;TPT1;TGM2
Dideoxycytidine-1200 mg/kg in CMC-Rat-Liver-3d-dn	15/323	6.683e-08	4.73765e-07	0	0	5.69811	94.1392	NQO1;RPL10;RPL23;IGFBP3;RPS6;YBX1;EEF2;ICAM1;LDHA;RPS19;FTH1;FASN;PGK1;RPS20;P4HB
Proglumide-1125 mg/kg in CMC-Rat-Liver-3d-dn	15/323	6.683e-08	4.73339e-07	0	0	5.69811	94.1392	HSPA8;NQO1;TRAM1;RPL10;RPL23;ICAM1;VEGFA;C3;LDHA;RPS19;FTH1;FASN;PGK1;RPS20;CALM2
Ticlopidine-223 mg/kg in CMC-Rat-Liver-1d-up	15/323	6.683e-08	4.72914e-07	0	0	5.69811	94.1392	NQO1;RPL23;RPS6;RPS3A;EEF2;LDHA;TUBA1B;RPS19;FTH1;CFL1;PSMD3;PGK1;RPS20;CALM2;TPT1
Trichloroacetic Acid-474 mg/kg in Corn Oil-Rat-Liver-5d-up	15/323	6.683e-08	4.72489e-07	0	0	5.69811	94.1392	HSPA8;NQO1;ATP1B1;EEF2;C3;LDHA;H1F0;RPS19;FASN;CFL1;LCN2;RPS20;P4HB;TPT1;TGM2
Vecuronium Bromide-0.05 mg/kg in Saline-Rat-Heart-5d-up	15/323	6.683e-08	4.72065e-07	0	0	5.69811	94.1392	NPM1;RPL10;STAT1;RPL23;IGFBP3;RPS6;ATP1B1;LDHA;RPS19;FTH1;TXNIP;RPS20;CALM2;TGM2;RAI14
Pyridine-223 mg/kg in Water-Rat-Kidney-1d-up	16/372	6.89673e-08	4.86726e-07	0	0	5.27739	87.0223	ITGB1;JUN;NPM1;RPL10;ATP1B1;CTGF;LDHA;H1F0;PSAT1;PSMD3;PGK1;SPP1;TXNIP;SLC38A2;TPT1;TGM2
(R)-Bicalutamide-1400 mg/kg in CMC-Rat-Kidney-1d-up	15/324	6.95853e-08	4.90648e-07	0	0	5.68053	93.6191	HSPA8;NPM1;RPL10;RPL23;RPS6;YBX1;TUBA1B;RPS19;FTH1;CFL1;SPP1;P4HB;CALM2;TPT1;TGM2
Allyl Alcohol-32 mg/kg in Saline-Rat-Liver-5d-up	15/324	6.95853e-08	4.90209e-07	0	0	5.68053	93.6191	RPL10;RPL23;RPS3A;FADS2;RPS19;PSAT1;FTH1;CFL1;LCN2;SPP1;VIM;P4HB;CALM2;TPT1;TGM2
Pyrilamine-688 mg/kg in Water-Rat-Heart-1d-up	15/324	6.95853e-08	4.89771e-07	0	0	5.68053	93.6191	HSPA8;NPM1;ANXA2;RPL10;RPL23;RPS6;RPS3A;LDHA;RPS19;TXNIP;RPS20;VIM;CALM2;TPT1;TGM2
Tamoxifen-37.5 uM in DMSO-Rat-Primary rat hepatocytes-1d-dn	15/324	6.95853e-08	4.89334e-07	0	0	5.68053	93.6191	ITGB1;HSPA8;JUN;TRAM1;RPL10;CTGF;C3;LDHA;TUBA1B;PGK1;RPS20;P4HB;CALM2;TPT1;TGM2
Tetracaine-24 mg/kg in Corn Oil-Rat-Heart-3d-up	15/324	6.95853e-08	4.88898e-07	0	0	5.68053	93.6191	RPL10;TPM1;RPS6;RPS3A;YBX1;EEF2;LDHA;TUBA1B;RPS19;CFL1;RPS20;VIM;TPT1;TGM2;RAI14
6-Methoxy-2-Naphthylacetic Acid-360 mg/kg in Saline-Rat-Kidney-0.25d-up	14/279	7.20701e-08	5.05904e-07	0	0	6.15696	101.255	ITGB1;NPM1;RPL23;RPS3A;YBX1;ATP1B1;VEGFA;RPS19;PSAT1;FTH1;CFL1;PGK1;SPP1;RPS20
Clarithromycin-56 mg/kg in Water-Rat-Liver-5d-dn	14/279	7.20701e-08	5.05453e-07	0	0	6.15696	101.255	NQO1;NPM1;RPL10;RPL23;ATP1B1;EEF2;C3;FADS2;LDHA;FASN;PGK1;P4HB;TPT1;RAI14
Doxorubicin-3 mg/kg in Saline-Rat-Kidney-3d-dn	14/279	7.20701e-08	5.05004e-07	0	0	6.15696	101.255	JUN;NPM1;IGFBP3;VEGFA;H1F0;RPS19;PSAT1;CFL1;TXNIP;RPS20;SLC38A2;CALM2;TPT1;TGM2
Procaine-2500 mg/kg in Water-Rat-Heart-5d-up	14/279	7.20701e-08	5.04555e-07	0	0	6.15696	101.255	HSPA8;NPM1;RPL10;EEF2;CTGF;LDHA;H1F0;RPS19;FTH1;FASN;TXNIP;VIM;CALM2;TPT1
Sulindac-132 mg/kg in Corn Oil-Rat-Liver-5d-up	14/279	7.20701e-08	5.04107e-07	0	0	6.15696	101.255	HSPA8;NQO1;TRAM1;RPL23;RPS6;RPS3A;NAP1L1;C3;RPS19;LCN2;RPS20;P4HB;SLC38A2;RAI14
Cadmium Acetate-167 mg/kg in Water-Rat-Kidney-3d-up	15/325	7.24435e-08	5.06269e-07	0	0	5.66305	93.1031	HSPA8;JUN;IGFBP3;RPS6;RPS3A;ATP1B1;CTGF;LDHA;H1F0;RPS19;TXNIP;RPS20;VIM;CALM2;TPT1
Cerivastatin-7 mg/kg in Corn Oil-Rat-Skeletal muscle-3d-dn	15/325	7.24435e-08	5.0582e-07	0	0	5.66305	93.1031	RPL10;RPL23;TPM1;RPS6;RPS3A;ATP1B1;EEF2;LDHA;TUBA1B;RPS19;CFL1;PGK1;RPS20;VIM;CALM2
Cinnarizine-750 mg/kg in CMC-Rat-Liver-5d-dn	15/325	7.24435e-08	5.05372e-07	0	0	5.66305	93.1031	HSPA8;NPM1;RPL23;IGFBP3;RPS6;EEF2;VEGFA;C3;FADS2;LDHA;H1F0;RPS19;FTH1;FASN;TXNIP
Lomustine-8.75 mg/kg in Corn Oil-Rat-Spleen-1d-dn	15/325	7.24435e-08	5.04925e-07	0	0	5.66305	93.1031	HSPA8;TRAM1;NPM1;RPL10;IGFBP3;RPS3A;NAP1L1;YBX1;EEF2;LDHA;RPS19;FTH1;CFL1;CALM2;TPT1
Methotrexate-27 mg/kg in Corn Oil-Rat-Liver-1d-dn	15/325	7.24435e-08	5.04478e-07	0	0	5.66305	93.1031	NQO1;TRAM1;NPM1;RPL10;RPL23;RPS6;RPS3A;FADS2;LDHA;H1F0;FASN;PGK1;TXNIP;P4HB;TPT1
Norethindrone Acetate-125 mg/kg in Corn Oil-Rat-Liver-5d-up	15/325	7.24435e-08	5.04033e-07	0	0	5.66305	93.1031	HSPA8;JUN;RPL10;RPL23;RPS6;RPS3A;EEF2;VEGFA;LDHA;RPS19;TXNIP;RPS20;SLC38A2;TPT1;TGM2
Norfloxacin-1500 mg/kg in CMC-Rat-Kidney-5d-up	15/325	7.24435e-08	5.03588e-07	0	0	5.66305	93.1031	HSPA8;NPM1;RPL10;ATP1B1;TUBA1B;PSAT1;FTH1;CFL1;LCN2;SPP1;TXNIP;P4HB;SLC38A2;TPT1;TGM2
Pantoprazole-1100 mg/kg in Water-Rat-Liver-3d-up	15/325	7.24435e-08	5.03144e-07	0	0	5.66305	93.1031	ABCC3;NQO1;GPX2;NPM1;RPS6;RPS3A;YBX1;ATP1B1;EEF2;ICAM1;TUBA1B;RPS19;PSAT1;CFL1;PGK1
Tacrine-24 mg/kg in Water-Rat-Liver-5d-dn	15/325	7.24435e-08	5.027e-07	0	0	5.66305	93.1031	HSPA8;TRAM1;RPL23;IGFBP3;RPS3A;ICAM1;LDHA;TUBA1B;RPS19;FASN;PGK1;P4HB;TPT1;TGM2;RAI14
Ofloxacin-3000 mg/kg in Water-Rat-Kidney-5d-dn	13/236	7.29279e-08	5.05616e-07	0	0	6.75886	111.074	HSPA8;JUN;RPL10;RPL23;RPS6;RPS3A;EEF2;VEGFA;H1F0;TUBA1B;RPS19;RPS20;VIM
Benzothiazyl Disulfide-2600 mg/kg in Corn Oil-Rat-Kidney-5d-dn	14/280	7.53338e-08	5.21838e-07	0	0	6.13497	100.622	HSPA8;JUN;RPL10;RPL23;RPS6;RPS3A;YBX1;ATP1B1;FTH1;CFL1;SPP1;TXNIP;RPS20;CALM2
Carmustine-4 mg/kg in Corn Oil-Rat-Liver-3d-dn	14/280	7.53338e-08	5.21379e-07	0	0	6.13497	100.622	HSPA8;JUN;ICAM1;VEGFA;C3;FADS2;LDHA;RPS19;FASN;PGK1;P4HB;TPT1;TGM2;RAI14
Ceramide C2-44 uM in DMSO-Rat-Primary rat hepatocytes-1d-up	14/280	7.53338e-08	5.20921e-07	0	0	6.13497	100.622	HSPA8;JUN;GPX2;ANXA2;RPL23;ASNS;LDHA;TUBA1B;PSMD3;PGK1;LCN2;RPS20;P4HB;SLC38A2
Norethindrone-125 uM in DMSO-Rat-Primary rat hepatocytes-1d-dn	14/280	7.53338e-08	5.20464e-07	0	0	6.13497	100.622	ITGB1;JUN;TRAM1;GPX2;CTGF;LDHA;TUBA1B;RPS19;CFL1;LCN2;RPS20;CALM2;TPT1;TGM2
Piroxicam-14 mg/kg in CMC-Rat-Kidney-3d-dn	14/280	7.53338e-08	5.20008e-07	0	0	6.13497	100.622	TRAM1;RPL23;IGFBP3;RPS6;YBX1;CTGF;RPS19;PLAU;PSAT1;CFL1;PGK1;TXNIP;TPT1;TGM2
Rofecoxib-3 mg/kg in Corn Oil-Rat-Liver-0.25d-dn	14/280	7.53338e-08	5.19553e-07	0	0	6.13497	100.622	RPL10;RPL23;RPS3A;YBX1;ICAM1;VEGFA;C3;LDHA;TUBA1B;FTH1;RPS20;TPT1;TGM2;RAI14
Rolipram-75 mg/kg in CMC-Rat-Heart-3d-dn	14/280	7.53338e-08	5.19098e-07	0	0	6.13497	100.622	RPL10;IGFBP3;TPM1;RPS6;EEF2;VEGFA;LDHA;TUBA1B;FTH1;PGK1;VIM;SLC38A2;CALM2;TGM2
Benzyl Acetate-1868 mg/kg in CMC-Rat-Kidney-5d-up	15/326	7.54078e-08	5.19154e-07	0	0	5.64568	92.5911	HSPA8;GPX2;NPM1;RPL10;RPL23;RPS3A;CTGF;LDHA;RPS19;FTH1;LCN2;SPP1;RPS20;TPT1;RAI14
Fluocinolone Acetonide-2.5 mg/kg in Corn Oil-Rat-Kidney-3d-up	15/326	7.54078e-08	5.187e-07	0	0	5.64568	92.5911	GPX2;RPL10;RPL23;IGFBP3;RPS3A;ATP1B1;VEGFA;LDHA;H1F0;PSAT1;PGK1;SPP1;RPS20;ITGAV;TPT1
Lead(IV) Acetate-200 mg/kg in Saline-Rat-Liver-3d-dn	15/326	7.54078e-08	5.18248e-07	0	0	5.64568	92.5911	TRAM1;EEF2;VEGFA;C3;LDHA;RPS19;PLAU;FTH1;FASN;PGK1;LCN2;TXNIP;P4HB;TGM2;RAI14
Methotrexate-0.3 mg/kg in Corn Oil-Rat-Kidney-0.25d-up	15/326	7.54078e-08	5.17796e-07	0	0	5.64568	92.5911	HSPA8;NPM1;RPL23;IGFBP3;RPS6;PLOD2;RPS3A;ATP1B1;CTGF;TUBA1B;RPS19;FTH1;FASN;TXNIP;RPS20
Phenylbutazone-368 mg/kg in CMC-Rat-Kidney-5d-up	15/326	7.54078e-08	5.17345e-07	0	0	5.64568	92.5911	HSPA8;NPM1;RPL10;RPL23;IGFBP3;RPS6;ATP1B1;CTGF;FTH1;CFL1;PGK1;TXNIP;P4HB;SLC38A2;TPT1
Chlorpyrifos-82 mg/kg in CMC-Rat-Kidney-3d-dn	15/327	7.84819e-08	5.37966e-07	0	0	5.62841	92.0831	JUN;NPM1;RPL10;RPL23;IGFBP3;RPS6;YBX1;ATP1B1;CTGF;H1F0;RPS19;PGK1;SPP1;RPS20;TGM2
Meloxicam-33 mg/kg in Corn Oil-Rat-Liver-3d-up	15/327	7.84819e-08	5.37499e-07	0	0	5.62841	92.0831	TRAM1;NPM1;STAT1;RPL23;RPS3A;ATP1B1;TUBA1B;RPS19;FTH1;FASN;LCN2;TXNIP;RPS20;P4HB;SLC38A2
Catechol-195 mg/kg in Saline-Rat-Kidney-5d-dn	14/281	7.87306e-08	5.38734e-07	0	0	6.11314	99.994	NPM1;RPL10;RPL23;IGFBP3;ATP1B1;EEF2;CTGF;PLAU;PSAT1;FTH1;CFL1;SPP1;TXNIP;CALM2
Cholecalciferol-8 mg/kg in CMC-Rat-Heart-1d-dn	14/281	7.87306e-08	5.38266e-07	0	0	6.11314	99.994	HSPA8;RPL23;TPM1;RPS6;RPS3A;EEF2;CTGF;LDHA;TUBA1B;VIM;SLC38A2;CALM2;TPT1;TGM2
Progesterone-164 mg/kg in Corn Oil-Rat-Liver-1d-up	14/281	7.87306e-08	5.37799e-07	0	0	6.11314	99.994	HSPA8;NQO1;TRAM1;NPM1;RPS6;RPS3A;RPS19;PSAT1;FTH1;PSMD3;PGK1;RPS20;CALM2;TPT1
Acetazolamide-47 mg/kg in Corn Oil-Rat-Liver-3d-up	15/328	8.16693e-08	5.57389e-07	0	0	5.61125	91.5789	TRAM1;NPM1;RPL23;IGFBP3;RPS3A;YBX1;TUBA1B;RPS19;PLAU;FTH1;CFL1;PGK1;RPS20;P4HB;CALM2
Fluvastatin-5 mg/kg in Corn Oil-Rat-Kidney-0.25d-dn	15/328	8.16693e-08	5.56907e-07	0	0	5.61125	91.5789	ITGB1;PLOD2;RPS3A;YBX1;ATP1B1;VEGFA;PSAT1;FTH1;CFL1;SPP1;RPS20;SLC38A2;CALM2;TPT1;TGM2
Omeprazole-415 mg/kg in Corn Oil-Rat-Liver-1d-up	15/328	8.16693e-08	5.56425e-07	0	0	5.61125	91.5789	NQO1;NPM1;RPL23;ASNS;RPS3A;EEF2;ICAM1;LDHA;RPS19;PLAU;PSAT1;PSMD3;RPS20;P4HB;TPT1
Vinorelbine-1.5 mg/kg in Saline-Rat-Bone marrow-1d-dn	15/328	8.16693e-08	5.55944e-07	0	0	5.61125	91.5789	NPM1;RPL10;RPL23;RPS6;ASNS;RPS3A;TUBA1B;RPS19;FTH1;PGK1;LCN2;RPS20;VIM;CALM2;TPT1
Colistin-121 mg/kg in Water-Rat-Liver-1d-dn	14/282	8.22653e-08	5.59518e-07	0	0	6.09146	99.3719	HSPA8;TRAM1;NPM1;RPL23;C3;FADS2;RPS19;PLAU;FASN;RPS20;P4HB;SLC38A2;TPT1;RAI14
DActinomycin-0.06 mg/kg in Saline-Rat-Bone marrow-3d-up	14/282	8.22653e-08	5.59035e-07	0	0	6.09146	99.3719	HSPA8;NPM1;ANXA2;RPL10;RPL23;RPS3A;NAP1L1;YBX1;C3;LDHA;RPS19;FTH1;VIM;P4HB
Ethanol-6000 mg/kg in Saline-Rat-Kidney-3d-dn	14/282	8.22653e-08	5.58553e-07	0	0	6.09146	99.3719	JUN;NPM1;RPL10;RPS6;EEF2;TUBA1B;PLAU;PSAT1;CFL1;PGK1;SPP1;SLC38A2;TPT1;TGM2
Itraconazole-1093 mg/kg in Corn Oil-Rat-Liver-5d-dn	14/282	8.22653e-08	5.58072e-07	0	0	6.09146	99.3719	JUN;IGFBP3;RPS3A;ATP1B1;EEF2;ICAM1;C3;FADS2;LDHA;H1F0;TUBA1B;FASN;PGK1;TPT1
Meropenem-1500 mg/kg in CMC-Rat-Spleen-5d-up	14/282	8.22653e-08	5.57592e-07	0	0	6.09146	99.3719	HSPA8;TRAM1;NPM1;RPL10;RPL23;RPS6;YBX1;VEGFA;RPS19;FTH1;PGK1;TXNIP;RPS20;CALM2
Pentoxifylline-1170 mg/kg in CMC-Rat-Heart-5d-up	14/282	8.22653e-08	5.57112e-07	0	0	6.09146	99.3719	ITGB1;JUN;NPM1;TPM1;YBX1;CTGF;VEGFA;FTH1;PGK1;TXNIP;RPS20;SLC38A2;CALM2;TPT1
SCH-351591-4.6 mg/kg in CMC-Rat-Heart-1d-dn	14/282	8.22653e-08	5.56633e-07	0	0	6.09146	99.3719	HSPA8;NPM1;RPL23;IGFBP3;RPS6;YBX1;ATP1B1;EEF2;CTGF;LDHA;RPS19;TXNIP;RPS20;TPT1
Valsartan-1000 mg/kg in Corn Oil-Rat-Kidney-3d-up	14/282	8.22653e-08	5.56156e-07	0	0	6.09146	99.3719	HSPA8;JUN;NPM1;RPS3A;ATP1B1;EEF2;CTGF;VEGFA;LDHA;SPP1;TXNIP;RPS20;SLC38A2;TPT1
Danazol-95 uM in DMSO-Rat-Primary rat hepatocytes-1d-up	16/377	8.2821e-08	5.59433e-07	0	0	5.2074	84.9149	GPX2;NPM1;RPL10;RPS3A;NAP1L1;YBX1;CTGF;LDHA;TUBA1B;RPS19;CFL1;PGK1;SLC38A2;CALM2;TPT1;RAI14
Famciclovir-1200 mg/kg in Saline-Rat-Liver-3d-dn	16/377	8.2821e-08	5.58953e-07	0	0	5.2074	84.9149	HSPA8;NPM1;RPL10;RPS3A;YBX1;EEF2;VEGFA;C3;LDHA;H1F0;FTH1;FASN;TXNIP;P4HB;CALM2;TPT1
Loratadine-62.25 uM in DMSO-Rat-Primary rat hepatocytes-1d-up	16/377	8.2821e-08	5.58475e-07	0	0	5.2074	84.9149	GPX2;NPM1;RPL10;RPS6;RPS3A;CTGF;LDHA;TUBA1B;RPS19;PSAT1;FASN;PGK1;P4HB;CALM2;TPT1;TGM2
Lomustine-8.75 mg/kg in Corn Oil-Rat-Liver-5d-up	15/329	8.49738e-08	5.72501e-07	0	0	5.5942	91.0787	TRAM1;NPM1;RPL10;RPL23;ASNS;RPS3A;RPS19;PLAU;FTH1;CFL1;LCN2;RPS20;P4HB;CALM2;TPT1
Alfacalcidol-0.043 mg/kg in CMC-Rat-Heart-3d-up	14/283	8.59428e-08	5.78534e-07	0	0	6.06993	98.7553	HSPA8;NPM1;STAT1;RPL23;YBX1;ATP1B1;IFIT2;FTH1;CFL1;LCN2;TXNIP;P4HB;TGM2;RAI14
Fluorouracil-29 mg/kg in CMC-Rat-Spleen-5d-up	14/283	8.59428e-08	5.7804e-07	0	0	6.06993	98.7553	HSPA8;TRAM1;NPM1;RPL10;RPL23;IGFBP3;RPS6;VEGFA;RPS19;FTH1;CFL1;PGK1;TXNIP;RPS20
Nifedipine-1022 mg/kg in CMC-Rat-Heart-3d-up	14/283	8.59428e-08	5.77547e-07	0	0	6.06993	98.7553	ITGB1;JUN;NPM1;RPL10;RPS3A;CTGF;VEGFA;RPS19;FTH1;CFL1;TXNIP;RPS20;P4HB;TGM2
Norfloxacin-1500 mg/kg in CMC-Rat-Kidney-1d-dn	14/283	8.59428e-08	5.77055e-07	0	0	6.06993	98.7553	ITGB1;JUN;NPM1;RPL23;RPS3A;YBX1;EEF2;VEGFA;H1F0;PLAU;PSAT1;FTH1;PGK1;SPP1
Streptozotocin-138 mg/kg in Saline-Rat-Liver-1d-dn	14/283	8.59428e-08	5.76563e-07	0	0	6.06993	98.7553	TRAM1;NPM1;RPL23;RPS6;RPS3A;C3;LDHA;RPS19;FASN;CFL1;TXNIP;P4HB;CALM2;TPT1
Thiabendazole-10 mg/kg in Corn Oil-Rat-Liver-1d-up	14/283	8.59428e-08	5.76072e-07	0	0	6.06993	98.7553	HSPA8;TRAM1;NPM1;RPL23;RPS6;ASNS;RPS3A;EEF2;FADS2;RPS19;PSAT1;TXNIP;RPS20;P4HB
Carboplatin-6 mg/kg in Saline-Rat-Liver-1d-dn	15/330	8.83991e-08	5.92034e-07	0	0	5.57724	90.5823	HSPA8;TRAM1;NPM1;RPL10;RPL23;RPS6;RPS3A;YBX1;EEF2;C3;FADS2;RPS19;TXNIP;P4HB;CALM2
Chlorpropamide-269 mg/kg in CMC-Rat-Heart-3d-dn	15/330	8.83991e-08	5.91531e-07	0	0	5.57724	90.5823	RPL10;ATP1B1;EEF2;CTGF;VEGFA;LDHA;TUBA1B;RPS19;CFL1;PGK1;TXNIP;RPS20;VIM;SLC38A2;CALM2
Etoposide-100 mg/kg in Corn Oil-Rat-Liver-1d-up	15/330	8.83991e-08	5.91028e-07	0	0	5.57724	90.5823	HSPA8;TRAM1;STAT1;RPL23;IFIT2;VEGFA;C3;FADS2;H1F0;TUBA1B;RPS19;PSAT1;FTH1;TXNIP;RAI14
Hydroquinone-800 mg/kg in CMC-Rat-Kidney-1d-dn	15/330	8.83991e-08	5.90527e-07	0	0	5.57724	90.5823	HSPA8;NPM1;RPL10;RPS6;CTGF;H1F0;RPS19;PLAU;PSAT1;PGK1;SPP1;TXNIP;RPS20;CALM2;TGM2
Lead(IV) Acetate-200 mg/kg in Saline-Rat-Kidney-1d-up	15/330	8.83991e-08	5.90027e-07	0	0	5.57724	90.5823	NQO1;GPX2;NPM1;RPL23;RPS6;NAP1L1;LDHA;TUBA1B;RPS19;FTH1;PGK1;SPP1;RPS20;P4HB;CALM2
Procarbazine-54 mg/kg in Water-Rat-Liver-3d-dn	15/330	8.83991e-08	5.89527e-07	0	0	5.57724	90.5823	RPL23;RPS3A;EEF2;VEGFA;C3;LDHA;FTH1;FASN;CFL1;PGK1;RPS20;P4HB;CALM2;TPT1;TGM2
Piclamilast-17 mg/kg in CMC-Rat-Liver-5d-up	14/284	8.97682e-08	5.98151e-07	0	0	6.04856	98.1442	ITGB1;HSPA8;NPM1;RPS3A;ATP1B1;C3;FADS2;H1F0;FTH1;FASN;LCN2;SLC38A2;CALM2;TPT1
Simvastatin-15 mg/kg in Corn Oil-Rat-Liver-1d-dn	14/284	8.97682e-08	5.97645e-07	0	0	6.04856	98.1442	TRAM1;RPL23;ICAM1;VEGFA;C3;FADS2;LDHA;H1F0;RPS19;FASN;CFL1;PGK1;P4HB;CALM2
Torsemide-110 mg/kg in Corn Oil-Rat-Liver-1d-dn	14/284	8.97682e-08	5.9714e-07	0	0	6.04856	98.1442	RPL10;RPS6;RPS3A;YBX1;C3;FADS2;LDHA;RPS19;FTH1;FASN;RPS20;P4HB;SLC38A2;CALM2
Coumarin-111 mg/kg in Corn Oil-Rat-Bone marrow-0.25d-dn	15/331	9.19493e-08	6.11133e-07	0	0	5.5604	90.0897	NPM1;RPL10;RPL23;RPS6;YBX1;LDHA;TUBA1B;RPS19;CFL1;PGK1;RPS20;VIM;P4HB;SLC38A2;CALM2
Epirubicin-2.7 mg/kg in Saline-Rat-Heart-3d-up	15/331	9.19493e-08	6.10618e-07	0	0	5.5604	90.0897	HSPA8;NPM1;ANXA2;RPL10;RPL23;RPS6;YBX1;ATP1B1;CTGF;LDHA;RPS19;TXNIP;RPS20;TPT1;TGM2
Atropine-2.3 mg/kg in Water-Rat-Liver-0.25d-dn	14/285	9.37468e-08	6.2203e-07	0	0	6.02734	97.5384	TRAM1;RPL10;RPS6;YBX1;ICAM1;VEGFA;C3;FADS2;LDHA;RPS19;FASN;PGK1;P4HB;RAI14
Ranitidine-1500 mg/kg in CMC-Rat-Heart-1d-dn	14/285	9.37468e-08	6.21506e-07	0	0	6.02734	97.5384	NPM1;RPL10;RPL23;IGFBP3;TPM1;RPS3A;YBX1;CTGF;RPS19;PGK1;TXNIP;CALM2;TPT1;TGM2
Thioguanine-12 mg/kg in Corn Oil-Rat-Bone marrow-0.25d-dn	14/285	9.37468e-08	6.20984e-07	0	0	6.02734	97.5384	NPM1;RPL10;RPL23;RPS6;RPS3A;LDHA;RPS19;CFL1;PGK1;LCN2;P4HB;SLC38A2;CALM2;TPT1
Foscarnet-350 mg/kg in Saline-Rat-Bone marrow-1d-up	15/332	9.56284e-08	6.32916e-07	0	0	5.54365	89.6008	TRAM1;NPM1;RPL10;ASNS;RPS3A;NAP1L1;YBX1;LDHA;H1F0;PGK1;TXNIP;VIM;P4HB;CALM2;TPT1
Hydroxyurea-59 mg/kg in Saline-Rat-Spleen-1d-dn	15/332	9.56284e-08	6.32384e-07	0	0	5.54365	89.6008	HSPA8;NPM1;RPL10;RPL23;RPS6;RPS3A;LDHA;H1F0;TUBA1B;FTH1;CFL1;PGK1;TXNIP;RPS20;TPT1
Loperamide-47 mg/kg in CMC-Rat-Intestine-1d-dn	15/332	9.56284e-08	6.31854e-07	0	0	5.54365	89.6008	HSPA8;GPX2;RPL10;RPL23;IGFBP3;RPS3A;ATP1B1;RPS19;PSMD3;TXNIP;RPS20;VIM;P4HB;SLC38A2;CALM2
Pantoprazole-1100 mg/kg in Water-Rat-Liver-5d-up	15/332	9.56284e-08	6.31324e-07	0	0	5.54365	89.6008	ABCC3;NQO1;GPX2;RPL10;RPS6;RPS3A;YBX1;ATP1B1;ICAM1;C3;FADS2;FTH1;FASN;P4HB;SLC38A2
Tamoxifen-64 mg/kg in Corn Oil-Rat-Heart-5d-dn	15/332	9.56284e-08	6.30795e-07	0	0	5.54365	89.6008	HSPA8;RPL10;RPL23;TPM1;RPS6;YBX1;EEF2;LDHA;RPS19;PGK1;RPS20;VIM;SLC38A2;CALM2;TGM2
Clotrimazole-60 uM in DMSO-Rat-Primary rat hepatocytes-0.67d-dn	16/381	9.56796e-08	6.30605e-07	0	0	5.15273	83.2798	HSPA8;TRAM1;RPS6;RPS3A;YBX1;EEF2;C3;LDHA;TUBA1B;FTH1;CFL1;PGK1;RPS20;CALM2;TPT1;TGM2
Camptothecin-2.5 mg/kg in Saline-Rat-Heart-3d-up	14/286	9.78841e-08	6.44594e-07	0	0	6.00626	96.938	ITGB1;NPM1;RPL10;RPS3A;VEGFA;LDHA;FTH1;CFL1;TXNIP;P4HB;SLC38A2;CALM2;TPT1;TGM2
Clemastine-2500 mg/kg in CMC-Rat-Heart-3d-up	14/286	9.78841e-08	6.44056e-07	0	0	6.00626	96.938	HSPA8;JUN;NPM1;RPS6;RPS3A;YBX1;VEGFA;ALDH3A1;RPS19;FTH1;LCN2;TXNIP;TPT1;TGM2
Cloxacillin-1200 mg/kg in Water-Rat-Kidney-3d-dn	14/286	9.78841e-08	6.43518e-07	0	0	6.00626	96.938	RPL10;RPL23;RPS6;CTGF;AKAP12;LDHA;H1F0;TUBA1B;RPS19;SPP1;TXNIP;P4HB;SLC38A2;TPT1
Etidronate-1005 mg/kg in Water-Rat-Heart-5d-up	14/286	9.78841e-08	6.42982e-07	0	0	6.00626	96.938	NPM1;RPL10;RPS6;RPS3A;ATP1B1;LDHA;FTH1;PGK1;TXNIP;VIM;SLC38A2;CALM2;TPT1;TGM2
Furosemide-375 mg/kg in CMC-Rat-Kidney-1d-dn	14/286	9.78841e-08	6.42446e-07	0	0	6.00626	96.938	TRAM1;NPM1;RPL10;IGFBP3;YBX1;EEF2;H1F0;PSAT1;FTH1;CFL1;PGK1;P4HB;SLC38A2;TGM2
Lead (II) Acetate-200 mg/kg in Saline-Rat-Liver-0.25d-up	14/286	9.78841e-08	6.41911e-07	0	0	6.00626	96.938	HSPA8;NQO1;TRAM1;RPS6;RPS3A;YBX1;ICAM1;C3;LDHA;RPS19;PLAU;FTH1;PGK1;P4HB
Rofecoxib-3 mg/kg in Corn Oil-Rat-Heart-5d-dn	14/286	9.78841e-08	6.41377e-07	0	0	6.00626	96.938	RPL10;TPM1;RPS6;RPS3A;IFIT2;CTGF;VEGFA;LDHA;TUBA1B;FTH1;TXNIP;SLC38A2;CALM2;TGM2
Rolipram-75 mg/kg in CMC-Rat-Liver-5d-up	14/286	9.78841e-08	6.40844e-07	0	0	6.00626	96.938	ITGB1;NQO1;NPM1;RPL10;RPS3A;YBX1;ATP1B1;VEGFA;C3;FASN;LCN2;SLC38A2;CALM2;TPT1
Sulfisoxazole-2500 mg/kg in Corn Oil-Rat-Liver-3d-up	14/286	9.78841e-08	6.40311e-07	0	0	6.00626	96.938	HSPA8;NQO1;RPL23;RPS6;YBX1;ICAM1;C3;RPS19;FTH1;PGK1;LCN2;TXNIP;P4HB;SLC38A2
Venlafaxine-320 mg/kg in Water-Rat-Kidney-5d-dn	14/286	9.78841e-08	6.3978e-07	0	0	6.00626	96.938	HSPA8;JUN;RPL10;RPL23;RPS6;RPS3A;YBX1;ATP1B1;EEF2;TUBA1B;RPS19;PGK1;RPS20;TPT1
Lovastatin-450 mg/kg in Corn Oil-Rat-Kidney-0.25d-up	15/333	9.94406e-08	6.49415e-07	0	0	5.527	89.1157	HSPA8;JUN;RPL10;RPS6;RPS3A;CTGF;LDHA;TUBA1B;PSMD3;SPP1;TXNIP;RPS20;P4HB;CALM2;TPT1
Oxaliplatin-8 mg/kg in Saline-Rat-Bone marrow-3d-up	15/333	9.94406e-08	6.48877e-07	0	0	5.527	89.1157	TRAM1;NPM1;RPL10;YBX1;CTGF;C3;LDHA;FTH1;CFL1;PGK1;LCN2;SPP1;P4HB;CALM2;RAI14
123-Trichloropropane-108 mg/kg in CMC-Rat-Heart-1d-dn	14/287	1.02186e-07	6.66237e-07	0	0	5.98534	96.3428	HSPA8;NPM1;RPS6;RPS3A;YBX1;CTGF;LDHA;TUBA1B;RPS19;TXNIP;VIM;P4HB;CALM2;TPT1
Benzocaine-1100 mg/kg in Corn Oil-Rat-Liver-1d-dn	14/287	1.02186e-07	6.65685e-07	0	0	5.98534	96.3428	JUN;RPL10;RPS6;RPS3A;ATP1B1;ICAM1;C3;LDHA;H1F0;TUBA1B;FASN;PSMD3;PGK1;TPT1
Econazole-334 mg/kg in Corn Oil-Rat-Liver-3d-up	14/287	1.02186e-07	6.65135e-07	0	0	5.98534	96.3428	ABCC3;HSPA8;NQO1;GPX2;NPM1;RPS6;RPS3A;NAP1L1;EEF2;PLAU;FTH1;PSMD3;RPS20;RAI14
Lamotrigine-26 mg/kg in CMC-Rat-Heart-3d-up	14/287	1.02186e-07	6.64586e-07	0	0	5.98534	96.3428	ITGB1;NPM1;RPL10;IGFBP3;TPM1;RPS3A;YBX1;EEF2;CTGF;VEGFA;FTH1;TXNIP;TPT1;TGM2
Oxytetracycline-1500 mg/kg in Water-Rat-Liver-5d-dn	14/287	1.02186e-07	6.64038e-07	0	0	5.98534	96.3428	HSPA8;RPL23;RPS6;RPS3A;YBX1;ICAM1;C3;LDHA;RPS19;FTH1;FASN;PGK1;P4HB;CALM2
Rolipram-75 mg/kg in CMC-Rat-Heart-1d-dn	14/287	1.02186e-07	6.6349e-07	0	0	5.98534	96.3428	HSPA8;RPL10;TPM1;RPS6;EEF2;CTGF;LDHA;TUBA1B;RPS19;CFL1;PGK1;VIM;P4HB;CALM2
Etoposide-188 mg/kg in Corn Oil-Rat-Liver-0.25d-up	16/383	1.02768e-07	6.66723e-07	0	0	5.12582	82.4785	TRAM1;NPM1;RPL10;RPL23;RPS6;YBX1;ATP1B1;ICAM1;C3;TUBA1B;PLAU;FTH1;FASN;PGK1;P4HB;SLC38A2
Cisplatin-1.17 mg/kg in Saline-Rat-Spleen-3d-dn	15/334	1.0339e-07	6.70206e-07	0	0	5.51045	88.6343	RPL23;RPS6;ASNS;RPS3A;NAP1L1;YBX1;EEF2;LDHA;H1F0;TUBA1B;CFL1;VIM;P4HB;CALM2;TPT1
Acyclovir-980 mg/kg in Saline-Rat-Bone marrow-5d-up	14/288	1.06657e-07	6.90816e-07	0	0	5.96455	95.7528	TRAM1;NPM1;RPL10;RPL23;LDHA;TUBA1B;RPS19;FTH1;CFL1;PGK1;LCN2;TXNIP;CALM2;TPT1
Amitraz-75 mg/kg in CMC-Rat-Heart-5d-up	14/288	1.06657e-07	6.90248e-07	0	0	5.96455	95.7528	HSPA8;NPM1;ANXA2;RPL10;RPL23;IGFBP3;RPS6;RPS3A;YBX1;CTGF;VEGFA;ALDH3A1;RPS19;RPS20
Bisphenol A-610 mg/kg in Corn Oil-Rat-Bone marrow-3d-dn	14/288	1.06657e-07	6.89681e-07	0	0	5.96455	95.7528	HSPA8;NPM1;RPL23;ASNS;LDHA;H1F0;TUBA1B;RPS19;FTH1;CFL1;PSMD3;PGK1;P4HB;CALM2
Bithionol-59 mg/kg in Corn Oil-Rat-Bone marrow-3d-dn	14/288	1.06657e-07	6.89115e-07	0	0	5.96455	95.7528	HSPA8;TRAM1;NPM1;RPL10;ASNS;LDHA;TUBA1B;RPS19;FTH1;CFL1;PGK1;P4HB;CALM2;RAI14
Emetine-1 mg/kg in Saline-Rat-Heart-1d-dn	14/288	1.06657e-07	6.88551e-07	0	0	5.96455	95.7528	HSPA8;RPL10;RPL23;RPS6;RPS3A;YBX1;ATP1B1;EEF2;ICAM1;RPS19;PSMD3;SLC38A2;TPT1;TGM2
Epirubicin-2.7 mg/kg in Saline-Rat-Heart-5d-up	14/288	1.06657e-07	6.87987e-07	0	0	5.96455	95.7528	NPM1;ANXA2;RPL10;STAT1;RPL23;IGFBP3;RPS6;CTGF;RPS19;FTH1;TXNIP;RPS20;VIM;TGM2
Griseofulvin-75 uM in DMSO-Rat-Primary rat hepatocytes-0.67d-up	14/288	1.06657e-07	6.87424e-07	0	0	5.96455	95.7528	HSPA8;NQO1;TRAM1;NPM1;RPL23;ASNS;VEGFA;LDHA;PSAT1;FTH1;PSMD3;LCN2;RPS20;CALM2
Hydrocortisone-56 mg/kg in Corn Oil-Rat-Kidney-3d-dn	14/288	1.06657e-07	6.86862e-07	0	0	5.96455	95.7528	HSPA8;JUN;TRAM1;RPL23;RPS3A;H1F0;TUBA1B;FTH1;CFL1;TXNIP;P4HB;CALM2;TPT1;TGM2
Indomethacin-10 mg/kg in Corn Oil-Rat-Liver-1d-up	14/288	1.06657e-07	6.863e-07	0	0	5.96455	95.7528	NQO1;TRAM1;RPL10;RPL23;RPS6;ASNS;C3;PSAT1;CFL1;LCN2;RPS20;P4HB;SLC38A2;TPT1
L-Phenylephrine-0.44 mg/kg in Saline-Rat-Heart-1d-dn	14/288	1.06657e-07	6.8574e-07	0	0	5.96455	95.7528	HSPA8;RPL23;TPM1;RPS6;RPS3A;YBX1;ATP1B1;EEF2;ICAM1;CTGF;TUBA1B;VIM;SLC38A2;TPT1
N-Nitrosodiethylamine-34 mg/kg in Saline-Rat-Liver-3d-dn	14/288	1.06657e-07	6.85181e-07	0	0	5.96455	95.7528	RPL10;RPL23;RPS3A;ICAM1;VEGFA;C3;FADS2;LDHA;H1F0;FASN;LCN2;RPS20;CALM2;TPT1
Nimesulide-30 mg/kg in Corn Oil-Rat-Liver-1d-up	14/288	1.06657e-07	6.84622e-07	0	0	5.96455	95.7528	TRAM1;NPM1;RPS6;ASNS;RPS3A;C3;FADS2;RPS19;PLAU;PSAT1;TXNIP;RPS20;P4HB;RAI14
Pravastatin-1200 mg/kg in Corn Oil-Rat-Liver-5d-up	14/288	1.06657e-07	6.84065e-07	0	0	5.96455	95.7528	NPM1;RPL10;RPL23;RPS6;ATP1B1;EEF2;LDHA;TUBA1B;RPS19;CFL1;RPS20;P4HB;SLC38A2;CALM2
Temafloxacin-1000 mg/kg in CMC-Rat-Liver-5d-up	14/288	1.06657e-07	6.83508e-07	0	0	5.96455	95.7528	NPM1;RPL10;RPL23;RPS6;RPS3A;VEGFA;FADS2;FTH1;LCN2;TXNIP;RPS20;SLC38A2;CALM2;TPT1
Daunorubicin-3.25 mg/kg in Saline-Rat-Liver-5d-dn	15/335	1.07481e-07	6.88231e-07	0	0	5.494	88.1565	HSPA8;JUN;RPL10;RPL23;RPS6;RPS3A;YBX1;EEF2;LDHA;TUBA1B;RPS19;FASN;PGK1;RPS20;CALM2
Streptomycin-120 mg/kg in Saline-Rat-Bone marrow-3d-up	15/335	1.07481e-07	6.87672e-07	0	0	5.494	88.1565	ITGB1;TRAM1;NPM1;RPL10;ASNS;YBX1;AKAP12;LDHA;H1F0;TUBA1B;RPS19;FTH1;VIM;P4HB;SLC38A2
Aspirin-167 mg/kg in Corn Oil-Rat-Liver-3d-dn	14/289	1.11305e-07	7.11555e-07	0	0	5.94391	95.168	HSPA8;NQO1;NPM1;RPL23;RPS6;RPS3A;ICAM1;C3;H1F0;PLAU;PGK1;TXNIP;RPS20;P4HB
Danazol-95 uM in DMSO-Rat-Primary rat hepatocytes-0.67d-up	14/289	1.11305e-07	7.10978e-07	0	0	5.94391	95.168	ITGB1;HSPA8;NPM1;RPL10;RPS6;ASNS;YBX1;SLC7A5;LDHA;FTH1;LCN2;P4HB;SLC38A2;TPT1
Ofloxacin-30 mg/kg in Water-Rat-Heart-3d-up	14/289	1.11305e-07	7.10402e-07	0	0	5.94391	95.168	ITGB1;HSPA8;NPM1;RPL23;RPS6;RPS3A;YBX1;ATP1B1;RPS19;FTH1;TXNIP;RPS20;VIM;CALM2
Promethazine-113 mg/kg in Saline-Rat-Liver-0.25d-up	14/289	1.11305e-07	7.09827e-07	0	0	5.94391	95.168	HSPA8;NQO1;NPM1;RPL10;RPS6;RPS3A;EEF2;ICAM1;VEGFA;RPS19;PLAU;FTH1;P4HB;TPT1
Roflumilast-17 mg/kg in CMC-Rat-Heart-3d-up	14/289	1.11305e-07	7.09252e-07	0	0	5.94391	95.168	ITGB1;NPM1;RPL10;RPL23;RPS6;RPS3A;YBX1;RPS19;FTH1;LCN2;TXNIP;RPS20;TPT1;TGM2
Venlafaxine-320 mg/kg in Water-Rat-Liver-1d-up	15/336	1.11719e-07	7.11317e-07	0	0	5.47765	87.6823	HSPA8;TRAM1;RPL10;RPL23;RPS6;ATP1B1;EEF2;FTH1;FASN;LCN2;TXNIP;RPS20;VIM;P4HB;CALM2
Amikacin-160 mg/kg in Saline-Rat-Kidney-28d-dn	13/245	1.12795e-07	7.17586e-07	0	0	6.51058	104.154	HSPA8;RPL23;RPS6;PLOD2;RPS3A;ATP1B1;CTGF;VEGFA;H1F0;PSAT1;PSMD3;TXNIP;RPS20
Modafinil-325 mg/kg in Saline-Rat-Liver-5d-dn	13/245	1.12795e-07	7.17007e-07	0	0	6.51058	104.154	HSPA8;ATP1B1;EEF2;VEGFA;C3;LDHA;H1F0;FTH1;FASN;PGK1;TXNIP;SLC38A2;TPT1
Meloxicam-33 mg/kg in Corn Oil-Rat-Kidney-1d-up	15/337	1.16108e-07	7.37471e-07	0	0	5.4614	87.2117	HSPA8;NPM1;RPL23;RPS6;RPS3A;LDHA;RPS19;PSAT1;FTH1;LCN2;SPP1;TXNIP;RPS20;CALM2;TPT1
Primaquine-45 mg/kg in CMC-Rat-Liver-1d-up	15/337	1.16108e-07	7.36877e-07	0	0	5.4614	87.2117	HSPA8;NQO1;RPL10;RPL23;RPS6;YBX1;EEF2;VEGFA;C3;RPS19;FTH1;CFL1;PGK1;RPS20;TPT1
Buspirone-196 mg/kg in CMC-Rat-Heart-3d-up	14/290	1.16134e-07	7.36453e-07	0	0	5.92342	94.5882	HSPA8;JUN;RPL10;TPM1;RPS6;RPS3A;CTGF;VEGFA;RPS19;FTH1;CFL1;TXNIP;TPT1;TGM2
Cilostazol-1500 mg/kg in CMC-Rat-Heart-3d-dn	14/290	1.16134e-07	7.3586e-07	0	0	5.92342	94.5882	HSPA8;RPL23;RPS3A;YBX1;ATP1B1;CTGF;VEGFA;RPS19;FTH1;PGK1;TXNIP;RPS20;VIM;SLC38A2
Diethylstilbestrol-280 mg/kg in Corn Oil-Rat-Liver-1d-up	14/290	1.16134e-07	7.35269e-07	0	0	5.92342	94.5882	HSPA8;NQO1;NPM1;RPL23;RPS6;RPS3A;TUBA1B;RPS19;PSAT1;CFL1;RPS20;P4HB;CALM2;RAI14
Digitoxin-1 mg/kg in Corn Oil-Rat-Heart-0.25d-up	14/290	1.16134e-07	7.34678e-07	0	0	5.92342	94.5882	HSPA8;JUN;NPM1;ANXA2;RPL10;YBX1;EEF2;LDHA;H1F0;PSMD3;TXNIP;P4HB;TPT1;RAI14
Diisopropyl Fluorophosphate-3.75 mg/kg in Water-Rat-Heart-3d-dn	14/290	1.16134e-07	7.34089e-07	0	0	5.92342	94.5882	ITGB1;RPL10;TPM1;RPS6;YBX1;CTGF;LDHA;H1F0;FTH1;PGK1;RPS20;VIM;CALM2;TPT1
Ethylene Glycol-352 mg/kg in Water-Rat-Bone marrow-1d-up	14/290	1.16134e-07	7.335e-07	0	0	5.92342	94.5882	NPM1;RPL10;RPL23;RPS6;RPS3A;YBX1;FTH1;CFL1;PGK1;SPP1;VIM;CALM2;TPT1;RAI14
Gemfibrozil-700 mg/kg in Corn Oil-Rat-Skeletal muscle-3d-dn	14/290	1.16134e-07	7.32912e-07	0	0	5.92342	94.5882	ITGB1;HSPA8;TPM1;VEGFA;LDHA;TUBA1B;CFL1;PGK1;TXNIP;VIM;SLC38A2;CALM2;TPT1;TGM2
Indomethacin-5 mg/kg in Corn Oil-Rat-Liver-3d-up	14/290	1.16134e-07	7.32325e-07	0	0	5.92342	94.5882	NQO1;TRAM1;RPL23;RPS6;ASNS;C3;RPS19;PSAT1;FTH1;CFL1;LCN2;RPS20;P4HB;TGM2
Leflunomide-30 mg/kg in Corn Oil-Rat-Spleen-1d-dn	14/290	1.16134e-07	7.3174e-07	0	0	5.92342	94.5882	HSPA8;TRAM1;NPM1;RPL23;RPS6;NAP1L1;YBX1;RPS19;FTH1;CFL1;PGK1;RPS20;VIM;RAI14
Celecoxib-100 uM in DMSO-Rat-Primary rat hepatocytes-1d-up	13/246	1.18257e-07	7.44518e-07	0	0	6.48411	103.424	ITGB1;GPX2;NPM1;RPL10;RPS6;RPS3A;YBX1;TUBA1B;CFL1;PGK1;LCN2;P4HB;CALM2
Fenofibrate-43 mg/kg in Corn Oil-Rat-Kidney-3d-up	13/246	1.18257e-07	7.43924e-07	0	0	6.48411	103.424	GPX2;NPM1;RPL10;RPL23;RPS6;ATP1B1;EEF2;VEGFA;LDHA;FTH1;SPP1;RPS20;SLC38A2
Ofloxacin-3000 mg/kg in Water-Rat-Kidney-1d-up	16/387	1.18399e-07	7.4422e-07	0	0	5.07284	80.9078	ITGB1;NPM1;RPS3A;ATP1B1;CTGF;LDHA;PLAU;FTH1;CFL1;PGK1;SPP1;TXNIP;P4HB;SLC38A2;TPT1;TGM2
Acyclovir-980 mg/kg in Saline-Rat-Liver-1d-dn	15/338	1.20652e-07	7.57779e-07	0	0	5.44524	86.7446	RPL10;RPS6;RPS3A;EEF2;ICAM1;C3;FADS2;LDHA;H1F0;RPS19;FTH1;FASN;RPS20;CALM2;TPT1
Genistein-20 mg/kg in Corn Oil-Rat-Liver-5d-dn	15/338	1.20652e-07	7.57176e-07	0	0	5.44524	86.7446	HSPA8;RPL23;RPS3A;YBX1;ICAM1;VEGFA;C3;LDHA;FTH1;PGK1;TXNIP;P4HB;SLC38A2;TPT1;RAI14
Methyl Salicylate-444 mg/kg in Corn Oil-Rat-Liver-5d-up	15/338	1.20652e-07	7.56573e-07	0	0	5.44524	86.7446	NQO1;JUN;TRAM1;NPM1;RPL10;RPS3A;ATP1B1;LDHA;CFL1;PGK1;TXNIP;RPS20;SLC38A2;CALM2;TPT1
Ramipril-620 uM in DMSO-Rat-Primary rat hepatocytes-1d-dn	15/338	1.20652e-07	7.55971e-07	0	0	5.44524	86.7446	HSPA8;NQO1;JUN;TRAM1;GPX2;NPM1;RPS3A;ATP1B1;VEGFA;RPS19;FTH1;CFL1;CALM2;TPT1;TGM2
Cytarabine-487 mg/kg in Saline-Rat-Liver-5d-dn	14/291	1.21152e-07	7.58503e-07	0	0	5.90306	94.0135	IGFBP3;RPS6;EEF2;VEGFA;C3;LDHA;RPS19;FASN;CFL1;PGK1;RPS20;P4HB;SLC38A2;CALM2
Lansoprazole-240 uM in DMSO-Rat-Primary rat hepatocytes-0.67d-up	14/291	1.21152e-07	7.57901e-07	0	0	5.90306	94.0135	HSPA8;NQO1;GPX2;NPM1;RPL10;RPL23;ASNS;SLC7A5;LDHA;PSAT1;FTH1;PSMD3;PGK1;SLC38A2
Mestranol-250 mg/kg in CMC-Rat-Liver-3d-up	14/291	1.21152e-07	7.57299e-07	0	0	5.90306	94.0135	NQO1;NPM1;RPL10;RPL23;RPS6;RPS3A;VEGFA;RPS19;FTH1;CFL1;RPS20;P4HB;CALM2;TGM2
Methapyrilene-300 uM in DMSO-Rat-Primary rat hepatocytes-0.67d-up	14/291	1.21152e-07	7.56699e-07	0	0	5.90306	94.0135	ITGB1;HSPA8;NPM1;RPL10;RPL23;RPS6;YBX1;CTGF;LDHA;RPS19;LCN2;RPS20;P4HB;SLC38A2
Mitoxantrone-2 mg/kg in Saline-Rat-Heart-3d-up	14/291	1.21152e-07	7.56099e-07	0	0	5.90306	94.0135	ITGB1;RPL10;RPL23;ATP1B1;CTGF;VEGFA;AKAP12;RPS19;PGK1;LCN2;TXNIP;RPS20;SLC38A2;TPT1
Sildenafil-300 mg/kg in Saline-Rat-Liver-5d-dn	14/291	1.21152e-07	7.555e-07	0	0	5.90306	94.0135	ANXA2;RPL10;RPS6;RPS3A;YBX1;ATP1B1;EEF2;ICAM1;C3;LDHA;FTH1;PGK1;SLC38A2;TGM2
Tolazamide-1500 mg/kg in CMC-Rat-Kidney-1d-dn	14/291	1.21152e-07	7.54903e-07	0	0	5.90306	94.0135	RPL23;RPS6;YBX1;ATP1B1;EEF2;VEGFA;H1F0;TUBA1B;RPS19;PSAT1;SPP1;RPS20;SLC38A2;TGM2
Cyclosporin A-350 mg/kg in Corn Oil-Rat-Kidney-1d-up	16/388	1.2263e-07	7.63506e-07	0	0	5.05977	80.5216	TRAM1;RPL10;RPL23;RPS6;RPS3A;ATP1B1;IFIT2;LDHA;RPS19;PSAT1;FTH1;SPP1;RPS20;CALM2;TPT1;TGM2
Ascorbic Acid-2000 mg/kg in Water-Rat-Kidney-5d-up	15/339	1.25357e-07	7.79867e-07	0	0	5.42918	86.281	NPM1;RPL10;ATP1B1;CTGF;LDHA;H1F0;TUBA1B;FTH1;CFL1;PGK1;SPP1;VIM;SLC38A2;CALM2;TGM2
Furan-24 mg/kg in Corn Oil-Rat-Heart-1d-up	14/292	1.26366e-07	7.85521e-07	0	0	5.88285	93.4437	ITGB1;HSPA8;RPL10;STAT1;RPL23;TPM1;IFIT2;ICAM1;VEGFA;FTH1;P4HB;SLC38A2;TGM2;RAI14
Gentamicin-267 mg/kg in Corn Oil-Rat-Liver-3d-dn	14/292	1.26366e-07	7.84902e-07	0	0	5.88285	93.4437	HSPA8;JUN;RPL10;RPL23;RPS6;RPS3A;VEGFA;FADS2;RPS19;FASN;RPS20;P4HB;CALM2;TPT1
Irinotecan-5 mg/kg in Saline-Rat-Kidney-3d-up	14/292	1.26366e-07	7.84283e-07	0	0	5.88285	93.4437	ITGB1;IGFBP3;ATP1B1;CTGF;AKAP12;LDHA;TUBA1B;PSAT1;FTH1;CFL1;PSMD3;TXNIP;P4HB;SLC38A2
Niacinamide-750 mg/kg in Water-Rat-Liver-5d-up	14/292	1.26366e-07	7.83666e-07	0	0	5.88285	93.4437	NQO1;JUN;NPM1;RPL10;RPS3A;ATP1B1;EEF2;ICAM1;FTH1;CFL1;PGK1;P4HB;SLC38A2;TGM2
Rofecoxib-1550 mg/kg in Corn Oil-Rat-Liver-3d-dn	14/292	1.26366e-07	7.83049e-07	0	0	5.88285	93.4437	HSPA8;RPL10;RPL23;IGFBP3;RPS6;ATP1B1;FADS2;LDHA;H1F0;FASN;RPS20;SLC38A2;CALM2;TPT1
Stannous Fluoride-90 mg/kg in Water-Rat-Kidney-1d-dn	14/292	1.26366e-07	7.82433e-07	0	0	5.88285	93.4437	HSPA8;NPM1;RPL23;ATP1B1;VEGFA;LDHA;H1F0;TUBA1B;PGK1;SPP1;TXNIP;P4HB;CALM2;TPT1
Tetracycline-520 uM in DMSO-Rat-Primary rat hepatocytes-0.67d-up	14/292	1.26366e-07	7.81819e-07	0	0	5.88285	93.4437	HSPA8;NPM1;RPL10;RPL23;RPS6;ASNS;RPS3A;LDHA;TUBA1B;PSAT1;LCN2;RPS20;P4HB;SLC38A2
Carbon Tetrachloride-775 uM in DMSO-Rat-Primary rat hepatocytes-1d-dn	14/293	1.3178e-07	8.14679e-07	0	0	5.86277	92.8788	ITGB1;NPM1;RPL10;RPS6;RPS3A;YBX1;LDHA;TUBA1B;FTH1;CFL1;RPS20;CALM2;TPT1;TGM2
Melatonin-2000 mg/kg in Corn Oil-Rat-Liver-1d-up	14/293	1.3178e-07	8.1404e-07	0	0	5.86277	92.8788	ABCC3;HSPA8;NQO1;NPM1;STAT1;RPS6;EEF2;IFIT2;RPS19;PSAT1;CFL1;PGK1;RPS20;P4HB
Tiapride-1200 mg/kg in Water-Rat-Heart-5d-dn	14/293	1.3178e-07	8.13403e-07	0	0	5.86277	92.8788	ITGB1;RPL23;TPM1;YBX1;ATP1B1;VEGFA;RPS19;FTH1;CFL1;PGK1;RPS20;P4HB;SLC38A2;TPT1
Vinorelbine-1.5 mg/kg in Saline-Rat-Liver-5d-dn	14/293	1.3178e-07	8.12766e-07	0	0	5.86277	92.8788	HSPA8;RPL10;RPS6;RPS3A;EEF2;ICAM1;C3;LDHA;H1F0;TUBA1B;RPS19;FTH1;TXNIP;TPT1
Dexibuprofen-239 mg/kg in CMC-Rat-Kidney-5d-up	15/341	1.35269e-07	8.33633e-07	0	0	5.39733	85.3642	NPM1;RPL10;YBX1;VEGFA;LDHA;RPS19;PLAU;PSMD3;PGK1;SPP1;TXNIP;SLC38A2;CALM2;TPT1;TGM2
Gentian Violet-18 mg/kg in Corn Oil-Rat-Liver-3d-dn	15/341	1.35269e-07	8.32981e-07	0	0	5.39733	85.3642	HSPA8;RPL10;RPL23;RPS6;RPS3A;YBX1;VEGFA;C3;FADS2;RPS19;FTH1;FASN;RPS20;CALM2;TPT1
Hydrazine-45 mg/kg in Water-Rat-Liver-0.25d-up	15/341	1.35269e-07	8.3233e-07	0	0	5.39733	85.3642	TRAM1;NPM1;RPL10;RPL23;RPS6;RPS3A;VEGFA;LDHA;RPS19;FTH1;PGK1;RPS20;P4HB;CALM2;TPT1
Loxoprofen-18 mg/kg in Corn Oil-Rat-Kidney-0.25d-up	15/341	1.35269e-07	8.3168e-07	0	0	5.39733	85.3642	GPX2;RPL10;RPL23;IGFBP3;RPS6;EEF2;LDHA;TUBA1B;RPS19;CFL1;PGK1;SPP1;TXNIP;TPT1;TGM2
Dimethyl Methylphosphonate-1500 mg/kg in Water-Rat-Kidney-1d-up	16/391	1.36164e-07	8.36526e-07	0	0	5.02095	79.3782	ITGB1;TRAM1;RPS3A;ATP1B1;VEGFA;LDHA;TUBA1B;PSAT1;CFL1;PGK1;SPP1;P4HB;SLC38A2;CALM2;TPT1;TGM2
BW-723C86-10 mg/kg in Saline-Rat-Heart-5d-dn	14/294	1.37404e-07	8.43484e-07	0	0	5.84283	92.3187	HSPA8;TPM1;RPS6;RPS3A;YBX1;ATP1B1;EEF2;CTGF;TUBA1B;PGK1;TXNIP;VIM;TPT1;TGM2
CerIVastatin-7 mg/kg in Corn Oil-Rat-Kidney-5d-dn	14/294	1.37404e-07	8.42828e-07	0	0	5.84283	92.3187	RPL10;RPL23;RPS6;RPS3A;ATP1B1;EEF2;LDHA;H1F0;RPS19;PSAT1;PGK1;RPS20;SLC38A2;CALM2
Lidocaine-71 mg/kg in Water-Rat-Heart-3d-dn	14/294	1.37404e-07	8.42172e-07	0	0	5.84283	92.3187	RPL10;TPM1;RPS3A;YBX1;VEGFA;LDHA;TUBA1B;FTH1;PGK1;RPS20;P4HB;SLC38A2;TPT1;RAI14
Methotrexate-0.3 mg/kg in Corn Oil-Rat-Bone marrow-1d-dn	14/294	1.37404e-07	8.41517e-07	0	0	5.84283	92.3187	HSPA8;TRAM1;RPL10;RPL23;RPS6;LDHA;TUBA1B;RPS19;CFL1;PGK1;LCN2;RPS20;VIM;CALM2
Noscapine-570 mg/kg in CMC-Rat-Bone marrow-3d-dn	14/294	1.37404e-07	8.40863e-07	0	0	5.84283	92.3187	TRAM1;NPM1;RPL10;RPL23;ASNS;YBX1;TUBA1B;RPS19;FTH1;VIM;P4HB;SLC38A2;CALM2;RAI14
Primidone-750 mg/kg in CMC-Rat-Liver-1d-up	14/294	1.37404e-07	8.4021e-07	0	0	5.84283	92.3187	HSPA8;NQO1;RPL10;RPS3A;YBX1;EEF2;FADS2;LDHA;FASN;CFL1;PSMD3;PGK1;CALM2;TPT1
Propylene Glycol-2000 mg/kg in Water-Rat-Liver-3d-up	14/294	1.37404e-07	8.39558e-07	0	0	5.84283	92.3187	NQO1;JUN;RPL10;RPS6;RPS3A;ATP1B1;VEGFA;FADS2;LDHA;FTH1;PGK1;RPS20;SLC38A2;TGM2
Risperidone-22 mg/kg in CMC-Rat-Heart-1d-dn	14/294	1.37404e-07	8.38907e-07	0	0	5.84283	92.3187	ITGB1;HSPA8;JUN;NPM1;RPL10;RPL23;IGFBP3;CTGF;VEGFA;RPS19;TXNIP;VIM;SLC38A2;TGM2
S(-)-Carbidopa-1200 mg/kg in CMC-Rat-Brain-3d-dn	14/294	1.37404e-07	8.38258e-07	0	0	5.84283	92.3187	HSPA8;RPL10;RPL23;RPS6;RPS3A;YBX1;ATP1B1;PSAT1;FTH1;RPS20;VIM;SLC38A2;TPT1;RAI14
Cobalt(II) Acetylacetonate-100 mg/kg in Corn Oil-Rat-Heart-1d-up	15/342	1.40487e-07	8.56408e-07	0	0	5.38155	84.9109	ITGB1;JUN;NPM1;RPL10;RPL23;ATP1B1;CTGF;LDHA;TUBA1B;FTH1;CFL1;PGK1;TXNIP;P4HB;SLC38A2
Naproxen-134 mg/kg in Corn Oil-Rat-Liver-0.25d-up	15/342	1.40487e-07	8.55746e-07	0	0	5.38155	84.9109	HSPA8;JUN;TRAM1;RPL10;RPL23;RPS6;RPS3A;C3;RPS19;FTH1;CFL1;LCN2;RPS20;P4HB;TPT1
Aminocaproic Acid-2000 mg/kg in Water-Rat-Kidney-5d-dn	13/250	1.42563e-07	8.67715e-07	0	0	6.38037	100.577	HSPA8;NPM1;RPL23;ATP1B1;H1F0;RPS19;PGK1;SPP1;TXNIP;P4HB;SLC38A2;TPT1;TGM2
Simvastatin-1200 mg/kg in Corn Oil-Rat-Kidney-1d-dn	13/250	1.42563e-07	8.67045e-07	0	0	6.38037	100.577	NPM1;RPL10;RPL23;YBX1;EEF2;LDHA;TUBA1B;CFL1;PGK1;SPP1;P4HB;SLC38A2;TPT1
Amprenavir-600 mg/kg in CMC-Rat-Kidney-1d-dn	14/295	1.43243e-07	8.70508e-07	0	0	5.82302	91.7634	TRAM1;NPM1;RPL10;RPL23;YBX1;LDHA;FTH1;PGK1;SPP1;RPS20;P4HB;SLC38A2;CALM2;TPT1
Cholecalciferol-8 mg/kg in CMC-Rat-Kidney-1d-dn	14/295	1.43243e-07	8.69837e-07	0	0	5.82302	91.7634	ITGB1;RPL10;RPL23;IGFBP3;RPS6;RPS3A;ATP1B1;VEGFA;H1F0;RPS19;PGK1;RPS20;SLC38A2;CALM2
Famciclovir-112 mg/kg in Saline-Rat-Liver-1d-dn	14/295	1.43243e-07	8.69167e-07	0	0	5.82302	91.7634	RPL10;RPL23;RPS6;RPS3A;YBX1;EEF2;C3;FADS2;LDHA;RPS19;FASN;P4HB;CALM2;TPT1
N-Nitrosodiethylamine-1.67 mg/kg in Saline-Rat-Bone marrow-1d-up	14/295	1.43243e-07	8.68497e-07	0	0	5.82302	91.7634	ITGB1;HSPA8;RPS6;RPS3A;NAP1L1;C3;LDHA;RPS19;FTH1;CFL1;LCN2;VIM;CALM2;TPT1
Tranilast-1100 mg/kg in CMC-Rat-Heart-3d-dn	14/295	1.43243e-07	8.67829e-07	0	0	5.82302	91.7634	HSPA8;RPL10;RPL23;TPM1;RPS6;RPS3A;YBX1;VEGFA;LDHA;TUBA1B;RPS19;PGK1;RPS20;VIM
Cyclosporin A-8.5 uM in DMSO-Rat-Primary rat hepatocytes-0.67d-up	15/343	1.45887e-07	8.83172e-07	0	0	5.36586	84.461	ITGB1;HSPA8;NQO1;NPM1;RPL10;RPL23;RPS6;ASNS;EEF2;VEGFA;TUBA1B;RPS19;FTH1;P4HB;TPT1
Ibufenac-500 mg/kg in Corn Oil-Rat-Liver-5d-dn	15/343	1.45887e-07	8.82494e-07	0	0	5.36586	84.461	HSPA8;TRAM1;RPL10;RPL23;IGFBP3;RPS6;EEF2;C3;LDHA;TUBA1B;RPS19;FASN;PSMD3;PGK1;P4HB
Sparteine-2222 uM in DMSO-Rat-Primary rat hepatocytes-1d-dn	15/343	1.45887e-07	8.81817e-07	0	0	5.36586	84.461	TRAM1;NPM1;RPL10;RPS6;RPS3A;EEF2;RPS19;FTH1;CFL1;PGK1;RPS20;P4HB;CALM2;TPT1;TGM2
Trans-Platinum(II)Diammine Dichloride-0.5 mg/kg in Saline-Rat-Kidney-28d-dn	15/343	1.45887e-07	8.81141e-07	0	0	5.36586	84.461	HSPA8;NPM1;RPL10;IGFBP3;RPS6;ATP1B1;H1F0;PLAU;PSAT1;FTH1;PGK1;SPP1;TXNIP;SLC38A2;TPT1
Glycidol-210 mg/kg in Water-Rat-Kidney-1d-up	16/393	1.45927e-07	8.80703e-07	0	0	4.99539	78.6283	ITGB1;TRAM1;RPL10;RPS3A;ATP1B1;LDHA;H1F0;TUBA1B;PLAU;CFL1;PGK1;SPP1;P4HB;CALM2;TPT1;TGM2
Cobalt(II) Acetylacetonate-100 mg/kg in Corn Oil-Rat-Kidney-3d-dn	13/251	1.49301e-07	9.00376e-07	0	0	6.35495	99.8827	HSPA8;TRAM1;NPM1;RPL10;RPS19;PSAT1;FTH1;CFL1;PGK1;TXNIP;P4HB;SLC38A2;TPT1
Allylamine-75 mg/kg in Water-Rat-Heart-1d-up	14/296	1.49304e-07	8.99711e-07	0	0	5.80335	91.2129	ITGB1;HSPA8;RPS6;RPS3A;YBX1;LDHA;CFL1;VIM;P4HB;SLC38A2;CALM2;TPT1;TGM2;RAI14
Antimycin A-0.03 uM in DMSO-Rat-Primary rat hepatocytes-0.67d-up	14/296	1.49304e-07	8.99023e-07	0	0	5.80335	91.2129	ITGB1;NQO1;ANXA2;YBX1;VEGFA;C3;LDHA;TUBA1B;RPS19;LCN2;TXNIP;RPS20;P4HB;SLC38A2
Bleomycin A2-12 mg/kg in Saline-Rat-Bone marrow-3d-dn	14/296	1.49304e-07	8.98336e-07	0	0	5.80335	91.2129	HSPA8;RPL10;RPL23;RPS3A;SLC7A5;LDHA;H1F0;TUBA1B;RPS19;CFL1;LCN2;TXNIP;VIM;CALM2
Carboplatin-14 mg/kg in Saline-Rat-Kidney-5d-up	14/296	1.49304e-07	8.9765e-07	0	0	5.80335	91.2129	GPX2;RPL10;IGFBP3;RPS6;EEF2;CTGF;H1F0;RPS19;PLAU;PSAT1;CFL1;P4HB;CALM2;TGM2
Doxorubicin-3 mg/kg in Saline-Rat-Heart-5d-up	14/296	1.49304e-07	8.96966e-07	0	0	5.80335	91.2129	HSPA8;NPM1;RPL10;RPL23;RPS6;RPS3A;YBX1;CTGF;ALDH3A1;RPS19;RPS20;VIM;TPT1;TGM2
Epalrestat-2500 mg/kg in CMC-Rat-Liver-3d-up	14/296	1.49304e-07	8.96282e-07	0	0	5.80335	91.2129	ABCC3;NQO1;NPM1;RPL10;RPS6;ASNS;RPS3A;ATP1B1;RPS19;PSAT1;PSMD3;RPS20;P4HB;SLC38A2
Ergocalciferol-15 mg/kg in CMC-Rat-Kidney-3d-up	14/296	1.49304e-07	8.95599e-07	0	0	5.80335	91.2129	GPX2;RPS6;RPS3A;NAP1L1;ATP1B1;CTGF;LDHA;RPS19;PGK1;LCN2;SPP1;TXNIP;RPS20;SLC38A2
Etoposide-188 mg/kg in Corn Oil-Rat-Liver-5d-dn	14/296	1.49304e-07	8.94918e-07	0	0	5.80335	91.2129	RPL10;RPS3A;YBX1;EEF2;ICAM1;C3;FADS2;LDHA;FTH1;CFL1;PGK1;SLC38A2;CALM2;TPT1
Ketoconazole-227 mg/kg in Corn Oil-Rat-Liver-0.25d-up	14/296	1.49304e-07	8.94237e-07	0	0	5.80335	91.2129	HSPA8;NQO1;RPL10;RPL23;RPS6;ATP1B1;EEF2;FADS2;H1F0;RPS19;PLAU;FTH1;RPS20;CALM2
Lovastatin-1500 mg/kg in Corn Oil-Rat-Skeletal muscle-3d-dn	14/296	1.49304e-07	8.93558e-07	0	0	5.80335	91.2129	ITGB1;HSPA8;RPL10;RPL23;TPM1;RPS6;RPS3A;LDHA;RPS19;FTH1;CFL1;RPS20;VIM;CALM2
Mifepristone-3 mg/kg in Corn Oil-Rat-Liver-0.25d-dn	14/296	1.49304e-07	8.92879e-07	0	0	5.80335	91.2129	YBX1;ICAM1;VEGFA;C3;FADS2;LDHA;FTH1;CFL1;PGK1;TXNIP;RPS20;P4HB;TPT1;RAI14
Penciclovir-1200 mg/kg in Corn Oil-Rat-Bone marrow-3d-dn	14/296	1.49304e-07	8.92202e-07	0	0	5.80335	91.2129	HSPA8;TRAM1;NPM1;RPL10;RPL23;ASNS;TUBA1B;RPS19;FTH1;CFL1;P4HB;SLC38A2;TPT1;RAI14
Perhexiline-320 mg/kg in CMC-Rat-Liver-3d-dn	14/296	1.49304e-07	8.91525e-07	0	0	5.80335	91.2129	HSPA8;RPL23;RPS6;EEF2;FADS2;LDHA;RPS19;FTH1;FASN;CFL1;RPS20;P4HB;CALM2;TPT1
Sulindac-132 mg/kg in Corn Oil-Rat-Liver-1d-up	14/296	1.49304e-07	8.9085e-07	0	0	5.80335	91.2129	HSPA8;NQO1;TRAM1;RPL23;RPS6;RPS3A;EEF2;C3;TUBA1B;RPS19;PSAT1;CFL1;LCN2;RPS20
Thioguanine-12 mg/kg in Corn Oil-Rat-Liver-0.25d-up	14/296	1.49304e-07	8.90176e-07	0	0	5.80335	91.2129	HSPA8;NPM1;RPL10;RPL23;IGFBP3;RPS6;RPS3A;ATP1B1;RPS19;FTH1;RPS20;P4HB;SLC38A2;RAI14
Valproic Acid-850 mg/kg in Water-Rat-Liver-5d-up	14/296	1.49304e-07	8.89502e-07	0	0	5.80335	91.2129	HSPA8;TRAM1;NPM1;RPL10;RPL23;RPS6;RPS3A;YBX1;ICAM1;RPS19;FTH1;TXNIP;RPS20;CALM2
Zomepirac-11 mg/kg in Saline-Rat-Liver-5d-up	14/296	1.49304e-07	8.8883e-07	0	0	5.80335	91.2129	HSPA8;RPL23;RPS6;RPS3A;ICAM1;VEGFA;C3;LDHA;TUBA1B;RPS19;PLAU;TXNIP;RPS20;TPT1
Carmustine-16 mg/kg in Corn Oil-Rat-Liver-1d-up	15/344	1.51474e-07	9.01066e-07	0	0	5.35026	84.0144	HSPA8;NQO1;TRAM1;RPL23;RPS6;ASNS;RPS3A;EEF2;FADS2;TUBA1B;PLAU;FTH1;CFL1;RPS20;TPT1
Benzothiazyl Disulfide-2600 mg/kg in Corn Oil-Rat-Kidney-3d-up	14/297	1.55597e-07	9.24892e-07	0	0	5.78381	90.667	HSPA8;NQO1;JUN;RPS6;RPS3A;CTGF;H1F0;PSAT1;CFL1;TXNIP;RPS20;VIM;CALM2;TPT1
Busulfan-500 uM in DMSO-Rat-Primary rat hepatocytes-0.67d-up	14/297	1.55597e-07	9.24194e-07	0	0	5.78381	90.667	HSPA8;NQO1;TRAM1;GPX2;NPM1;RPS6;LDHA;TUBA1B;FTH1;CFL1;PGK1;P4HB;SLC38A2;CALM2
Carbimazole-400 mg/kg in Water-Rat-Liver-3d-up	14/297	1.55597e-07	9.23498e-07	0	0	5.78381	90.667	ABCC3;NQO1;GPX2;NPM1;RPL10;RPL23;RPS6;RPS3A;ATP1B1;FADS2;RPS19;TXNIP;P4HB;SLC38A2
Danazol-2000 mg/kg in CMC-Rat-Liver-5d-dn	14/297	1.55597e-07	9.22802e-07	0	0	5.78381	90.667	HSPA8;TRAM1;IGFBP3;RPS6;ATP1B1;EEF2;ICAM1;C3;FADS2;LDHA;H1F0;FTH1;PGK1;TPT1
Gatifloxacin-770 mg/kg in Corn Oil-Rat-Heart-3d-dn	14/297	1.55597e-07	9.22108e-07	0	0	5.78381	90.667	HSPA8;RPL10;RPL23;RPS6;RPS3A;ATP1B1;EEF2;LDHA;RPS19;PGK1;VIM;SLC38A2;CALM2;TPT1
Lomustine-560 uM in DMSO-Rat-Primary rat hepatocytes-1d-dn	14/297	1.55597e-07	9.21415e-07	0	0	5.78381	90.667	TRAM1;GPX2;RPL10;CTGF;C3;LDHA;TUBA1B;RPS19;CFL1;LCN2;RPS20;CALM2;TPT1;TGM2
Nimetazepam-122 mg/kg in CMC-Rat-Liver-3d-dn	14/297	1.55597e-07	9.20722e-07	0	0	5.78381	90.667	TRAM1;NPM1;RPL23;IGFBP3;ICAM1;LDHA;H1F0;FTH1;FASN;TXNIP;RPS20;P4HB;CALM2;TPT1
Norethindrone Acetate-125 mg/kg in Corn Oil-Rat-Liver-3d-up	14/297	1.55597e-07	9.20031e-07	0	0	5.78381	90.667	HSPA8;NPM1;RPL10;RPL23;RPS6;RPS3A;EEF2;VEGFA;RPS19;CFL1;PSMD3;RPS20;CALM2;TGM2
Simvastatin-160 uM in DMSO-Rat-Primary rat hepatocytes-0.67d-up	14/297	1.55597e-07	9.19341e-07	0	0	5.78381	90.667	HSPA8;NPM1;RPL10;RPL23;RPS6;ASNS;LDHA;H1F0;PSAT1;PGK1;TXNIP;P4HB;TPT1;TGM2
Vecuronium Bromide-0.05 mg/kg in Saline-Rat-Liver-5d-up	14/297	1.55597e-07	9.18652e-07	0	0	5.78381	90.667	HSPA8;RPL10;STAT1;RPL23;RPS6;FADS2;LDHA;FASN;CFL1;PGK1;LCN2;RPS20;P4HB;CALM2
Haloperidol-77 uM in DMSO-Rat-Primary rat hepatocytes-1d-up	13/252	1.56323e-07	9.22247e-07	0	0	6.32973	99.1954	HSPA8;NPM1;RPL23;RPS3A;NAP1L1;YBX1;EEF2;TUBA1B;CFL1;LCN2;RPS20;SLC38A2;RAI14
Carbon Tetrachloride-1175 mg/kg in Corn Oil-Rat-Liver-3d-up	15/345	1.57255e-07	9.27049e-07	0	0	5.33476	83.5711	HSPA8;TRAM1;RPL10;RPL23;RPS6;ICAM1;C3;FADS2;LDHA;TUBA1B;RPS19;PLAU;FASN;RPS20;TPT1
123-Trichloropropane-108 mg/kg in CMC-Rat-Kidney-5d-dn	14/298	1.62128e-07	9.55062e-07	0	0	5.7644	90.1257	JUN;IGFBP3;RPS6;ATP1B1;CTGF;LDHA;H1F0;TUBA1B;PSAT1;PGK1;TXNIP;RPS20;CALM2;TGM2
Ampicillin-2000 mg/kg in CMC-Rat-Kidney-1d-up	14/298	1.62128e-07	9.54348e-07	0	0	5.7644	90.1257	HSPA8;GPX2;NPM1;RPL10;RPL23;RPS6;NAP1L1;ATP1B1;EEF2;AKAP12;RPS19;CFL1;LCN2;SPP1
Bromhexine-1200 mg/kg in CMC-Rat-Liver-3d-up	14/298	1.62128e-07	9.53635e-07	0	0	5.7644	90.1257	ABCC3;NQO1;JUN;NPM1;RPL23;RPS6;RPS3A;VEGFA;FADS2;RPS19;PSAT1;FTH1;RPS20;SLC38A2
Cloxacillin-1200 mg/kg in Water-Rat-Kidney-5d-dn	14/298	1.62128e-07	9.52924e-07	0	0	5.7644	90.1257	HSPA8;RPL10;IGFBP3;RPS6;ATP1B1;VEGFA;CFL1;PGK1;SPP1;TXNIP;P4HB;SLC38A2;TPT1;TGM2
Diisopropyl Fluorophosphate-3.75 mg/kg in Water-Rat-Liver-1d-dn	14/298	1.62128e-07	9.52213e-07	0	0	5.7644	90.1257	NQO1;RPL23;RPS6;RPS3A;ICAM1;C3;FADS2;LDHA;RPS19;PLAU;FASN;PGK1;CALM2;RAI14
Ibuprofen-54 mg/kg in Corn Oil-Rat-Liver-0.25d-up	14/298	1.62128e-07	9.51504e-07	0	0	5.7644	90.1257	HSPA8;TRAM1;RPL10;RPL23;RPS6;ATP1B1;EEF2;ICAM1;C3;FADS2;PLAU;FTH1;FASN;LCN2
Cisplatin-1.17 mg/kg in Saline-Rat-Kidney-0.25d-dn	13/253	1.6364e-07	9.59667e-07	0	0	6.30471	98.5149	JUN;RPL10;RPS6;EEF2;H1F0;PSAT1;CFL1;SPP1;TXNIP;VIM;P4HB;TPT1;TGM2
Simvastatin-1200 mg/kg in Corn Oil-Rat-Liver-3d-up	13/253	1.6364e-07	9.58953e-07	0	0	6.30471	98.5149	HSPA8;NPM1;RPL10;RPL23;RPS6;RPS3A;NAP1L1;FADS2;LDHA;FASN;PSMD3;RPS20;RAI14
Bupropion-895 mg/kg in Water-Rat-Liver-5d-dn	14/299	1.68905e-07	9.89066e-07	0	0	5.74512	89.589	HSPA8;RPL23;IGFBP3;ICAM1;VEGFA;FADS2;LDHA;TUBA1B;PLAU;PSMD3;PGK1;TXNIP;P4HB;RAI14
Clobetasol Propionate-17 mg/kg in Corn Oil-Rat-Bone marrow-1d-dn	14/299	1.68905e-07	9.88331e-07	0	0	5.74512	89.589	HSPA8;TRAM1;NPM1;RPL10;RPL23;RPS6;AKAP12;LDHA;RPS19;CFL1;RPS20;VIM;P4HB;CALM2
Clomipramine-115 mg/kg in Water-Rat-Liver-1d-up	14/299	1.68905e-07	9.87597e-07	0	0	5.74512	89.589	HSPA8;TRAM1;NPM1;RPL10;RPL23;RPS6;RPS3A;YBX1;ATP1B1;ICAM1;VEGFA;C3;FTH1;P4HB
Dichlorvos-17 mg/kg in Water-Rat-Liver-1d-dn	14/299	1.68905e-07	9.86865e-07	0	0	5.74512	89.589	NQO1;TRAM1;RPL23;YBX1;ICAM1;VEGFA;C3;LDHA;PLAU;FTH1;PGK1;P4HB;TPT1;RAI14
Etoposide-125 uM in DMSO-Rat-Primary rat hepatocytes-0.67d-up	14/299	1.68905e-07	9.86133e-07	0	0	5.74512	89.589	ITGB1;HSPA8;TRAM1;RPL10;RPL23;ICAM1;CTGF;C3;LDHA;RPS19;FTH1;PGK1;LCN2;P4HB
Leucovorin-1500 mg/kg in CMC-Rat-Bone marrow-3d-up	14/299	1.68905e-07	9.85403e-07	0	0	5.74512	89.589	TRAM1;NPM1;RPL10;RPL23;LDHA;H1F0;TUBA1B;RPS19;FTH1;PGK1;TXNIP;P4HB;SLC38A2;CALM2
Lovastatin-1500 mg/kg in Corn Oil-Rat-Liver-1d-up	14/299	1.68905e-07	9.84673e-07	0	0	5.74512	89.589	HSPA8;RPS3A;EEF2;ICAM1;FADS2;TUBA1B;RPS19;PLAU;FTH1;FASN;CFL1;RPS20;CALM2;TPT1
Loxoprofen-18 mg/kg in Corn Oil-Rat-Kidney-3d-up	14/299	1.68905e-07	9.83945e-07	0	0	5.74512	89.589	ITGB1;HSPA8;RPL10;RPS6;RPS3A;CTGF;VEGFA;LDHA;H1F0;RPS19;PSAT1;PGK1;SPP1;TXNIP
Metoprolol-1200 mg/kg in Water-Rat-Heart-5d-dn	14/299	1.68905e-07	9.83218e-07	0	0	5.74512	89.589	ITGB1;RPL23;TPM1;YBX1;VEGFA;LDHA;RPS19;PGK1;RPS20;P4HB;SLC38A2;CALM2;TPT1;TGM2
Tranilast-300 mg/kg in CMC-Rat-Spleen-5d-up	14/299	1.68905e-07	9.82491e-07	0	0	5.74512	89.589	HSPA8;TRAM1;NPM1;RPL10;RPL23;RPS6;YBX1;RPS19;PGK1;TXNIP;RPS20;P4HB;SLC38A2;CALM2
Trovafloxacin-600 mg/kg in CMC-Rat-Liver-1d-up	14/299	1.68905e-07	9.81766e-07	0	0	5.74512	89.589	HSPA8;JUN;NPM1;RPL10;RPS6;RPS3A;ATP1B1;ICAM1;LDHA;CFL1;PSMD3;SLC38A2;TPT1;TGM2
Dideoxycytidine-1200 mg/kg in CMC-Rat-Liver-5d-dn	15/347	1.69419e-07	9.84027e-07	0	0	5.30401	82.6942	HSPA8;NQO1;TRAM1;RPL10;RPL23;RPS6;YBX1;EEF2;LDHA;TUBA1B;RPS19;PGK1;RPS20;P4HB;TGM2
Amiloride-22 mg/kg in CMC-Rat-Heart-3d-up	13/254	1.71264e-07	9.94013e-07	0	0	6.27989	97.8411	HSPA8;RPL23;TPM1;RPS6;RPS3A;ATP1B1;VEGFA;LDHA;RPS19;TXNIP;CALM2;TPT1;TGM2
Caffeine-93 mg/kg in Water-Rat-Brain-3d-up	13/254	1.71264e-07	9.93281e-07	0	0	6.27989	97.8411	RPL10;RPL23;RPS6;RPS3A;TUBA1B;RPS19;PSAT1;FTH1;PGK1;TXNIP;VIM;CALM2;TPT1
Hexachlorophene-8 mg/kg in Corn Oil-Rat-Liver-1d-up	13/254	1.71264e-07	9.9255e-07	0	0	6.27989	97.8411	JUN;TRAM1;RPL10;RPS6;RPS3A;ATP1B1;C3;RPS19;FTH1;PGK1;RPS20;P4HB;CALM2
Hydroxyurea-59 mg/kg in Saline-Rat-Liver-1d-up	16/398	1.73181e-07	1.00292e-06	0	0	4.93264	76.7959	TRAM1;NPM1;IGFBP3;RPS6;EEF2;VEGFA;C3;LDHA;RPS19;FTH1;CFL1;TXNIP;RPS20;P4HB;TPT1;RAI14
Carboplatin-6 mg/kg in Saline-Rat-Kidney-1d-up	15/348	1.75815e-07	1.01743e-06	0	0	5.28877	82.2606	RPL10;RPS6;PLOD2;ATP1B1;LDHA;H1F0;PLAU;PSAT1;FTH1;PGK1;SPP1;TXNIP;P4HB;CALM2;TGM2
Flutamide-15 mg/kg in Corn Oil-Rat-Kidney-0.25d-up	15/348	1.75815e-07	1.01668e-06	0	0	5.28877	82.2606	HSPA8;RPL10;RPL23;RPS6;RPS3A;LDHA;H1F0;TUBA1B;RPS19;FASN;TXNIP;RPS20;VIM;P4HB;TPT1
Hydrochlorothiazide-1500 mg/kg in CMC-Rat-Kidney-5d-up	15/348	1.75815e-07	1.01593e-06	0	0	5.28877	82.2606	ITGB1;HSPA8;NPM1;RPL10;RPL23;ATP1B1;TUBA1B;FTH1;PSMD3;PGK1;SPP1;P4HB;CALM2;TPT1;TGM2
Amikacin-20 mg/kg in Saline-Rat-Kidney-1d-up	14/300	1.75936e-07	1.01589e-06	0	0	5.72597	89.0569	RPL10;RPS6;YBX1;EEF2;LDHA;H1F0;PLAU;PSAT1;PGK1;SPP1;TXNIP;P4HB;SLC38A2;CALM2
Ciprofloxacin-72 mg/kg in Corn Oil-Rat-Liver-0.25d-up	14/300	1.75936e-07	1.01515e-06	0	0	5.72597	89.0569	HSPA8;NPM1;RPL23;ASNS;RPS3A;ATP1B1;ICAM1;C3;RPS19;PSAT1;FTH1;TXNIP;SLC38A2;TPT1
Harringtonine-23 mg/kg in Saline-Rat-Bone marrow-5d-up	14/300	1.75936e-07	1.0144e-06	0	0	5.72597	89.0569	ITGB1;HSPA8;NPM1;RPL10;RPL23;RPS6;ATP1B1;LDHA;TUBA1B;RPS19;FTH1;CFL1;SPP1;RPS20
Isoeugenol-1560 mg/kg in CMC-Rat-Kidney-5d-dn	14/300	1.75936e-07	1.01366e-06	0	0	5.72597	89.0569	RPL10;RPS6;ATP1B1;EEF2;LDHA;TUBA1B;RPS19;PLAU;PGK1;SPP1;TXNIP;RPS20;P4HB;CALM2
Mifepristone-3 mg/kg in Corn Oil-Rat-Liver-5d-dn	14/300	1.75936e-07	1.01292e-06	0	0	5.72597	89.0569	HSPA8;NQO1;RPL23;RPS6;RPS3A;ATP1B1;C3;LDHA;RPS19;FTH1;FASN;PGK1;TXNIP;P4HB
Modafinil-325 mg/kg in Saline-Rat-Liver-3d-dn	14/300	1.75936e-07	1.01218e-06	0	0	5.72597	89.0569	TRAM1;ATP1B1;EEF2;VEGFA;C3;FADS2;LDHA;FTH1;FASN;PGK1;TXNIP;P4HB;SLC38A2;TPT1
Nitrendipine-10 mg/kg in Corn Oil-Rat-Heart-1d-up	14/300	1.75936e-07	1.01144e-06	0	0	5.72597	89.0569	HSPA8;JUN;ANXA2;IGFBP3;TPM1;RPS3A;CTGF;VEGFA;FTH1;PSMD3;SLC38A2;TPT1;TGM2;RAI14
Penicillamine-852 mg/kg in Water-Rat-Liver-1d-up	14/300	1.75936e-07	1.0107e-06	0	0	5.72597	89.0569	HSPA8;NPM1;RPL23;RPS6;RPS3A;ICAM1;VEGFA;H1F0;RPS19;PSAT1;FTH1;RPS20;CALM2;TPT1
Rifampin-99 mg/kg in CMC-Rat-Liver-5d-dn	14/300	1.75936e-07	1.00997e-06	0	0	5.72597	89.0569	HSPA8;JUN;RPS6;RPS3A;ATP1B1;LDHA;TUBA1B;FTH1;FASN;PGK1;TXNIP;RPS20;SLC38A2;TPT1
Sildenafil-420 mg/kg in Water-Rat-Liver-1d-dn	14/300	1.75936e-07	1.00923e-06	0	0	5.72597	89.0569	TRAM1;NPM1;RPL10;IGFBP3;C3;FADS2;LDHA;H1F0;RPS19;FASN;PGK1;TXNIP;P4HB;RAI14
Spironolactone-300 mg/kg in CMC-Rat-Heart-1d-dn	14/300	1.75936e-07	1.0085e-06	0	0	5.72597	89.0569	RPL10;RPL23;IGFBP3;TPM1;CTGF;VEGFA;LDHA;TUBA1B;CFL1;PSMD3;PGK1;VIM;CALM2;TPT1
Tetracaine-24 mg/kg in Corn Oil-Rat-Heart-5d-up	14/300	1.75936e-07	1.00776e-06	0	0	5.72597	89.0569	ITGB1;ABCC3;JUN;RPL10;TPM1;RPS3A;YBX1;CTGF;FTH1;PGK1;TXNIP;RPS20;VIM;SLC38A2
Atorvastatin-250 uM in DMSO-Rat-Primary rat hepatocytes-1d-up	13/255	1.79205e-07	1.02574e-06	0	0	6.25526	97.1739	ABCC3;HSPA8;TRAM1;RPL10;RPL23;ASNS;NAP1L1;C3;PSAT1;LCN2;RPS20;P4HB;SLC38A2
Acetazolamide-47 mg/kg in Corn Oil-Rat-Liver-1d-up	14/301	1.83231e-07	1.04802e-06	0	0	5.70695	88.5292	NQO1;TRAM1;NPM1;RPL23;IGFBP3;ICAM1;RPS19;PLAU;PSMD3;PGK1;TXNIP;RPS20;CALM2;TPT1
Amikacin-160 mg/kg in Saline-Rat-Kidney-5d-up	14/301	1.83231e-07	1.04726e-06	0	0	5.70695	88.5292	ITGB1;HSPA8;RPL10;IGFBP3;RPS6;RPS3A;YBX1;LDHA;H1F0;SPP1;TXNIP;SLC38A2;CALM2;TPT1
Bupropion-895 mg/kg in Water-Rat-Liver-1d-up	14/301	1.83231e-07	1.0465e-06	0	0	5.70695	88.5292	NQO1;TRAM1;RPL23;RPS6;RPS3A;C3;RPS19;FTH1;LCN2;RPS20;P4HB;SLC38A2;CALM2;TGM2
Ethanol-3000 mg/kg in Saline-Rat-Kidney-0.25d-up	14/301	1.83231e-07	1.04574e-06	0	0	5.70695	88.5292	HSPA8;RPS3A;YBX1;ATP1B1;CTGF;VEGFA;RPS19;FTH1;CFL1;TXNIP;RPS20;SLC38A2;TPT1;RAI14
Norethindrone-375 mg/kg in Corn Oil-Rat-Liver-1d-up	14/301	1.83231e-07	1.04498e-06	0	0	5.70695	88.5292	HSPA8;NPM1;RPL23;RPS6;RPS3A;TUBA1B;RPS19;PLAU;PSAT1;CFL1;PGK1;RPS20;CALM2;RAI14
Pirinixic Acid-364 mg/kg in CMC-Rat-Liver-5d-up	14/301	1.83231e-07	1.04423e-06	0	0	5.70695	88.5292	RPL10;RPL23;RPS6;RPS3A;YBX1;EEF2;FADS2;LDHA;RPS19;FTH1;FASN;TXNIP;CALM2;TPT1
Pravastatin-1200 mg/kg in Corn Oil-Rat-Skeletal muscle-3d-dn	14/301	1.83231e-07	1.04347e-06	0	0	5.70695	88.5292	RPL10;RPL23;TPM1;YBX1;EEF2;LDHA;TUBA1B;CFL1;PGK1;RPS20;VIM;CALM2;TPT1;RAI14
Staurosporine-1.3 uM in DMSO-Rat-Primary rat hepatocytes-0.67d-up	14/301	1.83231e-07	1.04272e-06	0	0	5.70695	88.5292	HSPA8;TRAM1;NPM1;RPL10;RPL23;ASNS;ATP1B1;ICAM1;C3;LDHA;FTH1;PGK1;LCN2;P4HB
Allyl Alcohol-30 uM in DMSO-Rat-Primary rat hepatocytes-0.67d-up	16/400	1.85322e-07	1.05386e-06	0	0	4.90798	76.0794	ITGB1;HSPA8;NQO1;GPX2;NPM1;ANXA2;RPL23;RPS6;RPS3A;CTGF;VEGFA;LDHA;TUBA1B;CFL1;TPT1;TGM2
Troglitazone-100 mg/kg in Corn Oil-Rat-Liver-5d-dn	16/400	1.85322e-07	1.0531e-06	0	0	4.90798	76.0794	HSPA8;NQO1;TRAM1;NPM1;RPL10;RPL23;RPS6;EEF2;VEGFA;RPS19;FTH1;FASN;PGK1;P4HB;SLC38A2;CALM2
Azathioprine-54 mg/kg in Water-Rat-Kidney-5d-dn	13/256	1.87474e-07	1.06456e-06	0	0	6.23083	96.5132	HSPA8;JUN;RPL10;IGFBP3;YBX1;CTGF;H1F0;CFL1;PGK1;SPP1;TXNIP;P4HB;SLC38A2
Rifapentine-75 mg/kg in Corn Oil-Rat-Kidney-5d-dn	13/256	1.87474e-07	1.0638e-06	0	0	6.23083	96.5132	ITGB1;HSPA8;JUN;IGFBP3;ATP1B1;TUBA1B;FTH1;CFL1;SPP1;TXNIP;P4HB;SLC38A2;TPT1
Chlorpromazine-73 mg/kg in Water-Rat-Liver-3d-up	14/302	1.90797e-07	1.08187e-06	0	0	5.68805	88.0059	RPL10;RPL23;RPS6;RPS3A;ATP1B1;EEF2;ICAM1;VEGFA;C3;FADS2;RPS19;FTH1;RPS20;RAI14
Naproxen-10 mg/kg in Corn Oil-Rat-Liver-5d-up	14/302	1.90797e-07	1.08109e-06	0	0	5.68805	88.0059	HSPA8;TRAM1;NPM1;RPL23;RPS6;RPS3A;ATP1B1;ICAM1;RPS19;PSAT1;TXNIP;RPS20;P4HB;SLC38A2
Norethindrone-0.08 mg/kg in Corn Oil-Rat-Liver-1d-up	14/302	1.90797e-07	1.08031e-06	0	0	5.68805	88.0059	HSPA8;NQO1;TRAM1;RPL23;RPS6;ICAM1;VEGFA;C3;RPS19;FTH1;TXNIP;RPS20;CALM2;RAI14
Phenobarbital-54 mg/kg in Water-Rat-Liver-1d-up	14/302	1.90797e-07	1.07954e-06	0	0	5.68805	88.0059	HSPA8;RPL23;RPS6;RPS3A;C3;FADS2;TUBA1B;RPS19;FTH1;FASN;PSMD3;PGK1;RPS20;CALM2
Rosiglitazone-1800 mg/kg in Corn Oil-Rat-Liver-5d-dn	14/302	1.90797e-07	1.07876e-06	0	0	5.68805	88.0059	RPL10;RPS6;RPS3A;ATP1B1;EEF2;VEGFA;C3;FADS2;LDHA;FASN;PGK1;CALM2;TPT1;TGM2
Tobramycin-40 mg/kg in Saline-Rat-Kidney-5d-up	14/302	1.90797e-07	1.07799e-06	0	0	5.68805	88.0059	HSPA8;GPX2;RPL10;RPS6;PLOD2;EEF2;LDHA;PLAU;FTH1;SPP1;TXNIP;P4HB;SLC38A2;TPT1
3-Methylcholanthrene-23 uM in DMSO-Rat-Primary rat hepatocytes-0.67d-up	15/351	1.96337e-07	1.1085e-06	0	0	5.24356	80.9786	ITGB1;HSPA8;NQO1;GPX2;NPM1;RPL23;RPS6;EEF2;CTGF;VEGFA;LDHA;TUBA1B;FTH1;CFL1;TPT1
Loxoprofen-18 mg/kg in Corn Oil-Rat-Kidney-5d-up	15/351	1.96337e-07	1.1077e-06	0	0	5.24356	80.9786	TRAM1;RPL10;RPL23;IGFBP3;RPS6;RPS3A;YBX1;EEF2;CTGF;LDHA;RPS19;CFL1;CALM2;TPT1;TGM2
4-Nonylphenol-200 mg/kg in Corn Oil-Rat-Kidney-3d-up	14/303	1.98643e-07	1.11991e-06	0	0	5.66928	87.4869	ITGB1;TRAM1;RPL10;RPS3A;EEF2;RPS19;CFL1;PGK1;SPP1;RPS20;P4HB;SLC38A2;CALM2;TPT1
Acetaminophen-486 mg/kg in Corn Oil-Rat-Kidney-3d-up	14/303	1.98643e-07	1.11911e-06	0	0	5.66928	87.4869	HSPA8;TRAM1;RPL23;RPS6;YBX1;ATP1B1;VEGFA;TUBA1B;PSAT1;PSMD3;PGK1;SPP1;TXNIP;RPS20
Acrolein-20 mg/kg in Water-Rat-Kidney-3d-dn	14/303	1.98643e-07	1.11831e-06	0	0	5.66928	87.4869	JUN;RPL10;RPL23;RPS6;YBX1;EEF2;CTGF;AKAP12;H1F0;TUBA1B;RPS19;CFL1;PGK1;SPP1
Allyl Alcohol-16 mg/kg in Saline-Rat-Liver-5d-dn	14/303	1.98643e-07	1.11751e-06	0	0	5.66928	87.4869	RPL10;RPL23;RPS6;RPS3A;ATP1B1;EEF2;LDHA;H1F0;TUBA1B;RPS19;FTH1;FASN;PGK1;RPS20
Amitriptyline-20 mg/kg in Water-Rat-Heart-3d-dn	14/303	1.98643e-07	1.11671e-06	0	0	5.66928	87.4869	HSPA8;JUN;RPL23;TPM1;RPS3A;YBX1;CTGF;LDHA;FTH1;PGK1;TXNIP;RPS20;SLC38A2;RAI14
Artemisinin-2000 mg/kg in CMC-Rat-Liver-5d-up	14/303	1.98643e-07	1.11591e-06	0	0	5.66928	87.4869	ABCC3;NQO1;JUN;NPM1;RPL10;RPL23;RPS6;RPS3A;VEGFA;RPS19;FTH1;RPS20;P4HB;TGM2
Carmustine-16 mg/kg in Corn Oil-Rat-Bone marrow-5d-up	14/303	1.98643e-07	1.11512e-06	0	0	5.66928	87.4869	HSPA8;NPM1;RPL10;RPL23;PLOD2;YBX1;CTGF;LDHA;RPS19;FTH1;PGK1;SPP1;RPS20;VIM
Erythromycin-1500 mg/kg in CMC-Rat-Liver-1d-dn	14/303	1.98643e-07	1.11433e-06	0	0	5.66928	87.4869	IGFBP3;RPS6;RPS3A;EEF2;C3;FADS2;LDHA;TUBA1B;RPS19;FASN;PSMD3;PGK1;RPS20;P4HB
Etoposide-188 mg/kg in Corn Oil-Rat-Bone marrow-5d-up	14/303	1.98643e-07	1.11353e-06	0	0	5.66928	87.4869	HSPA8;ANXA2;YBX1;C3;LDHA;FTH1;CFL1;PGK1;LCN2;SPP1;TXNIP;RPS20;VIM;CALM2
Lead (II) Acetate-200 mg/kg in Saline-Rat-Kidney-0.25d-dn	14/303	1.98643e-07	1.11274e-06	0	0	5.66928	87.4869	JUN;TRAM1;RPL10;RPS6;EEF2;LDHA;H1F0;TUBA1B;RPS19;PGK1;SPP1;TXNIP;P4HB;TGM2
Mitomycin C-1.7 mg/kg in Saline-Rat-Liver-5d-up	14/303	1.98643e-07	1.11195e-06	0	0	5.66928	87.4869	HSPA8;NQO1;NPM1;RPL23;RPS3A;ICAM1;VEGFA;RPS19;LCN2;TXNIP;RPS20;SLC38A2;CALM2;TPT1
Tegafur-175 mg/kg in Water-Rat-Bone marrow-5d-dn	14/303	1.98643e-07	1.11116e-06	0	0	5.66928	87.4869	HSPA8;NPM1;RPL10;YBX1;AKAP12;TUBA1B;FTH1;CFL1;LCN2;VIM;P4HB;SLC38A2;CALM2;RAI14
Trichloroethylene-1230 mg/kg in CMC-Rat-Kidney-1d-dn	14/303	1.98643e-07	1.11037e-06	0	0	5.66928	87.4869	HSPA8;TRAM1;RPL10;IGFBP3;RPS6;PLOD2;ATP1B1;EEF2;LDHA;RPS19;FTH1;RPS20;CALM2;TPT1
Vinorelbine-1.5 mg/kg in Saline-Rat-Liver-3d-dn	14/303	1.98643e-07	1.10958e-06	0	0	5.66928	87.4869	TRAM1;RPL10;RPL23;RPS6;EEF2;ICAM1;C3;FADS2;PLAU;FTH1;FASN;CFL1;LCN2;TPT1
Valproic Acid-1500 mg/kg in Water-Rat-Liver-5d-up	15/352	2.03645e-07	1.13672e-06	0	0	5.22867	80.5575	RPL10;STAT1;RPS3A;YBX1;ATP1B1;EEF2;C3;FADS2;FTH1;FASN;CFL1;PGK1;P4HB;TPT1;TGM2
Dexfenfluramine-29 mg/kg in Water-Rat-Kidney-1d-dn	12/215	2.04766e-07	1.14217e-06	0	0	6.84834	105.474	LDHA;H1F0;TUBA1B;RPS19;RPL10;RPL23;RPS6;SPP1;RPS20;RPS3A;VIM;CALM2
Piroxicam-14 mg/kg in CMC-Rat-Kidney-5d-dn	13/258	2.05048e-07	1.14293e-06	0	0	6.18253	95.211	JUN;RPS6;RPS3A;EEF2;CTGF;LDHA;PLAU;PSAT1;CFL1;PSMD3;TXNIP;TPT1;TGM2
Acetaminophen-486 mg/kg in Corn Oil-Rat-Liver-1d-up	14/304	2.06779e-07	1.15176e-06	0	0	5.65063	86.9723	ABCC3;NQO1;TRAM1;NPM1;RPS6;RPS3A;ATP1B1;TUBA1B;RPS19;PSAT1;FTH1;FASN;RPS20;P4HB
Acetaminophen-486 mg/kg in Corn Oil-Rat-Liver-3d-up	14/304	2.06779e-07	1.15095e-06	0	0	5.65063	86.9723	ABCC3;NQO1;TRAM1;NPM1;RPL23;RPS6;RPS3A;RPS19;PLAU;FTH1;FASN;RPS20;P4HB;CALM2
Baclofen-6.6 mg/kg in CMC-Rat-Heart-3d-up	14/304	2.06779e-07	1.15014e-06	0	0	5.65063	86.9723	JUN;RPL10;RPS6;EEF2;VEGFA;LDHA;RPS19;FTH1;CFL1;PGK1;TXNIP;SLC38A2;TPT1;TGM2
Carmofur-201 mg/kg in CMC-Rat-Bone marrow-3d-up	14/304	2.06779e-07	1.14932e-06	0	0	5.65063	86.9723	TRAM1;NPM1;RPL10;RPL23;AKAP12;LDHA;H1F0;FTH1;SPP1;TXNIP;RPS20;VIM;CALM2;TPT1
Colchicine-1000 uM in DMSO-Rat-Primary rat hepatocytes-1d-dn	14/304	2.06779e-07	1.14851e-06	0	0	5.65063	86.9723	NQO1;NPM1;RPL23;RPS6;RPS3A;YBX1;VEGFA;C3;LDHA;RPS19;FTH1;CFL1;LCN2;RPS20
Ifosfamide-143 mg/kg in Saline-Rat-Liver-3d-dn	14/304	2.06779e-07	1.14771e-06	0	0	5.65063	86.9723	RPL10;RPS6;RPS3A;VEGFA;C3;FADS2;LDHA;FASN;PGK1;LCN2;TXNIP;RPS20;P4HB;TPT1
Lead (II) Acetate-2 mg/kg in Saline-Rat-Kidney-28d-up	14/304	2.06779e-07	1.1469e-06	0	0	5.65063	86.9723	NQO1;GPX2;NPM1;RPL10;RPL23;RPS3A;VEGFA;LDHA;RPS19;FTH1;LCN2;RPS20;VIM;CALM2
Nisoldipine-15 mg/kg in Water-Rat-Liver-3d-up	14/304	2.06779e-07	1.14609e-06	0	0	5.65063	86.9723	NQO1;NPM1;RPL10;RPS6;RPS3A;VEGFA;C3;LDHA;RPS19;PLAU;FTH1;CFL1;RPS20;CALM2
Phenytoin-46 mg/kg in Water-Rat-Heart-5d-dn	14/304	2.06779e-07	1.14528e-06	0	0	5.65063	86.9723	RPL10;RPL23;TPM1;RPS6;RPS3A;YBX1;LDHA;RPS19;CFL1;PGK1;RPS20;CALM2;TPT1;TGM2
Pyrogallol-1000 mg/kg in Water-Rat-Liver-5d-up	14/304	2.06779e-07	1.14448e-06	0	0	5.65063	86.9723	NQO1;TRAM1;NPM1;RPL10;RPS6;RPS3A;YBX1;ATP1B1;LDHA;RPS19;FTH1;RPS20;SLC38A2;CALM2
Salicylamide-1300 mg/kg in CMC-Rat-Liver-3d-up	14/304	2.06779e-07	1.14368e-06	0	0	5.65063	86.9723	NQO1;NPM1;RPL10;RPS6;RPS3A;ATP1B1;EEF2;FADS2;LDHA;RPS19;CFL1;P4HB;SLC38A2;CALM2
Ebastine-2 mg/kg in Water-Rat-Heart-3d-up	15/353	2.11199e-07	1.1673e-06	0	0	5.21385	80.1394	ITGB1;HSPA8;RPL23;TPM1;RPS6;YBX1;EEF2;ICAM1;CTGF;VEGFA;RPS19;FTH1;CFL1;TXNIP;RPS20
Isotretinoin-500 uM in DMSO-Rat-Primary rat hepatocytes-1d-up	13/259	2.14378e-07	1.18404e-06	0	0	6.15866	94.5694	HSPA8;NQO1;TRAM1;RPL23;RPS6;ASNS;RPS3A;LDHA;PSAT1;PGK1;RPS20;P4HB;SLC38A2
Buflomedil-615 mg/kg in CMC-Rat-Heart-3d-dn	14/305	2.15215e-07	1.18783e-06	0	0	5.6321	86.462	TRAM1;NPM1;RPL10;ATP1B1;CTGF;LDHA;TUBA1B;FTH1;PGK1;TXNIP;P4HB;SLC38A2;CALM2;TPT1
Chloramphenicol-1500 mg/kg in CMC-Rat-Kidney-5d-dn	14/305	2.15215e-07	1.187e-06	0	0	5.6321	86.462	RPL10;RPS3A;EEF2;CTGF;VEGFA;LDHA;PLAU;PSAT1;FTH1;CFL1;PGK1;RPS20;TPT1;TGM2
Cyproheptadine-37 mg/kg in CMC-Rat-Heart-3d-dn	14/305	2.15215e-07	1.18617e-06	0	0	5.6321	86.462	HSPA8;RPL23;TPM1;RPS6;RPS3A;YBX1;ATP1B1;CTGF;H1F0;TUBA1B;PGK1;RPS20;VIM;SLC38A2
Dexibuprofen-239 mg/kg in CMC-Rat-Kidney-3d-dn	14/305	2.15215e-07	1.18534e-06	0	0	5.6321	86.462	ITGB1;TRAM1;NPM1;RPL23;IGFBP3;RPS6;ATP1B1;CTGF;RPS19;PSAT1;CFL1;PGK1;RPS20;P4HB
Ethacrynic Acid-125 mg/kg in CMC-Rat-Kidney-5d-up	14/305	2.15215e-07	1.18451e-06	0	0	5.6321	86.462	HSPA8;IGFBP3;NAP1L1;YBX1;ATP1B1;VEGFA;RPS19;CFL1;PGK1;SPP1;P4HB;SLC38A2;TPT1;TGM2
Indomethacin-9.6 mg/kg in Water-Rat-Liver-5d-up	14/305	2.15215e-07	1.18368e-06	0	0	5.6321	86.462	HSPA8;TRAM1;NPM1;RPL23;RPS6;RPS3A;C3;PLAU;LCN2;TXNIP;RPS20;VIM;TPT1;TGM2
Interleukin 1 Beta-0.01 mg/kg in RSA/Saline-Rat-Liver-1d-up	14/305	2.15215e-07	1.18285e-06	0	0	5.6321	86.462	HSPA8;JUN;RPL23;RPS6;RPS3A;ATP1B1;ICAM1;FADS2;H1F0;RPS19;LCN2;TXNIP;RPS20;SLC38A2
Leflunomide-30 mg/kg in Corn Oil-Rat-Bone marrow-0.25d-dn	14/305	2.15215e-07	1.18203e-06	0	0	5.6321	86.462	RPL10;RPL23;RPS6;RPS3A;LDHA;H1F0;CFL1;PSMD3;PGK1;TXNIP;VIM;P4HB;CALM2;TPT1
Pioglitazone-1500 mg/kg in Corn Oil-Rat-Heart-1d-up	14/305	2.15215e-07	1.18121e-06	0	0	5.6321	86.462	ITGB1;RPL10;RPL23;TPM1;VEGFA;AKAP12;LDHA;H1F0;TUBA1B;FTH1;P4HB;SLC38A2;TPT1;TGM2
Terbinafine-2000 mg/kg in CMC-Rat-Liver-5d-dn	14/305	2.15215e-07	1.18038e-06	0	0	5.6321	86.462	JUN;TRAM1;NPM1;RPS6;RPS3A;ATP1B1;C3;LDHA;H1F0;RPS19;FASN;PGK1;TXNIP;TPT1
Vinblastine-0.08 mg/kg in Saline-Rat-Bone marrow-0.25d-up	14/305	2.15215e-07	1.17956e-06	0	0	5.6321	86.462	NPM1;RPL23;RPS6;H1F0;TUBA1B;RPS19;FTH1;CFL1;PGK1;TXNIP;RPS20;VIM;SLC38A2;CALM2
Vinorelbine-1.5 mg/kg in Saline-Rat-Heart-3d-dn	14/305	2.15215e-07	1.17874e-06	0	0	5.6321	86.462	HSPA8;RPL10;RPL23;TPM1;RPS6;RPS3A;ATP1B1;LDHA;RPS19;RPS20;VIM;CALM2;TPT1;TGM2
Cadmium Chloride-8 uM in DMSO-Rat-Primary rat hepatocytes-1d-dn	15/354	2.19005e-07	1.19867e-06	0	0	5.19913	79.7243	JUN;TRAM1;NPM1;RPL10;RPL23;RPS6;RPS3A;YBX1;VEGFA;H1F0;RPS19;LCN2;CALM2;TPT1;TGM2
Fluvastatin-5 mg/kg in Corn Oil-Rat-Kidney-3d-dn	15/354	2.19005e-07	1.19784e-06	0	0	5.19913	79.7243	JUN;NPM1;RPL23;IGFBP3;RPS6;LDHA;H1F0;TUBA1B;RPS19;FTH1;SPP1;P4HB;CALM2;TPT1;TGM2
Azaribine-750 mg/kg in CMC-Rat-Heart-5d-dn	14/306	2.23959e-07	1.22408e-06	0	0	5.6137	85.9558	HSPA8;RPL10;TPM1;RPS6;EEF2;CTGF;LDHA;TUBA1B;RPS19;FTH1;PGK1;VIM;CALM2;TPT1
Beta-Estradiol-0.3 mg/kg in Corn Oil-Rat-Liver-5d-dn	14/306	2.23959e-07	1.22323e-06	0	0	5.6137	85.9558	TRAM1;RPL10;RPL23;ATP1B1;ICAM1;VEGFA;C3;FADS2;LDHA;TUBA1B;CFL1;PGK1;SLC38A2;CALM2
Cadmium Chloride-8 uM in DMSO-Rat-Primary rat hepatocytes-0.67d-up	14/306	2.23959e-07	1.22238e-06	0	0	5.6137	85.9558	ITGB1;HSPA8;NQO1;GPX2;NPM1;TXNRD1;ASNS;CTGF;LDHA;TUBA1B;FTH1;PGK1;P4HB;SLC38A2
Carbamazepine-490 mg/kg in CMC-Rat-Liver-3d-up	14/306	2.23959e-07	1.22154e-06	0	0	5.6137	85.9558	ABCC3;HSPA8;NQO1;NPM1;RPL10;RPL23;RPS6;RPS3A;EEF2;RPS19;PSAT1;FTH1;PSMD3;RPS20
Chlorpromazine-73 mg/kg in Water-Rat-Liver-1d-up	14/306	2.23959e-07	1.22069e-06	0	0	5.6137	85.9558	HSPA8;STAT1;RPL23;RPS3A;IFIT2;VEGFA;LDHA;TUBA1B;FTH1;PSMD3;RPS20;CALM2;TPT1;RAI14
Citalopram-40 mg/kg in Corn Oil-Rat-Liver-3d-dn	14/306	2.23959e-07	1.21985e-06	0	0	5.6137	85.9558	HSPA8;RPL23;RPS6;RPS3A;YBX1;EEF2;VEGFA;C3;FADS2;RPS19;FTH1;RPS20;CALM2;TPT1
Clomiphene-250 mg/kg in CMC-Rat-Liver-3d-up	14/306	2.23959e-07	1.21901e-06	0	0	5.6137	85.9558	HSPA8;JUN;RPL10;RPS6;RPS3A;EEF2;VEGFA;RPS19;FTH1;PSMD3;LCN2;RPS20;TPT1;TGM2
Hydroquinone-800 mg/kg in CMC-Rat-Kidney-3d-dn	14/306	2.23959e-07	1.21816e-06	0	0	5.6137	85.9558	JUN;RPL10;IGFBP3;RPS6;EEF2;CTGF;H1F0;PLAU;PSAT1;FTH1;PGK1;TXNIP;RPS20;TGM2
Indomethacin-4.5 mg/kg in Water-Rat-Liver-1d-up	14/306	2.23959e-07	1.21732e-06	0	0	5.6137	85.9558	HSPA8;NPM1;RPL10;RPS3A;YBX1;C3;FADS2;TUBA1B;PLAU;FTH1;RPS20;SLC38A2;TPT1;RAI14
Omeprazole-415 mg/kg in Corn Oil-Rat-Liver-5d-up	14/306	2.23959e-07	1.21648e-06	0	0	5.6137	85.9558	ABCC3;NQO1;NPM1;RPL10;RPL23;ASNS;RPS3A;ICAM1;RPS19;PLAU;PSAT1;RPS20;P4HB;CALM2
Raloxifene-5 mg/kg in Corn Oil-Rat-Liver-3d-up	14/306	2.23959e-07	1.21565e-06	0	0	5.6137	85.9558	HSPA8;RPL10;RPL23;RPS6;YBX1;ICAM1;C3;TUBA1B;RPS19;FTH1;RPS20;CALM2;TPT1;RAI14
Rofecoxib-1550 mg/kg in Corn Oil-Rat-Liver-5d-dn	14/306	2.23959e-07	1.21481e-06	0	0	5.6137	85.9558	HSPA8;RPL10;RPL23;RPS6;RPS3A;ATP1B1;EEF2;FADS2;LDHA;RPS19;FASN;SLC38A2;CALM2;TPT1
Bacitracin-380 mg/kg in Corn Oil-Rat-Kidney-1d-up	14/307	2.33022e-07	1.2631e-06	0	0	5.59541	85.4539	HSPA8;RPL23;RPS6;RPS3A;YBX1;CTGF;LDHA;TUBA1B;FTH1;LCN2;SPP1;TXNIP;VIM;SLC38A2
Carbon Tetrachloride-1175 mg/kg in Corn Oil-Rat-Liver-0.25d-up	14/307	2.33022e-07	1.26223e-06	0	0	5.59541	85.4539	HSPA8;JUN;NPM1;RPL10;RPL23;RPS6;RPS3A;ATP1B1;TUBA1B;RPS19;PLAU;RPS20;TPT1;RAI14
Chloroform-600 mg/kg in Water-Rat-Liver-3d-up	14/307	2.33022e-07	1.26136e-06	0	0	5.59541	85.4539	NQO1;TRAM1;NPM1;RPL10;RPL23;RPS6;ATP1B1;FADS2;H1F0;RPS19;PSMD3;PGK1;P4HB;SLC38A2
Chloroxylenol-1915 mg/kg in Corn Oil-Rat-Liver-5d-up	14/307	2.33022e-07	1.2605e-06	0	0	5.59541	85.4539	HSPA8;NQO1;JUN;TRAM1;NPM1;STAT1;ATP1B1;C3;FASN;PGK1;LCN2;TXNIP;P4HB;SLC38A2
Cobalt (II) Chloride-10 mg/kg in Saline-Rat-Heart-5d-dn	14/307	2.33022e-07	1.25963e-06	0	0	5.59541	85.4539	RPL10;RPL23;TPM1;RPS6;ATP1B1;EEF2;VEGFA;LDHA;TUBA1B;PGK1;VIM;SLC38A2;CALM2;TPT1
Cytarabine-23 mg/kg in Saline-Rat-Liver-5d-dn	14/307	2.33022e-07	1.25877e-06	0	0	5.59541	85.4539	HSPA8;TRAM1;NPM1;RPL23;RPS6;RPS3A;ATP1B1;LDHA;TUBA1B;RPS19;FASN;RPS20;P4HB;CALM2
Furan-24 mg/kg in Corn Oil-Rat-Kidney-5d-dn	14/307	2.33022e-07	1.2579e-06	0	0	5.59541	85.4539	JUN;IGFBP3;RPS3A;LDHA;H1F0;TUBA1B;PLAU;FTH1;CFL1;TXNIP;P4HB;SLC38A2;CALM2;TPT1
Isoeugenol-1560 mg/kg in CMC-Rat-Kidney-1d-dn	14/307	2.33022e-07	1.25704e-06	0	0	5.59541	85.4539	RPL10;RPS6;PLOD2;YBX1;LDHA;H1F0;TUBA1B;RPS19;CFL1;PGK1;SPP1;RPS20;CALM2;TGM2
Ramipril-620 uM in DMSO-Rat-Primary rat hepatocytes-0.67d-up	14/307	2.33022e-07	1.25618e-06	0	0	5.59541	85.4539	ITGB1;HSPA8;ANXA2;RPL10;RPL23;RPS3A;RPS19;FTH1;CFL1;LCN2;RPS20;ITGAV;P4HB;CALM2
Risperidone-400 uM in DMSO-Rat-Primary rat hepatocytes-1d-dn	16/407	2.34156e-07	1.26143e-06	0	0	4.82356	73.6427	HSPA8;TRAM1;RPL10;RPS6;RPS3A;YBX1;ATP1B1;EEF2;TUBA1B;RPS19;FTH1;CFL1;PGK1;CALM2;TPT1;TGM2
Cyclosporin A-8.5 uM in DMSO-Rat-Primary rat hepatocytes-1d-up	13/261	2.34187e-07	1.26073e-06	0	0	6.11146	93.3046	HSPA8;TRAM1;NPM1;RPL10;RPL23;ASNS;RPS3A;NAP1L1;LDHA;PSAT1;RPS20;P4HB;SLC38A2
2378-Tetrachlorodibenzo-P-Dioxin-0.02 mg/kg in CMC-Rat-Liver-5d-dn	14/308	2.42415e-07	1.30414e-06	0	0	5.57724	84.956	HSPA8;RPL10;RPL23;ATP1B1;EEF2;ICAM1;LDHA;FASN;PSMD3;PGK1;P4HB;SLC38A2;TPT1;TGM2
Atorvastatin-300 mg/kg in Corn Oil-Rat-Kidney-5d-up	14/308	2.42415e-07	1.30325e-06	0	0	5.57724	84.956	HSPA8;TRAM1;RPL23;IGFBP3;RPS6;RPS3A;YBX1;LDHA;RPS19;PSMD3;PGK1;RPS20;TPT1;RAI14
Clozapine-95 mg/kg in CMC-Rat-Heart-3d-dn	14/308	2.42415e-07	1.30236e-06	0	0	5.57724	84.956	RPL10;IGFBP3;EEF2;CTGF;LDHA;TUBA1B;CFL1;PSMD3;PGK1;TXNIP;RPS20;SLC38A2;CALM2;TGM2
Digitoxin-2.75 mg/kg in Corn Oil-Rat-Heart-1d-up	14/308	2.42415e-07	1.30147e-06	0	0	5.57724	84.956	HSPA8;JUN;NPM1;RPS6;RPS3A;YBX1;CTGF;TUBA1B;FTH1;PSMD3;VIM;P4HB;TPT1;RAI14
Ethylene Glycol-352 mg/kg in Water-Rat-Bone marrow-3d-dn	14/308	2.42415e-07	1.30058e-06	0	0	5.57724	84.956	HSPA8;RPL10;RPL23;RPS6;RPS3A;LDHA;H1F0;RPS19;CFL1;LCN2;TXNIP;RPS20;CALM2;TPT1
Fenofibrate-43 mg/kg in Corn Oil-Rat-Liver-0.25d-up	14/308	2.42415e-07	1.2997e-06	0	0	5.57724	84.956	HSPA8;IGFBP3;EEF2;FADS2;LDHA;TUBA1B;PLAU;FASN;PSMD3;TXNIP;P4HB;SLC38A2;TPT1;TGM2
Lomustine-8.75 mg/kg in Corn Oil-Rat-Bone marrow-1d-up	14/308	2.42415e-07	1.29881e-06	0	0	5.57724	84.956	HSPA8;NPM1;ASNS;RPS3A;LDHA;H1F0;RPS19;FTH1;PSMD3;LCN2;TXNIP;RPS20;TPT1;RAI14
Methotrexate-0.3 mg/kg in Corn Oil-Rat-Liver-1d-up	14/308	2.42415e-07	1.29793e-06	0	0	5.57724	84.956	NQO1;TRAM1;RPL23;RPS6;RPS3A;ICAM1;RPS19;PLAU;PSAT1;FTH1;TXNIP;RPS20;P4HB;CALM2
NN-Dimethylformamide-1400 mg/kg in Saline-Rat-Bone marrow-1d-dn	14/308	2.42415e-07	1.29705e-06	0	0	5.57724	84.956	TRAM1;NPM1;RPL10;RPL23;RPS6;YBX1;RPS19;FTH1;CFL1;PGK1;RPS20;VIM;CALM2;TPT1
Tranilast-1100 mg/kg in CMC-Rat-Liver-3d-up	14/308	2.42415e-07	1.29617e-06	0	0	5.57724	84.956	HSPA8;NQO1;NPM1;RPL10;RPS6;RPS3A;ATP1B1;LDHA;RPS19;FTH1;CFL1;PSMD3;SLC38A2;TPT1
Chloroxylenol-1915 mg/kg in Corn Oil-Rat-Liver-1d-up	13/262	2.44694e-07	1.30747e-06	0	0	6.08814	92.6813	NQO1;TRAM1;RPL23;VEGFA;C3;PSAT1;FTH1;FASN;CFL1;PGK1;LCN2;RPS20;P4HB
Nimesulide-61.7 uM in DMSO-Rat-Primary rat hepatocytes-1d-up	13/262	2.44694e-07	1.30658e-06	0	0	6.08814	92.6813	NPM1;RPS6;ASNS;RPS3A;CTGF;LOXL2;VEGFA;PSAT1;PGK1;LCN2;VIM;SLC38A2;TGM2
Pyridine-223 mg/kg in Water-Rat-Kidney-3d-dn	12/219	2.4986e-07	1.33326e-06	0	0	6.72325	102.209	H1F0;RPS19;RPL10;PSAT1;FTH1;RPL23;CFL1;RPS6;RPS3A;EEF2;CALM2;VEGFA
Clonazepam-2500 mg/kg in CMC-Rat-Liver-3d-up	14/309	2.52147e-07	1.34455e-06	0	0	5.5592	84.4623	ABCC3;HSPA8;NQO1;JUN;GPX2;NPM1;RPS6;EEF2;CFL1;PSMD3;LCN2;RPS20;P4HB;TPT1
Clotrimazole-89 mg/kg in Corn Oil-Rat-Liver-0.25d-up	14/309	2.52147e-07	1.34364e-06	0	0	5.5592	84.4623	HSPA8;NQO1;RPL10;RPS6;RPS3A;YBX1;ATP1B1;ICAM1;TUBA1B;RPS19;PLAU;FTH1;PSMD3;RPS20
Daunorubicin-3.25 mg/kg in Saline-Rat-Liver-3d-up	14/309	2.52147e-07	1.34274e-06	0	0	5.5592	84.4623	HSPA8;JUN;STAT1;ICAM1;VEGFA;C3;LDHA;TUBA1B;FASN;TXNIP;P4HB;SLC38A2;CALM2;TPT1
Fludrocortisone Acetate-125 mg/kg in CMC-Rat-Heart-1d-dn	14/309	2.52147e-07	1.34183e-06	0	0	5.5592	84.4623	RPL23;RPS6;RPS3A;CTGF;VEGFA;LDHA;RPS19;CFL1;PSMD3;TXNIP;RPS20;VIM;SLC38A2;CALM2
Hexachloro-13-Butadiene-50 mg/kg in Corn Oil-Rat-Kidney-1d-up	14/309	2.52147e-07	1.34092e-06	0	0	5.5592	84.4623	ITGB1;NQO1;JUN;RPL10;RPS3A;CTGF;TUBA1B;FTH1;CFL1;SPP1;TXNIP;SLC38A2;CALM2;TPT1
Leflunomide-30 mg/kg in Corn Oil-Rat-Bone marrow-3d-up	14/309	2.52147e-07	1.34002e-06	0	0	5.5592	84.4623	HSPA8;NPM1;RPL23;RPS3A;NAP1L1;YBX1;LDHA;CFL1;PGK1;LCN2;TXNIP;RPS20;VIM;TPT1
Norfloxacin-1500 mg/kg in CMC-Rat-Kidney-3d-dn	14/309	2.52147e-07	1.33911e-06	0	0	5.5592	84.4623	ITGB1;TRAM1;RPL23;YBX1;ATP1B1;LDHA;RPS19;PLAU;PSAT1;FTH1;PGK1;SPP1;SLC38A2;CALM2
Pramoxine-526 mg/kg in Corn Oil-Rat-Heart-5d-dn	14/309	2.52147e-07	1.33821e-06	0	0	5.5592	84.4623	HSPA8;RPL10;RPL23;TPM1;RPS6;EEF2;CTGF;VEGFA;LDHA;TUBA1B;FTH1;PGK1;VIM;SLC38A2
Rabeprazole-333 uM in DMSO-Rat-Primary rat hepatocytes-0.67d-up	14/309	2.52147e-07	1.33731e-06	0	0	5.5592	84.4623	ITGB1;NPM1;RPL10;RPS6;ASNS;YBX1;CTGF;SLC7A5;LDHA;PSAT1;FTH1;CFL1;LCN2;P4HB
Sodium Arsenite-10 mg/kg in Saline-Rat-Kidney-0.25d-dn	14/309	2.52147e-07	1.33641e-06	0	0	5.5592	84.4623	TRAM1;NPM1;RPL10;RPL23;EEF2;LDHA;H1F0;TUBA1B;RPS19;CFL1;PGK1;P4HB;SLC38A2;TGM2
Trichloroethylene-1230 mg/kg in CMC-Rat-Kidney-5d-up	14/309	2.52147e-07	1.33551e-06	0	0	5.5592	84.4623	ITGB1;HSPA8;NPM1;RPS3A;YBX1;CTGF;FTH1;CFL1;LCN2;SPP1;ITGAV;SLC38A2;TPT1;RAI14
Venlafaxine-320 mg/kg in Water-Rat-Liver-5d-up	14/309	2.52147e-07	1.33461e-06	0	0	5.5592	84.4623	TRAM1;NPM1;RPL10;RPL23;RPS6;YBX1;ATP1B1;ICAM1;RPS19;FTH1;FASN;RPS20;P4HB;SLC38A2
Zomepirac-11 mg/kg in Saline-Rat-Liver-1d-dn	14/309	2.52147e-07	1.33372e-06	0	0	5.5592	84.4623	TRAM1;NPM1;RPL23;RPS6;LDHA;H1F0;TUBA1B;RPS19;FASN;PGK1;TXNIP;P4HB;TPT1;RAI14
Rifampin-125 uM in DMSO-Rat-Primary rat hepatocytes-0.67d-up	15/359	2.62096e-07	1.38541e-06	0	0	5.12672	77.6931	ITGB1;HSPA8;NQO1;NPM1;RPL23;RPS6;ASNS;EEF2;VEGFA;TUBA1B;RPS19;FTH1;RPS20;P4HB;TPT1
Sildenafil-420 mg/kg in Water-Rat-Liver-3d-up	15/359	2.62096e-07	1.38449e-06	0	0	5.12672	77.6931	ABCC3;NQO1;RPL23;RPS6;RPS3A;ATP1B1;ICAM1;FADS2;TUBA1B;RPS19;PLAU;FTH1;FASN;RPS20;P4HB
Auranofin-33 mg/kg in CMC-Rat-Kidney-3d-dn	14/310	2.62229e-07	1.38426e-06	0	0	5.54126	83.9726	HSPA8;NPM1;RPL10;RPS6;ATP1B1;VEGFA;LDHA;H1F0;TUBA1B;RPS19;PLAU;PSAT1;CALM2;TGM2
Bromobenzene-439 mg/kg in CMC-Rat-Kidney-5d-up	14/310	2.62229e-07	1.38333e-06	0	0	5.54126	83.9726	HSPA8;TRAM1;NPM1;RPS6;RPS3A;YBX1;ATP1B1;H1F0;FTH1;CFL1;PGK1;SPP1;P4HB;TPT1
Busulfan-36 mg/kg in Corn Oil-Rat-Liver-1d-up	14/310	2.62229e-07	1.38241e-06	0	0	5.54126	83.9726	TRAM1;NPM1;RPL23;IGFBP3;RPS6;EEF2;ICAM1;FADS2;H1F0;PLAU;FTH1;TXNIP;RPS20;P4HB
Catechol-195 mg/kg in Saline-Rat-Bone marrow-5d-dn	14/310	2.62229e-07	1.38148e-06	0	0	5.54126	83.9726	HSPA8;NPM1;RPL10;RPL23;RPS6;RPS3A;H1F0;TUBA1B;FTH1;PGK1;LCN2;TXNIP;RPS20;RAI14
Chlortetracycline-1500 mg/kg in CMC-Rat-Liver-1d-up	14/310	2.62229e-07	1.38056e-06	0	0	5.54126	83.9726	RPL10;RPS6;RPS3A;EEF2;VEGFA;C3;FADS2;RPS19;FTH1;PSMD3;RPS20;VIM;TPT1;TGM2
Fludrocortisone Acetate-125 mg/kg in CMC-Rat-Liver-5d-dn	14/310	2.62229e-07	1.37964e-06	0	0	5.54126	83.9726	HSPA8;NPM1;RPL23;RPS6;RPS3A;ICAM1;C3;FADS2;TUBA1B;RPS19;FASN;PGK1;TXNIP;TPT1
Hydrocortisone-56 mg/kg in Corn Oil-Rat-Heart-5d-dn	14/310	2.62229e-07	1.37872e-06	0	0	5.54126	83.9726	HSPA8;RPL10;RPL23;TPM1;RPS6;RPS3A;YBX1;EEF2;VEGFA;RPS19;FTH1;VIM;SLC38A2;CALM2
Lead (II) Acetate-2 mg/kg in Saline-Rat-Kidney-5d-up	14/310	2.62229e-07	1.3778e-06	0	0	5.54126	83.9726	HSPA8;TRAM1;GPX2;IGFBP3;RPS6;EEF2;LDHA;PLAU;FTH1;SPP1;TXNIP;P4HB;CALM2;TPT1
Mebendazole-50 mg/kg in Corn Oil-Rat-Liver-0.25d-up	14/310	2.62229e-07	1.37688e-06	0	0	5.54126	83.9726	TRAM1;RPL10;RPL23;IGFBP3;RPS6;YBX1;EEF2;C3;LDHA;RPS19;FASN;CFL1;P4HB;CALM2
Methimazole-100 mg/kg in Water-Rat-Liver-1d-up	14/310	2.62229e-07	1.37596e-06	0	0	5.54126	83.9726	ABCC3;NQO1;NPM1;RPL10;RPL23;RPS3A;TUBA1B;RPS19;PSAT1;FTH1;CFL1;PGK1;RPS20;P4HB
Nateglinide-625 mg/kg in CMC-Rat-Kidney-5d-dn	14/310	2.62229e-07	1.37504e-06	0	0	5.54126	83.9726	JUN;RPL10;RPS6;ATP1B1;LDHA;H1F0;RPS19;PLAU;CFL1;PGK1;SPP1;VIM;CALM2;TPT1
Nystatin-134 mg/kg in Corn Oil-Rat-Kidney-1d-up	14/310	2.62229e-07	1.37413e-06	0	0	5.54126	83.9726	ITGB1;RPL10;RPS6;ATP1B1;EEF2;TUBA1B;RPS19;FTH1;PGK1;LCN2;SPP1;RPS20;P4HB;SLC38A2
Phenothiazine-386 mg/kg in Corn Oil-Rat-Liver-5d-dn	14/310	2.62229e-07	1.37322e-06	0	0	5.54126	83.9726	TRAM1;RPL10;RPL23;RPS6;ATP1B1;ICAM1;VEGFA;LDHA;RPS19;FASN;PGK1;P4HB;SLC38A2;CALM2
Thioguanine-12 mg/kg in Corn Oil-Rat-Liver-5d-up	14/310	2.62229e-07	1.3723e-06	0	0	5.54126	83.9726	HSPA8;NQO1;RPL23;RPS6;RPS3A;ATP1B1;VEGFA;LDHA;PLAU;FASN;LCN2;RPS20;TPT1;TGM2
Zileuton-450 mg/kg in Corn Oil-Rat-Kidney-1d-up	14/310	2.62229e-07	1.37139e-06	0	0	5.54126	83.9726	ITGB1;NQO1;TRAM1;GPX2;RPL23;RPS6;RPS3A;ATP1B1;CTGF;VEGFA;RPS19;PSAT1;PGK1;RPS20
Lead(IV) Acetate-600 mg/kg in Saline-Rat-Liver-5d-dn	13/264	2.66984e-07	1.39534e-06	0	0	6.04202	91.4524	HSPA8;RPS6;RPS3A;YBX1;EEF2;C3;LDHA;RPS19;FTH1;FASN;PSMD3;PGK1;SLC38A2
Benzoic Acid-1700 mg/kg in CMC-Rat-Liver-1d-up	14/311	2.72674e-07	1.42412e-06	0	0	5.52345	83.4868	HSPA8;NPM1;RPL10;RPS6;RPS3A;EEF2;VEGFA;RPS19;FTH1;FASN;PGK1;P4HB;CALM2;TPT1
Gallamine Triethiodide-2.5 mg/kg in Saline-Rat-Heart-1d-dn	14/311	2.72674e-07	1.42318e-06	0	0	5.52345	83.4868	ITGB1;NPM1;RPL10;TPM1;RPS3A;YBX1;ICAM1;VEGFA;FTH1;RPS20;P4HB;SLC38A2;CALM2;TPT1
Lead (II) Acetate-200 mg/kg in Saline-Rat-Kidney-3d-dn	14/311	2.72674e-07	1.42224e-06	0	0	5.52345	83.4868	JUN;RPL10;RPS6;PLOD2;EEF2;LDHA;H1F0;RPS19;PLAU;PGK1;TXNIP;SLC38A2;CALM2;RAI14
Nadolol-1500 mg/kg in CMC-Rat-Heart-3d-up	14/311	2.72674e-07	1.42129e-06	0	0	5.52345	83.4868	NPM1;IGFBP3;TPM1;RPS6;RPS3A;EEF2;CTGF;H1F0;TUBA1B;FTH1;CFL1;PSMD3;LCN2;TGM2
Clobetasol Propionate-17 mg/kg in Corn Oil-Rat-Bone marrow-5d-dn	13/265	2.78798e-07	1.45226e-06	0	0	6.01922	90.8467	HSPA8;NPM1;RPL10;RPL23;RPS6;AKAP12;H1F0;TUBA1B;RPS19;FTH1;CFL1;P4HB;CALM2
Valacyclovir-88 mg/kg in CMC-Rat-Kidney-5d-dn	13/265	2.78798e-07	1.4513e-06	0	0	6.01922	90.8467	JUN;RPL10;RPS3A;YBX1;EEF2;CTGF;LDHA;H1F0;PLAU;FTH1;PGK1;SPP1;TXNIP
Netilmicin-41 mg/kg in Saline-Rat-Kidney-5d-up	15/361	2.81379e-07	1.46377e-06	0	0	5.09831	76.9007	HSPA8;RPL10;STAT1;RPS6;PLOD2;NAP1L1;CTGF;RPS19;PSAT1;FTH1;PSMD3;SPP1;TXNIP;TPT1;TGM2
Acyclovir-980 mg/kg in Saline-Rat-Liver-3d-dn	14/312	2.83491e-07	1.47378e-06	0	0	5.50574	83.005	TRAM1;RPL10;ATP1B1;C3;FADS2;H1F0;FASN;PGK1;LCN2;TXNIP;P4HB;TPT1;TGM2;RAI14
Candesartan-1300 mg/kg in CMC-Rat-Kidney-3d-dn	14/312	2.83491e-07	1.47281e-06	0	0	5.50574	83.005	ITGB1;RPL10;RPS6;LDHA;H1F0;TUBA1B;RPS19;PLAU;PSAT1;CFL1;PGK1;SPP1;P4HB;CALM2
Captopril-1750 mg/kg in Water-Rat-Kidney-3d-up	14/312	2.83491e-07	1.47184e-06	0	0	5.50574	83.005	JUN;GPX2;RPS3A;ATP1B1;CTGF;VEGFA;C3;LDHA;TUBA1B;FTH1;LCN2;TXNIP;RPS20;TPT1
Diazepam-710 mg/kg in CMC-Rat-Kidney-1d-dn	14/312	2.83491e-07	1.47087e-06	0	0	5.50574	83.005	ITGB1;RPL10;RPS6;YBX1;CTGF;H1F0;RPS19;CFL1;PGK1;TXNIP;RPS20;CALM2;TPT1;TGM2
Hydrocortisone-56 mg/kg in Corn Oil-Rat-Bone marrow-1d-dn	14/312	2.83491e-07	1.4699e-06	0	0	5.50574	83.005	NPM1;RPL10;RPS6;RPS3A;YBX1;AKAP12;FTH1;CFL1;LCN2;RPS20;VIM;SLC38A2;CALM2;TPT1
N-Nitrosodiethylamine-1.67 mg/kg in Saline-Rat-Kidney-1d-dn	14/312	2.83491e-07	1.46893e-06	0	0	5.50574	83.005	ITGB1;RPL10;YBX1;EEF2;VEGFA;H1F0;RPS19;PSAT1;CFL1;PGK1;SPP1;TXNIP;TPT1;TGM2
Nortriptyline-70 uM in DMSO-Rat-Primary rat hepatocytes-0.67d-up	14/312	2.83491e-07	1.46797e-06	0	0	5.50574	83.005	HSPA8;TRAM1;NPM1;RPL10;RPL23;ASNS;ICAM1;VEGFA;C3;LDHA;FTH1;PGK1;LCN2;P4HB
Ouabain-144 mg/kg in CMC-Rat-Heart-5d-up	14/312	2.83491e-07	1.467e-06	0	0	5.50574	83.005	HSPA8;JUN;NPM1;RPL10;IGFBP3;TPM1;YBX1;CTGF;VEGFA;H1F0;PGK1;TXNIP;P4HB;SLC38A2
Sparfloxacin-29 mg/kg in Corn Oil-Rat-Liver-3d-dn	14/312	2.83491e-07	1.46604e-06	0	0	5.50574	83.005	HSPA8;JUN;RPS6;RPS3A;YBX1;EEF2;VEGFA;C3;FADS2;RPS19;FTH1;FASN;CALM2;TPT1
Bezafibrate-100 mg/kg in Corn Oil-Rat-Kidney-0.25d-dn	13/266	2.91078e-07	1.50429e-06	0	0	5.99659	90.2467	ITGB1;RPL10;RPS6;YBX1;ATP1B1;CTGF;VEGFA;PSAT1;FTH1;PGK1;SPP1;SLC38A2;TPT1
Albendazole-62 mg/kg in Corn Oil-Rat-Liver-3d-up	14/313	2.94693e-07	1.52197e-06	0	0	5.48815	82.5271	HSPA8;NQO1;RPL10;RPS3A;YBX1;ATP1B1;ICAM1;C3;CFL1;PGK1;LCN2;P4HB;SLC38A2;TPT1
Albendazole-62 mg/kg in Corn Oil-Rat-Liver-5d-up	14/313	2.94693e-07	1.52097e-06	0	0	5.48815	82.5271	HSPA8;NQO1;NPM1;RPL10;RPL23;RPS3A;ATP1B1;ICAM1;LCN2;RPS20;SLC38A2;CALM2;TPT1;RAI14
Econazole-334 mg/kg in Corn Oil-Rat-Liver-3d-dn	14/313	2.94693e-07	1.51998e-06	0	0	5.48815	82.5271	TRAM1;RPL23;IGFBP3;ICAM1;VEGFA;C3;FADS2;LDHA;H1F0;TUBA1B;RPS19;FASN;PGK1;TGM2
Epirubicin-2.7 mg/kg in Saline-Rat-Heart-1d-dn	14/313	2.94693e-07	1.51898e-06	0	0	5.48815	82.5271	TRAM1;RPL10;TPM1;RPS3A;ATP1B1;EEF2;ICAM1;TUBA1B;CFL1;PGK1;TXNIP;RPS20;VIM;TPT1
Epirubicin-2.7 mg/kg in Saline-Rat-Liver-3d-dn	14/313	2.94693e-07	1.51799e-06	0	0	5.48815	82.5271	TRAM1;RPL10;RPL23;RPS6;ICAM1;C3;FADS2;LDHA;RPS19;PLAU;FTH1;FASN;RPS20;RAI14
Flavoxate-1255 mg/kg in CMC-Rat-Heart-1d-dn	14/313	2.94693e-07	1.517e-06	0	0	5.48815	82.5271	ITGB1;NPM1;RPL10;RPS6;RPS3A;YBX1;CTGF;LDHA;RPS19;CFL1;VIM;CALM2;TPT1;TGM2
Ifosfamide-17 mg/kg in Saline-Rat-Liver-5d-dn	14/313	2.94693e-07	1.51601e-06	0	0	5.48815	82.5271	TRAM1;RPL10;IGFBP3;YBX1;EEF2;C3;LDHA;RPS19;FASN;CFL1;PGK1;P4HB;SLC38A2;TPT1
Pemoline-833 uM in DMSO-Rat-Primary rat hepatocytes-1d-dn	14/313	2.94693e-07	1.51502e-06	0	0	5.48815	82.5271	ITGB1;HSPA8;NPM1;ANXA2;RPL10;VEGFA;C3;RPS19;FTH1;PGK1;RPS20;P4HB;SLC38A2;TPT1
Thiabendazole-92 mg/kg in Corn Oil-Rat-Liver-3d-up	14/313	2.94693e-07	1.51403e-06	0	0	5.48815	82.5271	NQO1;NPM1;RPL23;RPS6;ASNS;RPS3A;YBX1;EEF2;VEGFA;RPS19;PSAT1;PSMD3;RPS20;CALM2
Zileuton-450 mg/kg in Corn Oil-Rat-Liver-5d-dn	14/313	2.94693e-07	1.51304e-06	0	0	5.48815	82.5271	HSPA8;NPM1;RPL10;RPS6;RPS3A;ATP1B1;EEF2;FADS2;LDHA;H1F0;PLAU;FTH1;SLC38A2;TPT1
Leflunomide-60 mg/kg in Corn Oil-Rat-Spleen-3d-up	13/267	3.03841e-07	1.55899e-06	0	0	5.97413	89.6523	RPL10;RPL23;RPS6;RPS3A;NAP1L1;YBX1;EEF2;VEGFA;FTH1;CFL1;PGK1;TXNIP;RPS20
Thiamphenicol-1500 mg/kg in Water-Rat-Kidney-5d-dn	13/267	3.03841e-07	1.55798e-06	0	0	5.97413	89.6523	TRAM1;NPM1;RPL10;VEGFA;CFL1;PGK1;SPP1;TXNIP;RPS20;P4HB;SLC38A2;CALM2;TPT1
Altretamine-40 mg/kg in Corn Oil-Rat-Bone marrow-3d-dn	14/314	3.06293e-07	1.56953e-06	0	0	5.47067	82.0531	NPM1;RPL10;RPL23;RPS6;RPS3A;EEF2;TUBA1B;RPS19;FTH1;CFL1;PGK1;LCN2;P4HB;TPT1
Amantadine-220 mg/kg in Water-Rat-Liver-1d-up	14/314	3.06293e-07	1.56851e-06	0	0	5.47067	82.0531	NPM1;RPL10;RPL23;RPS6;RPS3A;C3;FADS2;LDHA;RPS19;FTH1;FASN;RPS20;CALM2;TPT1
Amiodarone-147 mg/kg in CMC-Rat-Liver-3d-up	14/314	3.06293e-07	1.56749e-06	0	0	5.47067	82.0531	NQO1;TRAM1;NPM1;RPL10;STAT1;RPS3A;ATP1B1;EEF2;CFL1;PSMD3;PGK1;TXNIP;P4HB;TGM2
Azathioprine-54 mg/kg in Water-Rat-Bone marrow-3d-up	14/314	3.06293e-07	1.56647e-06	0	0	5.47067	82.0531	HSPA8;NPM1;RPL10;RPS3A;YBX1;LDHA;CFL1;PGK1;LCN2;SPP1;RPS20;VIM;P4HB;CALM2
Benzothiazyl Disulfide-2600 mg/kg in Corn Oil-Rat-Liver-1d-up	14/314	3.06293e-07	1.56545e-06	0	0	5.47067	82.0531	HSPA8;NQO1;RPL10;RPS6;ATP1B1;EEF2;C3;FADS2;LDHA;RPS19;FASN;PSMD3;LCN2;TPT1
Carmustine-4 mg/kg in Corn Oil-Rat-Liver-1d-up	14/314	3.06293e-07	1.56444e-06	0	0	5.47067	82.0531	HSPA8;NQO1;TRAM1;RPL23;ICAM1;TUBA1B;RPS19;PLAU;PSAT1;LCN2;TXNIP;RPS20;CALM2;TPT1
Chlorambucil-0.6 mg/kg in Corn Oil-Rat-Spleen-0.25d-up	14/314	3.06293e-07	1.56342e-06	0	0	5.47067	82.0531	HSPA8;NPM1;RPL10;IGFBP3;RPS6;RPS3A;YBX1;EEF2;LDHA;CFL1;TXNIP;VIM;CALM2;TPT1
Disulfiram-500 mg/kg in Water-Rat-Liver-3d-up	14/314	3.06293e-07	1.56241e-06	0	0	5.47067	82.0531	ABCC3;NQO1;JUN;NPM1;RPS6;RPS3A;YBX1;FADS2;RPS19;FTH1;PGK1;RPS20;P4HB;SLC38A2
Ergocalciferol-15 mg/kg in CMC-Rat-Heart-1d-dn	14/314	3.06293e-07	1.5614e-06	0	0	5.47067	82.0531	HSPA8;RPL10;RPL23;TPM1;RPS6;ATP1B1;CTGF;VEGFA;LDHA;PGK1;RPS20;SLC38A2;CALM2;TGM2
NN'-Diphenyl-P-Phenylenediamine-1000 mg/kg in CMC-Rat-Liver-3d-up	14/314	3.06293e-07	1.56039e-06	0	0	5.47067	82.0531	JUN;RPL10;RPS6;RPS3A;ATP1B1;C3;FADS2;H1F0;RPS19;FASN;PSMD3;PGK1;RPS20;SLC38A2
Ondansetron-84 mg/kg in Water-Rat-Intestine-1d-dn	14/314	3.06293e-07	1.55938e-06	0	0	5.47067	82.0531	NQO1;GPX2;RPL10;RPS6;RPS3A;YBX1;EEF2;LDHA;TUBA1B;FTH1;CFL1;PGK1;P4HB;TPT1
Aspirin-35 mg/kg in Corn Oil-Rat-Liver-5d-dn	15/364	3.12716e-07	1.59106e-06	0	0	5.05629	75.733	HSPA8;RPL10;RPS6;RPS3A;YBX1;EEF2;VEGFA;FADS2;LDHA;RPS19;FASN;PGK1;CALM2;TPT1;TGM2
Pentamidine-18 mg/kg in Saline-Rat-Bone marrow-3d-dn	16/416	3.14034e-07	1.59673e-06	0	0	4.71921	70.6643	HSPA8;NPM1;RPL10;RPL23;NAP1L1;EEF2;LDHA;TUBA1B;RPS19;FTH1;CFL1;PGK1;LCN2;TXNIP;RPS20;CALM2
Dexamethasone-1 mg/kg in Corn Oil-Rat-Heart-3d-dn	13/268	3.17102e-07	1.61129e-06	0	0	5.95184	89.0635	RPS6;RPS3A;ATP1B1;EEF2;VEGFA;LDHA;TUBA1B;RPS19;CFL1;VIM;P4HB;SLC38A2;TPT1
2-Acetylaminofluorene-30 mg/kg in CMC-Rat-Kidney-5d-dn	14/315	3.18301e-07	1.61634e-06	0	0	5.45331	81.5829	HSPA8;RPL10;RPL23;RPS6;RPS3A;ATP1B1;EEF2;LDHA;PLAU;PSAT1;PGK1;SPP1;CALM2;TPT1
Phenobarbital-80 mg/kg in Water-Rat-Liver-1d-up	14/315	3.18301e-07	1.6153e-06	0	0	5.45331	81.5829	NQO1;TRAM1;NPM1;RPL10;RPS6;RPS3A;YBX1;ICAM1;LDHA;TUBA1B;FTH1;PGK1;P4HB;CALM2
Rofecoxib-3 mg/kg in Corn Oil-Rat-Liver-5d-dn	14/315	3.18301e-07	1.61426e-06	0	0	5.45331	81.5829	RPS6;RPS3A;ATP1B1;ICAM1;VEGFA;C3;LDHA;TUBA1B;FTH1;FASN;PGK1;SLC38A2;TGM2;RAI14
Thalidomide-113 mg/kg in CMC-Rat-Kidney-1d-dn	14/315	3.18301e-07	1.61322e-06	0	0	5.45331	81.5829	TRAM1;RPL10;RPL23;CTGF;LDHA;TUBA1B;PLAU;PSAT1;PGK1;SPP1;SLC38A2;CALM2;TPT1;TGM2
Propranolol-175 mg/kg in Water-Rat-Heart-1d-up	15/365	3.23843e-07	1.64025e-06	0	0	5.04244	75.3492	ITGB1;TPM1;RPS6;RPS3A;YBX1;ATP1B1;LDHA;TUBA1B;RPS19;CFL1;PGK1;TXNIP;RPS20;VIM;TPT1
Zidovudine-1540 mg/kg in Corn Oil-Rat-Heart-3d-up	15/365	3.23843e-07	1.63919e-06	0	0	5.04244	75.3492	ITGB1;RPL10;RPL23;TPM1;RPS6;YBX1;CTGF;LDHA;PGK1;TXNIP;RPS20;SLC38A2;CALM2;TPT1;TGM2
4-Chloro-2-Nitroaniline-1200 mg/kg in CMC-Rat-Kidney-3d-up	14/316	3.30732e-07	1.67299e-06	0	0	5.43605	81.1165	HSPA8;NQO1;GPX2;NPM1;RPL23;IGFBP3;RPS3A;ATP1B1;CTGF;PLAU;LCN2;SPP1;TXNIP;RPS20
6-Mercaptopurine-25 mg/kg in Corn Oil-Rat-Kidney-3d-dn	14/316	3.30732e-07	1.67192e-06	0	0	5.43605	81.1165	HSPA8;RPL10;RPL23;RPS6;RPS3A;ATP1B1;LDHA;RPS19;PSAT1;PGK1;RPS20;CALM2;TPT1;TGM2
Beta-Naphthoflavone-80 mg/kg in CMC-Rat-Liver-91d-dn	14/316	3.30732e-07	1.67084e-06	0	0	5.43605	81.1165	HSPA8;TRAM1;NPM1;RPL10;RPL23;IGFBP3;RPS6;RPS3A;ATP1B1;VEGFA;RPS19;PGK1;RPS20;SLC38A2
Carboplatin-6 mg/kg in Saline-Rat-Liver-3d-dn	14/316	3.30732e-07	1.66977e-06	0	0	5.43605	81.1165	JUN;RPL23;RPS3A;YBX1;VEGFA;C3;FADS2;PLAU;FTH1;FASN;LCN2;TXNIP;P4HB;TPT1
Daunorubicin-3.25 mg/kg in Saline-Rat-Kidney-3d-up	14/316	3.30732e-07	1.6687e-06	0	0	5.43605	81.1165	HSPA8;JUN;RPL10;RPL23;YBX1;ATP1B1;EEF2;LDHA;PLAU;PGK1;SPP1;TXNIP;P4HB;SLC38A2
Doxycycline-14 mg/kg in Water-Rat-Liver-0.25d-dn	14/316	3.30732e-07	1.66764e-06	0	0	5.43605	81.1165	NQO1;RPL23;RPS3A;EEF2;ICAM1;VEGFA;C3;FADS2;TUBA1B;RPS19;FTH1;CFL1;RPS20;TPT1
Gemfibrozil-100 mg/kg in Corn Oil-Rat-Liver-3d-up	14/316	3.30732e-07	1.66657e-06	0	0	5.43605	81.1165	HSPA8;NQO1;TRAM1;NPM1;STAT1;RPL23;RPS6;FADS2;LDHA;RPS19;FASN;TXNIP;RPS20;CALM2
Ifosfamide-11000 uM in DMSO-Rat-Primary rat hepatocytes-0.67d-up	14/316	3.30732e-07	1.6655e-06	0	0	5.43605	81.1165	ITGB1;HSPA8;NPM1;RPL10;RPL23;ASNS;VEGFA;C3;LDHA;FTH1;PGK1;LCN2;P4HB;SLC38A2
Primaquine-45 mg/kg in CMC-Rat-Liver-3d-up	14/316	3.30732e-07	1.66444e-06	0	0	5.43605	81.1165	NQO1;RPL10;RPL23;RPS6;RPS3A;EEF2;C3;FADS2;RPS19;FTH1;CFL1;LCN2;RPS20;TPT1
Roxithromycin-312 mg/kg in CMC-Rat-Liver-5d-dn	14/316	3.30732e-07	1.66338e-06	0	0	5.43605	81.1165	JUN;TRAM1;RPL23;RPS6;ATP1B1;ICAM1;FADS2;LDHA;RPS19;FTH1;FASN;PGK1;RPS20;P4HB
Thioridazine-63 mg/kg in Corn Oil-Rat-Heart-3d-dn	14/316	3.30732e-07	1.66231e-06	0	0	5.43605	81.1165	HSPA8;RPL23;RPS6;RPS3A;ATP1B1;RPS19;FTH1;CFL1;PGK1;TXNIP;VIM;P4HB;CALM2;TPT1
Acyclovir-980 mg/kg in Saline-Rat-Bone marrow-3d-dn	13/269	3.3088e-07	1.662e-06	0	0	5.92971	88.4802	HSPA8;NPM1;RPL10;RPL23;RPS6;ASNS;ATP1B1;H1F0;RPS19;FTH1;PGK1;LCN2;RPS20
Diclofenac-3.5 mg/kg in Corn Oil-Rat-Liver-5d-dn	13/269	3.3088e-07	1.66094e-06	0	0	5.92971	88.4802	HSPA8;NQO1;RPL10;RPS3A;YBX1;ATP1B1;VEGFA;C3;LDHA;RPS19;FTH1;RPS20;TPT1
Zomepirac-11 mg/kg in Saline-Rat-Kidney-1d-dn	13/269	3.3088e-07	1.65988e-06	0	0	5.92971	88.4802	RPL23;RPS6;YBX1;EEF2;VEGFA;PSAT1;FTH1;CFL1;TXNIP;VIM;SLC38A2;TPT1;TGM2
Ethylene Glycol-352 mg/kg in Water-Rat-Liver-5d-dn	14/317	3.43598e-07	1.72258e-06	0	0	5.4189	80.6538	HSPA8;TRAM1;RPL10;RPS6;RPS3A;VEGFA;C3;FADS2;LDHA;FASN;PSMD3;PGK1;P4HB;RAI14
Foscarnet-350 mg/kg in Saline-Rat-Kidney-5d-dn	14/317	3.43598e-07	1.72149e-06	0	0	5.4189	80.6538	HSPA8;RPL10;RPS6;RPS3A;CTGF;LDHA;H1F0;RPS19;PGK1;SPP1;TXNIP;RPS20;VIM;TGM2
Netilmicin-41 mg/kg in Saline-Rat-Kidney-3d-up	14/317	3.43598e-07	1.72039e-06	0	0	5.4189	80.6538	HSPA8;JUN;RPL10;YBX1;ATP1B1;CTGF;H1F0;TUBA1B;RPS19;FTH1;PGK1;TXNIP;RPS20;TPT1
Paroxetine-30 uM in DMSO-Rat-Primary rat hepatocytes-1d-dn	14/317	3.43598e-07	1.7193e-06	0	0	5.4189	80.6538	HSPA8;TRAM1;NPM1;RPL23;RPS6;VEGFA;C3;LDHA;RPS19;FTH1;CFL1;LCN2;RPS20;TPT1
Cromolyn-1500 mg/kg in Water-Rat-Kidney-5d-dn	13/270	3.45191e-07	1.72617e-06	0	0	5.90775	87.9024	HSPA8;JUN;NPM1;RPL23;RPS3A;ATP1B1;VEGFA;RPS19;PSAT1;TXNIP;RPS20;P4HB;TPT1
Sodium Orthovanadate-83 mg/kg in CMC-Rat-Kidney-1d-up	13/270	3.45191e-07	1.72508e-06	0	0	5.90775	87.9024	HSPA8;RPL10;RPL23;IGFBP3;RPS3A;ATP1B1;CTGF;FTH1;CFL1;PGK1;VIM;SLC38A2;TPT1
Aldosterone-0.065 mg/kg in Saline-Rat-Kidney-3d-dn	14/318	3.56913e-07	1.78253e-06	0	0	5.40186	80.1948	HSPA8;GPX2;NPM1;RPL10;RPL23;RPS6;RPS3A;YBX1;ATP1B1;H1F0;PLAU;RPS20;TPT1;TGM2
Carmustine-4 mg/kg in Corn Oil-Rat-Spleen-0.25d-up	14/318	3.56913e-07	1.7814e-06	0	0	5.40186	80.1948	HSPA8;RPL10;RPL23;RPS6;RPS3A;NAP1L1;YBX1;ATP1B1;FTH1;PGK1;TXNIP;RPS20;VIM;RAI14
DActinomycin-0.06 mg/kg in Saline-Rat-Bone marrow-1d-up	14/318	3.56913e-07	1.78027e-06	0	0	5.40186	80.1948	TRAM1;NPM1;RPL10;RPS6;RPS3A;YBX1;LDHA;H1F0;RPS19;CFL1;TXNIP;VIM;P4HB;CALM2
Lorazepam-2000 mg/kg in CMC-Rat-Liver-5d-up	14/318	3.56913e-07	1.77914e-06	0	0	5.40186	80.1948	ABCC3;HSPA8;NQO1;GPX2;NPM1;RPL10;RPL23;EEF2;VEGFA;TUBA1B;RPS19;FTH1;RPS20;P4HB
Methapyrilene-100 mg/kg in CMC-Rat-Liver-3d-up	14/318	3.56913e-07	1.77802e-06	0	0	5.40186	80.1948	ABCC3;NQO1;NPM1;RPL10;RPL23;RPS6;RPS3A;LDHA;RPS19;FTH1;CFL1;RPS20;P4HB;CALM2
Naproxen-10 mg/kg in Corn Oil-Rat-Liver-1d-up	14/318	3.56913e-07	1.77689e-06	0	0	5.40186	80.1948	HSPA8;NQO1;TRAM1;NPM1;RPL10;RPL23;RPS6;ASNS;RPS3A;ICAM1;RPS19;PLAU;TPT1;RAI14
Hydrochlorothiazide-1500 mg/kg in CMC-Rat-Kidney-1d-dn	13/271	3.60054e-07	1.7914e-06	0	0	5.88595	87.3299	RPL23;IGFBP3;RPS6;RPS3A;YBX1;VEGFA;H1F0;PLAU;PSAT1;CFL1;SPP1;CALM2;TGM2
Amitraz-75 mg/kg in CMC-Rat-Heart-1d-dn	14/319	3.7069e-07	1.84315e-06	0	0	5.38493	79.7394	RPL10;RPL23;TPM1;RPS3A;EEF2;LDHA;TUBA1B;RPS19;CFL1;PGK1;RPS20;VIM;P4HB;CALM2
Cytarabine-487 mg/kg in Saline-Rat-Kidney-5d-dn	14/319	3.7069e-07	1.84199e-06	0	0	5.38493	79.7394	ITGB1;HSPA8;GPX2;RPL10;RPL23;ATP1B1;EEF2;CTGF;TUBA1B;FTH1;CFL1;TXNIP;TGM2;RAI14
Ferrocene-330 mg/kg in CMC-Rat-Kidney-5d-dn	14/319	3.7069e-07	1.84083e-06	0	0	5.38493	79.7394	JUN;RPL10;RPS6;ATP1B1;EEF2;CTGF;LDHA;H1F0;RPS19;PLAU;PSAT1;SPP1;CALM2;TGM2
Glycine-2000 mg/kg in CMC-Rat-Kidney-5d-dn	14/319	3.7069e-07	1.83967e-06	0	0	5.38493	79.7394	RPL10;RPS6;RPS3A;EEF2;CTGF;LDHA;RPS19;PSAT1;FTH1;CFL1;PGK1;SPP1;TXNIP;TGM2
Letrozole-250 mg/kg in Corn Oil-Rat-Liver-5d-up	14/319	3.7069e-07	1.83851e-06	0	0	5.38493	79.7394	HSPA8;NPM1;RPL10;RPL23;RPS6;RPS3A;ICAM1;CFL1;PSMD3;PGK1;RPS20;P4HB;SLC38A2;TPT1
Pemoline-70 mg/kg in CMC-Rat-Liver-5d-up	14/319	3.7069e-07	1.83735e-06	0	0	5.38493	79.7394	TRAM1;NPM1;RPL10;RPS6;ATP1B1;FADS2;LDHA;RPS19;FASN;TXNIP;RPS20;P4HB;SLC38A2;CALM2
Penicillamine-852 mg/kg in Water-Rat-Bone marrow-3d-up	14/319	3.7069e-07	1.8362e-06	0	0	5.38493	79.7394	HSPA8;RPL10;ASNS;RPS3A;YBX1;LDHA;RPS19;FTH1;CFL1;PGK1;LCN2;VIM;P4HB;CALM2
Pentobarbital-70 mg/kg in Water-Rat-Liver-3d-up	14/319	3.7069e-07	1.83504e-06	0	0	5.38493	79.7394	TRAM1;NPM1;RPL10;RPL23;RPS3A;EEF2;VEGFA;FADS2;RPS19;FTH1;CFL1;PGK1;CALM2;RAI14
Phenacetin-619 mg/kg in Corn Oil-Rat-Kidney-3d-dn	14/319	3.7069e-07	1.83389e-06	0	0	5.38493	79.7394	HSPA8;TRAM1;RPL10;RPL23;RPS6;RPS3A;ATP1B1;LDHA;RPS19;FTH1;PGK1;RPS20;CALM2;TGM2
Tolazamide-1500 mg/kg in CMC-Rat-Heart-3d-dn	14/319	3.7069e-07	1.83274e-06	0	0	5.38493	79.7394	HSPA8;RPL10;TPM1;RPS6;ATP1B1;LDHA;TUBA1B;PGK1;RPS20;VIM;P4HB;SLC38A2;CALM2;TPT1
Sodium Nitroprusside-6 mg/kg in Saline-Rat-Heart-5d-dn	13/272	3.75488e-07	1.85529e-06	0	0	5.86431	86.7627	ITGB1;JUN;CTGF;VEGFA;H1F0;FTH1;PGK1;TXNIP;RPS20;SLC38A2;CALM2;TPT1;RAI14
Tacrolimus-134 mg/kg in CMC-Rat-Heart-1d-dn	13/272	3.75488e-07	1.85413e-06	0	0	5.86431	86.7627	HSPA8;RPL10;RPL23;TPM1;ATP1B1;CTGF;VEGFA;TUBA1B;PSMD3;TXNIP;SLC38A2;TPT1;TGM2
Cadmium Acetate-167 mg/kg in Water-Rat-Kidney-5d-dn	14/320	3.84944e-07	1.89964e-06	0	0	5.3681	79.2877	HSPA8;JUN;EEF2;H1F0;TUBA1B;PSAT1;FTH1;CFL1;PGK1;SPP1;TXNIP;P4HB;SLC38A2;TGM2
Chlorzoxazone-763 mg/kg in CMC-Rat-Liver-5d-dn	14/320	3.84944e-07	1.89845e-06	0	0	5.3681	79.2877	HSPA8;JUN;IGFBP3;ATP1B1;EEF2;C3;FADS2;LDHA;H1F0;FTH1;FASN;PGK1;VIM;SLC38A2
Clonazepam-2500 mg/kg in CMC-Rat-Liver-1d-up	14/320	3.84944e-07	1.89726e-06	0	0	5.3681	79.2877	HSPA8;NQO1;TRAM1;RPS6;RPS3A;ATP1B1;EEF2;ICAM1;RPS19;FTH1;FASN;PSMD3;PGK1;TPT1
Clotrimazole-52 mg/kg in Corn Oil-Rat-Liver-1d-up	14/320	3.84944e-07	1.89607e-06	0	0	5.3681	79.2877	HSPA8;NQO1;STAT1;RPL23;EEF2;LDHA;TUBA1B;RPS19;PLAU;CFL1;PSMD3;PGK1;RPS20;CALM2
Erythromycin-1500 mg/kg in CMC-Rat-Liver-5d-up	14/320	3.84944e-07	1.89489e-06	0	0	5.3681	79.2877	ABCC3;HSPA8;NQO1;RPL10;RPL23;RPS6;RPS3A;ATP1B1;C3;SLC7A5;RPS19;FTH1;RPS20;TPT1
Gabapentin-500 uM in DMSO-Rat-Primary rat hepatocytes-1d-dn	14/320	3.84944e-07	1.8937e-06	0	0	5.3681	79.2877	ITGB1;NPM1;RPL10;RPS6;RPS3A;YBX1;ATP1B1;LDHA;RPS19;FTH1;CFL1;VIM;CALM2;TGM2
1-Naphthyl Isothiocyanate-60 mg/kg in Corn Oil-Rat-Liver-1d-up	13/273	3.91511e-07	1.9248e-06	0	0	5.84283	86.2007	HSPA8;NQO1;RPL10;RPL23;RPS6;RPS3A;LDHA;RPS19;CFL1;LCN2;RPS20;P4HB;RAI14
17-Methyltestosterone-2000 mg/kg in CMC-Rat-Liver-3d-dn	13/273	3.91511e-07	1.9236e-06	0	0	5.84283	86.2007	TRAM1;IGFBP3;YBX1;ICAM1;C3;FADS2;LDHA;H1F0;FASN;PGK1;TXNIP;P4HB;TPT1
Bithionol-333 mg/kg in Corn Oil-Rat-Bone marrow-3d-dn	13/273	3.91511e-07	1.9224e-06	0	0	5.84283	86.2007	NPM1;RPL10;RPL23;ASNS;SLC7A5;H1F0;TUBA1B;RPS19;FTH1;CFL1;P4HB;CALM2;RAI14
Cerivastatin-0.05 mg/kg in Corn Oil-Rat-Liver-0.25d-dn	13/273	3.91511e-07	1.92121e-06	0	0	5.84283	86.2007	TRAM1;RPL23;RPS3A;ICAM1;VEGFA;C3;H1F0;PLAU;PGK1;TXNIP;RPS20;P4HB;TPT1
Etoposide-188 mg/kg in Corn Oil-Rat-Kidney-1d-dn	13/273	3.91511e-07	1.92001e-06	0	0	5.84283	86.2007	TRAM1;RPL10;RPL23;IGFBP3;RPS6;YBX1;EEF2;LDHA;H1F0;RPS19;SPP1;RPS20;TGM2
Lead (II) Acetate-600 mg/kg in Saline-Rat-Liver-1d-dn	13/273	3.91511e-07	1.91882e-06	0	0	5.84283	86.2007	RPL10;RPL23;RPS6;RPS3A;YBX1;C3;LDHA;RPS19;FASN;RPS20;P4HB;CALM2;TPT1
Lomustine-4.2 mg/kg in Corn Oil-Rat-Liver-3d-dn	13/273	3.91511e-07	1.91762e-06	0	0	5.84283	86.2007	HSPA8;NQO1;JUN;TRAM1;RPS6;EEF2;ICAM1;C3;FADS2;LDHA;PGK1;CALM2;RAI14
Ethylene Glycol-3525 mg/kg in Water-Rat-Kidney-1d-up	15/371	3.98452e-07	1.95041e-06	0	0	4.96089	73.1021	GPX2;NPM1;RPL10;NAP1L1;YBX1;EEF2;LDHA;FTH1;CFL1;PSMD3;PGK1;SPP1;TXNIP;TPT1;TGM2
Aminoglutethimide-350 mg/kg in CMC-Rat-Liver-3d-up	14/321	3.99689e-07	1.95525e-06	0	0	5.35138	78.8396	ABCC3;HSPA8;NQO1;GPX2;NPM1;RPL10;EEF2;ICAM1;TUBA1B;RPS19;CFL1;PSMD3;RPS20;P4HB
Camptothecin-2.5 mg/kg in Saline-Rat-Heart-5d-dn	14/321	3.99689e-07	1.95403e-06	0	0	5.35138	78.8396	HSPA8;RPL10;RPL23;TPM1;RPS6;RPS3A;YBX1;ATP1B1;EEF2;VEGFA;LDHA;H1F0;RPS20;VIM
Chlorambucil-0.6 mg/kg in Corn Oil-Rat-Liver-3d-dn	14/321	3.99689e-07	1.95282e-06	0	0	5.35138	78.8396	HSPA8;JUN;RPS6;RPS3A;YBX1;EEF2;VEGFA;C3;FADS2;RPS19;FTH1;P4HB;CALM2;TPT1
Enalapril-1500 mg/kg in CMC-Rat-Kidney-5d-dn	14/321	3.99689e-07	1.95161e-06	0	0	5.35138	78.8396	IGFBP3;RPS3A;EEF2;CTGF;LDHA;H1F0;PLAU;CFL1;PGK1;VIM;SLC38A2;CALM2;TPT1;TGM2
Mycophenolate Mofetil-63 mg/kg in CMC-Rat-Bone marrow-3d-up	14/321	3.99689e-07	1.9504e-06	0	0	5.35138	78.8396	HSPA8;NPM1;RPL23;RPS6;RPS3A;NAP1L1;LDHA;RPS19;CFL1;PGK1;LCN2;TXNIP;RPS20;VIM
Sulindac-64 mg/kg in Corn Oil-Rat-Kidney-3d-dn	12/229	4.03576e-07	1.96815e-06	0	0	6.42966	94.6633	JUN;H1F0;TUBA1B;RPL10;IGFBP3;CFL1;PGK1;TXNIP;P4HB;EEF2;TPT1;TGM2
Clotrimazole-60 uM in DMSO-Rat-Primary rat hepatocytes-1d-up	13/274	4.08143e-07	1.98919e-06	0	0	5.8215	85.6439	NQO1;NPM1;RPL23;ASNS;RPS3A;SLC7A5;LDHA;H1F0;TUBA1B;PSAT1;FASN;PGK1;LCN2
Gentamicin-40 mg/kg in Saline-Rat-Kidney-28d-dn	13/274	4.08143e-07	1.98796e-06	0	0	5.8215	85.6439	HSPA8;IGFBP3;RPS6;RPS3A;YBX1;ATP1B1;LDHA;H1F0;PSAT1;FTH1;CFL1;PGK1;TPT1
NN-Dimethylformamide-140 mg/kg in Saline-Rat-Kidney-0.25d-dn	13/274	4.08143e-07	1.98673e-06	0	0	5.8215	85.6439	JUN;RPL23;RPS6;RPS3A;EEF2;LDHA;H1F0;RPS19;PSAT1;TXNIP;VIM;CALM2;TGM2
Stanozolol-150 mg/kg in Water-Rat-Liver-3d-dn	13/274	4.08143e-07	1.98551e-06	0	0	5.8215	85.6439	RPL10;IGFBP3;RPS3A;ICAM1;VEGFA;C3;LDHA;PLAU;RPS20;SLC38A2;CALM2;TPT1;TGM2
Promethazine-113 mg/kg in Saline-Rat-Liver-1d-up	15/372	4.12296e-07	2.00447e-06	0	0	4.94756	72.7366	NQO1;NPM1;RPL10;RPS3A;EEF2;ICAM1;FADS2;LDHA;RPS19;PLAU;FTH1;CFL1;RPS20;CALM2;TPT1
Atorvastatin-2.5 mg/kg in Corn Oil-Rat-Kidney-3d-dn	14/322	4.14939e-07	2.01608e-06	0	0	5.33476	78.3949	JUN;TRAM1;NPM1;RPS6;YBX1;EEF2;CTGF;RPS19;PSAT1;PGK1;SPP1;TXNIP;CALM2;TPT1
Bis(2-Ethylhexyl)Phthalate-100 mg/kg in Corn Oil-Rat-Liver-1d-up	14/322	4.14939e-07	2.01484e-06	0	0	5.33476	78.3949	JUN;RPS6;EEF2;FADS2;LDHA;TUBA1B;RPS19;CFL1;PGK1;TXNIP;RPS20;P4HB;CALM2;TPT1
Famciclovir-112 mg/kg in Saline-Rat-Liver-0.25d-up	14/322	4.14939e-07	2.01359e-06	0	0	5.33476	78.3949	HSPA8;NQO1;RPL10;RPL23;RPS6;RPS3A;ATP1B1;ICAM1;LDHA;PLAU;PSAT1;FTH1;PGK1;RPS20
Imatinib-150 mg/kg in Water-Rat-Liver-1d-dn	14/322	4.14939e-07	2.01235e-06	0	0	5.33476	78.3949	HSPA8;RPL23;RPS6;RPS3A;EEF2;ICAM1;VEGFA;C3;LDHA;RPS19;FASN;PGK1;RPS20;P4HB
Valproic Acid-235 mg/kg in Water-Rat-Bone marrow-1d-up	14/322	4.14939e-07	2.01112e-06	0	0	5.33476	78.3949	HSPA8;NPM1;RPL10;NAP1L1;YBX1;TUBA1B;RPS19;FTH1;PSMD3;PGK1;RPS20;P4HB;TPT1;RAI14
Aldosterone-0.065 mg/kg in Saline-Rat-Heart-5d-dn	13/275	4.25405e-07	2.06057e-06	0	0	5.80033	85.0922	HSPA8;RPL23;TPM1;RPS6;RPS3A;YBX1;CTGF;LDHA;FTH1;TXNIP;VIM;SLC38A2;TPT1
Beta-Estradiol-150 mg/kg in Corn Oil-Rat-Kidney-5d-up	13/275	4.25405e-07	2.0593e-06	0	0	5.80033	85.0922	NQO1;NPM1;RPS6;RPS3A;ATP1B1;VEGFA;RPS19;PLAU;PSAT1;PSMD3;SPP1;TXNIP;RPS20
Carbachol-15 mg/kg in Water-Rat-Brain-5d-up	13/275	4.25405e-07	2.05804e-06	0	0	5.80033	85.0922	HSPA8;NPM1;RPL10;RPL23;RPS6;RPS3A;TUBA1B;RPS19;PGK1;TXNIP;VIM;SLC38A2;TPT1
Cephalexin-2500 mg/kg in CMC-Rat-Kidney-3d-dn	13/275	4.25405e-07	2.05678e-06	0	0	5.80033	85.0922	RPL23;RPS6;YBX1;ATP1B1;LDHA;H1F0;RPS19;PLAU;PGK1;SPP1;TXNIP;RPS20;P4HB
Oxybutynin-230 mg/kg in Water-Rat-Heart-1d-up	13/275	4.25405e-07	2.05551e-06	0	0	5.80033	85.0922	ITGB1;RPL10;RPL23;RPS6;PLOD2;ATP1B1;LDHA;TUBA1B;RPS19;CFL1;VIM;P4HB;TGM2
Salicylamide-1300 mg/kg in CMC-Rat-Kidney-3d-dn	13/275	4.25405e-07	2.05425e-06	0	0	5.80033	85.0922	RPL10;RPS6;YBX1;EEF2;H1F0;RPS19;PLAU;FTH1;PGK1;SPP1;RPS20;VIM;CALM2
Mitomycin C-0.5 mg/kg in Saline-Rat-Spleen-3d-up	14/323	4.30712e-07	2.07861e-06	0	0	5.31824	77.9538	HSPA8;NPM1;RPL10;RPS3A;ATP1B1;LDHA;TUBA1B;RPS19;FTH1;PSMD3;TXNIP;RPS20;TPT1;RAI14
NN-Dimethylformamide-1400 mg/kg in Saline-Rat-Bone marrow-5d-dn	14/323	4.30712e-07	2.07733e-06	0	0	5.31824	77.9538	TRAM1;ANXA2;RPL10;RPL23;YBX1;C3;RPS19;FTH1;PSMD3;LCN2;RPS20;VIM;P4HB;CALM2
Neomycin-877 mg/kg in Corn Oil-Rat-Liver-5d-up	14/323	4.30712e-07	2.07606e-06	0	0	5.31824	77.9538	HSPA8;TRAM1;NPM1;RPL10;RPL23;RPS3A;ATP1B1;ICAM1;LDHA;PLAU;FTH1;RPS20;CALM2;TPT1
Phenacemide-400 mg/kg in CMC-Rat-Heart-3d-dn	14/323	4.30712e-07	2.07479e-06	0	0	5.31824	77.9538	HSPA8;RPL10;TPM1;RPS6;RPS3A;ATP1B1;VEGFA;TUBA1B;RPS19;FTH1;PGK1;RPS20;VIM;SLC38A2
Tretinoin-7 mg/kg in Corn Oil-Rat-Liver-3d-up	14/323	4.30712e-07	2.07352e-06	0	0	5.31824	77.9538	HSPA8;NQO1;RPL10;RPS3A;ICAM1;C3;FASN;PSMD3;LCN2;RPS20;VIM;SLC38A2;TPT1;TGM2
Hydrazine-45 mg/kg in Water-Rat-Kidney-3d-dn	13/276	4.43317e-07	2.1329e-06	0	0	5.77932	84.5455	HSPA8;RPL10;RPL23;RPS6;RPS3A;EEF2;CTGF;RPS19;FTH1;CFL1;VIM;SLC38A2;TGM2
Niacin-2625 mg/kg in Water-Rat-Liver-0.25d-up	13/276	4.43317e-07	2.1316e-06	0	0	5.77932	84.5455	NQO1;NPM1;RPL23;RPS6;ATP1B1;VEGFA;C3;RPS19;FTH1;TXNIP;RPS20;VIM;SLC38A2
Alfacalcidol-0.043 mg/kg in CMC-Rat-Heart-5d-dn	14/324	4.47021e-07	2.1481e-06	0	0	5.30183	77.5162	RPL10;TPM1;RPS6;RPS3A;EEF2;LDHA;TUBA1B;FTH1;PSMD3;PGK1;VIM;CALM2;TPT1;TGM2
Cilostazol-1500 mg/kg in CMC-Rat-Heart-5d-up	14/324	4.47021e-07	2.14679e-06	0	0	5.30183	77.5162	NPM1;RPL10;RPS6;RPS3A;LDHA;H1F0;TUBA1B;CFL1;PGK1;VIM;SLC38A2;CALM2;TPT1;TGM2
Daunorubicin-1.5 uM in DMSO-Rat-Primary rat hepatocytes-1d-up	14/324	4.47021e-07	2.14548e-06	0	0	5.30183	77.5162	HSPA8;NPM1;RPL10;RPS6;RPS3A;YBX1;CTGF;LDHA;TUBA1B;CFL1;PGK1;LCN2;CALM2;TPT1
Daunorubicin-3.25 mg/kg in Saline-Rat-Liver-1d-dn	14/324	4.47021e-07	2.14417e-06	0	0	5.30183	77.5162	NQO1;TRAM1;RPL23;RPS6;RPS3A;YBX1;EEF2;FADS2;LDHA;RPS19;FASN;PGK1;RPS20;P4HB
Ferrocene-330 mg/kg in CMC-Rat-Kidney-1d-dn	14/324	4.47021e-07	2.14287e-06	0	0	5.30183	77.5162	TRAM1;RPL10;RPL23;RPS6;YBX1;LDHA;H1F0;TUBA1B;RPS19;PLAU;SPP1;P4HB;CALM2;TPT1
Niacin-2625 mg/kg in Water-Rat-Liver-0.25d-dn	14/324	4.47021e-07	2.14157e-06	0	0	5.30183	77.5162	TRAM1;RPL10;RPS3A;YBX1;EEF2;FADS2;LDHA;TUBA1B;FASN;CFL1;P4HB;TPT1;TGM2;RAI14
Penicillamine-852 mg/kg in Water-Rat-Bone marrow-5d-up	14/324	4.47021e-07	2.14026e-06	0	0	5.30183	77.5162	HSPA8;RPL23;RPS6;ASNS;RPS3A;NAP1L1;YBX1;LDHA;FTH1;PSMD3;LCN2;SPP1;RPS20;TPT1
24-Diaminophenol-60 mg/kg in Water-Rat-Kidney-3d-dn	13/277	4.61901e-07	2.21016e-06	0	0	5.75845	84.0039	HSPA8;JUN;RPL10;RPL23;RPS6;YBX1;EEF2;CTGF;AKAP12;H1F0;RPS19;TXNIP;SLC38A2
Aspirin-35 mg/kg in Corn Oil-Rat-Kidney-1d-dn	13/277	4.61901e-07	2.20882e-06	0	0	5.75845	84.0039	RPL10;RPL23;RPS3A;YBX1;EEF2;CTGF;VEGFA;H1F0;PSAT1;FTH1;SPP1;RPS20;TPT1
Dipyrone-1636 mg/kg in Water-Rat-Liver-5d-up	13/277	4.61901e-07	2.20748e-06	0	0	5.75845	84.0039	ABCC3;NQO1;TRAM1;NPM1;RPL10;RPL23;RPS6;YBX1;EEF2;PSAT1;FTH1;PGK1;RPS20
Ethinylestradiol-1480 mg/kg in Corn Oil-Rat-Liver-5d-up	13/277	4.61901e-07	2.20614e-06	0	0	5.75845	84.0039	ABCC3;HSPA8;NQO1;RPL23;RPS6;RPS3A;ICAM1;RPS19;FTH1;RPS20;P4HB;TGM2;RAI14
Indomethacin-12 mg/kg in Water-Rat-Liver-1d-up	13/277	4.61901e-07	2.20481e-06	0	0	5.75845	84.0039	JUN;TRAM1;NPM1;RPL23;RPS6;ICAM1;VEGFA;C3;RPS19;FTH1;LCN2;RPS20;SLC38A2
Oxfendazole-1500 mg/kg in CMC-Rat-Kidney-3d-dn	13/277	4.61901e-07	2.20347e-06	0	0	5.75845	84.0039	RPL23;RPS6;EEF2;LDHA;TUBA1B;RPS19;FTH1;CFL1;PGK1;RPS20;CALM2;TPT1;TGM2
Piclamilast-17 mg/kg in CMC-Rat-Liver-3d-up	13/277	4.61901e-07	2.20214e-06	0	0	5.75845	84.0039	ITGB1;NQO1;NPM1;RPS6;RPS3A;ATP1B1;ICAM1;C3;LCN2;RPS20;SLC38A2;CALM2;TPT1
Benzethonium Chloride-5 mg/kg in Water-Rat-Heart-5d-up	14/325	4.63883e-07	2.21025e-06	0	0	5.28551	77.082	TRAM1;NPM1;RPL23;RPS6;LDHA;TUBA1B;FTH1;CFL1;PSMD3;TXNIP;VIM;P4HB;SLC38A2;CALM2
Benzoic Acid-1700 mg/kg in CMC-Rat-Liver-3d-up	14/325	4.63883e-07	2.20891e-06	0	0	5.28551	77.082	NPM1;RPL10;RPS6;ATP1B1;LDHA;H1F0;RPS19;FASN;CFL1;PGK1;RPS20;P4HB;SLC38A2;CALM2
Etoposide-188 mg/kg in Corn Oil-Rat-Heart-1d-up	14/325	4.63883e-07	2.20758e-06	0	0	5.28551	77.082	ITGB1;NPM1;RPL10;STAT1;TPM1;ATP1B1;IFIT2;LDHA;FTH1;PGK1;TXNIP;P4HB;SLC38A2;TGM2
Lomustine-4.2 mg/kg in Corn Oil-Rat-Liver-5d-up	14/325	4.63883e-07	2.20624e-06	0	0	5.28551	77.082	NQO1;NPM1;RPL10;RPL23;RPS6;RPS3A;VEGFA;RPS19;PLAU;PSAT1;FTH1;PSMD3;RPS20;TPT1
Loratadine-10 mg/kg in Water-Rat-Heart-5d-up	14/325	4.63883e-07	2.20491e-06	0	0	5.28551	77.082	JUN;RPL23;TPM1;RPS6;RPS3A;YBX1;CTGF;VEGFA;TUBA1B;PSMD3;TXNIP;VIM;SLC38A2;TPT1
Neostigmine Bromide-11 mg/kg in Water-Rat-Liver-1d-up	14/325	4.63883e-07	2.20358e-06	0	0	5.28551	77.082	HSPA8;TRAM1;RPL23;RPS6;RPS3A;ICAM1;C3;FADS2;RPS19;FTH1;FASN;RPS20;CALM2;TPT1
Pramoxine-526 mg/kg in Corn Oil-Rat-Liver-3d-dn	14/325	4.63883e-07	2.20225e-06	0	0	5.28551	77.082	HSPA8;JUN;NPM1;RPL10;RPL23;RPS6;VEGFA;FADS2;TUBA1B;RPS19;FTH1;FASN;PGK1;RAI14
Gliclazide-1500 mg/kg in CMC-Rat-Kidney-5d-dn	13/278	4.81178e-07	2.28299e-06	0	0	5.73774	83.4671	RPS6;RPS3A;LDHA;H1F0;RPS19;PLAU;PSAT1;FTH1;SPP1;TXNIP;VIM;CALM2;TGM2
Roxithromycin-312 mg/kg in CMC-Rat-Kidney-3d-up	13/278	4.81178e-07	2.28161e-06	0	0	5.73774	83.4671	HSPA8;RPS3A;YBX1;ATP1B1;RPS19;PLAU;FTH1;SPP1;TXNIP;P4HB;SLC38A2;TPT1;RAI14
Azathioprine-20 mg/kg in Corn Oil-Rat-Kidney-3d-dn	14/326	4.81314e-07	2.28089e-06	0	0	5.2693	76.6511	TRAM1;NPM1;IGFBP3;RPS6;YBX1;ATP1B1;RPS19;FTH1;PGK1;SPP1;RPS20;P4HB;TPT1;TGM2
BW-723C86-10 mg/kg in Saline-Rat-Heart-1d-up	14/326	4.81314e-07	2.27951e-06	0	0	5.2693	76.6511	ITGB1;RPL10;IGFBP3;RPS6;RPS3A;CTGF;ALDH3A1;LDHA;FTH1;CFL1;PGK1;RPS20;CALM2;TGM2
Chlorpromazine-73 mg/kg in Water-Rat-Liver-5d-dn	14/326	4.81314e-07	2.27814e-06	0	0	5.2693	76.6511	RPL10;RPL23;EEF2;VEGFA;C3;LDHA;RPS19;FASN;PGK1;TXNIP;P4HB;SLC38A2;CALM2;TPT1
N-Nitrosodiethylamine-1.67 mg/kg in Saline-Rat-Liver-0.25d-up	15/377	4.88254e-07	2.3096e-06	0	0	4.88194	70.9464	ITGB1;HSPA8;RPS6;RPS3A;YBX1;EEF2;C3;LDHA;RPS19;PLAU;FTH1;CFL1;RPS20;CALM2;TPT1
Sildenafil-90 uM in DMSO-Rat-Primary rat hepatocytes-1d-up	15/377	4.88254e-07	2.30822e-06	0	0	4.88194	70.9464	NQO1;GPX2;NPM1;RPL10;RPS3A;CTGF;LDHA;TUBA1B;PSAT1;FASN;PGK1;P4HB;SLC38A2;CALM2;TPT1
17-Methyltestosterone-2000 mg/kg in CMC-Rat-Liver-3d-up	14/327	4.99333e-07	2.35917e-06	0	0	5.25318	76.2237	ABCC3;HSPA8;NQO1;GPX2;NPM1;RPL10;RPS6;RPS3A;EEF2;VEGFA;RPS19;CFL1;PSMD3;RPS20
3-Acetamidophenol-700 mg/kg in Corn Oil-Rat-Kidney-1d-dn	14/327	4.99333e-07	2.35776e-06	0	0	5.25318	76.2237	HSPA8;RPL10;RPL23;RPS6;RPS3A;ATP1B1;LDHA;PSAT1;PGK1;RPS20;P4HB;CALM2;TPT1;TGM2
4-Nonylphenol-20 mg/kg in Corn Oil-Rat-Liver-1d-up	14/327	4.99333e-07	2.35635e-06	0	0	5.25318	76.2237	TRAM1;NPM1;RPL10;RPS6;YBX1;EEF2;ICAM1;C3;FADS2;TUBA1B;FTH1;P4HB;CALM2;RAI14
Benzethonium Chloride-5 mg/kg in Water-Rat-Heart-3d-up	14/327	4.99333e-07	2.35494e-06	0	0	5.25318	76.2237	JUN;TRAM1;RPL23;TPM1;RPS6;YBX1;ATP1B1;VEGFA;RPS19;CFL1;TXNIP;RPS20;SLC38A2;TPT1
Bromisovalum-250 mg/kg in Corn Oil-Rat-Heart-5d-dn	14/327	4.99333e-07	2.35353e-06	0	0	5.25318	76.2237	RPL10;RPL23;TPM1;RPS6;RPS3A;ATP1B1;EEF2;LDHA;PGK1;RPS20;VIM;SLC38A2;CALM2;TPT1
Cytarabine-487 mg/kg in Saline-Rat-Kidney-3d-dn	14/327	4.99333e-07	2.35212e-06	0	0	5.25318	76.2237	JUN;RPL10;RPL23;IGFBP3;RPS6;EEF2;CTGF;H1F0;TUBA1B;PSAT1;RPS20;TPT1;TGM2;RAI14
Dexfenfluramine-29 mg/kg in Water-Rat-Heart-1d-dn	14/327	4.99333e-07	2.35071e-06	0	0	5.25318	76.2237	RPL10;RPL23;RPS6;RPS3A;ATP1B1;EEF2;TUBA1B;RPS19;CFL1;PGK1;RPS20;VIM;CALM2;TPT1
Foscarnet-350 mg/kg in Saline-Rat-Kidney-3d-dn	14/327	4.99333e-07	2.34931e-06	0	0	5.25318	76.2237	NPM1;RPL10;RPS6;RPS3A;LDHA;TUBA1B;PGK1;SPP1;RPS20;VIM;P4HB;SLC38A2;CALM2;TPT1
Procainamide-755 mg/kg in Water-Rat-Heart-3d-up	14/327	4.99333e-07	2.34791e-06	0	0	5.25318	76.2237	ITGB1;HSPA8;NPM1;RPL10;RPL23;TPM1;YBX1;ATP1B1;ICAM1;FTH1;TXNIP;RPS20;P4HB;SLC38A2
Rifabutin-1500 mg/kg in CMC-Rat-Kidney-5d-up	14/327	4.99333e-07	2.34651e-06	0	0	5.25318	76.2237	HSPA8;NPM1;RPL10;RPL23;IGFBP3;RPS6;ATP1B1;VEGFA;PLAU;TXNIP;RPS20;P4HB;SLC38A2;TPT1
Sparfloxacin-450 mg/kg in Corn Oil-Rat-Liver-0.25d-up	14/327	4.99333e-07	2.34511e-06	0	0	5.25318	76.2237	HSPA8;TRAM1;NPM1;RPL10;RPL23;ASNS;RPS3A;ICAM1;C3;RPS19;PLAU;PSAT1;RPS20;TPT1
Streptomycin-120 mg/kg in Saline-Rat-Kidney-5d-dn	14/327	4.99333e-07	2.34371e-06	0	0	5.25318	76.2237	HSPA8;TRAM1;RPL10;RPL23;RPS6;RPS3A;LDHA;PLAU;PGK1;SPP1;RPS20;SLC38A2;CALM2;TPT1
Bezafibrate-100 mg/kg in Corn Oil-Rat-Kidney-1d-up	13/279	5.01173e-07	2.35094e-06	0	0	5.71718	82.9352	HSPA8;GPX2;RPL23;RPS6;ATP1B1;LDHA;RPS19;PSAT1;FTH1;FASN;RPS20;SLC38A2;RAI14
Dicumarol-13 mg/kg in Corn Oil-Rat-Liver-1d-dn	13/279	5.01173e-07	2.34954e-06	0	0	5.71718	82.9352	HSPA8;TRAM1;NPM1;RPL10;RPL23;RPS6;RPS3A;ICAM1;C3;FADS2;TUBA1B;RPS19;CALM2
Enalapril-1500 mg/kg in CMC-Rat-Kidney-5d-up	13/279	5.01173e-07	2.34815e-06	0	0	5.71718	82.9352	HSPA8;NQO1;TRAM1;GPX2;NPM1;RPL10;RPL23;RPS6;ATP1B1;VEGFA;RPS19;FTH1;SPP1
Lead(IV) Acetate-200 mg/kg in Saline-Rat-Liver-1d-dn	13/279	5.01173e-07	2.34675e-06	0	0	5.71718	82.9352	JUN;RPL23;RPS6;RPS3A;YBX1;ICAM1;C3;FADS2;LDHA;RPS19;FASN;P4HB;TPT1
Levofloxacin-739 mg/kg in Water-Rat-Heart-1d-up	13/279	5.01173e-07	2.34536e-06	0	0	5.71718	82.9352	HSPA8;RPL23;RPS6;RPS3A;ATP1B1;VEGFA;H1F0;RPS19;TXNIP;RPS20;VIM;TPT1;TGM2
Quinapril-2500 mg/kg in CMC-Rat-Kidney-3d-up	13/279	5.01173e-07	2.34396e-06	0	0	5.71718	82.9352	HSPA8;RPL10;RPL23;RPS6;ATP1B1;VEGFA;LDHA;H1F0;RPS19;PSMD3;LCN2;TXNIP;RPS20
Sulfaphenazole-1695 mg/kg in Water-Rat-Liver-3d-dn	13/279	5.01173e-07	2.34257e-06	0	0	5.71718	82.9352	NPM1;RPL10;RPL23;IGFBP3;VEGFA;C3;LDHA;TUBA1B;RPS19;FTH1;PGK1;TXNIP;RPS20
Tropisetron-100 mg/kg in CMC-Rat-Liver-3d-dn	13/279	5.01173e-07	2.34118e-06	0	0	5.71718	82.9352	HSPA8;TRAM1;NPM1;RPL23;IGFBP3;ICAM1;C3;LDHA;FASN;RPS20;P4HB;CALM2;TPT1
44'-Methylenedianiline-81 mg/kg in Corn Oil-Rat-Kidney-3d-dn	14/328	5.17955e-07	2.41815e-06	0	0	5.23717	75.7995	TRAM1;RPL10;RPL23;RPS6;RPS3A;ATP1B1;LDHA;RPS19;PSAT1;FTH1;PGK1;RPS20;P4HB;CALM2
Doxapram-2 mg/kg in Saline-Rat-Liver-5d-up	14/328	5.17955e-07	2.41671e-06	0	0	5.23717	75.7995	NPM1;RPL10;STAT1;RPL23;RPS3A;C3;TUBA1B;FTH1;CFL1;LCN2;RPS20;VIM;CALM2;TGM2
6-Mercaptopurine-25 mg/kg in Corn Oil-Rat-Liver-3d-dn	13/280	5.21907e-07	2.43371e-06	0	0	5.69676	82.408	JUN;RPL10;RPS3A;YBX1;EEF2;ICAM1;VEGFA;C3;FASN;CFL1;P4HB;CALM2;TPT1
Amitriptyline-160 mg/kg in Water-Rat-Kidney-3d-dn	13/280	5.21907e-07	2.43227e-06	0	0	5.69676	82.408	HSPA8;RPL10;RPL23;RPS6;RPS3A;YBX1;EEF2;TUBA1B;RPS19;CFL1;VIM;CALM2;TGM2
Azithromycin-50 mg/kg in Water-Rat-Liver-1d-dn	13/280	5.21907e-07	2.43083e-06	0	0	5.69676	82.408	NQO1;RPL10;RPL23;ICAM1;VEGFA;C3;LDHA;FTH1;FASN;PGK1;SLC38A2;TPT1;RAI14
Busulfan-3 mg/kg in Corn Oil-Rat-Bone marrow-1d-dn	13/280	5.21907e-07	2.42939e-06	0	0	5.69676	82.408	HSPA8;NPM1;RPL10;RPL23;RPS6;RPS3A;AKAP12;LDHA;FTH1;PGK1;LCN2;TXNIP;SLC38A2
Carbon Tetrachloride-400 mg/kg in Corn Oil-Rat-Liver-3d-up	13/280	5.21907e-07	2.42796e-06	0	0	5.69676	82.408	HSPA8;NPM1;RPL10;RPL23;RPS3A;RPS19;PLAU;FTH1;TXNIP;RPS20;P4HB;CALM2;RAI14
Chlorzoxazone-763 mg/kg in CMC-Rat-Liver-5d-up	13/280	5.21907e-07	2.42653e-06	0	0	5.69676	82.408	ABCC3;NQO1;NPM1;RPL10;RPL23;RPS6;RPS3A;ICAM1;VEGFA;PSAT1;RPS20;P4HB;CALM2
Doxofylline-483 mg/kg in Water-Rat-Heart-5d-up	13/280	5.21907e-07	2.42509e-06	0	0	5.69676	82.408	JUN;ANXA2;RPL10;ATP1B1;LDHA;TUBA1B;RPS19;FTH1;CFL1;TXNIP;VIM;P4HB;TGM2
Ibuprofen-90 mg/kg in Corn Oil-Rat-Liver-1d-up	13/280	5.21907e-07	2.42367e-06	0	0	5.69676	82.408	HSPA8;NQO1;RPL10;RPS6;ASNS;YBX1;FADS2;LDHA;PSAT1;FTH1;CALM2;TPT1;TGM2
Cytarabine-487 mg/kg in Saline-Rat-Spleen-1d-up	14/329	5.37199e-07	2.49321e-06	0	0	5.22125	75.3787	HSPA8;TRAM1;NPM1;RPL10;RPL23;YBX1;RPS19;FTH1;CFL1;PGK1;RPS20;VIM;P4HB;CALM2
Ibuprofen-54 mg/kg in Corn Oil-Rat-Liver-5d-dn	14/329	5.37199e-07	2.49174e-06	0	0	5.22125	75.3787	HSPA8;JUN;TRAM1;RPL10;RPS6;RPS3A;ATP1B1;VEGFA;LDHA;RPS19;PGK1;P4HB;SLC38A2;TPT1
N-Nitrosodiethylamine-34 mg/kg in Saline-Rat-Liver-0.25d-up	14/329	5.37199e-07	2.49027e-06	0	0	5.22125	75.3787	HSPA8;NQO1;TRAM1;RPS3A;YBX1;ICAM1;VEGFA;C3;LDHA;FTH1;CFL1;PGK1;P4HB;TPT1
Rofecoxib-250 mg/kg in Corn Oil-Rat-Liver-1d-dn	14/329	5.37199e-07	2.48881e-06	0	0	5.22125	75.3787	TRAM1;RPL23;RPS6;RPS3A;ATP1B1;ICAM1;VEGFA;LDHA;H1F0;RPS19;RPS20;SLC38A2;TPT1;RAI14
Antimycin A-0.03 uM in DMSO-Rat-Primary rat hepatocytes-1d-dn	13/281	5.43404e-07	2.51608e-06	0	0	5.67648	81.8856	NPM1;RPL10;RPL23;RPS6;RPS3A;CTGF;LDHA;RPS19;FTH1;CFL1;RPS20;TPT1;TGM2
Citalopram-90 mg/kg in Corn Oil-Rat-Heart-5d-dn	13/281	5.43404e-07	2.5146e-06	0	0	5.67648	81.8856	RPL23;TPM1;RPS3A;YBX1;IFIT2;CTGF;VEGFA;RPS19;CFL1;PGK1;VIM;P4HB;SLC38A2
Mifepristone-3 mg/kg in Corn Oil-Rat-Liver-3d-up	13/281	5.43404e-07	2.51312e-06	0	0	5.67648	81.8856	TRAM1;RPL23;RPS3A;ICAM1;C3;FADS2;RPS19;PLAU;FTH1;TXNIP;RPS20;TPT1;RAI14
Nevirapine-250 uM in DMSO-Rat-Primary rat hepatocytes-1d-up	13/281	5.43404e-07	2.51165e-06	0	0	5.67648	81.8856	HSPA8;TRAM1;NPM1;RPL10;RPS3A;YBX1;VEGFA;LDHA;H1F0;TUBA1B;PGK1;LCN2;P4HB
Probenecid-600 mg/kg in Corn Oil-Rat-Kidney-5d-dn	13/281	5.43404e-07	2.51018e-06	0	0	5.67648	81.8856	ITGB1;RPL10;ATP1B1;CTGF;H1F0;RPS19;PSAT1;CFL1;PGK1;SPP1;TXNIP;SLC38A2;TPT1
CerIVastatin-7 mg/kg in Corn Oil-Rat-Kidney-3d-dn	14/330	5.57082e-07	2.57185e-06	0	0	5.20543	74.961	HSPA8;TRAM1;RPL10;RPL23;RPS6;RPS3A;ATP1B1;LDHA;RPS19;PSAT1;PGK1;RPS20;P4HB;TGM2
Cisplatin-2 mg/kg in Saline-Rat-Spleen-3d-dn	14/330	5.57082e-07	2.57035e-06	0	0	5.20543	74.961	NPM1;RPL10;RPS6;ASNS;RPS3A;YBX1;EEF2;LDHA;TUBA1B;CFL1;PGK1;P4HB;CALM2;TPT1
Diclofenac-10 mg/kg in Corn Oil-Rat-Liver-0.25d-up	14/330	5.57082e-07	2.56884e-06	0	0	5.20543	74.961	HSPA8;TRAM1;NPM1;RPL10;RPL23;RPS6;EEF2;ICAM1;H1F0;RPS19;PLAU;RPS20;P4HB;CALM2
Methapyrilene-100 mg/kg in CMC-Rat-Liver-5d-up	14/330	5.57082e-07	2.56734e-06	0	0	5.20543	74.961	ABCC3;NQO1;TRAM1;NPM1;RPL10;RPL23;RPS6;RPS3A;RPS19;FTH1;CFL1;RPS20;P4HB;CALM2
Amitraz-75 mg/kg in CMC-Rat-Liver-5d-up	13/282	5.6569e-07	2.60548e-06	0	0	5.65635	81.3679	ABCC3;HSPA8;NQO1;RPL10;RPL23;RPS6;RPS3A;ATP1B1;VEGFA;FASN;RPS20;SLC38A2;TPT1
Benzocaine-1100 mg/kg in Corn Oil-Rat-Liver-5d-up	13/282	5.6569e-07	2.60396e-06	0	0	5.65635	81.3679	JUN;TRAM1;RPL10;RPS6;RPS3A;YBX1;VEGFA;LDHA;CFL1;RPS20;P4HB;CALM2;TPT1
Bisphenol A-610 mg/kg in Corn Oil-Rat-Liver-5d-dn	13/282	5.6569e-07	2.60244e-06	0	0	5.65635	81.3679	HSPA8;RPL10;RPL23;RPS6;ATP1B1;EEF2;C3;FADS2;LDHA;FTH1;FASN;PGK1;RAI14
Gadopentetate Dimeglumine-125 mg/kg in Saline-Rat-Kidney-1d-dn	13/282	5.6569e-07	2.60092e-06	0	0	5.65635	81.3679	NPM1;RPL10;YBX1;ATP1B1;EEF2;H1F0;CFL1;PGK1;SPP1;TXNIP;P4HB;SLC38A2;TPT1
Mebendazole-714 mg/kg in Corn Oil-Rat-Liver-1d-dn	13/282	5.6569e-07	2.5994e-06	0	0	5.65635	81.3679	HSPA8;JUN;TRAM1;NPM1;RPL10;RPL23;RPS3A;ICAM1;VEGFA;H1F0;PLAU;SLC38A2;RAI14
Valdecoxib-404 mg/kg in CMC-Rat-Kidney-5d-dn	13/282	5.6569e-07	2.59788e-06	0	0	5.65635	81.3679	RPL23;RPS3A;YBX1;EEF2;CTGF;H1F0;RPS19;PSAT1;FTH1;CFL1;PGK1;TXNIP;TGM2
Vinblastine-45 uM in DMSO-Rat-Primary rat hepatocytes-1d-up	13/282	5.6569e-07	2.59637e-06	0	0	5.65635	81.3679	HSPA8;NPM1;RPL23;RPS6;RPS3A;YBX1;TUBA1B;PSAT1;FTH1;CFL1;P4HB;SLC38A2;TPT1
2-Amino-4-Nitrophenol-625 mg/kg in CMC-Rat-Heart-3d-dn	14/331	5.77625e-07	2.6496e-06	0	0	5.1897	74.5467	RPL10;RPS6;RPS3A;YBX1;ATP1B1;LDHA;H1F0;RPS19;PGK1;RPS20;VIM;SLC38A2;CALM2;TPT1
Dipyridamole-750 mg/kg in CMC-Rat-Liver-3d-dn	14/331	5.77625e-07	2.64806e-06	0	0	5.1897	74.5467	HSPA8;TRAM1;NPM1;IGFBP3;RPS3A;YBX1;ICAM1;C3;LDHA;FASN;PGK1;P4HB;CALM2;TPT1
Gatifloxacin-770 mg/kg in Corn Oil-Rat-Heart-5d-dn	14/331	5.77625e-07	2.64652e-06	0	0	5.1897	74.5467	HSPA8;RPL10;TPM1;RPS6;RPS3A;ATP1B1;EEF2;LDHA;PGK1;VIM;SLC38A2;CALM2;TPT1;TGM2
Levamisole-120 mg/kg in Water-Rat-Liver-3d-up	14/331	5.77625e-07	2.64498e-06	0	0	5.1897	74.5467	ABCC3;HSPA8;NQO1;JUN;RPL10;RPS6;RPS3A;ATP1B1;ICAM1;RPS19;FTH1;CFL1;SLC38A2;TPT1
Ifosfamide-11000 uM in DMSO-Rat-Primary rat hepatocytes-1d-up	12/237	5.82024e-07	2.66358e-06	0	0	6.21263	89.1932	C3;ITGB1;HSPA8;NQO1;RPL10;FTH1;PGK1;LCN2;RPS3A;NAP1L1;YBX1;P4HB
Beta-Naphthoflavone-1500 mg/kg in CMC-Rat-Liver-3d-dn	13/283	5.88789e-07	2.69297e-06	0	0	5.63637	80.8548	HSPA8;TRAM1;RPL23;IGFBP3;ICAM1;VEGFA;LDHA;H1F0;FTH1;FASN;PSMD3;SLC38A2;TPT1
Bisphenol A-610 mg/kg in Corn Oil-Rat-Liver-3d-dn	13/283	5.88789e-07	2.69141e-06	0	0	5.63637	80.8548	HSPA8;TRAM1;NPM1;RPL10;RPL23;IGFBP3;RPS6;C3;LDHA;PLAU;PGK1;CALM2;RAI14
Bithionol-59 mg/kg in Corn Oil-Rat-Kidney-0.25d-dn	13/283	5.88789e-07	2.68985e-06	0	0	5.63637	80.8548	NPM1;RPL10;RPL23;RPS6;ATP1B1;VEGFA;LDHA;H1F0;TUBA1B;RPS19;PSAT1;SLC38A2;TGM2
Catechol-195 mg/kg in Saline-Rat-Kidney-1d-dn	13/283	5.88789e-07	2.68829e-06	0	0	5.63637	80.8548	NPM1;RPL10;RPL23;LDHA;RPS19;PLAU;PSAT1;CFL1;PGK1;SPP1;TXNIP;P4HB;TPT1
Cortisone-206 mg/kg in CMC-Rat-Heart-5d-dn	13/283	5.88789e-07	2.68673e-06	0	0	5.63637	80.8548	HSPA8;NPM1;RPL10;RPS6;EEF2;CTGF;LDHA;TUBA1B;FTH1;CFL1;VIM;SLC38A2;TPT1
Coumarin-111 mg/kg in Corn Oil-Rat-Bone marrow-5d-up	13/283	5.88789e-07	2.68518e-06	0	0	5.63637	80.8548	TRAM1;RPL10;RPS6;RPS3A;YBX1;TUBA1B;CFL1;LCN2;SPP1;RPS20;VIM;CALM2;TPT1
Doxorubicin-3 mg/kg in Saline-Rat-Liver-3d-dn	13/283	5.88789e-07	2.68362e-06	0	0	5.63637	80.8548	ATP1B1;EEF2;FADS2;LDHA;FTH1;FASN;PSMD3;PGK1;LCN2;TXNIP;P4HB;TPT1;TGM2
Doxycycline-14 mg/kg in Water-Rat-Liver-1d-dn	13/283	5.88789e-07	2.68207e-06	0	0	5.63637	80.8548	NQO1;RPL23;RPS3A;EEF2;LDHA;H1F0;RPS19;FTH1;FASN;CFL1;PGK1;P4HB;TPT1
Leflunomide-30 mg/kg in Corn Oil-Rat-Kidney-3d-up	13/283	5.88789e-07	2.68052e-06	0	0	5.63637	80.8548	HSPA8;PLOD2;ATP1B1;VEGFA;LDHA;H1F0;TUBA1B;FTH1;SPP1;RPS20;VIM;CALM2;TPT1
N-Nitrosodiethylamine-100 mg/kg in Saline-Rat-Liver-5d-up	13/283	5.88789e-07	2.67897e-06	0	0	5.63637	80.8548	JUN;TRAM1;NPM1;LDHA;RPS19;FASN;CFL1;PGK1;TXNIP;P4HB;SLC38A2;CALM2;TPT1
Prazosin-2000 mg/kg in CMC-Rat-Heart-3d-dn	13/283	5.88789e-07	2.67743e-06	0	0	5.63637	80.8548	RPS3A;YBX1;ATP1B1;VEGFA;LDHA;TUBA1B;PGK1;TXNIP;RPS20;VIM;SLC38A2;CALM2;TPT1
Amantadine-220 mg/kg in Water-Rat-Liver-3d-up	14/332	5.98845e-07	2.72158e-06	0	0	5.17407	74.1354	RPL10;RPS6;RPS3A;ATP1B1;ICAM1;LDHA;RPS19;FTH1;FASN;RPS20;SLC38A2;CALM2;TPT1;RAI14
Cyclosporin A-70 mg/kg in Corn Oil-Rat-Kidney-5d-up	14/332	5.98845e-07	2.72001e-06	0	0	5.17407	74.1354	TRAM1;RPL10;RPL23;RPS6;ASNS;RPS3A;RPS19;FTH1;PGK1;SPP1;RPS20;P4HB;TPT1;TGM2
Dichlorvos-17 mg/kg in Water-Rat-Liver-3d-up	14/332	5.98845e-07	2.71844e-06	0	0	5.17407	74.1354	NPM1;RPL10;RPS6;RPS3A;ATP1B1;C3;LDHA;H1F0;TUBA1B;PGK1;P4HB;SLC38A2;CALM2;TPT1
Isoprenaline-15 mg/kg in Saline-Rat-Liver-3d-up	14/332	5.98845e-07	2.71688e-06	0	0	5.17407	74.1354	HSPA8;JUN;RPL23;RPS6;RPS3A;LDHA;RPS19;FASN;PGK1;RPS20;P4HB;SLC38A2;TPT1;TGM2
Lomustine-4.2 mg/kg in Corn Oil-Rat-Liver-1d-up	14/332	5.98845e-07	2.71531e-06	0	0	5.17407	74.1354	NQO1;JUN;NPM1;RPL10;RPL23;RPS3A;ICAM1;FADS2;TUBA1B;RPS19;PLAU;PSMD3;TXNIP;TPT1
Zidovudine-1540 mg/kg in Corn Oil-Rat-Liver-5d-up	14/332	5.98845e-07	2.71375e-06	0	0	5.17407	74.1354	NQO1;JUN;TRAM1;NPM1;RPL10;RPL23;C3;LDHA;RPS19;FASN;TXNIP;RPS20;CALM2;TPT1
Fluoxetine-39.6 uM in DMSO-Rat-Primary rat hepatocytes-0.67d-up	16/437	6.04671e-07	2.73858e-06	0	0	4.49243	64.3252	ITGB1;HSPA8;GPX2;NPM1;ANXA2;RPL23;RPS6;ASNS;ATP1B1;CTGF;VEGFA;TUBA1B;PSAT1;FTH1;P4HB;TPT1
Atorvastatin-2.5 mg/kg in Corn Oil-Rat-Liver-0.25d-up	13/284	6.12727e-07	2.77347e-06	0	0	5.61652	80.3463	HSPA8;TRAM1;NPM1;RPL10;RPL23;RPS6;ICAM1;C3;RPS19;PLAU;RPS20;P4HB;RAI14
Beta-Estradiol 3-Benzoate-2 mg/kg in Corn Oil-Rat-Liver-3d-up	13/284	6.12727e-07	2.77188e-06	0	0	5.61652	80.3463	HSPA8;TRAM1;NPM1;RPL10;RPL23;RPS6;EEF2;ICAM1;RPS19;FTH1;RPS20;P4HB;TPT1
Irinotecan-5 mg/kg in Saline-Rat-Heart-5d-dn	13/284	6.12727e-07	2.77029e-06	0	0	5.61652	80.3463	HSPA8;RPL10;RPL23;TPM1;RPS6;YBX1;ATP1B1;EEF2;LDHA;TUBA1B;RPS19;PGK1;VIM
Mebendazole-50 mg/kg in Corn Oil-Rat-Liver-1d-dn	13/284	6.12727e-07	2.7687e-06	0	0	5.61652	80.3463	HSPA8;JUN;TRAM1;RPL10;RPL23;RPS6;RPS3A;VEGFA;LDHA;RPS19;FTH1;FASN;TPT1
Nitrazepam-310 mg/kg in CMC-Rat-Liver-5d-dn	13/284	6.12727e-07	2.76711e-06	0	0	5.61652	80.3463	HSPA8;RPL23;RPS6;RPS3A;EEF2;ICAM1;C3;LDHA;H1F0;RPS19;PGK1;VIM;TPT1
Oxymetholone-1170 mg/kg in CMC-Rat-Liver-3d-dn	13/284	6.12727e-07	2.76552e-06	0	0	5.61652	80.3463	HSPA8;TRAM1;RPL10;RPL23;IGFBP3;ICAM1;FADS2;RPS19;FASN;PGK1;P4HB;CALM2;TPT1
Sulfadiazine-1170 mg/kg in Water-Rat-Kidney-5d-dn	13/284	6.12727e-07	2.76394e-06	0	0	5.61652	80.3463	HSPA8;JUN;RPL10;RPS6;ATP1B1;EEF2;CTGF;TUBA1B;RPS19;PGK1;RPS20;VIM;SLC38A2
Thimerosal-10 mg/kg in Water-Rat-Brain-3d-up	13/284	6.12727e-07	2.76236e-06	0	0	5.61652	80.3463	HSPA8;NPM1;RPL10;RPL23;ATP1B1;EEF2;AKAP12;H1F0;TUBA1B;PGK1;TXNIP;SLC38A2;TPT1
Zomepirac-2.8 mg/kg in Saline-Rat-Liver-0.25d-up	13/284	6.12727e-07	2.76078e-06	0	0	5.61652	80.3463	ITGB1;HSPA8;NQO1;RPL10;RPS3A;YBX1;ICAM1;VEGFA;C3;PLAU;FTH1;CFL1;TPT1
Bromisovalum-250 mg/kg in Corn Oil-Rat-Kidney-5d-dn	14/333	6.20762e-07	2.79538e-06	0	0	5.15853	73.7274	HSPA8;JUN;RPL10;RPL23;RPS6;RPS3A;ATP1B1;LDHA;RPS19;FTH1;SPP1;RPS20;CALM2;TPT1
Celecoxib-400 mg/kg in Corn Oil-Rat-Heart-3d-up	14/333	6.20762e-07	2.79379e-06	0	0	5.15853	73.7274	ITGB1;HSPA8;RPL10;RPL23;RPS3A;ATP1B1;VEGFA;LDHA;RPS19;FTH1;CFL1;VIM;CALM2;TPT1
Foscarnet-350 mg/kg in Saline-Rat-Kidney-1d-up	14/333	6.20762e-07	2.79219e-06	0	0	5.15853	73.7274	TRAM1;IGFBP3;ATP1B1;PLAU;PSAT1;FTH1;CFL1;PGK1;SPP1;TXNIP;VIM;P4HB;SLC38A2;RAI14
Hexachloro-13-Butadiene-50 mg/kg in Corn Oil-Rat-Kidney-5d-up	14/333	6.20762e-07	2.7906e-06	0	0	5.15853	73.7274	ITGB1;NQO1;GPX2;RPL10;RPS3A;ATP1B1;TUBA1B;RPS19;CFL1;PGK1;SPP1;P4HB;CALM2;TPT1
Hydrazine-45 mg/kg in Water-Rat-Liver-3d-up	14/333	6.20762e-07	2.789e-06	0	0	5.15853	73.7274	NQO1;JUN;RPL10;RPS6;RPS3A;VEGFA;FADS2;RPS19;FTH1;CFL1;PGK1;RPS20;TPT1;TGM2
Naproxen-10 mg/kg in Corn Oil-Rat-Kidney-0.25d-up	14/333	6.20762e-07	2.78741e-06	0	0	5.15853	73.7274	HSPA8;RPL23;IGFBP3;PLOD2;RPS3A;LDHA;TUBA1B;FTH1;CFL1;PSMD3;SPP1;TXNIP;RPS20;TPT1
Acetazolamide-47 mg/kg in Corn Oil-Rat-Kidney-3d-dn	13/285	6.37532e-07	2.86108e-06	0	0	5.59681	79.8423	HSPA8;JUN;NPM1;ATP1B1;EEF2;H1F0;TUBA1B;CFL1;PGK1;TXNIP;P4HB;TPT1;TGM2
Calcitriol-0.04 mg/kg in CMC-Rat-Heart-1d-dn	13/285	6.37532e-07	2.85945e-06	0	0	5.59681	79.8423	HSPA8;RPL10;RPL23;TPM1;RPS6;ATP1B1;CTGF;LDHA;TUBA1B;RPS19;RPS20;VIM;CALM2
Diethylstilbestrol-2.8 mg/kg in Corn Oil-Rat-Liver-5d-up	13/285	6.37532e-07	2.85783e-06	0	0	5.59681	79.8423	TRAM1;NPM1;RPL10;RPL23;RPS6;ASNS;RPS3A;RPS19;PLAU;RPS20;P4HB;TPT1;RAI14
Famciclovir-1200 mg/kg in Saline-Rat-Bone marrow-5d-up	13/285	6.37532e-07	2.8562e-06	0	0	5.59681	79.8423	NPM1;RPL10;RPL23;RPS6;RPS3A;LDHA;RPS19;FTH1;CFL1;TXNIP;RPS20;CALM2;TPT1
Fluconazole-394 mg/kg in Corn Oil-Rat-Liver-0.25d-up	13/285	6.37532e-07	2.85458e-06	0	0	5.59681	79.8423	HSPA8;NPM1;RPL10;RPL23;RPS6;RPS3A;C3;FADS2;RPS19;PLAU;RPS20;P4HB;TPT1
Furan-24 mg/kg in Corn Oil-Rat-Heart-5d-dn	13/285	6.37532e-07	2.85295e-06	0	0	5.59681	79.8423	JUN;RPL10;RPS6;IFIT2;CTGF;VEGFA;LDHA;TUBA1B;RPS19;FTH1;VIM;SLC38A2;CALM2
NN-Dimethylformamide-1400 mg/kg in Saline-Rat-Kidney-5d-up	13/285	6.37532e-07	2.85133e-06	0	0	5.59681	79.8423	HSPA8;RPL23;RPS6;RPS3A;YBX1;ATP1B1;LDHA;RPS19;LCN2;SPP1;TXNIP;RPS20;RAI14
Phenelzine-27 mg/kg in Water-Rat-Brain-3d-up	13/285	6.37532e-07	2.84972e-06	0	0	5.59681	79.8423	NPM1;RPL10;RPL23;RPS3A;VEGFA;TUBA1B;RPS19;PSAT1;PGK1;RPS20;SLC38A2;CALM2;TPT1
Sulpiride-1000 mg/kg in CMC-Rat-Heart-1d-dn	13/285	6.37532e-07	2.8481e-06	0	0	5.59681	79.8423	JUN;RPL10;RPL23;IGFBP3;EEF2;CTGF;VEGFA;LDHA;RPS19;PGK1;SLC38A2;CALM2;TGM2
Terbutaline-130 mg/kg in Corn Oil-Rat-Heart-5d-up	13/285	6.37532e-07	2.84649e-06	0	0	5.59681	79.8423	HSPA8;NPM1;RPL10;PLOD2;ATP1B1;CTGF;LDHA;PGK1;RPS20;VIM;P4HB;TPT1;TGM2
Daunorubicin-3.25 mg/kg in Saline-Rat-Heart-3d-up	14/334	6.43398e-07	2.87105e-06	0	0	5.14309	73.3225	ITGB1;JUN;RPL10;TPM1;YBX1;CTGF;LDHA;RPS19;PGK1;TXNIP;P4HB;SLC38A2;CALM2;TPT1
Iproniazid-46 mg/kg in Water-Rat-Heart-5d-dn	14/334	6.43398e-07	2.86942e-06	0	0	5.14309	73.3225	HSPA8;RPL10;RPL23;TPM1;RPS6;ATP1B1;EEF2;CTGF;LDHA;H1F0;RPS19;FTH1;CFL1;PGK1
3-Methylcholanthrene-300 mg/kg in CMC-Rat-Liver-3d-dn	13/286	6.6323e-07	2.95619e-06	0	0	5.57724	79.3427	HSPA8;TRAM1;RPL23;IGFBP3;RPS6;ICAM1;VEGFA;C3;RPS19;FTH1;FASN;TXNIP;SLC38A2
Amoxicillin-1100 mg/kg in Water-Rat-Liver-1d-dn	13/286	6.6323e-07	2.95452e-06	0	0	5.57724	79.3427	HSPA8;TRAM1;NPM1;RPL23;RPS6;RPS3A;C3;RPS19;PLAU;FASN;RPS20;CALM2;RAI14
D-Limonene-1650 mg/kg in Corn Oil-Rat-Kidney-1d-dn	13/286	6.6323e-07	2.95285e-06	0	0	5.57724	79.3427	TRAM1;NPM1;RPL10;RPL23;IGFBP3;RPS6;YBX1;ATP1B1;EEF2;H1F0;RPS19;RPS20;TGM2
Diethylstilbestrol-2.8 mg/kg in Corn Oil-Rat-Bone marrow-1d-dn	13/286	6.6323e-07	2.95118e-06	0	0	5.57724	79.3427	RPL10;RPL23;RPS6;RPS3A;LDHA;TUBA1B;RPS19;FTH1;CFL1;LCN2;RPS20;VIM;CALM2
Diethylstilbestrol-280 mg/kg in Corn Oil-Rat-Spleen-5d-up	13/286	6.6323e-07	2.94952e-06	0	0	5.57724	79.3427	HSPA8;TRAM1;NPM1;RPL10;RPL23;RPS3A;NAP1L1;VEGFA;TUBA1B;RPS19;TXNIP;RPS20;TPT1
Finasteride-800 mg/kg in Corn Oil-Rat-Liver-1d-up	13/286	6.6323e-07	2.94785e-06	0	0	5.57724	79.3427	HSPA8;NQO1;NPM1;RPL23;RPS6;RPS3A;EEF2;LDHA;TUBA1B;RPS19;PSMD3;SLC38A2;RAI14
Fluphenazine-22 mg/kg in Corn Oil-Rat-Liver-3d-dn	13/286	6.6323e-07	2.94619e-06	0	0	5.57724	79.3427	JUN;RPL10;RPS6;VEGFA;C3;LDHA;CFL1;PGK1;TXNIP;P4HB;CALM2;TPT1;RAI14
Paroxetine-104 mg/kg in Water-Rat-Heart-5d-up	13/286	6.6323e-07	2.94453e-06	0	0	5.57724	79.3427	ITGB1;JUN;NPM1;RPL10;YBX1;CTGF;LDHA;FTH1;TXNIP;ITGAV;P4HB;CALM2;TPT1
Terbinafine-2000 mg/kg in CMC-Rat-Liver-1d-up	13/286	6.6323e-07	2.94287e-06	0	0	5.57724	79.3427	HSPA8;NQO1;RPL10;RPL23;RPS6;RPS3A;EEF2;ICAM1;LDHA;FTH1;PGK1;CALM2;TPT1
Amiodarone-147 mg/kg in CMC-Rat-Heart-1d-dn	14/335	6.66771e-07	2.95692e-06	0	0	5.12774	72.9206	RPL10;RPL23;PLOD2;YBX1;ATP1B1;CTGF;LDHA;TUBA1B;CFL1;PSMD3;TXNIP;VIM;CALM2;TGM2
Amitraz-75 mg/kg in CMC-Rat-Heart-3d-dn	14/335	6.66771e-07	2.95526e-06	0	0	5.12774	72.9206	ITGB1;RPL23;TPM1;RPS3A;YBX1;EEF2;VEGFA;LDHA;FTH1;PGK1;RPS20;VIM;CALM2;TPT1
1-Naphthyl Isothiocyanate-60 mg/kg in Corn Oil-Rat-Liver-0.25d-dn	13/287	6.89849e-07	3.05582e-06	0	0	5.55781	78.8475	TRAM1;EEF2;VEGFA;C3;LDHA;PLAU;FTH1;FASN;PGK1;TXNIP;P4HB;TPT1;TGM2
Catechol-40 mg/kg in Saline-Rat-Liver-3d-up	13/287	6.89849e-07	3.0541e-06	0	0	5.55781	78.8475	HSPA8;TRAM1;RPL23;RPS6;RPS3A;YBX1;EEF2;ICAM1;C3;RPS19;CFL1;P4HB;TPT1
Daunorubicin-3.25 mg/kg in Saline-Rat-Kidney-5d-dn	13/287	6.89849e-07	3.05239e-06	0	0	5.55781	78.8475	ITGB1;HSPA8;NPM1;RPL10;RPS3A;CTGF;VEGFA;TUBA1B;PLAU;TXNIP;SLC38A2;CALM2;TPT1
Ethacrynic Acid-125 mg/kg in CMC-Rat-Kidney-1d-up	13/287	6.89849e-07	3.05067e-06	0	0	5.55781	78.8475	RPL23;RPS6;YBX1;EEF2;RPS19;PSAT1;FTH1;CFL1;SPP1;RPS20;VIM;TPT1;TGM2
Fluvastatin-94 mg/kg in Corn Oil-Rat-Liver-1d-up	13/287	6.89849e-07	3.04896e-06	0	0	5.55781	78.8475	HSPA8;NPM1;RPL23;ATP1B1;ICAM1;FADS2;H1F0;TUBA1B;RPS19;FASN;PSMD3;LCN2;CALM2
Gallamine Triethiodide-2.5 mg/kg in Saline-Rat-Heart-3d-dn	13/287	6.89849e-07	3.04725e-06	0	0	5.55781	78.8475	ITGB1;TRAM1;NPM1;RPL10;RPS6;YBX1;CTGF;TUBA1B;PGK1;VIM;P4HB;SLC38A2;CALM2
Gemfibrozil-700 mg/kg in Corn Oil-Rat-Liver-0.25d-up	13/287	6.89849e-07	3.04554e-06	0	0	5.55781	78.8475	HSPA8;TRAM1;NPM1;RPL10;RPL23;RPS6;RPS3A;C3;LDHA;RPS19;FASN;TXNIP;RPS20
Zileuton-450 mg/kg in Corn Oil-Rat-Liver-5d-up	13/287	6.89849e-07	3.04384e-06	0	0	5.55781	78.8475	ABCC3;NQO1;JUN;TRAM1;YBX1;ICAM1;VEGFA;RPS19;FASN;CFL1;PGK1;RPS20;P4HB
Zomepirac-11 mg/kg in Saline-Rat-Kidney-5d-dn	13/287	6.89849e-07	3.04213e-06	0	0	5.55781	78.8475	RPL10;RPS6;YBX1;ATP1B1;EEF2;VEGFA;PLAU;PSAT1;FTH1;CFL1;PGK1;TPT1;TGM2
Ketorolac-48 mg/kg in Water-Rat-Liver-3d-up	14/336	6.90904e-07	3.04508e-06	0	0	5.11247	72.5218	HSPA8;NQO1;TRAM1;RPL23;RPS6;RPS3A;ATP1B1;EEF2;C3;FTH1;LCN2;CALM2;TPT1;TGM2
Trans-Platinum(II)Diammine Dichloride-0.5 mg/kg in Saline-Rat-Kidney-14d-up	14/336	6.90904e-07	3.04338e-06	0	0	5.11247	72.5218	GPX2;RPL10;RPS3A;ATP1B1;LDHA;TUBA1B;RPS19;CFL1;PGK1;SPP1;VIM;P4HB;CALM2;TPT1
Enoxacin-750 mg/kg in Corn Oil-Rat-Liver-5d-up	12/241	6.95162e-07	3.06042e-06	0	0	6.10951	86.6275	C3;HSPA8;TRAM1;RPS19;PLAU;RPL23;RPS6;RPS20;RPS3A;TPT1;ICAM1;RAI14
Sulfathiazole-2629 mg/kg in Water-Rat-Kidney-1d-up	15/388	7.01551e-07	3.08682e-06	0	0	4.74353	67.2157	ITGB1;IGFBP3;RPS3A;LDHA;TUBA1B;PLAU;PSAT1;FTH1;CFL1;PGK1;P4HB;SLC38A2;CALM2;TPT1;TGM2
4-Methylpyrazole-155 mg/kg in Saline-Rat-Kidney-3d-dn	14/337	7.15818e-07	3.14784e-06	0	0	5.0973	72.126	HSPA8;RPL10;RPL23;RPS6;RPS3A;ATP1B1;VEGFA;LDHA;PLAU;PSAT1;PGK1;SPP1;RPS20;TPT1
Abamectin-10 mg/kg in Water-Rat-Liver-3d-dn	14/337	7.15818e-07	3.14608e-06	0	0	5.0973	72.126	TRAM1;NPM1;RPL10;RPL23;RPS6;EEF2;VEGFA;C3;LDHA;PLAU;FTH1;FASN;RPS20;TPT1
Catechol-195 mg/kg in Saline-Rat-Bone marrow-3d-up	14/337	7.15818e-07	3.14433e-06	0	0	5.0973	72.126	RPL10;RPS6;ASNS;RPS3A;YBX1;H1F0;TUBA1B;RPS19;CFL1;LCN2;SPP1;TXNIP;CALM2;RAI14
Chlorpropamide-269 mg/kg in CMC-Rat-Heart-1d-dn	14/337	7.15818e-07	3.14258e-06	0	0	5.0973	72.126	NPM1;RPL10;RPS6;EEF2;CTGF;VEGFA;LDHA;H1F0;TUBA1B;RPS19;PSMD3;TXNIP;RPS20;VIM
Monocrotaline-333 uM in DMSO-Rat-Primary rat hepatocytes-0.67d-up	14/337	7.15818e-07	3.14083e-06	0	0	5.0973	72.126	ITGB1;GPX2;NPM1;ANXA2;RPL10;RPS3A;YBX1;EEF2;CTGF;LDHA;TUBA1B;RPS19;LCN2;RPS20
Papaverine-69 mg/kg in CMC-Rat-Heart-1d-dn	14/337	7.15818e-07	3.13908e-06	0	0	5.0973	72.126	HSPA8;RPS6;PLOD2;RPS3A;ATP1B1;CTGF;LDHA;TUBA1B;RPS19;TXNIP;RPS20;CALM2;TPT1;TGM2
Rofecoxib-775 mg/kg in Corn Oil-Rat-Liver-1d-up	14/337	7.15818e-07	3.13733e-06	0	0	5.0973	72.126	NQO1;TRAM1;RPL23;ASNS;FADS2;TUBA1B;RPS19;PLAU;PSAT1;FTH1;PGK1;RPS20;P4HB;CALM2
Tenidap-75 mg/kg in Corn Oil-Rat-Kidney-0.25d-up	14/337	7.15818e-07	3.13558e-06	0	0	5.0973	72.126	NQO1;RPL23;RPS6;RPS3A;YBX1;LDHA;RPS19;FTH1;SPP1;TXNIP;RPS20;VIM;CALM2;TPT1
Allyl Alcohol-25 mg/kg in Saline-Rat-Bone marrow-1d-up	13/288	7.17418e-07	3.14085e-06	0	0	5.53851	78.3567	HSPA8;RPS3A;LDHA;H1F0;FTH1;CFL1;LCN2;TXNIP;VIM;P4HB;CALM2;TPT1;RAI14
Diclofenac-3.5 mg/kg in Corn Oil-Rat-Liver-1d-dn	13/288	7.17418e-07	3.1391e-06	0	0	5.53851	78.3567	HSPA8;RPL10;RPS6;RPS3A;C3;LDHA;TUBA1B;FTH1;FASN;PGK1;P4HB;CALM2;TPT1
Leflunomide-60 mg/kg in Corn Oil-Rat-Bone marrow-3d-dn	13/288	7.17418e-07	3.13736e-06	0	0	5.53851	78.3567	HSPA8;RPL10;RPS6;RPS3A;EEF2;TUBA1B;RPS19;FTH1;CFL1;RPS20;SLC38A2;CALM2;RAI14
Loratadine-2000 mg/kg in Water-Rat-Heart-5d-up	13/288	7.17418e-07	3.13562e-06	0	0	5.53851	78.3567	HSPA8;JUN;RPL10;RPS6;RPS3A;YBX1;VEGFA;RPS19;FTH1;TXNIP;RPS20;TPT1;TGM2
Mevastatin-1200 mg/kg in CMC-Rat-Kidney-3d-up	13/288	7.17418e-07	3.13388e-06	0	0	5.53851	78.3567	HSPA8;JUN;NPM1;IGFBP3;CTGF;H1F0;PSAT1;FTH1;CFL1;TXNIP;P4HB;SLC38A2;TGM2
Mitomycin C-0.5 mg/kg in Saline-Rat-Bone marrow-1d-dn	13/288	7.17418e-07	3.13214e-06	0	0	5.53851	78.3567	HSPA8;NPM1;RPL10;RPL23;RPS6;RPS3A;LDHA;RPS19;CFL1;RPS20;VIM;CALM2;TPT1
Rosiglitazone-1800 mg/kg in Corn Oil-Rat-Heart-5d-up	13/288	7.17418e-07	3.13041e-06	0	0	5.53851	78.3567	NQO1;NPM1;RPL10;RPL23;IGFBP3;RPS6;YBX1;AKAP12;H1F0;FTH1;TXNIP;RPS20;TPT1
Ouabain-144 mg/kg in CMC-Rat-Heart-1d-dn	12/242	7.26332e-07	3.16755e-06	0	0	6.08427	86.0027	ITGB1;LDHA;TUBA1B;RPL10;FTH1;RPL23;TXNIP;P4HB;SLC38A2;TPT1;TGM2;VEGFA
Sulbactam-671 mg/kg in Saline-Rat-Kidney-1d-dn	12/242	7.26332e-07	3.16579e-06	0	0	6.08427	86.0027	JUN;PSAT1;FTH1;RPL23;FASN;CFL1;SPP1;TXNIP;NAP1L1;ATP1B1;SLC38A2;VEGFA
6-Mercaptopurine-25 mg/kg in Corn Oil-Rat-Kidney-1d-dn	14/338	7.41535e-07	3.23027e-06	0	0	5.08222	71.7333	HSPA8;TRAM1;RPL10;RPL23;RPS6;RPS3A;ATP1B1;LDHA;RPS19;PSAT1;FTH1;PGK1;RPS20;TGM2
Nevirapine-29 mg/kg in Saline-Rat-Liver-3d-dn	14/338	7.41535e-07	3.22849e-06	0	0	5.08222	71.7333	TRAM1;ATP1B1;VEGFA;C3;FADS2;H1F0;RPS19;PLAU;FASN;PGK1;LCN2;TXNIP;P4HB;TPT1
Salicylic Acid-223 mg/kg in Corn Oil-Rat-Liver-5d-dn	14/338	7.41535e-07	3.2267e-06	0	0	5.08222	71.7333	JUN;RPL23;RPS3A;EEF2;VEGFA;C3;TUBA1B;FTH1;CFL1;PGK1;P4HB;SLC38A2;TPT1;TGM2
Sodium Arsenite-30 mg/kg in Saline-Rat-Liver-1d-up	14/338	7.41535e-07	3.22492e-06	0	0	5.08222	71.7333	ABCC3;HSPA8;NQO1;RPS6;RPS3A;FADS2;LDHA;PSAT1;FTH1;CFL1;PSMD3;PGK1;RPS20;RAI14
Sulfadoxine-380 mg/kg in Corn Oil-Rat-Liver-3d-dn	14/338	7.41535e-07	3.22314e-06	0	0	5.08222	71.7333	HSPA8;JUN;RPL23;RPS6;RPS3A;ATP1B1;EEF2;VEGFA;C3;FADS2;RPS19;FTH1;CALM2;TPT1
Acetaminophen-100 mg/kg in Corn Oil-Rat-Liver-5d-dn	13/289	7.45967e-07	3.24062e-06	0	0	5.51935	77.8702	RPL10;RPL23;RPS6;RPS3A;EEF2;VEGFA;LDHA;FTH1;CFL1;PGK1;RPS20;CALM2;TPT1
Altretamine-13 mg/kg in Corn Oil-Rat-Bone marrow-0.25d-dn	13/289	7.45967e-07	3.23883e-06	0	0	5.51935	77.8702	RPL10;RPL23;RPS6;RPS3A;TUBA1B;RPS19;FTH1;CFL1;PSMD3;PGK1;VIM;P4HB;TPT1
Cisapride-250 mg/kg in Corn Oil-Rat-Intestine-3d-up	13/289	7.45967e-07	3.23704e-06	0	0	5.51935	77.8702	NQO1;GPX2;NPM1;RPL10;RPS6;RPS3A;ATP1B1;RPS19;FTH1;PSMD3;PGK1;SLC38A2;TPT1
Cyclosporin A-350 mg/kg in Corn Oil-Rat-Liver-3d-up	13/289	7.45967e-07	3.23526e-06	0	0	5.51935	77.8702	TRAM1;RPL23;ASNS;ICAM1;C3;H1F0;PLAU;FTH1;TXNIP;RPS20;P4HB;TPT1;RAI14
Fludrocortisone Acetate-125 mg/kg in CMC-Rat-Kidney-5d-up	13/289	7.45967e-07	3.23348e-06	0	0	5.51935	77.8702	ITGB1;HSPA8;NPM1;RPL10;RPL23;IGFBP3;RPS6;LDHA;H1F0;RPS19;RPS20;P4HB;TPT1
Mianserin-116 mg/kg in Corn Oil-Rat-Heart-3d-up	13/289	7.45967e-07	3.2317e-06	0	0	5.51935	77.8702	ITGB1;HSPA8;TPM1;YBX1;CTGF;VEGFA;TUBA1B;FTH1;CFL1;TXNIP;RPS20;TPT1;TGM2
Nadolol-1500 mg/kg in CMC-Rat-Heart-3d-dn	13/289	7.45967e-07	3.22993e-06	0	0	5.51935	77.8702	ITGB1;RPL10;RPL23;YBX1;VEGFA;LDHA;PGK1;TXNIP;RPS20;VIM;SLC38A2;CALM2;TPT1
Nitrofurantoin-76 mg/kg in CMC-Rat-Liver-1d-up	13/289	7.45967e-07	3.22815e-06	0	0	5.51935	77.8702	HSPA8;TRAM1;NPM1;RPL10;RPL23;RPS6;VEGFA;FADS2;FTH1;FASN;SLC38A2;CALM2;TPT1
Propranolol-175 mg/kg in Water-Rat-Heart-5d-dn	13/289	7.45967e-07	3.22638e-06	0	0	5.51935	77.8702	HSPA8;RPL23;TPM1;ATP1B1;CTGF;VEGFA;LDHA;RPS19;CFL1;RPS20;SLC38A2;TPT1;TGM2
SCH-351591-4.6 mg/kg in CMC-Rat-Liver-6d-up	13/289	7.45967e-07	3.22461e-06	0	0	5.51935	77.8702	HSPA8;NQO1;TRAM1;NPM1;RPL10;RPL23;RPS6;ICAM1;C3;FTH1;LCN2;TXNIP;P4HB
Valdecoxib-404 mg/kg in CMC-Rat-Kidney-3d-dn	13/289	7.45967e-07	3.22284e-06	0	0	5.51935	77.8702	TRAM1;RPL10;RPL23;RPS3A;YBX1;CTGF;RPS19;CFL1;PGK1;SPP1;P4HB;CALM2;TPT1
Zomepirac-2.8 mg/kg in Saline-Rat-Kidney-1d-dn	13/289	7.45967e-07	3.22107e-06	0	0	5.51935	77.8702	RPL23;RPS6;RPS3A;YBX1;ATP1B1;EEF2;VEGFA;PSAT1;CFL1;SPP1;RPS20;TPT1;TGM2
Acetazolamide-250 mg/kg in Corn Oil-Rat-Kidney-3d-dn	14/339	7.68078e-07	3.31473e-06	0	0	5.06723	71.3434	HSPA8;NPM1;IGFBP3;RPS6;ATP1B1;H1F0;TUBA1B;RPS19;PSAT1;CFL1;PGK1;TXNIP;TPT1;TGM2
Catechol-40 mg/kg in Saline-Rat-Spleen-0.25d-up	14/339	7.68078e-07	3.31292e-06	0	0	5.06723	71.3434	NPM1;RPL10;RPL23;RPS6;NAP1L1;YBX1;EEF2;TUBA1B;RPS19;FTH1;CFL1;PGK1;VIM;CALM2
Vecuronium Bromide-0.05 mg/kg in Saline-Rat-Liver-3d-dn	14/339	7.68078e-07	3.3111e-06	0	0	5.06723	71.3434	HSPA8;TRAM1;RPL23;RPS6;RPS3A;EEF2;C3;FADS2;RPS19;PLAU;FTH1;PSMD3;RPS20;TPT1
4-Nonylphenol-200 mg/kg in Corn Oil-Rat-Liver-3d-dn	13/290	7.75526e-07	3.34138e-06	0	0	5.50032	77.3879	HSPA8;JUN;RPL10;RPL23;IGFBP3;ICAM1;VEGFA;C3;LDHA;H1F0;PLAU;TXNIP;TPT1
Clofibrate-130 mg/kg in Corn Oil-Rat-Liver-3d-dn	13/290	7.75526e-07	3.33955e-06	0	0	5.50032	77.3879	HSPA8;NQO1;RPL10;RPS6;ICAM1;C3;LDHA;H1F0;RPS19;FTH1;PGK1;P4HB;CALM2
Closantel-22 mg/kg in CMC-Rat-Liver-5d-dn	13/290	7.75526e-07	3.33773e-06	0	0	5.50032	77.3879	IGFBP3;RPS3A;YBX1;C3;FADS2;LDHA;RPS19;FTH1;FASN;CFL1;PGK1;P4HB;TPT1
Dexamethasone-1 mg/kg in Corn Oil-Rat-Liver-3d-up	13/290	7.75526e-07	3.33591e-06	0	0	5.50032	77.3879	HSPA8;NPM1;RPL23;EEF2;ICAM1;LDHA;RPS19;PLAU;FTH1;RPS20;VIM;P4HB;TGM2
Fenofibrate-43 mg/kg in Corn Oil-Rat-Kidney-0.25d-dn	13/290	7.75526e-07	3.33409e-06	0	0	5.50032	77.3879	JUN;RPL10;RPS6;RPS3A;ATP1B1;LDHA;RPS19;FTH1;PGK1;TXNIP;RPS20;P4HB;CALM2
Methimazole-100 mg/kg in Water-Rat-Liver-3d-up	13/290	7.75526e-07	3.33227e-06	0	0	5.50032	77.3879	ABCC3;HSPA8;NQO1;NPM1;RPL10;RPL23;RPS6;EEF2;C3;FADS2;RPS19;RPS20;P4HB
NN'-Diphenyl-P-Phenylenediamine-1000 mg/kg in CMC-Rat-Liver-1d-dn	13/290	7.75526e-07	3.33045e-06	0	0	5.50032	77.3879	TRAM1;RPS6;RPS3A;ICAM1;VEGFA;LDHA;RPS19;FASN;CFL1;TXNIP;RPS20;P4HB;RAI14
NN-Dimethylformamide-700 mg/kg in Saline-Rat-Liver-1d-up	13/290	7.75526e-07	3.32863e-06	0	0	5.50032	77.3879	HSPA8;NQO1;RPL10;RPS6;RPS3A;EEF2;ICAM1;VEGFA;LDHA;RPS19;PLAU;P4HB;TPT1
Nimesulide-162 mg/kg in Corn Oil-Rat-Liver-5d-up	13/290	7.75526e-07	3.32682e-06	0	0	5.50032	77.3879	ABCC3;NQO1;NPM1;RPL23;RPS6;RPS3A;ICAM1;C3;RPS19;FTH1;LCN2;RPS20;RAI14
Indomethacin-9.6 mg/kg in Water-Rat-Kidney-3d-dn	12/244	7.92419e-07	3.39744e-06	0	0	6.0344	84.7723	ITGB1;JUN;H1F0;PLAU;CFL1;TXNIP;P4HB;ATP1B1;EEF2;SLC38A2;CTGF;TGM2
Emetine-1 mg/kg in Saline-Rat-Kidney-3d-dn	14/340	7.95471e-07	3.40867e-06	0	0	5.05233	70.9566	TRAM1;NPM1;RPL10;RPL23;RPS6;PLOD2;ATP1B1;LDHA;H1F0;RPS19;PLAU;SPP1;P4HB;SLC38A2
Acemetacin-2 mg/kg in Corn Oil-Rat-Liver-1d-up	13/291	8.06127e-07	3.45245e-06	0	0	5.48142	76.9099	HSPA8;NQO1;RPL10;RPS6;RPS3A;EEF2;VEGFA;FADS2;RPS19;PSAT1;FTH1;SLC38A2;TPT1
Chlorobenzene-500 mg/kg in CMC-Rat-Kidney-5d-dn	13/291	8.06127e-07	3.45057e-06	0	0	5.48142	76.9099	RPS6;PLOD2;YBX1;ATP1B1;LDHA;H1F0;PSAT1;SPP1;TXNIP;P4HB;SLC38A2;CALM2;TGM2
Ethinylestradiol-10 mg/kg in Corn Oil-Rat-Liver-0.25d-up	13/291	8.06127e-07	3.4487e-06	0	0	5.48142	76.9099	HSPA8;NPM1;RPL10;RPL23;RPS6;RPS3A;TUBA1B;RPS19;PLAU;FTH1;TXNIP;RPS20;P4HB
Famciclovir-112 mg/kg in Saline-Rat-Bone marrow-1d-dn	13/291	8.06127e-07	3.44683e-06	0	0	5.48142	76.9099	NPM1;RPS3A;NAP1L1;YBX1;H1F0;TUBA1B;CFL1;PGK1;LCN2;RPS20;VIM;CALM2;TPT1
Iproniazid-46 mg/kg in Water-Rat-Heart-3d-dn	13/291	8.06127e-07	3.44496e-06	0	0	5.48142	76.9099	RPL10;RPL23;TPM1;RPS6;RPS3A;YBX1;EEF2;TUBA1B;RPS19;PGK1;VIM;SLC38A2;CALM2
Labetalol-250 uM in DMSO-Rat-Primary rat hepatocytes-0.67d-up	13/291	8.06127e-07	3.44309e-06	0	0	5.48142	76.9099	NPM1;RPL10;RPS6;ASNS;RPS3A;YBX1;CTGF;LDHA;RPS19;PSAT1;CFL1;RPS20;CALM2
Myrtecaine-140 mg/kg in Corn Oil-Rat-Heart-3d-dn	13/291	8.06127e-07	3.44122e-06	0	0	5.48142	76.9099	HSPA8;JUN;RPL23;TPM1;RPS3A;YBX1;CTGF;VEGFA;CFL1;PGK1;VIM;SLC38A2;TPT1
Norethindrone-75 mg/kg in Corn Oil-Rat-Liver-3d-up	13/291	8.06127e-07	3.43936e-06	0	0	5.48142	76.9099	NPM1;RPL10;RPL23;RPS6;RPS3A;EEF2;VEGFA;RPS19;PSAT1;FTH1;PGK1;RPS20;P4HB
Nystatin-134 mg/kg in Corn Oil-Rat-Liver-3d-up	13/291	8.06127e-07	3.4375e-06	0	0	5.48142	76.9099	HSPA8;NQO1;RPS3A;ATP1B1;EEF2;C3;FTH1;LCN2;TXNIP;VIM;P4HB;SLC38A2;TGM2
Oxaprozin-1500 mg/kg in CMC-Rat-Kidney-1d-up	13/291	8.06127e-07	3.43564e-06	0	0	5.48142	76.9099	HSPA8;GPX2;RPL10;RPL23;RPS6;LDHA;TUBA1B;RPS19;FTH1;RPS20;SLC38A2;TPT1;TGM2
Oxiconazole-1500 mg/kg in Corn Oil-Rat-Liver-5d-up	13/291	8.06127e-07	3.43378e-06	0	0	5.48142	76.9099	HSPA8;NQO1;ATP1B1;ICAM1;C3;LDHA;FASN;LCN2;RPS20;SLC38A2;CALM2;TPT1;TGM2
Roxarsone-11 mg/kg in Corn Oil-Rat-Kidney-3d-up	13/291	8.06127e-07	3.43192e-06	0	0	5.48142	76.9099	HSPA8;NQO1;NPM1;RPL10;RPS6;RPS3A;CTGF;PSAT1;FTH1;SPP1;TXNIP;VIM;CALM2
Cisapride-250 mg/kg in Corn Oil-Rat-Intestine-1d-dn	14/341	8.23737e-07	3.505e-06	0	0	5.03751	70.5726	HSPA8;GPX2;NPM1;RPL10;RPL23;YBX1;EEF2;H1F0;TUBA1B;RPS19;CFL1;RPS20;VIM;P4HB
Nabumetone-2500 mg/kg in Corn Oil-Rat-Kidney-1d-up	14/341	8.23737e-07	3.50311e-06	0	0	5.03751	70.5726	HSPA8;GPX2;RPL10;RPL23;IGFBP3;RPS6;RPS3A;ATP1B1;EEF2;VEGFA;LDHA;RPS19;PSAT1;VIM
Amoxicillin-1100 mg/kg in Water-Rat-Liver-5d-up	13/292	8.378e-07	3.56099e-06	0	0	5.46264	76.436	TRAM1;NPM1;RPL10;RPL23;RPS6;ICAM1;C3;RPS19;FTH1;FASN;PGK1;P4HB;SLC38A2
Angiotensin II Human-0.72 mg/kg in Saline-Rat-Heart-1d-up	13/292	8.378e-07	3.55907e-06	0	0	5.46264	76.436	ITGB1;NPM1;RPL10;RPL23;RPS6;VEGFA;RPS19;FTH1;LCN2;TXNIP;RPS20;CALM2;TGM2
Ciprofloxacin-72 mg/kg in Corn Oil-Rat-Liver-5d-dn	13/292	8.378e-07	3.55715e-06	0	0	5.46264	76.436	HSPA8;JUN;RPS6;ATP1B1;EEF2;C3;LDHA;FASN;PGK1;P4HB;SLC38A2;CALM2;RAI14
Cyproterone Acetate-2500 mg/kg in CMC-Rat-Liver-0.25d-dn	13/292	8.378e-07	3.55524e-06	0	0	5.46264	76.436	TRAM1;RPS3A;YBX1;ICAM1;VEGFA;C3;FADS2;FTH1;FASN;P4HB;CALM2;TPT1;TGM2
Diethylstilbestrol-2.8 mg/kg in Corn Oil-Rat-Kidney-1d-up	13/292	8.378e-07	3.55332e-06	0	0	5.46264	76.436	HSPA8;RPL23;RPS6;RPS3A;ATP1B1;RPS19;PSAT1;PSMD3;SPP1;TXNIP;RPS20;P4HB;RAI14
Doxorubicin-1 mg/kg in Saline-Rat-Kidney-5d-up	13/292	8.378e-07	3.55141e-06	0	0	5.46264	76.436	HSPA8;RPL23;IGFBP3;YBX1;ATP1B1;VEGFA;H1F0;PLAU;PSAT1;SPP1;TXNIP;P4HB;TGM2
Etidronate-1005 mg/kg in Water-Rat-Heart-1d-up	13/292	8.378e-07	3.5495e-06	0	0	5.46264	76.436	HSPA8;RPL23;TPM1;RPS6;RPS3A;YBX1;ATP1B1;EEF2;VEGFA;LDHA;RPS19;RPS20;VIM
Genistein-375 mg/kg in Corn Oil-Rat-Liver-0.25d-dn	13/292	8.378e-07	3.54759e-06	0	0	5.46264	76.436	VEGFA;C3;LDHA;H1F0;PLAU;FTH1;FASN;PGK1;TXNIP;P4HB;SLC38A2;TPT1;RAI14
Ketoconazole-25 mg/kg in Corn Oil-Rat-Liver-1d-dn	13/292	8.378e-07	3.54568e-06	0	0	5.46264	76.436	RPL10;IGFBP3;RPS3A;YBX1;ICAM1;C3;LDHA;TUBA1B;FTH1;CFL1;P4HB;SLC38A2;TGM2
Lovastatin-1500 mg/kg in Corn Oil-Rat-Liver-5d-up	13/292	8.378e-07	3.54378e-06	0	0	5.46264	76.436	GPX2;NPM1;RPL23;RPS6;FADS2;LDHA;FTH1;FASN;CFL1;LCN2;RPS20;TPT1;RAI14
NN-Dimethylformamide-140 mg/kg in Saline-Rat-Liver-1d-dn	13/292	8.378e-07	3.54188e-06	0	0	5.46264	76.436	RPL10;RPL23;ICAM1;VEGFA;C3;FADS2;LDHA;H1F0;FTH1;TXNIP;RPS20;CALM2;TPT1
Nimesulide-61.7 uM in DMSO-Rat-Primary rat hepatocytes-0.67d-up	13/292	8.378e-07	3.53998e-06	0	0	5.46264	76.436	NPM1;RPL10;RPS6;ASNS;CTGF;VEGFA;LDHA;PSAT1;PGK1;LCN2;P4HB;SLC38A2;TGM2
Pravastatin-1200 mg/kg in Corn Oil-Rat-Kidney-3d-up	13/292	8.378e-07	3.53808e-06	0	0	5.46264	76.436	ITGB1;NPM1;RPL10;CTGF;AKAP12;LDHA;H1F0;PSAT1;SPP1;TXNIP;P4HB;SLC38A2;TGM2
Safrole-488 mg/kg in Corn Oil-Rat-Liver-3d-up	13/292	8.378e-07	3.53618e-06	0	0	5.46264	76.436	ABCC3;HSPA8;NQO1;JUN;GPX2;NPM1;EEF2;ICAM1;RPS19;FTH1;PSMD3;SLC38A2;TPT1
Carboplatin-5 mg/kg in Saline-Rat-Kidney-14d-up	14/342	8.529e-07	3.59799e-06	0	0	5.02278	70.1915	HSPA8;TRAM1;GPX2;RPS3A;ATP1B1;EEF2;LDHA;TUBA1B;RPS19;FTH1;PGK1;SLC38A2;CALM2;TPT1
Cephalexin-2500 mg/kg in CMC-Rat-Kidney-5d-up	14/342	8.529e-07	3.59606e-06	0	0	5.02278	70.1915	NPM1;RPL10;IGFBP3;RPS6;ATP1B1;EEF2;RPS19;PSAT1;PGK1;RPS20;P4HB;SLC38A2;CALM2;TPT1
Ergocalciferol-15 mg/kg in CMC-Rat-Liver-1d-up	13/293	8.7058e-07	3.66864e-06	0	0	5.444	75.9662	JUN;TRAM1;NPM1;RPL23;RPS3A;ATP1B1;EEF2;LDHA;FASN;CFL1;P4HB;SLC38A2;TPT1
Gemfibrozil-100 mg/kg in Corn Oil-Rat-Liver-1d-up	13/293	8.7058e-07	3.66668e-06	0	0	5.444	75.9662	HSPA8;NPM1;STAT1;RPL23;RPS6;EEF2;ICAM1;FADS2;RPS19;FASN;RPS20;TPT1;RAI14
Oxytetracycline-1500 mg/kg in Water-Rat-Liver-1d-dn	13/293	8.7058e-07	3.66472e-06	0	0	5.444	75.9662	NQO1;NPM1;RPL23;YBX1;ICAM1;C3;LDHA;TUBA1B;RPS19;FTH1;PGK1;P4HB;TPT1
Sotalol-6666 uM in DMSO-Rat-Primary rat hepatocytes-0.67d-up	13/293	8.7058e-07	3.66276e-06	0	0	5.444	75.9662	HSPA8;NPM1;RPL10;RPS6;ASNS;RPS3A;ATP1B1;LDHA;PSAT1;PGK1;P4HB;SLC38A2;CALM2
Valsartan-30 mg/kg in Corn Oil-Rat-Heart-0.25d-dn	13/293	8.7058e-07	3.66081e-06	0	0	5.444	75.9662	RPL10;RPL23;TPM1;RPS6;RPS3A;ATP1B1;VEGFA;LDHA;RPS19;FTH1;PGK1;VIM;SLC38A2
Tretinoin-156 uM in DMSO-Rat-Primary rat hepatocytes-1d-dn	14/343	8.82986e-07	3.71099e-06	0	0	5.00814	69.8132	ITGB1;JUN;NPM1;RPL10;RPS6;RPS3A;YBX1;CTGF;RPS19;FTH1;CFL1;PGK1;CALM2;TGM2
Emetine-1 mg/kg in Saline-Rat-Kidney-1d-up	12/247	9.01568e-07	3.78707e-06	0	0	5.9611	82.9734	HSPA8;JUN;H1F0;RPS19;FTH1;CFL1;TXNIP;ATP1B1;EEF2;SLC38A2;CTGF;VEGFA
1-Naphthyl Isothiocyanate-30 mg/kg in Corn Oil-Rat-Bone marrow-1d-dn	13/294	9.045e-07	3.79736e-06	0	0	5.42548	75.5004	RPL10;RPL23;RPS6;RPS3A;YBX1;RPS19;FTH1;CFL1;LCN2;RPS20;VIM;CALM2;TPT1
Chlorambucil-4.5 mg/kg in Corn Oil-Rat-Bone marrow-5d-dn	13/294	9.045e-07	3.79533e-06	0	0	5.42548	75.5004	NPM1;RPL10;RPL23;RPS6;RPS3A;LDHA;H1F0;RPS19;FTH1;CFL1;LCN2;TXNIP;CALM2
Clotrimazole-89 mg/kg in Corn Oil-Rat-Liver-5d-up	13/294	9.045e-07	3.79331e-06	0	0	5.42548	75.5004	ABCC3;NQO1;TRAM1;NPM1;RPL23;RPS3A;ICAM1;VEGFA;RPS19;PLAU;RPS20;CALM2;TPT1
Hydroquinone-800 mg/kg in CMC-Rat-Kidney-3d-up	13/294	9.045e-07	3.79129e-06	0	0	5.42548	75.5004	ITGB1;HSPA8;TRAM1;RPL23;RPS3A;ATP1B1;VEGFA;LDHA;RPS19;CFL1;SPP1;P4HB;TPT1
Tamoxifen-37.5 uM in DMSO-Rat-Primary rat hepatocytes-0.67d-up	13/294	9.045e-07	3.78928e-06	0	0	5.42548	75.5004	HSPA8;GPX2;NPM1;ASNS;RPS3A;LDHA;RPS19;PSAT1;FTH1;CFL1;LCN2;RPS20;SLC38A2
Cytarabine-23 mg/kg in Saline-Rat-Spleen-0.25d-up	14/344	9.1402e-07	3.82712e-06	0	0	4.99358	69.4378	NPM1;RPL10;RPS6;ASNS;ATP1B1;EEF2;LDHA;TUBA1B;FTH1;CFL1;PGK1;VIM;P4HB;CALM2
Altretamine-13 mg/kg in Corn Oil-Rat-Bone marrow-3d-dn	13/295	9.39593e-07	3.93211e-06	0	0	5.40709	75.0386	ITGB1;RPL10;RPL23;RPS3A;YBX1;EEF2;TUBA1B;FTH1;CFL1;LCN2;RPS20;CALM2;TPT1
Crotamiton-750 mg/kg in Corn Oil-Rat-Liver-5d-dn	13/295	9.39593e-07	3.93003e-06	0	0	5.40709	75.0386	HSPA8;JUN;TRAM1;IGFBP3;EEF2;VEGFA;FADS2;LDHA;H1F0;TUBA1B;FTH1;FASN;TXNIP
Gadopentetate Dimeglumine-125 mg/kg in Saline-Rat-Kidney-3d-dn	13/295	9.39593e-07	3.92794e-06	0	0	5.40709	75.0386	HSPA8;NPM1;RPL10;YBX1;LDHA;CFL1;PGK1;SPP1;TXNIP;P4HB;SLC38A2;CALM2;TPT1
Ifosfamide-143 mg/kg in Saline-Rat-Spleen-1d-up	13/295	9.39593e-07	3.92586e-06	0	0	5.40709	75.0386	NPM1;RPL10;RPS6;YBX1;EEF2;VEGFA;RPS19;FTH1;CFL1;TXNIP;RPS20;P4HB;CALM2
Ketoconazole-227 mg/kg in Corn Oil-Rat-Liver-3d-up	13/295	9.39593e-07	3.92377e-06	0	0	5.40709	75.0386	TRAM1;NPM1;RPL10;RPL23;RPS6;ICAM1;TUBA1B;RPS19;LCN2;TXNIP;RPS20;P4HB;RAI14
Losartan-1000 mg/kg in Water-Rat-Heart-3d-dn	13/295	9.39593e-07	3.92169e-06	0	0	5.40709	75.0386	ITGB1;RPL23;VEGFA;LDHA;TUBA1B;FTH1;PGK1;RPS20;VIM;P4HB;SLC38A2;TPT1;RAI14
Oxaliplatin-1.31 mg/kg in Saline-Rat-Bone marrow-0.25d-up	13/295	9.39593e-07	3.91962e-06	0	0	5.40709	75.0386	RPL10;RPL23;RPS6;EEF2;TUBA1B;RPS19;FTH1;CFL1;LCN2;TXNIP;VIM;CALM2;TPT1
Sulfadoxine-380 mg/kg in Corn Oil-Rat-Liver-1d-up	13/295	9.39593e-07	3.91754e-06	0	0	5.40709	75.0386	HSPA8;NQO1;RPL23;RPS6;YBX1;EEF2;TUBA1B;RPS19;CFL1;PSMD3;PGK1;RPS20;CALM2
Sulindac-64 mg/kg in Corn Oil-Rat-Liver-3d-dn	13/295	9.39593e-07	3.91547e-06	0	0	5.40709	75.0386	RPL10;RPL23;RPS3A;EEF2;ICAM1;VEGFA;C3;LDHA;FTH1;CFL1;PGK1;CALM2;TPT1
N-Nitrosodiethylamine-1.67 mg/kg in Saline-Rat-Spleen-3d-dn	12/248	9.40805e-07	3.91845e-06	0	0	5.93707	82.3859	LDHA;RPL10;CFL1;RPS6;PGK1;TXNIP;RPS3A;YBX1;VIM;EEF2;CALM2;TPT1
Caffeine-93 mg/kg in Water-Rat-Heart-3d-dn	14/345	9.46029e-07	3.93812e-06	0	0	4.97911	69.0651	RPL10;RPL23;TPM1;RPS6;RPS3A;ATP1B1;LDHA;TUBA1B;RPS19;CFL1;PGK1;VIM;SLC38A2;CALM2
Clotrimazole-89 mg/kg in Corn Oil-Rat-Liver-1d-dn	14/345	9.46029e-07	3.93604e-06	0	0	4.97911	69.0651	NPM1;RPL10;RPS6;RPS3A;C3;LDHA;FTH1;FASN;PGK1;TXNIP;P4HB;CALM2;TPT1;RAI14
Rofecoxib-111 uM in DMSO-Rat-Primary rat hepatocytes-0.67d-up	15/398	9.64795e-07	4.012e-06	0	0	4.62435	64.0535	ITGB1;HSPA8;NQO1;NPM1;ANXA2;RPL23;RPS6;RPS3A;YBX1;CTGF;VEGFA;LDHA;TUBA1B;CFL1;TPT1
Celecoxib-400 mg/kg in Corn Oil-Rat-Liver-5d-up	13/296	9.75897e-07	4.05602e-06	0	0	5.38882	74.5808	ABCC3;NQO1;TRAM1;ASNS;ICAM1;C3;FTH1;CFL1;PGK1;LCN2;TXNIP;P4HB;TGM2
Cholic Acid-1402 mg/kg in Water-Rat-Liver-3d-up	13/296	9.75897e-07	4.05388e-06	0	0	5.38882	74.5808	TRAM1;NPM1;RPL10;RPS6;ATP1B1;FADS2;LDHA;H1F0;TUBA1B;RPS19;FTH1;SLC38A2;CALM2
Disulfiram-100 mg/kg in Water-Rat-Liver-1d-up	13/296	9.75897e-07	4.05175e-06	0	0	5.38882	74.5808	HSPA8;NQO1;NPM1;RPL10;RPL23;RPS6;RPS3A;LDHA;TUBA1B;RPS19;PGK1;RPS20;P4HB
Epirubicin-2.7 mg/kg in Saline-Rat-Liver-5d-dn	13/296	9.75897e-07	4.04961e-06	0	0	5.38882	74.5808	NPM1;RPL10;RPL23;RPS6;RPS3A;EEF2;ICAM1;FADS2;LDHA;RPS19;FASN;RPS20;CALM2
Levamisole-120 mg/kg in Water-Rat-Liver-1d-up	13/296	9.75897e-07	4.04748e-06	0	0	5.38882	74.5808	HSPA8;NQO1;NPM1;RPL10;RPL23;RPS3A;ATP1B1;ICAM1;VEGFA;CFL1;P4HB;SLC38A2;TPT1
Prednisolone-184 mg/kg in Water-Rat-Kidney-3d-up	13/296	9.75897e-07	4.04535e-06	0	0	5.38882	74.5808	HSPA8;JUN;NPM1;RPL10;IGFBP3;ATP1B1;LDHA;PLAU;FTH1;TXNIP;P4HB;TPT1;TGM2
Raloxifene-5 mg/kg in Corn Oil-Rat-Liver-1d-up	13/296	9.75897e-07	4.04322e-06	0	0	5.38882	74.5808	HSPA8;NPM1;RPL10;RPL23;RPS6;RPS3A;EEF2;RPS19;PLAU;TXNIP;RPS20;TPT1;RAI14
Sertraline-210 mg/kg in Corn Oil-Rat-Liver-5d-dn	13/296	9.75897e-07	4.0411e-06	0	0	5.38882	74.5808	TRAM1;RPL23;RPS6;RPS3A;EEF2;C3;FADS2;LDHA;H1F0;RPS19;PLAU;FTH1;TPT1
Nystatin-134 mg/kg in Corn Oil-Rat-Kidney-5d-up	14/346	9.79038e-07	4.05197e-06	0	0	4.96472	68.6952	JUN;RPL10;RPL23;RPS6;ATP1B1;EEF2;CTGF;LDHA;TUBA1B;PLAU;PGK1;RPS20;P4HB;TPT1
Digitonin-75 mg/kg in Corn Oil-Rat-Heart-3d-dn	12/249	9.8155e-07	4.06024e-06	0	0	5.91322	81.8043	ITGB1;LDHA;FTH1;RPL23;PGK1;TXNIP;YBX1;VIM;ATP1B1;SLC38A2;TPT1;VEGFA
4-Chloroaniline-75 mg/kg in CMC-Rat-Kidney-5d-up	13/297	1.01345e-06	4.18997e-06	0	0	5.37068	74.127	HSPA8;NPM1;RPL23;RPS3A;CTGF;LDHA;FTH1;LCN2;TXNIP;RPS20;ITGAV;TPT1;TGM2
Acemetacin-2 mg/kg in Corn Oil-Rat-Liver-3d-dn	13/297	1.01345e-06	4.18778e-06	0	0	5.37068	74.127	TRAM1;RPL10;RPL23;IGFBP3;RPS6;ICAM1;PLAU;FASN;PGK1;RPS20;P4HB;TPT1;RAI14
Azathioprine-20 mg/kg in Corn Oil-Rat-Bone marrow-0.25d-dn	13/297	1.01345e-06	4.18558e-06	0	0	5.37068	74.127	NPM1;RPL10;RPL23;RPS6;LDHA;TUBA1B;RPS19;CFL1;PSMD3;PGK1;RPS20;P4HB;CALM2
Doxorubicin-4 mg/kg in Saline-Rat-Heart-5d-up	13/297	1.01345e-06	4.18339e-06	0	0	5.37068	74.127	HSPA8;YBX1;VEGFA;LDHA;TUBA1B;RPS19;FTH1;PGK1;TXNIP;RPS20;VIM;P4HB;CALM2
Lomefloxacin-2000 mg/kg in CMC-Rat-Liver-5d-up	13/297	1.01345e-06	4.18119e-06	0	0	5.37068	74.127	TRAM1;NPM1;RPL10;RPL23;RPS6;ICAM1;VEGFA;C3;RPS19;FTH1;RPS20;CALM2;TPT1
Metoclopramide-185 mg/kg in CMC-Rat-Heart-5d-dn	13/297	1.01345e-06	4.17901e-06	0	0	5.37068	74.127	HSPA8;RPS3A;EEF2;VEGFA;LDHA;RPS19;FTH1;CFL1;PGK1;RPS20;VIM;SLC38A2;TGM2
Miconazole-200 mg/kg in Corn Oil-Rat-Liver-1d-dn	13/297	1.01345e-06	4.17682e-06	0	0	5.37068	74.127	HSPA8;TRAM1;RPL10;RPL23;IGFBP3;ATP1B1;VEGFA;LDHA;FASN;PGK1;P4HB;SLC38A2;TPT1
NN-Dimethylformamide-140 mg/kg in Saline-Rat-Bone marrow-0.25d-dn	13/297	1.01345e-06	4.17463e-06	0	0	5.37068	74.127	NPM1;RPL23;YBX1;EEF2;FTH1;CFL1;PGK1;SPP1;TXNIP;RPS20;VIM;CALM2;TPT1
Phenacemide-400 mg/kg in CMC-Rat-Heart-5d-dn	13/297	1.01345e-06	4.17245e-06	0	0	5.37068	74.127	ITGB1;RPL10;TPM1;RPS6;ATP1B1;VEGFA;LDHA;TUBA1B;FTH1;PGK1;VIM;P4HB;CALM2
Quetiapine-500 mg/kg in CMC-Rat-Liver-3d-dn	13/297	1.01345e-06	4.17027e-06	0	0	5.37068	74.127	RPL23;IGFBP3;RPS3A;YBX1;ICAM1;VEGFA;C3;LDHA;FTH1;FASN;PGK1;RPS20;TPT1
Simvastatin-1200 mg/kg in Corn Oil-Rat-Liver-0.25d-up	13/297	1.01345e-06	4.16809e-06	0	0	5.37068	74.127	HSPA8;NQO1;RPL10;RPL23;RPS6;RPS3A;ICAM1;C3;LDHA;PSAT1;TXNIP;SLC38A2;RAI14
Ticrynafen-570 mg/kg in CMC-Rat-Liver-5d-dn	13/297	1.01345e-06	4.16592e-06	0	0	5.37068	74.127	HSPA8;JUN;IGFBP3;ATP1B1;ICAM1;VEGFA;LDHA;H1F0;FTH1;FASN;PGK1;TXNIP;RPS20
Carbon Tetrachloride-400 mg/kg in Corn Oil-Rat-Kidney-0.25d-dn	12/250	1.02385e-06	4.2065e-06	0	0	5.88957	81.2286	ITGB1;PSAT1;FTH1;RPL23;CFL1;YBX1;ATP1B1;EEF2;SLC38A2;TPT1;TGM2;VEGFA
6-Methoxy-2-Naphthylacetic Acid-360 mg/kg in Saline-Rat-Kidney-1d-up	14/348	1.04817e-06	4.30417e-06	0	0	4.93618	67.9636	TRAM1;NPM1;RPL23;RPS6;RPS3A;VEGFA;LDHA;RPS19;PSAT1;FTH1;PGK1;SPP1;RPS20;CALM2
Harringtonine-23 mg/kg in Saline-Rat-Bone marrow-3d-up	14/348	1.04817e-06	4.30193e-06	0	0	4.93618	67.9636	ITGB1;HSPA8;NPM1;RPL10;RPL23;ASNS;YBX1;LDHA;TUBA1B;RPS19;CFL1;PSMD3;P4HB;TPT1
Nabumetone-2500 mg/kg in Corn Oil-Rat-Kidney-3d-up	14/348	1.04817e-06	4.29969e-06	0	0	4.93618	67.9636	HSPA8;GPX2;RPL10;RPL23;RPS6;RPS3A;VEGFA;LDHA;RPS19;PSAT1;LCN2;SPP1;RPS20;VIM
Penciclovir-1200 mg/kg in Corn Oil-Rat-Bone marrow-1d-up	14/348	1.04817e-06	4.29745e-06	0	0	4.93618	67.9636	RPS3A;YBX1;LDHA;H1F0;RPS19;PSAT1;PSMD3;PGK1;LCN2;TXNIP;RPS20;VIM;CALM2;TPT1
Altretamine-13 mg/kg in Corn Oil-Rat-Bone marrow-1d-dn	13/298	1.05228e-06	4.31204e-06	0	0	5.35266	73.6769	ITGB1;HSPA8;RPL10;RPL23;RPS6;LDHA;TUBA1B;RPS19;FTH1;CFL1;PGK1;VIM;CALM2
Azaribine-750 mg/kg in CMC-Rat-Heart-1d-dn	13/298	1.05228e-06	4.3098e-06	0	0	5.35266	73.6769	HSPA8;RPL10;TPM1;RPS3A;EEF2;LDHA;TUBA1B;RPS19;PGK1;VIM;P4HB;CALM2;TPT1
Azathioprine-54 mg/kg in Water-Rat-Bone marrow-5d-up	13/298	1.05228e-06	4.30756e-06	0	0	5.35266	73.6769	HSPA8;RPL10;PLOD2;RPS3A;ATP1B1;LDHA;FTH1;CFL1;LCN2;SPP1;VIM;CALM2;TPT1
Fludrocortisone Acetate-125 mg/kg in CMC-Rat-Heart-5d-dn	13/298	1.05228e-06	4.30532e-06	0	0	5.35266	73.6769	RPL23;RPS3A;LOXL2;VEGFA;LDHA;RPS19;FTH1;CFL1;PGK1;RPS20;VIM;P4HB;TPT1
Granisetron-175 mg/kg in Water-Rat-Liver-5d-dn	13/298	1.05228e-06	4.30309e-06	0	0	5.35266	73.6769	HSPA8;JUN;EEF2;C3;FADS2;LDHA;FTH1;FASN;PSMD3;PGK1;P4HB;TPT1;RAI14
Ibuprofen-263 mg/kg in Corn Oil-Rat-Liver-1d-up	13/298	1.05228e-06	4.30085e-06	0	0	5.35266	73.6769	TRAM1;RPL23;EEF2;ICAM1;C3;FADS2;RPS19;PSAT1;FTH1;LCN2;RPS20;P4HB;TPT1
Lomustine-4.2 mg/kg in Corn Oil-Rat-Spleen-1d-dn	13/298	1.05228e-06	4.29862e-06	0	0	5.35266	73.6769	HSPA8;NPM1;RPL23;RPS6;RPS3A;NAP1L1;YBX1;RPS19;FTH1;CFL1;PGK1;VIM;CALM2
Pentobarbital-70 mg/kg in Water-Rat-Liver-1d-up	13/298	1.05228e-06	4.29639e-06	0	0	5.35266	73.6769	TRAM1;RPL23;RPS3A;ICAM1;C3;FADS2;TUBA1B;RPS19;FTH1;PSMD3;RPS20;CALM2;RAI14
Rosiglitazone-1800 mg/kg in Corn Oil-Rat-Liver-1d-up	13/298	1.05228e-06	4.29417e-06	0	0	5.35266	73.6769	ABCC3;HSPA8;NQO1;GPX2;NPM1;RPS3A;NAP1L1;EEF2;PLAU;PSAT1;FTH1;PSMD3;RPS20
Salicylic Acid-223 mg/kg in Corn Oil-Rat-Liver-3d-dn	13/298	1.05228e-06	4.29194e-06	0	0	5.35266	73.6769	JUN;RPS3A;YBX1;ICAM1;VEGFA;C3;FADS2;TUBA1B;FTH1;CFL1;PGK1;P4HB;TPT1
Sodium Arsenite-10 mg/kg in Saline-Rat-Liver-3d-dn	13/298	1.05228e-06	4.28972e-06	0	0	5.35266	73.6769	HSPA8;NQO1;NPM1;RPS3A;ATP1B1;ICAM1;VEGFA;C3;LDHA;PLAU;TXNIP;CALM2;TPT1
Terfenadine-750 mg/kg in CMC-Rat-Heart-5d-dn	13/298	1.05228e-06	4.2875e-06	0	0	5.35266	73.6769	HSPA8;TPM1;EEF2;CTGF;VEGFA;LDHA;TUBA1B;FTH1;PGK1;P4HB;SLC38A2;TPT1;TGM2
1-Naphthyl Isothiocyanate-30 mg/kg in Corn Oil-Rat-Kidney-0.25d-dn	12/251	1.06776e-06	4.34835e-06	0	0	5.86611	80.6586	ITGB1;NPM1;RPL10;PSAT1;CFL1;PGK1;SPP1;RPS20;YBX1;P4HB;ATP1B1;CALM2
Fenofibrate-215 mg/kg in Corn Oil-Rat-Kidney-5d-up	14/349	1.08435e-06	4.41362e-06	0	0	4.92204	67.6019	NPM1;RPL10;RPL23;RPS6;RPS3A;EEF2;VEGFA;LDHA;RPS19;FTH1;SPP1;RPS20;CALM2;TPT1
Azauridine-1500 mg/kg in CMC-Rat-Bone marrow-5d-up	13/299	1.09243e-06	4.44421e-06	0	0	5.33476	73.2307	HSPA8;TRAM1;NPM1;RPL10;LDHA;TUBA1B;RPS19;PSMD3;PGK1;LCN2;RPS20;P4HB;SLC38A2
Bisphenol A-100 mg/kg in Corn Oil-Rat-Bone marrow-1d-dn	13/299	1.09243e-06	4.44192e-06	0	0	5.33476	73.2307	ITGB1;HSPA8;RPS3A;NAP1L1;YBX1;EEF2;AKAP12;CFL1;LCN2;VIM;P4HB;CALM2;TPT1
Carvedilol-20 mg/kg in Corn Oil-Rat-Heart-1d-up	13/299	1.09243e-06	4.43963e-06	0	0	5.33476	73.2307	JUN;RPL10;RPS3A;CTGF;TUBA1B;FTH1;PSMD3;TXNIP;P4HB;SLC38A2;TPT1;TGM2;RAI14
Econazole-334 mg/kg in Corn Oil-Rat-Liver-1d-dn	13/299	1.09243e-06	4.43734e-06	0	0	5.33476	73.2307	HSPA8;RPL10;IGFBP3;RPS6;RPS3A;YBX1;EEF2;C3;FADS2;LDHA;FASN;PGK1;P4HB
Finasteride-800 mg/kg in Corn Oil-Rat-Liver-3d-dn	13/299	1.09243e-06	4.43505e-06	0	0	5.33476	73.2307	HSPA8;JUN;RPL10;IGFBP3;RPS6;RPS3A;EEF2;LDHA;FTH1;PGK1;P4HB;CALM2;TPT1
Haloperidol-21 mg/kg in Corn Oil-Rat-Heart-3d-up	13/299	1.09243e-06	4.43276e-06	0	0	5.33476	73.2307	JUN;RPL10;RPS3A;ATP1B1;CPLX2;CTGF;LDHA;TXNIP;RPS20;VIM;SLC38A2;CALM2;TGM2
Itraconazole-1093 mg/kg in Corn Oil-Rat-Liver-1d-up	13/299	1.09243e-06	4.43048e-06	0	0	5.33476	73.2307	HSPA8;NQO1;NPM1;RPS6;ASNS;RPS3A;VEGFA;RPS19;PLAU;PSAT1;PSMD3;RPS20;TPT1
Lisinopril-2000 mg/kg in CMC-Rat-Kidney-3d-up	13/299	1.09243e-06	4.4282e-06	0	0	5.33476	73.2307	HSPA8;JUN;NPM1;RPL10;IGFBP3;CTGF;VEGFA;FTH1;CFL1;RPS20;P4HB;SLC38A2;TPT1
Nimetazepam-122 mg/kg in CMC-Rat-Liver-1d-up	13/299	1.09243e-06	4.42592e-06	0	0	5.33476	73.2307	NQO1;RPL10;RPS6;RPS3A;EEF2;LDHA;RPS19;FTH1;CFL1;PSMD3;PGK1;TPT1;TGM2
Rofecoxib-1550 mg/kg in Corn Oil-Rat-Liver-1d-up	13/299	1.09243e-06	4.42365e-06	0	0	5.33476	73.2307	NQO1;TRAM1;YBX1;EEF2;ICAM1;C3;TUBA1B;RPS19;PSMD3;PGK1;TXNIP;RPS20;CALM2
Aceclofenac-1 mg/kg in Corn Oil-Rat-Kidney-1d-dn	12/252	1.11334e-06	4.50598e-06	0	0	5.84283	80.0944	TUBA1B;RPS19;PLAU;PSAT1;FTH1;RPL23;CFL1;ATP1B1;EEF2;SLC38A2;CALM2;VEGFA
Camptothecin-2.5 mg/kg in Saline-Rat-Bone marrow-1d-up	14/350	1.12165e-06	4.53729e-06	0	0	4.90798	67.2428	HSPA8;TRAM1;NPM1;RPL10;RPL23;YBX1;EEF2;LDHA;RPS19;CFL1;PSMD3;SPP1;P4HB;TPT1
1-Naphthyl Isothiocyanate-60 mg/kg in Corn Oil-Rat-Kidney-3d-up	13/300	1.13395e-06	4.58468e-06	0	0	5.31697	72.7883	HSPA8;GPX2;RPL10;RPL23;RPS6;RPS3A;ATP1B1;CTGF;VEGFA;FTH1;TXNIP;RPS20;RAI14
Amiodarone-147 mg/kg in CMC-Rat-Kidney-3d-dn	13/300	1.13395e-06	4.58233e-06	0	0	5.31697	72.7883	HSPA8;JUN;YBX1;ATP1B1;CTGF;LDHA;TUBA1B;FTH1;CFL1;PGK1;VIM;SLC38A2;TGM2
Catechol-195 mg/kg in Saline-Rat-Kidney-3d-dn	13/300	1.13395e-06	4.57998e-06	0	0	5.31697	72.7883	NPM1;RPL10;RPL23;RPS6;EEF2;H1F0;RPS19;PLAU;CFL1;PGK1;P4HB;TPT1;TGM2
Clomiphene-250 mg/kg in CMC-Rat-Liver-5d-dn	13/300	1.13395e-06	4.57763e-06	0	0	5.31697	72.7883	NPM1;FADS2;LDHA;H1F0;RPS19;FTH1;FASN;CFL1;PGK1;RPS20;P4HB;SLC38A2;TPT1
Crotamiton-750 mg/kg in Corn Oil-Rat-Liver-1d-dn	13/300	1.13395e-06	4.57529e-06	0	0	5.31697	72.7883	TRAM1;RPL10;IGFBP3;ICAM1;C3;FADS2;LDHA;H1F0;PLAU;FASN;TXNIP;TPT1;RAI14
Cyproterone Acetate-2500 mg/kg in CMC-Rat-Liver-1d-up	13/300	1.13395e-06	4.57294e-06	0	0	5.31697	72.7883	ABCC3;HSPA8;NQO1;GPX2;NPM1;RPL23;RPS3A;TUBA1B;RPS19;PSAT1;PSMD3;PGK1;TPT1
Cytarabine-487 mg/kg in Saline-Rat-Liver-0.25d-up	13/300	1.13395e-06	4.5706e-06	0	0	5.31697	72.7883	HSPA8;RPL10;RPS6;RPS3A;YBX1;ICAM1;C3;LDHA;PLAU;FTH1;CFL1;SLC38A2;TPT1
Econazole-334 mg/kg in Corn Oil-Rat-Liver-5d-dn	13/300	1.13395e-06	4.56827e-06	0	0	5.31697	72.7883	HSPA8;RPL10;RPL23;IGFBP3;ATP1B1;FADS2;LDHA;H1F0;TUBA1B;FASN;PGK1;P4HB;SLC38A2
Etoposide-188 mg/kg in Corn Oil-Rat-Bone marrow-1d-up	13/300	1.13395e-06	4.56593e-06	0	0	5.31697	72.7883	HSPA8;NPM1;RPS3A;YBX1;IFIT2;LDHA;RPS19;FTH1;LCN2;TXNIP;RPS20;VIM;RAI14
Fenofibrate-215 mg/kg in Corn Oil-Rat-Liver-5d-up	13/300	1.13395e-06	4.5636e-06	0	0	5.31697	72.7883	HSPA8;NPM1;RPL10;RPL23;RPS6;RPS3A;NAP1L1;YBX1;ICAM1;LDHA;FTH1;TXNIP;TPT1
Lomustine-4.2 mg/kg in Corn Oil-Rat-Bone marrow-1d-dn	13/300	1.13395e-06	4.56127e-06	0	0	5.31697	72.7883	HSPA8;TRAM1;NPM1;RPL10;RPL23;RPS6;TUBA1B;RPS19;CFL1;PGK1;LCN2;VIM;CALM2
N-Nitrosodiethylamine-100 mg/kg in Saline-Rat-Liver-1d-up	13/300	1.13395e-06	4.55894e-06	0	0	5.31697	72.7883	HSPA8;NPM1;RPL10;RPL23;RPS6;ICAM1;LDHA;RPS19;FTH1;CFL1;RPS20;P4HB;TPT1
N-Nitrosodiethylamine-34 mg/kg in Saline-Rat-Kidney-3d-dn	13/300	1.13395e-06	4.55661e-06	0	0	5.31697	72.7883	RPL10;YBX1;EEF2;H1F0;PLAU;PSAT1;FTH1;CFL1;PGK1;SPP1;CALM2;TPT1;TGM2
Nitrazepam-310 mg/kg in CMC-Rat-Liver-3d-dn	13/300	1.13395e-06	4.55429e-06	0	0	5.31697	72.7883	HSPA8;RPL23;YBX1;EEF2;ICAM1;C3;LDHA;FTH1;FASN;PGK1;RPS20;P4HB;TPT1
Penicillamine-100 mg/kg in Water-Rat-Liver-1d-up	13/300	1.13395e-06	4.55197e-06	0	0	5.31697	72.7883	NQO1;TRAM1;NPM1;RPL23;ICAM1;VEGFA;C3;RPS19;PLAU;CFL1;RPS20;CALM2;TPT1
Roflumilast-17 mg/kg in CMC-Rat-Liver-1d-up	13/300	1.13395e-06	4.54965e-06	0	0	5.31697	72.7883	ITGB1;NQO1;JUN;TRAM1;NPM1;STAT1;ICAM1;C3;H1F0;TUBA1B;TXNIP;SLC38A2;TPT1
Sulfathiazole-2629 mg/kg in Water-Rat-Liver-3d-dn	13/300	1.13395e-06	4.54733e-06	0	0	5.31697	72.7883	TRAM1;RPL10;RPL23;IGFBP3;VEGFA;LDHA;H1F0;RPS19;FASN;PGK1;TXNIP;P4HB;TPT1
Tetracycline-1500 mg/kg in Water-Rat-Liver-5d-up	13/300	1.13395e-06	4.54502e-06	0	0	5.31697	72.7883	NPM1;RPL10;RPL23;RPS6;YBX1;ATP1B1;ICAM1;C3;FTH1;FASN;RPS20;P4HB;SLC38A2
Tranexamic Acid-2000 mg/kg in CMC-Rat-Heart-3d-up	13/300	1.13395e-06	4.54271e-06	0	0	5.31697	72.7883	NPM1;RPL10;EEF2;VEGFA;LDHA;TUBA1B;RPS19;FTH1;CFL1;PSMD3;P4HB;TPT1;TGM2
Cytochalasin B-167 uM in DMSO-Rat-Primary rat hepatocytes-1d-dn	14/351	1.16009e-06	4.64507e-06	0	0	4.89399	66.8863	HSPA8;JUN;NPM1;RPS6;RPS3A;CTGF;LDHA;TUBA1B;CFL1;PSMD3;PGK1;LCN2;CALM2;TGM2
Niacin-2625 mg/kg in Water-Rat-Liver-5d-up	14/351	1.16009e-06	4.64271e-06	0	0	4.89399	66.8863	TRAM1;NPM1;RPL23;RPS6;RPS3A;ATP1B1;ICAM1;C3;LDHA;RPS19;PGK1;TXNIP;P4HB;CALM2
Mexiletine-350 mg/kg in CMC-Rat-Heart-3d-up	12/253	1.16062e-06	4.6425e-06	0	0	5.81973	79.5357	C3;JUN;FTH1;TPM1;RPS6;TXNIP;RPS20;RPS3A;EEF2;CTGF;TGM2;VEGFA
11-Dichloroethene-600 mg/kg in Water-Rat-Liver-5d-up	13/301	1.17686e-06	4.70505e-06	0	0	5.29931	72.3497	NQO1;JUN;RPS6;RPS3A;ICAM1;C3;FADS2;LDHA;RPS19;FASN;RPS20;P4HB;RAI14
Baclofen-6.6 mg/kg in CMC-Rat-Heart-5d-up	13/301	1.17686e-06	4.70267e-06	0	0	5.29931	72.3497	NPM1;RPL10;RPS6;EEF2;CTGF;VEGFA;TUBA1B;RPS19;CFL1;PGK1;TXNIP;VIM;SLC38A2
Clomipramine-115 mg/kg in Water-Rat-Liver-1d-dn	13/301	1.17686e-06	4.70028e-06	0	0	5.29931	72.3497	IGFBP3;FADS2;LDHA;H1F0;TUBA1B;RPS19;FASN;PSMD3;PGK1;TXNIP;RPS20;TPT1;RAI14
Cyclopropane Carboxylic Acid-375 mg/kg in Water-Rat-Liver-3d-dn	13/301	1.17686e-06	4.6979e-06	0	0	5.29931	72.3497	TRAM1;EEF2;C3;FADS2;LDHA;H1F0;RPS19;FTH1;FASN;PGK1;P4HB;CALM2;TGM2
Dexamethasone-1 mg/kg in Corn Oil-Rat-Liver-0.25d-up	13/301	1.17686e-06	4.69552e-06	0	0	5.29931	72.3497	HSPA8;NPM1;RPL23;RPS6;RPS3A;YBX1;ATP1B1;TUBA1B;RPS19;FTH1;P4HB;TPT1;RAI14
Diethylstilbestrol-280 mg/kg in Corn Oil-Rat-Bone marrow-5d-up	13/301	1.17686e-06	4.69314e-06	0	0	5.29931	72.3497	HSPA8;TRAM1;RPL10;RPS6;YBX1;PGK1;LCN2;SPP1;TXNIP;RPS20;VIM;CALM2;RAI14
Ipriflavone-1500 mg/kg in CMC-Rat-Liver-1d-up	13/301	1.17686e-06	4.69077e-06	0	0	5.29931	72.3497	HSPA8;NPM1;RPL10;RPS3A;EEF2;VEGFA;FADS2;LDHA;FTH1;CFL1;SLC38A2;CALM2;TPT1
NN-Dimethylformamide-140 mg/kg in Saline-Rat-Liver-3d-dn	13/301	1.17686e-06	4.68839e-06	0	0	5.29931	72.3497	HSPA8;RPL23;VEGFA;C3;FADS2;LDHA;H1F0;PGK1;LCN2;TXNIP;RPS20;TPT1;TGM2
Paroxetine-104 mg/kg in Water-Rat-Brain-3d-up	13/301	1.17686e-06	4.68602e-06	0	0	5.29931	72.3497	RPL23;RPS3A;ATP1B1;TUBA1B;RPS19;PSAT1;FTH1;PGK1;TXNIP;RPS20;VIM;TPT1;RAI14
Pirinixic Acid-364 mg/kg in CMC-Rat-Liver-3d-up	13/301	1.17686e-06	4.68366e-06	0	0	5.29931	72.3497	RPL23;RPS6;RPS3A;YBX1;EEF2;FADS2;LDHA;RPS19;FTH1;CFL1;PSMD3;PGK1;TPT1
Praziquantel-1200 mg/kg in CMC-Rat-Liver-3d-up	13/301	1.17686e-06	4.68129e-06	0	0	5.29931	72.3497	ABCC3;NQO1;GPX2;NPM1;RPL10;RPS6;RPS19;PSAT1;PSMD3;PGK1;P4HB;SLC38A2;CALM2
Prednisolone-184 mg/kg in Water-Rat-Liver-1d-dn	13/301	1.17686e-06	4.67893e-06	0	0	5.29931	72.3497	TRAM1;NPM1;RPL23;IGFBP3;RPS6;RPS3A;ICAM1;VEGFA;C3;FADS2;LDHA;FTH1;TXNIP
Sodium Arsenite-30 mg/kg in Saline-Rat-Liver-3d-up	13/301	1.17686e-06	4.67657e-06	0	0	5.29931	72.3497	ABCC3;NQO1;NPM1;RPS3A;ICAM1;VEGFA;FADS2;RPS19;PLAU;FTH1;RPS20;SLC38A2;RAI14
Sulfamethoxazole-1000 mg/kg in Water-Rat-Kidney-1d-up	13/301	1.17686e-06	4.67421e-06	0	0	5.29931	72.3497	ITGB1;TRAM1;RPL10;IGFBP3;RPS3A;YBX1;CFL1;PGK1;SPP1;SLC38A2;CALM2;TPT1;TGM2
Ticlopidine-223 mg/kg in CMC-Rat-Liver-3d-up	13/301	1.17686e-06	4.67185e-06	0	0	5.29931	72.3497	ABCC3;NQO1;RPL10;RPL23;RPS6;RPS3A;EEF2;FADS2;RPS19;PSAT1;FTH1;CFL1;P4HB
Sulfadiazine-1170 mg/kg in Water-Rat-Kidney-1d-up	14/352	1.1997e-06	4.76014e-06	0	0	4.88009	66.5324	ITGB1;TRAM1;NPM1;LDHA;H1F0;PLAU;PSAT1;CFL1;PGK1;SPP1;P4HB;SLC38A2;TPT1;TGM2
2-Nitroanisole-740 mg/kg in CMC-Rat-Kidney-1d-dn	13/302	1.22122e-06	4.84305e-06	0	0	5.28176	71.9147	RPL23;RPS6;ATP1B1;LDHA;H1F0;RPS19;PSAT1;FTH1;SPP1;RPS20;SLC38A2;CALM2;TGM2
Beta-Estradiol 3-Benzoate-0.25 mg/kg in Corn Oil-Rat-Liver-0.25d-dn	13/302	1.22122e-06	4.84062e-06	0	0	5.28176	71.9147	NQO1;RPL10;ICAM1;C3;FADS2;LDHA;H1F0;PLAU;FTH1;PGK1;TXNIP;RPS20;TGM2
Busulfan-3 mg/kg in Corn Oil-Rat-Bone marrow-0.25d-up	13/302	1.22122e-06	4.83818e-06	0	0	5.28176	71.9147	HSPA8;JUN;ANXA2;PLOD2;RPS3A;NAP1L1;YBX1;FTH1;LCN2;SPP1;RPS20;VIM;RAI14
Carboplatin-6 mg/kg in Saline-Rat-Liver-5d-dn	13/302	1.22122e-06	4.83575e-06	0	0	5.28176	71.9147	HSPA8;ANXA2;RPL10;IGFBP3;RPS6;RPS3A;YBX1;EEF2;C3;FADS2;H1F0;FTH1;PGK1
Choline Chloride-2550 mg/kg in Water-Rat-Liver-1d-up	13/302	1.22122e-06	4.83332e-06	0	0	5.28176	71.9147	HSPA8;RPL23;RPS6;RPS3A;YBX1;ATP1B1;ICAM1;VEGFA;C3;RPS20;VIM;CALM2;TPT1
Cimetidine-2000 mg/kg in CMC-Rat-Heart-3d-dn	13/302	1.22122e-06	4.83089e-06	0	0	5.28176	71.9147	RPL23;RPS6;RPS3A;YBX1;ATP1B1;EEF2;LDHA;FTH1;PGK1;RPS20;VIM;SLC38A2;TGM2
Cyclosporin A-350 mg/kg in Corn Oil-Rat-Liver-1d-up	13/302	1.22122e-06	4.82847e-06	0	0	5.28176	71.9147	TRAM1;RPL10;RPL23;ASNS;C3;FADS2;RPS19;PLAU;PSAT1;FTH1;TXNIP;RPS20;P4HB
Lovastatin-1500 mg/kg in Corn Oil-Rat-Kidney-5d-dn	13/302	1.22122e-06	4.82604e-06	0	0	5.28176	71.9147	ITGB1;JUN;YBX1;ATP1B1;PSAT1;FTH1;CFL1;PGK1;TXNIP;P4HB;SLC38A2;TPT1;TGM2
Methyl Methanesulfonate-113 mg/kg in Water-Rat-Bone marrow-1d-up	13/302	1.22122e-06	4.82362e-06	0	0	5.28176	71.9147	TRAM1;NPM1;RPL10;RPL23;LDHA;TUBA1B;RPS19;FTH1;CFL1;PGK1;SPP1;TXNIP;CALM2
N-Nitrosodiethylamine-1.67 mg/kg in Saline-Rat-Bone marrow-3d-up	13/302	1.22122e-06	4.82121e-06	0	0	5.28176	71.9147	ITGB1;NPM1;RPL23;RPS3A;NAP1L1;YBX1;EEF2;TUBA1B;RPS19;FTH1;CFL1;TPT1;RAI14
Norepinephrine-1.75 mg/kg in Saline-Rat-Heart-5d-up	13/302	1.22122e-06	4.81879e-06	0	0	5.28176	71.9147	ITGB1;HSPA8;NPM1;RPL10;PLOD2;VEGFA;LDHA;RPS19;SPP1;RPS20;VIM;CALM2;TGM2
Pentoxifylline-1170 mg/kg in CMC-Rat-Heart-1d-dn	13/302	1.22122e-06	4.81638e-06	0	0	5.28176	71.9147	HSPA8;RPL23;TPM1;ATP1B1;CTGF;VEGFA;LDHA;TUBA1B;RPS19;FTH1;SLC38A2;CALM2;TGM2
Sildenafil-300 mg/kg in Saline-Rat-Liver-3d-dn	13/302	1.22122e-06	4.81397e-06	0	0	5.28176	71.9147	HSPA8;TRAM1;RPL10;RPS6;RPS3A;ICAM1;VEGFA;C3;LDHA;FTH1;FASN;CALM2;TPT1
Cyclophosphamide-1320 uM in DMSO-Rat-Primary rat hepatocytes-1d-up	12/255	1.26057e-06	4.96662e-06	0	0	5.77409	78.4349	C3;HSPA8;LDHA;NPM1;FTH1;RPL23;PGK1;LCN2;YBX1;P4HB;EEF2;VEGFA
[truncated: 5,877 more rows]

## Sheet: Drug Perturbations from GEO dow
Term	Overlap	P-value	Adjusted P-value	Old P-value	Old Adjusted P-value	Odds Ratio	Combined Score	Genes
gatifloxacin 5379 human GSE9166 sample 2626	48/266	1.61213e-51	1.45576e-48	0	0	22.1412	2589.51	RPL4;TRAM1;RPL3;HSP90AB1;RPL12;PLOD2;ENO1;YBX1;RPL9;ACTB;ACTG1;CTGF;AKAP12;RPS4X;LDHA;TUBA1B;FTH1;TMSB4X;UBC;FLNB;SLC38A2;TGM2;IER3;FDPS;HSPA8;HSP90AA1;ANXA2;IGFBP3;TUBB;TXNRD1;TPM1;KRT8;AKR1C2;TUBB4B;YWHAZ;EEF1A1;AKR1B10;KRT18;PSAT1;ALDH1A1;RPS20;CALR;TGFBI;ALDOA;PPIA;TPT1;FTL;ATF4
atorvastatin DB01076 human GSE2450 sample 2484	46/250	1.02285e-49	4.61815e-47	0	0	22.5767	2546.74	HSP90AB1;SERPINE1;ENO1;YBX1;RPL9;ACTB;ACTG1;CTGF;AKAP12;LDHA;TUBA1B;RPS19;TMSB4X;UBC;ITGAV;SLC38A2;HSPA8;HSP90AA1;NPM1;TPI1;ANXA2;RPL23;TUBB;RPS6;CRIM1;HMGA1;RPS3A;NAP1L1;EEF2;TUBB4B;EEF1A1;MYL6;PKM;HNRNPA2B1;CALR;PABPC1;VIM;PFN1;ALDOA;RPL28;PPIA;CALM2;GAPDH;PTMA;RPS24;TPT1
bexarotene DB00307 human GSE12791 sample 2681	46/253	1.84022e-49	5.53907e-47	0	0	22.309	2503.44	RPL4;RPL3;RPL10;SERPINE1;AMIGO2;ENO1;YBX1;RPL9;ACTB;ACTG1;RPS4X;LDHA;TUBA1B;PGK1;FLNB;RPS27A;SLC38A2;IER3;HSPA8;NPM1;TPI1;S100A2;ANXA2;LAMB3;TXNRD1;KRT8;KRT7;ASNS;DHCR24;RPS3A;EEF2;VEGFA;EEF1A1;KRT19;KRT18;SCD;HNRNPA2B1;S100A6;PABPC1;VIM;PFN1;PPIA;GAPDH;RPS24;TPT1;ATF4
clinafloxacin 60063 human GSE9166 sample 2625	55/470	1.30464e-48	2.94523e-46	0	0	14.3584	1583.13	RPL4;TRAM1;RPL3;HSP90AB1;PLOD2;ENO1;ACTB;ACTG1;CTGF;AKAP12;TUBA1B;FTH1;CFL1;ITGAV;TGM2;IER3;ABCC3;HSP90AA1;TPI1;ANXA2;TUBB;TPM1;KRT8;ACTN4;NEAT1;YWHAZ;ALDH1A1;S100A6;PABPC1;PFN1;ALDOA;PPIA;PTMA;FTL;ATF4;RPL12;LDHA;FLNB;FDPS;HSPA8;TXNRD1;AKR1C2;EEF2;TUBB4B;AKR1B10;KRT18;PSAT1;HNRNPA2B1;RPS20;CALR;TGFBI;VIM;P4HB;CD24;TPT1
motexafin gadolinium (12 h) DB05428 human GSE2189 sample 3127	48/320	1.88733e-47	3.40853e-45	0	0	18.4049	1980.12	RPL4;KRT81;RPL10;AMIGO2;YBX1;RPL9;SAT1;ACTB;ACTG1;RPL7;RPS4X;LDHA;TUBA1B;RPS19;TMSB4X;CFL1;UBC;ITGAV;RPL37;RPS27A;HSPA8;HSP90AA1;NPM1;ANXA2;RPL23;IGFBP3;RPS6;ASNS;AKR1C2;RPS3A;ATP1B1;EEF1A1;H1F0;RPS27;AKR1B10;ALDH1A1;S100A6;RPS20;RPL26;PABPC1;VIM;PFN1;CD24;PPIA;GAPDH;RPS24;TPT1;FTL
BPDE 41322 human GSE19510 sample 3379	47/300	2.35748e-47	3.54801e-45	0	0	19.2229	2063.85	RPL4;TOP2A;RPL5;RPL3;RPL10;GSTP1;RPL12;SERPINE1;ENO1;YBX1;LOXL2;LDHA;TUBA1B;PLAU;FTH1;PGK1;HSPA8;HSP90AA1;NPM1;TPI1;IGFBP4;IGFBP3;TUBB;HMGA1;ASNS;ACTN4;TUBB4B;EIF1;SLC7A5;PKM;MTHFD2;PSAT1;DDIT4;S100A6;TXNIP;RPS20;CALR;TGFBI;VIM;P4HB;PFN1;ALDOA;PPIA;GAS5;GAPDH;PTMA;ATF4
trovafloxacin 62959 human GSE9166 sample 2629	53/459	1.97894e-46	2.55283e-44	0	0	14.1679	1490.98	RPL4;RPL5;TRAM1;RPL3;HSP90AB1;PLOD2;ENO1;SAT1;ACTB;ACTG1;CTGF;AKAP12;TUBA1B;ITGAV;TGM2;IER3;HSP90AA1;ANXA2;TUBB;TPM1;RPS6;KRT8;RPS3A;ACTN4;ATP1B1;YWHAZ;EEF1A1;ALDH1A1;S100A6;PABPC1;ALDOA;SQSTM1;PPIA;GAPDH;ATF4;RPL12;LDHA;PGK1;FLNB;HSPA8;TXNRD1;AKR1C2;DHCR24;EEF2;TUBB4B;AKR1B10;KRT18;PSAT1;RPS20;TGFBI;VIM;CALM2;TPT1
HYPOCHLOROUS ACID 24341 human GSE11630 sample 3199	40/204	2.84578e-44	3.21217e-42	0	0	24.0587	2412.32	RPL4;SERPINA3;RPL3;RPL10;RPL12;ACTB;ACTG1;C3;RPL7A;LDHA;RPS19;CFL1;UBC;PGK1;SLC38A2;S100A2;ANXA2;IGFBP3;RPS6;AKR1C2;RPS3A;EEF1A1;KRT19;RPS27;AKR1B10;PKM;KRT18;ALDH1A1;LCN2;TXNIP;RPS20;PABPC1;VIM;ALDOA;PPIA;CALM2;GAPDH;PTMA;RPS24;TPT1
trovafloxacin DB00685 human GSE9166 sample 3036	51/451	4.04858e-44	4.06208e-42	0	0	13.8751	1386.34	TRAM1;RPL3;HSP90AB1;PLOD2;RPL9;SAT1;ACTG1;TUBA1B;ITGAV;TGM2;IER3;ABCC3;HSP90AA1;ANXA2;IGFBP4;TUBB;TPM1;KRT8;ACTN4;ATP1B1;YWHAZ;DDIT4;ALDH1A1;S100A6;PABPC1;PFN1;ALDOA;SQSTM1;PTMA;ATF4;RPL12;C3;PGK1;SPP1;FLNB;SPTBN1;HSPA8;TXNRD1;DHCR24;EEF2;TUBB4B;AKR1B10;KRT18;PSAT1;HNRNPA2B1;RPS20;TGFBI;VIM;P4HB;CD24;CALM2
doxycycline DB00254 human GSE2624 sample 3077	48/391	3.82181e-43	3.45109e-41	0	0	15.0628	1471.19	ITGB1;RPL5;SERPINE1;AMIGO2;PLOD2;ENO1;SLC7A11;CTGF;RPL7;AKAP12;LDHA;STC2;TMSB4X;UBC;PGK1;RPL37;RPS27A;IER3;HSP90AA1;NPM1;S100A2;IGFBP4;RPL23;TPM1;RPS6;CRIM1;KRT7;RPS3A;NEAT1;EEF2;YWHAZ;EIF1;VEGFA;EEF1A1;SLC7A5;RPS27;MTHFD2;HNRNPA2B1;TXNIP;RPS20;TGFBI;VIM;CD24;CALM2;PTMA;RPS24;TPT1;ATF4
decitabine DB01262 human GSE29077 sample 2540	44/300	6.35125e-43	5.2138e-41	0	0	17.9959	1748.53	TOP2A;RPL5;TRAM1;RPL3;HSP90AB1;SERPINE1;AMIGO2;ENO1;SLC7A11;RPL7;TMSB4X;NAMPT;SPP1;PMEPA1;HSPA8;NQO1;G6PD;NPM1;IGFBP4;TUBB;TXNRD1;ASNS;AKR1C2;NAP1L1;EEF2;YWHAZ;EREG;EIF1;SLC7A5;H1F0;AKR1B10;CYP24A1;ASPH;MTHFD2;SCD;ALDH1A1;HNRNPA2B1;RPL26;TGFBI;PFN1;CD24;RPL28;PTMA;ATF4
HYPOCHLOROUS ACID 24341 human GSE11630 sample 3202	43/289	3.35269e-42	2.5229e-40	1	0	18.2563	1743.46	SERPINA3;RPL12;TNFAIP2;SAT1;CXCL5;IFIT2;ACTG1;ICAM1;CTGF;RPL7;RPS4X;RPL7A;RPS19;PLAU;UBC;ITGAV;RPL37;IER3;NPM1;S100A2;IGFBP3;TPM1;RPS6;RPS3A;EEF2;EEF1A1;NFKBIA;MYL6;KRT19;ALDH1A1;S100A6;TXNIP;RPS20;TGFBI;PABPC1;VIM;CD24;CALM2;GAPDH;PTMA;RPS24;TPT1;RAI14
grepafloxacin 72474 human GSE9166 sample 2627	51/495	4.77872e-42	3.31937e-40	2	0	12.6418	1202.79	RPL4;TRAM1;RPL3;SERPINE1;PLOD2;ENO1;ACTG1;CTGF;AKAP12;RPS4X;RPL7A;TUBA1B;FTH1;ITGAV;HSP90AA1;ANXA2;TUBB;TPM1;RPS6;KRT8;ACTN4;ATP1B1;YWHAZ;DDIT4;ALDH1A1;PABPC1;ALDOA;SQSTM1;PTMA;FTL;RPL10;RPL12;LDHA;PGK1;FLNB;SLC38A2;HSPA8;NPM1;TXNRD1;AKR1C2;DHCR24;EEF2;TUBB4B;AKR1B10;KRT18;PSAT1;RPS20;TGFBI;VIM;P4HB;CALM2
Ascorbyl-2-phosphate 54679073 human GSE11919 sample 3191	43/296	9.76858e-42	6.30073e-40	3	0	17.8246	1683.16	ITGB1;RPL5;SERPINE1;AMIGO2;PLOD2;ENO1;SLC7A11;RPL9;LOXL2;LDHA;RPS19;FTH1;STC2;PGK1;SLC38A2;EIF4B;HSPA8;NQO1;TPI1;STAT1;RPL23;IGFBP3;TXNRD1;TPM1;RPS6;CRIM1;RPS3A;NAP1L1;ACTN4;ATP1B1;EEF2;EIF1;VEGFA;RPS27;PKM;PSAT1;DDIT4;RPS20;RPL26;TGFBI;ALDOA;GAS5;GAPDH
cisplatin DB00515 human GSE6410 sample 2532	43/315	1.55142e-40	9.33956e-39	4	0	16.7494	1535.32	TOP2A;KRT81;HSP90AB1;RPL12;ENO1;SLC7A11;ACTB;ACTG1;AKAP12;LDHA;FLNB;IER3;EIF5A;ABCC3;HSPA8;ANXA2;IGFBP4;TUBB;TPM1;KRT8;KRT7;ACTN4;TUBB4B;YWHAZ;EREG;EIF1;EEF1A1;SLC7A5;H1F0;PKM;KRT18;ASPH;SCD;HNRNPA2B1;TGFBI;PABPC1;VIM;PFN1;ALDOA;SQSTM1;GAPDH;PTMA;ATF4
Bisphenol A 6623 human GSE17624 sample 2658	34/147	3.08742e-40	1.74246e-38	5	0	28.3794	2581.85	RPL3;RPL12;ENO1;YBX1;RPL9;ACTB;ACTG1;RPS4X;RPL7A;LDHA;TUBA1B;RPS19;CFL1;UBC;PGK1;TPI1;ANXA2;IGFBP3;TUBB;RPS6;RPS3A;TUBB4B;EEF1A1;KRT19;PKM;KRT18;DDIT4;S100A6;TXNIP;RPS20;ALDOA;PPIA;GAPDH;TPT1
pioglitazone DB01132 rat GSE21329 sample 2841	43/321	3.57394e-40	1.89839e-38	6	0	16.4364	1492.91	RPL4;RPL5;RPL3;AHNAK;RPL10;RPL12;RPL9;SAT1;ACTB;ACTG1;RPL7;RPS4X;RPL7A;RPS19;CFL1;SPP1;PMEPA1;RPL37;RPS27A;TGM2;EIF5A;IGFBP4;RPL23;RPS6;RPS3A;NAP1L1;ATP1B1;EEF2;TUBB4B;YWHAZ;EIF1;EEF1A1;MYL6;RPS27;ALDH1A1;LCN2;RPL26;TGFBI;PABPC1;RPL28;CALM2;PTMA;TPT1
type II IFN (IFN-gamma1b) DB00033 human GSE5542 sample 2477	43/321	3.57394e-40	1.79293e-38	7	0	16.4364	1492.91	RPL5;TRAM1;HSP90AB1;AHNAK;AMIGO2;AKR1B1;YBX1;SLC7A11;ACTB;ACTG1;RPL7A;TUBA1B;FTH1;CFL1;EIF4B;HSPA8;NQO1;GPX2;TPI1;ANXA2;RPL23;TUBB;TXNRD1;TPM1;KRT7;ACTN4;TUBB4B;EEF1A1;ALDH3A1;SLC7A5;MYL6;KRT19;RPS27;AKR1B10;KRT18;ALDH1A1;S100A6;RPL26;TGFBI;PABPC1;CD24;FTL;ATF4
motexafin gadolinium (4 h) DB05428 human GSE2189 sample 3125	42/302	6.40299e-40	3.0431e-38	8	0	17.0642	1539.98	RPL4;KRT81;RPL3;HSP90AB1;RPL10;RPL12;YBX1;SLC7A11;ACTB;RPS4X;RPL7A;RPS19;PSMD3;EIF4B;G6PD;GPX2;IGFBP4;TUBB;RPS6;AKR1C2;EEF2;EIF1;EEF1A1;NFKBIA;ALDH3A1;SLC7A5;H1F0;PKM;KRT18;PSAT1;S100A6;LCN2;TGFBI;VIM;ALDOA;RPL28;CALM2;GAPDH;RPS24;TPT1;FTL;ATF4
ciprofloxacin 2764 human GSE9166 sample 2624	43/332	1.5786e-39	7.1274e-38	9	0	15.8918	1419.84	TRAM1;RPL3;RPL12;PLOD2;ENO1;ACTB;ACTG1;RPL7A;LDHA;TUBA1B;FTH1;TMSB4X;CFL1;FLNB;TGM2;FDPS;HSPA8;HSP90AA1;ANXA2;TUBB;TPM1;RPS6;KRT8;ASNS;AKR1C2;NEAT1;MYL6;AKR1B10;KRT18;PSAT1;DDIT4;ALDH1A1;HNRNPA2B1;S100A6;RPS20;TGFBI;PABPC1;P4HB;CD24;ALDOA;SQSTM1;TPT1;FTL
MT19c compound SID 134222379 human GSE23616 sample 3352	42/309	1.72579e-39	7.42091e-38	10	0	16.6776	1488.56	RPL3;RPL10;GSTP1;RPL12;TNFAIP2;ENO1;ACTB;ACTG1;LDHA;TUBA1B;TMSB4X;PSMD3;UBC;ERBB2;PGK1;IER3;STARD3;HSPA8;TPI1;LAMB3;ITGA3;IGFBP3;TUBB;KRT8;KRT7;KRT5;ACTN4;EEF2;TUBB4B;SLC7A5;KRT19;PKM;KRT18;DDIT4;VIM;P4HB;PFN1;ALDOA;RPL28;SQSTM1;GAPDH;FTL
Rapamycin DB00877 human GSE5824 sample 2459	37/213	7.88775e-39	3.23756e-37	11	0	21.314	1869.99	TRAM1;HSP90AB1;GSTP1;YBX1;ACTB;ACTG1;RPS4X;LDHA;TUBA1B;CFL1;RPL37;RPS27A;EIF5A;HSPA8;HSP90AA1;TUBB;HMGA1;EEF2;YWHAZ;EEF1A1;SLC7A5;RPS27;PKM;MTHFD2;SCD;PSAT1;FASN;DDIT4;HNRNPA2B1;RPL26;CALR;PABPC1;PFN1;ALDOA;PPIA;GAPDH;ATF4
HYPOCHLOROUS ACID 24341 human GSE11630 sample 3201	37/221	3.33702e-38	1.31014e-36	12	0	20.5424	1772.67	RPL4;RPL3;RPL12;ENO1;ACTB;ACTG1;C3;RPL7A;LDHA;RPS19;TMSB4X;CFL1;UBC;RPL37;SLC38A2;NPM1;S100A2;ANXA2;IGFBP3;RPS6;AKR1C2;RPS3A;EEF1A1;KRT19;AKR1B10;PKM;KRT18;LCN2;TXNIP;RPS20;PABPC1;ALDOA;PPIA;CALM2;GAPDH;TPT1;RAI14
ANTIMONY 5354495 human GSE6907 sample 3532	47/466	3.58566e-38	1.3491e-36	13	0	12.3753	1067.01	RPL4;RPL5;SERPINA3;TRAM1;SERPINE1;AKR1B1;PLOD2;ENO1;YBX1;RPL9;ACTB;RPL7;C3;LDHA;FTH1;PGK1;RPL37;RPS27A;SLC38A2;FDPS;HSPA8;NQO1;GPX2;NPM1;RPL23;RPS6;KRT8;AKR1C2;DHCR24;ATP1B1;EEF2;YWHAZ;EEF1A1;MYL6;AKR1B10;PKM;KRT18;SCD;PSAT1;ALDH1A1;PABPC1;P4HB;ALDOA;PPIA;CALM2;GAPDH;TPT1
ascorbic acid 54670067 human GSE11919 sample 3190	40/287	5.08589e-38	1.83702e-36	14	0	17.101	1468.49	RPL4;SERPINE1;AMIGO2;PLOD2;ENO1;SLC7A11;LOXL2;LDHA;RPS19;FTH1;STC2;UBC;PGK1;SLC38A2;EIF4B;HSPA8;NQO1;TPI1;STAT1;RPL23;IGFBP3;TXNRD1;TPM1;CRIM1;NAP1L1;ACTN4;ATP1B1;EEF2;EIF1;VEGFA;EEF1A1;PKM;PSAT1;DDIT4;TGFBI;PABPC1;ALDOA;GAS5;GAPDH;FTL
IFN-alphacon1 DB05258 human GSE5542 sample 2473	38/244	5.41066e-38	1.87916e-36	15	0	19.1089	1639.73	RPL4;RPL5;KRT81;RPL10;AKAP12;RPS4X;RPL7A;LDHA;PLAU;TMSB4X;CFL1;ITGAV;RPL37;RPS27A;IER3;HSP90AA1;NPM1;ANXA2;RPL23;TXNRD1;TPM1;RPS6;KRT7;ACTN4;ATP1B1;SLC7A5;RPS27;AKR1B10;KRT18;RPS20;RPL26;CD24;RPL28;PPIA;CALM2;GAPDH;FTL;ATF4
decitabine DB01262 human GSE29077 sample 2539	41/321	2.1485e-37	7.18552e-36	16	0	15.6719	1323.19	RPL5;TRAM1;RPL3;HSP90AB1;SERPINE1;AMIGO2;AKR1B1;ENO1;SLC7A11;ACTB;TMSB4X;NAMPT;SPP1;PMEPA1;EIF5A;G6PD;NPM1;IGFBP4;TUBB;ASNS;AKR1C2;NAP1L1;YWHAZ;EREG;EIF1;SLC7A5;H1F0;AKR1B10;CYP24A1;ASPH;MTHFD2;SCD;DDIT4;ALDH1A1;HNRNPA2B1;RPL26;TGFBI;PFN1;CD24;RPL28;ATF4
letrozole 3902 human GSE5462 sample 3097	41/323	2.786e-37	8.98484e-36	17	0	15.5748	1310.95	RPL4;TOP2A;SERPINA3;RPL12;ACTB;ACTG1;RPS4X;LDHA;TUBA1B;RPS19;STC2;CFL1;FLNB;KRT6A;IER3;HSPA8;HSP90AA1;NPM1;ANXA2;IGFBP4;STAT1;TUBB;TPM1;KRT8;NAP1L1;EEF2;TUBB4B;EEF1A1;MYL6;H1F0;KRT18;MTHFD2;TGFBI;PABPC1;ALDOA;RPL28;PPIA;CALM2;GAPDH;PTMA;ATF4
IFN-alphacon1 DB05258 human GSE5542 sample 2474	39/287	1.2982e-36	4.04232e-35	18	0	16.6734	1377.76	RPL4;RPL5;TRAM1;RPL3;AHNAK;RPL12;SERPINE1;AMIGO2;YBX1;RPL9;ACTB;RPL7A;UBC;EIF4B;EIF5A;NQO1;ANXA2;RPL23;TXNRD1;RPS6;ASNS;RPS3A;EEF2;YWHAZ;EIF1;EEF1A1;ALDH3A1;AKR1B10;KRT18;MTHFD2;PSAT1;DDIT4;ALDH1A1;RPL26;PABPC1;VIM;RPS24;FTL;ATF4
HYPOCHLOROUS ACID 24341 human GSE11630 sample 3200	39/294	3.40537e-36	1.02502e-34	19	0	16.2764	1329.26	SERPINA3;AHNAK;TNFAIP2;AKR1B1;IFIT2;ACTG1;CTGF;RPL7;RPS4X;PLAU;FTH1;TMSB4X;UBC;ITGAV;SLC38A2;IER3;NPM1;S100A2;LAMB3;TIPARP;IGFBP3;DHCR24;ACTN4;EEF1A1;KRT19;RPS27;ALDH1A1;HNRNPA2B1;S100A6;LCN2;RPS20;TGFBI;PABPC1;VIM;CD24;CALM2;GAPDH;TPT1;ATF4
testosterone 6013 human GSE5106 sample 3206	40/329	1.35768e-35	3.95479e-34	20	0	14.9179	1197.68	RPL4;RPL3;RPL12;AKR1B1;RPL9;ACTB;ACTG1;C3;RPS4X;RPL7A;LDHA;TUBA1B;TMSB4X;CFL1;RPL37;RPS27A;ANXA2;TUBB;TPM1;RPS6;AKR1C2;RPS3A;ATP1B1;EEF2;TUBB4B;EEF1A1;MYL6;PKM;S100A6;TXNIP;RPS20;RPL26;PABPC1;VIM;PFN1;PPIA;CALM2;GAPDH;RPS24;FTL
IFN-gamma1b DB00033 human GSE5542 sample 2476	37/266	4.23387e-35	1.19474e-33	21	0	17.0672	1350.82	KRT81;GSTP1;SERPINE1;AMIGO2;SLC7A11;ACTB;RPL7A;LDHA;PLAU;CFL1;RPS27A;SLC38A2;IER3;EIF5A;NQO1;G6PD;ANXA2;TIPARP;TXNRD1;TPM1;LIF;KRT7;AKR1C2;ATP1B1;EREG;NFKBIA;ALDH3A1;SLC7A5;AKR1B10;KRT18;DDIT4;ALDH1A1;CD24;RPL28;CALM2;GAPDH;FTL
decitabine 451668 mouse GSE4768 sample 3108	35/226	6.97729e-35	1.90924e-33	22	0	19.0021	1494.48	RPL4;RPL5;RPL3;HSP90AB1;RPL10;SERPINE1;ACTB;ACTG1;LOXL2;RPL7;RPS4X;RPL7A;LDHA;TUBA1B;RPS19;TMSB4X;CFL1;SPP1;RPS27A;NPM1;RPL23;EEF1A1;MYL6;PKM;PSAT1;S100A6;RPL26;VIM;PFN1;RPL28;PPIA;GAPDH;PTMA;RPS24;TPT1
5-aza-2'-deoxycytidine DB01262 human GSE5230 sample 2497	35/228	9.62327e-35	2.55583e-33	23	0	18.8354	1475.31	RPL4;RPL5;RPL3;HSP90AB1;ENO1;YBX1;SLC7A11;RPL9;ACTB;RPS4X;TUBA1B;FTH1;UBC;IER3;EIF5A;NPM1;RPL23;TUBB;RPS6;ASNS;RPS3A;EEF2;TUBB4B;EIF1;H1F0;KRT18;MTHFD2;SCD;PSAT1;DDIT4;RPS20;RPL26;P4HB;FTL;ATF4
lung cancer DB00928 human GSE29077 sample 2536	39/320	9.8926e-35	2.55229e-33	24	0	14.954	1170.88	TOP2A;TRAM1;AKR1B1;PLOD2;ENO1;SAT1;ACTB;LDHA;TMSB4X;PGK1;SPP1;PMEPA1;ITGAV;IER3;G6PD;GPX2;TPI1;IGFBP4;TUBB;TPM1;KRT8;ACTN4;ATP1B1;TUBB4B;YWHAZ;ALDH3A1;MYL6;PKM;KRT18;CYP24A1;SCD;ALDH1A1;HNRNPA2B1;S100A6;CALR;TGFBI;PFN1;CD24;ALDOA
Bisphenol A 6623 human GSE17624 sample 2657	34/208	1.01788e-34	2.55318e-33	25	0	20.0566	1569.84	RPL3;RPL12;ENO1;YBX1;ACTB;ACTG1;RPL7A;LDHA;TUBA1B;RPS19;UBC;ITGAV;TPI1;ANXA2;IGFBP3;TUBB;TPM1;RPS6;RPS3A;EEF2;TUBB4B;EEF1A1;MYL6;KRT19;PKM;KRT18;PSAT1;TXNIP;RPS20;ALDOA;RPL28;PPIA;GAPDH;TPT1
BPDE 41322 human GSE19510 sample 3377	37/274	1.30683e-34	3.18936e-33	26	0	16.5689	1292.71	TOP2A;RPL3;HSP90AB1;SERPINE1;ENO1;ACTB;ACTG1;LOXL2;RPL7A;LDHA;TUBA1B;UBC;SLC38A2;HSPA8;HSP90AA1;NPM1;ANXA2;TUBB;HMGA1;ASNS;ACTN4;EEF2;TUBB4B;YWHAZ;EEF1A1;PKM;MTHFD2;PSAT1;DDIT4;S100A6;CALR;PABPC1;VIM;PFN1;CALM2;PTMA;ATF4
apratoxin A 6326668 human GSE2742 sample 3067	40/355	2.93052e-34	6.96384e-33	27	0	13.8253	1067.49	RPL4;RPL3;RPL10;ENO1;YBX1;ACTB;ACTG1;RPS4X;TUBA1B;FTH1;CFL1;PSMD3;IER3;EIF5A;NQO1;G6PD;NPM1;TPI1;ANXA2;TUBB;TXNRD1;KRT8;HMGA1;AKR1C2;ACTN4;ATP1B1;EEF2;TUBB4B;YWHAZ;SLC7A5;KRT19;AKR1B10;KRT18;ALDH1A1;PABPC1;P4HB;PFN1;ALDOA;PPIA;CALM2
lung cancer DB00928 human GSE29077 sample 2535	40/355	2.93052e-34	6.78528e-33	28	0	13.8253	1067.49	TOP2A;TRAM1;HSP90AB1;RPL10;AMIGO2;AKR1B1;PLOD2;ENO1;SAT1;ACTB;LDHA;TMSB4X;PGK1;SPP1;PMEPA1;ITGAV;G6PD;GPX2;IGFBP4;TUBB;TPM1;KRT8;ACTN4;ATP1B1;TUBB4B;YWHAZ;ALDH3A1;MYL6;PKM;KRT18;CYP24A1;SCD;ALDH1A1;HNRNPA2B1;S100A6;CALR;TGFBI;PFN1;CD24;ALDOA
HYPOCHLOROUS ACID 24341 human GSE11630 sample 3197	34/215	3.31065e-34	7.47379e-33	29	0	19.4036	1495.84	RPL4;SERPINA3;RPL3;RPL10;RPL12;YBX1;ACTB;ACTG1;C3;RPL7A;LDHA;UBC;SPP1;SLC38A2;GPX2;S100A2;ANXA2;IGFBP3;AKR1C2;RPS3A;NFKBIA;KRT19;RPS27;PKM;KRT18;S100A6;LCN2;TXNIP;PABPC1;VIM;PFN1;PPIA;CALM2;GAPDH
lapatinib DB01259 human GSE16179 sample 2580	26/89	8.20874e-34	1.80793e-32	30	0	35.8448	2730.75	RPL3;RPL12;RPL9;ACTB;ACTG1;RPS4X;TUBA1B;LDHA;RPS19;PSMD3;CFL1;HSPA8;HSP90AA1;TPI1;TUBB4B;EEF1A1;PKM;RPS27;S100A6;RPS20;PABPC1;ALDOA;PPIA;GAPDH;RPS24;TPT1
bexarotene DB00307 human GSE6914 sample 2680	43/453	1.06725e-33	2.2946e-32	31	0	11.647	884.24	ITGB1;HSP90AB1;GSTP1;YBX1;ACTG1;RPL7;AKAP12;TMSB4X;CFL1;PGK1;EIF5A;HSPA8;G6PD;HSP90AA1;ANXA2;TUBB;TXNRD1;HMGA1;ASNS;NAP1L1;ACTN4;YWHAZ;EREG;EIF1;SLC7A5;H1F0;KRT19;PKM;KRT18;CYP24A1;MTHFD2;SCD;PSAT1;HNRNPA2B1;S100A6;PABPC1;P4HB;PFN1;CALM2;PTMA;TPT1;FTL;ATF4
apratoxin A 6326668 human GSE2742 sample 3066	33/203	1.29211e-33	2.71344e-32	32	0	19.9462	1510.51	RPL4;RPL3;RPL10;YBX1;ACTB;ACTG1;RPL7;RPS4X;LDHA;TUBA1B;FTH1;CFL1;IER3;G6PD;ANXA2;TUBB;KRT8;AKR1C2;RPS3A;YWHAZ;EEF1A1;AKR1B10;PKM;ALDH1A1;RPS20;PABPC1;PFN1;CD24;ALDOA;PPIA;GAPDH;TPT1;FTL
Bisphenol A 6623 human GSE17624 sample 2660	36/275	3.59191e-33	7.37158e-32	33	0	16.0625	1199.97	RPL3;HSP90AB1;ENO1;YBX1;RPL9;ACTB;ACTG1;RPL7A;LDHA;TMSB4X;UBC;PGK1;RPS27A;S100A2;LAMB3;RPL23;IGFBP3;RPS3A;EEF2;TUBB4B;YWHAZ;EIF1;VEGFA;MYL6;KRT19;KRT18;SCD;PSAT1;RPS20;RPL26;CALR;P4HB;PFN1;RPL28;TPT1;ATF4
4-Hydroxynonenal 5283344 human GSE2397 sample 3079	33/210	4.16799e-33	8.36377e-32	34	0	19.2813	1437.58	RPL3;HSP90AB1;RPL12;RPL9;ACTB;ACTG1;RPS4X;LDHA;TUBA1B;RPS19;CFL1;UBC;RPS27A;HSP90AA1;TUBB;HMGA1;ASNS;RPS3A;EEF2;EIF1;EEF1A1;DDIT4;S100A6;RPS20;PABPC1;PFN1;ALDOA;CALM2;GAPDH;PTMA;TPT1;FTL;ATF4
trovafloxacin 62959 human GSE9166 sample 2623	40/381	4.96569e-33	9.74786e-32	35	0	12.8818	958.186	TOP2A;HSP90AB1;RPL12;AKR1B1;ENO1;RPL7A;LDHA;TUBA1B;PGK1;FDPS;GPX2;HSP90AA1;TPI1;ANXA2;TUBB;AKR1C2;DHCR24;NAP1L1;EEF2;TUBB4B;EEF1A1;MYL6;H1F0;PKM;KRT18;MTHFD2;SCD;PSAT1;FASN;HNRNPA2B1;RPS20;CALR;TGFBI;PABPC1;P4HB;PFN1;ALDOA;PPIA;CALM2;GAPDH
4-Hydroxytamoxifen 449459 human GSE26298 sample 3239	32/199	1.92646e-32	3.70126e-31	36	0	19.7306	1440.86	SERPINA3;HSP90AB1;ENO1;SAT1;ACTB;ACTG1;RPL7;RPS4X;FTH1;TMSB4X;UBC;ITGAV;ABCC3;HSPA8;NQO1;HSP90AA1;IGFBP3;KRT8;RPS3A;ATP1B1;NEAT1;EEF2;YWHAZ;EEF1A1;NFKBIA;MYL6;KRT18;LCN2;TGFBI;PABPC1;CD24;TPT1
Promyelocytic leukemia DB00755 human GSE5007 sample 2461	36/291	2.85565e-32	5.37218e-31	37	0	15.1793	1102.52	RPL4;RPL5;RPL3;HSP90AB1;RPL12;ENO1;YBX1;RPL9;RPL7;RPS4X;RPL7A;LDHA;TUBA1B;SLC38A2;HSP90AA1;NPM1;RPL23;TUBB;RPS6;ASNS;RPS3A;EEF2;EIF1;SLC7A5;MTHFD2;PSAT1;DDIT4;HNRNPA2B1;RPS20;RPL26;PABPC1;P4HB;PPIA;GAPDH;PTMA;ATF4
ubiquinol 9962735 human GSE21351 sample 3448	37/319	3.98545e-32	7.34461e-31	38	0	14.2316	1028.95	RPL4;PPP1R15A;RPL5;RPL3;RPL10;ENO1;YBX1;SAT1;ACTB;ACTG1;RPS4X;LDHA;TUBA1B;FTH1;NAMPT;UBC;PGK1;EIF4B;IER3;JUN;NPM1;RPS6;RPS3A;NEAT1;EEF2;YWHAZ;EIF1;EEF1A1;NFKBIA;ALDH1A1;TGFBI;PABPC1;VIM;ALDOA;GAPDH;PTMA;ATF4
BPDE 41322 human GSE19510 sample 3378	34/248	5.06669e-32	9.15044e-31	39	0	16.8217	1212.17	RPL4;TOP2A;RPL5;RPL3;HSP90AB1;SERPINE1;ENO1;ACTG1;CTGF;LOXL2;RPS4X;RPL7A;LDHA;TUBA1B;UBC;PGK1;SLC38A2;HSPA8;HSP90AA1;NPM1;RPL23;IGFBP3;TUBB;ASNS;EEF2;TUBB4B;EEF1A1;PSAT1;DDIT4;TXNIP;TGFBI;VIM;CALM2;PTMA
puromycin, EC50, 1 d 439530 human GSE6930 sample 3268	38/349	5.89896e-32	1.04446e-30	40	0	13.3598	960.677	RPL3;HSP90AB1;GSTP1;AKR1B1;ENO1;SLC7A11;ACTG1;CTGF;LDHA;CFL1;SLC38A2;IER3;EIF5A;TPI1;TUBB;TPM1;HMGA1;ASNS;DHCR24;RPS3A;EEF2;TUBB4B;EIF1;SLC7A5;PKM;KRT18;SCD;PSAT1;FASN;PABPC1;VIM;P4HB;PFN1;ALDOA;RPL28;GAPDH;FTL;ATF4
PLX4720 CID 24180719 human GSE50791 sample 2507	35/285	2.94271e-31	5.11012e-30	41	0	15.0683	1059.32	ITGB1;TRAM1;HSP90AB1;GSTP1;PLOD2;ENO1;SAT1;ACTB;IFIT2;LDHA;TMSB4X;PGK1;FLNB;IER3;TPI1;ANXA2;IGFBP4;STAT1;ATP1B1;TUBB4B;DCBLD2;H1F0;KRT19;PKM;OAS2;SCD;FASN;DDIT4;S100A6;TXNIP;TGFBI;P4HB;PFN1;ALDOA;GAPDH
decitabine DB01262 human GSE29077 sample 2538	37/337	3.06283e-31	5.21837e-30	42	0	13.4714	946.515	RPL5;TRAM1;SERPINE1;AMIGO2;AKR1B1;ENO1;SLC7A11;SAT1;RPL7;TMSB4X;NAMPT;SPP1;PMEPA1;ITGAV;FLNB;G6PD;IGFBP4;TPM1;CRIM1;KRT7;YWHAZ;EREG;SLC7A5;AKR1B10;CYP24A1;ASPH;SCD;ALDH1A1;HNRNPA2B1;RPL26;TGFBI;VIM;PFN1;CD24;RPL28;ATF4;RAI14
2,3,7,8-tetrachlorodibenzo-p-dioxin 10852289 human GSE24193 sample 3189	35/291	6.15622e-31	1.02946e-29	43	0	14.7577	1026.58	RPL12;TNFAIP2;PLOD2;ENO1;ACTB;CXCL5;ACTG1;RPL7;LDHA;RPS19;FTH1;TMSB4X;UBC;PGK1;SPP1;RPL37;RPS27A;SLC38A2;IER3;RPL23;RPS6;RPS3A;NAP1L1;EEF1A1;MYL6;PKM;TXNIP;RPL26;ALDOA;PPIA;GAPDH;PTMA;RPS24;TPT1;FTL
lung cancer DB00928 human GSE29077 sample 2534	37/344	6.55131e-31	1.07561e-29	44	0	13.1973	917.22	TRAM1;SERPINE1;AMIGO2;AKR1B1;PLOD2;ENO1;SAT1;ACTB;CTGF;LOXL2;TMSB4X;PGK1;SPP1;PMEPA1;ITGAV;RPS27A;G6PD;IGFBP4;TUBB;TPM1;KRT8;ATP1B1;TUBB4B;YWHAZ;AKR1B10;CYP24A1;ASPH;HNRNPA2B1;S100A6;CALR;TGFBI;VIM;P4HB;PFN1;CD24;CALM2;RAI14
Mehp 20393 rat GSE4514 sample 3576	32/228	1.76812e-30	2.8511e-29	45	0	17.221	1179.77	RPL5;RPL10;GSTP1;ACTB;RPS4X;RPL7A;RPS19;FTH1;TMSB4X;RPL37;RPS27A;FDPS;HSPA8;RPL23;RPS3A;EIF1;EEF1A1;RPS27;PSAT1;ALDH1A1;HNRNPA2B1;TXNIP;RPS20;RPL26;VIM;ALDOA;RPL28;PPIA;CALM2;PTMA;RPS24;TPT1
troglitazone DB00197 rat GSE21329 sample 2832	37/355	2.09078e-30	3.31223e-29	46	0	12.7884	873.959	RPL4;RPL5;RPL3;AHNAK;RPL10;RPL12;RPL9;ACTB;RPS4X;RPL7A;RPS19;CFL1;SPP1;PMEPA1;RPL37;RPS27A;TGM2;ANXA2;IGFBP4;RPL23;RPS6;NAP1L1;ATP1B1;TUBB4B;YWHAZ;EIF1;RPS27;ALDH1A1;LCN2;RPL26;CALR;PABPC1;PFN1;RPL28;CALM2;PTMA;TPT1
estradiol DB00783 human GSE11352 sample 2729	31/210	3.09899e-30	4.82481e-29	47	0	18.1128	1230.7	RPL12;ENO1;SAT1;ACTB;ACTG1;RPS4X;RPS19;FTH1;TMSB4X;UBC;EIF4B;NQO1;TXNRD1;RPS6;DHCR24;RPS3A;ATP1B1;EEF2;EEF1A1;NFKBIA;MYL6;H1F0;KRT18;DDIT4;TXNIP;CD24;RPL28;PPIA;GAPDH;TPT1;ATF4
apratoxin A 6326668 human GSE2742 sample 3071	38/389	3.55043e-30	5.43396e-29	48	0	11.9861	812.78	RPL4;RPL3;HSP90AB1;RPL10;GSTP1;ENO1;RPL9;ACTB;TUBA1B;TMSB4X;PGK1;RPL37;EIF4B;EIF5A;FDPS;HSPA8;TUBB;KRT8;HMGA1;DHCR24;EEF2;TUBB4B;YWHAZ;H1F0;KRT19;RPS27;PKM;SCD;HNRNPA2B1;S100A6;LCN2;RPL26;P4HB;PFN1;CD24;RPL28;CALM2;RPS24
arachidonic acid 444899 human GSE3737 sample 3119	32/233	3.60882e-30	5.43127e-29	49	0	16.8514	1142.43	RPL12;ENO1;RPL9;ACTB;ACTG1;RPL7;RPS4X;LDHA;TUBA1B;RPS19;CFL1;RPS27A;ANXA2;RPS3A;EEF2;EEF1A1;MYL6;RPS27;PKM;HNRNPA2B1;S100A6;RPS20;RPL26;CALR;PABPC1;PFN1;ALDOA;PPIA;GAPDH;PTMA;TPT1;ATF4
doxycycline DB00254 human GSE2624 sample 3074	39/425	6.13991e-30	9.08908e-29	50	0	11.2595	757.343	RPL4;ITGB1;RPL5;HSP90AB1;RPL10;PLOD2;ENO1;YBX1;CTGF;LDHA;UBC;PGK1;RPS27A;HSPA8;HSP90AA1;NPM1;TPI1;S100A2;IGFBP4;RPL23;TUBB;TXNRD1;TPM1;KRT8;KRT7;DHCR24;EEF2;YWHAZ;SLC7A5;RPS27;PKM;MTHFD2;HNRNPA2B1;CALR;TGFBI;VIM;CD24;ALDOA;CALM2
tamoxifen DB00675 human GSE4025 sample 2820	32/239	8.30735e-30	1.20993e-28	51	0	16.4284	1100.05	RPL4;RPL5;KRT81;RPL3;HSP90AB1;RPL12;ENO1;RPL9;RPL7;RPS4X;FTH1;TMSB4X;PGK1;RPL37;EIF4B;ANXA2;RPL23;RPS6;KRT8;DHCR24;RPS3A;EEF1A1;NFKBIA;MYL6;KRT19;KRT18;DDIT4;PABPC1;CD24;RPS24;TPT1;FTL
PLX4720 CID 24180719 human GSE50791 sample 2506	34/297	2.56296e-29	3.67358e-28	52	0	14.0464	924.728	RPL4;RPL3;HSP90AB1;ENO1;YBX1;SAT1;ACTB;LDHA;TUBA1B;TMSB4X;CFL1;PGK1;IER3;EIF5A;HSPA8;G6PD;HSP90AA1;TPI1;ANXA2;TUBB;ASNS;TUBB4B;DCBLD2;SLC7A5;PKM;MTHFD2;SCD;FASN;TGFBI;PABPC1;PFN1;ALDOA;CALM2;GAPDH
Bisphenol A 6623 human GSE17624 sample 2663	33/277	4.93728e-29	6.9662e-28	53	0	14.6176	952.749	HSP90AB1;ENO1;ACTB;ACTG1;RPL7A;LDHA;TUBA1B;CFL1;PGK1;HSPA8;HSP90AA1;TPI1;S100A2;ANXA2;IGFBP3;TUBB;TPM1;KRT8;DHCR24;ACTN4;ATP1B1;TUBB4B;YWHAZ;MYL6;KRT19;PKM;KRT18;S100A6;TXNIP;PFN1;PPIA;CALM2;GAPDH
nicotine 942 human GSE6264 sample 3064	31/230	5.65059e-29	7.84997e-28	54	0	16.5377	1075.67	RPL4;RPL3;HSP90AB1;GSTP1;RPL12;AKR1B1;YBX1;RPL9;ACTB;ACTG1;RPS4X;RPL7A;LDHA;TUBA1B;RPS19;TMSB4X;CFL1;UBC;PGK1;HSPA8;NPM1;RPL23;RPS6;RPS27;RPS20;RPL26;PFN1;CALM2;GAPDH;PTMA;TPT1
paclitaxel DB01229 human GSE19136 sample 2576	36/360	6.15008e-29	8.41443e-28	55	0	12.2699	797.037	RPL4;SERPINA3;RPL3;PLOD2;ENO1;ACTB;ACTG1;CTGF;AKAP12;RPS4X;LDHA;PGK1;SPP1;PMEPA1;EIF4B;TGM2;TPI1;IGFBP4;RPL23;IGFBP3;RPS6;NAP1L1;EEF2;EIF1;VEGFA;NFKBIA;MYL6;PKM;DDIT4;ALDH1A1;TXNIP;TGFBI;ALDOA;GAPDH;TPT1;ATF4
[truncated: 817 more rows]

## Sheet: Drug Perturbations from GEO up
Term	Overlap	P-value	Adjusted P-value	Old P-value	Old Adjusted P-value	Odds Ratio	Combined Score	Genes
[truncated: 898 more rows]

## Sheet: Virus-Host PPI P-HIPSTer 2020
Term	Overlap	P-value	Adjusted P-value	Old P-value	Old Adjusted P-value	Odds Ratio	Combined Score	Genes
[truncated: 6,555 more rows]

[truncated: 5 more sheets: Virus Perturbations from GEO up, Virus Perturbations from GEO do, LINCS L1000 Chem Pert up, LINCS L1000 Chem Pert down, KEGG 2019 Human]
